# Supplementary material
Source: MDPI journal article supplement (https://www.mdpi.com/search?q=life-11-00291)
Supplement: s001 [file life-11-00291-s001.pdf]

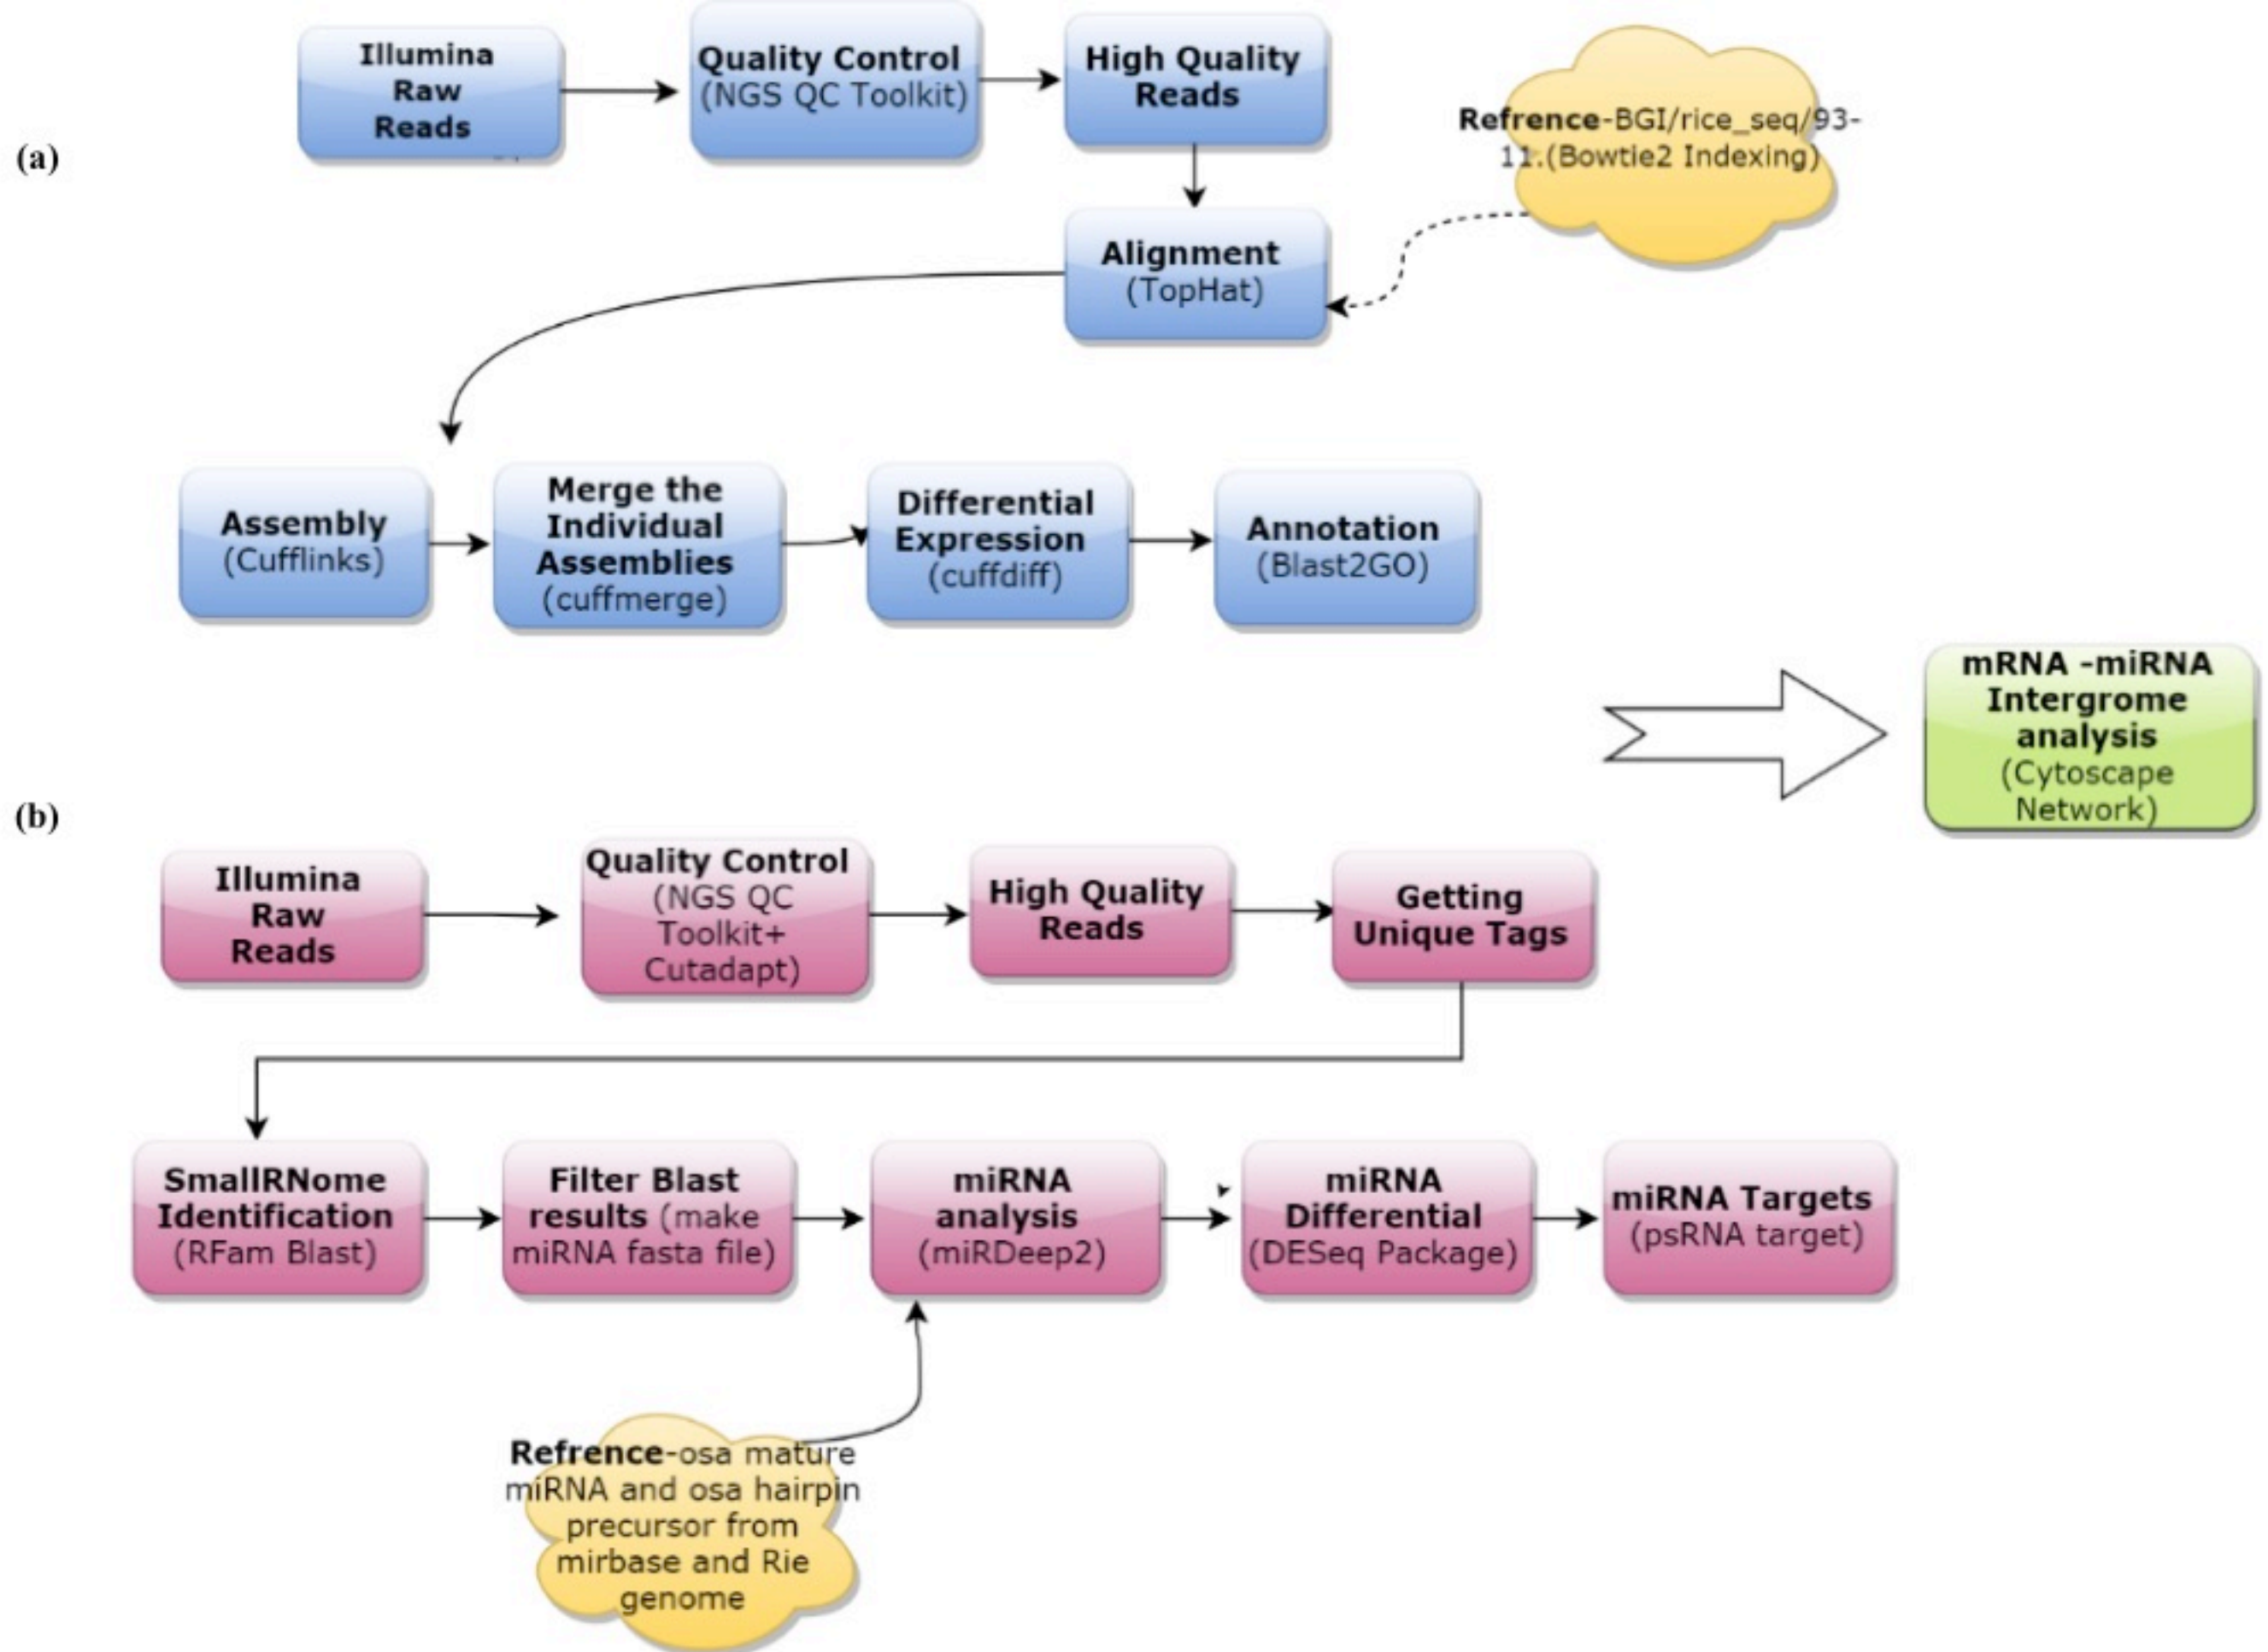

**Supplementary Figure 1:** Bioinformatics workflow used for analyzing the RNA-seq data. It illustrates the stepwise use of tools and databases to identify the (a) transcripts and (b) miRs and their targets.

Supplementary Fig S2:

GO enrichment of the terms associated with the differentially expressed transcripts classified as molecular function, cellular components and biological processes. The DETs were searched against NRDB protein data base using Blastx program from BLAST2GO. Annotation was done using Blast2GO v5.0 for significantly Up and Down regulated transcripts. (a) P<sup>+</sup>H<sup>-</sup> vs P<sup>-</sup>H<sup>-</sup> (b) P<sup>+</sup>H<sup>+</sup> vs P<sup>-</sup>H<sup>-</sup> and (c) P<sup>-</sup>H<sup>+</sup> vs P<sup>-</sup>H<sup>-</sup>.

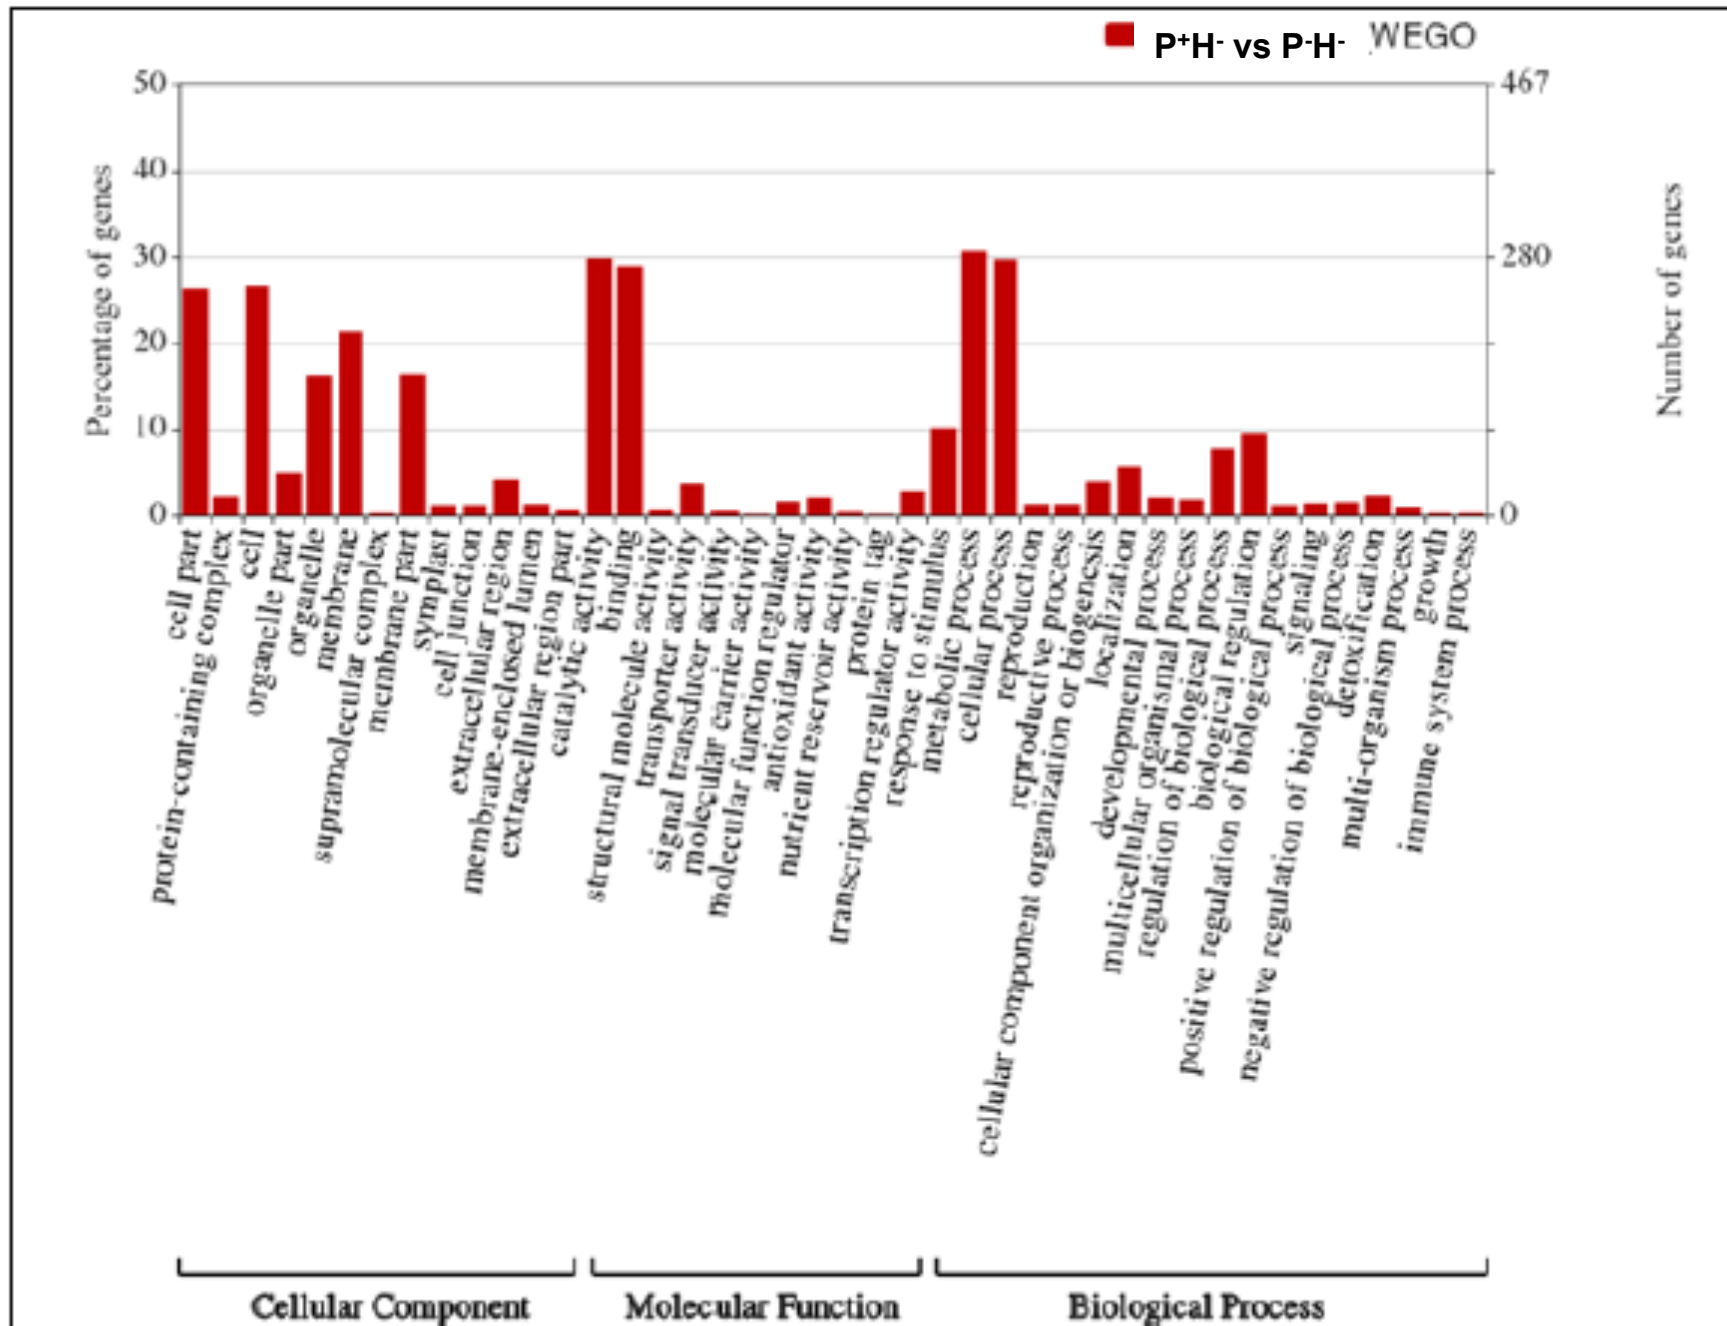

Gene ontology (GO) classification for the DEGs. Transcript sequences were hit against NRDB Protein database using Blastx program from BLAST2GO.

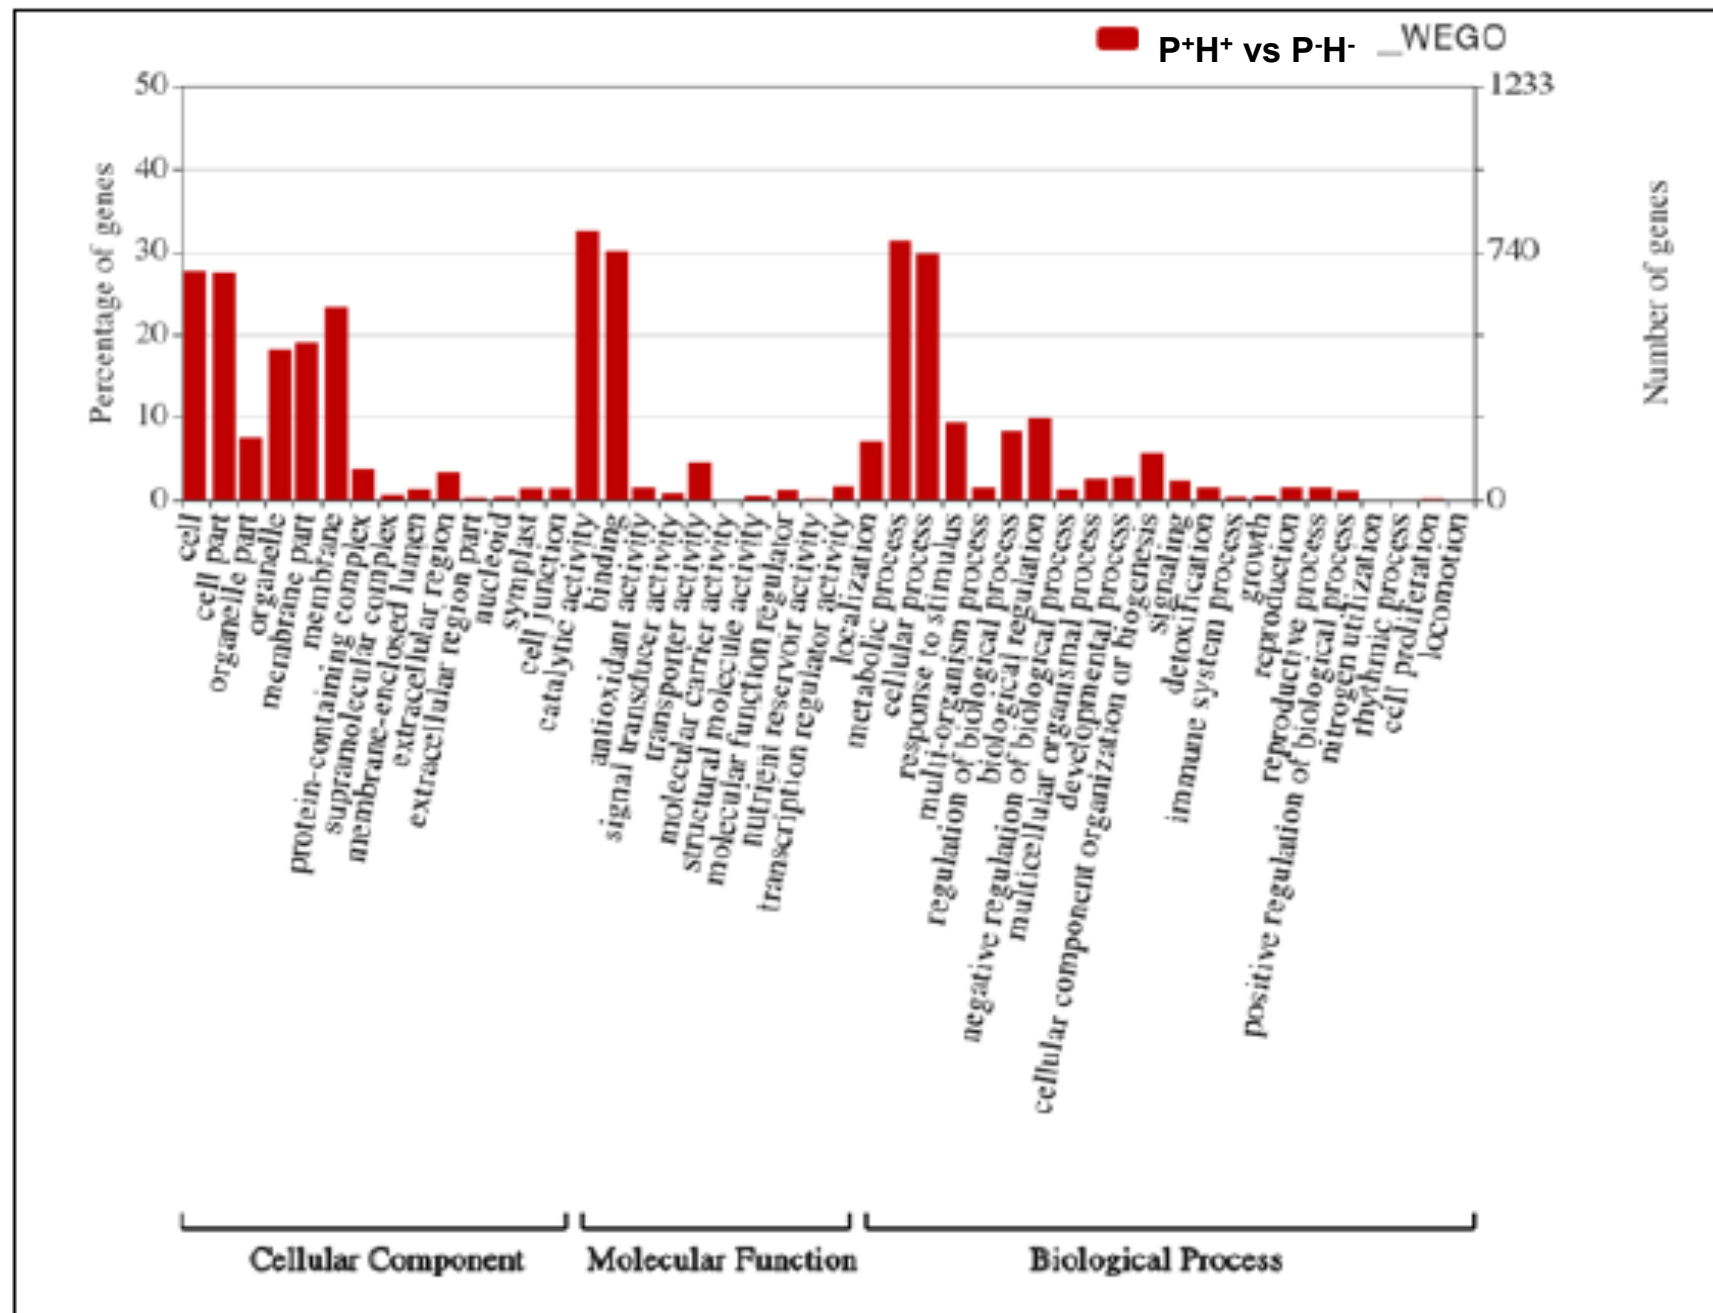

Gene ontology (GO) classification for the DEGs. Transcript sequences were hit against NRDB Protein database using Blastx program from BLAST2GO..

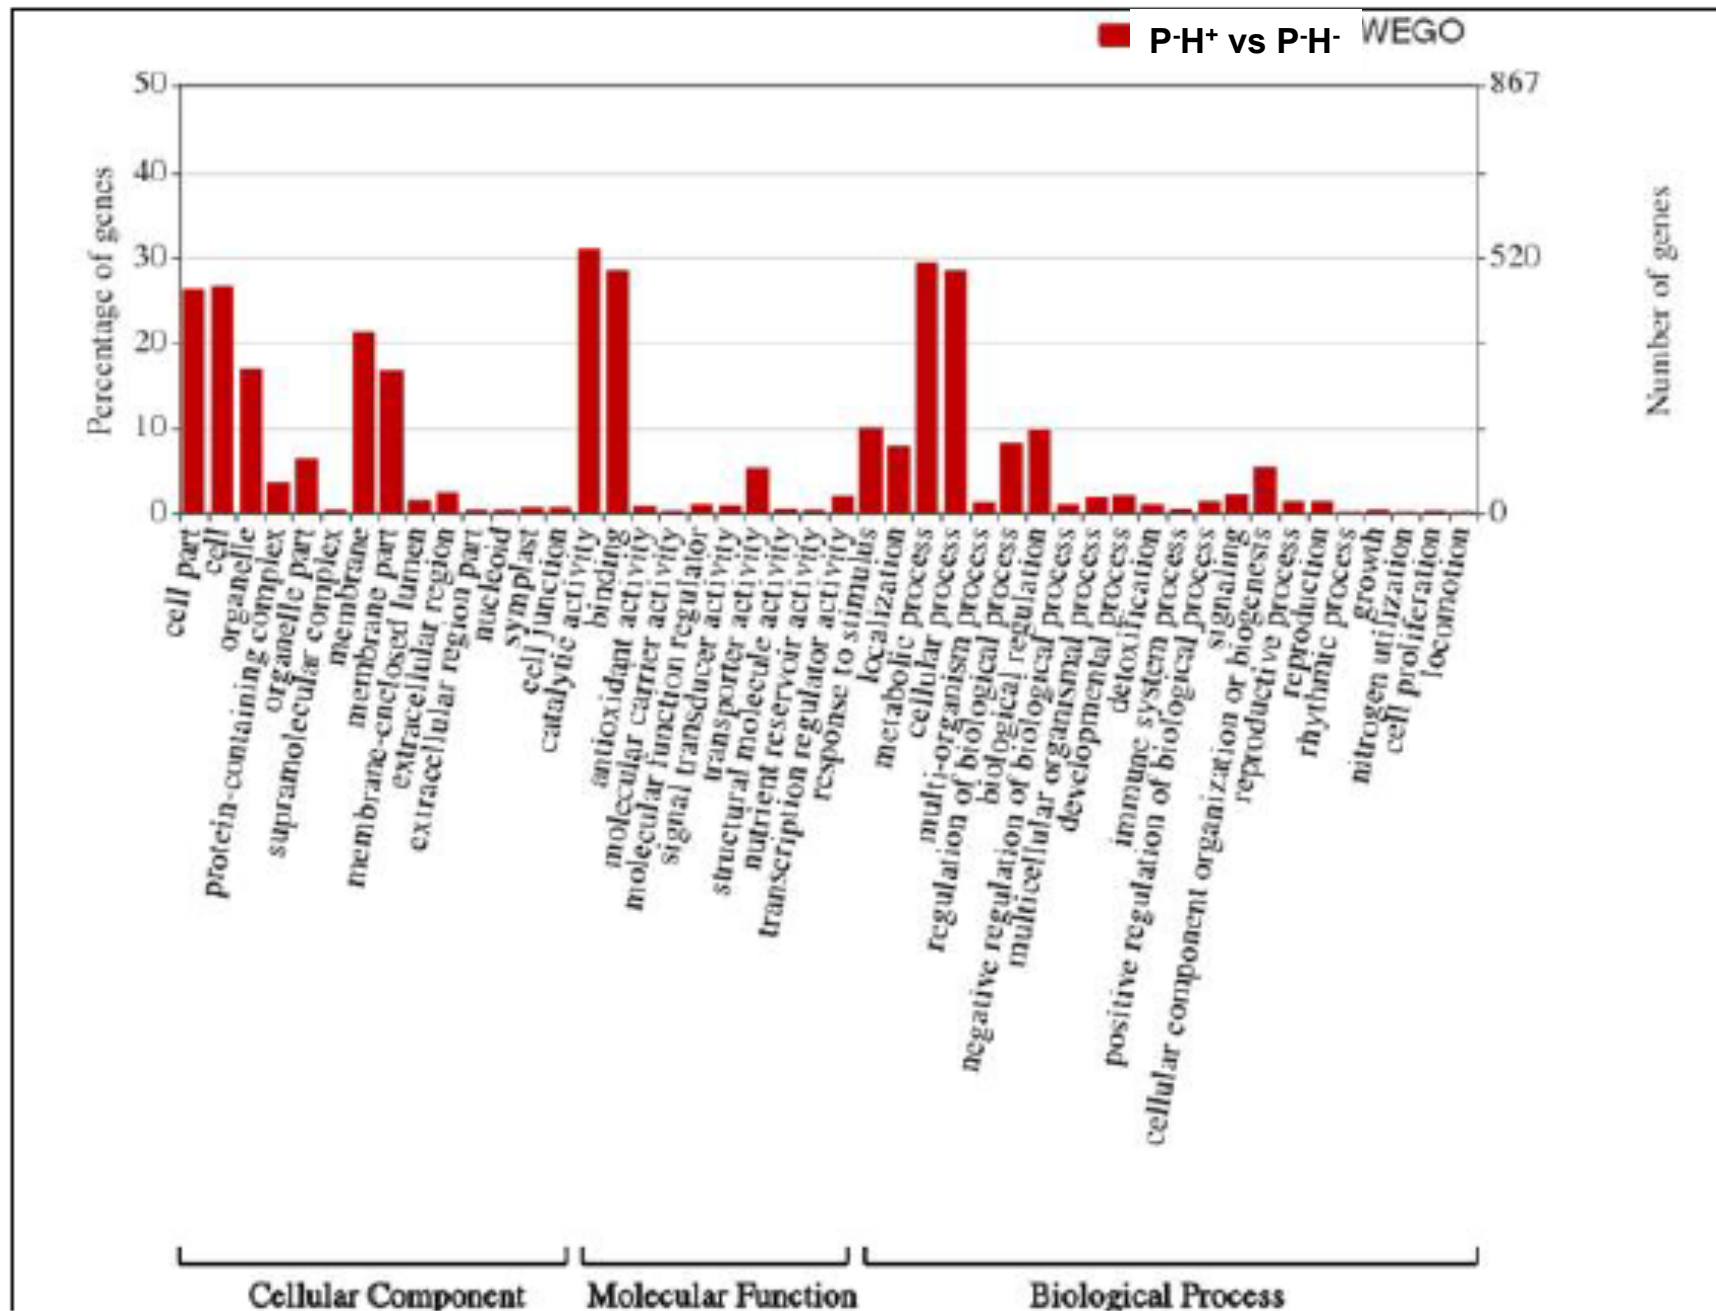

Gene ontology (GO) classification for the DEGs. Transcript sequences were hit against NRDB Protein database using Blastx program from BLAST2GO..

Supplementary Table S1: List of primers pairs of miRs and their corresponding targets used for qRT-PCR. These were designed using primer3 Web software.

miRs

| Primer name          | Primer sequence (5'-3')                            |
|----------------------|----------------------------------------------------|
| osa-miR531b(SL)      | gTCgTaTCCaGTgCagggTCCgaggTaTTCgCaCTggaTaCgaCCggCaC |
| osa-miR531b(FP)      | gCaCTCgCCggggCTg                                   |
| osa-miR5149(SL)      | gTCgTaTCCagTgCagggTCCgaggTaTTCgCaCTggaTaCgaCTCCaa  |
| osa-miR5149(FP)      | aCgCagaggagCTgTgaCga                               |
| osa-miR168a(SL)      | gTCgTaTCCagTgCagggTCCgaggTaTTCgCaCTggaTaCgaCgTCCCg |
| osa-miR168a(FP)      | CgCaTCgCTTggTgCaGa                                 |
| osa-miR1846d-5p(SL)  | gTCgTaTCCagTgCagggTCCgaggTaTTCgCaCTggaTaCgaCgagaTC |
| osa-miR1846d-5p(FP)  | gaCTCCCaCCgagCagCC                                 |
| osa-miR5077(SL)      | gTCgTaTCCagTgCagggTCCgaggTaTTCgCaCTggaTaCgaCTggTga |
| osa-miR5077(FP)      | CgCagTTCgCgTCggg                                   |
| osa-miR156(SL)       | gTCgTaTCCagTgCagggTCCgaggTaTTCgCaCTggaTaCgaCgTgCTC |
| osa-miR156(FP)       | CgaCTgaCagaagagagT                                 |
| osa-miR167i+e-3p(SL) | gTCgTaTCCagTgCagggTCCgaggTaTTCgCaCTggaTaCgaCagTgaa |
| osa-miR167i+e-3p(FP) | CaCgaCagaTCaTgTTgCagC                              |

miR targets

| Primer name     | Primer sequence (5'-3') | Target ID                                                       |
|-----------------|-------------------------|-----------------------------------------------------------------|
| HSPMITO-FP      | CTCAGATGTGTCCGTGATCC    | XP_006647931.1 24.1 kDa heat shock protein, mitochondrial-like  |
| HSPMITO-RP      | CCTCCTCGTCTCCTTCCG      |                                                                 |
| HSP90-6.MITO-FP | GTACCAGGCAGAGGTCAATAGG  | XP_015698315.1 heat shock protein 90-6, mitochondrial           |
| HSP90-6.MITO-RP | GACAAGCTCTCGAAGAAACACC  |                                                                 |
| HSTFB-2cIX2-FP  | ACAACAACCTTCTCCAGCTTCG  | XP_004957414.1 heat stress transcription factor B-2c isoform X2 |
| HSTFB-2cIX2-RP  | ATCACACAACAACGCTTCTCC   |                                                                 |
| HSTFB-2a-FP     | CTGTTCTGCTCTGTTCATGG    | XP_002446950.1 heat stress transcription factor B-2a            |
| HSTFB-2a-RP     | ACCGTTGTATGCACTGTCAAC   |                                                                 |
| sHSPChlo-FP     | CCACTCTCACCATATCATGTCC  | XP_004983363.1 small heat shock protein, chloroplastic          |
| sHSPChlo-RP     | CTTCTTCGCTTGCTTCTTCG    |                                                                 |
| HSTFB-2c A-9 FP | CACGGAGTGGTACTTCTTCAGC  | XP_015690243.1 heat stress transcription factor A-9             |
| HSTFB-2c A-9 RP | GGTGGCCTTCCAGTAGCC      |                                                                 |
| HSFA-2aFP       | TTCAAGCACAGCAACTTCTCC   | XP_012704129.1 heat stress transcription factor A-2a            |
| HSFA-2aRP       | GACCTTCTGAACCCGTAGG     |                                                                 |
| 18s FP          | CTACGTCCTGCCCTTTGTACA   | INTERNAL PRIMER FORWARD PRIMER                                  |
| 18s RP          | ACACTTACCGGACCATTCAA    | INTERNAL PRIMER REVERSE PRIMER                                  |

Supplementary Table S2: Table listing the log2 fold change values of differentially expressed transcripts calculated for the transcripts in different libraries (P+H-, P+H+ and P-H+) with respect to control non-primed plants (P-H-),

| 17025 common element | log2FC_P+H- vs P-H- | log2FC_P+H+ vs P-H- | log2FC_P-H+ vs P-H- | BGI ID        | Description                                                                    |
|----------------------|---------------------|---------------------|---------------------|---------------|--------------------------------------------------------------------------------|
| TCONS_00020649       | -5.15394            | -5.16147            | -0.114342           | BGIOSGA013373 | XP_006656053.1 probable xyloglucan endotransglucosylase/hydrolase protein 26   |
| TCONS_00001859       | -5.05957            | -2.85023            | -2.44994            | BGIOSGA013370 | XP_006644739.1 nucleobase-ascorbate transporter 2-like                         |
| TCONS_00032722       | -4.79681            | -2.36447            | -4.40865            | BGIOSGA025892 | XP_004983616.1beta-amylase 3, chloroplastic                                    |
| TCONS_00016486       | -4.55562            | -2.24076            | -4.41295            | BGIOSGA005828 | XP_003580392.1protein REVEILLE 7-like                                          |
| TCONS_00013100       | -4.46388            | -3.458              | -1.04732            | BGIOSGA009881 | XP_008681064.1ubiquitin ligase protein FANCL isoform X3                        |
| TCONS_00029723       | -4.34353            | -8.75028            | #NA                 | BGIOSGA020806 | XP_006660483.1 premnspiropodiene oxygenase-like                                |
| TCONS_00002735       | -4.30705            | #NA                 | -5.4924             | BGIOSGA002673 | NP_001304895.1ubiquitin-protein ligase/ zinc ion binding protein               |
| TCONS_00014387       | -4.27081            | -3.06207            | -3.8845             | BGIOSGA026924 | XP_006665080.1 vacuolar amino acid transporter 1-like                          |
| TCONS_00011849       | -4.2397             | -4.83368            | -2.84625            | BGIOSGA033359 | XP_006649694.1 peroxidase N-like                                               |
| TCONS_00014822       | -4.23569            | -2.83871            | -3.85615            | BGIOSGA010119 | XP_015691906.1 putative E3 ubiquitin-protein ligase LIN                        |
| TCONS_00021317       | -4.13361            | -3.71354            | #NA                 | BGIOSGA035061 | XP_006657297.1 benzyl alcohol O-benzoyltransferase-like                        |
| TCONS_00031646       | -4.10419            | -2.10109            | -2.27695            | BGIOSGA029546 | XP_015693541.1 transcription factor HBP-1b(c38)-like                           |
| TCONS_00013461       | -4.06618            | -4.64925            | 3.16856             | BGIOSGA009524 | XP_006650831.1PREDICTED: uncharacterized protein LOC102717884                  |
| TCONS_00002675       | -3.98483            | -1.57548            | -2.58624            | BGIOSGA031010 | XP_015692513.1 serine/threonine-protein kinase HT1-like                        |
| TCONS_00035952       | -3.98084            | 0.927297            | -4.18109            | BGIOSGA023600 | XP_015698288.1 AAA-ATPase At3g28580-like                                       |
| TCONS_00007572       | -3.98057            | -1.58084            | -1.85984            | BGIOSGA004032 | XP_004951512.1cytochrome P450 734A2                                            |
| TCONS_00019229       | -3.9279             | -4.52416            | -2.90053            | BGIOSGA018120 | XP_002441045.2probable membrane-associated kinase regulator 1                  |
| TCONS_00013998       | -3.92753            | -3.10893            | -4.65982            | BGIOSGA040253 | XP_006652179.1 probable aldo-keto reductase 2                                  |
| TCONS_00015157       | -3.90161            | -0.101657           | -1.50567            | #N/A          | #N/A                                                                           |
| TCONS_00031666       | -3.90111            | -2.17268            | -1.50692            | BGIOSGA022006 | XP_006662089.1 NAC domain-containing protein 48-like                           |
| TCONS_00032753       | -3.89963            | -1.68911            | -1.28819            | BGIOSGA014064 | XP_021307101.1AT-hook motif nuclear-localized protein 10-like                  |
| TCONS_00011702       | -3.89943            | -1.1748             | -0.926124           | BGIOSGA023892 | XP_015689687.1 alcohol dehydrogenase-like 2                                    |
| TCONS_00027678       | -3.85407            | -2.45653            | -3.05864            | BGIOSGA019255 | XP_004974549.2MDIS1-interacting receptor like kinase 2                         |
| TCONS_00032681       | -3.74526            | -5.17113            | -4.32558            | BGIOSGA008753 | XP_006662047.1 expansin-B3                                                     |
| TCONS_00036597       | -3.72507            | #NA                 | -1.89997            | BGIOSGA006116 | XP_015698436.1 protein DETOXIFICATION 21-like isoform X2                       |
| TCONS_00002632       | -3.71905            | -0.615471           | #NA                 | BGIOSGA025988 | XP_006654929.1PREDICTED: uncharacterized protein LOC102716972                  |
| TCONS_00037180       | -3.63275            | -1.87816            | -0.782173           | BGIOSGA017158 | XP_021301930.1putative disease resistance protein At3g14460 isoform X1         |
| TCONS_00017282       | -3.62656            | -4.20749            | -3.79786            | BGIOSGA008967 | XP_015692979.1 germin-like protein 5-1                                         |
| TCONS_00016703       | -3.57722            | #NA                 | #NA                 | BGIOSGA017524 | XP_006653807.2 agmatine coumaroyltransferase-like                              |
| TCONS_00010161       | -3.56572            | 0.478281            | 0.725572            | BGIOSGA023851 | XP_006650126.1 H/ACA ribonucleoprotein complex subunit 4                       |
| TCONS_00010918       | -3.54115            | -1.55062            | -2.03292            | BGIOSGA008673 | XP_015690458.1PREDICTED: uncharacterized protein LOC102708885                  |
| TCONS_00008756       | -3.51652            | #NA                 | -3.69878            | BGIOSGA004670 | XP_006647848.1 protein ODORANT1-like                                           |
| TCONS_00007180       | -3.51347            | 0.213568            | -0.246955           | BGIOSGA007317 | XP_015688416.1PREDICTED: uncharacterized protein LOC107303489, partial         |
| TCONS_00009831       | -3.51308            | 1.02043             | -0.899996           | BGIOSGA012383 | XP_015691048.1 RNA pseudouridine synthase 5 isoform X3                         |
| TCONS_00008220       | -3.51101            | -0.86352            | -1.90511            | BGIOSGA037995 | XP_010240404.2ent-kaur-16-ene synthase, chloroplastic isoform X2               |
| TCONS_00022721       | -3.46823            | -3.90214            | -2.41666            | BGIOSGA020730 | XP_008677918.1uncharacterized protein LOC103652737                             |
| TCONS_00031719       | -3.4575             | -4.051              | -0.12471            | BGIOSGA023614 | XP_006661598.1 peroxidase N-like                                               |
| TCONS_00023837       | -3.40994            | -2.15362            | -0.940847           | BGIOSGA021098 | XP_015694785.1 cysteine-rich receptor-like protein kinase 10                   |
| TCONS_00029983       | -3.4073             | 0.340659            | -1.98259            | BGIOSGA021589 | NP_001152046.1appr-1-p processing enzyme family protein                        |
| TCONS_00036757       | -3.4069             | -1.07485            | -0.868117           | BGIOSGA034366 | XP_015689762.1 GATA transcription factor 9-like                                |
| TCONS_00016482       | -3.40665            | #NA                 | 0.430804            | BGIOSGA005831 | XP_015691796.1PREDICTED: uncharacterized protein LOC102714284                  |
| TCONS_00004249       | -3.3976             | -1.67144            | -1.26995            | BGIOSGA025424 | XP_006644573.1 salicylate carboxymethyltransferase-like                        |
| TCONS_00037602       | -3.39642            | -3.25789            | -3.17975            | BGIOSGA026213 | XP_006664780.1 purple acid phosphatase 2-like                                  |
| TCONS_00017895       | -3.36695            | -2.96335            | -2.97723            | BGIOSGA014371 | XP_004961925.1protein TRANSPARENT TESTA 1                                      |
| TCONS_00033613       | -3.35883            | -3.95038            | -2.80963            | BGIOSGA007444 | XP_015698174.1 probable xyloglucan endotransglucosylase/hydrolase              |
| TCONS_00033999       | -3.33453            | -1.58615            | -3.13606            | BGIOSGA015557 | XP_002465636.1sugar transport protein 13                                       |
| TCONS_00029473       | -3.29964            | -3.51425            | -5.982              | BGIOSGA023639 | XP_006660948.1 HMG1/2-like protein                                             |
| TCONS_00016380       | -3.27806            | #NA                 | -3.45138            | BGIOSGA014586 | XP_006652619.2 acyl-acyl carrier protein thioesterase ATL3, chloroplastic-like |
| TCONS_00012987       | -3.277              | -0.691691           | -1.86909            | BGIOSGA004289 | XP_006650430.1 germin-like protein 3-5                                         |
| TCONS_00021455       | -3.25516            | -4.24111            | -1.86932            | BGIOSGA011754 | XP_006656549.1 probable polygalacturonase                                      |
| TCONS_00024346       | -3.20415            | -3.06861            | -2.52368            | BGIOSGA025002 | XP_006658122.1 peroxidase 70-like                                              |
| TCONS_00008598       | -3.18223            | -4.31175            | -5.27456            | BGIOSGA020501 | XP_004953478.1protein REVEILLE 2 isoform X2                                    |
| TCONS_00006492       | -3.17075            | -3.06198            | -2.92672            | BGIOSGA005099 | XP_004953169.1auxin response factor 8                                          |
| TCONS_00015171       | -3.17063            | -2.10403            | -0.431178           | BGIOSGA026369 | XP_015692307.1PREDICTED: uncharacterized protein LOC102719949 isoform X1       |

transcriptome

|                |          |     |           |             |               |                                                                          |
|----------------|----------|-----|-----------|-------------|---------------|--------------------------------------------------------------------------|
| TCONS_00006015 | -3.15819 | #NA |           | -2.2693     | BGIOSGA027160 | XP_014754387.1uncharacterized protein LOC106866147                       |
| TCONS_00001307 | -3.15298 |     | -2.70843  | -2.2824     | BGIOSGA006478 | XP_023157643.1uncharacterized LOC100279343 isoform X4                    |
| TCONS_00012006 | -3.15096 |     | -1.38869  | -3.28753    | BGIOSGA011004 | XP_003561776.1beta-glucuronosyltransferase GlcAT14B                      |
| TCONS_00006567 | -3.13646 | #NA |           | -1.51677    | BGIOSGA008735 | XP_006647619.2 probable enoyl-CoA hydratase 2, mitochondrial isoform X3  |
| TCONS_00030139 | -3.13555 |     | -1.40717  | -1.74144    | BGIOSGA030941 | XP_015696371.1 homeobox-leucine zipper protein HOX11                     |
| TCONS_00002586 | -3.13548 |     | -2.14423  | -0.452114   | BGIOSGA034953 | XP_015691116.1PREDICTED: uncharacterized protein LOC102718984            |
| TCONS_00023842 | -3.13447 |     | -1.56054  | -2.32909    | BGIOSGA018504 | XP_006658641.1 F-box protein At5g49610-like                              |
| TCONS_00022936 | -3.13437 | #NA |           | -2.32933    | BGIOSGA035990 | XP_006656508.1 GDSL esterase/lipase                                      |
| TCONS_00001843 | -3.13276 |     | -3.73261  | -2.74834    | BGIOSGA016791 | At5g55050-like isoform X2                                                |
| TCONS_00033054 | -3.11009 |     | -5.13364  | -5.26209    | BGIOSGA032523 | XP_004972181.1transcription factor PCF7                                  |
| TCONS_00012852 | -3.09955 |     | -4.10695  | -1.28857    | BGIOSGA011420 | XP_024318852.1receptor kinase-like protein Xa21 isoform X1               |
| TCONS_00015602 | -3.08251 |     | -1.63065  | -1.61453    | #N/A          | XP_006650368.1 predicted GPI-anchored protein 58                         |
| TCONS_00030510 | -3.06748 |     | -2.64762  | 0.286022    | BGIOSGA033400 | XP_006660955.1 RING-H2 finger protein ATL80-like                         |
| TCONS_00016005 | -3.03878 |     | -3.50995  | -3.03725    | BGIOSGA025519 | NP_001142653.1uncharacterized protein LOC100274938                       |
| TCONS_00022421 | -3.03315 |     | -2.89621  | -2.01157    | BGIOSGA036561 | XP_006656162.1 receptor-like protein kinase 5                            |
| TCONS_00018434 | -3.01305 |     | -2.54346  | -0.778386   | BGIOSGA005510 | XP_006649001.1 chloride channel protein CLC-f-like                       |
| TCONS_00036438 | -3.00299 |     | 0.838057  | 1.08415     | BGIOSGA035820 | XP_015698184.1PREDICTED: uncharacterized protein LOC102704106 isoform X2 |
| TCONS_00014965 | -2.98871 |     | -2.57058  | -3.16148    | BGIOSGA007393 | XP_002447115.2putative disease resistance protein RGA4 isoform X1        |
| TCONS_00014084 | -2.98871 |     | 0.599347  | 0.00844874  | #N/A          | #N/A                                                                     |
| TCONS_00018017 | -2.98863 | #NA | #NA       |             | BGIOSGA031145 | XP_004963692.1uncharacterized protein LOC101753786                       |
| TCONS_00020008 | -2.98789 |     | -2.2821   | -3.16354    | BGIOSGA022191 | XP_010228038.1uncharacterized protein LOC104581650                       |
| TCONS_00035784 | -2.98776 |     | -1.24985  | -1.16388    | BGIOSGA034127 | XP_004960738.1transcriptional coactivator YAP1                           |
| TCONS_00007820 | -2.98749 |     | -2.57211  | -4.16454    | BGIOSGA037727 | XP_015688939.1 calcineurin B-like protein 7                              |
| TCONS_00016436 | -2.98269 |     | -3.57818  | #NA         | BGIOSGA005863 | XP_024311533.1transcription factor bHLH103 isoform X3                    |
| TCONS_00030794 | -2.9819  |     | -1.03485  | -1.59352    | BGIOSGA007204 | XP_015690283.1PREDICTED: uncharacterized protein LOC102701624            |
| TCONS_00007103 | -2.95091 |     | -3.1254   | -4.0015     | BGIOSGA009284 | XP_006649167.2 carboxyl-terminal-processing peptidase 2, chloroplast     |
| TCONS_00006546 | -2.93087 |     | -3.52042  | -2.37858    | BGIOSGA037146 | XP_006648883.1 B-box zinc finger protein 20-like                         |
| TCONS_00009336 | -2.92762 |     | 0.230372  | -0.153999   | BGIOSGA022541 | XP_015690478.1 FAD-dependent urate hydroxylase-like                      |
| TCONS_00016463 | -2.92639 |     | -1.9411   | -0.541702   | BGIOSGA031495 | NP_001152262.2transferase, transferring glycosyl groups                  |
| TCONS_00028570 | -2.92089 |     | -1.66406  | -2.04192    | #N/A          | #N/A                                                                     |
| TCONS_00020300 | -2.9158  |     | -1.12005  | -2.37153    | BGIOSGA008043 | XP_006656742.2PREDICTED: uncharacterized protein LOC102709091            |
| TCONS_00005744 | -2.91222 |     | -3.49999  | -1.23113    | BGIOSGA021138 | XP_006647110.1 peroxidase P7-like                                        |
| TCONS_00025049 | -2.90443 |     | -2.89402  | -1.71694    | BGIOSGA036271 | XP_006654954.1 acetylmethine aminotransferase, mitochondrial             |
| TCONS_00015162 | -2.90265 |     | 0.567022  | 0.0606808   | BGIOSGA006939 | XP_004960085.1chaperone protein dnaJ C76, chloroplast                    |
| TCONS_00028197 | -2.87246 |     | -2.92426  | -2.68927    | BGIOSGA029665 | XP_006660223.1 homeobox-leucine zipper protein HOX20-like                |
| TCONS_00025256 | -2.86072 |     | -0.214313 | 0.151172    | BGIOSGA032318 | XP_006658649.1 cysteine-rich receptor-like protein kinase 15 isoform X1  |
| TCONS_00016684 | -2.8565  |     | -2.55505  | -1.53838    | BGIOSGA037723 | XP_014751003.1receptor-like serine/threonine-protein kinase SD1-8        |
| TCONS_00009494 | -2.85575 |     | -1.84965  | -3.76076    | BGIOSGA029806 | XP_003558594.1CASP-like protein 2U2                                      |
| TCONS_00015216 | -2.84665 |     | -4.76799  | -4.36846    | BGIOSGA037882 | XP_006653073.1PREDICTED: uncharacterized protein LOC102708432            |
| TCONS_00024498 | -2.83169 |     | -0.385808 | -1.37388    | BGIOSGA024897 | XP_006658244.1 transcription factor Maf-like                             |
| TCONS_00025835 | -2.83169 |     | -0.800845 | -1.37388    | #N/A          | #N/A                                                                     |
| TCONS_00028630 | -2.83106 |     | -3.3865   | #NA         | BGIOSGA030145 | XP_006644347.1 bidirectional sugar transporter SWEET6b                   |
| TCONS_00029037 | -2.82684 |     | 1.00121   | -1.3862     | #N/A          | #N/A                                                                     |
| TCONS_00009788 | -2.82275 |     | -0.936379 | -2.39657    | #N/A          | #N/A                                                                     |
| TCONS_00009175 | -2.81993 |     | -2.39923  | -0.988667   | BGIOSGA040603 | XP_004986011.1uncharacterized protein LOC101778132                       |
| TCONS_00035732 | -2.81585 | #NA |           | -1.41395    | BGIOSGA037216 | XP_006663908.1 MADS-box transcription factor 13-like                     |
| TCONS_00027250 | -2.81572 |     | -1.81956  | -0.999237   | BGIOSGA032471 | XP_006659767.2 exosome complex component RRP41-like                      |
| TCONS_00002178 | -2.81547 |     | -1.81987  | -0.3369     | BGIOSGA033298 | XP_006645026.1 steroid 5-alpha-reductase DET2                            |
| TCONS_00015391 | -2.81523 |     | -2.40514  | -1.00046    | BGIOSGA026343 | XP_004975524.1momilactone A synthase                                     |
| TCONS_00020423 | -2.81501 |     | -0.820456 | -0.00101326 | BGIOSGA003753 | XP_006656833.1 protein NRT1/ PTR FAMILY 5.8                              |
| TCONS_00004127 | -2.8148  |     | 3.19423   | #NA         | BGIOSGA026297 | XP_003566966.2lipid phosphate phosphatase 2                              |
| TCONS_00026591 | -2.81127 |     | -1.60277  | -0.0102947  | BGIOSGA022575 | XP_006659390.1PREDICTED: uncharacterized protein LOC102703053            |
| TCONS_00019583 | -2.79138 |     | -3.18378  | -2.60653    | BGIOSGA020095 | XP_006654583.1 cyclin-B1-5 isoform X2                                    |
| TCONS_00024147 | -2.76566 |     | -4.91442  | -3.49415    | BGIOSGA002711 | XP_006645789.1 peroxidase 2-like                                         |
| TCONS_00034787 | -2.76554 |     | -5.36424  | -2.37936    | BGIOSGA025744 | XP_006663415.1 probable apyrase 3                                        |
| TCONS_00013799 | -2.76058 |     | -1.42802  | -0.92945    | BGIOSGA033262 | XP_015697480.1 probable methyltransferase PMT21                          |



transcriptome

|                |          |           |             |               |                                                                                 |
|----------------|----------|-----------|-------------|---------------|---------------------------------------------------------------------------------|
| TCONS_00038361 | -2.76016 | #NA       | -1.92315    | BGIOSGA031454 | XP_006663501.1 UPF0481 protein At3g47200-like                                   |
| TCONS_00032127 | -2.75707 | 0.567248  | -1.70854    | BGIOSGA032010 | XP_015697260.1 PREDICTED: uncharacterized protein LOC102703899                  |
| TCONS_00002112 | -2.75107 | -0.844719 | -1.53089    | BGIOSGA034074 | XP_006646452.1 flavonol synthase/flavanone 3-hydroxylase                        |
| TCONS_00020662 | -2.74553 | -1.96341  | 0.321523    | #N/A          | #N/A                                                                            |
| TCONS_00036568 | -2.74302 | -5.21891  | -2.82045    | BGIOSGA034766 | XP_006663751.1 BTB/POZ domain-containing protein At3g08570-like                 |
| TCONS_00023035 | -2.73974 | 0.19544   | -1.85917    | BGIOSGA025060 | XP_024313239.1 uncharacterized protein LOC100833640 isoform X1                  |
| TCONS_00024436 | -2.73342 | -1.49158  | -1.42282    | BGIOSGA008476 | XP_015695169.1 sugar carrier protein C-like                                     |
| TCONS_00011406 | -2.73268 | -2.29918  | -3.88072    | BGIOSGA024937 | XP_006650630.1 probable protein phosphatase 2C 34                               |
| TCONS_00019325 | -2.71984 | -1.50755  | -2.17607    | BGIOSGA017999 | XP_003568417.1 probable magnesium transporter NIP44                             |
| TCONS_00018234 | -2.71856 | -0.509167 | -0.456774   | BGIOSGA012123 | XP_006655543.1 probable polygalacturonase At1g80170 isoform X1                  |
| TCONS_00016583 | -2.71435 | -4.52344  | -1.68434    | BGIOSGA020893 | XP_006652790.1 galacturonokinase isoform X1                                     |
| TCONS_00017233 | -2.7109  | -1.6349   | -0.240679   | BGIOSGA001680 | XP_004960839.1 uncharacterized protein LOC101764560                             |
| TCONS_00005586 | -2.69856 | -2.61988  | -1.5199     | BGIOSGA013063 | XP_006647016.1 premnaspirodien oxygenase-like                                   |
| TCONS_00012851 | -2.68834 | -4.86629  | -2.46328    | BGIOSGA027900 | XP_004982264.1 inactive protein RESTRICTED TEV MOVEMENT 2                       |
| TCONS_00019277 | -2.68032 | -3.97046  | -3.49964    | BGIOSGA002103 | XP_015692597.1 PREDICTED: uncharacterized protein LOC102712817                  |
| TCONS_00032780 | -2.68017 | -6.5987   | -4.19765    | BGIOSGA031330 | XP_021306528.1 uncharacterized protein LOC110431640                             |
| TCONS_00004257 | -2.67285 | 0.228275  | 0.094848    | BGIOSGA027387 | XP_006659240.1 (DL)-glycerol-3-phosphatase 2 isoform X2                         |
| TCONS_00004822 | -2.66942 | -3.2679   | -1.86786    | BGIOSGA019901 | XP_006645115.1 amino acid permease 8-like                                       |
| TCONS_00038358 | -2.66929 | -6.42546  | -4.43382    | BGIOSGA028484 | XP_006663501.1 UPF0481 protein At3g47200-like                                   |
| TCONS_00009670 | -2.66798 | -6.26971  | -5.87143    | BGIOSGA002447 | XP_006649724.1 exoglucanase/xylanase-like isoform X2                            |
| TCONS_00019551 | -2.66187 | -1.48932  | -3.58881    | BGIOSGA017781 | XP_015692962.1 fruit bromelain-like                                             |
| TCONS_00024350 | -2.65886 | -2.72942  | -1.17818    | BGIOSGA019131 | XP_006658126.1 peroxidase 2-like                                                |
| TCONS_00033263 | -2.65263 | -1.37689  | -2.62906    | BGIOSGA035087 | XP_015697624.1 PREDICTED: uncharacterized protein LOC102714050                  |
| TCONS_00003214 | -2.64093 | -0.942856 | -1.90757    | BGIOSGA019094 | XP_006643989.2 receptor-like serine/threonine-protein kinase At1g78530          |
| TCONS_00011937 | -2.64087 | -2.24081  | -0.0114848  | BGIOSGA011076 | XP_015689837.1 PREDICTED: uncharacterized protein LOC102700976                  |
| TCONS_00000728 | -2.64079 | -1.60634  | -2.76181    | BGIOSGA035839 | NP_001150894.1 ethylene-responsive transcription factor 3                       |
| TCONS_00024394 | -2.63722 | -2.19514  | -0.448931   | #N/A          | #N/A                                                                            |
| TCONS_00017627 | -2.63586 | -3.19662  | #NA         | BGIOSGA016787 | XP_015693111.1 protein DEHYDRATION-INDUCED 19 homolog 2 isoform X1              |
| TCONS_00024629 | -2.63442 | 0.502231  | 0.543981    | BGIOSGA017041 | XP_015688878.1 altered inheritance of mitochondria protein 21-like              |
| TCONS_00003065 | -2.62868 | -4.30724  | -2.03384    | BGIOSGA021625 | XP_006645620.1 peptide-N4-(N-acetyl-beta-glucosaminyl)asparagine amidase A-like |
| TCONS_00032781 | -2.62855 | -6.02352  | -4.45901    | BGIOSGA001542 | XP_006645936.2 plastidial glycolate/glycerate translocator 1, chloroplastic     |
| TCONS_00012409 | -2.62844 | -0.205165 | -2.7931     | #N/A          | #N/A                                                                            |
| TCONS_00023133 | -2.62748 | -1.62138  | -0.795527   | BGIOSGA025505 | XP_004985801.1 probable disease resistance protein At5g45440                    |
| TCONS_00004429 | -2.62664 | 0.493058  | -0.475714   | BGIOSGA031189 | XP_004970017.1 dof zinc finger protein 5                                        |
| TCONS_00021354 | -2.6263  | -1.62284  | #NA         | BGIOSGA031164 | XP_006657326.1 peptidyl-prolyl cis-trans isomerase CYP20-1-like                 |
| TCONS_00040070 | -2.62339 | -2.62651  | -1.48388    | BGIOSGA010437 | XP_013443683.1 DNA-directed RNA polymerase subunit beta                         |
| TCONS_00026168 | -2.62244 | -0.627718 | -0.808186   | BGIOSGA008320 | XP_020422962.1 putative E3 ubiquitin-protein ligase LIN-1                       |
| TCONS_00025368 | -2.62086 | -2.21468  | -0.642202   | BGIOSGA019008 | XP_006657860.1 polygalacturonase inhibitor 1                                    |
| TCONS_00025219 | -2.62019 | -1.63055  | #NA         | BGIOSGA030219 | XP_006657778.1 WAT1-related protein At5g64700-like                              |
| TCONS_00020891 | -2.61983 | 0.105953  | 0.272783    | BGIOSGA019324 | XP_006657059.1 diacylglycerol O-acyltransferase 1-like                          |
| TCONS_00006111 | -2.61905 | -1.63199  | -3.49468    | BGIOSGA007691 | XP_003571092.1 isoflavone 2'-hydroxylase                                        |
| TCONS_00012311 | -2.61882 | -1.89532  | -0.817183   | BGIOSGA010686 | XP_006651406.1 sugar transporter ERD6-like 16                                   |
| TCONS_00028029 | -2.60797 | -1.74982  | -2.03786    | BGIOSGA003185 | XP_015688191.1 mediator-associated protein 2                                    |
| TCONS_00037603 | -2.59789 | -4.1967   | -3.79684    | BGIOSGA036998 | XP_021301884.1 purple acid phosphatase 2-like                                   |
| TCONS_00024348 | -2.59159 | -0.745475 | -2.23398    | BGIOSGA001846 | XP_006658124.1 peroxidase 2-like                                                |
| TCONS_00024632 | -2.59146 | -1.36579  | -4.3489     | #N/A          | #N/A                                                                            |
| TCONS_00009254 | -2.58626 | -3.62445  | -1.35887    | BGIOSGA011784 | XP_002468563.2 LOW QUALITY PROTEIN: uncharacterized protein LOC8057414          |
| TCONS_00014957 | -2.58085 | -1.4925   | -1.00026    | BGIOSGA018909 | XP_015691578.1 BAG family molecular chaperone regulator 1-like                  |
| TCONS_00014713 | -2.56796 | -5.16276  | -0.853845   | BGIOSGA016887 | XP_006653652.1 malate dehydrogenase, cytoplasmic-like                           |
| TCONS_00024347 | -2.5653  | -0.219443 | -1.41387    | BGIOSGA025002 | XP_006658123.1 peroxidase 2-like                                                |
| TCONS_00019155 | -2.56498 | -4.57255  | -2.44095    | #N/A          | #N/A                                                                            |
| TCONS_00023952 | -2.56359 | 0.0940772 | 0.291319    | BGIOSGA005847 | XP_006657872.1 40S ribosomal protein S13-2-like                                 |
| TCONS_00004764 | -2.5587  | -2.05759  | -0.610221   | BGIOSGA008303 | XP_015698161.1 transcription factor TGA2-like isoform X1                        |
| TCONS_00005067 | -2.55383 | -2.20914  | -2.64574    | BGIOSGA016634 | XP_010240573.2 uncharacterized protein LOC100832609 isoform X2                  |
| TCONS_00025218 | -2.54933 | -1.14572  | -0.00759874 | BGIOSGA002865 | XP_014751275.1 glucose-6-phosphate/phosphate translocator 2, chloroplastic      |

transcriptome

|                |          |           |             |               |                                                                                                                           |
|----------------|----------|-----------|-------------|---------------|---------------------------------------------------------------------------------------------------------------------------|
| TCONS_00017326 | -2.54081 | -1.74369  | -0.00628372 | BGIOSGA004116 | XP_006654152.1 GDSL esterase/lipase At5g45910-like                                                                        |
| TCONS_00029369 | -2.53715 | -1.08092  | -0.646699   | BGIOSGA031124 | XP_006661461.1 RNA-binding protein 1-like XP_006644379.1 mitogen-activated protein kinase kinase kinase 7                 |
| TCONS_00004005 | -2.53241 | -0.134261 | -0.970502   | BGIOSGA014947 |                                                                                                                           |
| TCONS_00007976 | -2.53118 | 0.965792  | -0.480271   | BGIOSGA006507 | XP_003574949.17-dehydrocholesterol reductase XP_006648811.2PREDICTED: uncharacterized protein LOC102699290                |
| TCONS_00003117 | -2.52538 | -3.9691   | -1.64158    | BGIOSGA022347 | XP_006659231.1 xyloglucan endotransglucosylase/hydrolase protein 24-like XP_004969731.2wall-associated receptor kinase 3  |
| TCONS_00026182 | -2.51524 | #NA       | #NA         | BGIOSGA017422 |                                                                                                                           |
| TCONS_00027907 | -2.5137  | -2.52311  | #NA         | BGIOSGA007130 | XP_002453775.1microtubule-associated serine/threonine-protein kinase 3 XP_022680515.1transcription factor PIF4 isoform X1 |
| TCONS_00007967 | -2.5122  | -4.10995  | -2.12456    | BGIOSGA006514 |                                                                                                                           |
| TCONS_00036408 | -2.51182 | -0.940509 | 0.537458    | BGIOSGA027304 |                                                                                                                           |
| TCONS_00025242 | -2.51051 | -1.52712  | -2.71371    | BGIOSGA025858 | XP_003561395.1ankyrin repeat-containing protein At5g02620 XP_006662549.1 BEL1-like homeodomain protein 4                  |
| TCONS_00004701 | -2.50143 | -2.85963  | -1.45998    | BGIOSGA028723 | XP_015693578.1PREDICTED: uncharacterized protein LOC102721655                                                             |
| TCONS_00028671 | -2.50117 | -4.01243  | -3.35784    | BGIOSGA015952 | XP_004983421.1disease resistance protein RGA2                                                                             |
| TCONS_00031800 | -2.48939 | -5.41007  | -5.01018    | BGIOSGA032490 |                                                                                                                           |
| TCONS_00021399 | -2.47666 | -2.07005  | #NA         | BGIOSGA006856 | XP_015693904.1 transcription factor bHLH93-like                                                                           |
| TCONS_00021494 | -2.47595 | -1.6559   | -0.932044   | BGIOSGA013307 | XP_006655725.1 growth-regulating factor 5 XP_006644874.2 transcription factor HBP-1b(c1)-like isoform X2                  |
| TCONS_00004590 | -2.47433 | -0.783478 | -1.75551    | BGIOSGA010850 | XP_021319199.1uncharacterized protein LOC8086457                                                                          |
| TCONS_00002387 | -2.46823 | -0.902145 | -0.831696   | BGIOSGA005022 | XP_004953005.1ankyrin repeat and death domain-containing protein 1A                                                       |
| TCONS_00029416 | -2.46303 | -1.91072  | -0.844706   | BGIOSGA019564 | XP_006656833.1 protein NRT1/ PTR FAMILY 5.8                                                                               |
| TCONS_00021954 | -2.45558 | -1.59398  | -2.06806    | BGIOSGA004890 | XP_006654334.1 AB hydrolase superfamily protein YfhM-like                                                                 |
| TCONS_00031401 | -2.45491 | -4.4693   | -3.48478    | BGIOSGA031614 |                                                                                                                           |
| TCONS_00007948 | -2.45111 | -1.92899  | -1.45894    | #N/A          | #N/A                                                                                                                      |
| TCONS_00001251 | -2.44332 | -1.11668  | -1.38008    | BGIOSGA015659 | XP_006644329.1 aldehyde dehydrogenase family 2 member C4-like                                                             |
| TCONS_00004588 | -2.44279 | -1.35552  | -0.894224   | #N/A          | #N/A                                                                                                                      |
| TCONS_00008741 | -2.44253 | -2.55823  | -2.64505    | BGIOSGA000823 | XP_006647834.1 protein NSP-INTERACTING KINASE 1                                                                           |
| TCONS_00016273 | -2.4413  | -2.64123  | -5.64521    | BGIOSGA006001 | XP_015691636.1 phenylalanine ammonia-lyase isoform X1                                                                     |
| TCONS_00004343 | -2.44073 | -1.35823  | -0.484224   | BGIOSGA013602 | XP_002443431.1metal transporter Nramp6 XP_015693538.1 zinc finger protein CONSTANS-LIKE 16-like                           |
| TCONS_00020485 | -2.43772 | -2.53152  | -0.750345   | BGIOSGA035939 | XP_006660759.1PREDICTED: uncharacterized protein LOC102707798                                                             |
| TCONS_00029252 | -2.43682 | -1.37032  | -2.8952     | BGIOSGA038518 | XP_015696397.1 3-hydroxy-3-methylglutaryl-coenzyme A reductase 3-like                                                     |
| TCONS_00029270 | -2.43647 | -0.531235 | -0.130544   | BGIOSGA005742 | XP_002438552.1heat stress transcription factor C-2b isoform X2                                                            |
| TCONS_00022408 | -2.43396 | -1.18778  | -3.42719    | BGIOSGA020790 |                                                                                                                           |
| TCONS_00026324 | -2.43072 | -2.37054  | -1.33891    | #N/A          | #N/A                                                                                                                      |
| TCONS_00032374 | -2.42937 | -2.95705  | #NA         | BGIOSGA007933 | XP_006651385.1PREDICTED: uncharacterized protein LOC102702181                                                             |
| TCONS_00003634 | -2.42872 | -1.95779  | -2.51379    | #N/A          | #N/A                                                                                                                      |
| TCONS_00002217 | -2.42123 | -0.380951 | 0.052627    | #N/A          | #N/A                                                                                                                      |
| TCONS_00002676 | -2.41995 | -0.645333 | #NA         | BGIOSGA016294 | XP_024317253.1uncharacterized protein LOC106866428                                                                        |
| TCONS_00007198 | -2.41756 | -3.82692  | -1.55431    | BGIOSGA020632 | XP_004951198.1trihelix transcription factor GTL1-like                                                                     |
| TCONS_00012721 | -2.41633 | -0.649191 | -0.544631   | #N/A          | #N/A                                                                                                                      |
| TCONS_00014712 | -2.41523 | -3.14166  | -2.50191    | BGIOSGA016886 | XP_006652609.1 carotenoid cleavage dioxygenase 7, chloroplastic                                                           |
| TCONS_00002839 | -2.41116 | 0.345139  | 0.2496      | BGIOSGA001568 | XP_006643766.1 histone H2B.5                                                                                              |
| TCONS_00013767 | -2.41017 | -2.97791  | -2.56026    | #N/A          | #N/A                                                                                                                      |
| TCONS_00004951 | -2.4091  | -0.65721  | -1.56297    | BGIOSGA031010 | XP_004971023.228 kDa ribonucleoprotein, chloroplastic                                                                     |
| TCONS_00027016 | -2.40861 | #NA       | #NA         | BGIOSGA029066 | XP_003572457.2CASP-like protein UU1 XP_015692154.1 putative glycerol-3-phosphate transporter 1                            |
| TCONS_00016387 | -2.40613 | -2.53519  | -1.32677    | BGIOSGA028016 | XP_006646830.1 ADP-ribosylation factor-like isoform X1                                                                    |
| TCONS_00005342 | -2.40572 | 0.386052  | -0.456077   | BGIOSGA022179 |                                                                                                                           |
| TCONS_00033005 | -2.40519 | -3.98383  | -3.57288    | #N/A          | #N/A                                                                                                                      |
| TCONS_00026997 | -2.40495 | -4.51507  | -3.20217    | BGIOSGA035957 | XP_015695928.1 nucleotide pyrophosphatase/phosphodiesterase-like                                                          |
| TCONS_00004263 | -2.40351 | -2.24894  | -2.16207    | BGIOSGA020288 | XP_015695521.1 jacalin-related lectin 19 XP_006650322.1 auxin-responsive protein IAA12-like                               |
| TCONS_00010566 | -2.40259 | -1.98707  | -0.994457   | BGIOSGA023196 | XP_020397541.1probable E3 ubiquitin-protein ligase ATL44                                                                  |
| TCONS_00031590 | -2.40247 | -2.98723  | -2.57974    | BGIOSGA028804 | XP_003562289.1LOB domain-containing protein 37                                                                            |
| TCONS_00012709 | -2.4021  | -0.987691 | -0.995699   | BGIOSGA002703 |                                                                                                                           |
| TCONS_00030438 | -2.40082 | -1.98931  | 0.638521    | BGIOSGA029364 | XP_006660899.1 ribonuclease 1-like                                                                                        |
| TCONS_00030680 | -2.39858 | 1.56245   | -0.00447635 | BGIOSGA009637 | XP_006650706.1 probable aldehyde oxidase 2 XP_015693145.1PREDICTED: uncharacterized protein LOC102714924                  |
| TCONS_00018356 | -2.39755 | -1.40847  | -2.00704    | BGIOSGA020408 | XP_021312803.1protein PIN-LIKES 6                                                                                         |
| TCONS_00019509 | -2.39673 | #NA       | -1.59405    | BGIOSGA017849 | XP_006651215.1PREDICTED: uncharacterized protein LOC102719475                                                             |
| TCONS_00037734 | -2.3964  | 0.0640131 | -1.59484    | BGIOSGA012231 |                                                                                                                           |
| TCONS_00006714 | -2.39634 | -1.29452  | -3.59499    | BGIOSGA029635 | XP_006647755.1 abscisic acid 8'-hydroxylase 1                                                                             |

transcriptome

|                |          |           |           |               |                                                                                                                                                                    |
|----------------|----------|-----------|-----------|---------------|--------------------------------------------------------------------------------------------------------------------------------------------------------------------|
| TCONS_00023031 | -2.39601 | -2.50995  | -2.59581  | BGIOSGA015758 | XP_006658235.1PREDICTED: uncharacterized protein LOC102720064<br>XP_015695954.1 probable WRKY transcription factor 2                                               |
| TCONS_00028246 | -2.3888  | -3.57517  | -1.19809  | BGIOSGA027300 | #N/A                                                                                                                                                               |
| TCONS_00001001 | -2.35812 | #NA       | -2.51932  | #N/A          | #N/A                                                                                                                                                               |
| TCONS_00016501 | -2.35699 | -2.20707  | -1.83416  | BGIOSGA005820 | XP_004976616.1 uncharacterized protein LOC101776420<br>XP_015692924.1 protein NUCLEAR FUSION DEFECTIVE 4-like                                                      |
| TCONS_00017995 | -2.34881 | -3.69812  | -1.83468  | BGIOSGA036092 |                                                                                                                                                                    |
| TCONS_00032969 | -2.34591 | -5.26988  | -4.87176  | BGIOSGA035372 | XP_015691642.1 subtilisin-like protease SBT3.9<br>XP_014752011.1 uncharacterized protein LOC100839147<br>XP_015689817.1 heat stress transcription factor C-1b-like |
| TCONS_00010643 | -2.34041 | 1.37713   | 0.906286  | BGIOSGA035696 |                                                                                                                                                                    |
| TCONS_00001765 | -2.33984 | -0.120026 | 1.17902   | BGIOSGA012151 |                                                                                                                                                                    |
| TCONS_00007545 | -2.33798 | -0.80816  | -2.43589  | BGIOSGA017986 | XP_006648425.2 subtilisin-like protease SBT5.3<br>XP_006654542.1 expansin-A4                                                                                       |
| TCONS_00019489 | -2.33105 | -1.55557  | -1.85985  | BGIOSGA016990 | XP_006647067.2 probable LRR receptor-like serine/threonine-protein kinase At3g47570                                                                                |
| TCONS_00005242 | -2.32841 | -1.51727  | -1.68718  | BGIOSGA035593 | #N/A                                                                                                                                                               |
| TCONS_00015348 | -2.32068 | -1.68152  | -2.08054  | #N/A          | #N/A                                                                                                                                                               |
| TCONS_00029376 | -2.31882 | -2.53702  | -2.50023  | BGIOSGA008976 | XP_006660877.1 homeobox-leucine zipper protein HOX6-like                                                                                                           |
| TCONS_00008679 | -2.31882 | -2.61675  | -2.0852   | BGIOSGA009062 | XP_003572869.1 basic proline-rich protein XP_006663160.1 probable WRKY transcription factor 70                                                                     |
| TCONS_00034176 | -2.3163  | -4.49442  | -4.09151  | BGIOSGA004404 | #N/A                                                                                                                                                               |
| TCONS_00013195 | -2.31494 | -2.91116  | -1.5099   | #N/A          | #N/A                                                                                                                                                               |
| TCONS_00016489 | -2.31493 | -0.138591 | -2.28755  | BGIOSGA012269 | XP_006652698.1 probable protein phosphatase 2C 43                                                                                                                  |
| TCONS_00021613 | -2.31365 | 0.456454  | -0.51309  | BGIOSGA008180 | XP_006663628.2 glutathione synthetase, chloroplastic-like<br>XP_015698837.1 2-alkenal reductase (NADP(+)-dependent)-like                                           |
| TCONS_00035765 | -2.31227 | -3.6135   | -4.77852  | BGIOSGA037174 | XP_015694868.1 temperature-sensitive sn-2 acyl-lipid omega-3 desaturase (ferredoxin), chloroplastic-like                                                           |
| TCONS_00024409 | -2.31031 | -3.42197  | -3.50661  | BGIOSGA024410 | XP_006649531.1 alcohol dehydrogenase-like 7                                                                                                                        |
| TCONS_00011701 | -2.30958 | -3.07181  | -1.99601  | BGIOSGA034308 | XP_006644934.1 probable WRKY transcription factor 33                                                                                                               |
| TCONS_00002094 | -2.30711 | 0.435099  | -1.92321  | BGIOSGA017481 | XP_006656281.1 serine/threonine-protein kinase HT1                                                                                                                 |
| TCONS_00021101 | -2.30693 | -1.15375  | -0.502842 | BGIOSGA010162 | XP_015692517.1 probable aquaporin TIP4-1                                                                                                                           |
| TCONS_00017369 | -2.30273 | -3.47534  | -2.21146  | BGIOSGA016519 | XP_006660583.1 ASC1-like protein 1                                                                                                                                 |
| TCONS_00028899 | -2.29963 | -1.89187  | -0.640458 | BGIOSGA003396 | XP_004956981.11-aminocyclopropane-1-carboxylate oxidase 1                                                                                                          |
| TCONS_00029130 | -2.29917 | -4.21437  | -2.4896   | BGIOSGA025001 | XP_004982999.1 putative RING-type E3 ubiquitin transferase C3H69                                                                                                   |
| TCONS_00032312 | -2.29013 | -1.97952  | -0.100628 | BGIOSGA017361 | XP_006645353.1 cationic peroxidase SPC4-like                                                                                                                       |
| TCONS_00002590 | -2.28247 | -1.18558  | -0.783652 | BGIOSGA012710 | XP_006655897.1 PREDICTED: uncharacterized protein LOC102711892                                                                                                     |
| TCONS_00020322 | -2.28204 | -1.27045  | -2.44133  | BGIOSGA003758 | XP_004983363.1 small heat shock protein, chloroplastic                                                                                                             |
| TCONS_00031869 | -2.27936 | #NA       | -0.747659 | BGIOSGA032265 | XP_015695744.1 PREDICTED: uncharacterized protein LOC102716894                                                                                                     |
| TCONS_00027115 | -2.2789  | -1.53731  | -1.86431  | BGIOSGA029138 | XP_021320517.1 G-type lectin S-receptor-like serine/threonine-protein kinase SD2-5                                                                                 |
| TCONS_00015584 | -2.27669 | -1.86201  | -1.86987  | BGIOSGA015384 | XP_015697111.1 serine carboxypeptidase-like 13 isoform X2                                                                                                          |
| TCONS_00033923 | -2.27507 | -2.86406  | -1.87392  | BGIOSGA019098 | XP_006644401.1 PLASMODESMATA CALLOSE-BINDING PROTEIN 3-like                                                                                                        |
| TCONS_00001417 | -2.27441 | #NA       | -2.13861  | BGIOSGA001389 | XP_006659607.2 RNA pseudouridine synthase 3, mitochondrial                                                                                                         |
| TCONS_00030318 | -2.27375 | -4.18765  | -2.97674  | BGIOSGA003901 | XP_006651634.1 probable cyclic nucleotide-gated ion channel 6                                                                                                      |
| TCONS_00010598 | -2.27341 | #NA       | -0.878054 | BGIOSGA037369 | XP_006645753.1 cationic peroxidase 1 isoform X1                                                                                                                    |
| TCONS_00000648 | -2.27313 | -2.28155  | -0.141797 | BGIOSGA014042 | XP_003575299.1 serine/threonine-protein phosphatase 6 regulatory ankyrin repeat subunit A                                                                          |
| TCONS_00026488 | -2.27202 | -1.54598  | -0.881507 | BGIOSGA030501 | XP_003569894.1 uncharacterized protein LOC100835106                                                                                                                |
| TCONS_00002962 | -2.27183 | -1.0608   | -1.14503  | BGIOSGA020673 | XP_021302227.1 putative F-box/FBD/LRR-repeat protein At4g03220 isoform X1                                                                                          |
| TCONS_00029309 | -2.27164 | -2.28342  | -3.4674   | BGIOSGA029487 | XP_022680207.1 uncharacterized protein LOC101754764 isoform X2                                                                                                     |
| TCONS_00005291 | -2.27109 | 0.52324   | -1.66142  | BGIOSGA036416 | XP_006656970.2 pentatricopeptide repeat-containing protein At2g03880, mitochondrial                                                                                |
| TCONS_00020708 | -2.27029 | -1.06273  | -0.532152 | BGIOSGA001307 | XP_004969140.1 uncharacterized protein LOC101755969                                                                                                                |
| TCONS_00001341 | -2.26135 | -2.48732  | -1.71778  | BGIOSGA025370 | XP_006664181.1 NAC domain-containing protein 21/22-like                                                                                                            |
| TCONS_00036412 | -2.26089 | -1.67045  | 0.065446  | BGIOSGA018909 | XP_006657289.1 xyloglucan endotransglucosylase/hydrolase protein 22-like                                                                                           |
| TCONS_00021304 | -2.24769 | -4.74562  | -3.17163  | BGIOSGA011721 | XP_006656422.2 peroxidase 16-like                                                                                                                                  |
| TCONS_00021300 | -2.24635 | -3.42539  | -1.39071  | BGIOSGA011559 | XP_024315516.1 G-type lectin S-receptor-like serine/threonine-protein kinase At2g19130                                                                             |
| TCONS_00004799 | -2.2458  | -0.80638  | -1.40845  | BGIOSGA026913 | XP_015697712.1 probable plastid-lipid-associated protein 6, chloroplastic                                                                                          |
| TCONS_00019024 | -2.23878 | -3.17707  | -3.31444  | BGIOSGA018337 | XP_006656033.1 zinc finger protein CONSTANS-LIKE 9-like isoform X1                                                                                                 |
| TCONS_00022105 | -2.23757 | -0.465586 | -1.82029  | BGIOSGA037096 | XP_008659608.1 heavy metal-associated isoprenylated plant protein 29 isoform X1                                                                                    |
| TCONS_00022379 | -2.23648 | -0.490491 | -1.98485  | BGIOSGA000795 | XP_006652690.1 protein DOWNY MILDEW RESISTANCE 6-like                                                                                                              |
| TCONS_00014810 | -2.2359  | -0.813122 | -1.40135  | BGIOSGA004933 | XP_003574615.1 tuliposide A-converting enzyme 1, chloroplastic                                                                                                     |
| TCONS_00026784 | -2.22866 | -0.159247 | -3.00448  | BGIOSGA023824 |                                                                                                                                                                    |

transcriptome

|                |          |           |            |                |                                                                                                    |
|----------------|----------|-----------|------------|----------------|----------------------------------------------------------------------------------------------------|
| TCONS_00031324 | -2.22528 | -3.80602  | -2.71821   | BGIOSGA020284  | XP_015697118.1 probable cytokinin riboside 5'-monophosphate phosphoribohydrolase LOGL10 isoform X2 |
| TCONS_00008753 | -2.21756 | -3.79402  | -0.755022  | BGIOSGA005679  | XP_006647844.2PREDICTED: uncharacterized protein LOC102711043                                      |
| TCONS_00039308 | -2.2167  | -4.13876  | -3.41769   | BGIOSGA0039534 | XP_012849888.1 retrovirus-related Pol polyprotein from transposon TNT 1-94                         |
| TCONS_00025444 | -2.21307 | -3.61996  | -2.41313   | BGIOSGA040479  | NP_001169643.1uncharacterized LOC100383524                                                         |
| TCONS_00031692 | -2.21274 | -0.526002 | -2.22223   | BGIOSGA037904  | XP_006662114.1 urea-proton symporter DUR3                                                          |
| TCONS_00005484 | -2.21203 | -0.25657  | 0.923921   | BGIOSGA007596  | XP_006657576.1PREDICTED: uncharacterized protein LOC102720614                                      |
| TCONS_00020407 | -2.20953 | -2.99572  | -1.51656   | #N/A           | #N/A                                                                                               |
| TCONS_00014772 | -2.20297 | 0.196773  | -0.0118298 | BGIOSGA037563  | XP_006652664.1 protein DETOXIFICATION 49-like                                                      |
| TCONS_00019050 | -2.20195 | -2.06754  | -2.66969   | BGIOSGA022831  | XP_004962463.1receptor-like protein kinase FERONIA                                                 |
| TCONS_00012854 | -2.20174 | 0.909478  | -0.0148567 | BGIOSGA027267  | XP_003570737.1U-box domain-containing protein 44                                                   |
| TCONS_00036563 | -2.19843 | -4.37661  | -5.5587    | BGIOSGA004404  | XP_006663160.1 probable WRKY transcription factor 70                                               |
| TCONS_00016964 | -2.19692 | -1.39972  | -1.43021   | BGIOSGA018109  | XP_015692771.1 serine/arginine-rich splicing factor SR45-like                                      |
| TCONS_00034181 | -2.19188 | -5.49366  | -2.80975   | BGIOSGA027213  | XP_006663751.1 BTB/POZ domain-containing protein At3g08570-like                                    |
| TCONS_00023843 | -2.18839 | -1.65289  | -1.90682   | BGIOSGA015857  | XP_015694662.1 putative cysteine-rich receptor-like protein kinase 20                              |
| TCONS_00013643 | -2.18807 | -1.66596  | -1.61094   | BGIOSGA015791  | XP_015692110.1PREDICTED: uncharacterized protein LOC102711421                                      |
| TCONS_00017722 | -2.1868  | -4.92979  | -1.57691   | BGIOSGA007571  | XP_014660343.1UDP-D-xylose:L-fucose alpha-1,3-D-xylosyltransferase MGP4                            |
| TCONS_00016965 | -2.18482 | -3.54564  | -4.46581   | BGIOSGA007304  | XP_015692446.1 WAT1-related protein At5g64700-like                                                 |
| TCONS_00010423 | -2.17714 | -3.99696  | -1.42065   | BGIOSGA013019  | XP_006650273.1 formimidoyltransferase-cyclodeaminase-like isoform X2                               |
| TCONS_00013198 | -2.17485 | -2.68381  | 1.09374    | BGIOSGA024956  | XP_006650608.1 60S ribosomal protein L13a-4                                                        |
| TCONS_00031321 | -2.17485 | 0.316188  | 0.274313   | BGIOSGA025556  | XP_002467074.2uncharacterized protein LOC8067412                                                   |
| TCONS_00022660 | -2.16633 | -0.694016 | 0.0727825  | #N/A           | #N/A                                                                                               |
| TCONS_00002435 | -2.16592 | -2.98239  | -2.01889   | BGIOSGA016097  | XP_002456862.1uncharacterized protein LOC8079809                                                   |
| TCONS_00022399 | -2.16505 | 0.76397   | -1.25232   | #N/A           | #N/A                                                                                               |
| TCONS_00029280 | -2.16398 | -2.49482  | -2.0334    | BGIOSGA008063  | NP_001151333.1protein brittle-1                                                                    |
| TCONS_00014354 | -2.16211 | -2.34071  | -1.59653   | BGIOSGA009886  | XP_006652346.1 7-deoxyloganetin glucosyltransferase-like                                           |
| TCONS_00006544 | -2.16032 | -1.04615  | -1.11444   | BGIOSGA037060  | XP_015688677.1 GATA transcription factor 5-like                                                    |
| TCONS_00032595 | -2.15819 | 1.13842   | 0.605168   | BGIOSGA034536  | XP_006662532.1 cytochrome P450 704C1-like                                                          |
| TCONS_00014954 | -2.15455 | -3.9738   | -2.83593   | BGIOSGA035533  | XP_015692132.1 F-box/kelch-repeat protein At5g60570-like                                           |
| TCONS_00002034 | -2.15362 | 0.099619  | -1.28077   | BGIOSGA004667  | NP_001149605.1serine-type endopeptidase inhibitor precursor                                        |
| TCONS_00031966 | -2.15268 | 2.19813   | 0.301779   | BGIOSGA032181  | XP_015697115.1 uncharacterized calcium-binding protein At1g02270                                   |
| TCONS_00011725 | -2.15179 | -0.709717 | -0.285432  | BGIOSGA009517  | XP_002465702.1uncharacterized protein LOC8054253                                                   |
| TCONS_00004098 | -2.15179 | -2.12475  | -0.115507  | #N/A           | #N/A                                                                                               |
| TCONS_00032895 | -2.15043 | -2.71119  | -2.28886   | BGIOSGA017330  | XP_006664297.2PREDICTED: uncharacterized protein LOC102709420                                      |
| TCONS_00019536 | -2.14969 | -2.71201  | -0.705785  | BGIOSGA034470  | XP_015692828.1 histone H3-5-like                                                                   |
| TCONS_00029405 | -2.14899 | -4.29774  | -0.418051  | BGIOSGA000248  | XP_015695001.1 CRIB domain-containing protein RIC4-like isoform X2                                 |
| TCONS_00021529 | -2.14752 | #NA       | -2.29625   | BGIOSGA017662  | XP_006655737.2 oligopeptide transporter 7-like                                                     |
| TCONS_00020006 | -2.14607 | -2.7161   | 0.0219967  | BGIOSGA029432  | XP_006656577.1PREDICTED: uncharacterized protein LOC102699792                                      |
| TCONS_00003751 | -2.14527 | -1.71704  | #NA        | BGIOSGA001456  | XP_006644287.1 WAT1-related protein At5g64700-like                                                 |
| TCONS_00024653 | -2.14497 | #NA       | -2.30273   | BGIOSGA013565  | XP_006658323.1 non-specific lipid transfer protein GPI-anchored 2-like                             |
| TCONS_00013201 | -2.1444  | -1.71807  | -0.719211  | BGIOSGA029269  | XP_006650610.1 PLASMODESMATA CALLOSE-BINDING PROTEIN 2-like                                        |
| TCONS_00008121 | -2.14426 | 0.982205  | 0.0174086  | BGIOSGA026037  | XP_015689595.1 protein FAF-like, chloroplastic                                                     |
| TCONS_00012106 | -2.14374 | -3.30383  | 0.196656   | BGIOSGA011874  | XP_006651050.1 peroxidase 44-like                                                                  |
| TCONS_00018249 | -2.14257 | -1.72028  | #NA        | #N/A           | #N/A                                                                                               |
| TCONS_00027674 | -2.14167 | -0.914038 | -0.311075  | BGIOSGA017354  | NP_001141770.1fiber protein Fb34 precursor                                                         |
| TCONS_00009969 | -2.14157 | -1.72151  | -2.31131   | BGIOSGA000583  | XP_006650007.1 WRKY transcription factor 44-like                                                   |
| TCONS_00011670 | -2.14139 | 0.863228  | -1.31177   | BGIOSGA011338  | XP_006649497.1 protein LURP-one-related 6-like                                                     |
| TCONS_00017632 | -2.14139 | -0.219234 | -0.4373    | BGIOSGA013688  | XP_003566333.1RING-H2 finger protein ATL39                                                         |
| TCONS_00006261 | -2.14122 | -0.721955 | 0.687785   | BGIOSGA016453  | XP_006647372.1 NAC transcription factor 29-like isoform X2                                         |
| TCONS_00001429 | -2.14113 | #NA       | 0.494922   | BGIOSGA004059  | XP_015696662.1 CBS domain-containing protein CBSX3, mitochondrial-like isoform X1                  |
| TCONS_00004141 | -2.14079 | -1.40055  | -0.143351  | BGIOSGA015169  | XP_012701989.1splicing factor U2af small subunit B                                                 |
| TCONS_00019479 | -2.14033 | -2.72307  | -2.31445   | BGIOSGA025417  | XP_006655407.1PREDICTED: uncharacterized protein LOC102721368                                      |
| TCONS_00019373 | -2.13996 | -0.138558 | 0.00656142 | BGIOSGA036887  | XP_006654465.1 RING-H2 finger protein ATL72-like                                                   |
| TCONS_00003111 | -2.13989 | -4.30857  | -3.9005    | BGIOSGA018582  | XP_006643923.1 bidirectional sugar transporter SWEET3b                                             |
| TCONS_00036101 | -2.13969 | -0.238438 | -0.550519  | #N/A           | #N/A                                                                                               |
| TCONS_00026092 | -2.1386  | -3.09569  | -4.97744   | BGIOSGA014345  | XP_015695988.1 probable LRR receptor-like serine/threonine-protein kinase At1g56140                |

transcriptome

|                |          |            |           |               |                                                                                      |
|----------------|----------|------------|-----------|---------------|--------------------------------------------------------------------------------------|
| TCONS_00023613 | -2.1374  | -1.1418    | -0.234331 | #N/A          | #N/A                                                                                 |
| TCONS_00020184 | -2.13591 | -1.40672   | -1.74055  | BGIOSGA001050 | XP_014752502.1transcription factor SPATULA                                           |
| TCONS_00030545 | -2.13506 | -1.72972   | -3.91259  | BGIOSGA025018 | XP_006660983.1 stem bromelain-like                                                   |
| TCONS_00002591 | -2.13488 | -1.72995   | -1.32807  | BGIOSGA012703 | XP_015688315.1 cationic peroxidase SPC4-like                                         |
| TCONS_00021939 | -2.13478 | -3.73007   | -3.32831  | BGIOSGA026963 | XP_006656823.1 cyclin-D1-1-like                                                      |
| TCONS_00012573 | -2.13426 | 0.501935   | -2.3296   | BGIOSGA037797 | XP_006651561.1 protein DETOXIFICATION 40-like                                        |
| TCONS_00025820 | -2.13372 | #N/A       | -1.33095  | BGIOSGA035910 | XP_015695754.1 kinesin-1-like protein PSS1                                           |
| TCONS_00030322 | -2.13306 | -1.50985   | -1.18058  | BGIOSGA028015 | XP_006660806.1 UDP-glucuronate 4-epimerase 6-like                                    |
| TCONS_00009996 | -2.13191 | -0.511284  | -0.460937 | BGIOSGA012550 | XP_006650025.1 zinc finger CCCH domain-containing protein 22                         |
| TCONS_00008067 | -2.1319  | -0.478435  | -1.76607  | BGIOSGA036001 | XP_015689429.1PREDICTED: uncharacterized protein At2g33490                           |
| TCONS_00039815 | -2.13142 | 1.75065    | -0.392824 | #N/A          | XP_013443004.1senescence-associated protein                                          |
| TCONS_00005649 | -2.13046 | -0.695961  | -1.70154  | BGIOSGA027042 | XP_015689281.1 ABC transporter G family member 39                                    |
| TCONS_00005082 | -2.11844 | -1.72961   | -1.10213  | BGIOSGA035359 | XP_004971226.1amino-acid permease BAT1 homolog isoform X1                            |
| TCONS_00023343 | -2.10274 | -2.32605   | #N/A      | BGIOSGA002134 | XP_010918573.1 U-box domain-containing protein 33-like                               |
| TCONS_00031555 | -2.10168 | -3.06108   | -3.46751  | BGIOSGA038274 | XP_006662555.1 aspartic proteinase nepenthesin-1-like                                |
| TCONS_00014186 | -2.09663 | -3.03003   | -0.994607 | BGIOSGA008423 | XP_004975533.1uncharacterized protein LOC101752917                                   |
| TCONS_00007692 | -2.093   | -2.43154   | -4.2031   | BGIOSGA004483 | XP_006647116.1 potassium channel KAT1                                                |
| TCONS_00009876 | -2.08475 | 0.235573   | -0.52062  | BGIOSGA012431 | XP_006651287.1 CASP-like protein 4B2                                                 |
| TCONS_00019877 | -2.07893 | -0.529826  | -2.9988   | BGIOSGA026081 | XP_015692977.1 PLASMODESMATA CALLOSE-BINDING PROTEIN 5-like                          |
| TCONS_00004262 | -2.07868 | -2.55445   | -2.28146  | BGIOSGA000942 | XP_006644585.1 anoctamin-like protein Os01g0706700                                   |
| TCONS_00009603 | -2.07696 | -0.669824  | 0.0551751 | BGIOSGA012148 | XP_004985154.2probable UDP-3-O-acyl-N-acetylglucosamine deacetylase 2, mitochondrial |
| TCONS_00026634 | -2.07506 | -0.824215  | -1.78603  | BGIOSGA010698 | XP_003572210.1probable transcription factor RL9                                      |
| TCONS_00000300 | -2.07414 | -1.82538   | -1.59568  | BGIOSGA019621 | XP_003569538.4UDP-glycosyltransferase 73C1                                           |
| TCONS_00033917 | -2.07372 | -6.82869   | -2.25143  | BGIOSGA008366 | XP_015697930.1PREDICTED: uncharacterized protein LOC102705204 isoform X1             |
| TCONS_00002257 | -2.07204 | -3.39553   | -0.457089 | BGIOSGA002935 | XP_006646518.2 protein NRT1/ PTR FAMILY 5.10-like                                    |
| TCONS_00017539 | -2.06653 | -1.51583   | -1.35177  | BGIOSGA037152 | XP_004962492.1wall-associated receptor kinase-like 20                                |
| TCONS_00027911 | -2.06576 | -0.87719   | -1.50492  | BGIOSGA002978 | XP_002444204.1phosphoenolpyruvate carboxylase 2-like                                 |
| TCONS_00002191 | -2.06494 | -1.97212   | -1.75527  | BGIOSGA017951 | XP_006645042.1 auxin transporter-like protein 1                                      |
| TCONS_00018871 | -2.06372 | -3.84328   | -1.13185  | #N/A          | #N/A                                                                                 |
| TCONS_00019606 | -2.06213 | -1.84701   | -1.92903  | BGIOSGA017752 | XP_004951295.1ribosome production factor 2 homolog                                   |
| TCONS_00004145 | -2.06107 | -0.0788943 | -0.77581  | BGIOSGA036689 | XP_006644499.1 putative receptor protein kinase ZmPK1                                |
| TCONS_00022521 | -2.05346 | -0.0215244 | -1.86259  | BGIOSGA034555 | XP_015694450.1 putative receptor protein kinase ZmPK1                                |
| TCONS_00023576 | -2.05284 | -0.387158  | -0.309946 | BGIOSGA025604 | XP_015695411.1 oxidation resistance protein 1 isoform X1                             |
| TCONS_00009946 | -2.05266 | -5.56172   | -2.35631  | BGIOSGA012830 | XP_015690582.1PREDICTED: uncharacterized protein LOC102704685                        |
| TCONS_00014170 | -2.05264 | -1.29357   | -0.714545 | BGIOSGA035823 | XP_006652240.1 probable BOI-related E3 ubiquitin-protein ligase 3                    |
| TCONS_00005202 | -2.05142 | 0.125883   | -0.313529 | BGIOSGA001076 | XP_015696091.1 GATA transcription factor 16-like                                     |
| TCONS_00032013 | -2.0488  | -4.45391   | -0.966014 | BGIOSGA029560 | XP_015697218.1 UDP-glycosyltransferase 83A1-like                                     |
| TCONS_00034525 | -2.04848 | -0.646957  | -0.966811 | BGIOSGA016309 | XP_015697762.1 serine carboxypeptidase-like 42                                       |
| TCONS_00006246 | -2.04651 | 0.406341   | -2.371    | BGIOSGA013560 | XP_006647362.1 ammonium transporter 3 member 3                                       |
| TCONS_00027446 | -2.04477 | -2.8774    | -2.12574  | BGIOSGA010555 | XP_004972725.1nuclear transcription factor Y subunit B-11                            |
| TCONS_00033948 | -2.04131 | -0.315935  | -1.00307  | #N/A          | #N/A                                                                                 |
| TCONS_00037545 | -2.04009 | -0.980556  | 0.296385  | BGIOSGA037806 | XP_015698183.1PREDICTED: uncharacterized protein LOC102704106 isoform X1             |
| TCONS_00002291 | -2.03996 | -2.62458   | -1.80197  | BGIOSGA004929 | XP_024316012.1protein DMP7                                                           |
| TCONS_00008151 | -2.0377  | -5.59899   | -2.0071   | BGIOSGA010431 | XP_021302307.1uncharacterized protein LOC110429892 isoform X1                        |
| TCONS_00029277 | -2.03737 | 0.594536   | -0.108018 | BGIOSGA031020 | XP_010238314.1uncharacterized protein LOC100833007 isoform X2                        |
| TCONS_00014611 | -2.03735 | -3.67484   | -4.27662  | BGIOSGA023490 | XP_015691666.1 auxin response factor 10-like                                         |
| TCONS_00012154 | -2.03596 | -4.21459   | -0.226988 | BGIOSGA013101 | XP_006649985.1 transcription factor WER-like                                         |
| TCONS_00034321 | -2.03455 | -1.04645   | -0.356036 | BGIOSGA017208 | XP_015698112.1 transcription factor HBP-1b(c38)-like                                 |
| TCONS_00015270 | -2.03445 | -1.66643   | -2.88047  | BGIOSGA009834 | XP_015691995.1 ATP sulfurylase 2-like                                                |
| TCONS_00000165 | -2.03389 | -3.21721   | -2.81711  | BGIOSGA012138 | XP_004968148.1uncharacterized protein LOC101756502                                   |
| TCONS_00032660 | -2.02457 | -0.480456  | -1.45194  | BGIOSGA031513 | XP_004983723.1scarecrow-like protein 6 isoform X1                                    |
| TCONS_00011503 | -2.02228 | -1.44119   | -0.558338 | BGIOSGA011523 | XP_015691230.1PREDICTED: LOW QUALITY PROTEIN: uncharacterized protein LOC102705985   |
| TCONS_00026911 | -2.01957 | -3.30606   | 0.162487  | BGIOSGA032653 | XP_004973644.1cytochrome P450 76M5                                                   |
| TCONS_00002719 | -2.01729 | -3.14764   | -1.45883  | BGIOSGA034403 | XP_006643720.2PREDICTED: uncharacterized protein LOC102705568                        |
| TCONS_00033091 | -2.01719 | -1.46886   | -1.71587  | BGIOSGA004814 | XP_003567273.1steroid 5-alpha-reductase DET2                                         |
| TCONS_00026761 | -2.01322 | -2.34833   | -1.83263  | BGIOSGA004875 | XP_015695634.1 aspartic proteinase nepenthesin-1-like                                |

transcriptome

|                |          |           |           |                |                                                                                           |
|----------------|----------|-----------|-----------|----------------|-------------------------------------------------------------------------------------------|
| TCONS_00021504 | -2.01303 | -5.93353  | -2.72619  | BGIOSGA003966  | XP_002451310.1aspartyl protease family protein At5g10770                                  |
| TCONS_00003528 | -2.00757 | 0.0355429 | -3.11387  | BGIOSGA0032278 | XP_015688641.1 rapid alkalization factor-like                                             |
| TCONS_00015544 | -2.0071  | #NA       | #NA       | BGIOSGA010748  | NP_001148034.1flowering promoting factor-like 1                                           |
| TCONS_00011224 | -2.00443 | -0.239558 | -1.00902  | BGIOSGA002775  | XP_006650798.1 floral homeotic protein APETALA 2-like                                     |
| TCONS_00004999 | -2.00184 | 0.536802  | -0.707983 | BGIOSGA027245  | XP_006645258.2 disease resistance protein RPP13-like                                      |
| TCONS_00021570 | -1.99768 | #NA       | -1.55378  | #NA            | #N/A                                                                                      |
| TCONS_00024175 | -1.99375 | -2.46328  | -2.39825  | BGIOSGA030892  | XP_004958444.1cytochrome P450 709B2                                                       |
| TCONS_00026759 | -1.99253 | -1.98094  | -2.15182  | BGIOSGA005531  | XP_006660196.1 nitrate reductase [NADH] 1                                                 |
| TCONS_00001533 | -1.99161 | 0.0179515 | -1.15416  | BGIOSGA004166  | XP_006646181.1PREDICTED: uncharacterized protein LOC102713233                             |
| TCONS_00019876 | -1.99149 | -1.69269  | -1.15447  | #NA            | #N/A                                                                                      |
| TCONS_00000445 | -1.99057 | -2.56828  | -0.156791 | BGIOSGA003380  | XP_006645643.1PREDICTED: uncharacterized protein LOC102714248                             |
| TCONS_00011794 | -1.98939 | -3.56973  | -3.15977  | BGIOSGA011143  | XP_014755488.1zinc finger protein 8                                                       |
| TCONS_00011644 | -1.98925 | -2.49718  | -2.31748  | BGIOSGA006190  | XP_015691058.1 sucrose transport protein SUT1                                             |
| TCONS_00002935 | -1.98887 | -1.57037  | -2.16107  | BGIOSGA002288  | XP_004968380.1transcription factor HY5                                                    |
| TCONS_00021214 | -1.9884  | -2.57097  | -3.16226  | BGIOSGA007333  | XP_021316104.1MADS-box protein ZMM17 isoform X1                                           |
| TCONS_00011526 | -1.98762 | -3.57195  | -1.57925  | BGIOSGA011503  | XP_006649350.1 glutathione S-transferase F11-like                                         |
| TCONS_00003119 | -1.98667 | -3.57316  | -0.581655 | BGIOSGA004145  | XP_006643927.1 V-type proton ATPase subunit E                                             |
| TCONS_00015676 | -1.98483 | 0.331412  | 1.1142    | BGIOSGA015303  | XP_004975313.1protein CMSS1                                                               |
| TCONS_00022389 | -1.98362 | -4.16197  | -0.951826 | BGIOSGA023528  | XP_006657042.1 peroxidase P7-like                                                         |
| TCONS_00030062 | -1.98343 | -1.99229  | #NA       | BGIOSGA029746  | XP_015696617.1 UBP1-associated proteins 1C-like                                           |
| TCONS_00004104 | -1.98284 | -2.49053  | -3.17616  | BGIOSGA036419  | XP_006646165.1 G-box-binding factor 3-like                                                |
| TCONS_00011150 | -1.98165 | -0.935627 | -0.594133 | BGIOSGA020192  | XP_002466268.1LEAF RUST 10 DISEASE-RESISTANCE LOCUS RECEPTOR-LIKE PROTEIN KINASE-like 1.5 |
| TCONS_00029351 | -1.98131 | -1.29981  | -2.52788  | BGIOSGA000865  | XP_006649362.2 crocetin glucosyltransferase 2-like                                        |
| TCONS_00000716 | -1.98101 | -1.99533  | -2.85876  | BGIOSGA027183  | XP_006645792.1 polygalacturonase At1g48100-like                                           |
| TCONS_00011516 | -1.98065 | -0.332821 | -0.181586 | BGIOSGA010894  | XP_015691262.1 probable acyl-activating enzyme 1, peroxisomal                             |
| TCONS_00008180 | -1.97423 | -0.604753 | -0.67438  | BGIOSGA006259  | XP_006647374.1 tRNA (guanine(10)-N2)-methyltransferase homolog                            |
| TCONS_00000125 | -1.97359 | -0.829762 | -2.09565  | BGIOSGA024868  | XP_006645459.2 putative receptor-like protein kinase At4g00960                            |
| TCONS_00009335 | -1.96912 | -6.0216   | #NA       | BGIOSGA022541  | XP_015690478.1 FAD-dependent urate hydroxylase-like                                       |
| TCONS_00012112 | -1.96327 | -4.55704  | -4.5695   | BGIOSGA033804  | XP_015689866.1 myb-related protein P-like                                                 |
| TCONS_00019917 | -1.95466 | -0.522798 | 0.529637  | BGIOSGA001422  | XP_006655659.1 vacuolar cation/proton exchanger 1b-like                                   |
| TCONS_00030466 | -1.95302 | -2.86422  | -2.13727  | BGIOSGA002371  | NP_001306682.1hypothetical protein                                                        |
| TCONS_00008342 | -1.94998 | -2.86805  | -2.88179  | BGIOSGA006080  | XP_015689016.1 probable protein phosphatase 2C 21                                         |
| TCONS_00000079 | -1.94348 | -1.50529  | -2.66864  | BGIOSGA011326  | XP_006651417.2PREDICTED: uncharacterized protein LOC102712794                             |
| TCONS_00036413 | -1.9433  | -2.47275  | -0.695697 | BGIOSGA010637  | XP_006664181.1 NAC domain-containing protein 21/22-like                                   |
| TCONS_00035714 | -1.94181 | -2.57988  | -0.890374 | BGIOSGA000394  | XP_015698432.1 amino acid permease 6-like isoform X2                                      |
| TCONS_00032776 | -1.94025 | -2.44047  | -3.71573  | BGIOSGA032372  | XP_004983539.1probable xyloglucan endotransglucosylase/hydrolase protein 28               |
| TCONS_00026270 | -1.9395  | 0.1597    | -0.187993 | BGIOSGA011183  | XP_004973139.1putative receptor-like protein kinase At1g80870                             |
| TCONS_00002672 | -1.93945 | -3.47302  | -2.06848  | BGIOSGA015756  | XP_004967946.1swi5-dependent recombination DNA repair protein 1 homolog                   |
| TCONS_00012351 | -1.93631 | -0.381005 | -0.426558 | BGIOSGA010640  | XP_010228570.1RNA-binding KH domain-containing protein RCF3                               |
| TCONS_00020402 | -1.93557 | -2.42346  | -3.07811  | BGIOSGA009748  | XP_006656810.1 probable mannan synthase 3                                                 |
| TCONS_00030816 | -1.93327 | -0.916339 | -1.55213  | BGIOSGA024379  | XP_015695317.1PREDICTED: uncharacterized protein LOC102721177                             |
| TCONS_00000490 | -1.93316 | -1.46729  | -2.7412   | BGIOSGA028533  | XP_015698965.1 pentatricopeptide repeat-containing protein At5g25630                      |
| TCONS_00000982 | -1.93311 | 0.597897  | 0.697421  | BGIOSGA003586  | XP_015698079.1 tRNA (guanine(37)-N1)-methyltransferase 1                                  |
| TCONS_00024237 | -1.93087 | -1.95854  | -2.60097  | BGIOSGA026281  | XP_015695132.1PREDICTED: uncharacterized protein LOC102715406                             |
| TCONS_00034559 | -1.93056 | 1.4178    | -0.701271 | BGIOSGA032070  | XP_015698105.1 putative disease resistance RPP13-like protein 3                           |
| TCONS_00009138 | -1.92785 | -3.67511  | -1.95419  | BGIOSGA007353  | XP_021305642.1uncharacterized protein LOC110431213 isoform X3                             |
| TCONS_00020141 | -1.92759 | -2.37255  | -0.123695 | BGIOSGA022338  | XP_015694424.1 putative lipase YDR444W isoform X4                                         |
| TCONS_00009498 | -1.91632 | -1.6729   | -1.83632  | BGIOSGA029642  | XP_006649565.1 protein indeterminate-domain 2-like                                        |
| TCONS_00037514 | -1.91586 | -2.44376  | 0.141492  | BGIOSGA024116  | XP_006664184.1 putative serine/threonine-protein kinase                                   |
| TCONS_00032690 | -1.91578 | -2.66646  | -1.38843  | BGIOSGA031419  | XP_006662053.1 S-norococlaurine synthase 1-like                                           |
| TCONS_00001735 | -1.91468 | -1.95479  | -1.73811  | BGIOSGA022182  | XP_004969793.1senescence/dehydration-associated protein At4g35985, chloroplastic          |
| TCONS_00003269 | -1.91141 | -3.63864  | -2.53322  | BGIOSGA031952  | XP_006644026.2 cyclic dof factor 2-like                                                   |
| TCONS_00037782 | -1.9015  | 0.0908466 | -0.768984 | BGIOSGA030880  | XP_015697732.1 probable glucuronosyltransferase Os03g0107900                              |
| TCONS_00009224 | -1.90118 | -3.49451  | -0.506732 | BGIOSGA031498  | XP_002468602.2pre-mRNA-splicing ATP-dependent RNA helicase prp28                          |

transcriptome

|                |          |              |            |               |                                                                                                                              |
|----------------|----------|--------------|------------|---------------|------------------------------------------------------------------------------------------------------------------------------|
| TCONS_00034115 | -1.89995 | 0.361919     | -1.77282   | BGIOSGA002974 | XP_006663143.1 fatty acid desaturase DES3-like<br>XP_002436768.2protein ALTERED                                              |
| TCONS_00021936 | -1.89887 | 0.087543     | 0.0725067  | BGIOSGA001108 | XYLOGLUCAN 4                                                                                                                 |
| TCONS_00021539 | -1.89863 | -2.91277     | -1.29068   | BGIOSGA007655 | XP_006656596.1 protein TPX2-like isoform X3<br>XP_006649765.1 phosphoenolpyruvate<br>carboxykinase [ATP]                     |
| TCONS_00011929 | -1.89634 | -0.361047    | -1.07781   | BGIOSGA032182 | XP_015697861.1PREDICTED: uncharacterized<br>protein LOC102707256                                                             |
| TCONS_00035239 | -1.89468 | -2.9709      | -2.07638   | BGIOSGA032824 | XP_006652394.1 cytochrome P450 724B1                                                                                         |
| TCONS_00016063 | -1.89277 | -2.43588     | -1.80534   | BGIOSGA014915 | XP_006661204.1 ABC transporter G family<br>member 17-like                                                                    |
| TCONS_00028972 | -1.88737 | -1.57299     | -0.0929982 | BGIOSGA018135 | XP_006654148.2 shaggy-related protein kinase<br>eta-like                                                                     |
| TCONS_00018809 | -1.88624 | -0.404352    | -0.391226  | BGIOSGA031532 | XP_006663711.1 transcription activator GLK2-<br>like                                                                         |
| TCONS_00034122 | -1.88416 | -1.09886     | -1.73346   | BGIOSGA030709 | XP_006657805.1 cysteine-rich receptor-like<br>protein kinase 10                                                              |
| TCONS_00025276 | -1.88053 | -1.2666      | -0.944356  | BGIOSGA016189 | XP_014757547.1phosphatidate<br>cytidylyltransferase, mitochondrial isoform X3                                                |
| TCONS_00019000 | -1.87922 | -1.58316     | -1.63152   | BGIOSGA006117 | XP_006643769.1 serine/arginine-rich splicing<br>factor RS2Z32-like isoform X1                                                |
| TCONS_00002855 | -1.87658 | -1.20721     | -1.10943   | BGIOSGA018758 | NP_001308334.1uncharacterized<br>LOC100126915                                                                                |
| TCONS_00013491 | -1.87644 | -1.32839     | -1.84878   | BGIOSGA009499 | XP_015689293.1 tyrosine-sulfated glycopeptide<br>receptor 1-like                                                             |
| TCONS_00006148 | -1.87323 | -1.80638     | -2.55505   | BGIOSGA007117 | XP_010227773.1protein NRT1/ PTR FAMILY 3.1                                                                                   |
| TCONS_00020487 | -1.87126 | -2.04471     | -0.119719  | BGIOSGA024994 | XP_012849888.1 retrovirus-related Pol<br>polyprotein from transposon TNT 1-94                                                |
| TCONS_00038638 | -1.87021 | -1.88401     | -1.8467    | BGIOSGA034329 | XP_003567294.1NAC domain-containing protein<br>90                                                                            |
| TCONS_00002214 | -1.86662 | -1.45481     | -0.85655   | BGIOSGA029710 | XP_015691947.1PREDICTED: uncharacterized<br>protein LOC102702841                                                             |
| TCONS_00015203 | -1.86484 | -1.34589     | 0.707822   | BGIOSGA033437 | #N/A                                                                                                                         |
| TCONS_00028165 | -1.86236 | -2.34939     | #NA        | #N/A          | #N/A                                                                                                                         |
| TCONS_00001773 | -1.86201 | -4.13047     | -3.86801   | BGIOSGA028061 | XP_003567088.1anthocyanidin 5,3-O-<br>glucosyltransferase                                                                    |
| TCONS_00036498 | -1.86108 | -0.568696    | 0.857627   | BGIOSGA032243 | XP_002442614.1protein NUCLEAR FUSION<br>DEFECTIVE 4                                                                          |
| TCONS_00015827 | -1.85783 | -5.52545     | -4.06415   | #N/A          | #N/A                                                                                                                         |
| TCONS_00004173 | -1.8575  | -2.41148     | -2.21226   | BGIOSGA001025 | XP_002458314.1two pore calcium channel<br>protein 1                                                                          |
| TCONS_00008005 | -1.8548  | -0.774535    | -0.901667  | #N/A          | #N/A                                                                                                                         |
| TCONS_00009521 | -1.85361 | 0.297787     | 0.297798   | BGIOSGA037691 | XP_015691073.1 calcium-transporting ATPase 2,<br>plasma membrane-type-like isoform X2                                        |
| TCONS_00012348 | -1.85337 | -1.70945     | -1.62841   | BGIOSGA010641 | XP_010228570.1RNA-binding KH domain-<br>containing protein RCF3                                                              |
| TCONS_00012741 | -1.85292 | -1.36188     | #NA        | BGIOSGA010225 | XP_012704286.1uncharacterized protein<br>LOC101780262 isoform X1                                                             |
| TCONS_00021795 | -1.85203 | 0.636994     | #NA        | BGIOSGA021720 | XP_006655883.1PREDICTED: uncharacterized<br>protein LOC102707779                                                             |
| TCONS_00036049 | -1.85203 | -1.36301     | -1.90845   | #N/A          | #N/A                                                                                                                         |
| TCONS_00005832 | -1.85116 | -2.36408     | -0.325621  | BGIOSGA007957 | XP_006647156.1 cytochrome c-type biogenesis<br>CcmH-like mitochondrial protein                                               |
| TCONS_00019936 | -1.85116 | 0.220882     | 1.41134    | BGIOSGA013657 | XP_006656565.1 pentatricopeptide repeat-<br>containing protein At1g08070, chloroplastic-like                                 |
| TCONS_00018426 | -1.84958 | -2.59438     | -1.45431   | BGIOSGA029477 | XP_015692983.1 inactive protein RESTRICTED<br>TEV MOVEMENT 2-like                                                            |
| TCONS_00020674 | -1.84793 | #NA          | #NA        | #N/A          | #N/A                                                                                                                         |
| TCONS_00012265 | -1.84754 | -5.8718      | -6.25636   | BGIOSGA016155 | XP_002445531.1alpha-humulene synthase                                                                                        |
| TCONS_00028039 | -1.8475  | -0.737179    | -0.951323  | BGIOSGA011897 | XP_006659417.1 protein TIFY 6a-like                                                                                          |
| TCONS_00007331 | -1.84634 | -3.6092      | -1.09647   | BGIOSGA018232 | XP_015688452.1 auxin response factor 5<br>XP_006648618.1 probable mediator of RNA<br>polymerase II transcription subunit 26c |
| TCONS_00028268 | -1.84576 | -1.37054     | 0.0761298  | BGIOSGA034437 | NP_001148038.2PVR3-like protein precursor                                                                                    |
| TCONS_00023498 | -1.84507 | -1.37132     | #NA        | BGIOSGA025531 | XP_004985957.1uncharacterized protein<br>LOC101757701                                                                        |
| TCONS_00031494 | -1.84376 | -0.372823    | -1.92882   | BGIOSGA016953 | #N/A                                                                                                                         |
| TCONS_00020115 | -1.84376 | -0.050895    | -1.92882   | #N/A          | #N/A                                                                                                                         |
| TCONS_00007168 | -1.83813 | -0.000469832 | -0.564233  | #N/A          | #N/A                                                                                                                         |
| TCONS_00001405 | -1.83754 | -1.60978     | -1.45345   | BGIOSGA026210 | XP_006644396.1 cytochrome P450 72A14-like<br>XP_015694996.1 CRIB domain-containing<br>protein RIC4-like isoform X1           |
| TCONS_00022534 | -1.83675 | -2.47806     | -2.01795   | BGIOSGA035892 | XP_015696875.1 homeobox-leucine zipper<br>protein HOX4 isoform X1                                                            |
| TCONS_00029195 | -1.83643 | -2.14648     | -0.963156  | BGIOSGA029665 | XP_002461715.1zinc transporter 8                                                                                             |
| TCONS_00023383 | -1.83629 | 0.361042     | -1.41458   | BGIOSGA005574 | XP_022684423.1putative UPF0496 protein 2                                                                                     |
| TCONS_00020595 | -1.83583 | -1.38141     | 0.0515401  | BGIOSGA001230 | NP_001105702.2pathogenesis related protein-5<br>precursor                                                                    |
| TCONS_00037570 | -1.83583 | #NA          | -1.94846   | BGIOSGA032529 | XP_015693957.1PREDICTED: uncharacterized<br>protein LOC102714932                                                             |
| TCONS_00021011 | -1.8354  | #NA          | -0.364559  | BGIOSGA015157 | #N/A                                                                                                                         |
| TCONS_00012675 | -1.83499 | -0.0603702   | -1.95056   | #N/A          | #N/A                                                                                                                         |
| TCONS_00036140 | -1.83425 | 0.0391768    | -0.121565  | BGIOSGA005643 | XP_008776553.1 putative receptor protein kinase<br>ZmPK1                                                                     |
| TCONS_00028274 | -1.83115 | -1.17471     | -0.871407  | BGIOSGA035483 | XP_006659572.1 probable lipxygenase 8,<br>chloroplastic                                                                      |
| TCONS_00024111 | -1.83075 | -0.386832    | -0.376293  | #N/A          | #N/A                                                                                                                         |
| TCONS_00025734 | -1.83045 | #NA          | #NA        | BGIOSGA032466 | XP_019057696.1 sigma factor binding protein 2,<br>chloroplastic-like                                                         |
| TCONS_00007292 | -1.8293  | -2.3884      | -1.96492   | BGIOSGA031097 | XP_004951995.1cyclin-dependent protein kinase<br>inhibitor SMR6                                                              |
| TCONS_00029446 | -1.8293  | #NA          | #NA        | BGIOSGA031191 | XP_006660936.1 auxin-responsive protein<br>SAUR36-like                                                                       |
| TCONS_00036916 | -1.82903 | -1.38869     | #NA        | #N/A          | #N/A                                                                                                                         |
| TCONS_00020822 | -1.82752 | -2.39034     | 0.61554    | BGIOSGA003983 | XP_010231417.1uncharacterized protein<br>LOC100826023                                                                        |

transcriptome

|                |          |            |           |               |                                                                                             |
|----------------|----------|------------|-----------|---------------|---------------------------------------------------------------------------------------------|
| TCONS_00027293 | -1.82752 | -0.302878  | -1.38446  | BGIOSGA027709 | XP_006659091.1 protein LOL4                                                                 |
| TCONS_00034222 | -1.82706 | -0.583499  | -0.648664 | BGIOSGA034025 | XP_004978454.1NDR1/HIN1-like protein 13                                                     |
| TCONS_00004050 | -1.82667 | -3.01356   | -2.75716  | BGIOSGA020422 | XP_006646136.2 cinnamoyl-CoA reductase 1                                                    |
| TCONS_00009773 | -1.82641 | #NA        | #NA       | BGIOSGA005056 | XP_015692950.1PREDICTED: uncharacterized protein LOC107304242                               |
| TCONS_00014820 | -1.82641 | -0.39159   | -0.97226  | BGIOSGA016992 | XP_015692056.1 glycine-rich RNA-binding protein 4, mitochondrial-like                       |
| TCONS_00033513 | -1.82641 | 0.193372   | 0.0277401 | BGIOSGA034831 | XP_006662945.1 HVA22-like protein e                                                         |
| TCONS_00032777 | -1.8262  | -1.0699    | -0.165438 | BGIOSGA031334 | XP_002464873.1protein HAIKU1                                                                |
| TCONS_00012251 | -1.8235  | 1.60507    | 0.342283  | BGIOSGA007536 | XP_015690946.1PREDICTED: uncharacterized protein LOC102707566 isoform X2                    |
| TCONS_00033291 | -1.82319 | #NA        | -2.98042  | BGIOSGA037771 | XP_006659958.1 endo-1,3;1,4-beta-D-glucanase-like                                           |
| TCONS_00002375 | -1.82289 | -2.39564   | -1.56613  | BGIOSGA008548 | XP_006645194.1 BAG family molecular chaperone regulator 2-like                              |
| TCONS_00008390 | -1.82286 | -0.370944  | -0.722901 | BGIOSGA006031 | XP_021318470.1H/ACA ribonucleoprotein complex subunit 3-like protein                        |
| TCONS_00028287 | -1.82275 | #NA        | -1.98154  | BGIOSGA026072 | XP_015695816.1PREDICTED: uncharacterized protein LOC102710806                               |
| TCONS_00002545 | -1.8227  | 0.57529    | -0.476376 | BGIOSGA033654 | XP_004983450.1uncharacterized protein LOC101760534                                          |
| TCONS_00032511 | -1.82261 | 1.18898    | 1.01811   | BGIOSGA013451 | NP_001169110.1putative acyl-CoA N-acyltransferases (NAT) family protein                     |
| TCONS_00036482 | -1.82233 | -1.81134   | 0.824764  | BGIOSGA029167 | XP_010645203.2 serine/threonine-protein phosphatase 7 long form homolog                     |
| TCONS_00007283 | -1.82156 | 0.187727   | -0.399584 | BGIOSGA037903 | XP_004952023.1dnaJ homolog subfamily B member 1                                             |
| TCONS_00008017 | -1.82132 | -2.98249   | -3.57012  | BGIOSGA019925 | XP_003566211.1postacrosomal sheath WW domain-binding protein                                |
| TCONS_00000653 | -1.82075 | -0.398219  | 0.0134079 | BGIOSGA021794 | XP_004967713.1thiodyoxypoline O-arabinosyltransferase 3                                     |
| TCONS_00022077 | -1.81797 | -1.81672   | -1.99361  | BGIOSGA021403 | XP_006656889.1PREDICTED: uncharacterized protein LOC102710884                               |
| TCONS_00012378 | -1.8177  | -3.0541    | -2.2838   | BGIOSGA010607 | XP_006651456.1 metacaspase-1-like                                                           |
| TCONS_00032772 | -1.81757 | -1.91676   | -0.272153 | BGIOSGA023234 | XP_020402992.1uncharacterized protein LOC100272480 isoform X1                               |
| TCONS_00008032 | -1.81738 | -1.40242   | #NA       | BGIOSGA006444 | XP_015698481.1 ankyrin repeat and protein kinase domain-containing protein 1-like           |
| TCONS_00016494 | -1.81715 | -1.20585   | -2.24864  | BGIOSGA007389 | XP_006653709.2 glutamate receptor 3.1                                                       |
| TCONS_00009593 | -1.81679 | -1.8182    | -2.99656  | BGIOSGA029772 | XP_006649654.1 peroxxygenase-like                                                           |
| TCONS_00029537 | -1.81667 | -1.04196   | -0.908836 | BGIOSGA016352 | XP_008784000.1 protein LITTLE ZIPPER 3                                                      |
| TCONS_00017192 | -1.81618 | -0.140907  | 0.203535  | #N/A          | #N/A                                                                                        |
| TCONS_00006839 | -1.81613 | 0.296437   | #NA       | BGIOSGA014803 | NP_001131488.1uncharacterized protein LOC100192825                                          |
| TCONS_00000512 | -1.81585 | -3.98931   | -1.58387  | BGIOSGA003086 | XP_003565541.1transcription initiation factor TFIIID subunit 4                              |
| TCONS_00006342 | -1.81454 | -2.08409   | -0.478635 | BGIOSGA028630 | XP_004984288.1probable mediator of RNA polymerase II transcription subunit 26b isoform X2   |
| TCONS_00011659 | -1.81406 | -2.08469   | 0.950816  | BGIOSGA032863 | XP_015689783.1 AP2-like ethylene-responsive transcription factor ANT                        |
| TCONS_00006057 | -1.81401 | -3.6868    | -2.59913  | BGIOSGA034465 | XP_012703198.15'-3' exoribonuclease 4 isoform X2                                            |
| TCONS_00026934 | -1.81364 | -2.25514   | -1.4739   | BGIOSGA023713 | XP_015695765.1 cyclin-dependent kinase B2-1                                                 |
| TCONS_00034250 | -1.81299 | -1.40797   | -1.00604  | BGIOSGA034542 | XP_006663799.1 dual specificity protein phosphatase 12-like                                 |
| TCONS_00017428 | -1.81297 | -0.967422  | 1.31583   | BGIOSGA011074 | XP_006655141.1 probable LRR receptor-like serine/threonine-protein kinase At1g56130         |
| TCONS_00028177 | -1.81246 | #NA        | -0.891887 | BGIOSGA036039 | XP_006659498.1 patatin-like protein 2                                                       |
| TCONS_00012376 | -1.81224 | -3.40891   | -1.13343  | BGIOSGA010611 | XP_006651456.1 metacaspase-1-like                                                           |
| TCONS_00022811 | -1.81128 | 0.431185   | -1.89479  | BGIOSGA035672 | XP_015693690.1 cysteine-rich receptor-like protein kinase 10                                |
| TCONS_00003595 | -1.81096 | -0.554913  | -0.848798 | BGIOSGA021325 | XP_003566286.1premnaspirodiene oxygenase                                                    |
| TCONS_00026787 | -1.81016 | -1.96407   | -2.15056  | BGIOSGA030925 | XP_006660211.2PREDICTED: uncharacterized protein LOC102722325                               |
| TCONS_00032880 | -1.8101  | 0.647291   | -1.27623  | BGIOSGA006948 | XP_021317511.1protein SCARECROW                                                             |
| TCONS_00017044 | -1.81007 | -3.73357   | -0.3352   | BGIOSGA022934 | XP_015693238.1 serine/threonine-protein kinase CDL1-like isoform X1                         |
| TCONS_00024515 | -1.81002 | 0.0564496  | -1.67234  | BGIOSGA024500 | XP_015694515.1 L-type lectin-domain containing receptor kinase IV.1-like                    |
| TCONS_00037521 | -1.80942 | -1.74108   | -3.44784  | BGIOSGA021700 | XP_006664738.1 homeobox-leucine zipper protein HOX33                                        |
| TCONS_00026310 | -1.80349 | -2.89641   | -2.64298  | BGIOSGA021700 | XP_015695446.1 homeobox-leucine zipper protein ROC6-like                                    |
| TCONS_00037149 | -1.80102 | -2.48001   | -1.34648  | BGIOSGA000526 | XP_006664012.1 serine/threonine-protein kinase AFC2-like                                    |
| TCONS_00021465 | -1.79843 | -1.49677   | -0.870706 | BGIOSGA019163 | XP_009385740.1 phosphoglycerate mutase-like protein AT74H isoform X2                        |
| TCONS_00010697 | -1.79571 | 0.0962534  | -1.58129  | BGIOSGA007264 | XP_006651685.1 serine/threonine-protein kinase BLUS1                                        |
| TCONS_00014832 | -1.79383 | -1.59892   | -1.14106  | BGIOSGA012079 | XP_002447005.2probable purine permease 11                                                   |
| TCONS_00000353 | -1.79256 | 0.29926    | -0.60634  | BGIOSGA006340 | XP_010239875.160S acidic ribosomal protein P2A                                              |
| TCONS_00011694 | -1.79185 | -0.0994926 | -1.57321  | BGIOSGA021886 | XP_006651114.1 transport inhibitor response 1-like protein                                  |
| TCONS_00032627 | -1.78462 | -1.5272    | -0.844459 | BGIOSGA031483 | XP_004983795.1putative pentatricopeptide repeat-containing protein At3g25060, mitochondrial |
| TCONS_00007639 | -1.78345 | -0.386428  | -2.2112   | BGIOSGA007810 | XP_014756587.1receptor-like protein kinase HSL1 isoform X1                                  |
| TCONS_00016181 | -1.78173 | -0.0678718 | -1.17466  | BGIOSGA023893 | XP_006652475.1 cytochrome c oxidase subunit 6b-2-like                                       |
| TCONS_00021348 | -1.77839 | -1.25959   | -0.305362 | BGIOSGA022659 | XP_015693721.1 protein NRT1/ PTR FAMILY 8.3-like                                            |



transcriptome

|                |          |             |             |               |                                                                                      |
|----------------|----------|-------------|-------------|---------------|--------------------------------------------------------------------------------------|
| TCONS_0002286  | -1.77161 | -2.68782    | -2.39508    | BGIOSGA006290 | XP_006645124.1 bidirectional sugar transporter SWEET1a                               |
| TCONS_00031642 | -1.77008 | 0.603121    | 0.079244    | BGIOSGA022192 | XP_015697086.1 junctophilin-1                                                        |
| TCONS_00029363 | -1.7696  | -0.633818   | -0.0546634  | BGIOSGA031113 | XP_006661453.1 flap endonuclease GEN-like 1                                          |
| TCONS_00010243 | -1.76932 | -0.274271   | -0.335458   | BGIOSGA012806 | XP_004984106.1 trimethylguanosine synthase                                           |
| TCONS_00020393 | -1.76928 | -1.99374    | -2.05203    | BGIOSGA020835 | XP_015693845.1 vacuolar amino acid transporter 1-like isoform X2                     |
| TCONS_00025756 | -1.76894 | -0.817697   | -1.36391    | BGIOSGA023035 | XP_006659001.1 protein trichome birefringence-like 28                                |
| TCONS_00021239 | -1.76818 | -1.21122    | -0.680428   | #N/A          | #N/A                                                                                 |
| TCONS_00011380 | -1.76752 | -0.904058   | -0.155023   | BGIOSGA013993 | XP_015691021.1 activating signal cointegrator 1 isoform X3                           |
| TCONS_00020013 | -1.76661 | -4.87156    | -2.15173    | BGIOSGA022338 | XP_002437727.1 uncharacterized protein LOC8066922 isoform X1                         |
| TCONS_00025396 | -1.76493 | -0.00745045 | -0.442261   | BGIOSGA024500 | NP_001146046.1 putative lectin-like receptor protein kinase family protein precursor |
| TCONS_00011780 | -1.76481 | -3.09511    | -3.54028    | BGIOSGA032693 | XP_006649616.1 remorin-like isoform X1                                               |
| TCONS_00016487 | -1.76421 | -3.55855    | -3.38263    | BGIOSGA019252 | XP_015691978.1 probable L-type lectin-domain containing receptor kinase S.5          |
| TCONS_00026116 | -1.76381 | -2.91651    | -2.49886    | BGIOSGA020032 | XP_015695524.1 zinc transporter 4-like                                               |
| TCONS_00000554 | -1.76346 | 1.1578      | -0.983916   | BGIOSGA014906 | XP_003566323.1 probable WRKY transcription factor 31                                 |
| TCONS_00020877 | -1.76339 | 1.04246     | -1.5773     | BGIOSGA036861 | XP_006656162.1 receptor-like protein kinase 5                                        |
| TCONS_00011514 | -1.76143 | 0.482146    | -0.851781   | BGIOSGA031229 | XP_015690517.1 NAC domain-containing protein 67 isoform X1                           |
| TCONS_00025565 | -1.75901 | -2.46357    | -1.55595    | BGIOSGA023869 | XP_015695359.1 transcription factor bHLH47-like                                      |
| TCONS_00019162 | -1.75873 | 0.164913    | 0.188705    | BGIOSGA018191 | XP_010231493.1 nucleolar protein 16                                                  |
| TCONS_00008599 | -1.75535 | -1.38775    | -1.60975    | BGIOSGA020522 | XP_021314244.1 probable protein phosphatase 2C 25                                    |
| TCONS_00030093 | -1.75277 | -2.02315    | -1.06723    | BGIOSGA001501 | XP_006661262.2 beta-1,3-galactosyltransferase 6-like                                 |
| TCONS_00034921 | -1.75272 | -1.47068    | -0.789838   | BGIOSGA025925 | XP_006663471.1 bidirectional sugar transporter SWEET14-like                          |
| TCONS_00014838 | -1.75224 | -0.0238148  | -0.00441592 | BGIOSGA000456 | XP_006646494.1 PREDICTED: uncharacterized protein LOC102720109, partial              |
| TCONS_00004095 | -1.75224 | -0.175818   | -2.94302    | BGIOSGA030346 | XP_006664979.1 probable WRKY transcription factor 41                                 |
| TCONS_00030891 | -1.75142 | -4.41717    | -1.87795    | BGIOSGA011225 | XP_006661687.2 ubiquitin carboxyl-terminal hydrolase 8-like isoform X2               |
| TCONS_00015817 | -1.75125 | -4.07133    | -2.17041    | BGIOSGA030609 | XP_004975477.1 protein PYRICULARIA ORYZAE RESISTANCE 21                              |
| TCONS_00014926 | -1.75084 | -0.833943   | -0.523723   | BGIOSGA014776 | XP_006450366.140S ribosomal protein S11                                              |
| TCONS_00005934 | -1.74914 | -3.68184    | -3.8694     | BGIOSGA022733 | XP_006662214.1 PREDICTED: uncharacterized protein LOC102717831                       |
| TCONS_00033891 | -1.74861 | -1.18447    | -2.22982    | BGIOSGA031216 | XP_022684006.1 uncharacterized protein LOC101781025                                  |
| TCONS_00022989 | -1.74385 | -1.34796    | -1.51484    | BGIOSGA025021 | XP_015695064.1 protein LONGIFOLIA 2                                                  |
| TCONS_00029217 | -1.74332 | -2.65043    | -1.43582    | BGIOSGA023697 | XP_004957110.1 dof zinc finger protein MNB1A                                         |
| TCONS_00025303 | -1.74299 | -0.982078   | -0.653196   | BGIOSGA015857 | XP_015694792.1 receptor-like serine/threonine-protein kinase SD1-8 isoform X3        |
| TCONS_00011556 | -1.74108 | -0.705071   | -2.27448    | BGIOSGA011852 | XP_021311624.1 uncharacterized protein LOC8059153 isoform X2                         |
| TCONS_00020317 | -1.73867 | -3.4339     | -1.10636    | BGIOSGA003394 | XP_021319277.1 PLAT domain-containing protein 3                                      |
| TCONS_00021113 | -1.73689 | #N/A        | -1.08925    | BGIOSGA021325 | XP_004965771.2 premenaspirodien oxygenase                                            |
| TCONS_00010008 | -1.73666 | -2.07386    | -0.937796   | BGIOSGA031595 | XP_010228674.2 uncharacterized protein LOC100840589                                  |
| TCONS_00011879 | -1.73554 | -0.326526   | 0.126177    | BGIOSGA005145 | XP_004985039.1 actin-depolymerizing factor 5                                         |
| TCONS_00032888 | -1.73294 | -1.43622    | -3.15052    | BGIOSGA037382 | XP_006662692.1 NAC transcription factor 29-like                                      |
| TCONS_00030806 | -1.72938 | -1.13779    | -1.6289     | BGIOSGA001471 | XP_015691994.1 disease resistance protein RGA2-like                                  |
| TCONS_00029134 | -1.72787 | -0.217376   | -2.89292    | #N/A          | #N/A                                                                                 |
| TCONS_00024516 | -1.7273  | -1.46271    | -2.57694    | BGIOSGA024874 | XP_015694515.1 L-type lectin-domain containing receptor kinase IV.1-like             |
| TCONS_00017064 | -1.72598 | -1.98944    | -0.645956   | BGIOSGA016405 | XP_015692468.1 cysteine-rich receptor-like protein kinase 2                          |
| TCONS_00011538 | -1.72027 | -1.97302    | -1.05959    | BGIOSGA022659 | XP_006649373.1 protein NRT1/ PTR FAMILY 5.2-like                                     |
| TCONS_00036246 | -1.71995 | -1.08465    | -1.48249    | BGIOSGA035558 | XP_015698182.1 putative disease resistance RPP13-like protein 3                      |
| TCONS_00017067 | -1.71969 | -2.3151     | -2.91341    | BGIOSGA017063 | NP_001348186.1 WRKY transcription factor 8                                           |
| TCONS_00024359 | -1.71773 | -1.51021    | -1.3333     | BGIOSGA036898 | XP_006658139.2 cytochrome P450 714B1-like                                            |
| TCONS_00003429 | -1.71734 | -1.93471    | -2.13006    | BGIOSGA007547 | XP_004967515.1 protein SENESCENCE-ASSOCIATED GENE 21, mitochondrial                  |
| TCONS_00016675 | -1.7163  | -1.512      | -2.33682    | BGIOSGA020130 | XP_004976940.1 receptor-like serine/threonine-protein kinase SD1-8                   |
| TCONS_00008076 | -1.7134  | -2.83711    | -3.43798    | BGIOSGA006374 | XP_021319885.1 uncharacterized protein LOC8057879 isoform X7                         |
| TCONS_00014163 | -1.70827 | -0.922237   | -0.78579    | BGIOSGA008207 | XP_006652234.1 40S ribosomal protein S27-like                                        |
| TCONS_00011126 | -1.7056  | -3.37388    | -2.97291    | BGIOSGA016052 | XP_006651904.1 PREDICTED: uncharacterized protein LOC102719373                       |
| TCONS_00012082 | -1.70353 | -1.94168    | -0.542842   | BGIOSGA010927 | XP_006649923.1 serine/threonine-protein kinase STY46-like                            |
| TCONS_00015143 | -1.70318 | -1.92534    | -1.2275     | BGIOSGA035881 | XP_015691693.1 PREDICTED: uncharacterized protein LOC102706745 isoform X1            |
| TCONS_00021652 | -1.70269 | -3.5277     | -2.71485    | BGIOSGA032356 | XP_006655814.1 disease resistance protein RPP1-like                                  |
| TCONS_00004561 | -1.70235 | -2.66489    | -1.87848    | #N/A          | #N/A                                                                                 |
| TCONS_00003636 | -1.69913 | -0.853008   | -1.43612    | BGIOSGA001572 | XP_006644203.1 mediator of RNA polymerase II transcription subunit 9                 |
| TCONS_00037983 | -1.69861 | -2.85361    | -1.85247    | BGIOSGA024656 | XP_015698019.1 putative disease resistance RPP13-like protein 3                      |

transcriptome

|                |          |                 |                |               |                                                                                            |
|----------------|----------|-----------------|----------------|---------------|--------------------------------------------------------------------------------------------|
| TCONS_00017277 | -1.69857 | -1.0974         | -1.50461       | BGIOSGA001680 | XP_024315760.1ABC transporter C family member 8 isoform X1                                 |
| TCONS_00022922 | -1.69807 | -0.992227       | -1.58962       | BGIOSGA024572 | XP_015693848.1 homeobox-leucine zipper protein HOX29                                       |
| TCONS_00034408 | -1.69766 | -1.97716        | -2.22256       | BGIOSGA014021 | XP_002450415.2ABC transporter G family member 25                                           |
| TCONS_00012050 | -1.69681 | -0.740776       | -0.446662      | BGIOSGA002365 | XP_015692414.1 serine/arginine-rich splicing factor RS2233 isoform X2                      |
| TCONS_00012382 | -1.69528 | -1.58188        | -0.155722      | BGIOSGA010604 | XP_015690943.1 transcription factor bHLH144-like                                           |
| TCONS_00004964 | -1.69265 | <b>1.72412</b>  | -3.45251       | BGIOSGA021694 | XP_002458981.1keratin, type I cytoskeletal 9                                               |
| TCONS_00030513 | -1.69197 | -1.84274        | -2.44258       | BGIOSGA015169 | XP_002462810.1phytoene synthase 2, chloroplastic isoform X1                                |
| TCONS_00012463 | -1.69108 | -2.23089        | -0.793954      | #N/A          | #N/A                                                                                       |
| TCONS_00024982 | -1.69089 | -2.2781         | 0.12805        | BGIOSGA018546 | XP_006657628.1 protein TsetseEP-like                                                       |
| TCONS_00016696 | -1.69059 | 0.440856        | 0.741299       | BGIOSGA014267 | XP_006653804.1 regulation of nuclear pre-mRNA domain-containing protein 1A-like isoform X2 |
| TCONS_00027912 | -1.6902  | 0.00792328      | -1.12218       | BGIOSGA002978 | XP_006659319.1 phosphoenolpyruvate carboxylase 2-like                                      |
| TCONS_00030312 | -1.69012 | -2.45154        | -1.18823       | BGIOSGA004422 | NP_001151910.1BHLH transcription factor                                                    |
| TCONS_00010303 | -1.68876 | -1.86576        | 0.122722       | BGIOSGA010533 | XP_006650196.1 PI-PLC X domain-containing protein At5g67130                                |
| TCONS_00023622 | -1.6887  | -1.12887        | -1.87742       | BGIOSGA030346 | XP_015694621.1 probable WRKY transcription factor 41                                       |
| TCONS_00021019 | -1.68829 | -2.86635        | -3.46341       | BGIOSGA017810 | XP_006656238.1 protein PHR1-LIKE 1                                                         |
| TCONS_00024705 | -1.68826 | 0.133614        | 0.121488       | BGIOSGA011250 | XP_015694548.1 probable prolyl 4-hydroxylase 7                                             |
| TCONS_00017225 | -1.68772 | -1.94953        | -0.879852      | BGIOSGA018721 | XP_002443222.1F-box protein At5g07610                                                      |
| TCONS_00003072 | -1.6877  | -1.75162        | -1.7279        | BGIOSGA001742 | XP_003565356.1gibberellin 2-beta-dioxygenase 1                                             |
| TCONS_00033361 | -1.68742 | -1.86745        | -0.880611      | BGIOSGA031352 | XP_003562374.1mitochondrial arginine transporter BAC1                                      |
| TCONS_00034400 | -1.68598 | -0.141337       | <b>1.37636</b> | BGIOSGA007432 | XP_015698126.1 probable alkaline/neutral invertase F                                       |
| TCONS_00038357 | -1.6857  | -3.13264        | -1.41093       | BGIOSGA028420 | XP_021307139.1uncharacterized protein LOC8080432 isoform X4                                |
| TCONS_00016493 | -1.68501 | -3.45544        | -2.47153       | BGIOSGA031276 | XP_006653708.1 protein S-acyltransferase 21-like                                           |
| TCONS_00015698 | -1.68455 | -4.87105        | -1.30273       | BGIOSGA012979 | XP_004973024.1L-gulonolactone oxidase 2                                                    |
| TCONS_00033736 | -1.68342 | -1.4033         | -0.278599      | BGIOSGA029435 | XP_010235357.1Holliday junction resolvase MOC1, chloroplastic                              |
| TCONS_00036960 | -1.67902 | -2.68686        | -1.50615       | BGIOSGA002049 | XP_006663942.1 isoflavone reductase homolog                                                |
| TCONS_00006864 | -1.67835 | -2.52165        | -2.60341       | BGIOSGA002528 | XP_006647882.1 aquaporin NIP2-1                                                            |
| TCONS_00023983 | -1.67634 | -0.04043        | -1.18644       | BGIOSGA036099 | XP_006657888.1 polyol transporter 5-like                                                   |
| TCONS_00016951 | -1.67544 | -2.65189        | -2.07032       | BGIOSGA002565 | XP_002439094.2uncharacterized protein LOC8066586                                           |
| TCONS_00021176 | -1.6743  | -0.445993       | 0.223668       | BGIOSGA027014 | XP_015693948.1 (R)-mandelonitrile lyase-like                                               |
| TCONS_00019972 | -1.6718  | -6.2649         | -2.10707       | BGIOSGA007305 | XP_006655695.1 WAT1-related protein At3g30340-like                                         |
| TCONS_00005000 | -1.67005 | -4.26711        | -1.28134       | BGIOSGA000427 | XP_006645261.1 probable protein S-acyltransferase 7 isoform X1                             |
| TCONS_00013424 | -1.66981 | -2.05396        | -0.726676      | BGIOSGA008446 | XP_006650797.1 PHD finger protein ALFIN-LIKE 3                                             |
| TCONS_00011473 | -1.66743 | -0.640268       | -0.133654      | BGIOSGA029195 | XP_006649297.1 protein DOWNY MILDEW RESISTANCE 6-like isoform X1                           |
| TCONS_00004326 | -1.6669  | -5.81878        | -1.27131       | BGIOSGA033727 | XP_006644653.1 HVA22-like protein f                                                        |
| TCONS_00000668 | -1.66686 | <b>0.599448</b> | 0.00865216     | BGIOSGA003255 | XP_002455461.1chaperone protein dnaJ 72                                                    |
| TCONS_00025747 | -1.66626 | -3.16144        | -1.37701       | BGIOSGA013871 | XP_012699366.1uncharacterized protein LOC101779282                                         |
| TCONS_00000942 | -1.66596 | -1.90864        | -1.66104       | BGIOSGA001631 | XP_003565764.1probable glutathione S-transferase GSTF1                                     |
| TCONS_00004917 | -1.66495 | -1.10733        | -1.04249       | BGIOSGA012149 | XP_006645188.1 two-component response regulator ORR26                                      |
| TCONS_00014778 | -1.66408 | -1.25206        | -3.16826       | BGIOSGA008805 | XP_006647681.1 zinc finger CCCH domain-containing protein 17                               |
| TCONS_00015483 | -1.66399 | <b>0.917748</b> | -2.16849       | BGIOSGA029313 | XP_008780635.2 S-locus-specific glycoprotein S6-like                                       |
| TCONS_00001938 | -1.66134 | -0.461972       | -1.00517       | BGIOSGA012996 | XP_022682523.1pentatricopeptide repeat-containing protein At1g09900                        |
| TCONS_00014423 | -1.66071 | -1.03466        | -1.15912       | #N/A          | #N/A                                                                                       |
| TCONS_00020009 | -1.66037 | -1.13981        | -2.28052       | BGIOSGA031674 | NP_001143208.1putative DUF594 domain containing family protein                             |
| TCONS_00017644 | -1.65925 | -0.454704       | -0.924952      | BGIOSGA036473 | XP_003568620.1uncharacterized protein LOC100834310                                         |
| TCONS_00023292 | -1.65685 | -3.17346        | -2.72201       | #N/A          | #N/A                                                                                       |
| TCONS_00035567 | -1.65606 | #NA             | #NA            | BGIOSGA019168 | XP_021316327.1putative cysteine-rich receptor-like protein kinase 32 isoform X1            |
| TCONS_00012163 | -1.65492 | -2.69107        | -2.25091       | BGIOSGA010774 | XP_006649998.1 CBL-interacting protein kinase 31                                           |
| TCONS_00019082 | -1.65248 | -1.68021        | -3.40486       | BGIOSGA017998 | XP_010231524.1protein NRT1/ PTR FAMILY 5.1 isoform X2                                      |
| TCONS_00024366 | -1.65226 | -0.416703       | -0.417595      | BGIOSGA029518 | XP_006658973.2 NAC domain-containing protein 2-like                                        |
| TCONS_00027163 | -1.65188 | -1.39001        | -0.590049      | BGIOSGA015660 | XP_006660395.2 ABC transporter B family member 1                                           |
| TCONS_00036573 | -1.6503  | -1.57539        | -1.87661       | BGIOSGA018902 | XP_006663720.1PREDICTED: uncharacterized protein LOC102720754                              |
| TCONS_00032816 | -1.64872 | -1.74615        | -1.10557       | BGIOSGA003827 | XP_015697528.1 LOB domain-containing protein 12-like                                       |
| TCONS_00020854 | -1.64669 | -0.733417       | -0.956384      | BGIOSGA014214 | XP_004965560.1calmodulin-binding receptor kinase CaMRLK                                    |
| TCONS_00014441 | -1.64512 | -1.94594        | -1.831         | BGIOSGA016601 | XP_006653520.1 ribonuclease H2 subunit B                                                   |
| TCONS_00037139 | -1.64452 | -1.98591        | -0.955619      | BGIOSGA036743 | XP_002455454.2uncharacterized protein LOC8074534                                           |

transcriptome

|                |          |            |           |               |                                                                                                     |
|----------------|----------|------------|-----------|---------------|-----------------------------------------------------------------------------------------------------|
| TCONS_00013231 | -1.6439  | -0.289156  | -0.714556 | BGIOSGA012156 | XP_008644470.1allene oxide synthase 1, chloroplastic                                                |
| TCONS_00009447 | -1.64306 | 0.379583   | 1.50555   | BGIOSGA011995 | XP_015690440.1PREDICTED: uncharacterized protein LOC102713805 isoform X1                            |
| TCONS_00003100 | -1.6427  | #NA        | -2.1996   | BGIOSGA023035 | XP_004968629.1protein trichome birefringence-like 41 isoform X1                                     |
| TCONS_00019543 | -1.64232 | -1.39564   | -2.49574  | BGIOSGA035284 | XP_003566104.1uncharacterized protein LOC100828480                                                  |
| TCONS_00018382 | -1.64079 | -1.1913    | -0.439882 | #N/A          | #N/A                                                                                                |
| TCONS_00034500 | -1.63959 | -0.657449  | -1.6454   | BGIOSGA015853 | XP_006662814.1 G-type lectin S-receptor-like serine/threonine-protein kinase At2g19130              |
| TCONS_00008803 | -1.63937 | -2.29383   | -2.72961  | #N/A          | #N/A                                                                                                |
| TCONS_00004324 | -1.63884 | -1.84042   | -1.78856  | BGIOSGA005493 | XP_002458431.2subtilisin-like protease SBT5.6                                                       |
| TCONS_00036265 | -1.63772 | -2.12001   | -0.968239 | BGIOSGA007251 | XP_005643450.1heat shock protein 70                                                                 |
| TCONS_00020587 | -1.63702 | -3.46256   | -1.80702  | BGIOSGA030919 | XP_006658036.1 probable carboxylesterase 18                                                         |
| TCONS_00007031 | -1.63627 | -2.32449   | -2.56927  | BGIOSGA009213 | XP_004954237.1E3 ubiquitin-protein ligase RNF6                                                      |
| TCONS_00025826 | -1.63505 | -0.634057  | 0.289043  | BGIOSGA028630 | XP_015695479.1 AT-hook motif nuclear-localized protein 1-like                                       |
| TCONS_00019708 | -1.63389 | -0.479105  | -0.516787 | BGIOSGA013739 | XP_015692809.1 protein REVERSION-TO-ETHYLENE SENSITIVITY1-like                                      |
| TCONS_00025217 | -1.63284 | -3.90364   | -3.49503  | BGIOSGA032176 | XP_015697295.1 proline-rich protein 4-like                                                          |
| TCONS_00015072 | -1.632   | -0.719721  | -4.12646  | BGIOSGA010303 | XP_004977053.1probable isoaspartyl peptidase/L-asparaginase 2                                       |
| TCONS_00014654 | -1.63174 | -3.20036   | -4.38105  | BGIOSGA008697 | XP_024312165.1(+)-neomenthol dehydrogenase-like isoform X2                                          |
| TCONS_00006687 | -1.62964 | -2.62604   | -0.405953 | BGIOSGA027422 | NP_001144338.1uncharacterized protein LOC100277236                                                  |
| TCONS_00023195 | -1.62904 | -1.61948   | 0.378336  | BGIOSGA025237 | XP_006658324.1 non-specific lipid-transfer protein-like protein At2g13820                           |
| TCONS_00035685 | -1.62892 | -3.20459   | -0.791901 | BGIOSGA036535 | XP_006663892.1PREDICTED: uncharacterized protein LOC102701400                                       |
| TCONS_00024026 | -1.62822 | -3.7904    | -1.0567   | BGIOSGA002451 | XP_006657907.1 zinc finger protein 4-like                                                           |
| TCONS_00008720 | -1.62758 | #NA        | #NA       | #N/A          | #N/A                                                                                                |
| TCONS_00011363 | -1.62757 | -2.22281   | -1.90046  | BGIOSGA000168 | XP_004980988.1S-norococlaurine synthase 1                                                           |
| TCONS_00025745 | -1.62728 | -1.59192   | -1.7066   | BGIOSGA012455 | XP_004958775.1BRCT domain-containing protein At4g02110                                              |
| TCONS_00009812 | -1.62606 | -0.120644  | -0.214144 | BGIOSGA012366 | XP_015690566.1 elongator complex protein 6 isoform X2                                               |
| TCONS_00002541 | -1.62553 | -1.62381   | #NA       | BGIOSGA023451 | XP_004971294.1uncharacterized protein LOC101785677                                                  |
| TCONS_00013943 | -1.62519 | #NA        | -2.80131  | BGIOSGA015402 | XP_006653261.2 wall-associated receptor kinase 5-like                                               |
| TCONS_00021337 | -1.62465 | -2.43721   | -1.76882  | BGIOSGA030474 | XP_015693783.1 protein PHR1-LIKE 1                                                                  |
| TCONS_00003090 | -1.62455 | -3.21001   | #NA       | BGIOSGA012812 | XP_015698331.1 RING-H2 finger protein ATL39-like                                                    |
| TCONS_00028581 | -1.62455 | -0.673955  | -1.03737  | BGIOSGA030326 | XP_010237337.1PRA1 family protein H isoform X2                                                      |
| TCONS_00012621 | -1.62422 | -2.21045   | -0.21881  | BGIOSGA013021 | XP_006651573.1 endoribonuclease Dicer homolog 2a                                                    |
| TCONS_00013816 | -1.62409 | -1.21058   | -1.80405  | #N/A          | #N/A                                                                                                |
| TCONS_00022787 | -1.62368 | -1.62615   | -1.22012  | BGIOSGA031637 | XP_010235843.1polyubiquitin 11 isoform X1                                                           |
| TCONS_00017070 | -1.62325 | -4.21165   | -1.48422  | BGIOSGA034428 | XP_003580557.2trinucleotide repeat-containing gene 18 protein                                       |
| TCONS_00031020 | -1.62308 | -3.21187   | -3.39155  | BGIOSGA032832 | XP_008652710.1ribosome-inactivating protein 3-like                                                  |
| TCONS_00019744 | -1.62299 | -0.890053  | -0.221843 | BGIOSGA004235 | XP_008656010.1serine/arginine repetitive matrix protein 1                                           |
| TCONS_00026494 | -1.62251 | #NA        | #NA       | BGIOSGA039995 | XP_006643674.1 glycerophosphodiester phosphodiesterase protein kinase domain-containing GDPDL2-like |
| TCONS_00016159 | -1.62206 | -3.62955   | -2.01872  | BGIOSGA025671 | XP_006652458.1 transcription factor bHLH113-like                                                    |
| TCONS_00025409 | -1.62165 | -2.76622   | -3.09967  | BGIOSGA031300 | XP_006658737.1 protein BZR1 homolog 1                                                               |
| TCONS_00000804 | -1.62055 | -1.3406    | -1.39786  | BGIOSGA011559 | XP_006644127.1 peroxidase 1-like                                                                    |
| TCONS_00021314 | -1.6204  | -2.95254   | 0.0312151 | BGIOSGA029505 | XP_015693402.1 histone H3.v1-like                                                                   |
| TCONS_00032695 | -1.62027 | -1.21542   | -2.81359  | BGIOSGA000168 | XP_006662054.1 S-norococlaurine synthase 1-like isoform X2                                          |
| TCONS_00014070 | -1.61968 | -2.63094   | -2.33122  | BGIOSGA033672 | XP_006657084.1 probable LRR receptor-like serine/threonine-protein kinase At3g47570                 |
| TCONS_00009491 | -1.61958 | -1.47932   | -2.40025  | BGIOSGA012042 | XP_006649555.1 aminotransferase ALD1 homolog                                                        |
| TCONS_00018108 | -1.61943 | -0.409126  | -0.815675 | BGIOSGA037764 | XP_015692744.1 F-box protein At5g46170-like                                                         |
| TCONS_00011534 | -1.61913 | -2.63189   | -1.49448  | BGIOSGA011490 | XP_006649364.1 putative magnesium transporter MRS2-H isoform X1                                     |
| TCONS_00009139 | -1.61899 | 0.527132   | -0.890755 | BGIOSGA018776 | NP_001335008.1tubulin beta-1 chain                                                                  |
| TCONS_00004236 | -1.61883 | -1.63227   | -0.357726 | BGIOSGA016039 | XP_006644564.2 UDP-glycosyltransferase 88B1-like                                                    |
| TCONS_00004097 | -1.61874 | -0.172955  | -0.569458 | #N/A          | XP_015698979.1 myosin heavy chain, cardiac muscle isoform-like                                      |
| TCONS_00008575 | -1.61752 | -1.75945   | -1.23543  | BGIOSGA033262 | XP_015688694.1 probable methyltransferase PMT15                                                     |
| TCONS_00023853 | -1.61736 | -2.80404   | -0.498862 | BGIOSGA002624 | XP_006657797.1 putative receptor-like protein kinase At4g00960                                      |
| TCONS_00011395 | -1.61703 | -2.63453   | -1.33617  | BGIOSGA011750 | XP_010229355.1U-box domain-containing protein 52 isoform X4                                         |
| TCONS_00005383 | -1.61699 | -0.820989  | -0.843715 | BGIOSGA007493 | XP_003570912.2putative vacuolar cation/proton exchanger 4 isoform X1                                |
| TCONS_00007152 | -1.616   | -6.05583   | -6.38917  | BGIOSGA009337 | XP_015689158.1PREDICTED: uncharacterized protein LOC102703286                                       |
| TCONS_00007720 | -1.61305 | -1.5574    | -1.40687  | BGIOSGA023032 | XP_015688969.1PREDICTED: uncharacterized protein LOC107303578                                       |
| TCONS_00023306 | -1.6125  | -2.48317   | -1.03469  | BGIOSGA013403 | XP_006657538.1 UDP-glycosyltransferase 91C1-like                                                    |
| TCONS_00014168 | -1.61243 | 0.00276781 | -1.52075  | BGIOSGA003427 | XP_015692268.1 potassium transporter 1                                                              |

## transcriptome

|                |          |            |             |               |                                                                                      |
|----------------|----------|------------|-------------|---------------|--------------------------------------------------------------------------------------|
| TCONS_00013478 | -1.61018 | -4.64501   | -2.06224    | BGIOSGA027391 | XP_003559210.4pectinesterase inhibitor 3                                             |
| TCONS_00027188 | -1.60867 | -3.02975   | -0.772061   | BGIOSGA034464 | XP_006659018.1 protein YLS9-like                                                     |
| TCONS_00028811 | -1.60843 | -0.789176  | -0.777163   | BGIOSGA030560 | XP_004956626.1E3 ubiquitin-protein ligase RDU1                                       |
| TCONS_00030441 | -1.60842 | -2.52107   | -0.0106451  | BGIOSGA012372 | XP_002444620.1probable L-ascorbate peroxidase 4                                      |
| TCONS_00003311 | -1.6081  | -1.12882   | -2.72384    | BGIOSGA001904 | XP_006645762.1PREDICTED: uncharacterized protein LOC102704022 isoform X2             |
| TCONS_00014676 | -1.60769 | -0.647744  | -0.319784   | BGIOSGA033437 | XP_006652591.1 B-box zinc finger protein 20-like                                     |
| TCONS_00037231 | -1.60698 | -1.11958   | -2.65462    | BGIOSGA036142 | XP_006664046.1 ureide permease 1-like isoform X1                                     |
| TCONS_00013209 | -1.60607 | -2.4859    | -1.03591    | BGIOSGA025118 | XP_015690295.1PREDICTED: uncharacterized protein LOC102705329                        |
| TCONS_00011241 | -1.60215 | -1.54033   | -0.0934838  | BGIOSGA013841 | XP_006650812.1 ribosomal RNA large subunit methyltransferase E                       |
| TCONS_00028059 | -1.59966 | -0.31474   | 0.689594    | BGIOSGA026929 | XP_006660155.1PREDICTED: uncharacterized protein LOC102704443                        |
| TCONS_00014363 | -1.59964 | -5.65822   | -2.67358    | BGIOSGA015557 | XP_003579877.1sugar transport protein MST1 isoform X1                                |
| TCONS_00015437 | -1.59679 | -2.21777   | -0.770638   | BGIOSGA016077 | XP_002448612.1malonyl-CoA:anthocyanidin 5-O-glucoside-6"-O-malonyltransferase        |
| TCONS_00030253 | -1.59623 | -3.71336   | -3.31551    | BGIOSGA028958 | XP_006660764.1PREDICTED: uncharacterized protein LOC102709200                        |
| TCONS_00035737 | -1.59608 | -1.66408   | -0.769945   | BGIOSGA029398 | XP_003576960.1B-box zinc finger protein 23                                           |
| TCONS_00028317 | -1.5957  | -0.556772  | -1.50467    | BGIOSGA033119 | XP_006659605.2 methyltransferase-like protein 13                                     |
| TCONS_00011899 | -1.59517 | 0.542092   | 0.122041    | BGIOSGA011116 | XP_015689830.1PREDICTED: uncharacterized protein LOC107303746                        |
| TCONS_00025460 | -1.59458 | -1.78057   | -1.26643    | BGIOSGA032724 | XP_006657912.1 probable protein S-acyltransferase 22 isoform X2                      |
| TCONS_00016246 | -1.59452 | -2.36562   | -4.96703    | BGIOSGA014729 | XP_006652508.1 BRCA1-associated RING domain protein 1-like                           |
| TCONS_00006801 | -1.59337 | -1.40446   | 0.000871031 | BGIOSGA012235 | XP_004972995.1ACT domain-containing protein ACR8                                     |
| TCONS_00006038 | -1.59277 | -1.46361   | -0.825869   | BGIOSGA008195 | XP_021315851.1putative F-box protein At2g02030 isoform X2                            |
| TCONS_00026123 | -1.59248 | -2.99056   | 0.168558    | BGIOSGA014346 | XP_006659921.1 probable LRR receptor-like serine/threonine-protein kinase At1g56130  |
| TCONS_00000977 | -1.59176 | -0.874071  | -0.41624    | BGIOSGA013850 | XP_003618098.2LRR receptor-like kinase                                               |
| TCONS_00024502 | -1.59075 | -2.16938   | -1.26094    | BGIOSGA013064 | XP_008650812.1uncharacterized LOC100191793 isoform X4                                |
| TCONS_00022297 | -1.589   | -3.09997   | -1.23038    | BGIOSGA030609 | XP_003572869.1basic proline-rich protein                                             |
| TCONS_00015808 | -1.58828 | -3.84488   | -2.0108     | BGIOSGA006381 | XP_021319043.1trihelix transcription factor ASR3 isoform X1                          |
| TCONS_00015951 | -1.58798 | -1.49373   | -1.22825    | BGIOSGA017039 | XP_003579814.1protein NRT1/ PTR FAMILY 4.3                                           |
| TCONS_00013245 | -1.58777 | -2.67455   | -1.27606    | BGIOSGA005489 | XP_018674127.1 L-type lectin-domain containing receptor kinase IV.2-like             |
| TCONS_00014199 | -1.58518 | -1.95867   | -1.4577     | BGIOSGA033295 | XP_006652261.2PREDICTED: uncharacterized protein LOC102701162                        |
| TCONS_00011209 | -1.58504 | -0.0762754 | -0.717659   | BGIOSGA013803 | XP_015691121.1 E3 ubiquitin-protein ligase RNF126-A-like                             |
| TCONS_00026952 | -1.58497 | -0.908311  | -0.458222   | BGIOSGA029006 | XP_015695666.1 oxysterol-binding protein-related protein 4C-like                     |
| TCONS_00029137 | -1.58416 | -1.44538   | -2.27965    | BGIOSGA004263 | XP_002460315.1aspartic proteinase nepenthesin-1                                      |
| TCONS_00013206 | -1.5835  | 0.64014    | -1.08108    | BGIOSGA023706 | XP_015690361.1 probable WRKY transcription factor 57                                 |
| TCONS_00005694 | -1.58312 | -1.24797   | -0.718141   | BGIOSGA013173 | XP_006648469.1 far upstream element-binding protein 2-like                           |
| TCONS_00031184 | -1.58302 | -3.76874   | -1.46305    | BGIOSGA024106 | XP_002467196.2cation/calcium exchanger 1                                             |
| TCONS_00029067 | -1.58272 | -2.69246   | -0.245798   | BGIOSGA029303 | XP_010504143.1 histone H4                                                            |
| TCONS_00029275 | -1.58109 | -3.17027   | -1.9172     | BGIOSGA031963 | XP_004957239.1uncharacterized protein LOC101783301                                   |
| TCONS_00008747 | -1.58009 | -1.24735   | 0.629834    | BGIOSGA038644 | XP_004953799.1aldehyde dehydrogenase family 2 member B7, mitochondrial               |
| TCONS_00028284 | -1.57877 | -0.320461  | -0.997607   | BGIOSGA000169 | XP_002444768.1nucleolar and coiled-body phosphoprotein 1                             |
| TCONS_00010870 | -1.57847 | -1.49551   | 0.076273    | BGIOSGA033465 | XP_014661241.1transcription factor bHLH18                                            |
| TCONS_00028497 | -1.57733 | -2.91197   | -1.2891     | BGIOSGA024529 | XP_023157675.1uncharacterized LOC100279181 isoform X1                                |
| TCONS_00008079 | -1.57672 | 0.0258539  | -2.51302    | BGIOSGA003122 | XP_006647254.1 protein indeterminate-domain 2-like                                   |
| TCONS_00023847 | -1.57642 | -1.03864   | -0.928782   | BGIOSGA024169 | XP_006658646.1 putative receptor-like protein kinase At4g00960                       |
| TCONS_00022917 | -1.57626 | -1.09115   | -1.66559    | BGIOSGA001321 | XP_006656496.1 leucine-rich repeat receptor-like kinase protein FLORAL ORGAN NUMBER1 |
| TCONS_00009641 | -1.57624 | -3.4983    | -0.291803   | BGIOSGA024901 | XP_006651195.2PREDICTED: uncharacterized protein LOC102712793                        |
| TCONS_00020048 | -1.57499 | -0.670801  | 0.184686    | BGIOSGA034929 | XP_004964410.1short-chain dehydrogenase TIC 32, chloroplastic                        |
| TCONS_00017495 | -1.57268 | -0.250245  | -0.388923   | BGIOSGA013374 | XP_015692533.1 ankyrin-like                                                          |
| TCONS_00004398 | -1.56908 | 0.195037   | -1.08034    | BGIOSGA005308 | XP_006646326.1 proline-rich receptor-like protein kinase PERK2                       |
| TCONS_00034489 | -1.56648 | -0.437962  | -0.817681   | #N/A          | #N/A                                                                                 |
| TCONS_00001956 | -1.56282 | -0.503898  | -1.15361    | BGIOSGA029702 | XP_009397166.1 pectinesterase-like                                                   |
| TCONS_00030243 | -1.56275 | -5.95937   | -2.38443    | BGIOSGA018640 | XP_015696533.1 fasciclin-like arabinogalactan protein 7 isoform X2                   |
| TCONS_00021385 | -1.56203 | 1.21173    | -1.763      | BGIOSGA010413 | XP_015693712.1 aspartic proteinase-like protein 1                                    |
| TCONS_00017235 | -1.56128 | -0.545982  | 0.607389    | BGIOSGA035541 | XP_024315058.1cyanidin 3-O-rutinoside 5-O-glucosyltransferase-like                   |
| TCONS_00022743 | -1.56111 | -3.7161    | -1.71497    | BGIOSGA022397 | XP_015695001.1 CRIB domain-containing protein RIC4-like isoform X2                   |

transcriptome

|                |          |               |            |               |                                                                                     |
|----------------|----------|---------------|------------|---------------|-------------------------------------------------------------------------------------|
| TCONS_00029227 | -1.56046 | -2.71686      | -2.30157   | BGIOSGA030969 | XP_015696834.1 F-box protein At3g07870-like isoform X2                              |
| TCONS_00003549 | -1.56009 | -3.29916      | -2.63775   | BGIOSGA034526 | XP_006644168.1 acyltransferase-like protein At1g54570, chloroplastic                |
| TCONS_00019453 | -1.55891 | -0.911354 #NA |            | BGIOSGA030243 | XP_004985170.1 beta-hexosaminidase 2                                                |
| TCONS_00011597 | -1.55668 | -3.72128      | -2.50348   | BGIOSGA029496 | XP_004985638.1 inactive protein RESTRICTED TEV MOVEMENT 2                           |
| TCONS_00007118 | -1.55671 | 0.600535      | 0.273887   | BGIOSGA037209 | XP_015688766.1 thioredoxin-like 3-2, chloroplastic                                  |
| TCONS_00007965 | -1.55625 | -0.512501     | -0.788653  | BGIOSGA017358 | XP_004952430.1 leucine-rich repeat extensin-like protein 3                          |
| TCONS_00035092 | -1.55434 | -0.402423 #NA |            | BGIOSGA002712 | XP_008679586.1 neurogenic locus notch homolog protein 3                             |
| TCONS_00031251 | -1.55273 | -0.404463     | -1.73609   | BGIOSGA024748 | XP_002467143.1 NADPH-dependent aldehyde reductase-like protein, chloroplastic       |
| TCONS_00037053 | -1.55244 | #NA           | -1.32179   | BGIOSGA015845 | XP_004977747.2 uncharacterized protein LOC101761830                                 |
| TCONS_00029409 | -1.55097 | -1.80262      | -1.25506   | BGIOSGA024416 | XP_006660895.1 thaumatin-like protein 1b isoform X1                                 |
| TCONS_00017104 | -1.55018 | -3.14465      | -0.626977  | BGIOSGA030479 | XP_004960433.2 transcription factor APG                                             |
| TCONS_00028195 | -1.55016 | 0.518285      | -1.74251   | BGIOSGA017197 | XP_015692240.1 anthocyanidin reductase-like                                         |
| TCONS_00022674 | -1.55014 | -2.72967      | -3.32752   | BGIOSGA023383 | XP_004965704.1 putative GDP-L-fucose synthase 2                                     |
| TCONS_00015910 | -1.54941 | -3.14563      | -1.52198   | BGIOSGA028195 | XP_014661246.1 BTB/POZ and MATH domain-containing protein 1                         |
| TCONS_00017808 | -1.54927 | 0.00620145    | 0.0853592  | BGIOSGA019867 | XP_012704671.1 transcription termination factor MTERF6, chloroplastic/mitochondrial |
| TCONS_00006511 | -1.54641 | -1.71248      | -1.48932   | BGIOSGA002830 | XP_006648863.1 serine carboxypeptidase-like 34                                      |
| TCONS_00037373 | -1.54617 | -5.73466      | -2.33733   | BGIOSGA033598 | XP_002443374.2 putative disease resistance RPP13-like protein 3                     |
| TCONS_00032184 | -1.54601 | -1.41028      | -1.75602   | BGIOSGA020893 | XP_004983151.1 cyclic dof factor 1                                                  |
| TCONS_00000484 | -1.54424 | 0.632138      | -2.03969   | BGIOSGA003055 | XP_015698965.1 pentatricopeptide repeat-containing protein At5g25630                |
| TCONS_00011143 | -1.54129 | -1.35894      | -2.58713   | BGIOSGA026213 | XP_004981407.1 uncharacterized protein LOC101759573                                 |
| TCONS_00011909 | -1.54086 | -3.91714      | 0.629031   | #N/A          | #N/A                                                                                |
| TCONS_00011121 | -1.54038 | 0.161881      | 0.678263   | BGIOSGA024736 | XP_024313537.15'-3' exoribonuclease 4-like                                          |
| TCONS_00020040 | -1.54018 | -1.06267      | -1.07451   | BGIOSGA017662 | XP_006655737.2 oligopeptide transporter 7-like                                      |
| TCONS_00022628 | -1.53937 | 0.385639      | -0.0910696 | BGIOSGA020815 | XP_015693843.1 extensin                                                             |
| TCONS_00030226 | -1.53857 | -1.75749      | -1.05822   | BGIOSGA022085 | XP_003578295.1 probable E3 ubiquitin-protein ligase XERICO                          |
| TCONS_00012793 | -1.53753 | -0.014198     | 0.298638   | BGIOSGA031369 | XP_015690885.1 phosphatidylinositol N-acetylglucosaminyltransferase subunit P-like  |
| TCONS_00020507 | -1.53458 | -1.20554      | -0.730684  | BGIOSGA021591 | XP_022681429.1 protein trichome birefringence-like 19                               |
| TCONS_00025706 | -1.53373 | -2.27309      | -1.73737   | BGIOSGA023739 | XP_021904043.1 potassium transporter 2                                              |
| TCONS_00032788 | -1.5335  | -2.08478      | -1.33389   | BGIOSGA031326 | XP_004983522.1 CSC1-like protein At1g32090                                          |
| TCONS_00017264 | -1.53246 | -0.763963     | 0.341553   | BGIOSGA019306 | XP_015689118.1 transmembrane protein 234 homolog                                    |
| TCONS_00037437 | -1.53159 | -0.554622     | 0.22149    | BGIOSGA000785 | XP_006664152.1 serine/threonine-protein kinase SAPK9                                |
| TCONS_00018524 | -1.52975 | -1.4552       | -1.02078   | BGIOSGA014747 | XP_010231785.1 floral homeotic protein APETALA 2 isoform X1                         |
| TCONS_00005449 | -1.52938 | 0.65366       | -0.441692  | BGIOSGA037765 | XP_022679979.1 uncharacterized protein LOC111256358                                 |
| TCONS_00002894 | -1.52894 | -4.0897       | -1.34544   | BGIOSGA002329 | XP_006645526.1 DEAD-box ATP-dependent RNA helicase 18                               |
| TCONS_00010789 | -1.52812 | -0.932888     | -1.53228   | BGIOSGA001814 | XP_004982036.1 protein FAF-like, chloroplastic isoform X1                           |
| TCONS_00015174 | -1.52774 | -4.78001      | -2.2734    | BGIOSGA033201 | XP_006653032.1 protochlorophyllide reductase A, chloroplastic                       |
| TCONS_00010987 | -1.52773 | -0.867285     | -0.383487  | BGIOSGA029560 | XP_006650616.2 UDP-glycosyltransferase 83A1-like                                    |
| TCONS_00033892 | -1.52713 | -0.686207     | -0.364804  | BGIOSGA034213 | XP_004978094.1 uncharacterized protein LOC101754822                                 |
| TCONS_00018450 | -1.52695 | -2.64519      | -1.71567   | BGIOSGA018985 | XP_015692868.1 abscisic acid 8'-hydroxylase 2-like                                  |
| TCONS_00014861 | -1.52674 | -0.290762     | -0.677698  | BGIOSGA017039 | XP_015691560.1 protein NRT1/ PTR FAMILY 8.2-like                                    |
| TCONS_00009770 | -1.52043 | -1.90715      | -2.60942   | BGIOSGA023852 | NP_001150070.1 catalytic/ hydrolase                                                 |
| TCONS_00007326 | -1.52037 | -2.77774      | -2.36718   | BGIOSGA034967 | XP_018684826.1 cycloartenol synthase-like isoform X2                                |
| TCONS_00036655 | -1.52018 | -0.92998      | -1.36766   | BGIOSGA036644 | XP_006663191.1 E3 ubiquitin-protein ligase RING1-like                               |
| TCONS_00031397 | -1.51972 | 1.71742       | -0.9796    | BGIOSGA026092 | XP_006662477.2 COBRA-like protein 4                                                 |
| TCONS_00007642 | -1.51877 | -0.424747     | -2.03077   | BGIOSGA009487 | XP_008645622.2 receptor-like protein kinase 5                                       |
| TCONS_00000832 | -1.51857 | -1.83221      | -0.325991  | BGIOSGA015083 | XP_006645848.1 neutral/alkaline invertase 1, mitochondrial-like                     |
| TCONS_00027303 | -1.51832 | -0.98141      | -0.53944   | BGIOSGA027700 | NP_001169202.1 uncharacterized LOC100383055                                         |
| TCONS_00002196 | -1.51736 | -1.93747      | -1.59321   | BGIOSGA004832 | XP_015691946.1 DNA excision repair protein ERCC-8-like                              |
| TCONS_00009633 | -1.51627 | -1.32412      | -0.422291  | BGIOSGA012177 | XP_006651192.1 branched-chain-amino-acid aminotransferase 2, chloroplastic-like     |
| TCONS_00009161 | -1.51621 | -1.98813      | -3.68322   | BGIOSGA028075 | XP_006650963.1 protein WEAK CHLOROPLAST MOVEMENT UNDER BLUE LIGHT 1-like            |
| TCONS_00031327 | -1.51612 | -4.10501      | -3.69978   | BGIOSGA008656 | XP_015697114.1 uncharacterized membrane protein At1g06890-like isoform X2           |
| TCONS_00002749 | -1.51567 | -1.29822      | -0.241464  | BGIOSGA002468 | XP_006643699.1 endonuclease 2                                                       |
| TCONS_00016564 | -1.51531 | #NA           | -3.70181   | BGIOSGA007965 | XP_006652774.1 xyloglucan endotransglucosylase/hydrolase protein 24-like            |
| TCONS_00008328 | -1.51447 | 0.352339      | -0.0600327 | BGIOSGA006098 | XP_006647470.1 pre-mRNA-splicing factor ISY1 homolog                                |

transcriptome

|                |          |            |           |               |                                                                                              |
|----------------|----------|------------|-----------|---------------|----------------------------------------------------------------------------------------------|
| TCONS_00001432 | -1.51367 | -1.52314   | -2.70588  | BGIOSGA027561 | XP_006644409.1 protein RAE1-like                                                             |
| TCONS_00000424 | -1.51305 | #NA        | #NA       | BGIOSGA002101 | XP_006645634.1 GDSL esterase/lipase At5g45910-like                                           |
| TCONS_00009338 | -1.51259 | 1.04029    | -0.184991 | BGIOSGA008187 | XP_006649421.1 FAD-dependent urate hydroxylase-like                                          |
| TCONS_00025852 | -1.51254 | #NA        | -1.70869  | BGIOSGA016640 | XP_006659085.1 kelch repeat-containing protein At3g27220-like                                |
| TCONS_00016517 | -1.51246 | -0.0636985 | 0.60379   | BGIOSGA026486 | NP_001335673.1 uncharacterized LOC100192517                                                  |
| TCONS_00003009 | -1.51213 | -1.94012   | -0.622235 | BGIOSGA020901 | XP_015695881.1 protein IQ-DOMAIN 1-like                                                      |
| TCONS_00021660 | -1.51185 | -2.78847   | -0.803505 | BGIOSGA027935 | XP_006656667.1 PREDICTED: uncharacterized protein LOC102704986                               |
| TCONS_00001252 | -1.51146 | -1.52593   | -3.71137  | BGIOSGA015659 | XP_006644329.1 aldehyde dehydrogenase family 2 member C4-like                                |
| TCONS_00001748 | -1.50932 | -1.40234   | -0.927823 | BGIOSGA004383 | XP_006644651.1 probable complex I intermediate-associated protein 30                         |
| TCONS_00005847 | -1.50925 | -0.478074  | -0.716813 | BGIOSGA016219 | XP_015688556.1 putative disease resistance protein RGA4                                      |
| TCONS_00010117 | -1.5079  | -0.899454  | -1.29834  | BGIOSGA035158 | XP_003561613.1 uncharacterized protein LOC100845964 isoform X2                               |
| TCONS_00023551 | -1.50583 | -0.689638  | -2.38386  | BGIOSGA015742 | XP_015695039.1 RING-H2 finger protein ATL45-like                                             |
| TCONS_00012939 | -1.50574 | -0.399489  | -1.30516  | BGIOSGA035762 | XP_015690015.1 ubiquitin-conjugating enzyme 15-like                                          |
| TCONS_00011324 | -1.50574 | #NA        | #NA       | #N/A          | #N/A                                                                                         |
| TCONS_00030212 | -1.50574 | -1.81453   | -0.305157 | #N/A          | #N/A                                                                                         |
| TCONS_00026578 | -1.50564 | -1.25654   | -2.3333   | BGIOSGA012043 | XP_006659385.1 sulfate transporter 1.2-like                                                  |
| TCONS_00000185 | -1.50471 | -1.11068   | -1.44511  | BGIOSGA000067 | XP_015688275.1 protein NRT1/ PTR FAMILY 8.1-like                                             |
| TCONS_00013831 | -1.5033  | -0.871437  | -0.775197 | BGIOSGA013734 | XP_004976559.1 histone H1                                                                    |
| TCONS_00002953 | -1.50305 | #NA        | -1.31683  | BGIOSGA021949 | XP_011045355.1 keratin-associated protein 5-5-like                                           |
| TCONS_00017973 | -1.50225 | #NA        | -4.40483  | BGIOSGA038476 | XP_015692629.1 pyruvate decarboxylase 1-like                                                 |
| TCONS_00000054 | -1.50172 | -4.39475   | -2.97925  | BGIOSGA033309 | XP_006654728.1 late embryogenesis abundant protein, group 3                                  |
| TCONS_00007062 | -1.50061 | -2.2665    | 0.382826  | BGIOSGA027466 | XP_002447096.2 myristoylated alanine-rich C-kinase substrate                                 |
| TCONS_00014969 | -1.49968 | -4.62841   | -2.60922  | BGIOSGA017157 | XP_006652844.1 PREDICTED: uncharacterized protein LOC102709170                               |
| TCONS_00011167 | -1.49902 | -6.2685    | -3.54712  | BGIOSGA037606 | XP_015691197.1 protochlorophyllide-dependent translocon component 52, chloroplastic-like     |
| TCONS_00015507 | -1.49801 | 0.537589   | -3.28657  | BGIOSGA015478 | XP_014751506.1 probable cleavage and polyadenylation specificity factor subunit 1 isoform X3 |
| TCONS_00015470 | -1.498   | -0.354835  | -0.59635  | BGIOSGA029361 | XP_006652120.1 probable L-ascorbate peroxidase 3                                             |
| TCONS_00011310 | -1.49788 | -1.96425   | -1.03014  | BGIOSGA013916 | XP_015690195.1 vacuolar protein sorting-associated protein 9A-like isoform X3                |
| TCONS_00016430 | -1.49724 | -2.27073   | -1.5515   | BGIOSGA032403 | XP_020403774.1 uncharacterized LOC103846073 isoform X2                                       |
| TCONS_00035489 | -1.4969  | -1.41102   | -1.19882  | BGIOSGA017808 | XP_015698113.1 probable serine/threonine-protein kinase WNK8                                 |
| TCONS_00014780 | -1.49561 | -2.34411   | -3.55239  | BGIOSGA022231 | XP_006652667.1 SPX domain-containing membrane protein Osl_17046                              |
| TCONS_00018083 | -1.49243 | 0.265899   | -1.11524  | BGIOSGA036578 | XP_003568162.1 cyclic nucleotide-gated ion channel 4                                         |
| TCONS_00037022 | -1.49221 | -0.79667   | 0.35547   | BGIOSGA027947 | XP_015698270.1 E3 ubiquitin-protein ligase RGLG2-like                                        |
| TCONS_00030355 | -1.49184 | -2.40699   | -1.30367  | BGIOSGA029444 | XP_006661430.2 PREDICTED: uncharacterized protein LOC102722423 isoform X1                    |
| TCONS_00005534 | -1.49182 | -2.26951   | -1.19681  | BGIOSGA031055 | XP_006646951.1 squamosa promoter-binding-like protein 4 isoform X1                           |
| TCONS_00036053 | -1.49008 | -0.96802   | -0.985592 | BGIOSGA002717 | XP_006657487.1 2'-deoxymugineic-acid 2'-dioxigenase-like                                     |
| TCONS_00023200 | -1.48926 | -1.45266   | -1.11342  | BGIOSGA021316 | XP_006658327.1 protein tesmin/TSO1-like CXC 2                                                |
| TCONS_00007675 | -1.48867 | 0.922925   | 0.089578  | BGIOSGA037152 | XP_015689003.1 probable LRR receptor-like serine/threonine-protein kinase At2g24230          |
| TCONS_00023487 | -1.48792 | -1.86546   | 0.956952  | BGIOSGA019803 | XP_006657613.2 putative aldehyde oxidase-like protein                                        |
| TCONS_00010737 | -1.48726 | 0.172214   | -0.43048  | BGIOSGA010022 | XP_004979814.1 putative disease resistance RPP13-like protein 1 isoform X1                   |
| TCONS_00008777 | -1.48615 | -0.425316  | -0.712316 | BGIOSGA012071 | XP_015689322.1 formin-like protein 16                                                        |
| TCONS_00001508 | -1.48498 | -2.50888   | 0.363497  | BGIOSGA032101 | XP_006645021.1 laccase-7                                                                     |
| TCONS_00009249 | -1.4849  | -1.87169   | 0.0397194 | BGIOSGA024325 | XP_006651010.1 expansin-like A1                                                              |
| TCONS_00019907 | -1.48304 | -0.975744  | 0.472374  | BGIOSGA001316 | XP_006654868.1 hypersensitive-induced response protein 1                                     |
| TCONS_00005289 | -1.483   | -0.0610577 | -0.730237 | BGIOSGA028060 | XP_015696591.1 probable acyl-activating enzyme 1, peroxisomal                                |
| TCONS_00000665 | -1.48104 | -1.95455   | -0.680352 | BGIOSGA018944 | XP_006644059.1 cyclic dof factor 2-like                                                      |
| TCONS_00032763 | -1.48022 | -0.148048  | -0.7541   | BGIOSGA035191 | XP_006662099.1 PREDICTED: uncharacterized protein LOC102722052                               |
| TCONS_00000393 | -1.47978 | -0.881728  | -1.38721  | BGIOSGA002971 | XP_004968580.1 eukaryotic translation initiation factor 3 subunit D                          |
| TCONS_00023854 | -1.47952 | -1.63454   | -1.1138   | BGIOSGA028169 | XP_006657797.1 putative receptor-like protein kinase At4g00960                               |
| TCONS_00011396 | -1.47933 | -0.726395  | -1.53263  | BGIOSGA003789 | XP_015690373.1 hexose carrier protein HEX6-like                                              |
| TCONS_00012213 | -1.47844 | -1.82783   | -0.499491 | BGIOSGA026398 | XP_006650044.1 serine/threonine-protein kinase AtPK2/AtPK19-like                             |
| TCONS_00006681 | -1.47828 | -0.150819  | -0.847262 | BGIOSGA020859 | XP_022680824.1 auxin response factor 12                                                      |
| TCONS_00011202 | -1.4782  | -0.0984744 | -0.962981 | BGIOSGA013803 | XP_015691121.1 E3 ubiquitin-protein ligase RNF126-A-like                                     |
| TCONS_00008105 | -1.47769 | -2.61825   | -1.97598  | BGIOSGA002617 | XP_015688618.1 E3 ubiquitin-protein ligase Os03g0188200-like                                 |

transcriptome

|                |          |           |           |               |                                                                                                           |
|----------------|----------|-----------|-----------|---------------|-----------------------------------------------------------------------------------------------------------|
| TCONS_00014734 | -1.47534 | -3.65667  | -0.670525 | BGIOSGA030936 | XP_003563120.1rop guanine nucleotide exchange factor 3                                                    |
| TCONS_00015944 | -1.47519 | -1.65686  | -4.25586  | BGIOSGA015032 | XP_002447884.1putative FBD-associated F-box protein At5g38570                                             |
| TCONS_00026682 | -1.47492 | -2.33528  | -1.93462  | BGIOSGA035935 | XP_015696557.1 AP2-like ethylene-responsive transcription factor At1g16060                                |
| TCONS_00012256 | -1.47393 | -3.60124  | -0.593232 | BGIOSGA030609 | XP_006650072.1 pollen-specific leucine-rich repeat extensin-like protein 1                                |
| TCONS_00033642 | -1.47386 | -2.07357  | -0.7673   | BGIOSGA035425 | XP_015697692.1 uncharacterized aarF domain-containing protein kinase 1                                    |
| TCONS_00031648 | -1.47381 | -1.57056  | -1.81753  | BGIOSGA033470 | XP_002453145.2putative F-box protein At2g02030                                                            |
| TCONS_00002452 | -1.47345 | -0.57159  | -0.559741 | BGIOSGA005094 | XP_006645268.1 histone-lysine N-methyltransferase, H3 lysine-9 specific SUVH4-like                        |
| TCONS_00025849 | -1.4734  | -1.2131   | -1.44459  | BGIOSGA013788 | XP_006659083.2 uncharacterized membrane protein YuiD-like                                                 |
| TCONS_00030208 | -1.47274 | -0.437548 | -2.38746  | BGIOSGA029601 | XP_004957213.1putative wall-associated receptor kinase-like 16                                            |
| TCONS_00007266 | -1.47156 | -2.15023  | -0.523078 | BGIOSGA018203 | XP_006646808.1 serine/arginine-rich splicing factor RS41 isoform X1                                       |
| TCONS_00013598 | -1.4715  | -0.923111 | -2.00716  | BGIOSGA001846 | XP_006652064.1 probable glucuronosyltransferase Os04g0103100                                              |
| TCONS_00023981 | -1.47092 | 0.394272  | 0.41317   | BGIOSGA011151 | XP_003562821.2protein indeterminate-domain 1                                                              |
| TCONS_00016550 | -1.46955 | -2.95886  | -2.04303  | BGIOSGA023255 | XP_006652759.1 growth-regulating factor 3-like                                                            |
| TCONS_00000368 | -1.46831 | -0.680312 | -0.46114  | BGIOSGA036662 | XP_006645602.1 cytochrome P450 90D2                                                                       |
| TCONS_00026718 | -1.46817 | -2.04024  | -0.741014 | BGIOSGA004752 | XP_015695985.1 respiratory burst oxidase homolog protein E                                                |
| TCONS_00008389 | -1.4681  | -0.734732 | -0.463011 | BGIOSGA006032 | XP_006648841.1 polyribonucleotide nucleotidyltransferase 2, mitochondrial                                 |
| TCONS_00027632 | -1.46734 | -2.44707  | -1.51245  | BGIOSGA022639 | XP_006659967.2 protein CHROMATIN REMODELING 35-like                                                       |
| TCONS_00030660 | -1.46681 | -2.34813  | -1.49207  | BGIOSGA028616 | XP_006661617.1 putative disease resistance RPP13-like protein 3                                           |
| TCONS_00033967 | -1.46565 | -0.817335 | -0.200245 | BGIOSGA008708 | XP_015697839.1 pentatricopeptide repeat-containing protein At2g26790, mitochondrial-like                  |
| TCONS_00034339 | -1.46356 | -2.15234  | -1.10581  | BGIOSGA027813 | XP_006662749.1 protein YLS9-like                                                                          |
| TCONS_00022386 | -1.46279 | -2.27724  | -2.34325  | BGIOSGA021079 | XP_006657039.1PREDICTED: uncharacterized protein At1g04910-like                                           |
| TCONS_00015119 | -1.46244 | -1.27323  | -0.737328 | BGIOSGA017298 | XP_015691605.1 molybdopterin biosynthesis protein CNX1                                                    |
| TCONS_00028201 | -1.46225 | -0.957531 | -0.636383 | BGIOSGA021106 | XP_014757041.2uncharacterized protein LOC100840021                                                        |
| TCONS_00023363 | -1.46189 | 0.164005  | -1.17786  | BGIOSGA025405 | XP_006657566.1PREDICTED: uncharacterized protein LOC102717355                                             |
| TCONS_00026058 | -1.4614  | -1.91335  | #NA       | BGIOSGA028128 | XP_004951863.1uncharacterized protein LOC101762879                                                        |
| TCONS_00031718 | -1.46111 | -3.6401   | -1.11997  | BGIOSGA021572 | XP_004983464.1peroxidase A2                                                                               |
| TCONS_00023132 | -1.4598  | -0.108514 | -0.85273  | BGIOSGA017054 | XP_009408527.1 outer envelope membrane protein 7                                                          |
| TCONS_00036575 | -1.4598  | 1.54356   | 0.884236  | BGIOSGA019597 | XP_006663758.2PREDICTED: uncharacterized protein LOC102708666                                             |
| TCONS_00022485 | -1.45824 | -0.918292 | -0.441517 | #N/A          | #N/A                                                                                                      |
| TCONS_00003647 | -1.45763 | 0.408589  | -0.124401 | BGIOSGA001558 | XP_006665113.1 tetatricopeptide repeat protein 5-like                                                     |
| TCONS_00007134 | -1.45715 | -0.837716 | -1.4819   | BGIOSGA015122 | XP_015689115.1 U-box domain-containing protein 33-like                                                    |
| TCONS_00005095 | -1.45648 | -0.882363 | -0.127248 | BGIOSGA010253 | XP_015692139.1 protein OSB2, chloroplastic-like                                                           |
| TCONS_00009083 | -1.45617 | -0.804746 | -1.19214  | BGIOSGA005322 | XP_015689100.1PREDICTED: uncharacterized protein LOC102704126                                             |
| TCONS_00014089 | -1.45577 | 0.779708  | 0.434892  | BGIOSGA020673 | XP_021321789.1uncharacterized protein LOC8074283                                                          |
| TCONS_00010561 | -1.45533 | -2.46877  | -3.0687   | BGIOSGA000727 | XP_015691131.1PREDICTED: uncharacterized protein LOC102710677                                             |
| TCONS_00003272 | -1.45382 | -1.92498  | #NA       | #N/A          | #N/A                                                                                                      |
| TCONS_00034566 | -1.45379 | -0.645004 | -2.38376  | BGIOSGA007130 | XP_015697529.1 receptor-like protein kinase HSL1                                                          |
| TCONS_00013791 | -1.45111 | #NA       | -1.45894  | #N/A          | #N/A                                                                                                      |
| TCONS_00000524 | -1.44977 | -3.18763  | -2.98599  | BGIOSGA018446 | XP_006643973.1 D-amino-acid transaminase, chloroplastic-like                                              |
| TCONS_00021542 | -1.44951 | -0.415273 | -0.351641 | BGIOSGA014991 | XP_010491788.1 histone H3.3                                                                               |
| TCONS_00009585 | -1.44869 | -0.825178 | -1.49574  | BGIOSGA018258 | XP_015691676.1PREDICTED: uncharacterized protein LOC102716210 isoform X3                                  |
| TCONS_00019654 | -1.44849 | -1.45119  | -1.49274  | BGIOSGA009712 | XP_006654676.1 reticulon-like protein B1                                                                  |
| TCONS_00005885 | -1.44743 | -0.897159 | -0.361369 | BGIOSGA014663 | XP_002451987.2L-type lectin-domain containing receptor kinase IV.2                                        |
| TCONS_00028346 | -1.44732 | 0.387576  | -0.468152 | #N/A          | #N/A                                                                                                      |
| TCONS_00008388 | -1.44702 | -1.43533  | -2.54141  | BGIOSGA006033 | XP_004953115.1serine/threonine protein phosphatase 2A 55 kDa regulatory subunit B beta isoform isoform X1 |
| TCONS_00004006 | -1.44648 | -2.11593  | -0.752738 | BGIOSGA001185 | XP_006646117.1PREDICTED: uncharacterized protein LOC102715814                                             |
| TCONS_00014203 | -1.445   | -0.192571 | -1.63896  | BGIOSGA013242 | XP_006652263.1 glucan endo-1,3-beta-glucosidase 14-like                                                   |
| TCONS_00011495 | -1.44497 | 0.64742   | -0.473834 | #N/A          | #N/A                                                                                                      |
| TCONS_00002721 | -1.4449  | -4.07258  | -2.39923  | BGIOSGA030418 | XP_006643718.1 protein O-linked-mannose beta-1,4-N-acetylglucosaminyltransferase 2-like                   |
| TCONS_00026472 | -1.44279 | -0.940485 | -1.47919  | BGIOSGA028541 | XP_015695579.1PREDICTED: uncharacterized protein LOC107304721, partial                                    |
| TCONS_00030477 | -1.44279 | #NA       | -1.47919  | BGIOSGA031191 | XP_006660936.1 auxin-responsive protein SAUR36-like                                                       |
| TCONS_00017153 | -1.44166 | -3.19676  | -1.96913  | BGIOSGA019199 | XP_006654058.2 villin-1-like                                                                              |
| TCONS_00004734 | -1.43953 | -3.45303  | -2.66467  | BGIOSGA017328 | XP_006645024.1 reticulon-like protein B12 isoform X2                                                      |

transcriptome

|                |          |           |           |               |                                                                                                |
|----------------|----------|-----------|-----------|---------------|------------------------------------------------------------------------------------------------|
| TCONS_00012882 | -1.4394  | -3.29308  | -2.04081  | BGIOSGA035439 | XP_002464115.1 protein MARD1                                                                   |
| TCONS_00013936 | -1.43928 | -1.08665  | 0.229254  | BGIOSGA024728 | XP_006653259.1 probable ribose-5-phosphate isomerase 1                                         |
| TCONS_00030998 | -1.43903 | -1.79151  | -1.71638  | BGIOSGA033780 | XP_006665052.2 probable LRR receptor-like serine/threonine-protein kinase At3g47570            |
| TCONS_00036667 | -1.4388  | -1.2503   | -0.777073 | BGIOSGA034506 | XP_006663811.1 suppressor of mec-8 and unc-52 protein homolog 2                                |
| TCONS_00018101 | -1.43846 | -1.40444  | -0.941931 | BGIOSGA000727 | XP_008648000.1 uncharacterized LOC100304390 isoform X1                                         |
| TCONS_00015849 | -1.43766 | -1.72355  | -1.32572  | BGIOSGA003082 | XP_006652254.1 serine/threonine-protein kinase D6PK-like                                       |
| TCONS_00021638 | -1.43699 | -0.947969 | 0.313939  | BGIOSGA029169 | XP_015696453.1 dihydroneopterin aldolase 2-like                                                |
| TCONS_00032197 | -1.4359  | -1.92075  | -1.73947  | BGIOSGA035853 | XP_006661768.1 histone-lysine N-methyltransferase ATXR4                                        |
| TCONS_00011430 | -1.43527 | #NA       | -0.497612 | #N/A          | #N/A                                                                                           |
| TCONS_00015728 | -1.43468 | -0.107879 | -2.05251  | BGIOSGA035706 | XP_006653304.2 wall-associated receptor kinase 2-like                                          |
| TCONS_00014885 | -1.43366 | -2.95202  | -1.50157  | #N/A          | #N/A                                                                                           |
| TCONS_00030715 | -1.43347 | -1.56125  | -0.80692  | BGIOSGA030033 | XP_015691931.1 UPF0481 protein At3g47200-like                                                  |
| TCONS_00031027 | -1.43223 | -1.96042  | -0.850878 | BGIOSGA028420 | XP_021307139.1 uncharacterized protein LOC8080432 isoform X4                                   |
| TCONS_00001113 | -1.43142 | 1.95221   | 1.30027   | BGIOSGA030264 | XP_004968948.2 DEAD-box ATP-dependent RNA helicase 15                                          |
| TCONS_00011800 | -1.43128 | 0.487831  | -1.30547  | BGIOSGA030469 | XP_006649643.1 sugar transport protein 13                                                      |
| TCONS_00036424 | -1.42986 | -2.3277   | -2.92975  | BGIOSGA010161 | XP_024319293.1 wall-associated receptor kinase 5                                               |
| TCONS_00025341 | -1.42937 | -0.372088 | -1.51218  | BGIOSGA020130 | XP_021318493.1 E3 ubiquitin-protein ligase PUB23                                               |
| TCONS_00035251 | -1.42937 | #NA       | -1.51218  | #N/A          | #N/A                                                                                           |
| TCONS_00028717 | -1.42872 | 0.364142  | -0.928824 | BGIOSGA033529 | XP_004960354.1 chromosome transmission fidelity protein 8                                      |
| TCONS_00012958 | -1.42872 | -1.95779  | #NA       | #N/A          | #N/A                                                                                           |
| TCONS_00014663 | -1.42845 | -2.07508  | -1.77773  | BGIOSGA017377 | XP_015691317.1 probable LRR receptor-like serine/threonine-protein kinase At1g63430 isoform X2 |
| TCONS_00016065 | -1.42809 | -1.22153  | -0.515352 | BGIOSGA014913 | XP_006652396.2 protein FATTY ACID EXPORT 1, chloroplastic-like                                 |
| TCONS_00002260 | -1.42807 | -1.7274   | 0.212575  | BGIOSGA005586 | XP_006646518.2 protein NRT1/ PTR FAMILY 5.10-like                                              |
| TCONS_00011413 | -1.42748 | -2.70204  | -0.459507 | BGIOSGA033413 | XP_006649230.1 PREDICTED: uncharacterized protein LOC102700872                                 |
| TCONS_00022690 | -1.42747 | #NA       | -1.51687  | BGIOSGA004834 | NP_001145346.1 uncharacterized LOC100278675 precursor                                          |
| TCONS_00026173 | -1.4273  | -4.28752  | -1.13079  | BGIOSGA023532 | XP_015695535.1 xyloglucan endotransglycosylase/hydrolase protein 8                             |
| TCONS_00002015 | -1.42688 | -0.737454 | -0.78139  | #N/A          | #N/A                                                                                           |
| TCONS_00014351 | -1.4263  | #NA       | -1.5198   | BGIOSGA016507 | XP_006652342.1 UPF0483 protein AGAP003155-like                                                 |
| TCONS_00025389 | -1.4263  | 0.846866  | #NA       | #N/A          | #N/A                                                                                           |
| TCONS_00028416 | -1.42575 | 0.188461  | -0.775705 | BGIOSGA032579 | XP_008812461.1 molybdenum cofactor sulfurase 3-like                                            |
| TCONS_00028279 | -1.42517 | #NA       | -2.52257  | BGIOSGA014721 | XP_003572368.2 beta-glucosidase 28                                                             |
| TCONS_00026928 | -1.42517 | 1.20821   | 0.0623904 | BGIOSGA023829 | XP_015694480.1 probable mediator of RNA polymerase II transcription subunit 26b                |
| TCONS_00024408 | -1.42512 | -1.67929  | -1.37485  | BGIOSGA026447 | XP_015694778.1 PREDICTED: uncharacterized protein LOC102719885                                 |
| TCONS_00019903 | -1.42453 | -2.81169  | -1.34501  | BGIOSGA002421 | XP_004961036.3 transcription factor SRM1                                                       |
| TCONS_00036089 | -1.42444 | -1.17308  | -0.795132 | BGIOSGA006744 | XP_006664050.1 cyclic pyranopterin monophosphate synthase, mitochondrial                       |
| TCONS_00031280 | -1.4236  | 0.0365862 | #NA       | BGIOSGA020796 | XP_008644805.1 uncharacterized protein LOC103626189                                            |
| TCONS_00020475 | -1.42323 | -1.64529  | -0.392101 | BGIOSGA022654 | XP_015694111.1 PREDICTED: uncharacterized protein LOC102699416 isoform X1                      |
| TCONS_00012442 | -1.42316 | -0.541057 | 0.337385  | #N/A          | #N/A                                                                                           |
| TCONS_00025286 | -1.4231  | 0.036056  | 0.472293  | BGIOSGA024140 | XP_002462978.1 trinucleotide repeat-containing gene 18 protein                                 |
| TCONS_00036969 | -1.4227  | -1.35763  | -2.01413  | BGIOSGA003930 | XP_021321955.1 disease resistance protein RPM1                                                 |
| TCONS_00006778 | -1.42179 | -1.52725  | -1.90298  | BGIOSGA008951 | XP_006647814.1 KH domain-containing protein At5g56140-like                                     |
| TCONS_00016251 | -1.42037 | #NA       | -1.53448  | BGIOSGA014723 | XP_015692291.1 beta-glucosidase 16-like isoform X1                                             |
| TCONS_00014619 | -1.42037 | 0.355106  | 1.63544   | #N/A          | #N/A                                                                                           |
| TCONS_00004839 | -1.41995 | -2.28919  | -1.85745  | BGIOSGA027558 | XP_002438208.2 transcription factor TGAL3                                                      |
| TCONS_00011265 | -1.41849 | -1.01608  | -0.1681   | BGIOSGA005972 | XP_006650842.1 PREDICTED: uncharacterized protein LOC102721256                                 |
| TCONS_00017544 | -1.41839 | -0.383947 | #NA       | BGIOSGA033086 | XP_004961229.1 homeobox-DDT domain protein RLT2                                                |
| TCONS_00007479 | -1.41803 | 1.83806   | 0.0446263 | BGIOSGA007681 | NP_001149805.1 CUE domain containing protein                                                   |
| TCONS_00034149 | -1.41803 | -1.9693   | #NA       | BGIOSGA040457 | XP_006664874.2 biogenesis of lysosome-related organelles complex 1 subunit 1-like              |
| TCONS_00026424 | -1.41769 | -1.95515  | -2.21898  | BGIOSGA026350 | XP_004972482.1 probable serine/threonine-protein kinase At1g54610                              |
| TCONS_00004547 | -1.41666 | 1.93612   | 0.456191  | BGIOSGA000661 | XP_015688081.1 PREDICTED: uncharacterized protein LOC102706146 isoform X1                      |
| TCONS_00034427 | -1.41648 | -1.28902  | -1.30575  | BGIOSGA034060 | XP_004980237.1 protein ACCELERATED CELL DEATH 6 isoform X1                                     |
| TCONS_00028560 | -1.41633 | 0.531381  | -0.129593 | #N/A          | #N/A                                                                                           |
| TCONS_00025846 | -1.41609 | -2.23677  | -0.240956 | BGIOSGA030559 | XP_004983906.1 zinc finger CCCH domain-containing protein 54                                   |
| TCONS_00002037 | -1.41556 | -0.942463 | -1.42018  | BGIOSGA037085 | XP_006644885.1 transcription factor GAMYB                                                      |



transcriptome

|                |          |            |             |               |                                                                                                     |
|----------------|----------|------------|-------------|---------------|-----------------------------------------------------------------------------------------------------|
| TCONS_00029895 | -1.41541 | -0.97212   | -0.546985   | BGIOSGA013188 | XP_021308134.1 putative leucine-rich repeat receptor-like serine/threonine-protein kinase At2g04300 |
| TCONS_00019339 | -1.41514 | -1.56446   | -2.6206     | BGIOSGA025019 | XP_006654434.1 potassium channel AKT2 isoform X1                                                    |
| TCONS_00016007 | -1.41491 | 0.158804   | -0.693827   | BGIOSGA002099 | XP_006653479.2 somatic embryogenesis receptor kinase 1-like                                         |
| TCONS_00002996 | -1.41482 | #NA        | -0.226538   | BGIOSGA016346 | XP_021319432.1 uncharacterized protein LOC8075267                                                   |
| TCONS_00001488 | -1.41482 | #NA        | 0.451534    | #N/A          | #N/A                                                                                                |
| TCONS_00013885 | -1.41477 | -0.314852  | -2.22037    | BGIOSGA035852 | XP_006653242.1 wall-associated receptor kinase 5-like                                               |
| TCONS_00026763 | -1.41399 | -1.97365   | -1.55057    | BGIOSGA005241 | XP_015695441.1 transcription factor bHLH149-like                                                    |
| TCONS_00012703 | -1.41373 | -0.388979  | 0.256116    | BGIOSGA010263 | XP_015690615.1 F-box-like/WD repeat-containing protein TBL1X                                        |
| TCONS_00009758 | -1.41347 | 0.466349   | 0.0330674   | #N/A          | #N/A                                                                                                |
| TCONS_00026574 | -1.41296 | -0.752381  | -3.13813    | BGIOSGA028636 | XP_006652173.1 50S ribosomal protein L27-like                                                       |
| TCONS_00002137 | -1.41296 | 0.832582   | 0.0317969   | #N/A          | #N/A                                                                                                |
| TCONS_00035675 | -1.41272 | 0.609922   | #NA         | #N/A          | #N/A                                                                                                |
| TCONS_00036550 | -1.41225 | -1.97556   | 0.766952    | BGIOSGA034623 | NP_001151353.2 RING-H2 finger protein ATL3F                                                         |
| TCONS_00022896 | -1.4118  | -0.976067  | -2.55612    | #N/A          | #N/A                                                                                                |
| TCONS_00035503 | -1.41137 | 1.60841    | 0.764706    | BGIOSGA003050 | XP_006664297.2 PREDICTED: uncharacterized protein LOC102709420                                      |
| TCONS_00029208 | -1.41116 | -0.97679   | 0.2496      | BGIOSGA028881 | XP_015696610.1 PREDICTED: uncharacterized protein LOC102700366                                      |
| TCONS_00016402 | -1.41096 | -1.39206   | -0.973315   | BGIOSGA014564 | XP_015692235.1 PREDICTED: uncharacterized protein LOC107304136                                      |
| TCONS_00004626 | -1.41056 | -0.392511  | 0.762639    | #N/A          | #N/A                                                                                                |
| TCONS_00012101 | -1.4104  | -2.18324   | -1.737      | BGIOSGA036631 | XP_006649941.1 probable xyloglucan 6-xylosyltransferase 1                                           |
| TCONS_00025944 | -1.40969 | -4.87246   | -4.12966    | BGIOSGA028019 | XP_015695903.1 protein CCA1 isoform X1                                                              |
| TCONS_00008283 | -1.40944 | -3.34131   | -3.20846    | BGIOSGA031098 | XP_015688626.1 putative UDP-rhamnose:rhamnosyltransferase 1                                         |
| TCONS_00008482 | -1.40918 | -1.7474    | -1.83258    | BGIOSGA005943 | XP_015698129.1 magnesium/proton exchanger 1                                                         |
| TCONS_00037082 | -1.40771 | -2.98077   | -1.5665     | #N/A          | #N/A                                                                                                |
| TCONS_00007253 | -1.4069  | -0.981744  | -0.568556   | BGIOSGA007230 | XP_015689670.1 protein Simiate                                                                      |
| TCONS_00008991 | -1.40641 | 1.18758    | -1.56982    | #N/A          | #N/A                                                                                                |
| TCONS_00032568 | -1.40594 | #NA        | -0.834028   | BGIOSGA025050 | NP_001143412.2 uncharacterized LOC100276059                                                         |
| TCONS_00010957 | -1.40583 | -1.44248   | -1.12382    | BGIOSGA019740 | XP_015690897.1 SRSF protein kinase 2-like                                                           |
| TCONS_00014011 | -1.40561 | -1.98331   | -0.919752   | BGIOSGA004029 | XP_015691756.1 dCTP pyrophosphatase 1-like                                                          |
| TCONS_00016058 | -1.4055  | -0.864146  | -3.10815    | BGIOSGA020163 | XP_006653507.1 PREDICTED: uncharacterized protein LOC102702466                                      |
| TCONS_00031794 | -1.40499 | 0.430966   | 0.0115782   | BGIOSGA022235 | XP_006656595.1 LRR receptor-like serine/threonine-protein kinase ERL1                               |
| TCONS_00036175 | -1.4048  | -0.814386  | -1.45839    | BGIOSGA037532 | XP_006664083.2 PREDICTED: uncharacterized protein LOC102714792                                      |
| TCONS_00024527 | -1.40434 | -0.762487  | -1.15999    | BGIOSGA024864 | XP_004956165.1 probable UDP-3-O-acylglucosamine N-acyltransferase 2, mitochondrial isoform X1       |
| TCONS_00014408 | -1.40425 | 1.01501    | 0.594676    | #N/A          | #N/A                                                                                                |
| TCONS_00002984 | -1.40336 | -1.9861    | 1.96683     | BGIOSGA003959 | XP_002440727.1 probable WRKY transcription factor 50                                                |
| TCONS_00012777 | -1.40336 | 0.428938   | -1.16245    | BGIOSGA022197 | XP_003578091.1 plant UBX domain-containing protein 2                                                |
| TCONS_00006560 | -1.40336 | -0.9861    | #NA         | #N/A          | #N/A                                                                                                |
| TCONS_00022231 | -1.40247 | #NA        | #NA         | BGIOSGA018396 | XP_015693899.1 B-cell receptor-associated protein 31                                                |
| TCONS_00026495 | -1.40091 | -1.67509   | -1.98574    | BGIOSGA002510 | XP_006643674.1 glycerophosphodiester phosphodiesterase protein kinase domain-containing GDPDL2-like |
| TCONS_00032680 | -1.40073 | -4.31135   | -2.90602    | BGIOSGA011669 | XP_006662046.1 expansin-B2                                                                          |
| TCONS_00012604 | -1.40064 | -1.18218   | -3.58431    | BGIOSGA013015 | XP_015689958.1 GDSL esterase/lipase At5g55050-like                                                  |
| TCONS_00017626 | -1.40064 | -0.530104  | 0.000655194 | BGIOSGA019688 | XP_006654295.1 CAAX prenyl protease 2                                                               |
| TCONS_00014623 | -1.4002  | -1.79745   | -0.222849   | BGIOSGA008665 | XP_009385658.1 PREDICTED: uncharacterized protein At2g24330                                         |
| TCONS_00037474 | -1.40008 | #NA        | 0.321189    | BGIOSGA019301 | XP_004963100.1 auxin-responsive protein IAA30                                                       |
| TCONS_00004397 | -1.3995  | -2.72795   | -0.587159   | BGIOSGA018558 | XP_006644710.1 coiled-coil domain-containing protein 25-like                                        |
| TCONS_00001634 | -1.39922 | 0.00867179 | 0.0751198   | BGIOSGA032331 | XP_006646238.1 mitogen-activated protein kinase kinase kinase ANP1-like                             |
| TCONS_00030147 | -1.39871 | -4.31391   | -1.74113    | BGIOSGA034368 | XP_006660677.1 1-aminocyclopropane-1-carboxylate oxidase 1                                          |
| TCONS_00014332 | -1.39868 | -0.992012  | -3.17416    | BGIOSGA032434 | XP_006652337.2 non-functional NADPH-dependent codeinone reductase 2-like                            |
| TCONS_00004935 | -1.39861 | -2.19856   | -1.24834    | BGIOSGA035861 | XP_006645201.1 PREDICTED: uncharacterized protein LOC102718506                                      |
| TCONS_00014213 | -1.39851 | -3.57719   | -0.087117   | BGIOSGA008366 | XP_004975580.1 mitochondrial fission protein ELM1 isoform X1                                        |
| TCONS_00032694 | -1.39842 | -1.99234   | -0.174812   | BGIOSGA031416 | XP_015697256.1 S-norocoumarin synthase 1-like isoform X1                                            |
| TCONS_00011149 | -1.39791 | 1.02692    | 0.368254    | BGIOSGA025317 | XP_006650743.1 PREDICTED: uncharacterized protein LOC102715558                                      |
| TCONS_00032146 | -1.39782 | -0.0112485 | -1.32831    | BGIOSGA013840 | XP_006661741.1 serine/threonine-protein kinase At5g01020-like                                       |
| TCONS_00002078 | -1.39776 | -0.993171  | -0.212965   | BGIOSGA028353 | XP_015693672.1 uncharacterized membrane protein At1g06890-like isoform X2                           |
| TCONS_00001803 | -1.39755 | -3.99344   | -0.132569   | BGIOSGA002928 | XP_024315961.1 protein IQ-DOMAIN 14 isoform X3                                                      |
| TCONS_00000330 | -1.39753 | -1.14546   | -1.59204    | BGIOSGA012348 | XP_006643847.1 polynucleotide 5'-hydroxyl-kinase NOL9-like                                          |

transcriptome

|                |          |             |            |               |                                                                                                     |
|----------------|----------|-------------|------------|---------------|-----------------------------------------------------------------------------------------------------|
| TCONS_00007784 | -1.39731 | -1.06086    | -1.35159   | BGIOSGA000686 | XP_006647157.1 transcription factor bHLH133-like                                                    |
| TCONS_00019490 | -1.39731 | -3.99374    | #NA        | BGIOSGA029984 | XP_004969770.1 probable sulfate transporter 3.5                                                     |
| TCONS_00022620 | -1.39728 | -1.50835    | -2.32964   | BGIOSGA020821 | XP_004965797.1 uncharacterized membrane protein At1g16860 isoform X1                                |
| TCONS_00033051 | -1.39717 | -1.11944    | -0.370541  | BGIOSGA022197 | XP_014757850.2 uncharacterized protein LOC106866713                                                 |
| TCONS_00029931 | -1.39715 | -1.73091    | -0.32997   | BGIOSGA032130 | XP_002468294.1 UDP-glucose flavonoid 3-O-glucosyltransferase 7                                      |
| TCONS_00009366 | -1.39691 | -2.5792     | -0.178544  | BGIOSGA002256 | XP_015690509.1 probable indole-3-pyruvate monooxygenase YUCCA1 isoform X1                           |
| TCONS_00005950 | -1.39677 | -0.409452   | -0.48701   | BGIOSGA025656 | XP_006648586.1 obtusifoliol 14-alpha demethylase-like                                               |
| TCONS_00021369 | -1.39661 | -1.10154    | -3.40169   | BGIOSGA003500 | XP_006657340.2 alpha-amylase isozyme 2A-like                                                        |
| TCONS_00011135 | -1.39654 | -1.52121    | -0.542142  | BGIOSGA013734 | XP_006651910.1 histone H1-like                                                                      |
| TCONS_00037442 | -1.39641 | -0.554295   | -0.272889  | BGIOSGA023700 | XP_006664691.1 cytoplasmic tRNA 2-thiolation protein 2                                              |
| TCONS_00004000 | -1.39624 | -2.2402     | -1.34733   | BGIOSGA026166 | XP_006646112.1 hydroquinone glucosyltransferase-like                                                |
| TCONS_00000302 | -1.39619 | -5.45458    | -2.24745   | BGIOSGA034320 | XP_021310923.1 coleoptile phototropism protein 1                                                    |
| TCONS_00002939 | -1.39598 | -1.73238    | -0.21738   | BGIOSGA020418 | XP_006643817.1 probable prolyl 4-hydroxylase 6                                                      |
| TCONS_00032579 | -1.39595 | 0.66751     | -4.18093   | BGIOSGA031535 | XP_003571979.2 probable trehalase                                                                   |
| TCONS_00034104 | -1.39591 | -4.80285    | -3.40341   | BGIOSGA000508 | XP_006663136.1 laccase-22                                                                           |
| TCONS_00036119 | -1.39587 | 1.14741     | -1.37376   | BGIOSGA033091 | XP_004962885.1 zinc finger CCCH domain-containing protein 67                                        |
| TCONS_00015985 | -1.39547 | -0.551272   | -0.519153  | BGIOSGA014994 | XP_006652341.1 uncharacterized membrane protein At3g27390                                           |
| TCONS_00027181 | -1.39515 | -1.05786    | -0.860977  | BGIOSGA031125 | XP_006659015.1 flap endonuclease GEN-like 2                                                         |
| TCONS_00003786 | -1.39507 | -1.58152    | -3.18309   | BGIOSGA001425 | XP_014757678.1 DUF724 domain-containing protein 3 isoform X1                                        |
| TCONS_00018408 | -1.39492 | -1.85633    | -3.69061   | BGIOSGA024641 | XP_006655642.1 RNA polymerase sigma factor sigE, chloroplastic/mitochondrial                        |
| TCONS_00014281 | -1.39461 | -0.827209   | 0.258709   | BGIOSGA016910 | XP_006652296.1 subtilisin-like protease SBT1.7                                                      |
| TCONS_00014198 | -1.39239 | -0.396073   | -0.789707  | BGIOSGA004836 | XP_006652261.2 PREDICTED: uncharacterized protein LOC102701162                                      |
| TCONS_00013388 | -1.38492 | -0.00936339 | -0.0329883 | BGIOSGA025378 | XP_006650770.1 sugar phosphate exchanger 3-like                                                     |
| TCONS_00016502 | -1.38276 | -0.365112   | -1.04305   | BGIOSGA022213 | XP_015691879.1 PREDICTED: uncharacterized protein LOC102718260                                      |
| TCONS_00030903 | -1.38276 | -2.19263    | -3.23597   | BGIOSGA001335 | XP_006661699.1 UPF0301 protein TC_0483                                                              |
| TCONS_00002188 | -1.38216 | 0.15043     | 0.12002    | BGIOSGA028586 | XP_006645038.1 PREDICTED: uncharacterized protein LOC102718225                                      |
| TCONS_00002709 | -1.38173 | -1.30099    | -1.48502   | BGIOSGA002514 | XP_006643674.1 glycerophosphodiester phosphodiesterase protein kinase domain-containing GDPDL2-like |
| TCONS_00027818 | -1.38123 | -0.599138   | -0.654643  | BGIOSGA000224 | XP_006660046.2 60S ribosomal protein L7a                                                            |
| TCONS_00036964 | -1.37871 | -3.40003    | -0.44009   | BGIOSGA000716 | XP_015689790.1 ABC transporter B family member 19-like                                              |
| TCONS_00025723 | -1.37856 | -1.30311    | -1.38595   | BGIOSGA023457 | XP_015694971.1 NAC domain-containing protein 92-like                                                |
| TCONS_00019630 | -1.37813 | -0.360089   | -0.389364  | BGIOSGA020191 | XP_006654648.1 acetyltransferase NSI                                                                |
| TCONS_00006734 | -1.37757 | -1.81134    | -1.97008   | BGIOSGA021523 | XP_015689062.1 putative receptor-like protein kinase At4g00960                                      |
| TCONS_00021644 | -1.37706 | -2.37142    | -3.63432   | BGIOSGA021769 | XP_004964810.13'-N-debenzoyl-2'-deoxytaxol N-benzoyltransferase                                     |
| TCONS_00021880 | -1.37579 | -1.62315    | -1.63643   | BGIOSGA035484 | XP_004953948.1 ethylene-responsive transcription factor RAP2-4                                      |
| TCONS_00005035 | -1.37552 | -0.619178   | -0.222555  | BGIOSGA018187 | XP_006645284.1 lysine-rich arabinogalactan protein 19-like                                          |
| TCONS_00021197 | -1.37322 | -0.991544   | -0.939963  | BGIOSGA000410 | XP_006657218.2 protein STRUBBELIG-RECEPTOR FAMILY 3-like                                            |
| TCONS_00019438 | -1.37306 | -0.740919   | -1.33207   | BGIOSGA007812 | XP_006654513.1 probable monofunctional riboflavin biosynthesis protein RIBA 3, chloroplastic        |
| TCONS_00000173 | -1.37289 | -0.61829    | -1.09346   | BGIOSGA034487 | XP_003565134.160S ribosomal protein L26-1                                                           |
| TCONS_00004059 | -1.37235 | 0.876364    | -1.08928   | BGIOSGA001132 | XP_006644424.1 single-stranded DNA-binding protein, mitochondrial                                   |
| TCONS_00021156 | -1.37204 | 0.120784    | -0.0523411 | BGIOSGA037013 | XP_006656307.1 transmembrane 9 superfamily member 9-like                                            |
| TCONS_00036516 | -1.36992 | -1.23097    | -2.43912   | BGIOSGA014750 | XP_015699009.1 caffeoylshikimate esterase-like                                                      |
| TCONS_00007842 | -1.36703 | -1.35727    | -2.32769   | BGIOSGA019941 | XP_006647194.1 bidirectional sugar transporter SWEET4                                               |
| TCONS_00033571 | -1.36673 | -1.8402     | -1.7196    | BGIOSGA022940 | XP_015699017.1 obtusifoliol 14-alpha demethylase                                                    |
| TCONS_00013108 | -1.36616 | -1.86661    | -3.87895   | BGIOSGA009622 | XP_006650534.1 transcription factor bHLH74-like isoform X2                                          |
| TCONS_00023387 | -1.36536 | -1.63191    | -0.159325  | BGIOSGA014675 | XP_015694575.1 AP2-like ethylene-responsive transcription factor TOE3                               |
| TCONS_00002612 | -1.36493 | -2.40613    | -1.42773   | BGIOSGA005251 | XP_006645339.1 probable aspartyl aminopeptidase                                                     |
| TCONS_00014646 | -1.36379 | -0.944946   | -1.52559   | BGIOSGA000463 | XP_004976316.1 RNA polymerase II C-terminal domain phosphatase-like 1 isoform X1                    |
| TCONS_00005628 | -1.36356 | -0.443618   | -0.663006  | BGIOSGA015622 | XP_006648429.2 putative disease resistance RPP13-like protein 3                                     |
| TCONS_00028684 | -1.36272 | -0.104156   | -0.12181   | BGIOSGA030431 | XP_015696744.1 SURP and G-patch domain-containing protein 1-like protein                            |
| TCONS_00024353 | -1.3627  | -1.59248    | -0.964198  | BGIOSGA032557 | XP_015694767.1 CBL-interacting protein kinase 29                                                    |
| TCONS_00022568 | -1.36258 | -1.0114     | -0.507131  | BGIOSGA007658 | XP_015693398.1 protein N-terminal asparagine amidohydrolase                                         |
| TCONS_00017555 | -1.36101 | -2.53258    | -1.42567   | BGIOSGA014673 | XP_006660481.1 cyclin-P4-1-like                                                                     |

transcriptome

|                |          |           |             |               |                                                                                                                              |
|----------------|----------|-----------|-------------|---------------|------------------------------------------------------------------------------------------------------------------------------|
| TCONS_00022923 | -1.36063 | -0.916064 | -0.453626   | BGIOSGA024128 | XP_024316444.1ubiquitin carboxyl-terminal hydrolase MINDY-1<br>XP_006648777.1PREDICTED: uncharacterized protein LOC102711408 |
| TCONS_00006316 | -1.35937 | -0.77917  | -2.33574    | BGIOSGA004016 |                                                                                                                              |
| TCONS_00023313 | -1.35926 | 0.46677   | 0.619665    | BGIOSGA025356 | XP_015695265.1 rRNA biogenesis protein RRP5                                                                                  |
| TCONS_00018960 | -1.3574  | -1.26745  | -1.67663    | BGIOSGA029407 | XP_006655145.1 protein HAPLESS 2-A-like<br>XP_015694754.1 gamma-glutamyltranspeptidase 3                                     |
| TCONS_00000221 | -1.3569  | -2.42124  | -2.32532    | BGIOSGA016058 |                                                                                                                              |
| TCONS_00002077 | -1.35679 | -5.40388  | -2.99798    | BGIOSGA029202 | XP_006644922.1 expansin-A2<br>XP_006652245.1 arogenate dehydratase/prephenate dehydratase 6, chloroplastic-like              |
| TCONS_00014185 | -1.35675 | -2.21284  | -2.62686    | BGIOSGA031527 | XP_006649824.1 probable protein phosphatase 2C 30                                                                            |
| TCONS_00011978 | -1.35648 | -0.953341 | -3.1374     | BGIOSGA021210 | XP_004951545.1glucan endo-1,3-beta-glucosidase 14                                                                            |
| TCONS_00007552 | -1.35526 | -1.3667   | -1.14169    | BGIOSGA010085 | XP_015691112.1 BEL1-like homeodomain protein 7                                                                               |
| TCONS_00011620 | -1.35523 | -1.36516  | -1.64288    | BGIOSGA018193 | XP_006661721.1 protein NRT1/ PTR FAMILY 8.3-like                                                                             |
| TCONS_00031688 | -1.35461 | -1.25214  | -1.30973    | BGIOSGA011158 | XP_004961534.1probable xyloglucan glycosyltransferase 7                                                                      |
| TCONS_00019615 | -1.3544  | 1.02895   | -0.557558   | BGIOSGA023300 | XP_006659092.1 60S acidic ribosomal protein P0                                                                               |
| TCONS_00034245 | -1.35436 | 0.523783  | -0.682115   | BGIOSGA027706 | XP_002462243.1L-type lectin-domain containing receptor kinase IX.1                                                           |
| TCONS_00028791 | -1.35415 | -1.21929  | -0.821208   | BGIOSGA003221 | XP_015693850.1 phospholipase D Z-like                                                                                        |
| TCONS_00022664 | -1.3535  | -1.61861  | -0.947836   | BGIOSGA020776 | XP_002463446.1phosphoinositide phospholipase C 2                                                                             |
| TCONS_00025758 | -1.3519  | -1.62271  | -1.3585     | BGIOSGA037594 | XP_006644932.1 protein NUCLEAR FUSION DEFECTIVE 4-like                                                                       |
| TCONS_00004648 | -1.35136 | 0.233122  | -0.508984   | BGIOSGA020043 | #N/A                                                                                                                         |
| TCONS_00027018 | -1.35063 | -0.377336 | -0.601909   | #N/A          | #N/A                                                                                                                         |
| TCONS_00018985 | -1.34998 | -0.318886 | -1.44235    | BGIOSGA036497 | XP_008652591.1uncharacterized protein LOC103632616                                                                           |
| TCONS_00033199 | -1.34987 | -1.51961  | -0.118634   | BGIOSGA034255 | XP_021316408.1uncharacterized protein LOC8071576 isoform X1                                                                  |
| TCONS_00021315 | -1.34895 | -2.17627  | -0.00828647 | BGIOSGA023545 | XP_006657294.1 choline monooxygenase, chloroplastic                                                                          |
| TCONS_00014755 | -1.34892 | -0.847204 | -0.975193   | BGIOSGA003161 | XP_021318855.1protein indeterminate-domain 5, chloroplastic                                                                  |
| TCONS_00000932 | -1.34891 | -0.642146 | -1.23353    | BGIOSGA003583 | XP_004965304.1protein DMP2                                                                                                   |
| TCONS_00018284 | -1.34715 | -0.87602  | -1.06137    | BGIOSGA013131 | XP_006654763.2 T-complex protein 1 subunit beta-like                                                                         |
| TCONS_00015089 | -1.34705 | -0.541871 | -1.17883    | BGIOSGA014196 | XP_006652937.1 G-type lectin S-receptor-like serine/threonine-protein kinase At1g34300                                       |
| TCONS_00019756 | -1.34521 | -0.713935 | -0.532306   | BGIOSGA037085 | XP_006654754.1 transcription factor RAX1-like                                                                                |
| TCONS_00035701 | -1.34518 | -0.833336 | -0.983117   | BGIOSGA004078 | XP_006664407.2PREDICTED: uncharacterized protein At1g04910-like                                                              |
| TCONS_00011823 | -1.34516 | -0.244499 | -1.64757    | BGIOSGA033518 | XP_015691059.1 glucan endo-1,3-beta-glucosidase 7-like isoform X1                                                            |
| TCONS_00012647 | -1.34491 | -0.843004 | -0.960164   | BGIOSGA008476 | XP_006651548.1 sugar carrier protein C-like                                                                                  |
| TCONS_00003189 | -1.34291 | -1.34519  | -0.965225   | BGIOSGA006602 | XP_006643983.1 C2 domain-containing protein At1g53590-like isoform X1                                                        |
| TCONS_00029487 | -1.34175 | -0.528915 | -0.529523   | BGIOSGA031241 | XP_004957593.1F-box/kelch-repeat protein At5g42360-like                                                                      |
| TCONS_00000258 | -1.34147 | -0.997968 | -1.65536    | BGIOSGA002838 | XP_003565373.1receptor-like protein 9DC3                                                                                     |
| TCONS_00036019 | -1.34008 | -1.41227  | 0.372513    | BGIOSGA027441 | XP_015695956.1 putative disease resistance protein RGA1                                                                      |
| TCONS_00007089 | -1.33924 | -1.60621  | -1.35298    | BGIOSGA009270 | XP_015689525.1 F-box protein PP2-B1-like                                                                                     |
| TCONS_00032314 | -1.33905 | -1.70225  | -0.765722   | BGIOSGA022026 | XP_006662400.1PREDICTED: uncharacterized protein LOC102702693, partial                                                       |
| TCONS_00024392 | -1.33682 | #NA       | #NA         | BGIOSGA028580 | XP_004958765.3nicotianamine synthase 3                                                                                       |
| TCONS_00021596 | -1.33618 | -1.99655  | -1.72366    | BGIOSGA024466 | XP_006655780.1 probable sulfate transporter 3.4                                                                              |
| TCONS_00018876 | -1.33612 | -0.932078 | -1.20875    | BGIOSGA021657 | XP_006655114.1 transcription factor bHLH68-like isoform X1                                                                   |
| TCONS_00021899 | -1.33602 | -0.214743 | -1.63774    | BGIOSGA033918 | XP_006656803.1 BRASSINOSTEROID INSENSITIVE 1-associated receptor kinase 1-like                                               |
| TCONS_00018518 | -1.33529 | -0.566493 | -0.754898   | BGIOSGA033516 | XP_015692414.1 serine/arginine-rich splicing factor RS2Z33 isoform X2                                                        |
| TCONS_00007369 | -1.33491 | -1.0267   | -1.21174    | BGIOSGA007102 | XP_006648317.2 receptor-like protein 2                                                                                       |
| TCONS_00018500 | -1.3346  | 0.52689   | -0.725387   | BGIOSGA018933 | XP_015692454.1 protein-tyrosine-phosphatase MKP1                                                                             |
| TCONS_00000301 | -1.33457 | 0.11037   | -0.212583   | BGIOSGA019266 | XP_003569538.4UDP-glycosyltransferase 73C1                                                                                   |
| TCONS_00037484 | -1.33402 | -2.61279  | -1.72852    | BGIOSGA019937 | XP_006664174.1 serine/threonine-protein kinase Nek2                                                                          |
| TCONS_00000002 | -1.33401 | 0.109662  | 0.418293    | BGIOSGA033248 | XP_006643621.2 monocopper oxidase-like protein SKU5                                                                          |
| TCONS_00030541 | -1.33358 | -1.45126  | -1.6966     | BGIOSGA028182 | XP_006660981.1 potassium transporter 18                                                                                      |
| TCONS_00028830 | -1.33316 | 0.664123  | -2.36806    | BGIOSGA020220 | XP_015696312.1 probable LRR receptor-like serine/threonine-protein kinase At1g51810                                          |
| TCONS_00007282 | -1.33126 | -1.08137  | -1.23129    | #N/A          | XP_006646828.1 dnaJ homolog subfamily B member 1-like                                                                        |
| TCONS_00008632 | -1.32997 | -7.42221  | -4.43824    | BGIOSGA026145 | XP_006647731.1 probable 4-coumarate-CoA ligase 2                                                                             |
| TCONS_00014591 | -1.3296  | -2.5975   | -3.68346    | BGIOSGA019723 | XP_006652510.1 beta-glucosidase 16-like                                                                                      |
| TCONS_00024117 | -1.32956 | -2.63111  | -1.32935    | BGIOSGA010588 | XP_015695297.1 protein WEAK CHLOROPLAST MOVEMENT UNDER BLUE LIGHT 1-like                                                     |
| TCONS_00009255 | -1.32924 | -0.622564 | -1.06592    | BGIOSGA035417 | XP_006649344.1 chitin elicitor-binding protein-like                                                                          |
| TCONS_00014757 | -1.32872 | -0.204878 | -0.325099   | BGIOSGA022137 | XP_022683888.1protein PHR1-LIKE 3 isoform X2                                                                                 |

transcriptome

|                |          |           |            |              |                                                                                   |
|----------------|----------|-----------|------------|--------------|-----------------------------------------------------------------------------------|
| TCONS_00026599 | -1.32849 | -1.47952  | -1.73885   | BGIOGA002943 | XP_015691515.1 AP2-like ethylene-responsive transcription factor BBM1             |
| TCONS_00026798 | -1.32795 | -0.687117 | -1.0527    | BGIOGA033119 | XP_022683187.1 protein DETOXIFICATION 27                                          |
| TCONS_00000171 | -1.3279  | -0.779754 | -1.60285   | BGIOGA034487 | XP_003565134.160S ribosomal protein L26-1                                         |
| TCONS_00033359 | -1.32654 | -0.561264 | -1.33051   | BGIOGA016128 | XP_006662878.1 probable protein phosphatase 2C 75                                 |
| TCONS_00035107 | -1.32638 | -0.836262 | 0.415054   | BGIOGA001532 | XP_015697707.1 ABC transporter G family member 48                                 |
| TCONS_00004902 | -1.32613 | -2.86663  | -1.85347   | BGIOGA033262 | XP_006646566.2 probable methyltransferase PMT17                                   |
| TCONS_00029636 | -1.32508 | 0.742711  | -0.289727  | BGIOGA030182 | NP_001146226.1 putative ARM repeat-containing protein containing family protein   |
| TCONS_00017760 | -1.324   | -2.63082  | -2.46473   | BGIOGA019824 | NP_001149610.1 dnaJ domain containing protein                                     |
| TCONS_00003890 | -1.32353 | -0.275528 | -1.09      | BGIOGA031508 | XP_002458061.1 protein QUIRKY                                                     |
| TCONS_00014975 | -1.32249 | -3.18574  | -1.2458    | BGIOGA017163 | XP_021318973.1 peroxisomal (S)-2-hydroxy-acid oxidase GLO2                        |
| TCONS_00014287 | -1.3212  | -1.58281  | -1.45196   | BGIOGA013697 | XP_006652300.1 serine/threonine-protein kinase SAPK7                              |
| TCONS_00006792 | -1.32104 | -2.79695  | -2.75878   | BGIOGA027700 | XP_015689567.1 putative U-box domain-containing protein 42                        |
| TCONS_00037404 | -1.32051 | -0.816168 | -0.660346  | BGIOGA005808 | XP_015698749.1 asparagine synthetase domain-containing protein 1-like             |
| TCONS_00018106 | -1.32033 | -0.401852 | -1.75949   | BGIOGA023082 | XP_004961554.1 protein LURP-one-related 5                                         |
| TCONS_00028124 | -1.31977 | -0.227915 | -1.52059   | BGIOGA029678 | XP_021310336.1F-box/FBD/LRR-repeat protein At1g13570                              |
| TCONS_00001658 | -1.31951 | -1.16209  | -2.68815   | BGIOGA013293 | XP_015689693.1 transcription factor bHLH13-like                                   |
| TCONS_00005308 | -1.31942 | -0.783966 | -0.522114  | BGIOGA007418 | XP_0066446812.1 peroxisome biogenesis protein 16                                  |
| TCONS_00017063 | -1.31876 | -3.24066  | -3.11645   | BGIOGA013535 | XP_002270750.3 probable WRKY transcription factor 65                              |
| TCONS_00000709 | -1.31872 | -2.7869   | -4.70731   | BGIOGA005016 | XP_006644085.1 kinectin-like isoform X1                                           |
| TCONS_00016006 | -1.31871 | -1.72919  | -0.660364  | BGIOGA002796 | XP_006653478.1 gamma-glutamyltranspeptidase 1-like                                |
| TCONS_00015481 | -1.31846 | 0.0219828 | -2.4169    | BGIOGA026351 | XP_006653215.1 G-type lectin S-receptor-like serine/threonine-protein kinase B120 |
| TCONS_00014935 | -1.31727 | -0.183741 | -1.00995   | BGIOGA017116 | XP_006652820.1 myosin heavy chain, non-muscle-like                                |
| TCONS_00004698 | -1.31683 | -0.9791   | -1.56096   | BGIOGA035878 | NP_001147780.1SLT1 protein                                                        |
| TCONS_00024907 | -1.31571 | -1.11852  | -0.619197  | BGIOGA021823 | XP_006655832.2 zinc finger CCHC domain-containing protein 40                      |
| TCONS_00035633 | -1.31508 | -0.63175  | -0.332284  | BGIOGA037054 | XP_015698227.1 nucleolar protein 6                                                |
| TCONS_00004390 | -1.31507 | 0.713495  | -0.0945423 | BGIOGA000831 | XP_010232318.2 uncharacterized protein LOC100822531                               |
| TCONS_00036524 | -1.31497 | -2.91112  | -4.09479   | BGIOGA002974 | XP_006663143.1 fatty acid desaturase DES3-like                                    |
| TCONS_00031805 | -1.31496 | -0.40864  | -0.287472  | BGIOGA024909 | XP_024315700.1 uncharacterized protein LOC100840606 isoform X1                    |
| TCONS_00002261 | -1.31355 | -3.49787  | -1.77638   | BGIOGA012201 | XP_004970732.1 protein NRT1/ PTR FAMILY 5.16                                      |
| TCONS_00015014 | -1.31344 | -1.91305  | -2.61316   | BGIOGA025052 | XP_004976919.1 organic cation/carnitine transporter 4                             |
| TCONS_00005747 | -1.31241 | -1.20652  | -0.445762  | BGIOGA011908 | XP_006647111.1 serine/threonine-protein kinase EDR1-like                          |
| TCONS_00038416 | -1.31147 | 0.791853  | 0.322806   | #N/A         | XP_012440607.1 PREDICTED: uncharacterized protein LOC105765883                    |
| TCONS_00001596 | -1.31026 | -0.42961  | -0.393014  | BGIOGA017610 | XP_006644560.1 PREDICTED: uncharacterized protein LOC102719812                    |
| TCONS_00004925 | -1.30974 | -0.616372 | -0.325497  | #N/A         | #N/A                                                                              |
| TCONS_00002659 | -1.30911 | -2.89443  | 0.185172   | BGIOGA018999 | XP_006643637.1 charged multivesicular body protein 5-like isoform X1              |
| TCONS_00035400 | -1.30892 | -2.20229  | -3.787     | BGIOGA026078 | XP_006663123.1 zinc finger protein ZAT8-like                                      |
| TCONS_00034027 | -1.30854 | -0.69746  | -1.59905   | BGIOGA031872 | XP_015698166.1 probable serine/threonine-protein kinase DDB_G0271682              |
| TCONS_00009308 | -1.30788 | -1.74828  | -1.27553   | BGIOGA011846 | XP_006649391.2 xyloglucan galactosyltransferase KATAMAR1 homolog                  |
| TCONS_00005338 | -1.30763 | -0.744391 | -4.79029   | BGIOGA007446 | XP_006646827.1 18.9 kDa heat shock protein-like                                   |
| TCONS_00025721 | -1.30744 | -2.35415  | 1.7168     | BGIOGA037114 | XP_006658147.1 thioredoxin-like 1-1, chloroplastic                                |
| TCONS_00027229 | -1.30697 | -0.990241 | -1.63461   | BGIOGA027773 | XP_006659046.1 phytolongin Phyl1.1-like                                           |
| TCONS_00014988 | -1.30643 | -0.220869 | -0.398726  | BGIOGA017179 | XP_006652856.1 PREDICTED: uncharacterized protein LOC102713071                    |
| TCONS_00034213 | -1.30502 | -1.04367  | -1.967     | BGIOGA008545 | XP_006663774.2 probable inactive serine/threonine-protein kinase bub1             |
| TCONS_00011314 | -1.30457 | 0.277683  | 0.0762708  | BGIOGA013920 | XP_006652013.1 protein FAR1-RELATED SEQUENCE 6-like                               |
| TCONS_00034158 | -1.30455 | -0.852339 | -0.846491  | BGIOGA024705 | XP_006663741.1 probable serine/threonine-protein kinase WNK8                      |
| TCONS_00021346 | -1.30413 | 0.0472213 | -1.24565   | BGIOGA014940 | XP_006656463.1 protein NRT1/ PTR FAMILY 8.3-like isoform X1                       |
| TCONS_00018739 | -1.3034  | -0.906065 | -0.538027  | BGIOGA002238 | XP_006655062.1 glutamine--tRNA ligase-like                                        |
| TCONS_00009448 | -1.30337 | -3.33731  | -1.61669   | BGIOGA006260 | XP_004985458.1 UDP-glucuronate:xylan alpha-glucuronosyltransferase 2 isoform X1   |
| TCONS_00002581 | -1.30293 | -3.01235  | -1.13112   | BGIOGA005224 | XP_012702038.1 uncharacterized protein LOC101770868                               |
| TCONS_00002106 | -1.30278 | -0.902416 | -1.28383   | BGIOGA017466 | XP_006644950.1 protein trichome birefringence-like 28 isoform X1                  |
| TCONS_00033053 | -1.30261 | -3.15436  | -1.50926   | BGIOGA019644 | XP_012703819.1 putative receptor-like protein kinase At3g47110                    |
| TCONS_00021462 | -1.30256 | -2.248    | -1.80486   | BGIOGA000752 | XP_003568127.1 probable xyloglucan glycosyltransferase 7                          |
| TCONS_00022812 | -1.3022  | -0.746315 | -1.3054    | BGIOGA020589 | XP_006656409.1 probable cadmium/zinc-transporting ATPase HMA1, chloroplastic      |

transcriptome

|                |          |            |            |               |                                                                                                     |
|----------------|----------|------------|------------|---------------|-----------------------------------------------------------------------------------------------------|
| TCONS_00035864 | -1.30079 | -0.64753   | -0.938062  | BGIOSGA028688 | XP_006664495.1 disease resistance protein RPP13-like                                                |
| TCONS_00025265 | -1.30044 | 1.03515    | 1.09852    | BGIOSGA029105 | XP_004978571.1 uncharacterized protein LOC101772377                                                 |
| TCONS_00016591 | -1.29955 | -0.783425  | -0.683769  | BGIOSGA014373 | XP_010240390.1 uncharacterized protein LOC100823437                                                 |
| TCONS_00022352 | -1.29917 | -2.40702   | 1.4364     | BGIOSGA024234 | XP_006656133.2 probable protein phosphatase 2C 56                                                   |
| TCONS_00019938 | -1.29845 | -2.17331   | -2.77775   | BGIOSGA011508 | XP_003567058.2 cytochrome P450 93G2<br>XP_015698692.1 alpha-L-arabinofuranosidase 1-like isoform X1 |
| TCONS_00035513 | -1.29723 | -2.89489   | #NA        | BGIOSGA034037 |                                                                                                     |
| TCONS_00002995 | -1.29712 | -2.63199   | 0.353312   | BGIOSGA020215 | XP_006643859.1 hexokinase-8<br>XP_006654826.1 3-ketoacyl-CoA synthase 11-like                       |
| TCONS_00019844 | -1.29637 | 0.174419   | 0.268999   | BGIOSGA010624 | XP_015695247.1 probable indole-3-acetic acid-amido synthetase GH3.11 isoform X1                     |
| TCONS_00025687 | -1.29588 | -3.41116   | -2.2347    | BGIOSGA004585 | XP_006655783.1 translation factor GUF1 homolog, mitochondrial                                       |
| TCONS_00020101 | -1.29352 | -1.55532   | -0.481631  | BGIOSGA013226 | XP_006653472.2 WEB family protein At4g27595, chloroplastic-like                                     |
| TCONS_00015988 | -1.29128 | -0.240976  | -1.45927   | BGIOSGA002133 | XP_015697589.1 leucine-rich repeat receptor protein kinase EMS1-like                                |
| TCONS_00033135 | -1.29025 | -0.969401  | -0.882744  | BGIOSGA034980 | XP_006652778.1 plant intracellular Ras-group-related LRR protein 1                                  |
| TCONS_00016567 | -1.29012 | -0.421945  | -1.00305   | BGIOSGA014400 | XP_006652866.1 anthocyanidin reductase-like                                                         |
| TCONS_00028194 | -1.28963 | -1.36332   | -2.54611   | BGIOSGA020859 | XP_015694413.1 cationic peroxidase SPC4-like                                                        |
| TCONS_00002588 | -1.28947 | -1.30898   | -0.436253  | BGIOSGA023665 | XP_006650878.1 PREDICTED: uncharacterized protein YacP                                              |
| TCONS_00011311 | -1.28836 | -3.83058   | -2.49122   | BGIOSGA013917 | XP_015691802.1 protein IRX15-LIKE-like                                                              |
| TCONS_00015070 | -1.28778 | -0.921462  | -0.399844  | BGIOSGA016844 | XP_006659092.1 60S acidic ribosomal protein P0                                                      |
| TCONS_00036628 | -1.28773 | 0.848043   | -0.477974  | BGIOSGA027706 | XP_006663977.1 ABC transporter G family member 11-like                                              |
| TCONS_00037060 | -1.28668 | -2.97939   | -2.48684   | BGIOSGA018917 | XP_003570450.1 protein STRUBBELIG-RECEPTOR FAMILY 3 isoform X1                                      |
| TCONS_00007441 | -1.28653 | -0.983727  | -0.433353  | BGIOSGA002134 | XP_024318988.1 disease resistance RPP8-like protein 3                                               |
| TCONS_00022866 | -1.28588 | -1.50554   | -1.6225    | BGIOSGA020578 | XP_006661535.1 thioredoxin H4-like                                                                  |
| TCONS_00029501 | -1.2857  | -3.4548    | -2.28725   | BGIOSGA031275 | XP_003576440.1 retinol dehydrogenase 13                                                             |
| TCONS_00029878 | -1.28523 | -2.67913   | -0.870328  | BGIOSGA025669 | XP_010925838.1 BURP domain-containing protein 6-like                                                |
| TCONS_00018839 | -1.28439 | -6.57548   | -2.08374   | BGIOSGA032475 | XP_006661948.1 probable serine protease EDA2                                                        |
| TCONS_00031448 | -1.2843  | -0.22223   | -0.486457  | BGIOSGA033266 | XP_006651010.1 expansin-like A1                                                                     |
| TCONS_00011512 | -1.28396 | -2.01666   | -0.169802  | BGIOSGA024325 | XP_01569785.1 beta-glucosidase 32-like isoform X1                                                   |
| TCONS_00030348 | -1.28378 | -0.605332  | -0.788548  | BGIOSGA026706 | XP_006643730.1 reticulon-like protein B9                                                            |
| TCONS_00000166 | -1.28367 | -4.80467   | -1.42624   | BGIOSGA002736 | XP_006662682.2 PREDICTED: uncharacterized protein LOC102702048                                      |
| TCONS_00034182 | -1.28113 | -1.50184   | -2.09867   | BGIOSGA036750 | XP_006657428.1 amino acid permease 6                                                                |
| TCONS_00024525 | -1.28092 | -0.900049  | -2.2508    | BGIOSGA017850 | XP_006648483.2 PREDICTED: uncharacterized protein LOC102714349, partial                             |
| TCONS_00005728 | -1.28066 | 0.0636746  | -0.226274  | BGIOSGA008980 | XP_006660248.1 uncharacterized WD repeat-containing protein C2A9.03                                 |
| TCONS_00026873 | -1.27759 | -1.58648   | -0.677248  | BGIOSGA005718 | XP_006653915.2 PREDICTED: uncharacterized protein LOC102717896                                      |
| TCONS_00015221 | -1.27706 | #NA        | -3.45389   | BGIOSGA017402 | XP_006650032.2 cytochrome P450 714B2                                                                |
| TCONS_00012202 | -1.27702 | #NA        | -4.11616   | BGIOSGA026400 | XP_006662238.1 AT-rich interactive domain-containing protein 4-like                                 |
| TCONS_00028103 | -1.27675 | -2.27697   | 0.793248   | BGIOSGA029700 | XP_006654377.1 fructose-bisphosphate aldolase cytoplasmic isozyme                                   |
| TCONS_00017779 | -1.27635 | -0.029101  | -0.324112  | BGIOSGA034421 | XP_015698595.1 probable apyrase 3                                                                   |
| TCONS_00032885 | -1.27576 | -2.27823   | #NA        | BGIOSGA034712 | XP_006650080.1 probable nucleolar protein 5-2                                                       |
| TCONS_00012273 | -1.27558 | -0.0539412 | 0.2337     | BGIOSGA010733 | XP_006659711.2 protein DETOXIFICATION 34-like                                                       |
| TCONS_00028479 | -1.27465 | -1.59674   | -3.22801   | BGIOSGA025929 | XP_006662048.1 expansin-B4                                                                          |
| TCONS_00031613 | -1.27423 | -3.86512   | -1.13904   | BGIOSGA011178 | XP_006654657.1 periodic tryptophan protein 2 homolog                                                |
| TCONS_00019642 | -1.274   | 0.311802   | 0.105214   | BGIOSGA017715 | XP_015691353.1 WEB family protein At2g17940-like                                                    |
| TCONS_00015289 | -1.27358 | -2.28098   | -1.14067   | BGIOSGA037594 | XP_006657617.1 ABC transporter G family member 11-like                                              |
| TCONS_00023496 | -1.27315 | -6.08393   | -3.22599   | BGIOSGA030205 | XP_015693690.1 cysteine-rich receptor-like protein kinase 10                                        |
| TCONS_00021287 | -1.27308 | -1.73946   | -1.85379   | BGIOSGA033580 | XP_006655419.2 PREDICTED: uncharacterized protein LOC102701452, partial                             |
| TCONS_00019500 | -1.27293 | -0.407324  | -2.14228   | BGIOSGA033176 | XP_015697694.1 PREDICTED: uncharacterized protein LOC102717943                                      |
| TCONS_00035043 | -1.27289 | -1.86681   | -0.879356  | BGIOSGA037826 | XP_015688702.1 E3 ubiquitin-protein ligase RNF14-like                                               |
| TCONS_00006683 | -1.27269 | -1.2821    | -3.46481   | BGIOSGA008853 | XP_006649600.2 probable protein phosphatase 2C 29                                                   |
| TCONS_00009533 | -1.27181 | 1.70674    | -0.244599  | BGIOSGA024937 | XP_015690859.1 PREDICTED: uncharacterized protein LOC102710481 isoform X2                           |
| TCONS_00012034 | -1.27171 | -1.1266    | -0.865748  | BGIOSGA010973 | XP_006662061.1 8-amino-7-oxononanoate synthase-like                                                 |
| TCONS_00031624 | -1.27083 | -1.23197   | -0.732447  | BGIOSGA030676 | XP_012698264.1 probable glucan 1,3-beta-glucosidase A                                               |
| TCONS_00032083 | -1.27046 | -1.64748   | -0.0553025 | BGIOSGA018449 | XP_015688495.1 MLO-like protein 1                                                                   |
| TCONS_00005621 | -1.27033 | -1.2687    | -1.00406   | BGIOSGA030764 | XP_006659092.1 60S acidic ribosomal protein P0                                                      |
| TCONS_00027296 | -1.27008 | -0.577888  | -0.785004  | BGIOSGA036674 | XP_015688875.1 fatty-acid-binding protein 2-like isoform X1                                         |
| TCONS_00006958 | -1.26963 | -2.54899   | -0.887424  | BGIOSGA009142 | XP_015688763.1 pentatricopeptide repeat-containing protein At1g31430                                |
| TCONS_00007115 | -1.26928 | -0.648955  | 0.0292623  | BGIOSGA009299 |                                                                                                     |

transcriptome

|                 |          |            |             |               |                                                                                                     |
|-----------------|----------|------------|-------------|---------------|-----------------------------------------------------------------------------------------------------|
| TCONS_00023268  | -1.26916 | 0.553452   | -1.18011    | BGIOSGA009208 | XP_006658357.1 plasma membrane ATPase 1-like                                                        |
| TCONS_00021341  | -1.26844 | -0.446385  | -0.72145    | BGIOSGA023568 | XP_006657319.1 putative tRNA (cytidine(32)guanosine(34)-2'-O)-methyltransferase                     |
| TCONS_00000291  | -1.268   | -1.39848   | -1.30906    | BGIOSGA019257 | NP_001142251.1lipase/lipoxygenase, PLAT/LH2                                                         |
| TCONS_00002506  | -1.268   | -0.989198  | -1.1452     | #N/A          | #N/A                                                                                                |
| TCONS_00030162  | -1.26631 | -0.647962  | -3.38255    | BGIOSGA025034 | XP_006660692.1 tuliposide A-converting enzyme b1, amyloplastic-like                                 |
| TCONS_00026835  | -1.26561 | -0.511349  | -0.794056   | BGIOSGA001540 | XP_015696192.1 transcription factor BIM1-like                                                       |
| TCONS_00015060  | -1.26541 | -0.702698  | -0.382861   | #N/A          | #N/A                                                                                                |
| TCONS_00024573  | -1.26535 | -0.365112  | -2.91265    | #N/A          | #N/A                                                                                                |
| TCONS_00004347  | -1.26531 | -1.41579   | -1.18491    | BGIOSGA000867 | XP_006659755.1 NADPH-dependent diflavin oxidoreductase 1                                            |
| TCONS_00025848  | -1.26519 | 1.42882    | -0.63991    | BGIOSGA014548 | XP_004972971.1lysine histidine transporter 2                                                        |
| TCONS_00009796  | -1.26364 | -0.867451  | -0.18077    | BGIOSGA009555 | XP_015691148.1PREDICTED: uncharacterized protein LOC102720963, partial                              |
| TCONS_00016092  | -1.26273 | -1.43817   | -0.564831   | BGIOSGA006136 | XP_006652410.2 copper methylamine oxidase                                                           |
| TCONS_00028429  | -1.26242 | -2.55766   | -2.5508     | BGIOSGA010524 | XP_006660360.1 cytochrome P450 78A9-like                                                            |
| TCONS_00000078  | -1.26226 | -0.774686  | -1.6785     | BGIOSGA002652 | XP_006643675.1 probable receptor-like protein kinase At1g67000                                      |
| TCONS_00010925  | -1.26203 | -0.654657  | -1.20857    | BGIOSGA013493 | XP_014752663.1transcription factor BHLH148                                                          |
| TCONS_00018251  | -1.26124 | -0.738721  | -0.786269   | BGIOSGA004259 | XP_015692685.1 ABC transporter B family member 5-like                                               |
| TCONS_00027135  | -1.26104 | -0.929631  | 0.836921    | BGIOSGA030826 | XP_006650246.1 auxin-repressed 12.5 kDa protein                                                     |
| TCONS_00017617  | -1.26095 | -3.21932   | 0.718201    | BGIOSGA001545 | XP_002465233.1universal stress protein PHOS34                                                       |
| TCONS_00005619  | -1.26058 | 0.0597679  | 0.685205    | BGIOSGA020720 | XP_006647022.1 probable copper-transporting ATPase HMA5                                             |
| TCONS_00022696  | -1.26041 | -1.7107    | -1.3716     | BGIOSGA020745 | XP_006656328.1 TBC1 domain family member 5 homolog B-like                                           |
| TCONS_00018722  | -1.26005 | -1.23494   | -0.774712   | BGIOSGA034766 | XP_006654102.1 auxin-responsive protein IAA15                                                       |
| TCONS_00004265  | -1.25979 | -4.31569   | -2.59264    | BGIOSGA005375 | XP_021311299.1transcription factor bHLH84                                                           |
| TCONS_00001522  | -1.25927 | -4.31634   | -0.915853   | BGIOSGA004953 | XP_015689492.1 mannan endo-1,4-beta-mannosidase 1                                                   |
| TCONS_000039755 | -1.25919 | 1.82813    | 0.161069    | #N/A          | XP_013443002.1senescence-associated protein                                                         |
| TCONS_00010878  | -1.25786 | -0.617679  | -0.671419   | BGIOSGA013065 | XP_006650533.1 pentatricopeptide repeat-containing protein At3g49730                                |
| TCONS_00021735  | -1.25781 | 0.13967    | -0.55027    | BGIOSGA009206 | XP_017625336.1 60S ribosomal protein L39                                                            |
| TCONS_00024549  | -1.25687 | -0.795792  | -0.336811   | BGIOSGA030536 | XP_010228421.1rust resistance kinase Lr10                                                           |
| TCONS_00027801  | -1.25636 | -0.640075  | -1.36404    | BGIOSGA027960 | XP_006661582.1 basic blue protein-like                                                              |
| TCONS_00010009  | -1.25594 | -2.56556   | -2.04034    | BGIOSGA012425 | XP_015691298.1 probable inactive receptor kinase At5g58300                                          |
| TCONS_00030642  | -1.25538 | -1.16771   | -0.926246   | BGIOSGA032349 | XP_015696920.1 putative disease resistance protein RGA3                                             |
| TCONS_00035566  | -1.25471 | -3.37734   | -1.93894    | BGIOSGA036469 | NP_001278782.1jasmonate-induced protein-like                                                        |
| TCONS_00031237  | -1.25431 | -0.524824  | -1.89292    | BGIOSGA011454 | XP_015697499.1 putative transporter arsB                                                            |
| TCONS_00002461  | -1.25427 | -1.06119   | -0.750612   | BGIOSGA005104 | XP_004970117.1protein SPA, chloroplastic                                                            |
| TCONS_00023215  | -1.25388 | -2.92359   | -0.829061   | BGIOSGA034552 | XP_003577876.1protein ZINC INDUCED FACILITATOR-LIKE 1 isoform X2                                    |
| TCONS_00003869  | -1.2526  | 0.0977829  | -4.25635    | BGIOSGA001346 | XP_015691251.1 myosin-2 heavy chain-like                                                            |
| TCONS_00013339  | -1.25253 | -1.99114   | -2.1469     | BGIOSGA024718 | XP_008681053.1plant Tudor-like RNA-binding protein isoform X1                                       |
| TCONS_00007776  | -1.25201 | -0.409918  | -0.00987964 | BGIOSGA000780 | XP_015689066.1 protein tesmin/TSO1-like CXC 5 isoform X1                                            |
| TCONS_00025381  | -1.25133 | 3.05554    | 0.264061    | BGIOSGA021329 | XP_006657865.2 protein TIME FOR COFFEE                                                              |
| TCONS_00035010  | -1.2502  | -2.94882   | -1.45069    | BGIOSGA033847 | NP_001159208.1virulent strain associated lipoprotein                                                |
| TCONS_00006596  | -1.24923 | -1.10966   | -2.06133    | BGIOSGA000547 | XP_015688686.1 scarecrow-like protein 6                                                             |
| TCONS_00015369  | -1.24852 | -0.704771  | -1.57361    | BGIOSGA022542 | XP_012702710.1uncharacterized protein LOC101768343                                                  |
| TCONS_00022566  | -1.24836 | -1.34749   | 0.710163    | BGIOSGA011643 | XP_015694255.1 ribose-phosphate pyrophosphokinase 2, chloroplastic                                  |
| TCONS_00036529  | -1.24831 | -0.767558  | -1.50713    | BGIOSGA036798 | XP_006662647.2 probable phytol kinase 2, chloroplastic                                              |
| TCONS_00011356  | -1.24768 | 0.102344   | -1.51098    | BGIOSGA013969 | XP_004981004.1putative gamma-glutamylcyclotransferase At3g02910                                     |
| TCONS_00027514  | -1.24626 | -3.25558   | -2.43823    | BGIOSGA006596 | XP_002445184.1putative F-box/LRR-repeat protein 23                                                  |
| TCONS_00012712  | -1.24575 | -0.0728712 | -1.80363    | BGIOSGA011300 | XP_003562286.1zinc finger protein 1                                                                 |
| TCONS_00034331  | -1.24548 | -2.38716   | -1.96202    | BGIOSGA036312 | XP_010025545.1 histone H3.2                                                                         |
| TCONS_00005255  | -1.24462 | -2.3881    | #N/A        | BGIOSGA007368 | XP_012837152.1 peptidyl-prolyl cis-trans isomerase 1                                                |
| TCONS_00036637  | -1.24461 | -3.57958   | -3.76426    | BGIOSGA012782 | XP_006662724.1 agmatine coumaroyltransferase-2-like                                                 |
| TCONS_00027456  | -1.24447 | -1.33626   | -1.77038    | BGIOSGA019942 | XP_006659885.2 transcription factor TGA6-like                                                       |
| TCONS_00002704  | -1.24414 | -2.72402   | -1.75607    | BGIOSGA002733 | XP_006645443.1 glycerophosphodiester phosphodiesterase protein kinase domain-containing GDPDL2-like |
| TCONS_00004745  | -1.2441  | -1.84326   | -1.18056    | BGIOSGA032900 | XP_006645036.1 glycerol-3-phosphate 2-O-acyltransferase 6-like                                      |
| TCONS_00006713  | -1.24396 | -0.6128    | -1.41434    | BGIOSGA008882 | XP_006647754.1PREDICTED: uncharacterized protein LOC102708688                                       |
| TCONS_00001544  | -1.24336 | -0.121721  | 0.341181    | BGIOSGA038169 | XP_006644497.1 putative receptor protein kinase ZmPK1                                               |
| TCONS_00008252  | -1.24307 | -2.69255   | -3.08       | BGIOSGA035404 | XP_002452347.1protein NRT1/ PTR FAMILY 6.4                                                          |
| TCONS_00009475  | -1.24259 | -1.42458   | -1.78525    | BGIOSGA024273 | XP_006649538.1 ras-related protein RABH1e-like                                                      |
| TCONS_00020994  | -1.24241 | -0.774987  | -1.59975    | BGIOSGA028488 | XP_006656219.1 phospholipase D alpha 2-like                                                         |
| TCONS_00002455  | -1.24184 | 0.533604   | -0.401277   | BGIOSGA008657 | XP_003564986.1auxin response factor 4                                                               |

## transcriptome

|                |          |              |             |               |                                                                                          |
|----------------|----------|--------------|-------------|---------------|------------------------------------------------------------------------------------------|
| TCONS_00024265 | -1.24149 | -3.60347     | -1.39927    | BGIOSGA019808 | XP_006658911.1 methyltransferase-like protein 13                                         |
| TCONS_00009716 | -1.24124 | #NA          | -2.97279    | BGIOSGA033832 | XP_006649781.2 probable phospholipase A2 homolog 2 isoform X2                            |
| TCONS_00017894 | -1.24032 | -1.07973     | -0.969161   | BGIOSGA027558 | XP_015693200.1 transcription factor HBP-1b(c38)-like isoform X6                          |
| TCONS_00022934 | -1.23823 | -1.39529     | 1.34151     | BGIOSGA020511 | XP_015694234.1 thiosulfate sulfurtransferase 16, chloroplastic-like                      |
| TCONS_00031727 | -1.23749 | -2.90141     | -2.47128    | BGIOSGA036981 | XP_006661601.1 protein NRT1/ PTR FAMILY 8.3-like                                         |
| TCONS_00006900 | -1.23629 | -2.27067     | -0.840077   | #N/A          | XP_006647921.1 PREDICTED: uncharacterized protein LOC102710376                           |
| TCONS_00030199 | -1.23618 | -0.53575     | -0.759453   | BGIOSGA014453 | XP_006661334.1 E3 ubiquitin-protein ligase RING1-like                                    |
| TCONS_00024357 | -1.23602 | -0.889593    | -0.570589   | BGIOSGA010794 | XP_006658136.1 serine/threonine-protein kinase AtPK2/AtPK19-like                         |
| TCONS_00011464 | -1.23579 | 0.186743     | 0.286426    | BGIOSGA011424 | XP_002465969.1 heavy metal-associated isoprenylated plant protein 30                     |
| TCONS_00003322 | -1.23514 | -0.8001      | -1.13644    | BGIOSGA036673 | XP_008657261.1 protein ZINC INDUCED FACILITATOR-LIKE 1                                   |
| TCONS_00035920 | -1.23507 | -1.81415     | 0.333506    | BGIOSGA005528 | XP_006664005.1 probable tyrosine-protein phosphatase At1g05000                           |
| TCONS_00006780 | -1.23507 | -1.39911     | -1.40346    | BGIOSGA021835 | XP_015693150.1 auxin-responsive protein IAA8-like isoform X2                             |
| TCONS_00016833 | -1.23497 | -0.229305    | 0.40365     | BGIOSGA014132 | XP_003579457.1 probable carboxylesterase Os04g0669600                                    |
| TCONS_00004067 | -1.23369 | -1.3467      | -0.255739   | BGIOSGA032833 | XP_006644432.1 molybdate transporter 2                                                   |
| TCONS_00009036 | -1.23351 | 0.163742     | 0.177588    | BGIOSGA005371 | XP_006649166.2 diphthamide biosynthesis protein 1                                        |
| TCONS_00011059 | -1.23289 | -1.21587     | -0.385633   | BGIOSGA013658 | XP_006651872.1 PREDICTED: uncharacterized protein LOC102708513                           |
| TCONS_00016377 | -1.23254 | 1.24159      | 0.0558471   | BGIOSGA014589 | XP_004976442.1 probable plastid-lipid-associated protein 11                              |
| TCONS_00012820 | -1.23242 | -1.81746     | -1.99509    | BGIOSGA010146 | XP_006651633.1 protein ROOT PRIMORDIUM DEFECTIVE 1-like                                  |
| TCONS_00020312 | -1.23206 | -2.08095     | -3.99599    | BGIOSGA027060 | XP_006655895.1 anthocyanin regulatory C1 protein-like                                    |
| TCONS_00011058 | -1.23151 | 2.82525      | 0.909537    | BGIOSGA001014 | XP_006656565.1 pentatricopeptide repeat-containing protein At1g08070, chloroplastic-like |
| TCONS_00025660 | -1.23143 | 2.71904      | 0.563226    | #N/A          | #N/A                                                                                     |
| TCONS_00017009 | -1.23112 | -0.404062    | -0.413374   | BGIOSGA015659 | XP_004960492.1 uncharacterized protein LOC101760917 isoform X1                           |
| TCONS_00034269 | -1.23091 | -0.596852    | -0.593884   | BGIOSGA001660 | XP_006660824.1 acyltransferase-like protein At1g54570, chloroplastic                     |
| TCONS_00037560 | -1.23063 | -4.40468     | -2.99956    | BGIOSGA033877 | XP_006664764.1 23.2 kDa heat shock protein-like                                          |
| TCONS_00024454 | -1.22977 | -0.820808    | #NA         | BGIOSGA002245 | XP_006658215.1 probable WRKY transcription factor 57                                     |
| TCONS_00007252 | -1.22964 | -0.236012    | 0.904854    | BGIOSGA023625 | XP_006648244.1 serine/threonine-protein kinase STY46-like                                |
| TCONS_00016172 | -1.22957 | -0.442544    | -0.569238   | BGIOSGA029852 | XP_004976089.1(+)-neomenthol dehydrogenase                                               |
| TCONS_00004252 | -1.22933 | -3.82137     | -2.68088    | BGIOSGA011837 | XP_006644576.1 myb-related protein Hv33-like                                             |
| TCONS_00027077 | -1.22876 | 0.789347     | -0.682304   | BGIOSGA024205 | XP_015695711.1 thaumatin-like protein 1                                                  |
| TCONS_00027070 | -1.22866 | -1.59982     | -1.00448    | BGIOSGA029066 | XP_006659657.1 probable 6-phosphogluconolactonase 3, chloroplastic                       |
| TCONS_00005344 | -1.22863 | -1.23728     | -0.00453631 | BGIOSGA018630 | XP_023157549.1 uncharacterized protein LOC103646630                                      |
| TCONS_00036570 | -1.22838 | -0.533055    | -0.889689   | BGIOSGA034604 | XP_006663163.2 PREDICTED: uncharacterized protein LOC102714866                           |
| TCONS_00036286 | -1.22803 | -1.82301     | -2.42108    | BGIOSGA038054 | XP_015698505.1 factor of DNA methylation 5-like isoform X5                               |
| TCONS_00032183 | -1.22773 | -0.246142    | -0.342013   | BGIOSGA031953 | XP_006661763.1 PREDICTED: uncharacterized protein LOC102712663                           |
| TCONS_00015068 | -1.2276  | -1.39395     | -1.63691    | BGIOSGA028838 | XP_015691597.1 floral homeotic protein APETALA 2-like                                    |
| TCONS_00021963 | -1.22745 | -1.99366     | -1.78509    | BGIOSGA015677 | XP_006655959.1 anthranilate O-methyltransferase 3-like                                   |
| TCONS_00017622 | -1.22724 | -1.40897     | -1.22374    | BGIOSGA019684 | XP_010231509.1 exonuclease mut-7 homolog isoform X2                                      |
| TCONS_00007124 | -1.22701 | -0.71536     | -1.03486    | BGIOSGA015886 | XP_015688768.1 ethylene receptor 3                                                       |
| TCONS_00010064 | -1.22694 | -1.39795     | -0.596052   | BGIOSGA012608 | XP_015689890.1 lysine-specific demethylase JMJ25                                         |
| TCONS_00030155 | -1.22651 | -0.222252    | -1.09226    | BGIOSGA009762 | XP_015696756.1 nuclear pore complex protein NUP58                                        |
| TCONS_00016521 | -1.22615 | -1.97737     | -0.873195   | BGIOSGA008356 | XP_015692065.1 PREDICTED: uncharacterized protein LOC102700137                           |
| TCONS_00018583 | -1.22613 | 0.718927     | -1.20339    | BGIOSGA007670 | XP_006654970.1 WRKY transcription factor 6-like                                          |
| TCONS_00030124 | -1.22597 | -1.96999     | -2.49657    | BGIOSGA026880 | NP_001147572.1 flavonoid 3-monooxygenase                                                 |
| TCONS_00011716 | -1.22564 | -1.37261     | -1.13234    | BGIOSGA011294 | XP_003558608.3 non-specific lipid-transfer protein-like protein At5g64080                |
| TCONS_00003787 | -1.22547 | -0.734385    | -1.83828    | BGIOSGA035293 | XP_004968917.1 methyltransferase 7                                                       |
| TCONS_00027305 | -1.22499 | -1.02013     | -0.383269   | BGIOSGA014281 | XP_019709040.1 mediator of RNA polymerase II transcription subunit 21-like               |
| TCONS_00001941 | -1.22499 | -2.16706     | -1.35416    | BGIOSGA023866 | XP_022682731.1 G-type lectin S-receptor-like serine/threonine-protein kinase B120        |
| TCONS_00025395 | -1.22497 | 0.00322656   | -1.53967    | BGIOSGA024500 | XP_015694893.1 L-type lectin-domain containing receptor kinase IV.1-like                 |
| TCONS_00015002 | -1.22469 | -0.000354087 | -0.464105   | BGIOSGA021995 | XP_006653797.2 protein SDA1 homolog                                                      |
| TCONS_00012944 | -1.22448 | -2.0201      | -0.522944   | BGIOSGA006044 | XP_015690017.1 protein argonaute 12-like                                                 |
| TCONS_00032618 | -1.22368 | -0.67748     | -2.08596    | BGIOSGA032289 | XP_012698474.1 homeobox protein BEL1 homolog                                             |
| TCONS_00012568 | -1.22246 | -2.2323      | -0.265492   | BGIOSGA008183 | XP_006648628.1 PREDICTED: uncharacterized protein LOC102707377                           |

## transcriptome

|                |          |            |            |               |                                                                                                     |
|----------------|----------|------------|------------|---------------|-----------------------------------------------------------------------------------------------------|
| TCONS_00004928 | -1.22175 | -1.34571   | -0.903426  | BGIOSGA000293 | XP_004970978.1TBC1 domain family member 13                                                          |
| TCONS_00036155 | -1.22138 | -1.12379   | -0.704409  | BGIOSGA037514 | XP_003575781.1uncharacterized protein                                                               |
| TCONS_00018784 | -1.22056 | -1.81197   | -1.82315   | BGIOSGA029609 | LOC100843284                                                                                        |
| TCONS_00016148 | -1.22045 | -0.610337  | -0.513326  | BGIOSGA004987 | XP_006654140.1 NDR1/HIN1-Like protein 3-like                                                        |
| TCONS_00027295 | -1.21946 | -0.949767  | -1.3244    | BGIOSGA027707 | XP_015692101.1 CMP-sialic acid transporter 4                                                        |
| TCONS_00032588 | -1.21894 | 0.122727   | -0.482114  | BGIOSGA025777 | XP_006659796.1 2-succinylbenzoate--CoA ligase, chloroplastic/peroxisomal                            |
| TCONS_00012100 | -1.21843 | -0.905106  | -1.42067   | BGIOSGA019641 | XP_004984898.1uncharacterized protein                                                               |
| TCONS_00002702 | -1.21775 | -1.86759   | -2.16855   | BGIOSGA002514 | LOC101756085                                                                                        |
| TCONS_00013781 | -1.21686 | -2.46289   | -1.90258   | BGIOSGA029433 | XP_006643674.1 glycerophosphodiester phosphodiesterase protein kinase domain-containing GDPDL2-like |
| TCONS_00035406 | -1.21613 | 0.384116   | 0.118233   | BGIOSGA016943 | XP_015695813.1 disease resistance protein RPM1-like                                                 |
| TCONS_00023794 | -1.21608 | -1.06159   | -0.330395  | BGIOSGA038018 | XP_006663131.1 RHOMBOLD-like protein 2                                                              |
| TCONS_00018501 | -1.21593 | -1.503     | -1.07679   | BGIOSGA023259 | XP_006657773.2 septum-promoting GTP-binding protein 1                                               |
| TCONS_00001631 | -1.21585 | -2.28415   | -1.14029   | BGIOSGA004264 | XP_006654923.1 beta-hexosaminidase 1                                                                |
| TCONS_00026340 | -1.21396 | -0.802474  | -0.769242  | BGIOSGA007832 | XP_006644567.1 transcription initiation factor TFIIID subunit 1 isoform X2                          |
| TCONS_00031003 | -1.21389 | -0.417204  | -1.64415   | BGIOSGA032811 | XP_015695941.1 putative chloride channel-like protein CLC-g                                         |
| TCONS_00016160 | -1.21388 | -0.0256536 | -0.377135  | BGIOSGA014819 | XP_021304334.1uncharacterized protein                                                               |
| TCONS_00007178 | -1.21354 | -0.0769993 | -1.35224   | BGIOSGA007319 | LOC8155683                                                                                          |
| TCONS_00022406 | -1.21348 | -9.5481    | -4.61026   | BGIOSGA007839 | XP_006650351.1 7-methylguanosine phosphate-specific 5'-nucleotidase A                               |
| TCONS_00001918 | -1.21337 | -1.75581   | -0.0955063 | BGIOSGA004554 | XP_006648191.1 protein disulfide isomerase-like 1-4                                                 |
| TCONS_00003574 | -1.21334 | -1.85847   | -0.555433  | BGIOSGA021669 | XP_006656153.1 protein HEADING DATE 3A-like isoform X1                                              |
| TCONS_00029682 | -1.21311 | 0.30137    | -0.144442  | BGIOSGA026593 | XP_006646387.1 aspartic proteinase-like protein 2                                                   |
| TCONS_00024118 | -1.21191 | -0.793442  | -1.10918   | BGIOSGA026153 | XP_015688299.1 putative 12-oxophytodienoate reductase 10                                            |
| TCONS_00032121 | -1.21169 | -0.867729  | -1.04249   | BGIOSGA026567 | XP_006660471.1 60S ribosomal protein L17                                                            |
| TCONS_00025240 | -1.21107 | -0.622473  | -0.225429  | BGIOSGA035543 | XP_015694949.1 polcalcine Phl p 7-like                                                              |
| TCONS_00010895 | -1.21103 | -0.997302  | -2.02281   | BGIOSGA025928 | XP_006661729.1 probable calcium-binding protein CML8 isoform X2                                     |
| TCONS_00014307 | -1.21082 | -0.660192  | -1.32759   | BGIOSGA000812 | XP_006663641.1 disease resistance protein RPM1-like                                                 |
| TCONS_00010029 | -1.2108  | -1.58008   | -2.03968   | BGIOSGA023572 | XP_015690056.1 BEL1-like homeodomain protein 4                                                      |
| TCONS_00032262 | -1.21021 | -1.02332   | -0.312997  | BGIOSGA037671 | XP_015692249.1 auxin response factor 9                                                              |
| TCONS_00009147 | -1.21001 | -2.79434   | -0.38661   | BGIOSGA030324 | XP_015691231.1 putative potassium transporter 8                                                     |
| TCONS_00036441 | -1.20987 | -2.07994   | -1.86985   | BGIOSGA004251 | XP_014617947.1TATA-box-binding protein isoform X4                                                   |
| TCONS_00029172 | -1.20956 | -0.369401  | -1.51489   | BGIOSGA024334 | XP_006649239.1 UPF0548 protein At2g17695 isoform X2                                                 |
| TCONS_00014294 | -1.20942 | 0.285967   | -0.869282  | BGIOSGA003960 | XP_022681241.1probable LRR receptor-like serine/threonine-protein kinase At3g47570                  |
| TCONS_00028069 | -1.20942 | -2.46126   | -3.2843    | BGIOSGA029762 | XP_006661320.1 probable carboxylesterase 2                                                          |
| TCONS_00018781 | -1.20903 | -0.411125  | -1.4108    | BGIOSGA034776 | XP_015692345.1 amino-acid permease BAT1 homolog isoform X2                                          |
| TCONS_00023393 | -1.20884 | 0.398245   | 0.0985456  | BGIOSGA016863 | XP_006659441.1 ATP-dependent 6-phosphofructokinase 5, chloroplastic-like                            |
| TCONS_00022119 | -1.20869 | -0.0955709 | -0.804963  | BGIOSGA021386 | XP_015692900.1 IQ domain-containing protein IQM5-like                                               |
| TCONS_00014009 | -1.20844 | 0.142588   | -0.251725  | BGIOSGA016317 | XP_024313537.15'-3' exoribonuclease 4-like                                                          |
| TCONS_00035859 | -1.20799 | -1.46306   | -0.965914  | BGIOSGA036821 | XP_006656026.1 39S ribosomal protein L46, mitochondrial                                             |
| TCONS_00023640 | -1.20725 | -1.65428   | -3.26069   | BGIOSGA033341 | XP_015691740.1 40S ribosomal protein S27-like                                                       |
| TCONS_00015506 | -1.20705 | -1.6479    | -1.51413   | BGIOSGA015478 | XP_004978420.1probable LRR receptor-like serine/threonine-protein kinase At1g67720                  |
| TCONS_00014913 | -1.20697 | 1.35068    | -1.99509   | BGIOSGA037498 | XP_015695308.1 probable glutathione S-transferase GSTU1                                             |
| TCONS_00010705 | -1.20619 | -1.99182   | -1.07424   | BGIOSGA013334 | XP_015691984.1 probable cleavage and polyadenylation specificity factor subunit 1 isoform X3        |
| TCONS_00006859 | -1.20515 | -0.804933  | -2.17909   | BGIOSGA009039 | XP_004976775.2vacuolar-sorting receptor 7                                                           |
| TCONS_00027482 | -1.20504 | -0.713154  | -0.698571  | BGIOSGA035456 | XP_015690574.1 ankyrin repeat and protein kinase domain-containing protein 1-like isoform X1        |
| TCONS_00034219 | -1.20459 | -1.79095   | -0.759569  | BGIOSGA031869 | XP_006647878.1 photosynthetic NDH subunit of subcomplex B 4, chloroplastic                          |
| TCONS_00009085 | -1.20166 | 0.524993   | #NA        | BGIOSGA039322 | XP_004972692.1CRS2-associated factor 2, mitochondrial                                               |
| TCONS_00026460 | -1.20155 | 0.110541   | -1.61355   | BGIOSGA030488 | XP_015698533.1PREDICTED: uncharacterized protein LOC102714873                                       |
| TCONS_00032440 | -1.20072 | -2.42761   | -1.2585    | BGIOSGA016743 | XP_008811187.1PREDICTED: uncharacterized protein LOC103722404 isoform X2                            |
| TCONS_00000331 | -1.20045 | -1.28987   | -0.224602  | BGIOSGA023883 | XP_006659322.1 protein SAR DEFICIENT 1-like                                                         |
| TCONS_00008965 | -1.19916 | 0.147355   | -0.23763   | BGIOSGA005439 | XP_004982832.1E3 ubiquitin-protein ligase MARCH11 isoform X2                                        |
| TCONS_00016846 | -1.19832 | -2.4945    | -1.32599   | BGIOSGA007604 | XP_004968493.1uncharacterized protein                                                               |
| TCONS_00032616 | -1.19772 | -0.439696  | -0.649235  | BGIOSGA030546 | LOC101754097                                                                                        |
|                |          |            |            |               | XP_015688839.1 DEAD-box ATP-dependent RNA helicase 1                                                |
|                |          |            |            |               | XP_015691612.1 auxin response factor 12                                                             |
|                |          |            |            |               | XP_015697436.1 probable receptor-like protein kinase At5g24010                                      |



transcriptome

|                |          |           |           |               |                                                                                     |
|----------------|----------|-----------|-----------|---------------|-------------------------------------------------------------------------------------|
| TCONS_00032599 | -1.1974  | -3.07154  | -1.91848  | BGIOSGA005165 | XP_006661977.1 glutathione S-transferase U17-like                                   |
| TCONS_00035325 | -1.19737 | -0.469007 | -0.685006 | BGIOSGA004118 | XP_006655331.1 pentatricopeptide repeat-containing protein At4g14050, mitochondrial |
| TCONS_00014340 | -1.19722 | 1.10826   | -1.37026  | BGIOSGA016502 | XP_021318037.1zeaxanthin epoxidase, chloroplastic isoform X2                        |
| TCONS_00037549 | -1.19696 | -0.257119 | -1.10333  | BGIOSGA015452 | XP_015698821.1PREDICTED: uncharacterized protein LOC102704661                       |
| TCONS_00005042 | -1.19676 | -0.853835 | -0.233907 | BGIOSGA001423 | XP_015699238.1 esterase PIR7B-like                                                  |
| TCONS_00019740 | -1.19655 | #NA       | -0.693878 | BGIOSGA004244 | XP_006654744.1 reticulon-like protein B9                                            |
| TCONS_00033237 | -1.19601 | -0.499367 | -1.13659  | BGIOSGA035071 | XP_015698017.1 ankyrin repeat protein SKIP35-like                                   |
| TCONS_00036580 | -1.19595 | -2.10278  | -1.69538  | BGIOSGA036742 | XP_006663761.1 protein LURP-one-related 5-like                                      |
| TCONS_00025499 | -1.19589 | -2.5179   | -2.11057  | BGIOSGA000502 | XP_004971717.1aspartic proteinase CDR1                                              |
| TCONS_00031558 | -1.19559 | -0.848417 | -1.0272   | BGIOSGA025905 | XP_004983798.1protein PLASTID MOVEMENT IMPAIRED 1                                   |
| TCONS_00031701 | -1.19554 | 0.751034  | -0.218392 | BGIOSGA025073 | XP_003573755.1protein PHLOEM PROTEIN 2-LIKE A10                                     |
| TCONS_00005995 | -1.19502 | -1.16161  | -0.8172   | BGIOSGA020647 | XP_006647242.2PREDICTED: uncharacterized protein At4g22758                          |
| TCONS_00030271 | -1.19495 | -1.98429  | -0.845447 | BGIOSGA026136 | XP_015696852.1 AT-hook motif nuclear-localized protein 10-like                      |
| TCONS_00005108 | -1.19489 | -2.10413  | 0.208843  | BGIOSGA005178 | XP_015695873.1 transcription factor bHLH100-like                                    |
| TCONS_00013503 | -1.19434 | -1.33438  | -1.10758  | BGIOSGA036525 | XP_006652004.1 serine/threonine-protein kinase pakF-like                            |
| TCONS_00011816 | -1.19429 | -0.350248 | -1.20585  | BGIOSGA030715 | XP_015689822.1 alpha, alpha-trehalose-phosphate synthase [UDP-forming] 6-like       |
| TCONS_00012795 | -1.19407 | -0.408095 | -1.70442  | BGIOSGA032532 | XP_004982339.1homeobox-leucine zipper protein HOX32                                 |
| TCONS_00028088 | -1.19389 | -5.34777  | -2.34592  | BGIOSGA017855 | XP_006659458.1 receptor-like protein kinase                                         |
| TCONS_00025976 | -1.19349 | -1.78398  | 0.620385  | BGIOSGA025176 | XP_008811288.1 putative deoxyribonuclease TATDN1 isoform X2                         |
| TCONS_00029639 | -1.19327 | -3.17832  | -3.44288  | BGIOSGA031408 | XP_010942234.1 zinc finger protein CONSTANS-LIKE 2-like                             |
| TCONS_00027228 | -1.19325 | -1.28612  | -2.16954  | BGIOSGA027774 | XP_006659045.1 putative methyltransferase 14, chloroplastic                         |
| TCONS_00013579 | -1.19266 | 2.35248   | 1.15437   | BGIOSGA009396 | XP_006652050.1 pollen-specific leucine-rich repeat extensin-like protein 3          |
| TCONS_00000687 | -1.19242 | -0.648021 | 0.0490259 | BGIOSGA003277 | XP_015688261.1 procyclic form-specific polypeptide B-alpha-like                     |
| TCONS_00011748 | -1.19233 | -0.137735 | -0.534494 | BGIOSGA010240 | XP_006649590.1 cyclin-D5-3 isoform X1                                               |
| TCONS_00019354 | -1.19191 | -2.39507  | -1.86298  | BGIOSGA031270 | XP_003566212.1protein NRT1/ PTR FAMILY 5.10 isoform X1                              |
| TCONS_00006657 | -1.19188 | -0.300581 | -1.70555  | BGIOSGA008826 | XP_006648943.1PREDICTED: uncharacterized protein LOC102719840                       |
| TCONS_00029000 | -1.19184 | 0.0331551 | -1.362    | BGIOSGA012046 | XP_006660626.1 sugar transport protein 7                                            |
| TCONS_00002422 | -1.19131 | -0.649217 | -1.38503  | BGIOSGA017264 | XP_006645243.2PREDICTED: uncharacterized protein At4g15970-like                     |
| TCONS_00027653 | -1.19087 | -1.78727  | -2.445    | BGIOSGA034537 | XP_006650308.1 protein DMR6-LIKE                                                    |
| TCONS_00029656 | -1.19078 | -1.66195  | -2.18925  | #N/A          | OXYGENASE 2-like                                                                    |
| TCONS_00013854 | -1.19063 | -2.58931  | -2.89173  | BGIOSGA002791 | XP_006643761.1 very-long-chain (3R)-3-hydroxyacyl-CoA dehydratase PASTICCINO 2A     |
| TCONS_00025864 | -1.19034 | -2.52491  | -1.70937  | BGIOSGA009613 | XP_015695714.1 probable beta-1,3-galactosyltransferase 20                           |
| TCONS_00015529 | -1.19015 | -3.11011  | -2.70984  | BGIOSGA021442 | XP_002448065.2UDP-glycosyltransferase 92A1                                          |
| TCONS_00033393 | -1.18971 | -1.42334  | -1.47002  | BGIOSGA015344 | XP_002451211.1tropinone reductase homolog At5g06060                                 |
| TCONS_00031096 | -1.18934 | -3.12219  | -2.29912  | BGIOSGA032914 | XP_015697374.1 acylamino-acid-releasing enzyme-like                                 |
| TCONS_00005641 | -1.18922 | -2.78934  | -3.12716  | BGIOSGA007756 | XP_004951515.1(6-4)DNA photolyase                                                   |
| TCONS_00009188 | -1.18842 | -0.794909 | -0.72433  | BGIOSGA029410 | XP_006649271.1 F-box protein PP2-A13-like                                           |
| TCONS_00000468 | -1.18827 | 0.550498  | -2.29943  | BGIOSGA025262 | XP_015694473.1 S-type anion channel SLAH3-like isoform X2                           |
| TCONS_00008542 | -1.18756 | -0.545611 | -1.05105  | BGIOSGA014569 | XP_006647648.1 pre-mRNA-splicing ATP-dependent RNA helicase prp28-like              |
| TCONS_00008164 | -1.18706 | -0.391162 | -0.895279 | BGIOSGA026164 | XP_006647363.1 serine/threonine-protein kinase SAPK6                                |
| TCONS_00025717 | -1.18604 | -1.86917  | -1.31933  | BGIOSGA017784 | XP_015695159.1 probable inactive receptor kinase At5g58300                          |
| TCONS_00007161 | -1.18545 | -3.29632  | -0.791188 | BGIOSGA010570 | XP_006648176.2 sucrose synthase 6                                                   |
| TCONS_00014337 | -1.18538 | -1.54176  | -1.59365  | BGIOSGA022765 | XP_015691778.1 aspartic proteinase nepenthesin-1-like                               |
| TCONS_00036764 | -1.18511 | -2.33203  | -1.61658  | BGIOSGA036550 | XP_021302175.1uncharacterized protein LOC8076284                                    |
| TCONS_00025226 | -1.18424 | -0.868305 | -5.46726  | BGIOSGA032229 | XP_024310766.1bisdemethoxycurcumin synthase                                         |
| TCONS_00003364 | -1.184   | -1.19751  | -0.6352   | BGIOSGA001769 | XP_022682683.1S-adenosylmethionine synthase 3                                       |
| TCONS_00018894 | -1.18359 | -0.915678 | -1.29639  | BGIOSGA024453 | XP_006659155.1 topless-related protein 1-like                                       |
| TCONS_00036518 | -1.18357 | -1.84161  | -1.5009   | BGIOSGA009459 | XP_004978420.1probable LRR receptor-like serine/threonine-protein kinase At1g67720  |
| TCONS_00004821 | -1.18276 | -5.16554  | -1.689    | BGIOSGA019907 | XP_006645114.1PREDICTED: uncharacterized protein LOC102717020                       |
| TCONS_00034435 | -1.18239 | -0.464592 | -1.60102  | BGIOSGA034374 | XP_004978893.1DNA polymerase delta catalytic subunit                                |
| TCONS_00030716 | -1.18228 | -2.17764  | -1.4071   | BGIOSGA013634 | XP_006661867.1 homeobox-leucine zipper protein HOX9                                 |
| TCONS_00000040 | -1.18216 | -1.15965  | -1.00285  | BGIOSGA008490 | XP_006649199.2PREDICTED: uncharacterized protein LOC102705229, partial              |
| TCONS_00030435 | -1.18204 | -1.03877  | -0.21982  | BGIOSGA019255 | XP_006660896.1 protein NUCLEAR FUSION DEFECTIVE 4-like                              |

## transcriptome

|                |          |             |           |               |                                                                                                                |
|----------------|----------|-------------|-----------|---------------|----------------------------------------------------------------------------------------------------------------|
| TCONS_00022681 | -1.1812  | -1.48995    | -1.42938  | BGIOSGA003756 | XP_004965689.1 zinc finger protein CONSTANS-LIKE 5                                                             |
| TCONS_00016028 | -1.18117 | -1.76894    | -1.60013  | BGIOSGA006930 | XP_006652380.1 vacuolar iron transporter 1.1                                                                   |
| TCONS_00008281 | -1.18063 | -2.51049    | -2.74223  | BGIOSGA033878 | XP_003559503.1 UDP-glycosyltransferase 91D1                                                                    |
| TCONS_00014497 | -1.17952 | -2.36556    | -2.15957  | BGIOSGA033575 | XP_008678533.1 amino acid permease 4<br>XP_015698058.1 mannan endo-1,4-beta-mannosidase 8-like                 |
| TCONS_00036567 | -1.17945 | -2.85147    | -3.17488  | BGIOSGA000267 | XP_006652710.1 probable purine permease 11                                                                     |
| TCONS_00014831 | -1.17941 | -0.0458613  | -0.921223 | BGIOSGA008838 | XP_006652837.2 probable receptor-like protein kinase At1g30570                                                 |
| TCONS_00016632 | -1.17868 | 0.277237    | 0.352928  | BGIOSGA018383 | XP_006655741.1 PREDICTED: uncharacterized protein LOC102714192                                                 |
| TCONS_00021535 | -1.17821 | -1.11512    | -1.16938  | BGIOSGA022015 | XP_015694488.1 pentatricopeptide repeat-containing protein At1g80270, mitochondrial-like                       |
| TCONS_00023354 | -1.17808 | -1.92586    | -1.08658  | BGIOSGA025396 | XP_015690283.1 PREDICTED: uncharacterized protein LOC102701624                                                 |
| TCONS_00013192 | -1.17663 | 0.167264    | -1.07712  | BGIOSGA008563 | XP_006647639.1 vesicle-associated protein 1-3-like isoform X1                                                  |
| TCONS_00006592 | -1.17639 | -0.395811   | 0.88722   | BGIOSGA016897 | XP_006655797.1 ubiquinone biosynthesis O-methyltransferase, mitochondrial                                      |
| TCONS_00020135 | -1.17619 | 0.670828    | -0.852473 | BGIOSGA022336 | XP_006646688.2 putative amidohydrolase YtcJ                                                                    |
| TCONS_00002540 | -1.17577 | -0.773913   | -0.447411 | BGIOSGA022767 | XP_006644945.1 malate dehydrogenase, chloroplastic-like                                                        |
| TCONS_00002104 | -1.17487 | -0.408836   | -0.855747 | BGIOSGA009738 | XP_004959896.1 protein PYRICULARIA ORYZAE RESISTANCE 21-like                                                   |
| TCONS_00024363 | -1.17386 | #NA         | -1.51148  | BGIOSGA007813 | XP_010237549.1 uncharacterized protein LOC100825130                                                            |
| TCONS_00026069 | -1.17358 | -2.25846    | -1.59591  | BGIOSGA028154 | XP_004958670.1 UDP-glucuronic acid decarboxylase 2                                                             |
| TCONS_00024334 | -1.17326 | -1.9184     | -2.73726  | BGIOSGA004761 | XP_015690746.1 probable leucine-rich repeat receptor-like protein kinase At5g49770                             |
| TCONS_00010000 | -1.17316 | 0.738234    | -0.546745 | BGIOSGA005545 | XP_019703496.1 probable E3 ubiquitin-protein ligase HERC2 isoform X2                                           |
| TCONS_00013811 | -1.17309 | 0.898954    | 0.0894168 | BGIOSGA031261 | XP_006658026.1 probable protein arginine N-methyltransferase 3                                                 |
| TCONS_00024197 | -1.17286 | -0.674394   | -0.375284 | BGIOSGA026235 | XP_015688422.1 PREDICTED: uncharacterized protein LOC102700965                                                 |
| TCONS_00005250 | -1.17281 | 0.372846    | -0.182768 | BGIOSGA007942 | XP_006652895.1 PREDICTED: uncharacterized protein LOC102702651                                                 |
| TCONS_00015037 | -1.17278 | -2.60941    | -1.57951  | BGIOSGA006743 | XP_006645228.2 zinc finger CCCH domain-containing protein 12                                                   |
| TCONS_00004970 | -1.17147 | -1.89281    | -1.86115  | BGIOSGA034018 | XP_006663996.1 beta-galactosidase 15 isoform X1                                                                |
| TCONS_00037091 | -1.17128 | -0.500879   | -0.954331 | BGIOSGA011389 | XP_006644994.1 laccase-12/13-like                                                                              |
| TCONS_00004707 | -1.16962 | #NA         | -3.89474  | BGIOSGA032102 | XP_015693343.1 pentatricopeptide repeat-containing protein At4g38150-like                                      |
| TCONS_00020589 | -1.16912 | 0.771849    | 0.0923152 | BGIOSGA019532 | XP_006654536.1 exocyst complex component EXO70B1                                                               |
| TCONS_00019474 | -1.16854 | -0.189222   | -0.866995 | BGIOSGA012992 | XP_006658148.1 myb family transcription factor APL-like isoform X2                                             |
| TCONS_00025725 | -1.16831 | -1.08052    | -1.26329  | BGIOSGA007162 | XP_004982353.1 F-box/LRR-repeat protein At3g48880                                                              |
| TCONS_00037508 | -1.16769 | -1.1075     | -0.660836 | BGIOSGA010178 | XP_015692846.1 PREDICTED: uncharacterized protein LOC102719442                                                 |
| TCONS_00000610 | -1.16739 | -3.19151    | -0.966631 | BGIOSGA003194 | XP_015688054.1 beta-galactosidase isoform X1                                                                   |
| TCONS_00005106 | -1.1673  | -4.20727    | -1.99007  | BGIOSGA005183 | XP_003576573.1 putative gamma-glutamylcyclotransferase At3g02910                                               |
| TCONS_00034261 | -1.16704 | -0.724927   | 0.248101  | BGIOSGA034532 | XP_015693322.1 peroxidase 24-like                                                                              |
| TCONS_00003597 | -1.16691 | -3.70878    | -1.65442  | BGIOSGA011557 | XP_003577897.2 protein DWARF 53                                                                                |
| TCONS_00032805 | -1.16665 | -2.55109    | -2.21547  | BGIOSGA003414 | #N/A                                                                                                           |
| TCONS_00020288 | -1.16633 | -0.694016   | -0.249146 | #N/A          | XP_006646887.2 probable protein phosphatase 2C 10                                                              |
| TCONS_00005438 | -1.16562 | -1.43476    | -2.8483   | BGIOSGA032811 | XP_015688518.1 PREDICTED: uncharacterized protein LOC102710934                                                 |
| TCONS_00006112 | -1.16552 | -0.397235   | -2.44398  | BGIOSGA003427 | XP_006662995.1 heparan-alpha-glucosaminide N-acetyltransferase-like isoform X1                                 |
| TCONS_00035007 | -1.16518 | -2.51831    | -2.53318  | BGIOSGA007944 | XP_006663572.1 notchless protein homolog                                                                       |
| TCONS_00033767 | -1.16501 | 1.13252     | -0.626726 | BGIOSGA011244 | XP_006643727.1 glycerophosphodiester phosphodiesterase protein kinase domain-containing GDPDL2-like isoform X2 |
| TCONS_00002715 | -1.16469 | -1.44722    | -2.04502  | BGIOSGA002639 | XP_006655779.1 pre-mRNA-splicing factor 38B-like                                                               |
| TCONS_00021595 | -1.16462 | -1.11189    | -1.10753  | BGIOSGA019382 | XP_006654479.2 cytochrome P450 94C1-like                                                                       |
| TCONS_00017899 | -1.16459 | -1.68617    | -2.21272  | BGIOSGA004822 | XP_006655255.1 protein BONZAI 3-like                                                                           |
| TCONS_00017681 | -1.16435 | 0.525037    | -0.950278 | BGIOSGA019743 | XP_020401269.1 myosin heavy chain, striated muscle                                                             |
| TCONS_00013708 | -1.16429 | -5.51943    | -1.69409  | BGIOSGA015865 | XP_006656267.1 cinnamoyl-CoA reductase 2-like                                                                  |
| TCONS_00022587 | -1.16427 | -0.79401    | -0.336682 | BGIOSGA029524 | XP_015694625.1 DNA-directed primase/polymerase protein                                                         |
| TCONS_00023639 | -1.1642  | -1.47515    | -2.5356   | BGIOSGA025664 | XP_006659514.1 blue copper protein-like                                                                        |
| TCONS_00028200 | -1.16408 | -0.645966   | 0.165227  | BGIOSGA014952 | XP_015689345.1 telomere length regulation protein TEL2 homolog                                                 |
| TCONS_00006391 | -1.16326 | -0.687838   | -0.422458 | BGIOSGA006079 | XP_015694426.1 PREDICTED: LOW QUALITY PROTEIN: uncharacterized protein LOC102722408                            |
| TCONS_00022342 | -1.16108 | -0.699831   | -0.677209 | BGIOSGA021131 | XP_015695071.1 PREDICTED: uncharacterized protein LOC107304639                                                 |
| TCONS_00021023 | -1.16108 | -2.28479    | -2.84713  | BGIOSGA037112 | XP_015692248.1 GTPase Der                                                                                      |
| TCONS_00000462 | -1.16082 | -0.201108   | -0.399671 | BGIOSGA003037 | NP_001130701.1 EF hand family protein                                                                          |
| TCONS_00012440 | -1.16081 | -2.66144    | -0.179658 | BGIOSGA028946 | #N/A                                                                                                           |
| TCONS_00007990 | -1.16056 | 6.03003E-05 | 0.643451  | #N/A          | XP_006644271.1 vacuolar cation/proton exchanger 1a                                                             |
| TCONS_00003789 | -1.16045 | -0.954222   | -2.16311  | BGIOSGA020483 | XP_006646035.2 probable protein phosphatase 2C 6                                                               |
| TCONS_00001213 | -1.16023 | -0.662589   | -2.68559  | BGIOSGA037676 |                                                                                                                |

transcriptome

|                |          |           |            |               |                                                                                                              |
|----------------|----------|-----------|------------|---------------|--------------------------------------------------------------------------------------------------------------|
| TCONS_00017406 | -1.15981 | -3.50006  | -1.98712   | BGIOSGA019474 | XP_006654179.1 putative leucine-rich repeat receptor-like protein kinase At2g19210 isoform X1                |
| TCONS_00007907 | -1.15958 | 0.105932  | -0.680912  | #N/A          | #N/A                                                                                                         |
| TCONS_00027227 | -1.15903 | -1.74038  | -0.96213   | BGIOSGA027775 | XP_006659044.1 survival of motor neuron-related-splicing factor 30 isoform X1                                |
| TCONS_00005245 | -1.159   | -1.31084  | -2.81814   | BGIOSGA009326 | XP_003574998.1 cytochrome P450 89A2<br>NP_001168481.1 uncharacterized<br>LOC100382258                        |
| TCONS_00034374 | -1.15864 | 0.104948  | -1.68323   | BGIOSGA037056 | XP_006657341.1 PREDICTED: uncharacterized protein LOC102717169                                               |
| TCONS_00022901 | -1.15827 | -0.919181 | -0.0762556 | BGIOSGA002171 | XP_006648725.1 PREDICTED: uncharacterized protein LOC102718151                                               |
| TCONS_00008166 | -1.15796 | 0.173285  | -0.176837  | BGIOSGA000406 | XP_006659802.1 probable sugar phosphate/phosphate translocator At3g14410                                     |
| TCONS_00027302 | -1.15704 | -0.808383 | -1.46523   | BGIOSGA027701 | XP_006658953.2 formin BNI1-like isoform X2                                                                   |
| TCONS_00024323 | -1.15651 | #N/A      | -2.27349   | BGIOSGA005952 | XP_006661011.1 peptidyl-prolyl cis-trans isomerase CYP19-3 isoform X1                                        |
| TCONS_00029553 | -1.15636 | -0.554323 | -0.864295  | BGIOSGA009094 | XP_006662753.2 transcription factor LHW-like                                                                 |
| TCONS_00033009 | -1.15629 | -1.14961  | -1.17278   | BGIOSGA008794 | XP_004968129.1 uncharacterized protein<br>LOC101783535                                                       |
| TCONS_00002718 | -1.15531 | -1.68556  | -2.60861   | BGIOSGA001576 | XP_006644427.1 mitogen-activated protein kinase 16                                                           |
| TCONS_00004061 | -1.15476 | -1.06279  | -0.885918  | BGIOSGA019167 | XP_006645254.1 F-box only protein 6                                                                          |
| TCONS_00004992 | -1.15436 | -1.52401  | -0.946035  | BGIOSGA000227 | XP_006643939.1 PREDICTED: uncharacterized protein LOC102700836                                               |
| TCONS_00003141 | -1.15431 | -1.58121  | -1.59753   | BGIOSGA002087 | XP_008649396.1 lipoxigenase 9 isoform X1                                                                     |
| TCONS_00009429 | -1.15402 | -1.01528  | -1.2732    | BGIOSGA028973 | XP_006663282.1 F-box/FBD/LRR-repeat protein At5g22660-like isoform X1                                        |
| TCONS_00034483 | -1.15369 | 1.1134    | 0.0708026  | BGIOSGA034250 | XP_006647300.1 40S ribosomal protein S15a-1                                                                  |
| TCONS_00006050 | -1.15362 | -0.437936 | -0.526558  | BGIOSGA024624 | XP_006643675.1 probable receptor-like protein kinase At1g67000                                               |
| TCONS_00000082 | -1.15335 | -1.25604  | -1.94043   | BGIOSGA002652 | XP_006644104.1 probable receptor-like protein kinase At5g18500                                               |
| TCONS_00035452 | -1.15268 | #N/A      | -0.698221  | BGIOSGA004476 | XP_006644108.1 UPF0481 protein At3g47200-like                                                                |
| TCONS_00003395 | -1.15202 | -3.33649  | -2.08901   | BGIOSGA016787 | XP_010240178.1O-glucosyltransferase rumi homolog                                                             |
| TCONS_00014662 | -1.15177 | -0.301182 | -0.172091  | BGIOSGA016825 | XP_006659525.1 translation initiation factor IF-2-like                                                       |
| TCONS_00028225 | -1.15142 | 0.970187  | 0.263151   | BGIOSGA019220 | NP_001306658.1 TPR repeat                                                                                    |
| TCONS_00003494 | -1.15133 | -2.13244  | -1.2036    | BGIOSGA001710 | XP_006651653.1 probable WRKY transcription factor 2                                                          |
| TCONS_00012855 | -1.15069 | 0.0964481 | -0.288205  | BGIOSGA014199 | XP_006649588.1 probable strigolactone esterase D14                                                           |
| TCONS_00009519 | -1.15031 | -1.56601  | 0.446835   | BGIOSGA037929 | XP_006661624.1 E3 ubiquitin-protein ligase At3g02290-like                                                    |
| TCONS_00030701 | -1.14922 | -0.524901 | -0.104314  | BGIOSGA034126 | XP_006653884.1 E3 ubiquitin-protein ligase RNF8-like                                                         |
| TCONS_00015179 | -1.14839 | -2.33978  | -1.7702    | BGIOSGA005008 | XP_006651645.2 PREDICTED: LOW QUALITY PROTEIN: uncharacterized protein<br>LOC102704603                       |
| TCONS_00007873 | -1.14772 | 0.45571   | -1.29575   | BGIOSGA005335 | XP_006660800.1 mimitin, mitochondrial                                                                        |
| TCONS_00030308 | -1.14752 | 0.224161  | 0.703745   | BGIOSGA029500 | XP_002440938.1 transcription initiation factor TFIID subunit 15b                                             |
| TCONS_00019137 | -1.14695 | 0.0922662 | -2.2977    | BGIOSGA001387 | XP_006657419.1 pathogenesis-related protein 1-like                                                           |
| TCONS_00023048 | -1.14695 | #N/A      | -0.712737  | BGIOSGA009167 | XP_006649427.1 cell number regulator 13                                                                      |
| TCONS_00009346 | -1.14649 | -1.31291  | -0.440037  | BGIOSGA001134 | XP_006663179.2 PREDICTED: uncharacterized protein LOC102721030                                               |
| TCONS_00034228 | -1.14574 | -2.71649  | 0.869158   | BGIOSGA003363 | XP_004964061.2 sigma intracellular receptor 2                                                                |
| TCONS_00012821 | -1.14574 | -0.909133 | -0.715805  | BGIOSGA025639 | XP_010907063.1 THO complex subunit 4A                                                                        |
| TCONS_00032796 | -1.14569 | -0.318961 | 0.444828   | BGIOSGA024561 | XP_015689111.1 ASC1-like protein 2                                                                           |
| TCONS_00006796 | -1.14554 | -1.20459  | -1.73469   | BGIOSGA030644 | XP_015689942.1 lysine-specific demethylase JM25-like                                                         |
| TCONS_00010350 | -1.14512 | 0.0901351 | 0.282613   | BGIOSGA012926 | XP_024311529.1 uncharacterized protein<br>LOC100840279                                                       |
| TCONS_00016700 | -1.14454 | -2.71791  | -1.30382   | BGIOSGA014269 |                                                                                                              |
| TCONS_00000133 | -1.1445  | 2.07217   | 1.62327    | #N/A          | #N/A                                                                                                         |
| TCONS_00035022 | -1.14426 | -1.87024  | -0.538985  | BGIOSGA033835 | XP_015697889.1 armadillo repeat-containing protein 7                                                         |
| TCONS_00017247 | -1.14413 | 2.13959   | #N/A       | BGIOSGA019289 | NP_001144377.1 uncharacterized<br>LOC100277300                                                               |
| TCONS_00002688 | -1.144   | 1.86641   | -0.135269  | BGIOSGA014512 | XP_006643666.1 PREDICTED: uncharacterized protein LOC102712757                                               |
| TCONS_00029943 | -1.14337 | -2.71931  | #N/A       | BGIOSGA032361 | XP_006646025.1 putative cyclin-dependent kinase F-2                                                          |
| TCONS_00031960 | -1.14337 | #N/A      | -2.30678   | #N/A          | #N/A                                                                                                         |
| TCONS_00006604 | -1.14299 | -0.535351 | -0.810926  | BGIOSGA020319 | XP_006647651.1 U-box domain-containing protein 33-like                                                       |
| TCONS_00001129 | -1.14265 | -0.608137 | -3.36588   | BGIOSGA017996 | XP_021313622.1 protein NRT1/ PTR FAMILY 6.2<br>XP_015696680.1 lon protease homolog 2, peroxisomal isoform X2 |
| TCONS_00030425 | -1.14253 | -1.21265  | -0.467131  | BGIOSGA029377 | XP_010227418.1 exportin-7-A isoform X1                                                                       |
| TCONS_00003321 | -1.1424  | -0.620227 | -0.123273  | BGIOSGA010243 | XP_006646734.2 pentatricopeptide repeat-containing protein At1g11290, chloroplastic-like                     |
| TCONS_00005180 | -1.14194 | 0.300919  | -0.594658  | BGIOSGA027933 | XP_006660396.1 putative kinase-like protein TMKL1                                                            |
| TCONS_00028487 | -1.14148 | #N/A      | #N/A       | BGIOSGA014148 | XP_015698117.1 beta-carotene isomerase D27, chloroplastic                                                    |
| TCONS_00033742 | -1.14148 | #N/A      | #N/A       | BGIOSGA033680 | #N/A                                                                                                         |
| TCONS_00026356 | -1.1413  | 1.27815   | 0.688006   | #N/A          | #N/A                                                                                                         |
| TCONS_00011774 | -1.14099 | -0.928144 | -0.939092  | BGIOSGA011231 | XP_015691150.1 pre-mRNA-processing factor 39 isoform X1                                                      |
| TCONS_00016820 | -1.14096 | -1.30724  | -1.19738   | BGIOSGA008737 | XP_006652981.1 ubiquitin carboxyl-terminal hydrolase 3-like isoform X1                                       |

transcriptome

|                 |          |           |            |              |                                                                                     |
|-----------------|----------|-----------|------------|--------------|-------------------------------------------------------------------------------------|
| TCONS_00009084  | -1.14088 | 0.216222  | -1.31307   | BGOSGA015052 | XP_004954492.1transcription factor TCP7-like                                        |
| TCONS_00004686  | -1.14071 | -0.263149 | -1.72852   | BGOSGA005997 | XP_015690345.1 dirigent protein 25-like                                             |
| TCONS_000036723 | -1.14056 | -2.0309   | -1.57691   | BGOSGA014059 | XP_004977335.1NDR1/HIN1-like protein 1                                              |
| TCONS_00001518  | -1.14056 | -0.40085  | #NA        | BGOSGA030618 | XP_015689474.1 CASP-like protein 4A3                                                |
| TCONS_00029554  | -1.14048 | #NA       | 2.07824    | BGOSGA011329 | XP_006661578.1 ethylene-responsive transcription factor 1B-like                     |
| TCONS_00014710  | -1.14018 | -2.72325  | -0.992899  | BGOSGA002718 | XP_004976435.1ethylene-responsive transcription factor ERF039                       |
| TCONS_00030875  | -1.14011 | -1.35411  | -0.993081  | #N/A         | #N/A                                                                                |
| TCONS_00006597  | -1.1401  | -1.33128  | -1.1276    | BGOSGA019501 | XP_015689452.1 scarecrow-like protein 6                                             |
| TCONS_00028276  | -1.14007 | -3.09682  | -0.864287  | BGOSGA029544 | XP_006659573.1 beta-glucosidase 27                                                  |
| TCONS_00030868  | -1.13969 | -1.72386  | -2.31605   | BGOSGA032672 | XP_015697394.1PREDICTED: uncharacterized protein LOC102718870 isoform X3            |
| TCONS_00031647  | -1.13969 | 0.112637  | -0.663977  | BGOSGA033470 | XP_002453434.2putative F-box protein At2g02030 isoform X1                           |
| TCONS_00024853  | -1.1395  | 0.320282  | 0.207015   | BGOSGA024521 | XP_002459624.1NDR1/HIN1-like protein 2                                              |
| TCONS_00023214  | -1.13914 | -1.85421  | -0.266297  | BGOSGA036677 | XP_003576348.1protein ZINC INDUCED FACILITATOR-LIKE 1 isoform X1                    |
| TCONS_00026946  | -1.1384  | -0.222992 | -0.203805  | BGOSGA033119 | XP_004972995.1ACT domain-containing protein ACR8                                    |
| TCONS_00030407  | -1.13778 | -3.72628  | -0.818336  | BGOSGA029394 | XP_015696765.1PREDICTED: uncharacterized protein LOC102717925                       |
| TCONS_00016350  | -1.13748 | 0.443264  | -1.58462   | BGOSGA035269 | XP_003580265.1ELMO domain-containing protein A                                      |
| TCONS_00005386  | -1.13742 | -2.68504  | -2.62953   | BGOSGA020577 | XP_006646870.1 squamosa promoter-binding-like protein 3                             |
| TCONS_00027684  | -1.13732 | -0.852397 | -0.321994  | BGOSGA026210 | XP_024371671.1BUD13 homolog                                                         |
| TCONS_00015402  | -1.13724 | 0.935999  | 0.485164   | BGOSGA028391 | XP_006652114.1PREDICTED: uncharacterized protein KIAA0930 homolog                   |
| TCONS_00010673  | -1.13712 | -1.40518  | -1.32248   | #N/A         | #N/A                                                                                |
| TCONS_00031983  | -1.13625 | -0.85375  | 0.412303   | BGOSGA031740 | XP_006647129.1 bifunctional riboflavin kinase/FMN phosphatase-like                  |
| TCONS_00026621  | -1.13616 | -1.34982  | -1.47689   | BGOSGA017241 | XP_002444347.1uncharacterized protein LOC8070096                                    |
| TCONS_00002284  | -1.13601 | -2.92726  | -1.60994   | BGOSGA018021 | XP_006645120.1 UDP-glucuronate:xylan alpha-glucuronosyltransferase 1-like           |
| TCONS_00005100  | -1.13596 | 0.558603  | 0.716482   | BGOSGA034990 | XP_015688309.1 flowering time control protein FY                                    |
| TCONS_00005869  | -1.13488 | -0.61447  | -0.158145  | BGOSGA014550 | XP_015688827.1 GDSL esterase/lipase At2g42990-like isoform X1                       |
| TCONS_00028969  | -1.1348  | -3.73004  | #NA        | BGOSGA034213 | XP_006661202.2 probable cinnamyl alcohol dehydrogenase 8A                           |
| TCONS_00036939  | -1.13466 | 1.07713   | -1.65055   | BGOSGA028494 | XP_022685166.1putative receptor-like protein kinase At4g00960 isoform X1            |
| TCONS_00029030  | -1.13455 | -1.43268  | -1.24142   | BGOSGA029336 | XP_015696557.1 AP2-like ethylene-responsive transcription factor At1g16060          |
| TCONS_00027012  | -1.13437 | 0.105913  | -0.492831  | BGOSGA029062 | XP_006659634.2 glycerophosphodiester phosphodiesterase GDPD1, chloroplastic-like    |
| TCONS_00035450  | -1.13437 | 0.893903  | 1.60927    | BGOSGA036893 | XP_010227211.1uncharacterized protein LOC104581408                                  |
| TCONS_00008956  | -1.13381 | -3.31625  | -2.91567   | BGOSGA005744 | XP_003570444.1putative F-box/FBD/LRR-repeat protein At5g56810                       |
| TCONS_00021561  | -1.13363 | -1.27208  | -0.746194  | BGOSGA006535 | XP_006655761.2 probable protein transport Sec1b                                     |
| TCONS_00036517  | -1.13316 | 0.125877  | 0.191246   | BGOSGA020261 | XP_024312256.1WRKY transcription factor 44 isoform X2                               |
| TCONS_00004375  | -1.13309 | -0.147233 | -0.332496  | BGOSGA020213 | XP_015699322.1PREDICTED: LOW QUALITY PROTEIN: uncharacterized protein LOC102708860  |
| TCONS_00024054  | -1.13302 | -3.56168  | -0.466957  | BGOSGA010527 | XP_015695378.1 probable 6-phosphogluconolactonase 2                                 |
| TCONS_00022041  | -1.1329  | -1.10017  | -1.06994   | BGOSGA037798 | XP_006655993.2PREDICTED: uncharacterized protein LOC102716696, partial              |
| TCONS_00001178  | -1.13282 | -0.23004  | 0.169328   | BGOSGA011837 | XP_015689076.1 protein indeterminate-domain 7                                       |
| TCONS_00034058  | -1.13253 | -0.484968 | -1.33387   | BGOSGA036445 | XP_006663115.1 probable LRR receptor-like serine/threonine-protein kinase At3g47570 |
| TCONS_00029463  | -1.13252 | 0.396371  | -0.633464  | BGOSGA031215 | XP_006661506.2 protein DETOXIFICATION 45, chloroplastic-like                        |
| TCONS_00030257  | -1.13241 | -1.51066  | -1.45971   | BGOSGA035042 | XP_006660768.1 IRK-interacting protein                                              |
| TCONS_00009009  | -1.13189 | -0.885706 | -0.409458  | BGOSGA027089 | XP_002454747.1wall-associated receptor kinase 2                                     |
| TCONS_00023698  | -1.13189 | -2.92635  | -2.01354   | BGOSGA034983 | XP_022680073.1protein ACCELERATED CELL DEATH 6-like                                 |
| TCONS_00009081  | -1.13182 | 0.266215  | -0.528264  | BGOSGA016399 | XP_006649194.1 pentatricopeptide repeat-containing protein At5g38730                |
| TCONS_00030392  | -1.13181 | -0.596301 | -0.265269  | BGOSGA019515 | XP_015696483.1 protein HAPLESS 2-B-like isoform X1                                  |
| TCONS_00014259  | -1.13154 | -0.033708 | -0.429441  | BGOSGA029512 | XP_006652286.1 probable helicase MAGATAMA 3                                         |
| TCONS_00007788  | -1.13132 | -1.73442  | -0.449336  | BGOSGA017098 | XP_015688554.1 ent-copalyl diphosphate synthase 1, chloroplastic                    |
| TCONS_00017427  | -1.12998 | -1.64947  | -1.13627   | BGOSGA035854 | XP_015693222.1 probable LRR receptor-like serine/threonine-protein kinase At1g56140 |
| TCONS_00020546  | -1.12894 | -1.3293   | -3.3041    | BGOSGA029855 | XP_015694302.1 UDP-glycosyltransferase 708A6-like                                   |
| TCONS_00027784  | -1.12859 | -0.140763 | -2.15825   | BGOSGA030233 | XP_015695461.1 protein DCL, chloroplastic                                           |
| TCONS_00002206  | -1.12568 | 1.0824    | -1.21046   | BGOSGA018439 | XP_015692120.1 acidic endochitinase-like                                            |
| TCONS_00028999  | -1.12519 | -1.17687  | -1.47563   | BGOSGA004730 | XP_015696824.1 probable methyltransferase PMT2                                      |
| TCONS_00007501  | -1.12453 | 0.0109692 | -0.0042213 | BGOSGA020308 | XP_015688487.1 putative multidrug resistance protein                                |
| TCONS_00032806  | -1.12447 | -1.3082   | -1.41356   | BGOSGA023035 | NP_001168546.1putative DUF231 domain containing family protein                      |

## transcriptome

|                |          |            |            |               |                                                                                        |
|----------------|----------|------------|------------|---------------|----------------------------------------------------------------------------------------|
| TCONS_00011787 | -1.12417 | -0.556487  | -0.0281122 | BGIOSGA012883 | XP_015690765.1 ninja-family protein<br>Os03g0214200-like                               |
| TCONS_00022734 | -1.12408 | -1.29276   | -0.772887  | BGIOSGA007732 | XP_015693671.1 copper-transporting ATPase<br>RAN1-like                                 |
| TCONS_00012962 | -1.12399 | -1.40362   | -1.01599   | BGIOSGA004890 | XP_015690889.1 protein NRT1/ PTR FAMILY<br>2.11                                        |
| TCONS_00018054 | -1.12321 | -1.80978   | -0.586928  | BGIOSGA000640 | XP_004961641.1 uncharacterized protein<br>LOC101768497                                 |
| TCONS_00023240 | -1.12117 | -1.42574   | -1.60029   | BGIOSGA011249 | XP_006658339.1 histone H1-like<br>XP_015696354.1 WAT1-related protein                  |
| TCONS_00030074 | -1.12078 | -1.68256   | -1.66291   | BGIOSGA029729 | At4g30420-like<br>XP_006656647.1 putative dual specificity protein<br>phosphatase DSP8 |
| TCONS_00020132 | -1.12074 | -2.51447   | -1.51826   | BGIOSGA031400 | XP_006644660.1 protein STICHEL-like 4                                                  |
| TCONS_00004338 | -1.12026 | -2.23107   | -2.2745    | BGIOSGA020237 | XP_015690127.1 PREDICTED: uncharacterized<br>protein LOC102712626, partial             |
| TCONS_00013429 | -1.11967 | 0.165202   | 0.131796   | BGIOSGA012352 | XP_002451987.2L-type lectin-domain containing<br>receptor kinase IV.2                  |
| TCONS_00005883 | -1.11933 | -0.843737  | 0.203523   | BGIOSGA014663 | XP_006649908.1 protein PMR5-like                                                       |
| TCONS_00009843 | -1.11898 | -3.37844   | -1.16998   | BGIOSGA001107 | XP_006655038.1 extensin-2-like                                                         |
| TCONS_00018696 | -1.11799 | 0.451472   | -0.012055  | BGIOSGA003969 | NP_001151098.1 uncharacterized<br>LOC100272871 precursor                               |
| TCONS_00026121 | -1.1178  | -1.71287   | -1.8135    | BGIOSGA039516 | XP_004967344.1 probable transcription factor<br>GLK2                                   |
| TCONS_00003180 | -1.11756 | -2.06578   | -2.05721   | BGIOSGA002043 | XP_010090180.140S ribosomal protein S29                                                |
| TCONS_00036094 | -1.11742 | -1.23007   | -0.697736  | BGIOSGA009740 | XP_022684565.1 uncharacterized protein<br>LOC111258131                                 |
| TCONS_00037888 | -1.11735 | -1.12605   | -1.09892   | BGIOSGA024932 | XP_015694524.1 transcription factor PIF5-like                                          |
| TCONS_00023104 | -1.11694 | -1.46158   | -0.700164  | BGIOSGA017139 | XP_014752433.1 oligopeptide transporter 3                                              |
| TCONS_00013184 | -1.11574 | -1.16648   | -1.32018   | BGIOSGA027199 | XP_004985822.1 chitinase 11                                                            |
| TCONS_00009252 | -1.11555 | 1.50271    | -1.67664   | BGIOSGA023633 | XP_006656078.2 1,4-alpha-glucan-branching<br>enzyme 3, chloroplastic/amyloplastic      |
| TCONS_00020702 | -1.11548 | 1.01692    | 0.0552188  | BGIOSGA040463 | XP_006645424.1 protein NRT1/ PTR FAMILY 6.1                                            |
| TCONS_00000018 | -1.11535 | 0.218941   | -0.880979  | BGIOSGA004895 | XP_006646655.2 probable esterase PIR7A                                                 |
| TCONS_00005041 | -1.1151  | -4.46976   | -2.45306   | BGIOSGA000172 | XP_004962519.1 serine carboxypeptidase 2                                               |
| TCONS_00018954 | -1.11491 | -0.735589  | -0.895162  | BGIOSGA007670 | XP_008652078.1 protein MARD1 isoform X2                                                |
| TCONS_00024655 | -1.11466 | -2.34767   | 0.0619622  | BGIOSGA002254 | XP_008668638.1 malate synthase, glyoxysomal<br>isoform X1                              |
| TCONS_00016136 | -1.11439 | -1.76055   | 0.517165   | BGIOSGA038668 | XP_004951806.1 uncharacterized protein<br>C23H3.12c                                    |
| TCONS_00007361 | -1.11394 | -0.59886   | -0.144604  | BGIOSGA007123 | XP_004967945.1G patch domain-containing<br>protein 4                                   |
| TCONS_00002671 | -1.11378 | 0.236199   | 0.852311   | BGIOSGA012103 | XP_006645076.1 sm-like protein LSM3A                                                   |
| TCONS_00004783 | -1.11356 | -0.241264  | -1.06852   | BGIOSGA000431 | NP_001147488.1 EF hand family protein                                                  |
| TCONS_00016552 | -1.11332 | -2.76653   | -1.01201   | BGIOSGA014415 | XP_006656011.1 PREDICTED: uncharacterized<br>protein LOC102722220                      |
| TCONS_00022092 | -1.11328 | -0.317248  | -2.79492   | BGIOSGA008065 | XP_015692703.1 PREDICTED: uncharacterized<br>protein LOC102712863                      |
| TCONS_00001813 | -1.11319 | -2.70247   | 0.38438    | BGIOSGA018806 | XP_006661585.1 U-box domain-containing<br>protein 33-like                              |
| TCONS_00030577 | -1.11301 | -0.0356608 | -0.155706  | BGIOSGA032412 | XP_006647092.1 40S ribosomal protein S24-1                                             |
| TCONS_00007645 | -1.1128  | 0.101866   | 0.0561249  | BGIOSGA000897 | XP_004958734.1 ETHYLENE INSENSITIVE 3-<br>like 1 protein                               |
| TCONS_00025727 | -1.11274 | -0.818768  | -1.0154    | BGIOSGA013100 | XP_006645045.1 GABA transporter 1                                                      |
| TCONS_00004755 | -1.11192 | -0.973242  | -1.8555    | BGIOSGA001188 | XP_015691642.1 subtilisin-like protease SBT3.9                                         |
| TCONS_00013647 | -1.11149 | -2.94942   | -3.4347    | BGIOSGA035372 | XP_006652859.1 homeobox-leucine zipper<br>protein ROC2                                 |
| TCONS_00016657 | -1.11085 | 0.807272   | -2.18415   | BGIOSGA029405 | XP_015690351.1 protein ELF4-LIKE 3-like                                                |
| TCONS_00012438 | -1.11045 | -0.221783  | -0.821599  | BGIOSGA005411 | XP_004985008.1 ACT domain-containing protein<br>ACR8                                   |
| TCONS_00009685 | -1.11027 | 0.0969534  | -1.48813   | BGIOSGA008975 | XP_006652404.2 beta-glucosidase 10-like                                                |
| TCONS_00016082 | -1.11026 | -1.15301   | -0.465272  | BGIOSGA011222 | XP_006658010.1 PREDICTED: uncharacterized<br>protein LOC102703412 isoform X1           |
| TCONS_00024180 | -1.11026 | -2.27269   | -1.86106   | BGIOSGA026218 | XP_002464873.1 protein HAIKU1                                                          |
| TCONS_00032774 | -1.11006 | 0.539615   | 0.330538   | BGIOSGA031335 | #N/A                                                                                   |
| TCONS_00012211 | -1.10984 | -0.742693  | -0.784129  | #N/A          | XP_015692774.1 CRC domain-containing protein<br>TSO1-like                              |
| TCONS_00019608 | -1.10964 | 0.496264   | 0.225079   | BGIOSGA035877 | XP_006659117.1 sphingoid long-chain bases<br>kinase 1-like                             |
| TCONS_00025923 | -1.10963 | -1.48696   | -0.734822  | BGIOSGA016851 | XP_006648236.2 autophagy protein 5                                                     |
| TCONS_00007243 | -1.10844 | -1.05852   | -0.275506  | BGIOSGA007244 | XP_006661866.2 auxin response factor 22                                                |
| TCONS_00031329 | -1.10839 | -2.03682   | -0.921198  | BGIOSGA016282 | #N/A                                                                                   |
| TCONS_00002222 | -1.10836 | -1.15507   | -0.733109  | #N/A          | XP_006660323.1 exocyst complex component<br>EXO70A1-like                               |
| TCONS_00026994 | -1.10822 | 0.694994   | -0.46848   | BGIOSGA016388 | XP_006661975.1 subtilisin-like protease SBT1.7                                         |
| TCONS_00032593 | -1.10738 | -1.04682   | -1.98992   | BGIOSGA013093 | XP_010937386.1 ABC transporter G family<br>member 11-like isoform X2                   |
| TCONS_00030771 | -1.10722 | -3.57944   | -3.17901   | BGIOSGA036323 | XP_006650085.1 nucleolar protein 56-like                                               |
| TCONS_00012277 | -1.1072  | 0.168408   | 0.286082   | BGIOSGA000206 | XP_006653540.1 anaphase-promoting complex<br>subunit 2                                 |
| TCONS_00014470 | -1.10713 | -1.0856    | -0.943231  | BGIOSGA016629 | XP_021315034.1 putative elongation factor TypA-<br>like SVR3, chloroplastic isoform X1 |
| TCONS_00005852 | -1.10707 | -1.58995   | -2.324     | BGIOSGA014643 | XP_006657889.1 chitin-inducible gibberellin-<br>responsive protein 2                   |
| TCONS_00023988 | -1.10703 | 0.290208   | -0.793687  | BGIOSGA012030 | XP_015696820.1 OTU domain-containing protein<br>At3g57810                              |
| TCONS_00029263 | -1.10693 | -2.28742   | -1.69315   | BGIOSGA028960 | XP_006650875.1 shaggy-related protein kinase<br>kappa-like                             |
| TCONS_00013510 | -1.10682 | 0.717736   | -0.443039  | BGIOSGA006820 | #N/A                                                                                   |
| TCONS_00027379 | -1.10673 | -4.47881   | -4.05918   | #N/A          | XP_015695767.1 quinolone resistance protein<br>NorA-like                               |
| TCONS_00026588 | -1.1066  | -1.80763   | -0.656975  | BGIOSGA030637 |                                                                                        |

## transcriptome

|                |          |            |            |               |                                                                               |
|----------------|----------|------------|------------|---------------|-------------------------------------------------------------------------------|
| TCONS_00007980 | -1.10647 | -0.933695  | 0.959162   | BGIOSGA006504 | XP_006647307.1 putative glutathione-specific gamma-glutamylcyclotransferase 2 |
| TCONS_00032597 | -1.10591 | -0.981137  | -0.835569  | BGIOSGA016958 | XP_006662532.1 cytochrome P450 704C1-like                                     |
| TCONS_00029991 | -1.10577 | -1.58126   | -0.960194  | BGIOSGA030695 | XP_015696332.1 malonyl-CoA decarboxylase, mitochondrial                       |
| TCONS_00000382 | -1.10558 | -0.416122  | 1.21357    | BGIOSGA002237 | XP_015696384.1 B-box zinc finger protein 22                                   |
| TCONS_00002784 | -1.1049  | -2.86437   | -1.87454   | BGIOSGA021550 | XP_006644049.1 PREDICTED: uncharacterized protein LOC102708379                |
| TCONS_00000362 | -1.10477 | -0.894654  | -1.45331   | BGIOSGA002275 | XP_006643871.1 protein indeterminate-domain 11-like                           |
| TCONS_00029085 | -1.104   | -0.483582  | -0.564198  | BGIOSGA030833 | XP_004956923.1 probable polygalacturonase                                     |
| TCONS_00033406 | -1.10393 | -1.80921   | -0.672052  | BGIOSGA019094 | XP_006662874.1 receptor like protein kinase S.2 isoform X1                    |
| TCONS_00032222 | -1.10383 | -0.373869  | -0.761727  | BGIOSGA000264 | XP_004983193.1 uncharacterized protein LOC101753379                           |
| TCONS_00002639 | -1.10311 | -1.52881   | -1.97461   | BGIOSGA005902 | NP_001152540.1 ring zinc finger protein                                       |
| TCONS_00019504 | -1.10297 | -1.11931   | -0.418236  | BGIOSGA004696 | XP_006654546.1 mucin-5AC-like                                                 |
| TCONS_00004979 | -1.10252 | -0.922519  | -2.53943   | BGIOSGA015921 | XP_006645238.1 probable auxin efflux carrier component 6                      |
| TCONS_00027021 | -1.10241 | -0.120011  | 0.479465   | BGIOSGA029230 | XP_014755420.1O-fucosyltransferase 13                                         |
| TCONS_00032148 | -1.10218 | -1.05597   | -1.35528   | BGIOSGA031991 | XP_015697270.1 stress enhanced protein 1, chloroplastic-like                  |
| TCONS_00029485 | -1.10188 | #NA        | -3.88203   | BGIOSGA008700 | XP_006661521.2 cytosolic sulfotransferase 5-like                              |
| TCONS_00009749 | -1.1012  | -1.86903   | -0.883727  | BGIOSGA011936 | XP_006649815.1 PREDICTED: uncharacterized protein LOC102704597                |
| TCONS_00021224 | -1.10113 | -2.03871   | -1.07729   | BGIOSGA000184 | XP_006656365.1 probable potassium transporter 13                              |
| TCONS_00016588 | -1.10077 | -0.596554  | -0.845259  | BGIOSGA014378 | XP_006652797.1 organic cation/carnitine transporter 7                         |
| TCONS_00031771 | -1.10069 | -0.346115  | -0.382492  | BGIOSGA009263 | XP_006662187.2 putative F-box protein At5g38390                               |
| TCONS_00017287 | -1.10069 | 1.06106    | -0.30003   | BGIOSGA025423 | XP_006654141.1 zinc transporter 7                                             |
| TCONS_00029300 | -1.10064 | -0.832557  | -0.585419  | BGIOSGA031042 | XP_021310719.1 tRNA-splicing endonuclease subunit Sen54                       |
| TCONS_00026390 | -1.09965 | -0.549053  | -0.887557  | BGIOSGA028917 | XP_006660049.2 probable galacturonosyltransferase 4                           |
| TCONS_00002762 | -1.09947 | -1.31139   | 0.138088   | BGIOSGA002456 | XP_006643691.1 Bowman-Birk type wound-induced proteinase inhibitor WIP1-like  |
| TCONS_00025804 | -1.09906 | -0.844056  | -3.0786    | BGIOSGA008983 | XP_006659055.1 MADS-box transcription factor 26                               |
| TCONS_00022938 | -1.09839 | 0.88474    | -1.56146   | BGIOSGA010816 | XP_004966508.1 NAC domain-containing protein 67                               |
| TCONS_00008676 | -1.09828 | -2.03602   | -1.26889   | BGIOSGA005754 | XP_006647784.2 PREDICTED: uncharacterized protein LOC102717316 isoform X1     |
| TCONS_00013812 | -1.09768 | 0.368334   | -1.08208   | BGIOSGA020375 | XP_024318798.1 ultraviolet-B receptor UVR8                                    |
| TCONS_00007569 | -1.09683 | -0.310026  | -0.882624  | BGIOSGA003750 | XP_015689511.1 TATA-binding protein-associated factor 2N                      |
| TCONS_00032896 | -1.09566 | -1.32227   | -0.765195  | BGIOSGA012529 | XP_015698179.1 ELMO domain-containing protein C-like                          |
| TCONS_00017328 | -1.09566 | -1.51066   | -0.804201  | BGIOSGA035349 | XP_006655093.1 GDSL esterase/lipase At1g28580-like                            |
| TCONS_00023946 | -1.09531 | -2.11228   | -0.839632  | BGIOSGA022624 | NP_001145964.1 primary amine oxidase precursor                                |
| TCONS_00006406 | -1.09526 | -2.52739   | -1.49184   | BGIOSGA019564 | XP_004953005.1 ankryrin repeat and death domain-containing protein 1A         |
| TCONS_00009845 | -1.09412 | -1.98808   | -2.08375   | BGIOSGA017466 | XP_006649910.1 protein trichome birefringence-like 28                         |
| TCONS_00014826 | -1.09393 | 0.154591   | -0.367904  | BGIOSGA002819 | XP_003580431.1 receptor-like protein kinase FERONIA                           |
| TCONS_00025481 | -1.09393 | 0.753543   | -0.391002  | BGIOSGA023950 | XP_015694897.1 ribosome biogenesis protein WDR12 homolog                      |
| TCONS_00000491 | -1.09345 | -0.794547  | -0.39219   | BGIOSGA008955 | XP_006643959.1 putative ubiquitin-conjugating enzyme E2 38 isoform X3         |
| TCONS_00005806 | -1.093   | -1.17363   | -1.50878   | BGIOSGA028948 | XP_015689079.1 probable WRKY transcription factor 27                          |
| TCONS_00021378 | -1.09225 | -0.932866  | -0.545734  | BGIOSGA000909 | XP_015694314.1 PREDICTED: uncharacterized protein LOC102721372                |
| TCONS_00022843 | -1.0919  | -0.211543  | -0.341598  | BGIOSGA032394 | NP_001149719.1 cell Division Protein AAA ATPase family                        |
| TCONS_00012898 | -1.09156 | -1.32744   | -0.637885  | BGIOSGA029492 | XP_008681422.1 putative O-glycosyl hydrolase family 17 protein isoform X1     |
| TCONS_00007202 | -1.091   | -1.79764   | -0.928782  | BGIOSGA029457 | XP_021320637.1 putative F-box/FBD/LRR-repeat protein At5g56810                |
| TCONS_00009227 | -1.09097 | -1.86067   | -0.44851   | BGIOSGA011183 | XP_004985897.1 probable serine/threonine-protein kinase At1g01540             |
| TCONS_00020080 | -1.09017 | -0.426557  | -0.0809113 | BGIOSGA022260 | XP_006656614.1 GDP-mannose 4,6 dehydratase 1-like                             |
| TCONS_00025979 | -1.0898  | -0.97601   | -1.51669   | BGIOSGA023713 | XP_004972751.1 ABC transporter G family member 14                             |
| TCONS_00036739 | -1.08963 | -2.19432   | -1.67977   | BGIOSGA035796 | XP_006663847.1 deoxyhypusine hydroxylase-A                                    |
| TCONS_00024492 | -1.08935 | -2.04071   | -2.10276   | BGIOSGA015286 | XP_024312030.1 receptor kinase-like protein Xa21                              |
| TCONS_00033121 | -1.08931 | -0.252258  | -0.570359  | BGIOSGA034971 | XP_015697582.1 DNA topoisomerase 2-binding protein 1-A                        |
| TCONS_00005301 | -1.08862 | -0.0462544 | 0.215884   | BGIOSGA011515 | XP_015688994.1 putative HVA22-like protein g                                  |
| TCONS_00024845 | -1.08817 | -0.40245   | -1.22511   | BGIOSGA024524 | XP_006658442.2 IAA-amino acid hydrolase ILR1-like 7                           |
| TCONS_00001722 | -1.08809 | -0.720676  | -0.883285  | BGIOSGA027322 | XP_015689967.1 putative disease resistance protein RGA3                       |
| TCONS_00019186 | -1.08799 | -3.63848   | -0.90431   | BGIOSGA031741 | XP_015693018.1 lichenase-2-like                                               |
| TCONS_00030080 | -1.08774 | -3.14844   | -0.7957    | BGIOSGA028313 | XP_015696356.1 probable xyloglucan glycosyltransferase 2                      |
| TCONS_00007413 | -1.08769 | 0.0214612  | 0.245703   | BGIOSGA007061 | XP_006646931.1 ribonuclease H2 subunit C                                      |
| TCONS_00012963 | -1.086   | -1.78021   | -0.546112  | BGIOSGA005707 | XP_004982145.1 formin-like protein 14                                         |

transcriptome

|                |          |             |            |               |                                                                                               |
|----------------|----------|-------------|------------|---------------|-----------------------------------------------------------------------------------------------|
| TCONS_00017793 | -1.08552 | 0.115467    | -0.333153  | BGIOSGA030818 | XP_015692598.1 gibberellin receptor GID1                                                      |
| TCONS_00001697 | -1.08481 | -0.683579   | 0.291576   | BGIOSGA016328 | XP_015689737.1 alpha-amylase 3, chloroplastic                                                 |
| TCONS_00008902 | -1.08475 | -2.4945     | -1.33621   | BGIOSGA029411 | XP_006647990.1 zinc finger protein 8-like                                                     |
| TCONS_00007544 | -1.08475 | -3.15674    | -2.69054   | #N/A          | #N/A                                                                                          |
| TCONS_00032226 | -1.08435 | -2.46068    | -2.54621   | BGIOSGA016731 | XP_010234737.1 protein indeterminate-domain 12 isoform X1                                     |
| TCONS_00026426 | -1.08388 | -1.56818    | -1.36678   | BGIOSGA007286 | XP_021317531.1 cysteine-rich receptor-like protein kinase 15 isoform X2                       |
| TCONS_00036487 | -1.08324 | 0.526483    | -0.661019  | BGIOSGA024868 | XP_002442601.1 receptor-like protein kinase HAIKU2                                            |
| TCONS_00037288 | -1.08288 | -0.628318   | -0.783153  | BGIOSGA036080 | XP_006664067.1 PREDICTED: uncharacterized protein LOC102710077                                |
| TCONS_00007377 | -1.08282 | 0.707322    | -0.286945  | BGIOSGA007100 | XP_006654671.1 patatin-like protein 1                                                         |
| TCONS_00010233 | -1.08209 | -2.51884    | -2.27858   | BGIOSGA033417 | XP_015692319.1 PREDICTED: uncharacterized protein LOC102702749                                |
| TCONS_00014937 | -1.08181 | -2.32032    | -3.31549   | BGIOSGA028648 | #N/A                                                                                          |
| TCONS_00033344 | -1.0808  | -0.986899   | 0.228266   | #N/A          | #N/A                                                                                          |
| TCONS_00020975 | -1.08038 | -1.46468    | -0.769817  | BGIOSGA009218 | XP_006657104.1 probable protein phosphatase 2C 57                                             |
| TCONS_00015237 | -1.08035 | -1.06858    | -2.04843   | BGIOSGA031737 | XP_015691344.1 PREDICTED: uncharacterized protein LOC102714825                                |
| TCONS_00030115 | -1.08029 | -1.40258    | -2.35797   | BGIOSGA001038 | XP_006660660.1 protein TIFY 10c-like                                                          |
| TCONS_00011927 | -1.08009 | -2.93033    | -0.678304  | BGIOSGA032709 | XP_006649762.2 beta-galactosidase 6                                                           |
| TCONS_00016842 | -1.07997 | -0.303069   | -1.0334    | BGIOSGA014122 | XP_006653004.1 polyamine oxidase 3-like                                                       |
| TCONS_00025924 | -1.07951 | -2.98853    | #N/A       | BGIOSGA028002 | XP_006659119.1 ABC transporter B family member 19-like                                        |
| TCONS_00007786 | -1.07948 | -1.44811    | -1.84892   | BGIOSGA006697 | XP_014754981.1 probable leucine-rich repeat receptor-like protein kinase At1g35710 isoform X1 |
| TCONS_00031945 | -1.07923 | -2.12147    | -1.15951   | #N/A          | #N/A                                                                                          |
| TCONS_00014902 | -1.07917 | 0.835744    | -2.70413   | #N/A          | #N/A                                                                                          |
| TCONS_00017094 | -1.07842 | -2.51707    | -3.04187   | BGIOSGA004259 | XP_015693237.1 ABC transporter B family member 21-like                                        |
| TCONS_00033573 | -1.07829 | -0.973643   | -0.824345  | BGIOSGA001222 | XP_023157963.1 uncharacterized LOC100278526 isoform X2                                        |
| TCONS_00016558 | -1.07809 | -1.104      | -1.05164   | BGIOSGA004742 | XP_015692104.1 serine/threonine-protein kinase minibrain-like isoform X2                      |
| TCONS_00014630 | -1.07752 | -0.00778011 | -1.39185   | BGIOSGA014629 | XP_004976283.1 probable metal-nicotinamine transporter YSL12                                  |
| TCONS_00003341 | -1.0773  | 0.178597    | #N/A       | BGIOSGA006968 | XP_004967647.1 bromodomain adjacent to zinc finger domain protein 2B-like                     |
| TCONS_00031573 | -1.07715 | -0.669582   | 0.659724   | BGIOSGA027939 | XP_003574275.1 protein STRICTOSIDINE SYNTHASE-LIKE 6                                          |
| TCONS_00016283 | -1.07686 | -0.519782   | 0.274917   | BGIOSGA033224 | XP_003581442.1 probable metal-nicotinamine transporter YSL13                                  |
| TCONS_00025314 | -1.07601 | -1.31166    | -1.04986   | BGIOSGA016398 | NP_001105655.2S-domain class receptor-like kinase 3 precursor                                 |
| TCONS_00034554 | -1.0754  | -0.186367   | 1.1888     | BGIOSGA034269 | XP_006663306.1 probable non-inhibitory serpin-Z9                                              |
| TCONS_00020459 | -1.07537 | -1.12894    | -0.550294  | BGIOSGA027385 | XP_015690628.1 protein CHROMATIN REMODELING 35-like                                           |
| TCONS_00018228 | -1.07506 | #N/A        | -1.27146   | BGIOSGA013046 | XP_004961359.1 transcription factor BHLH089                                                   |
| TCONS_00011277 | -1.07481 | -1.5615     | -0.272087  | BGIOSGA012475 | XP_006650853.1 tRNA:m(4) modification enzyme TRM13 homolog                                    |
| TCONS_00014245 | -1.07477 | -0.672577   | -0.594104  | BGIOSGA018741 | XP_006652282.1 G-type lectin S-receptor-like serine/threonine-protein kinase At2g19130        |
| TCONS_00035424 | -1.07437 | -1.0032     | -0.663045  | BGIOSGA006184 | XP_006662472.2 probable trans-2-enoyl-CoA reductase, mitochondrial                            |
| TCONS_00004737 | -1.07364 | -1.55723    | -1.11958   | BGIOSGA027890 | XP_015699263.1 calmodulin-binding receptor-like cytoplasmic kinase 2                          |
| TCONS_00013850 | -1.0735  | -1.5178     | -1.20124   | BGIOSGA025978 | XP_002446210.1 primary amine oxidase                                                          |
| TCONS_00011437 | -1.07312 | -1.18922    | -1.16522   | BGIOSGA021106 | XP_015690736.1 transmembrane and coiled-coil domain-containing protein 4-like                 |
| TCONS_00030472 | -1.07262 | -0.588139   | -0.691993  | BGIOSGA031203 | XP_006660926.1 auxin-responsive protein SAUR36-like                                           |
| TCONS_00013024 | -1.072   | -0.901708   | -0.406626  | BGIOSGA028077 | XP_006650461.1 probable LRR receptor-like serine/threonine-protein kinase At5g10290           |
| TCONS_00019701 | -1.07179 | -0.480109   | -1.44371   | BGIOSGA012080 | XP_004961376.1 probable protein phosphatase 2C 50                                             |
| TCONS_00034327 | -1.07164 | -1.54439    | -2.78527   | BGIOSGA024522 | XP_004978713.1 probable F-box protein At2g36090                                               |
| TCONS_00030021 | -1.07145 | -1.0876     | -0.340534  | #N/A          | #N/A                                                                                          |
| TCONS_00024333 | -1.06958 | -2.17622    | -0.142727  | BGIOSGA008524 | XP_006658112.1 PREDICTED: uncharacterized protein LOC102708450                                |
| TCONS_00004402 | -1.06945 | -0.39226    | 0.00355902 | BGIOSGA001062 | XP_006644713.1 60S ribosomal protein L18a                                                     |
| TCONS_00024656 | -1.06932 | -1.15515    | -0.434225  | BGIOSGA011409 | XP_006657495.1 type I inositol polyphosphate 5-phosphatase 4-like                             |
| TCONS_00029819 | -1.06864 | 0.0933733   | -0.910074  | BGIOSGA024631 | XP_015696879.1 sugar transport protein 14                                                     |
| TCONS_00021672 | -1.06829 | -0.165491   | -1.14988   | BGIOSGA031459 | XP_015694294.1 U-box domain-containing protein 57-like                                        |
| TCONS_00008200 | -1.06767 | 0.259498    | -0.330184  | BGIOSGA006237 | XP_006647395.1 vesicle transport protein SFT2B                                                |
| TCONS_00004078 | -1.06756 | -4.29636    | -2.51676   | BGIOSGA004123 | XP_006646158.1 phospholipase A1-II 4-like                                                     |
| TCONS_00026845 | -1.06752 | -0.578721   | -2.62555   | BGIOSGA004041 | XP_006660244.1 oligopeptide transporter 5-like                                                |
| TCONS_00016503 | -1.06746 | -0.178679   | -0.510528  | BGIOSGA006138 | XP_015691870.1 PREDICTED: uncharacterized protein LOC102718540                                |
| TCONS_00021049 | -1.06746 | -3.17868    | -2.73292   | BGIOSGA013657 | XP_006656565.1 pentatricopeptide repeat-containing protein At1g08070, chloroplastic-like      |
| TCONS_00004680 | -1.06721 | -0.407382   | -0.637155  | BGIOSGA017893 | XP_015690324.1 zinc finger protein CONSTANS-LIKE 2-like                                       |
| TCONS_00028385 | -1.0671  | -0.384441   | 0.432955   | BGIOSGA029461 | XP_006660330.1 zinc finger protein CONSTANS-LIKE 15-like                                      |
| TCONS_00010666 | -1.067   | 0.366933    | -0.425827  | #N/A          | #N/A                                                                                          |

transcriptome

|                |          |            |            |               |                                                                                                |
|----------------|----------|------------|------------|---------------|------------------------------------------------------------------------------------------------|
| TCONS_00025672 | -1.06631 | -1.52141   | -1.90242   | BGIOSGA012614 | XP_002463352.1 zinc finger protein CONSTANS-LIKE 13                                            |
| TCONS_00009150 | -1.06615 | 0.14175    | 0.0711755  | BGIOSGA011675 | XP_015690942.1 cyclin-dependent protein kinase inhibitor EL2                                   |
| TCONS_00013913 | -1.06592 | -1.74837   | -1.0492    | BGIOSGA026786 | XP_009416161.1 tropinone reductase homolog At5g06060-like isoform X1                           |
| TCONS_00004733 | -1.06524 | 0.207553   | -1.92125   | BGIOSGA000481 | XP_003564618.10-fucosyltransferase 19                                                          |
| TCONS_00000481 | -1.06448 | -1.55766   | -3.64391   | BGIOSGA026880 | XP_003565894.2 cytochrome P450 71A1-like                                                       |
| TCONS_00035496 | -1.06436 | -3.63212   | -2.40183   | BGIOSGA018892 | XP_015698595.1 probable apyrase 3                                                              |
| TCONS_00016512 | -1.06402 | 0.804329   | -2.15963   | BGIOSGA017014 | XP_004978197.1 uncharacterized protein LOC101780625                                            |
| TCONS_00023399 | -1.06374 | -2.66242   | -1.89052   | BGIOSGA005776 | XP_006658425.1 DIMBOA UDP-glucosyltransferase BX8-like isoform X1                              |
| TCONS_00018642 | -1.06325 | -0.97424   | -0.671198  | BGIOSGA035689 | XP_015693330.1 ATP-dependent DNA helicase Q-like SIM isoform X2                                |
| TCONS_00007251 | -1.06224 | 0.154747   | -0.526285  | BGIOSGA032793 | XP_006646795.1 pentatricopeptide repeat-containing protein At2g17033                           |
| TCONS_00002345 | -1.06206 | -1.6302    | -1.16218   | BGIOSGA037183 | XP_002456788.1 uncharacterized protein LOC8078680                                              |
| TCONS_00030368 | -1.0616  | -2.65504   | -2.66732   | BGIOSGA026557 | XP_015696797.1 inositol-tetrakisphosphate 1-kinase 6                                           |
| TCONS_00006158 | -1.06154 | -2.18526   | 0.837364   | #N/A          | #N/A                                                                                           |
| TCONS_00024688 | -1.06142 | -2.88238   | -2.54742   | BGIOSGA022343 | XP_015694827.1 PREDICTED: uncharacterized protein ycf45                                        |
| TCONS_00014184 | -1.06096 | 0.143906   | 0.928678   | BGIOSGA016339 | XP_015691442.1 uridylyate kinase                                                               |
| TCONS_00002647 | -1.06064 | -1.41286   | -1.41159   | BGIOSGA018919 | XP_006645412.1 protein NETWORKED 2D-like isoform X1                                            |
| TCONS_00022771 | -1.06053 | -0.0164114 | 1.70933    | BGIOSGA030778 | XP_012700796.1N-alpha-acetyltransferase 38-A, NatC auxiliary subunit                           |
| TCONS_00037433 | -1.06045 | -0.094622  | -1.45562   | BGIOSGA017471 | XP_006664149.1 BTB/POZ domain-containing protein NPY4-like                                     |
| TCONS_00006883 | -1.05887 | -1.85112   | -1.08911   | BGIOSGA009061 | XP_006647899.1 aspartic proteinase-like protein 1                                              |
| TCONS_00004903 | -1.05814 | -1.7346    | -2.02847   | BGIOSGA000318 | XP_015688134.1 PREDICTED: uncharacterized protein At3g49140                                    |
| TCONS_00003061 | -1.05795 | -3.65963   | -2.26132   | BGIOSGA004187 | XP_006645618.1 probable LRR receptor-like serine/threonine-protein kinase MRH1 isoform X2      |
| TCONS_00033587 | -1.05748 | -1.51904   | -2.4754    | BGIOSGA006365 | XP_006662968.1 nudix hydrolase 13, mitochondrial-like                                          |
| TCONS_00013544 | -1.05726 | -1.1544    | 0.428801   | BGIOSGA028831 | XP_006650901.1 PREDICTED: uncharacterized protein At4g14100-like                               |
| TCONS_00022593 | -1.05671 | -0.725906  | -0.684496  | BGIOSGA021330 | XP_006657157.1 potassium transporter 10                                                        |
| TCONS_00014260 | -1.05554 | -2.64703   | -1.53271   | BGIOSGA016421 | XP_006652286.1 probable helicase MAGATAMA 3                                                    |
| TCONS_00007306 | -1.05506 | 1.20291    | 0.343981   | BGIOSGA007176 | XP_015689396.1 structural maintenance of chromosomes protein 3                                 |
| TCONS_00019327 | -1.05401 | -0.505294  | -0.426589  | BGIOSGA014023 | XP_006654428.1 NAC domain-containing protein 82-like isoform X1                                |
| TCONS_00027494 | -1.05383 | -1.52366   | -1.45898   | BGIOSGA027516 | XP_006659017.1 SWR1 complex subunit 2                                                          |
| TCONS_00032784 | -1.05355 | -0.380483  | -0.148651  | BGIOSGA001480 | XP_006662108.1 CSC1-like protein At1g32090                                                     |
| TCONS_00001842 | -1.05314 | 0.390776   | -0.0681711 | BGIOSGA003742 | XP_015692724.1 protein NUCLEAR FUSION DEFECTIVE 6, chloroplastic/mitochondrial-like isoform X4 |
| TCONS_00029002 | -1.05267 | -0.525123  | -1.43676   | BGIOSGA020704 | XP_006661230.1 PREDICTED: uncharacterized protein LOC102705282                                 |
| TCONS_00012236 | -1.05142 | -1.64325   | -0.877054  | BGIOSGA012583 | XP_002467895.1 uroporphyrinogen decarboxylase                                                  |
| TCONS_00005696 | -1.05007 | -2.02157   | -0.91812   | BGIOSGA018650 | XP_004951412.1 pollen-specific protein SF21                                                    |
| TCONS_00021648 | -1.0492  | -1.55308   | -1.67594   | BGIOSGA012682 | XP_015694076.1 GDSL esterase/lipase At5g45910-like                                             |
| TCONS_00000324 | -1.04881 | 0.378411   | 0.873999   | BGIOSGA002899 | XP_006645574.1 probable U3 small nucleolar RNA-associated protein 7                            |
| TCONS_00014833 | -1.04695 | -1.82364   | -0.959979  | BGIOSGA017004 | XP_006653713.2 probable purine permease 11                                                     |
| TCONS_00025500 | -1.04695 | -4.27797   | -4.2       | BGIOSGA020957 | XP_006657931.1 COBRA-like protein 6                                                            |
| TCONS_00035465 | -1.04662 | -0.744864  | -1.24061   | BGIOSGA020050 | XP_006662672.1 non-specific lipid-transfer protein 1                                           |
| TCONS_00022438 | -1.04604 | -0.272241  | -1.63103   | BGIOSGA022324 | XP_006656171.1 cysteine synthase-like                                                          |
| TCONS_00006773 | -1.04547 | -1.60371   | -2.37103   | BGIOSGA012007 | XP_006647807.1 protein ASPARTIC PROTEASE IN GUARD CELL 1-like                                  |
| TCONS_00031737 | -1.04498 | 0.058962   | -1.75495   | BGIOSGA000752 | XP_015694508.1 putative xyloglucan glycosyltransferase 10                                      |
| TCONS_00018035 | -1.04486 | -2.2035    | #N/A       | BGIOSGA016608 | NP_001136636.1 uncharacterized LOC100216764 precursor                                          |
| TCONS_00007145 | -1.04448 | -2.30047   | -0.60586   | #N/A          | #N/A                                                                                           |
| TCONS_00009660 | -1.04443 | -1.63914   | -2.06019   | #N/A          | #N/A                                                                                           |
| TCONS_00016958 | -1.04423 | 0.164884   | -1.81438   | BGIOSGA000359 | XP_015699178.1 probable phosphoribosylformylglycinamide synthase, chloroplastic/mitochondrial  |
| TCONS_00036324 | -1.04371 | -0.777901  | -1.2372    | BGIOSGA020191 | XP_006664153.2 probable disease resistance protein At4g33300                                   |
| TCONS_00036322 | -1.04317 | 0.0149768  | -0.053754  | BGIOSGA009539 | XP_015698687.1 nucleobase-ascorbate transporter 3 isoform X1                                   |
| TCONS_00026238 | -1.04263 | 0.27372    | -1.13641   | BGIOSGA008406 | XP_010235105.1 uncharacterized protein LOC104583707                                            |
| TCONS_00000005 | -1.04204 | 0.68059    | 0.595581   | BGIOSGA033994 | XP_006662936.1 40S ribosomal protein S5                                                        |
| TCONS_00038473 | -1.04191 | -1.86705   | -1.84704   | #N/A          | #N/A                                                                                           |
| TCONS_00020728 | -1.04168 | -1.92062   | -3.03018   | BGIOSGA008889 | XP_004965389.1 protein RADIALIS-like 3                                                         |
| TCONS_00001350 | -1.04027 | -0.378451  | 0.392907   | BGIOSGA003982 | XP_006646092.1 protein disulfide-isomerase LQY1, chloroplastic-like                            |
| TCONS_00015025 | -1.04024 | -1.07879   | -0.653936  | BGIOSGA027558 | XP_015692188.1 transcription factor TGA4-like                                                  |
| TCONS_00028388 | -1.03993 | -1.25546   | -0.697151  | BGIOSGA029459 | XP_006660331.1 ADP-ribosylation factor                                                         |
| TCONS_00026103 | -1.03988 | 0.256925   | -0.190315  | BGIOSGA027844 | XP_003570916.1 disease resistance protein RPP13                                                |



transcriptome

|                |          |           |            |               |                                                                                                   |
|----------------|----------|-----------|------------|---------------|---------------------------------------------------------------------------------------------------|
| TCONS_00030111 | -1.03977 | -3.20978  | -2.80245   | BGIOSGA022065 | XP_003578169.1 uncharacterized protein LOC100827723                                               |
| TCONS_00028752 | -1.03917 | -1.37583  | -1.2813    | BGIOSGA030674 | XP_006660533.1 nucleobase-ascorbate transporter 2-like                                            |
| TCONS_00029624 | -1.03778 | 0.369896  | -0.707872  | BGIOSGA009935 | XP_002466586.1 coatomer subunit alpha-3                                                           |
| TCONS_00010972 | -1.03759 | -1.62758  | -0.222944  | BGIOSGA010891 | XP_006650598.1 meiotic recombination protein SPO11-1                                              |
| TCONS_00009251 | -1.03598 | -0.460547 | 0.588551   | BGIOSGA019382 | XP_002468567.1 probable serine/threonine-protein kinase At4g35230                                 |
| TCONS_00009495 | -1.03571 | -2.3153   | -2.71008   | BGIOSGA027743 | XP_006649563.1 putative polyol transporter 1                                                      |
| TCONS_00031326 | -1.03532 | -4.38532  | -1.73554   | BGIOSGA018736 | XP_006661865.2 uncharacterized membrane protein At1g06890-like isoform X1                         |
| TCONS_00023626 | -1.03516 | -0.893681 | -2.39892   | BGIOSGA034105 | XP_006658538.2 5-pentadecatrienyl resorcinol O-methyltransferase-like                             |
| TCONS_00002689 | -1.03507 | 0.199317  | 0.12442    | BGIOSGA002530 | XP_006643669.1 PREDICTED: uncharacterized protein LOC102713580                                    |
| TCONS_00012576 | -1.03505 | 1.27611   | -1.81422   | BGIOSGA032106 | XP_002466898.1 protein DETOXIFICATION 40                                                          |
| TCONS_00014521 | -1.03493 | -3.21589  | -1.81452   | BGIOSGA004971 | XP_006652464.1 cytochrome b561 and DOMON domain-containing protein At3g07570-like                 |
| TCONS_00020705 | -1.03469 | -0.724243 | -1.07909   | BGIOSGA037206 | XP_015693418.1 PREDICTED: uncharacterized protein LOC102716602                                    |
| TCONS_00018097 | -1.03453 | -2.43996  | -2.58502   | BGIOSGA032703 | XP_015693220.1 jacalin-related lectin 3-like                                                      |
| TCONS_00009337 | -1.03441 | -0.216549 | -1.00845   | BGIOSGA024282 | XP_014752004.1 monooxygenase 2                                                                    |
| TCONS_00014422 | -1.03437 | 0.306963  | -0.49398   | BGIOSGA030974 | XP_006653509.1 ATP-dependent 6-phosphofructokinase 2                                              |
| TCONS_00035315 | -1.03405 | -1.99461  | -2.40166   | BGIOSGA011754 | XP_006663646.1 probable polygalacturonase                                                         |
| TCONS_00020517 | -1.03402 | -1.01541  | -1.43827   | BGIOSGA009622 | XP_015694093.1 transcription factor bHLH49                                                        |
| TCONS_00006772 | -1.03393 | -0.714653 | -1.23204   | BGIOSGA022041 | XP_015688719.1 protein ASPARTIC PROTEASE IN GUARD CELL 2-like                                     |
| TCONS_00007370 | -1.03368 | -1.89553  | -1.35817   | BGIOSGA011629 | XP_015689441.1 tyrosine-sulfated glycopeptide receptor 1-like                                     |
| TCONS_00033254 | -1.03363 | -1.93493  | 0.632851   | BGIOSGA021554 | XP_006662915.1 anthranilate O-methyltransferase 2-like                                            |
| TCONS_00034729 | -1.03347 | -1.83472  | -2.57312   | BGIOSGA003157 | XP_006643998.1 shaggy-related protein kinase alpha                                                |
| TCONS_00032401 | -1.03334 | 0.336772  | -0.496376  | BGIOSGA031716 | XP_006662430.2 phytylsulfokine receptor 1-like                                                    |
| TCONS_00002359 | -1.03306 | -1.77767  | -4.04153   | BGIOSGA000067 | XP_006645185.1 protein NRT1/PTR FAMILY 8.1-like                                                   |
| TCONS_00035607 | -1.0328  | -3.21858  | #NA        | BGIOSGA029105 | XP_003577030.3 cationic amino acid transporter 6, chloroplastic                                   |
| TCONS_00009914 | -1.03247 | -1.21898  | -0.474818  | BGIOSGA015434 | NP_001144260.1 uncharacterized LOC100277134                                                       |
| TCONS_00020511 | -1.03234 | -2.90161  | -2.13608   | BGIOSGA002299 | XP_015693546.1 protein NSP-INTERACTING KINASE 1-like                                              |
| TCONS_00020646 | -1.03167 | -1.21999  | -0.999451  | BGIOSGA012562 | XP_015694280.1 receptor-like protein kinase HERK 1                                                |
| TCONS_00018341 | -1.031   | -2.52286  | -1.01686   | BGIOSGA008058 | XP_010235741.1 uncharacterized protein LOC100846116 isoform X2                                    |
| TCONS_00009160 | -1.03023 | -1.38346  | -1.1908    | BGIOSGA002186 | XP_006649248.1 homeobox-leucine zipper protein HOX10                                              |
| TCONS_00009761 | -1.02921 | -0.116898 | -0.0194555 | BGIOSGA015860 | XP_006651247.1 RNA polymerase sigma factor sigB-like                                              |
| TCONS_00007042 | -1.02801 | -3.04301  | -2.55066   | BGIOSGA023962 | XP_006648064.1 heparanase-like protein 3                                                          |
| TCONS_00024817 | -1.02778 | -1.08712  | -1.88024   | BGIOSGA036789 | XP_002437684.1 uncharacterized protein LOC8066879                                                 |
| TCONS_00037135 | -1.02774 | -3.7201   | -2.10139   | BGIOSGA037332 | NP_001266910.1 fatty acid alpha-dioxygenase                                                       |
| TCONS_00027894 | -1.02755 | 0.230538  | 0.425755   | BGIOSGA027106 | XP_006659456.1 30S ribosomal protein S17                                                          |
| TCONS_00035378 | -1.02706 | -0.75564  | 0.06447    | BGIOSGA030535 | XP_003565888.1 probable WRKY transcription factor 41                                              |
| TCONS_00033797 | -1.02651 | -0.731781 | -3.22476   | BGIOSGA034804 | XP_003577385.1 mannose-6-phosphate isomerase 1                                                    |
| TCONS_00002168 | -1.02648 | -1.04559  | -1.87252   | BGIOSGA012197 | XP_006645009.1 aldo-keto reductase family 4 member C9-like isoform X1                             |
| TCONS_00013972 | -1.02632 | -2.01196  | -1.66015   | BGIOSGA010917 | XP_006656087.2 7-hydroxymethyl chlorophyll a reductase, chloroplastic                             |
| TCONS_00016592 | -1.02572 | 0.381769  | 0.173152   | BGIOSGA035274 | XP_021319511.1 uncharacterized protein LOC8072320 isoform X1                                      |
| TCONS_00008639 | -1.02537 | -1.67876  | 0.0525419  | BGIOSGA010646 | XP_006647741.1 polyamine transporter PUT1 isoform X1                                              |
| TCONS_00015785 | -1.02513 | -0.274637 | -0.415744  | BGIOSGA015198 | XP_006653331.1 mediator of RNA polymerase II transcription subunit 30-like                        |
| TCONS_00011835 | -1.02433 | -0.912312 | 0.109867   | BGIOSGA031252 | XP_006649679.1 squalene monooxygenase-like                                                        |
| TCONS_00013498 | -1.02409 | 0.499049  | -0.609172  | BGIOSGA005643 | XP_006650869.1 G-type lectin S-receptor-like serine/threonine-protein kinase At1g34300 isoform X1 |
| TCONS_00016279 | -1.02402 | -2.03047  | -2.21157   | BGIOSGA005990 | XP_015692195.1 PREDICTED: uncharacterized protein LOC102711878 isoform X2                         |
| TCONS_00017746 | -1.02169 | -0.788464 | -0.0999919 | BGIOSGA019808 | XP_004962183.1 methyltransferase-like protein 13                                                  |
| TCONS_00017917 | -1.02096 | -2.45829  | -1.5904    | BGIOSGA019958 | XP_006654491.1 probable anion transporter 2, chloroplastic                                        |
| TCONS_00000052 | -1.02069 | -0.79857  | -2.80751   | BGIOSGA012808 | XP_004967963.1 transcription factor bHLH168                                                       |
| TCONS_00022908 | -1.02065 | -0.345344 | -0.21527   | BGIOSGA032500 | XP_002439025.1 probable serine/threonine-protein kinase PBL19                                     |
| TCONS_00030173 | -1.01996 | -1.85523  | -1.00564   | BGIOSGA014767 | XP_015696469.1 probable carboxylesterase 2                                                        |
| TCONS_00033122 | -1.01879 | -1.89434  | -1.71632   | BGIOSGA034360 | XP_006662794.2 probable NAD kinase 2, chloroplastic isoform X2                                    |
| TCONS_00006566 | -1.01857 | -0.879579 | -0.951256  | BGIOSGA004589 | XP_010235782.2 phospholipase A1-beta2, chloroplastic                                              |
| TCONS_00031414 | -1.01851 | -2.62729  | -1.48882   | BGIOSGA036042 | XP_004982697.1 calcium uniporter protein 2, mitochondrial                                         |
| TCONS_00021236 | -1.01763 | -0.170855 | -0.607714  | BGIOSGA002704 | XP_015693719.1 probable alpha-glucosidase Os06g0675700                                            |

## transcriptome

|                |           |           |            |               |                                                                                     |
|----------------|-----------|-----------|------------|---------------|-------------------------------------------------------------------------------------|
| TCONS_00013602 | -1.01718  | -0.940354 | -1.04031   | BGIOSGA000248 | XP_006653096.1PREDICTED: uncharacterized protein LOC102716494 isoform X2            |
| TCONS_00025692 | -1.01702  | 0.31709   | -1.15731   | BGIOSGA008455 | XP_015695234.1 serine/arginine-rich-splicing factor SR34 isoform X1                 |
| TCONS_00013208 | -1.01662  | -0.69393  | -1.17107   | BGIOSGA024943 | XP_006650619.1 lamin-like protein                                                   |
| TCONS_00002546 | -1.01654  | -0.274111 | -0.750181  | BGIOSGA033646 | XP_009417414.1 disease resistance RPP13-like protein 4                              |
| TCONS_00019750 | -1.0165   | 0.688835  | 0.0553763  | BGIOSGA004231 | XP_006654750.1 guanine nucleotide-binding protein subunit beta-like protein B       |
| TCONS_00015838 | -1.0163   | -3.04047  | -1.15705   | BGIOSGA006349 | XP_006653368.1PREDICTED: uncharacterized protein At4g22758-like, partial            |
| TCONS_00010254 | -1.016    | -4.68878  | -2.66398   | BGIOSGA012819 | XP_015690546.1 protein GOS9-like                                                    |
| TCONS_00004501 | -1.01517  | -0.478668 | -0.351531  | BGIOSGA017612 | XP_004970165.1 uncharacterized protein LOC101784875                                 |
| TCONS_00003359 | -1.01472  | -2.09474  | -1.2874    | BGIOSGA004259 | XP_015698032.1 ABC transporter B family member 21-like                              |
| TCONS_00008419 | -1.01415  | -2.40226  | -1.0646    | BGIOSGA006001 | XP_006647543.1 phenylalanine ammonia-lyase-like                                     |
| TCONS_00014800 | -1.01308  | -1.29797  | 0.166116   | BGIOSGA004385 | XP_006653698.2 GDSL esterase/lipase At5g41890                                       |
| TCONS_00006106 | -1.01302  | -0.347463 | -0.35486   | BGIOSGA015231 | XP_006653313.2 60S ribosomal protein L35                                            |
| TCONS_00004471 | -1.01279  | -0.595817 | -1.15809   | BGIOSGA037885 | XP_006644767.1 protein CROWDED NUCLEI 4-like                                        |
| TCONS_00034588 | -1.01265  | -1.50374  | -1.20448   | BGIOSGA029627 | XP_008670701.1 probable carboxylesterase 18                                         |
| TCONS_00030075 | -1.01229  | #NA       | -0.667454  | BGIOSGA029730 | XP_015696355.1 WAT1-related protein At4g30420-like                                  |
| TCONS_00001760 | -1.01211  | -3.39981  | -1.40488   | BGIOSGA004396 | XP_004981337.2 uncharacterized protein LOC101764708                                 |
| TCONS_00037561 | -1.01207  | 0.387189  | 0.164522   | BGIOSGA035800 | XP_003577207.1 protein SINE1                                                        |
| TCONS_00015883 | -1.01199  | -2.67181  | -1.46573   | BGIOSGA015103 | XP_022683883.1 protein SET DOMAIN GROUP 41 isoform X2                               |
| TCONS_00013827 | -1.01193  | -0.815064 | -0.530855  | BGIOSGA016004 | XP_006644202.1 putative methyltransferase C9orf114 isoform X1                       |
| TCONS_00012218 | -1.01071  | -1.35149  | -1.53928   | BGIOSGA033241 | XP_015690635.1 valine-tRNA ligase, mitochondrial 1-like                             |
| TCONS_00002785 | -1.00983  | -2.90614  | -1.37943   | BGIOSGA002432 | XP_004968147.2L-Ala-D/L-amino acid epimerase                                        |
| TCONS_00007332 | -1.00898  | -0.433842 | -0.382641  | BGIOSGA023558 | XP_006648300.1 L-arabinokinase                                                      |
| TCONS_00008275 | -1.00844  | -4.6965   | -2.49026   | BGIOSGA008935 | XP_006647434.1 fimbrin-5-like                                                       |
| TCONS_00026623 | -1.00834  | -1.08981  | -1.09953   | BGIOSGA028693 | NP_001183889.1 uncharacterized LOC100502482                                         |
| TCONS_00014850 | -1.00804  | -3.09281  | -2.25878   | BGIOSGA008119 | XP_006652726.1 WEB family protein At5g16730, chloroplastic                          |
| TCONS_00014773 | -1.00791  | -0.259629 | -0.604551  | BGIOSGA016948 | XP_006652665.1 RING-H2 finger protein ATL68-like                                    |
| TCONS_00010053 | -1.00778  | -3.94431  | -2.24009   | BGIOSGA000247 | XP_006651362.2 bidirectional sugar transporter SWEET16                              |
| TCONS_00032818 | -1.00748  | 0.501249  | -1.67953   | BGIOSGA026049 | XP_002441676.1 protein NUCLEAR FUSION DEFECTIVE 4                                   |
| TCONS_00010245 | -1.00741  | -1.49138  | -0.663026  | BGIOSGA010584 | XP_006651476.1PREDICTED: uncharacterized protein C630.12                            |
| TCONS_00017832 | -1.00618  | 0.128573  | 0.135414   | BGIOSGA000369 | XP_006654418.1 serine/arginine repetitive matrix protein 1-like                     |
| TCONS_00033841 | -1.00599  | -0.237599 | -0.304727  | BGIOSGA037430 | XP_006663048.1 DNA repair protein RAD51 homolog A                                   |
| TCONS_00011608 | -1.00561  | -0.738267 | -1.26141   | BGIOSGA011286 | XP_006649437.1 sulfate transporter 3.1-like                                         |
| TCONS_00028045 | -1.00545  | -2.25299  | -1.40928   | BGIOSGA026945 | XP_009351719.2 nucleolin 1                                                          |
| TCONS_00001847 | -1.0049   | -2.82393  | -1.4229    | BGIOSGA004482 | XP_006644728.1PREDICTED: uncharacterized protein LOC102722258                       |
| TCONS_00032155 | -1.00454  | -1.82438  | 0.514816   | BGIOSGA037582 | XP_010665455.1 F-box/kelch-repeat protein At3g23880                                 |
| TCONS_00026764 | -1.00429  | -0.446186 | -1.80774   | BGIOSGA001294 | XP_015695635.1 radial spoke head 1 homolog                                          |
| TCONS_00004759 | -1.00356  | -0.732511 | -0.809553  | BGIOSGA034536 | XP_006645049.1 cytochrome P450 94C1                                                 |
| TCONS_00028364 | -1.00345  | -2.41072  | -1.01145   | BGIOSGA003538 | XP_006660316.2PREDICTED: uncharacterized protein LOC102708176                       |
| TCONS_00018972 | -1.00334  | 0.174113  | -1.20436   | BGIOSGA018393 | XP_024313771.1 putative pentatricopeptide repeat-containing protein At1g19290       |
| TCONS_00021228 | -1.00326  | -1.12472  | -0.138406  | BGIOSGA038150 | XP_015694341.1 BTB/POZ domain-containing protein At1g04390                          |
| TCONS_00037758 | -1.00315  | -1.3124   | -0.26359   | BGIOSGA021667 | XP_004975716.1 putative 12-oxophytodienoate reductase 13 isoform X1                 |
| TCONS_00022134 | -1.0031   | -0.44046  | 0.134436   | BGIOSGA021369 | XP_006653019.2 protein S-acyltransferase 11                                         |
| TCONS_00004374 | -1.00294  | -1.01461  | -0.592824  | BGIOSGA000846 | XP_006646313.1 tryptophan-tRNA ligase, chloroplastic/mitochondrial                  |
| TCONS_00002727 | -1.00285  | 0.710828  | -0.0205652 | BGIOSGA020894 | XP_006643712.1 eukaryotic translation initiation factor 3 subunit A                 |
| TCONS_00037056 | -1.00219  | 1.23961   | 0.71957    | BGIOSGA035211 | XP_006663976.1 serine hydroxymethyltransferase 4-like                               |
| TCONS_00028249 | -1.00176  | -1.06299  | -1.12037   | BGIOSGA006495 | XP_006659550.1 probable protein phosphatase 2C 66                                   |
| TCONS_00024311 | -1.00149  | -0.712    | -0.951687  | BGIOSGA025380 | XP_006658087.2 DNA polymerase zeta catalytic subunit                                |
| TCONS_00018219 | -1.00148  | -1.48215  | 0.224458   | BGIOSGA020278 | XP_015693167.1 probable ADP,ATP carrier protein At5g56450                           |
| TCONS_00006722 | -1.00144  | -1.53135  | -1.42992   | BGIOSGA001223 | XP_006647771.1PREDICTED: uncharacterized protein LOC102713601                       |
| TCONS_00026100 | -1.00024  | -3.16775  | -0.882849  | BGIOSGA019490 | XP_016648188.1 probable LRR receptor-like serine/threonine-protein kinase At1g56140 |
| TCONS_00011300 | -0.998929 | 0.847065  | -1.46089   | BGIOSGA003118 | XP_006650870.1 ammonium transporter 3 member 2                                      |
| TCONS_00005917 | -0.997927 | 0.688192  | 0.562312   | BGIOSGA000047 | XP_002468590.1 cytochrome c oxidase assembly protein COX19                          |
| TCONS_00026164 | -0.997699 | 0.191122  | -0.558016  | BGIOSGA017067 | XP_004972521.160S ribosomal protein L7-3                                            |
| TCONS_00009853 | -0.997309 | 0.112965  | 0.51087    | BGIOSGA004886 | XP_006649915.2 transcription factor bHLH140                                         |

transcriptome

|                |           |            |             |               |                                                                                                        |
|----------------|-----------|------------|-------------|---------------|--------------------------------------------------------------------------------------------------------|
| TCONS_00036177 | -0.997215 | -2.56052   | -2.13994    | BGIOSGA037532 | XP_006664083.2PREDICTED: uncharacterized protein LOC102714792                                          |
| TCONS_00003826 | -0.996838 | -2.41012   | -0.493213   | BGIOSGA034932 | XP_004969001.1transcription factor bHLH87                                                              |
| TCONS_00029779 | -0.996712 | -0.262631  | 0.165919    | BGIOSGA016118 | XP_006661092.1 flowering time control protein FPA                                                      |
| TCONS_00002931 | -0.996386 | 0.163308   | -0.226221   | BGIOSGA007407 | XP_006643814.1 phospholipase D alpha 1                                                                 |
| TCONS_00006602 | -0.996182 | 0.102952   | -0.426796   | BGIOSGA008769 | XP_015688847.1 adenine nucleotide transporter BT1, chloroplastic/amyloplastic/mitochondrial isoform X2 |
| TCONS_00027560 | -0.995918 | -0.102553  | -1.14324    | #N/A          | #N/A                                                                                                   |
| TCONS_00032901 | -0.993968 | -0.734228  | 0.767847    | BGIOSGA036931 | XP_015698767.1 pentatricopeptide repeat-containing protein At5g43790-like isoform X5                   |
| TCONS_00036410 | -0.993861 | -0.866024  | -0.93779    | BGIOSGA013851 | XP_022680515.1transcription factor PIF4 isoform X1                                                     |
| TCONS_00033738 | -0.992783 | 0.312516   | -0.706118   | BGIOSGA025246 | XP_006663003.1 ETO1-like protein 1                                                                     |
| TCONS_00028466 | -0.992127 | 0.313882   | -0.41723    | BGIOSGA031298 | XP_015695696.1PREDICTED: uncharacterized protein At2g27730, mitochondrial-like, partial                |
| TCONS_00009584 | -0.992126 | -2.6122    | -0.858236   | #N/A          | XP_010238423.1uncharacterized protein LOC104584713                                                     |
| TCONS_00029001 | -0.991737 | -1.48886   | 0.0856244   | BGIOSGA030758 | XP_006661229.1 endoribonuclease Dicer homolog 4-like isoform X1                                        |
| TCONS_00030833 | -0.991682 | -0.853941  | -1.19127    | BGIOSGA037797 | XP_006661673.2 protein DETOXIFICATION 16-like                                                          |
| TCONS_00006783 | -0.991464 | 1.23407    | -0.547014   | BGIOSGA021399 | XP_015689666.1 zinc finger protein CONSTANS-LIKE 9 isoform X1                                          |
| TCONS_00030108 | -0.991168 | -0.647337  | -0.310931   | #N/A          | XP_021314494.1uncharacterized protein LOC8072443                                                       |
| TCONS_00004457 | -0.991046 | -1.12647   | -1.12393    | BGIOSGA028069 | XP_004970074.1clp protease adapter protein ClpF, chloroplastic                                         |
| TCONS_00015881 | -0.990609 | -0.653411  | -0.964672   | BGIOSGA005484 | XP_003579736.2RNA-binding motif protein, X-linked-like-3                                               |
| TCONS_00010601 | -0.989953 | -0.109603  | -0.158347   | BGIOSGA025179 | XP_008446394.1 transcription elongation factor spt5-like                                               |
| TCONS_00006365 | -0.988873 | 0.014588   | 0.463424    | #N/A          | #N/A                                                                                                   |
| TCONS_00022950 | -0.988867 | -1.50916   | -0.95942    | BGIOSGA020497 | XP_006657373.1 protease 2                                                                              |
| TCONS_00002337 | -0.98804  | -0.17997   | -0.711007   | BGIOSGA004979 | XP_006645167.1PREDICTED: uncharacterized protein LOC102708665                                          |
| TCONS_00002092 | -0.987782 | 0.0387149  | -0.667252   | BGIOSGA034639 | XP_015688323.1PREDICTED: uncharacterized protein LOC102702810                                          |
| TCONS_00022691 | -0.98751  | -0.508112  | -0.660378   | BGIOSGA028256 | XP_006656322.2 villin-4-like isoform X1                                                                |
| TCONS_00015333 | -0.987492 | 0.597816   | -2.16454    | BGIOSGA015653 | XP_015691362.1 probable DNA double-strand break repair Rad50 ATPase                                    |
| TCONS_00008428 | -0.987428 | -0.669206  | -0.232485   | BGIOSGA035852 | XP_006647551.1 phytosulfokine receptor 1-like                                                          |
| TCONS_00030474 | -0.987403 | -1.33888   | -0.499557   | BGIOSGA012392 | XP_006660925.1 auxin-responsive protein SAUR36-like                                                    |
| TCONS_00007566 | -0.987303 | -1.57235   | #N/A        | BGIOSGA006917 | XP_004951526.1F-box/kelch-repeat protein At1g55270                                                     |
| TCONS_00011871 | -0.987073 | -1.10796   | -0.356066   | BGIOSGA017012 | XP_015698346.1 protein misato homolog 1                                                                |
| TCONS_00025772 | -0.987003 | -1.4028    | -4.16577    | BGIOSGA011347 | XP_004972397.1casparian strip membrane protein 2                                                       |
| TCONS_00035311 | -0.985779 | -1.72628   | -0.905799   | BGIOSGA033603 | XP_015697736.1 alkylated DNA repair protein alkB homolog 8                                             |
| TCONS_00031104 | -0.984594 | -0.726596  | -0.193164   | BGIOSGA033702 | XP_006661778.1 GDP-mannose 3,5-epimerase 1                                                             |
| TCONS_00021225 | -0.984427 | -0.715597  | 0.20617     | BGIOSGA023449 | XP_004966296.2twinkle homolog protein, chloroplastic/mitochondrial isoform X1                          |
| TCONS_00028973 | -0.984398 | -2.57602   | -1.17228    | BGIOSGA015228 | XP_003579585.1protein XR11 isoform X2                                                                  |
| TCONS_00004082 | -0.984128 | -0.769009  | -3.17295    | BGIOSGA001104 | XP_012701771.1uncharacterized protein LOC101769092 isoform X2                                          |
| TCONS_00024747 | -0.98407  | -1.57644   | -0.365741   | BGIOSGA030778 | XP_006664896.1 leucine-rich repeat receptor-like tyrosine-protein kinase PXC3                          |
| TCONS_00016661 | -0.983545 | 0.00786343 | 0.217916    | BGIOSGA014300 | XP_006652862.1 APO protein 4, mitochondrial                                                            |
| TCONS_00003164 | -0.983497 | -1.25523   | -1.05904    | BGIOSGA002056 | XP_015688094.1 protein DEFECTIVE IN MERISTEM SILENCING 3                                               |
| TCONS_00028434 | -0.983474 | -2.57719   | -3.17458    | BGIOSGA024777 | XP_006659659.2 probable carboxylesterase 8                                                             |
| TCONS_00009358 | -0.983361 | 0.775522   | -0.601733   | BGIOSGA032942 | XP_015691182.1 formin-like protein 20                                                                  |
| TCONS_00005454 | -0.9828   | -1.47431   | -1.14306    | BGIOSGA007563 | XP_006649634.1 GDP-mannose transporter GONST3 isoform X2                                               |
| TCONS_00002739 | -0.982486 | -1.11977   | -0.311462   | BGIOSGA002484 | XP_006664941.1 Bowman-Birk type bran trypsin inhibitor-like                                            |
| TCONS_00019669 | -0.98248  | -2.25651   | -2.59208    | BGIOSGA001676 | XP_015688234.1 indole-3-pyruvate monooxygenase YUCCA6-like                                             |
| TCONS_00006232 | -0.982321 | -0.659596  | -0.57125    | BGIOSGA010030 | XP_006647356.2 myosin-8-like                                                                           |
| TCONS_00026716 | -0.981725 | -0.485298  | -0.0919027  | BGIOSGA006729 | NP_001309038.1uncharacterized protein LOC100192502                                                     |
| TCONS_00033720 | -0.9817   | -0.772068  | -0.00905277 | BGIOSGA021101 | XP_015698120.1PREDICTED: uncharacterized protein LOC102709967 isoform X1                               |
| TCONS_00025809 | -0.981606 | -0.284921  | -0.786894   | BGIOSGA010816 | XP_006659059.1 transcription factor JUNGBRUNNEN 1-like                                                 |
| TCONS_00024108 | -0.981592 | -3.65867   | -1.52174    | BGIOSGA026143 | XP_004978851.1dirigent protein 21                                                                      |
| TCONS_00023125 | -0.981583 | -0.120139  | -0.304799   | BGIOSGA018187 | XP_020396804.1transcription factor PCF6                                                                |
| TCONS_00023296 | -0.981338 | -0.813623  | -0.464564   | BGIOSGA008021 | XP_015694551.1 F-box protein CPR30-like                                                                |
| TCONS_00011828 | -0.981217 | #N/A       | -1.59521    | BGIOSGA014541 | XP_006649669.1 probable receptor-like serine/threonine-protein kinase At4g34500                        |
| TCONS_00031875 | -0.981151 | -0.585241  | -0.427567   | BGIOSGA032256 | XP_006366028.1PREDICTED: uncharacterized protein LOC102601474                                          |
| TCONS_00005746 | -0.981043 | -1.18793   | -1.72117    | BGIOSGA005164 | XP_006648492.1PREDICTED: uncharacterized protein LOC102717409                                          |
| TCONS_00016438 | -0.980766 | -0.836841  | -0.779705   | BGIOSGA025669 | XP_015692045.1 protein argonaute 1B isoform X2                                                         |
| TCONS_00010603 | -0.979498 | 0.640205   | -0.377058   | BGIOSGA037825 | XP_003561753.1protein DYAD                                                                             |
| TCONS_00021331 | -0.978845 | -0.555525  | -0.932263   | BGIOSGA033901 | XP_006656453.2 auxin response factor 19                                                                |
| TCONS_00012065 | -0.977572 | -0.603793  | 2.68641     | BGIOSGA021489 | XP_006651276.2 asparagine synthetase [glutamine-hydrolyzing] 1                                         |

transcriptome

|                |           |            |            |               |                                                                                                                          |
|----------------|-----------|------------|------------|---------------|--------------------------------------------------------------------------------------------------------------------------|
| TCONS_00013469 | -0.976931 | 0.86205    | -0.526896  | BGIOSGA018395 | XP_006650837.1 bifunctional epoxide hydrolase 2-like isoform X2                                                          |
| TCONS_00013165 | -0.97572  | -0.339844  | -0.123205  | BGIOSGA009819 | XP_006650576.1 tRNA (guanine-N(7))-methyltransferase non-catalytic subunit wdr4                                          |
| TCONS_00006578 | -0.975572 | -0.903443  | -0.320839  | BGIOSGA014816 | XP_006647627.1 dnaJ protein homolog 2-like isoform X2                                                                    |
| TCONS_00006720 | -0.97509  | -3.68143   | -1.54552   | BGIOSGA022921 | XP_015689596.1 protein RADIALIS-like 3                                                                                   |
| TCONS_00018417 | -0.975059 | -1.83632   | 0.189532   | BGIOSGA020470 | XP_015692831.1 RNA polymerase sigma factor sigC                                                                          |
| TCONS_00027451 | -0.975045 | 0.421054   | 0.640536   | BGIOSGA030419 | XP_015696148.1 DNA polymerase I A, chloroplastic-like                                                                    |
| TCONS_00022462 | -0.974773 | -0.119887  | 0.287962   | BGIOSGA007798 | XP_006657074.2 U-box domain-containing protein 34                                                                        |
| TCONS_00025902 | -0.974658 | -0.997912  | -2.03367   | BGIOSGA002232 | XP_003573373.1 transcription factor MYBS3                                                                                |
| TCONS_00026566 | -0.974215 | -1.10294   | -1.66873   | BGIOSGA027900 | XP_006662182.1 F-box/LRR-repeat protein 4-like                                                                           |
| TCONS_00014920 | -0.973787 | -3.15198   | -1.87539   | BGIOSGA032093 | XP_006653760.1 36.4 kDa proline-rich protein-like                                                                        |
| TCONS_00023641 | -0.973501 | -2.25799   | -2.0045    | BGIOSGA033358 | XP_015694626.1 protein CURVATURE THYLAKOID 1B, chloroplastic                                                             |
| TCONS_00025531 | -0.973295 | -1.16596   | 0.669804   | BGIOSGA019930 | XP_015694870.1 ethylene-responsive transcription factor ERF073-like                                                      |
| TCONS_00001394 | -0.972831 | -4.5134    | -2.11524   | BGIOSGA019208 | XP_006646123.1 kinesin-13A isoform X1                                                                                    |
| TCONS_00027183 | -0.972498 | -0.446123  | -1.26622   | BGIOSGA027816 | XP_015695830.1 uncharacterized N-acetyltransferase ycf52                                                                 |
| TCONS_00016307 | -0.971687 | -1.2201    | -1.24644   | BGIOSGA026416 | XP_024312165.1(+)-neomenthol dehydrogenase-like isoform X2                                                               |
| TCONS_00005757 | -0.970199 | -0.232946  | -0.31026   | BGIOSGA007870 | XP_006648498.1 PREDICTED: uncharacterized protein LOC102719650                                                           |
| TCONS_00011034 | -0.969598 | -1.08103   | -0.0529487 | BGIOSGA031108 | XP_006651853.1 protein PHLOEM PROTEIN 2-LIKE A10-like                                                                    |
| TCONS_00031097 | -0.969424 | 0.396631   | -0.735238  | BGIOSGA032920 | XP_015697098.1 chitinase 2-like                                                                                          |
| TCONS_00005561 | -0.969269 | -0.371241  | 0.263542   | BGIOSGA003306 | XP_015688476.1 probable WRKY transcription factor 60                                                                     |
| TCONS_00028049 | -0.968882 | -0.223631  | -0.408677  | BGIOSGA036512 | XP_006659425.1 dihydrolipoylysine-residue acetyltransferase component 4 of pyruvate dehydrogenase complex, chloroplastic |
| TCONS_00022885 | -0.968631 | -0.674789  | 1.2447     | BGIOSGA020559 | XP_015693405.1 WAT1-related protein At3g45870-like                                                                       |
| TCONS_00027352 | -0.968053 | -0.250432  | -0.656079  | BGIOSGA027646 | XP_006659118.2 HEAT repeat-containing protein 6                                                                          |
| TCONS_00015764 | -0.967819 | -2.5234    | -2.59449   | BGIOSGA006417 | XP_012703058.1F-box/keich-repeat protein At1g67480                                                                       |
| TCONS_00009355 | -0.967712 | -0.794126  | -0.228361  | BGIOSGA012049 | XP_004985625.1 protein SUPPRESSOR OF GENE SILENCING 3 homolog                                                            |
| TCONS_00031548 | -0.96666  | -1.65934   | -5.1162    | BGIOSGA030297 | XP_006662008.1 aspartic proteinase nepenthesin-1-like                                                                    |
| TCONS_00000817 | -0.966256 | -1.516     | -0.294552  | BGIOSGA003405 | XP_006644131.1 craniofacial development protein 1                                                                        |
| TCONS_00002686 | -0.966206 | -2.40644   | -1.182     | BGIOSGA016276 | XP_006643662.1 peptidyl-prolyl cis-trans isomerase CYP26-2, chloroplastic                                                |
| TCONS_00014379 | -0.965331 | -1.3819    | -1.07474   | BGIOSGA008481 | XP_015692123.1 PREDICTED: uncharacterized protein LOC102712799                                                           |
| TCONS_00037656 | -0.96527  | -2.41174   | -1.23585   | BGIOSGA030520 | XP_015689456.1 26S proteasome non-ATPase regulatory subunit 2 homolog A-like                                             |
| TCONS_00000313 | -0.965015 | -0.344858  | -0.820162  | BGIOSGA002887 | XP_015695852.1 putative disease resistance protein RGA3                                                                  |
| TCONS_00005305 | -0.964749 | 0.411014   | 0.182857   | BGIOSGA006261 | XP_015688435.1 UTP:RNA uridylyltransferase 1                                                                             |
| TCONS_00007710 | -0.964509 | -0.206945  | 1.06315    | BGIOSGA032313 | XP_010233742.1 putative F-box protein At3g16210                                                                          |
| TCONS_00021042 | -0.964374 | -1.08286   | -0.199069  | BGIOSGA016289 | XP_002437294.1 uncharacterized protein LOC8083462                                                                        |
| TCONS_00010157 | -0.964345 | 0.398427   | 0.00522099 | BGIOSGA023845 | XP_006650124.1 pyruvate dehydrogenase (acetyl-transferring) kinase, mitochondrial-like isoform X1                        |
| TCONS_00031674 | -0.964274 | 0.306229   | -0.537133  | BGIOSGA032547 | XP_012698381.1 transcription factor MYC2-like                                                                            |
| TCONS_00016296 | -0.963702 | -0.327697  | -0.525334  | BGIOSGA005968 | XP_015691524.1 ferredoxin-thioredoxin reductase, variable chain                                                          |
| TCONS_00010859 | -0.963627 | -2.73162   | 0.128076   | BGIOSGA037808 | NP_001150853.1 glucan endo-1,3-beta-glucosidase 7 precursor                                                              |
| TCONS_00002351 | -0.963347 | -0.42856   | -1.23144   | BGIOSGA033344 | XP_002456792.2 transcription factor bHLH128                                                                              |
| TCONS_00020788 | -0.963113 | -0.0207675 | -0.0695921 | BGIOSGA030330 | XP_006656996.1 protein DGCR14                                                                                            |
| TCONS_00001139 | -0.963085 | -1.26893   | -0.58681   | BGIOSGA003764 | XP_006644265.1 PREDICTED: uncharacterized protein LOC102703434                                                           |
| TCONS_00034100 | -0.962436 | 0.340136   | 1.65817    | BGIOSGA035743 | XP_004978278.1 scarecrow-like protein 33                                                                                 |
| TCONS_00036170 | -0.962242 | 0.356487   | -0.209294  | #N/A          | #N/A                                                                                                                     |
| TCONS_00034569 | -0.961991 | -0.341353  | -0.16547   | BGIOSGA035884 | XP_006663315.2 PHD finger protein At1g33420-like                                                                         |
| TCONS_00001325 | -0.961503 | -0.795568  | -1.99817   | BGIOSGA004607 | XP_014755012.1 amino-acid permease BAT1 homolog isoform X2                                                               |
| TCONS_00011376 | -0.961315 | -0.779651  | -0.511667  | BGIOSGA001314 | XP_006652045.1 probable cytokinin riboside 5'-monophosphate phosphoribohydrolase LOGL5                                   |
| TCONS_00034419 | -0.960265 | -1.0105    | -1.16891   | BGIOSGA036542 | XP_006662779.1 protein-tyrosine-phosphatase PTP1-like isoform X1                                                         |
| TCONS_00000557 | -0.959474 | -1.32121   | -1.4596    | BGIOSGA020406 | XP_006643991.1 cytosolic isocitrate dehydrogenase [NADP]-like                                                            |
| TCONS_00013982 | -0.95889  | -1.14302   | -1.92392   | BGIOSGA021442 | XP_002462695.1 UDP-glycosyltransferase 85A5                                                                              |
| TCONS_00029483 | -0.958744 | -1.16602   | -1.87383   | BGIOSGA031237 | XP_006660956.1 uncharacterized transporter YBR287W-like                                                                  |
| TCONS_00013081 | -0.957389 | -1.09222   | -1.90739   | BGIOSGA025996 | XP_015690044.1 vacuolar protein sorting-associated protein 62-like                                                       |
| TCONS_00036096 | -0.957225 | -1.47203   | -1.26057   | BGIOSGA009740 | XP_009405891.2 40S ribosomal protein S29                                                                                 |
| TCONS_00034372 | -0.956353 | -2.30795   | -1.15719   | BGIOSGA034766 | XP_004978774.1 abscisic stress-ripening protein 3                                                                        |

transcriptome

|                |           |           |             |               |                                                                                         |
|----------------|-----------|-----------|-------------|---------------|-----------------------------------------------------------------------------------------|
| TCONS_00019467 | -0.955465 | -1.8641   | -3.18071    | BGIOSGA027689 | XP_006654530.1 protein trichome birefringence-like 28                                   |
| TCONS_00011572 | -0.955237 | -2.31994  | -2.92027    | BGIOSGA003321 | XP_015690286.1 WAT1-related protein At2g39510-like                                      |
| TCONS_00023929 | -0.955117 | -0.673849 | 0.181001    | BGIOSGA005071 | XP_015694899.1 probable arabinosyltransferase ARAD1                                     |
| TCONS_00007742 | -0.95464  | 0.722803  | 0.352224    | BGIOSGA031010 | NP_001336967.1 uncharacterized LOC100383799 isoform 1                                   |
| TCONS_00000348 | -0.954199 | -0.747341 | -1.15586    | BGIOSGA002924 | XP_006643857.1 probable 2-oxoglutarate-dependent dioxygenase At3g49630 isoform X1       |
| TCONS_00030252 | -0.954112 | -0.991428 | 0.0019048   | #N/A          | #N/A                                                                                    |
| TCONS_00037552 | -0.953327 | -0.281474 | -0.539548   | BGIOSGA021834 | XP_006664757.1 PREDICTED: uncharacterized protein LOC102721330                          |
| TCONS_00024621 | -0.95327  | -0.541967 | -2.45856    | #N/A          | #N/A                                                                                    |
| TCONS_00022974 | -0.953031 | -1.01518  | -0.672155   | BGIOSGA025008 | XP_006658201.1 photosynthetic NDH subunit of luminal location 3, chloroplast            |
| TCONS_00010754 | -0.952988 | -1.39395  | -1.51485    | BGIOSGA013378 | XP_006650437.2 nuclear transcription factor Y subunit A-4-like                          |
| TCONS_00022838 | -0.952588 | -0.279795 | -0.652908   | BGIOSGA039024 | XP_006657287.2 protein STAR1 isoform X2                                                 |
| TCONS_00001376 | -0.951836 | -0.705101 | -0.786951   | BGIOSGA011606 | XP_015697882.1 probable polygalacturonase                                               |
| TCONS_00013241 | -0.951273 | -1.54449  | -0.293613   | BGIOSGA010900 | XP_003558752.1 transcription factor MYB4                                                |
| TCONS_00008591 | -0.951148 | 0.431106  | -0.589378   | BGIOSGA005837 | XP_006647692.1 protein TRANSPARENT TESTA GLABRA 1-like                                  |
| TCONS_00015972 | -0.951148 | -1.77142  | -0.867997   | #N/A          | XP_014660848.2F-box protein At5g03100                                                   |
| TCONS_00012407 | -0.950959 | #N/A      | #N/A        | BGIOSGA026145 | XP_004984090.1F-box only protein 13                                                     |
| TCONS_00016042 | -0.950936 | -2.86684  | 0.236065    | BGIOSGA025174 | XP_003579927.1 peroxidase 31                                                            |
| TCONS_00021031 | -0.950802 | -1.86701  | -0.657352   | BGIOSGA012642 | XP_015693889.1 zinc finger protein WIP2                                                 |
| TCONS_00035437 | -0.950756 | -2.58108  | -2.05586    | BGIOSGA000250 | XP_003577897.2 protein DWARF 53                                                         |
| TCONS_00006307 | -0.950052 | -1.12954  | -1.57001    | BGIOSGA015502 | XP_004956311.1ent-copalyl diphosphate synthase 2 isoform X2                             |
| TCONS_00008245 | -0.950013 | 0.714745  | 0.295883    | BGIOSGA032386 | XP_006648784.1 cell number regulator 2-like isoform X1                                  |
| TCONS_00001413 | -0.949993 | -0.224175 | -0.379253   | BGIOSGA009879 | NP_001105724.2siroheme uroporphyrinogen methyltransferase 1                             |
| TCONS_00021538 | -0.949755 | -2.10627  | -1.8601     | BGIOSGA016958 | XP_006655746.1 cytochrome P450 704C1                                                    |
| TCONS_00000757 | -0.949706 | -0.568711 | -0.71559    | BGIOSGA003147 | XP_006645808.1 heavy metal-associated isoprenylated plant protein 26-like               |
| TCONS_00009772 | -0.949555 | -1.56863  | -2.00677    | BGIOSGA005358 | XP_006651249.1 telomere repeat-binding protein 5-like                                   |
| TCONS_00018153 | -0.949555 | -1.13268  | -2.48415    | BGIOSGA007831 | XP_008649914.1 uncharacterized protein LOC103630644                                     |
| TCONS_00022957 | -0.949307 | -3.11116  | -1.72357    | BGIOSGA012281 | XP_006657378.2 sulfoquinovosyl transferase SQD2-like                                    |
| TCONS_00004661 | -0.949298 | -0.73141  | -0.652473   | BGIOSGA020026 | XP_006644948.1 PREDICTED: uncharacterized protein LOC102716267                          |
| TCONS_00013423 | -0.949208 | -1.93613  | -2.12074    | BGIOSGA021588 | XP_004981275.1 protein trichome birefringence-like 33 isoform X1                        |
| TCONS_00024127 | -0.948839 | -1.32563  | -1.11898    | BGIOSGA005974 | XP_015694729.1 GLABRA2 expression modulator-like                                        |
| TCONS_00035423 | -0.948807 | -1.51325  | -0.803251   | BGIOSGA015373 | XP_024311120.1 phototropin-1A isoform X4                                                |
| TCONS_00013313 | -0.948698 | 0.42161   | 0.402235    | BGIOSGA025523 | XP_006650706.1 probable aldehyde oxidase 2                                              |
| TCONS_00014326 | -0.948613 | 0.415636  | -0.0106984  | BGIOSGA030461 | XP_015691988.1 peptidyl-prolyl cis-trans isomerase FKBP53                               |
| TCONS_00004357 | -0.947919 | -1.33459  | -0.986418   | BGIOSGA002938 | XP_006644676.1 ATP-dependent 6-phosphofructokinase 6-like                               |
| TCONS_00028956 | -0.947721 | -0.467695 | #N/A        | BGIOSGA006930 | XP_006660605.1 vacuolar iron transporter 1.2                                            |
| TCONS_00021717 | -0.947678 | -0.118317 | -1.04611    | BGIOSGA032863 | XP_006655844.1 putative clathrin assembly protein At5g35200                             |
| TCONS_00019413 | -0.946592 | -0.866151 | -0.491423   | BGIOSGA038061 | XP_006654493.1 phosphatidylinositol:ceramide inositolphosphotransferase-like isoform X1 |
| TCONS_00017020 | -0.9465   | -7.19434  | -2.15341    | BGIOSGA019825 | XP_006653984.1 125 kDa kinesin-related protein-like                                     |
| TCONS_00015917 | -0.946399 | -1.29861  | -0.883529   | BGIOSGA006274 | XP_015692355.1 PREDICTED: uncharacterized protein LOC102714282 isoform X2               |
| TCONS_00000708 | -0.946273 | -2.74371  | -2.15151    | BGIOSGA030133 | XP_006644084.1 CBL-interacting protein kinase 1                                         |
| TCONS_00014912 | -0.944515 | -0.731553 | 1.07664     | BGIOSGA022759 | XP_006652802.1 PREDICTED: uncharacterized protein LOC102721266                          |
| TCONS_00011631 | -0.944294 | -1.5347   | 0.155106    | BGIOSGA011379 | XP_006649462.1 PREDICTED: uncharacterized protein LOC102722193                          |
| TCONS_00019717 | -0.943931 | -0.824139 | -1.41079    | BGIOSGA004297 | XP_006654725.2 60S ribosomal protein L28-1-like                                         |
| TCONS_00011744 | -0.94367  | -0.259817 | -0.624115   | BGIOSGA011262 | XP_006649584.1 dual-specificity RNA methyltransferase RlmN                              |
| TCONS_00012243 | -0.943554 | -0.748707 | -3.60904    | BGIOSGA025361 | XP_006650061.1 phyloplanin                                                              |
| TCONS_00004328 | -0.942196 | 0.0771322 | -0.426127   | BGIOSGA001265 | XP_006644655.1 cytochrome P450 72A15-like                                               |
| TCONS_00029084 | -0.941866 | -1.61759  | -1.05674    | BGIOSGA023300 | XP_006651080.1 probable mannan synthase 4                                               |
| TCONS_00008241 | -0.941806 | -1.52935  | -0.00882715 | BGIOSGA030748 | XP_006647414.1 PREDICTED: uncharacterized protein LOC102704395 isoform X1               |
| TCONS_00022841 | -0.941578 | -3.11773  | -0.664839   | BGIOSGA007965 | XP_004966138.1 probable xyloglucan endotransglucosylase/hydrolase protein 25            |
| TCONS_00032554 | -0.941463 | -1.602    | -1.67883    | BGIOSGA015066 | XP_006662507.2 kinesin-II 85 kDa subunit-like                                           |
| TCONS_00002738 | -0.941385 | -1.98931  | -1.58387    | BGIOSGA003024 | XP_006664941.1 Bowman-Birk type bran trypsin inhibitor-like                             |
| TCONS_00032564 | -0.941372 | 1.10926   | 0.0482775   | BGIOSGA026540 | XP_002464376.1 trimeric transcription factor GTL1 isoform X1                            |
| TCONS_00005530 | -0.940843 | -1.90254  | -0.777871   | BGIOSGA020724 | XP_006648357.1 haloacid dehalogenase-like hydrolase domain-containing protein 3         |
| TCONS_00020818 | -0.940765 | -1.40514  | -0.585419   | BGIOSGA006757 | XP_015694209.1 cyclic nucleotide-gated ion channel 1-like isoform X2                    |
| TCONS_00002266 | -0.940744 | 0.3678    | 0.171131    | BGIOSGA023450 | XP_006645095.1 patellin-3-like                                                          |
| TCONS_00032493 | -0.94033  | 0.565509  | -0.00420296 | BGIOSGA005967 | XP_021302280.1ALG-2 interacting protein X                                               |
| TCONS_00024756 | -0.939979 | -2.50506  | -1.7276     | BGIOSGA024619 | XP_010234976.1 exocyst complex component EXO70E2                                        |

transcriptome

|                |           |            |            |               |                                                                                         |
|----------------|-----------|------------|------------|---------------|-----------------------------------------------------------------------------------------|
| TCONS_00021218 | -0.939558 | -0.657441  | 0.350517   | BGIOSGA007063 | XP_015693726.1 OTU domain-containing protein DDB_G0284757-like                          |
| TCONS_00027668 | -0.939161 | -0.998648  | -1.02426   | BGIOSGA009182 | XP_015696108.1 probable E3 ubiquitin-protein ligase XBOS35 isoform X3                   |
| TCONS_00034867 | -0.939095 | -1.38433   | -0.778042  | BGIOSGA034453 | XP_006663448.1 PREDICTED: uncharacterized protein LOC102714137                          |
| TCONS_00022661 | -0.938619 | -1.63526   | -0.660023  | BGIOSGA029907 | XP_008659852.2 protein POLAR LOCALIZATION DURING ASYMMETRIC DIVISION AND REDISTRIBUTION |
| TCONS_00001127 | -0.938608 | #NA        | #NA        | BGIOSGA006914 | XP_006644277.1 zinc finger Ran-binding domain-containing protein 2-like                 |
| TCONS_00024913 | -0.938349 | -0.512021  | -0.448473  | BGIOSGA024474 | XP_015694465.1 zinc transporter 5 isoform X2                                            |
| TCONS_00013517 | -0.938227 | 0.676742   | -0.113757  | BGIOSGA024490 | XP_008669094.1 late embryogenesis abundant protein group 2 isoform X1                   |
| TCONS_00030205 | -0.937697 | -1.16516   | -0.808761  | BGIOSGA032427 | XP_021309449.1 putative wall-associated receptor kinase-like 16                         |
| TCONS_00014682 | -0.937544 | -2.44426   | -2.20911   | BGIOSGA025077 | XP_006653626.1 uncharacterized membrane protein At1g16860-like                          |
| TCONS_00011264 | -0.937362 | 0.264919   | -0.681915  | BGIOSGA009241 | XP_006650841.1 GATA transcription factor 15                                             |
| TCONS_00014578 | -0.936814 | 1.18483    | -0.103381  | BGIOSGA016742 | XP_015694539.1 BTB/POZ domain-containing protein At5g41330-like                         |
| TCONS_00028163 | -0.936589 | -0.673433  | -1.13636   | BGIOSGA001926 | XP_003572289.1 abscisic acid 8'-hydroxylase 2                                           |
| TCONS_00005830 | -0.936535 | -1.12237   | -0.973298  | BGIOSGA007954 | XP_015688551.1 zinc finger Ran-binding domain-containing protein 2-like                 |
| TCONS_00014495 | -0.936238 | -0.456233  | -0.0158684 | BGIOSGA002733 | XP_015692102.1 PT11-like tyrosine-protein kinase 3                                      |
| TCONS_00010990 | -0.936197 | -0.488406  | -1.86374   | BGIOSGA000697 | XP_010229614.1 cyclic nucleotide-gated ion channel 2 isoform X1                         |
| TCONS_00019852 | -0.935785 | 0.216482   | 0.486943   | BGIOSGA006142 | XP_006655618.1 probable 2-oxoglutarate-dependent dioxygenase AOP1                       |
| TCONS_00033719 | -0.935635 | -1.15717   | -1.40651   | BGIOSGA001614 | XP_015698121.1 PREDICTED: uncharacterized protein LOC102709967 isoform X2               |
| TCONS_00032261 | -0.935516 | -0.601797  | -0.941148  | BGIOSGA017253 | XP_015697141.1 probable receptor-like protein kinase At5g56460                          |
| TCONS_00013082 | -0.934344 | 0.325273   | -0.0479314 | BGIOSGA009900 | XP_004981950.1 calcium load-activated calcium channel                                   |
| TCONS_00031672 | -0.934105 | -0.028041  | -0.323156  | BGIOSGA034622 | XP_004983564.1 abscisic acid receptor PYR1                                              |
| TCONS_00028924 | -0.933584 | -3.10194   | -2.10874   | BGIOSGA001431 | XP_006490151.18-amino-7-oxononanoate synthase                                           |
| TCONS_00019548 | -0.933578 | -2.10604   | -0.571212  | BGIOSGA017051 | XP_006654580.1 protein PHR1-LIKE 1-like                                                 |
| TCONS_00006745 | -0.933044 | 0.652264   | -0.695059  | BGIOSGA010956 | XP_015689276.1 RNA-binding protein 24-like isoform X1                                   |
| TCONS_00019770 | -0.932841 | -1.03515   | 0.0646105  | BGIOSGA017586 | XP_020394454.1 uncharacterized LOC100274886 isoform X1                                  |
| TCONS_00029325 | -0.932134 | -1.27742   | -0.380628  | BGIOSGA029074 | XP_015696734.1 chitin elicitor receptor kinase 1-like                                   |
| TCONS_00001326 | -0.932005 | -0.934014  | -0.112702  | BGIOSGA029256 | XP_015693383.1 PREDICTED: uncharacterized protein LOC102704385                          |
| TCONS_00028406 | -0.931422 | -0.0602834 | -0.998683  | BGIOSGA003179 | NP_001140822.1 protein MTD1                                                             |
| TCONS_00002916 | -0.931344 | -1.19628   | -0.3693    | BGIOSGA019251 | XP_015699306.1 tryptophan aminotransferase-related protein 1-like                       |
| TCONS_00026060 | -0.931192 | 0.123798   | -0.551644  | BGIOSGA001116 | XP_015695518.1 transcription factor GTE7-like                                           |
| TCONS_00002720 | -0.931166 | -1.74362   | -1.40668   | BGIOSGA002507 | XP_015692142.1 protein O-linked-mannose beta-1,4-N-acetylglucosaminyltransferase 2-like |
| TCONS_00019308 | -0.930361 | -2.06422   | -1.31335   | BGIOSGA004945 | XP_006654414.1 protein root UVB sensitive 6-like                                        |
| TCONS_00027462 | -0.930345 | -3.15091   | -3.13479   | BGIOSGA022577 | XP_015695513.1 zinc finger Ran-binding domain-containing protein 2-like                 |
| TCONS_00012443 | -0.930278 | 1.74354    | -1.38005   | BGIOSGA023817 | XP_006651497.1 PREDICTED: uncharacterized protein LOC102716029                          |
| TCONS_00006171 | -0.929982 | 0.980965   | 0.689602   | BGIOSGA018768 | XP_003575046.1 inositol polyphosphate multikinase IPK2                                  |
| TCONS_00005101 | -0.929704 | -0.801791  | -1.19976   | BGIOSGA004822 | XP_004971279.1 cytochrome P450 94A2                                                     |
| TCONS_00032903 | -0.929181 | -3.42677   | -1.44231   | BGIOSGA034037 | XP_015698011.1 alpha-L-arabinofuranosidase 1-like isoform X2                            |
| TCONS_00007497 | -0.928933 | #NA        | -2.12036   | BGIOSGA008300 | XP_015688486.1 RPM1-interacting protein 4-like                                          |
| TCONS_00020910 | -0.928351 | 0.415007   | 0.100585   | BGIOSGA023115 | XP_015693619.1 PREDICTED: uncharacterized protein LOC102720612                          |
| TCONS_00009672 | -0.928295 | -1.40819   | 1.35918    | BGIOSGA015371 | XP_021307440.1 thaumatin-like protein 1b                                                |
| TCONS_00028587 | -0.927986 | -1.65794   | -1.07943   | BGIOSGA030331 | XP_006660438.2 sulfate transporter 4.1, chloroplastic-like                              |
| TCONS_00030166 | -0.927779 | -1.52431   | -0.386262  | BGIOSGA029537 | XP_003574625.1 uncharacterized protein LOC100834941                                     |
| TCONS_00015896 | -0.92769  | -3.10939   | -3.22298   | BGIOSGA027805 | XP_006653405.1 PI-PLC X domain-containing protein At5g67130-like                        |
| TCONS_00016498 | -0.926598 | 0.287218   | -1.07013   | BGIOSGA028771 | XP_002448408.2 rRNA 2'-O-methyltransferase fibrillar                                    |
| TCONS_00037266 | -0.926544 | -0.7889    | -5.08976   | BGIOSGA030346 | XP_004962897.1 polyol transporter 5                                                     |
| TCONS_00010833 | -0.926494 | -0.223366  | -0.640979  | BGIOSGA018041 | XP_006651750.1 protein POLLEN DEFECTIVE IN GUIDANCE 1                                   |
| TCONS_00005843 | -0.926228 | -2.45963   | -2.29601   | BGIOSGA022418 | NP_001152138.1 leucoanthocyanidin dioxygenase                                           |
| TCONS_00031400 | -0.926077 | -2.28045   | -1.11363   | BGIOSGA031614 | XP_006654334.1 AB hydrolase superfamily protein YfhM-like                               |
| TCONS_00003078 | -0.925875 | -0.78974   | -0.712895  | BGIOSGA006796 | XP_015688137.1 potassium channel KAT2 isoform X1                                        |
| TCONS_00025800 | -0.925874 | -0.467153  | -0.328435  | BGIOSGA027864 | XP_006659750.1 far upstream element-binding protein 2-like                              |
| TCONS_00014562 | -0.925543 | 0.473619   | -0.406987  | BGIOSGA035916 | XP_006652485.1 adenine phosphoribosyltransferase 2-like                                 |
| TCONS_00030821 | -0.925472 | -0.861526  | -1.49772   | BGIOSGA022624 | XP_006649028.1 dynamin-2A-like                                                          |
| TCONS_00004377 | -0.925069 | -0.0770549 | -0.33637   | BGIOSGA000843 | XP_006646315.1 golgin-84                                                                |
| TCONS_00035485 | -0.924744 | 1.19201    | -0.422758  | BGIOSGA036899 | XP_006663164.2 bifunctional epoxide hydrolase 2-like                                    |

transcriptome

|                |           |            |            |               |                                                                                                |
|----------------|-----------|------------|------------|---------------|------------------------------------------------------------------------------------------------|
| TCONS_00028934 | -0.924366 | 0.202542   | 0.00728588 | BGIOSGA025290 | XP_006660596.1 chromatin remodeling protein EBS                                                |
| TCONS_00031192 | -0.923031 | -1.49447   | -0.186096  | BGIOSGA033012 | XP_006662379.1 inactive protein RESTRICTED TEV MOVEMENT 2-like                                 |
| TCONS_00024901 | -0.922983 | -2.31878   | 0.167036   | #N/A          | #N/A                                                                                           |
| TCONS_00036587 | -0.922658 | -1.77599   | -0.924425  | BGIOSGA034587 | XP_006662812.1 pentatricopeptide repeat-containing protein At4g18975, chloroplastic isoform X2 |
| TCONS_00032516 | -0.922399 | -2.78632   | -0.799376  | BGIOSGA031606 | XP_004982691.1glutamyl-tRNA reductase 2                                                        |
| TCONS_00017452 | -0.921928 | -3.84356   | -1.06567   | BGIOSGA000084 | XP_004955595.1uncharacterized protein LOC101778584                                             |
| TCONS_00003163 | -0.921913 | -1.89971   | -0.154212  | BGIOSGA010719 | XP_015688294.1 E3 ubiquitin-protein ligase SINAT3-like                                         |
| TCONS_00021003 | -0.921035 | -1.82328   | -2.56533   | BGIOSGA014738 | XP_002437256.1zinc finger protein AEBP2                                                        |
| TCONS_00035377 | -0.919699 | 0.726534   | -0.217013  | BGIOSGA036370 | XP_015698062.1 putative disease resistance RPP13-like protein 2 isoform X2                     |
| TCONS_00004207 | -0.919697 | 0.00915952 | -1.04027   | BGIOSGA029386 | XP_015697623.1 probable serine/threonine-protein kinase At1g18390 isoform X1                   |
| TCONS_00009871 | -0.919466 | -0.30612   | -1.0882    | BGIOSGA003683 | XP_006649934.2 pentatricopeptide repeat-containing protein At1g62350                           |
| TCONS_00028741 | -0.919461 | #NA        | 0.274033   | #N/A          | #N/A                                                                                           |
| TCONS_00024905 | -0.918966 | -0.467242  | -1.24263   | BGIOSGA010141 | XP_015691433.1 E3 ubiquitin protein ligase DRIP1-like                                          |
| TCONS_00000336 | -0.918105 | -3.2634    | -1.05164   | BGIOSGA027939 | XP_015696513.1 plant cysteine oxidase 2-like                                                   |
| TCONS_00012518 | -0.917881 | -0.606694  | -0.437128  | BGIOSGA010465 | XP_006650236.1 allene oxide cyclase 3, chloroplastic-like                                      |
| TCONS_00000242 | -0.917838 | -0.827625  | -1.89483   | BGIOSGA011469 | XP_015698452.1 receptor-like protein kinase HERK 1                                             |
| TCONS_00016940 | -0.917787 | -1.40132   | -1.46683   | BGIOSGA019011 | XP_015692409.1 ras-related protein RABC1-like                                                  |
| TCONS_00030268 | -0.917754 | -1.46835   | -1.1464    | BGIOSGA012010 | XP_006660270.1 uncharacterized abhydrolase domain-containing protein DDB_G0269086-like         |
| TCONS_00018660 | -0.917521 | 0.207942   | 0.0875917  | BGIOSGA018775 | XP_004977085.1dihydropolyl dehydrogenase 1, chloroplastic                                      |
| TCONS_00011146 | -0.917443 | -1.65163   | -0.0484659 | #N/A          | #N/A                                                                                           |
| TCONS_00001799 | -0.917314 | -1.31051   | -0.102311  | BGIOSGA021835 | XP_006644688.1 auxin-responsive protein IAA6-like isoform X3                                   |
| TCONS_00029315 | -0.917041 | -0.0832413 | 0.340634   | BGIOSGA018101 | XP_004957290.1uncharacterized protein LOC101771681                                             |
| TCONS_00020516 | -0.916245 | -0.438562  | 0.060202   | BGIOSGA022686 | XP_015694091.1 histone-lysine N-methyltransferase EZ1                                          |
| TCONS_00005012 | -0.915632 | -0.511631  | -1.95825   | BGIOSGA010727 | XP_004971151.1transcription factor ICE1                                                        |
| TCONS_00005622 | -0.915169 | -0.528838  | 0.608295   | BGIOSGA020904 | XP_015689613.1PREDICTED: uncharacterized protein LOC102719462                                  |
| TCONS_00006917 | -0.914755 | -0.503598  | -0.592963  | BGIOSGA014996 | XP_006647957.1 galactoside 2-alpha-L-fucosyltransferase-like                                   |
| TCONS_00001035 | -0.914583 | -0.2248    | -3.90781   | BGIOSGA032366 | XP_021314501.1MDIS1-interacting receptor like kinase 2                                         |
| TCONS_00020770 | -0.914072 | -5.31291   | -1.90909   | BGIOSGA005771 | XP_006664961.1 transcription factor bHLH83-like                                                |
| TCONS_00010570 | -0.914009 | 0.441899   | -0.324282  | BGIOSGA029795 | XP_003578091.1plant UBX domain-containing protein 2                                            |
| TCONS_00036105 | -0.913696 | -1.31523   | -0.193351  | BGIOSGA013425 | XP_006650479.1 putative disease resistance RPP13-like protein 3                                |
| TCONS_00018595 | -0.912861 | -0.158265  | -1.25493   | BGIOSGA018840 | NP_001151868.1uncharacterized protein LOC100285504                                             |
| TCONS_00006358 | -0.912861 | -2.48019   | -3.06228   | BGIOSGA037215 | NP_001145028.1uncharacterized protein LOC100278203                                             |
| TCONS_00011142 | -0.912544 | -1.72987   | -2.32792   | BGIOSGA025295 | XP_003559293.1SEC12-like protein 1                                                             |
| TCONS_00009284 | -0.912325 | -0.447573  | -0.743763  | BGIOSGA004822 | XP_006649380.1 alkane hydroxylase MAH1-like                                                    |
| TCONS_00004960 | -0.912212 | -0.858019  | -1.38683   | BGIOSGA016888 | XP_006645221.1 transcription factor bHLH77 isoform X2                                          |
| TCONS_00024667 | -0.912124 | -0.326157  | -0.141309  | BGIOSGA007474 | XP_006657501.1 phosphopantetheine adenylyltransferase 1                                        |
| TCONS_00000134 | -0.911923 | 0.743141   | 1.54311    | BGIOSGA036561 | XP_006643693.1 ethylene-responsive transcription factor ERF036-like                            |
| TCONS_00032792 | -0.911652 | -1.71813   | -0.683589  | BGIOSGA007417 | XP_006662113.1 cyclin-dependent kinase E-1                                                     |
| TCONS_00017148 | -0.911323 | -0.792811  | -0.915913  | BGIOSGA002664 | XP_015692482.1 beta-glucuronosyltransferase GlcAT14A-like                                      |
| TCONS_00031296 | -0.911041 | 0.834074   | -1.33857   | BGIOSGA032396 | XP_006661849.1 protein NRT1/ PTR FAMILY 5.2-like                                               |
| TCONS_00018808 | -0.910958 | -2.89743   | #NA        | BGIOSGA018613 | XP_004969848.1E3 ubiquitin-protein ligase MARCH2                                               |
| TCONS_00024557 | -0.910886 | 1.2136     | 0.0333615  | BGIOSGA024834 | XP_015694525.1PREDICTED: uncharacterized protein LOC102705264, partial                         |
| TCONS_00012375 | -0.910795 | -0.16199   | -1.01717   | BGIOSGA010609 | XP_004984160.1metacaspase-1 isoform X2                                                         |
| TCONS_00021044 | -0.910637 | 0.892218   | -0.332648  | BGIOSGA023275 | XP_015693766.1 putative disease resistance protein RGA3                                        |
| TCONS_00005537 | -0.910101 | -1.93391   | -1.011     | BGIOSGA006138 | XP_004951742.1uncharacterized protein LOC101780165                                             |
| TCONS_00036530 | -0.909934 | 1.82017    | 0.178219   | BGIOSGA030709 | XP_006663145.1 transcription activator GLK2-like                                               |
| TCONS_00024097 | -0.909207 | 0.68097    | -1.83367   | BGIOSGA034685 | XP_015694723.1 inter alpha-trypsin inhibitor, heavy chain 4                                    |
| TCONS_00002897 | -0.909194 | -1.65608   | -0.751244  | BGIOSGA030129 | XP_009776295.1 HORMA domain-containing protein 1-like isoform X2                               |
| TCONS_00004856 | -0.907707 | -1.26235   | -0.386242  | BGIOSGA006660 | XP_003564797.1CLP protease regulatory subunit CLPX1, mitochondrial                             |
| TCONS_00006802 | -0.907458 | -1.30556   | -1.55293   | BGIOSGA029665 | XP_006647837.1 homeobox-leucine zipper protein HOX16 isoform X1                                |
| TCONS_00001583 | -0.907184 | -0.592566  | -1.80581   | BGIOSGA036429 | XP_004969565.1 uncharacterized protein LOC101755436                                            |
| TCONS_00027533 | -0.906969 | -3.3079    | -1.89054   | BGIOSGA002597 | XP_006659208.1 NAC domain-containing protein 21/22-like                                        |
| TCONS_00014333 | -0.906828 | 0.644612   | -0.834307  | BGIOSGA012197 | XP_006652337.2 non-functional NADPH-dependent codeinone reductase 2-like                       |

## transcriptome

|                |           |             |            |               |                                                                                    |
|----------------|-----------|-------------|------------|---------------|------------------------------------------------------------------------------------|
| TCONS_00007770 | -0.906547 | -2.19718    | -0.588614  | BGIOSGA018450 | XP_006647151.1 D-amino-acid transaminase, chloroplastic-like                       |
| TCONS_00019532 | -0.906339 | -2.78814    | -2.04713   | BGIOSGA028511 | XP_021303324.1 myb-related protein 2                                               |
| TCONS_00009126 | -0.906239 | -1.03856    | -0.503196  | BGIOSGA011652 | XP_006649225.1 phosphatidylserine decarboxylase proenzyme 1, mitochondrial         |
| TCONS_00018596 | -0.906117 | 0.351402    | -0.690559  | BGIOSGA013417 | XP_015692477.1 putative E3 ubiquitin-protein ligase RF298                          |
| TCONS_00019264 | -0.906017 | 0.0391423   | -0.435484  | BGIOSGA003645 | XP_015693233.1 probable manganese-transporting ATPase PDR2                         |
| TCONS_00035214 | -0.905698 | 0.000916764 | 0.332812   | BGIOSGA025868 | XP_006663053.1 transmembrane protein 45A-like                                      |
| TCONS_00026670 | -0.905322 | -0.123546   | -1.54854   | BGIOSGA021382 | XP_003574544.1 uncharacterized protein LOC100835247                                |
| TCONS_00015235 | -0.905304 | -1.72605    | -0.57622   | BGIOSGA017425 | XP_006653090.2 PREDICTED: uncharacterized protein LOC102713267                     |
| TCONS_00007478 | -0.90528  | -1.30943    | 0.105843   | BGIOSGA003430 | XP_006646987.1 pyrophosphate-energized vacuolar membrane proton pump               |
| TCONS_00005353 | -0.90492  | -1.29785    | -1.78877   | BGIOSGA007464 | XP_006646833.1 extracellular matrix-binding protein ebh                            |
| TCONS_00037198 | -0.904895 | -0.0923552  | 1.12516    | BGIOSGA040665 | XP_006664027.1 PREDICTED: uncharacterized protein LOC102720933                     |
| TCONS_00003176 | -0.904666 | -0.906126   | -0.457669  | BGIOSGA015451 | XP_004967353.1 uncharacterized protein LOC101783380                                |
| TCONS_00011193 | -0.904425 | 0.509589    | 0.501365   | BGIOSGA013795 | XP_015690523.1 RNA-binding protein 8A-like isoform X2                              |
| TCONS_00031984 | -0.903984 | -2.35612    | -0.793314  | BGIOSGA018063 | XP_006661686.1 WAT1-related protein At4g08290-like                                 |
| TCONS_00017927 | -0.903787 | -0.772401   | -1.91527   | BGIOSGA019971 | XP_015692905.1 transcription factor ILR3-like                                      |
| TCONS_00011127 | -0.903519 | 0.531301    | 0.0536617  | BGIOSGA025265 | XP_006650730.1 guanylate-binding protein 4-like                                    |
| TCONS_00024421 | -0.9031   | 0.717364    | 0.613526   | BGIOSGA017386 | XP_003561539.1L-type lectin-domain containing receptor kinase I.9                  |
| TCONS_00015192 | -0.902806 | -3.02436    | -1.66986   | BGIOSGA017374 | XP_006653043.1 putative threonine aspartase                                        |
| TCONS_00026084 | -0.902752 | -1.97005    | -1.34947   | #N/A          | #N/A                                                                               |
| TCONS_00038000 | -0.902638 | -1.76846    | -2.10771   | BGIOSGA007923 | XP_006653789.1 putative disease resistance protein RGA4                            |
| TCONS_00031302 | -0.902096 | -1.55476    | -0.893022  | BGIOSGA019760 | XP_015697192.1 desumoylating isopeptidase 1-like isoform X2                        |
| TCONS_00019409 | -0.901415 | -1.27183    | -1.09111   | BGIOSGA034875 | XP_006654489.1 transcription factor DIVARICATA-like                                |
| TCONS_00013921 | -0.901249 | -0.787781   | -0.229863  | #N/A          | #N/A                                                                               |
| TCONS_00024418 | -0.901002 | 0.183908    | -0.0157013 | BGIOSGA016279 | XP_006658183.1 2-oxoglutarate dehydrogenase, mitochondrial-like                    |
| TCONS_00011400 | -0.900914 | -1.28481    | 0.21421    | BGIOSGA011624 | XP_015690822.1 PREDICTED: uncharacterized protein LOC107303929                     |
| TCONS_00005193 | -0.9001   | -1.44716    | -0.634248  | BGIOSGA005774 | XP_015699260.1 soluble inorganic pyrophosphatase 4-like                            |
| TCONS_00025712 | -0.898907 | 0.295985    | 0.208561   | BGIOSGA015085 | NP_001169741.1 uncharacterized LOC100383622                                        |
| TCONS_00032930 | -0.898662 | 0.00642726  | 0.245748   | BGIOSGA007036 | XP_002448955.1 probable calcium-transporting ATPase 9, plasma membrane-type        |
| TCONS_00012263 | -0.898601 | -3.90122    | 0.617796   | BGIOSGA006524 | XP_015689893.1 beta-caryophyllene synthase-like                                    |
| TCONS_00019914 | -0.898268 | -0.9599     | -1.12556   | BGIOSGA003070 | XP_006654877.1 casein kinase I isoform delta-like isoform X1                       |
| TCONS_00009784 | -0.897789 | 0.200106    | -0.997483  | BGIOSGA002794 | XP_006649852.1 PREDICTED: uncharacterized protein LOC102715376                     |
| TCONS_00026986 | -0.897783 | -3.81304    | -1.27272   | BGIOSGA029036 | XP_006659594.1 UBX domain-containing protein 1-like                                |
| TCONS_00026836 | -0.897363 | -0.265135   | -0.209634  | BGIOSGA030854 | XP_015696049.1 dof zinc finger protein MNB1A-like                                  |
| TCONS_00008834 | -0.897315 | -4.0752     | -2.57263   | BGIOSGA025750 | XP_003570606.1 protein EXORDIUM                                                    |
| TCONS_00023770 | -0.897051 | -0.57135    | -0.481797  | BGIOSGA022733 | XP_015695260.1 polyadenylate-binding protein RBP45-like                            |
| TCONS_00008744 | -0.896919 | -3.9535     | -2.81578   | BGIOSGA029490 | XP_010240461.1 uncharacterized protein LOC100838048 isoform X1                     |
| TCONS_00021691 | -0.896408 | -1.07331    | -0.604337  | BGIOSGA011902 | XP_006655833.1 probable receptor-like protein kinase At5g15080 isoform X1          |
| TCONS_00004499 | -0.89621  | 0.0305038   | -0.747142  | BGIOSGA000721 | XP_002458585.2 WVD repeat-containing protein 13                                    |
| TCONS_00013107 | -0.896109 | -0.842076   | -1.24119   | BGIOSGA010316 | XP_006651771.1 PREDICTED: uncharacterized protein LOC102722948                     |
| TCONS_00002699 | -0.896083 | -1.18478    | -0.473962  | BGIOSGA023803 | XP_002455809.1 rust resistance kinase Lr10                                         |
| TCONS_00019955 | -0.895366 | -2.05055    | -1.24629   | BGIOSGA016901 | XP_004964284.1 scarecrow-like protein 6                                            |
| TCONS_00009065 | -0.895042 | -1.18777    | -1.01775   | BGIOSGA013400 | XP_006648146.1 phosphatidylinositol 4-phosphate 5-kinase 9                         |
| TCONS_00029595 | -0.894872 | -0.389791   | -0.831195  | BGIOSGA014766 | XP_003576878.1 polyadenylate-binding protein 2                                     |
| TCONS_00033106 | -0.894563 | -0.91219    | 0.307405   | BGIOSGA009693 | XP_006662789.1 aldehyde dehydrogenase family 3 member H1-like                      |
| TCONS_00003868 | -0.893738 | -0.904143   | -1.88094   | BGIOSGA022838 | NP_001146074.1 submergence induced protein SI397                                   |
| TCONS_00029360 | -0.893649 | 0.178083    | 0.985522   | BGIOSGA031108 | XP_006660856.1 DEAD-box ATP-dependent RNA helicase 7                               |
| TCONS_00007683 | -0.892937 | -0.951325   | 0.34999    | BGIOSGA002978 | XP_006647114.1 phosphoenolpyruvate carboxylase 1                                   |
| TCONS_00033691 | -0.892718 | -1.52799    | -1.01601   | BGIOSGA035466 | XP_021317288.1 uncharacterized protein LOC8062623 isoform X2                       |
| TCONS_00016511 | -0.892134 | 0.484025    | -0.184171  | BGIOSGA024352 | XP_015694619.1 heterogeneous nuclear ribonucleoprotein R-like                      |
| TCONS_00029332 | -0.891479 | 0.685606    | 0.113792   | BGIOSGA013956 | XP_003578418.1 DNA repair RAD52-like protein 2, chloroplastic                      |
| TCONS_00011331 | -0.891111 | -1.30215    | -0.926055  | BGIOSGA013941 | XP_006650893.1 RPM1-interacting protein 4-like                                     |
| TCONS_00019524 | -0.89066  | -1.40741    | -1.78497   | BGIOSGA005545 | XP_024315081.1 probable leucine-rich repeat receptor-like protein kinase At5g49770 |



transcriptome

|                |           |            |            |               |                                                                                                            |
|----------------|-----------|------------|------------|---------------|------------------------------------------------------------------------------------------------------------|
| TCONS_00014510 | -0.890649 | -0.789704  | -1.92099   | BGIOSGA035813 | XP_015689994.1PREDICTED: uncharacterized protein LOC102703201                                              |
| TCONS_00002252 | -0.889885 | -1.23806   | -1.24319   | BGIOSGA004889 | XP_006646517.2 bifunctional aspartate aminotransferase and glutamate/aspartate-prephenate aminotransferase |
| TCONS_00015923 | -0.889702 | -0.204368  | 0.146397   | BGIOSGA015060 | XP_008669391.1acyl-coenzyme A thioesterase 13                                                              |
| TCONS_00018285 | -0.889674 | 0.159905   | -0.0882428 | BGIOSGA020339 | XP_006654760.1 60S ribosomal protein L35a-2                                                                |
| TCONS_00019011 | -0.889464 | -0.65782   | -0.798324  | BGIOSGA015693 | XP_006654243.2PREDICTED: uncharacterized protein LOC102706192, partial                                     |
| TCONS_00012970 | -0.889095 | -0.545712  | 0.022391   | BGIOSGA034003 | XP_022679265.1putative disease resistance RPP13-like protein 1                                             |
| TCONS_00008282 | -0.88904  | -4.05779   | -3.10039   | BGIOSGA000124 | XP_004956139.1lecithin-cholesterol acyltransferase-like 1                                                  |
| TCONS_00030467 | -0.888647 | -3.07388   | 0.325189   | BGIOSGA016911 | XP_004957527.1rho guanine nucleotide exchange factor 1                                                     |
| TCONS_00034043 | -0.888228 | #NA        | -4.26081   | BGIOSGA016659 | NP_0011131192.1retrotransposon protein precursor                                                           |
| TCONS_00023356 | -0.887848 | -0.34488   | -1.43158   | BGIOSGA017579 | XP_006649647.1 tubulin alpha-2 chain                                                                       |
| TCONS_00003843 | -0.887625 | 0.888861   | 0.251681   | BGIOSGA037949 | NP_001168737.1uncharacterized LOC100382529                                                                 |
| TCONS_00005944 | -0.887022 | -0.336252  | -0.389279  | BGIOSGA008078 | XP_006647214.1 motile sperm domain-containing protein 2 isoform X1                                         |
| TCONS_00002093 | -0.88694  | -3.63278   | #NA        | BGIOSGA004721 | XP_019706214.1 heavy metal-associated isoprenylated plant protein 33-like isoform X1                       |
| TCONS_00017843 | -0.886872 | -1.55684   | -2.06065   | BGIOSGA037215 | XP_004962033.1amino acid permease 3                                                                        |
| TCONS_00018306 | -0.886236 | -2.03646   | -1.55351   | BGIOSGA001046 | XP_015693178.1 auxin response factor 15 isoform X2                                                         |
| TCONS_00000334 | -0.885978 | -0.686778  | -0.172052  | BGIOSGA023194 | XP_006643851.1 3'-N-debenzoyl-2'-deoxytaxol N-benzoyltransferase-like                                      |
| TCONS_00014944 | -0.885727 | -0.51303   | -1.6573    | BGIOSGA017127 | XP_006644010.2 dynein light chain 1, cytoplasmic                                                           |
| TCONS_00006954 | -0.885712 | -0.944115  | -1.59493   | BGIOSGA033172 | XP_006648000.1 myosin-15-like                                                                              |
| TCONS_00009920 | -0.885466 | 0.52641    | 0.0709739  | BGIOSGA002350 | XP_006649971.2 DEAD-box ATP-dependent RNA helicase 24                                                      |
| TCONS_00012055 | -0.885295 | -0.0173466 | -1.76797   | BGIOSGA010953 | XP_015690400.1 cytoplasmic phosphatidylinositol transfer protein 1-like isoform X2                         |
| TCONS_00033155 | -0.885285 | -0.930332  | 0.073909   | BGIOSGA006261 | XP_015697591.1 mitogen-activated protein kinase kinase YODA-like                                           |
| TCONS_00013622 | -0.885224 | -0.212996  | 0.250085   | BGIOSGA033864 | XP_003580626.1probable carbohydrate esterase At4g34215                                                     |
| TCONS_00034249 | -0.885079 | #NA        | #NA        | BGIOSGA034543 | XP_019103799.1PREDICTED: uncharacterized protein LOC104889492 isoform X2                                   |
| TCONS_00036515 | -0.884682 | 0.17282    | -2.33169   | BGIOSGA028948 | XP_006664796.1PREDICTED: uncharacterized protein LOC102710366                                              |
| TCONS_00033133 | -0.884654 | -0.768489  | -0.962779  | BGIOSGA014910 | XP_006662801.1 amino acid permease 3-like                                                                  |
| TCONS_00016575 | -0.884637 | -0.943885  | -0.290839  | BGIOSGA014394 | XP_006653742.1 putative DNA ligase 4                                                                       |
| TCONS_00020451 | -0.884326 | 1.19749    | -1.01263   | BGIOSGA017591 | XP_015693822.1 MACPF domain-containing protein At1g14780-like isoform X1                                   |
| TCONS_00026656 | -0.884257 | -2.64587   | -3.52738   | BGIOSGA007420 | XP_015695614.1 probable mannan synthase 11                                                                 |
| TCONS_00001169 | -0.884191 | 0.980829   | 0.472459   | BGIOSGA039766 | XP_002455819.1carbamoyl-phosphate synthase large chain, chloroplastic                                      |
| TCONS_00033724 | -0.884158 | 0.306147   | 0.0426051  | BGIOSGA035498 | XP_006663547.1 putative H/ACA ribonucleoprotein complex subunit 1-like protein 1                           |
| TCONS_00035897 | -0.883822 | 0.308796   | -0.309798  | BGIOSGA021176 | XP_003576639.115-cis-zeta-carotene isomerase, chloroplastic                                                |
| TCONS_00011337 | -0.883645 | -1.03757   | -1.94198   | BGIOSGA005210 | XP_012698059.14-hydroxyphenylacetaldehyde oxime monoxygenase                                               |
| TCONS_00002018 | -0.883402 | -0.828716  | -0.382915  | BGIOSGA036680 | XP_015688330.1 dihydropyrimidinase                                                                         |
| TCONS_00023196 | -0.883265 | 0.682818   | 0.168304   | BGIOSGA025238 | XP_002462003.1uncharacterized protein LOC8061708                                                           |
| TCONS_00033198 | -0.883265 | 0.26778    | -1.8317    | BGIOSGA034254 | XP_021316408.1uncharacterized protein LOC8071576 isoform X1                                                |
| TCONS_00033226 | -0.883259 | -1.10931   | -1.72838   | BGIOSGA031703 | XP_006662847.1 non-lysosomal glucosylceramidase                                                            |
| TCONS_00026271 | -0.882784 | 0.356071   | -2.00882   | BGIOSGA028354 | XP_015696025.1 photosynthetic NDH subunit of subcomplex B 1, chloroplastic                                 |
| TCONS_00035100 | -0.882165 | -0.470338  | -3.7962    | BGIOSGA000177 | XP_006663556.1PREDICTED: uncharacterized protein LOC102705580, partial                                     |
| TCONS_00013385 | -0.882084 | -0.797518  | -0.15785   | BGIOSGA016673 | XP_004981338.1remorin 4.1                                                                                  |
| TCONS_00016748 | -0.881904 | 0.513105   | -0.878454  | BGIOSGA029174 | XP_006652923.1 oryzain alpha chain                                                                         |
| TCONS_00006595 | -0.881509 | -1.22555   | -0.34873   | BGIOSGA008762 | XP_020408903.1rho guanine nucleotide exchange factor isoform X1                                            |
| TCONS_00017859 | -0.881173 | 0.241333   | 0.526917   | BGIOSGA000410 | XP_004961980.1amidophosphoribosyltransferase, chloroplastic                                                |
| TCONS_00008588 | -0.880693 | 0.196336   | -0.945574  | BGIOSGA014504 | XP_006648938.1 scarecrow-like protein 8                                                                    |
| TCONS_00029443 | -0.880555 | -4.92719   | -2.52104   | BGIOSGA029334 | XP_006660929.1 auxin-responsive protein SAUR36-like                                                        |
| TCONS_00029599 | -0.880505 | 0.854105   | 1.17927    | BGIOSGA030221 | XP_006661031.1 PI-PLC X domain-containing protein At5g67130                                                |
| TCONS_00036571 | -0.880155 | -2.808     | -1.67464   | BGIOSGA018902 | XP_006663720.1PREDICTED: uncharacterized protein LOC102720754                                              |
| TCONS_00012988 | -0.879725 | -0.422808  | -1.23779   | BGIOSGA001992 | XP_006650431.1 germin-like protein 3-6                                                                     |
| TCONS_00036838 | -0.879215 | -0.884494  | -0.31494   | #N/A          | #N/A                                                                                                       |
| TCONS_00032389 | -0.878518 | 0.0962799  | -0.16894   | BGIOSGA011828 | XP_006661841.1 60S ribosomal protein L21-2                                                                 |
| TCONS_00002136 | -0.878066 | -1.49568   | -0.207276  | #N/A          | #N/A                                                                                                       |
| TCONS_00026724 | -0.87757  | -0.255877  | -1.30182   | BGIOSGA008273 | XP_022683600.1exocyst complex component EXO70B1                                                            |
| TCONS_00009963 | -0.877186 | 0.586091   | -0.684288  | BGIOSGA034560 | XP_006649997.1 calmodulin                                                                                  |
| TCONS_00011426 | -0.876913 | 0.843336   | 0.399361   | BGIOSGA008836 | XP_015690439.1 40S ribosomal protein S17-like                                                              |
| TCONS_00005610 | -0.876747 | -1.28199   | 0.335964   | BGIOSGA017313 | XP_006648412.2 zinc finger CCHC domain-containing protein 14                                               |
| TCONS_00036082 | -0.87644  | -0.328387  | #NA        | #N/A          | #N/A                                                                                                       |

transcriptome

|                |           |           |           |               |                                                                                                |
|----------------|-----------|-----------|-----------|---------------|------------------------------------------------------------------------------------------------|
| TCONS_00029625 | -0.876229 | -2.12933  | 0.305849  | BGIOSGA002716 | XP_006664800.1PREDICTED: uncharacterized protein LOC102717582                                  |
| TCONS_00036290 | -0.87612  | #NA       | -2.53208  | BGIOSGA037649 | XP_012700358.1uncharacterized protein LOC101786827 isoform X3                                  |
| TCONS_00004627 | -0.875987 | -0.140691 | 0.267711  | BGIOSGA014196 | XP_006644909.2 probable LRR receptor-like serine/threonine-protein kinase At1g06840 isoform X1 |
| TCONS_00017846 | -0.875547 | -0.653722 | -1.55772  | BGIOSGA017544 | XP_006654427.1 bidirectional sugar transporter SWEET1b isoform X1                              |
| TCONS_00022867 | -0.875471 | -2.12625  | -1.36376  | BGIOSGA007499 | XP_015694405.1 squamosa promoter-binding-like protein 12                                       |
| TCONS_00007182 | -0.874775 | -0.612552 | -0.287481 | BGIOSGA015602 | XP_006648197.1 vacuolar amino acid transporter 1-like isoform X2                               |
| TCONS_00004417 | -0.874088 | 0.331445  | 0.0478606 | BGIOSGA000805 | XP_006644726.1PREDICTED: uncharacterized protein At4g18490 isoform X3                          |
| TCONS_00011440 | -0.873942 | -1.47609  | -0.630571 | BGIOSGA035153 | XP_002465995.2trihelix transcription factor GTL1                                               |
| TCONS_00005640 | -0.873564 | -0.161811 | -0.300857 | BGIOSGA029181 | XP_006647052.1 peptidyl-prolyl cis-trans isomerase CYP95 isoform X1                            |
| TCONS_00004160 | -0.873513 | -0.293596 | 0.050676  | BGIOSGA009466 | XP_006646193.1PREDICTED: uncharacterized protein LOC102717671 isoform X2                       |
| TCONS_00032733 | -0.873274 | 0.251633  | #NA       | #N/A          | #N/A                                                                                           |
| TCONS_00008097 | -0.873239 | -2.21744  | -1.5127   | BGIOSGA034211 | XP_006647323.2 heparan-alpha-glucosaminide N-acetyltransferase-like isoform X1                 |
| TCONS_00004185 | -0.872945 | -2.2166   | -2.30075  | BGIOSGA020330 | XP_006646207.1 glutamate synthase 1 [NADH], chloroplastic isoform X1                           |
| TCONS_00029486 | -0.872717 | -0.445206 | -0.218547 | BGIOSGA016952 | XP_015692233.1 DNA-directed RNA polymerase IV subunit 1-like                                   |
| TCONS_00026140 | -0.872313 | -0.15841  | -0.208249 | BGIOSGA035883 | XP_006659944.1 26S proteasome non-ATPase regulatory subunit 1 homolog A-like                   |
| TCONS_00011000 | -0.872289 | -0.472012 | -1.07264  | BGIOSGA004030 | XP_006650627.1 isoflavone 2'-hydroxylase-like                                                  |
| TCONS_00008926 | -0.87221  | -0.351994 | -0.337703 | BGIOSGA020076 | XP_015690933.1 probable NOT transcription complex subunit VIP2 isoform X2                      |
| TCONS_00021352 | -0.872007 | -2.70214  | -1.19722  | BGIOSGA023580 | XP_010227454.1type 2 DNA topoisomerase 6 subunit B-like isoform X1                             |
| TCONS_00028440 | -0.871923 | -0.358245 | -0.386828 | BGIOSGA033906 | XP_006659667.1 acyl carrier protein 3, chloroplastic-like                                      |
| TCONS_00009470 | -0.871883 | -1.12583  | -1.24391  | BGIOSGA027293 | XP_006649529.1 homeobox-leucine zipper protein HOX13-like                                      |
| TCONS_00036272 | -0.871755 | #NA       | 0.724703  | BGIOSGA035740 | XP_004962696.1metallothionein-like protein 4B                                                  |
| TCONS_00014202 | -0.870803 | -1.49739  | -2.01665  | BGIOSGA027798 | XP_004975561.1uncharacterized protein LOC101763320                                             |
| TCONS_00016993 | -0.870645 | -0.924101 | -0.33104  | BGIOSGA000344 | XP_015692770.1 pectin acetyltransferase 5-like                                                 |
| TCONS_00021007 | -0.870584 | -2.7886   | -2.16992  | BGIOSGA009697 | XP_006656225.1 phosphatidylcholine:diacylglycerol cholinephosphotransferase 1-like             |
| TCONS_00014661 | -0.870204 | -0.934687 | -1.02056  | BGIOSGA016826 | XP_006652571.1 O-glucosyltransferase rumi-like isoform X2                                      |
| TCONS_00026486 | -0.869806 | -2.46948  | -1.33311  | BGIOSGA009539 | XP_006659347.2 nucleobase-ascorbate transporter 2-like                                         |
| TCONS_00023636 | -0.869729 | -1.19655  | -1.48531  | BGIOSGA025660 | XP_015690188.1PREDICTED: uncharacterized protein LOC102704689 isoform X2                       |
| TCONS_00022452 | -0.8697   | -1.32968  | -0.530609 | BGIOSGA038041 | XP_006657069.1 ent-kaurene oxidase 2                                                           |
| TCONS_00019942 | -0.869607 | -0.352764 | 0.151358  | BGIOSGA007263 | XP_006655675.2PREDICTED: uncharacterized protein LOC102718557 isoform X1                       |
| TCONS_00008996 | -0.869373 | -1.23658  | -1.05241  | BGIOSGA014738 | XP_004964732.1adenyllyltransferase and sulfurtransferase MOCS3-1                               |
| TCONS_00011496 | -0.86926  | -0.62056  | -0.451226 | BGIOSGA006243 | XP_015691083.1 MLO protein homolog 1                                                           |
| TCONS_00031328 | -0.868979 | -0.466227 | -0.864525 | BGIOSGA003704 | XP_008791558.1 protein ENHANCED DISEASE RESISTANCE 2-like isoform X3                           |
| TCONS_00030192 | -0.868854 | #NA       | 1.13267   | #N/A          | #N/A                                                                                           |
| TCONS_00001210 | -0.868562 | -1.35556  | -1.33618  | BGIOSGA007810 | XP_022682778.1U-box domain-containing protein 35                                               |
| TCONS_00025315 | -0.868551 | -1.35344  | -0.851495 | BGIOSGA024113 | XP_015694460.1 cell number regulator 2                                                         |
| TCONS_00027253 | -0.868401 | 0.796028  | 0.102894  | BGIOSGA025984 | XP_015688778.1 40S ribosomal protein S13-2                                                     |
| TCONS_00027145 | -0.868352 | 0.472828  | -0.245329 | BGIOSGA034819 | XP_006659696.1 40S ribosomal protein S25-4                                                     |
| TCONS_00021871 | -0.868268 | -3.57685  | -1.95151  | BGIOSGA009080 | XP_003564073.1protein EXORDIUM                                                                 |
| TCONS_00017119 | -0.868207 | -1.45102  | -0.319258 | BGIOSGA003571 | XP_006654032.1 LEC14B protein-like                                                             |
| TCONS_00005062 | -0.86811  | 1.09064   | -0.345573 | BGIOSGA000153 | XP_015699149.1 putative disease resistance protein RGA3                                        |
| TCONS_00012269 | -0.867918 | -1.69804  | -1.19363  | BGIOSGA004986 | XP_006651374.1 nuclear pore complex protein NUP93A-like                                        |
| TCONS_00013829 | -0.867482 | 2.56482   | 2.71426   | #N/A          | #N/A                                                                                           |
| TCONS_00030250 | -0.86691  | 0.412901  | 0.0389202 | BGIOSGA007303 | XP_006660762.1 60S ribosomal protein L9                                                        |
| TCONS_00039373 | -0.866146 | #NA       | #NA       | BGIOSGA028277 | XP_014756540.1endo-1,3;1,4-beta-D-glucanase isoform X2                                         |
| TCONS_00030667 | -0.86573  | -0.410117 | -2.44323  | BGIOSGA001826 | XP_015697273.1 putative disease resistance protein RGA4                                        |
| TCONS_00000814 | -0.865638 | -2.2609   | -1.52755  | BGIOSGA019130 | XP_015688277.1 peroxidase 1-like                                                               |
| TCONS_00017310 | -0.865073 | -0.601098 | -1.90746  | BGIOSGA037146 | XP_003568756.1B-box zinc finger protein 22                                                     |
| TCONS_00015290 | -0.865014 | 0.23395   | -0.141005 | BGIOSGA015692 | NP_001344787.1uncharacterized LOC111365147                                                     |
| TCONS_00015769 | -0.864541 | -1.59462  | 0.608742  | BGIOSGA000232 | XP_006652207.1 SNF1-related protein kinase regulatory subunit gamma-1                          |
| TCONS_00022759 | -0.864515 | 0.0307665 | -1.46334  | BGIOSGA020695 | XP_015694194.1PREDICTED: uncharacterized protein LOC102708629 isoform X2                       |
| TCONS_00013727 | -0.864373 | -1.46943  | -1.03546  | BGIOSGA005151 | XP_022684357.1disease resistance protein RGA2 isoform X1                                       |
| TCONS_00024567 | -0.863879 | -2.16733  | -0.5998   | BGIOSGA009777 | XP_006657442.1 probable receptor-like protein kinase At1g30570 isoform X2                      |
| TCONS_00017951 | -0.863861 | -0.414066 | -0.399395 | BGIOSGA028952 | XP_006655385.1PREDICTED: uncharacterized protein LOC102714099                                  |
| TCONS_00032957 | -0.863318 | -0.742763 | 0.0894341 | BGIOSGA033836 | XP_015697555.1 putative NAC domain-containing protein 94                                       |

## transcriptome

|                |           |            |            |               |                                                                                           |
|----------------|-----------|------------|------------|---------------|-------------------------------------------------------------------------------------------|
| TCONS_00003158 | -0.863283 | -0.538448  | -0.910653  | BGIOSGA030049 | XP_006643959.1 putative ubiquitin-conjugating enzyme E2 38 isoform X3                     |
| TCONS_00024332 | -0.863198 | 0.820986   | 0.304865   | BGIOSGA026373 | XP_006658111.1 F-box/kelch-repeat protein SKIP6-like                                      |
| TCONS_00010396 | -0.862953 | 0.0761483  | 0.0507715  | BGIOSGA010420 | XP_004982552.1 uncharacterized protein LOC101773486                                       |
| TCONS_00030872 | -0.862729 | -1.48411   | -2.11761   | BGIOSGA040597 | XP_008785647.1 heavy metal-associated isoprenylated plant protein 3-like                  |
| TCONS_00010365 | -0.862722 | -3.48328   | -2.56681   | BGIOSGA000168 | XP_006651534.1 protein SRG1-like                                                          |
| TCONS_00005355 | -0.862356 | -0.98682   | -0.88319   | BGIOSGA032966 | XP_006659718.1 mitochondrial import receptor subunit TOM9-2-like                          |
| TCONS_00017136 | -0.861526 | -2.70408   | -1.35538   | BGIOSGA027832 | XP_006654994.1 O-glucosyltransferase rumi homolog                                         |
| TCONS_00011640 | -0.861167 | -1.35102   | -0.886076  | #N/A          | #N/A                                                                                      |
| TCONS_00036520 | -0.861112 | -1.37179   | -1.25439   | BGIOSGA009459 | XP_004978420.1 probable LRR receptor-like serine/threonine-protein kinase At1g67720       |
| TCONS_00015647 | -0.860954 | -1.97307   | -1.74291   | BGIOSGA040514 | XP_004961357.1 jacalin-related lectin 19 isoform X2                                       |
| TCONS_00012267 | -0.860204 | -1.31952   | -1.87349   | BGIOSGA031779 | XP_006650078.1 E3 ubiquitin-protein ligase MIEL1 isoform X1                               |
| TCONS_00020314 | -0.860124 | -0.555027  | -0.260226  | BGIOSGA022509 | XP_006655896.2 omega-amidase, chloroplastic-like                                          |
| TCONS_00034467 | -0.860069 | -2.5551    | -1.79088   | BGIOSGA027987 | XP_004978928.1 uncharacterized protein LOC101780233                                       |
| TCONS_00030922 | -0.859818 | -1.64586   | -0.38807   | BGIOSGA032112 | XP_006653400.1 cellulose synthase-like protein H2                                         |
| TCONS_00029377 | -0.859609 | -0.960188  | -2.59667   | BGIOSGA029050 | XP_006660875.1 cytochrome P450 78A9-like                                                  |
| TCONS_00007514 | -0.859454 | -0.311984  | 0.0031188  | BGIOSGA032873 | XP_004951609.2 protein FLX-like 2                                                         |
| TCONS_00019260 | -0.859203 | 1.29277    | -0.178138  | BGIOSGA022835 | XP_003568474.1 uncharacterized protein LOC100841736 isoform X2                            |
| TCONS_00005721 | -0.858715 | -2.75025   | -3.04713   | BGIOSGA035197 | NP_001152657.1 heat shock factor protein 1                                                |
| TCONS_00011785 | -0.858706 | -0.457275  | 0.0802173  | BGIOSGA011220 | XP_008658017.1 retrovirus-related Pol polyprotein LINE-1 isoform X1                       |
| TCONS_00002780 | -0.85843  | 0.47288    | -0.521066  | BGIOSGA016434 | XP_015697597.1 probable serine/threonine-protein kinase At1g18390                         |
| TCONS_00027657 | -0.858359 | -0.233026  | -1.17843   | BGIOSGA027354 | XP_006659250.1 chaperone protein ClpB3, mitochondrial-like                                |
| TCONS_00018104 | -0.858222 | -0.223364  | -0.013123  | BGIOSGA000731 | XP_006654622.2 pseudouridylate synthase 7 homolog                                         |
| TCONS_00016585 | -0.858151 | -0.123376  | 1.47618    | BGIOSGA014382 | XP_006652793.2 probable nucleoredoxin 3                                                   |
| TCONS_00029226 | -0.857866 | -0.795365  | -1.53999   | BGIOSGA021419 | XP_015696749.1 serine/threonine-protein kinase D6PK-like                                  |
| TCONS_00034628 | -0.857827 | -1.35552   | 0.690738   | BGIOSGA034191 | XP_006662916.1 protein FAM136A-like                                                       |
| TCONS_00007147 | -0.857827 | -2.94049   | -0.894224  | #N/A          | #N/A                                                                                      |
| TCONS_00022788 | -0.857827 | 1.05951    | 0.690738   | #N/A          | #N/A                                                                                      |
| TCONS_00034758 | -0.85678  | -0.871475  | 0.103223   | BGIOSGA035414 | XP_015697688.1 transmembrane protein 87B                                                  |
| TCONS_00017000 | -0.85675  | 0.0256977  | -1.79908   | BGIOSGA012828 | XP_008648635.1 cation/H(+) antiporter 20                                                  |
| TCONS_00036527 | -0.855641 | 0.417991   | -0.0888682 | BGIOSGA036800 | XP_006663709.1 mRNA turnover protein 4 homolog                                            |
| TCONS_00019071 | -0.855026 | -1.49726   | -1.61333   | BGIOSGA035186 | XP_015692847.1 adenine/guanine permease AZG1-like                                         |
| TCONS_00031920 | -0.854948 | -1.49974   | -1.60057   | BGIOSGA006364 | XP_002440185.1 probable glucuronosyltransferase Os01g0926600                              |
| TCONS_00037776 | -0.854585 | -0.615763  | -0.684055  | BGIOSGA017425 | XP_006653090.2 PREDICTED: uncharacterized protein LOC102713267                            |
| TCONS_00026567 | -0.85443  | -0.932515  | -0.472781  | BGIOSGA029967 | XP_021321317.1 protein ACCELERATED CELL DEATH 6                                           |
| TCONS_00005633 | -0.854137 | -1.45064   | -0.927542  | BGIOSGA015549 | XP_015688386.1 proteoglycan 4-like                                                        |
| TCONS_00021524 | -0.853973 | -0.721711  | -1.10961   | BGIOSGA022026 | XP_015694190.1 probable transcriptional regulator SLK2                                    |
| TCONS_00011708 | -0.853482 | -1.00236   | -1.00363   | BGIOSGA012779 | XP_006649535.1 calmodulin-binding transcription activator 1-like                          |
| TCONS_00031315 | -0.853378 | 0.578013   | -0.372217  | BGIOSGA014526 | XP_006664819.1 probable methyltransferase PMT3                                            |
| TCONS_00029481 | -0.853031 | -1.45624   | -3.0918    | BGIOSGA022352 | NP_001142968.2 uncharacterized LOC100275421                                               |
| TCONS_00012344 | -0.852939 | -0.0160444 | -1.13996   | BGIOSGA029028 | NP_001152250.1 cationic amino acid transporter                                            |
| TCONS_00027457 | -0.852938 | 1.44292    | -0.280054  | BGIOSGA017449 | XP_006644307.1 chromatin modification-related protein EAF1 B-like isoform X1              |
| TCONS_00019918 | -0.852783 | 0.298624   | -1.75592   | BGIOSGA010344 | XP_006655660.1 PREDICTED: uncharacterized protein LOC102706200                            |
| TCONS_00036326 | -0.852432 | -0.113978  | -0.0968168 | BGIOSGA017012 | XP_015698346.1 protein misato homolog 1                                                   |
| TCONS_00004840 | -0.85239  | -0.501279  | -1.14375   | BGIOSGA000379 | XP_006645131.1 NAD(P)H-quinone oxidoreductase subunit N, chloroplastic                    |
| TCONS_00005036 | -0.852029 | -1.36301   | #N/A       | BGIOSGA006598 | XP_002459042.1 flowering-promoting factor 1-like protein 2                                |
| TCONS_00012293 | -0.851967 | 0.508084   | -0.396199  | BGIOSGA026299 | XP_015690831.1 protein HUA2-LIKE 3-like isoform X2                                        |
| TCONS_00032674 | -0.851626 | -1.76013   | -1.05299   | BGIOSGA017996 | XP_006662041.1 protein NRT1/ PTR FAMILY 6.3-like                                          |
| TCONS_00035145 | -0.851613 | -1.32372   | -1.07935   | BGIOSGA017141 | XP_015698142.1 F-box/kelch-repeat protein SKIP11-like                                     |
| TCONS_00012481 | -0.851157 | -1.36408   | 0.674379   | BGIOSGA010501 | XP_021308267.1 U-box domain-containing protein 57                                         |
| TCONS_00018091 | -0.850984 | 0.547151   | 0.290332   | BGIOSGA020147 | XP_014754606.1 protein RNA-directed DNA methylation 3 isoform X2                          |
| TCONS_00035320 | -0.850488 | -1.66578   | -2.31363   | BGIOSGA005940 | XP_015698129.1 magnesium/proton exchanger 1                                               |
| TCONS_00036858 | -0.850384 | 0.129616   | 0.43871    | BGIOSGA036467 | XP_015698758.1 putative disease resistance protein RGA1                                   |
| TCONS_00020564 | -0.850369 | 0.0442621  | -0.529237  | BGIOSGA023243 | XP_006656035.1 C2 and GRAM domain-containing protein At1g03370                            |
| TCONS_00003181 | -0.85031  | 0.219851   | -1.91265   | BGIOSGA002041 | XP_004967342.1 protein NUCLEAR FUSION DEFECTIVE 6, chloroplastic/mitochondrial isoform X2 |

transcriptome

|                |           |            |            |               |                                                                                                     |
|----------------|-----------|------------|------------|---------------|-----------------------------------------------------------------------------------------------------|
| TCONS_00011776 | -0.850072 | 0.224986   | -0.574748  | BGIOSGA034621 | XP_006649612.2PREDICTED: uncharacterized protein LOC102717136 isoform X2                            |
| TCONS_00037380 | -0.849729 | -2.12778   | -0.785743  | BGIOSGA017818 | XP_006664115.1 myb-related protein MYBAS2 isoform X1                                                |
| TCONS_00002722 | -0.849573 | -3.2992    | -4.22278   | BGIOSGA008108 | XP_004968121.1 uncharacterized protein LOC101780825                                                 |
| TCONS_00030471 | -0.849492 | #NA        | -0.914657  | #N/A          | #N/A                                                                                                |
| TCONS_00022194 | -0.849476 | -0.880495  | -1.39619   | BGIOSGA021478 | XP_006656056.1PREDICTED: uncharacterized protein LOC102711074                                       |
| TCONS_00021491 | -0.84905  | 0.136924   | -0.588928  | BGIOSGA027602 | XP_015694094.1 60S ribosomal protein L13-1-like                                                     |
| TCONS_00015993 | -0.848483 | -2.52594   | -1.489     | BGIOSGA014984 | XP_006652353.1 sugar transport protein 5-like                                                       |
| TCONS_00023568 | -0.847931 | -0.367978  | 0.666467   | #N/A          | #N/A                                                                                                |
| TCONS_00034619 | -0.847631 | -0.332582  | 0.151555   | BGIOSGA032544 | XP_015697425.1 heterogeneous nuclear ribonucleoprotein R-like                                       |
| TCONS_00015230 | -0.847524 | -0.889713  | -1.71376   | BGIOSGA033131 | XP_006653085.1 probable methyltransferase PMT26                                                     |
| TCONS_00021199 | -0.84752  | -1.84235   | 0.448765   | BGIOSGA023418 | XP_015694457.1PREDICTED: uncharacterized protein LOC102722586                                       |
| TCONS_00018463 | -0.847185 | 0.631138   | 0.0796651  | BGIOSGA018972 | XP_015692444.1 methionine S-methyltransferase-like                                                  |
| TCONS_00022156 | -0.847185 | 0.2161     | -0.920335  | BGIOSGA026715 | XP_004965340.160S ribosomal protein L31                                                             |
| TCONS_00016943 | -0.846687 | 0.868446   | -0.607376  | BGIOSGA023101 | XP_017620756.1 putative phospholipid-transporting ATPase 9                                          |
| TCONS_00027922 | -0.846462 | -1.36972   | #NA        | BGIOSGA027097 | XP_015695839.1 protein tesmin/TSO1-like CXC 7                                                       |
| TCONS_00005379 | -0.846206 | -0.244883  | -1.24578   | BGIOSGA007490 | XP_006646866.1 guanine nucleotide-binding protein subunit gamma 2-like                              |
| TCONS_00021945 | -0.846074 | -1.17517   | -0.35478   | BGIOSGA021574 | XP_015694427.1 protein NLR3                                                                         |
| TCONS_00033745 | -0.846014 | -1.04079   | -1.51796   | BGIOSGA035431 | XP_006663011.1 disease resistance protein RPP13-like                                                |
| TCONS_00019058 | -0.845935 | -0.762061  | -1.73218   | BGIOSGA028965 | XP_006654260.1 trans-cinnamate 4-monoxygenase-like                                                  |
| TCONS_00034312 | -0.845564 | 0.867194   | -0.501172  | BGIOSGA034193 | XP_006662734.1 60S ribosomal protein L26-1-like                                                     |
| TCONS_00036963 | -0.845187 | -1.31621   | -0.973802  | BGIOSGA031273 | XP_004968848.1 wall-associated receptor kinase 2                                                    |
| TCONS_00019285 | -0.845144 | -1.15443   | -2.88302   | BGIOSGA020096 | XP_015692890.1 WAT1-related protein At5g07050-like                                                  |
| TCONS_00034455 | -0.845072 | #NA        | 0.88179    | BGIOSGA007792 | XP_022685016.1 uncharacterized protein LOC111258248                                                 |
| TCONS_00002658 | -0.84502  | -1.5086    | 0.484896   | BGIOSGA007226 | XP_015688279.1 charged multivesicular body protein 5-like isoform X2                                |
| TCONS_00031508 | -0.844559 | 0.689456   | -0.916412  | BGIOSGA010153 | XP_002467615.1 probable glutathione S-transferase GSTU6                                             |
| TCONS_00004687 | -0.844405 | #NA        | #NA        | #N/A          | #N/A                                                                                                |
| TCONS_00003113 | -0.844173 | -1.73123   | -0.0322865 | BGIOSGA031504 | XP_015692237.1 jasmonic acid-amido synthetase JAR2-like                                             |
| TCONS_00031569 | -0.844081 | -1.82928   | 2.076      | BGIOSGA024325 | XP_006662562.1 expansin-like A2                                                                     |
| TCONS_00019122 | -0.843974 | -0.223249  | 0.175074   | BGIOSGA026446 | XP_006655221.2 probable AMP deaminase                                                               |
| TCONS_00027921 | -0.843757 | 0.627177   | #NA        | #N/A          | #N/A                                                                                                |
| TCONS_00006766 | -0.843735 | -0.298933  | -0.0979506 | BGIOSGA018983 | XP_006647804.1 protein MEI2-like 2                                                                  |
| TCONS_00003456 | -0.84362  | -1.81754   | -1.70618   | BGIOSGA030088 | XP_021312225.1S-adenosylmethionine synthase 1                                                       |
| TCONS_00024301 | -0.843549 | -1.04418   | -1.11019   | BGIOSGA022793 | XP_006658080.1 sodium/hydrogen exchanger 2                                                          |
| TCONS_00021900 | -0.843544 | -2.61846   | -1.97309   | BGIOSGA009055 | XP_015693515.1 shikimate kinase 2, chloroplastic                                                    |
| TCONS_00018598 | -0.843126 | -1.9585    | -1.19342   | BGIOSGA018836 | XP_015692982.1PREDICTED: uncharacterized protein LOC102710496                                       |
| TCONS_00022580 | -0.842512 | -0.637255  | 0.483126   | BGIOSGA033939 | XP_015698206.1 scarecrow-like protein 3                                                             |
| TCONS_00002701 | -0.842226 | 0.00306535 | -3.18384   | BGIOSGA035756 | XP_006643674.1 glycerophosphodiester phosphodiesterase protein kinase domain-containing GDPDL2-like |
| TCONS_00015215 | -0.842158 | -3.39335   | -2.13102   | BGIOSGA015831 | XP_006653071.1 probable receptor-like protein kinase At1g49730                                      |
| TCONS_00022179 | -0.841915 | 0.362082   | -0.196427  | BGIOSGA006710 | XP_006656046.1PREDICTED: uncharacterized protein LOC102708251                                       |
| TCONS_00004323 | -0.841915 | -1.37488   | 1.38854    | BGIOSGA019401 | XP_015696719.1PREDICTED: uncharacterized protein LOC102722439                                       |
| TCONS_00025022 | -0.841465 | -3.48422   | -1.81926   | BGIOSGA013998 | XP_003563185.1COP1-interacting protein 7                                                            |
| TCONS_00022295 | -0.841459 | -1.96577   | -2.10753   | BGIOSGA019251 | XP_003560049.1 probable indole-3-acetic acid-amido synthetase GH3.7                                 |
| TCONS_00023318 | -0.841389 | -1.37163   | -0.932325  | BGIOSGA028533 | XP_015694869.1PREDICTED: uncharacterized protein LOC102710711                                       |
| TCONS_00009499 | -0.841333 | -1.37553   | -0.934835  | #N/A          | #N/A                                                                                                |
| TCONS_00005111 | -0.841304 | -1.50941   | -1.43227   | BGIOSGA005190 | XP_006645380.1 probable NADPH:quinone oxidoreductase 1                                              |
| TCONS_00010661 | -0.841301 | -1.13484   | -0.924545  | BGIOSGA007803 | XP_002464100.1BOI-related E3 ubiquitin-protein ligase 1                                             |
| TCONS_00000020 | -0.841124 | -1.02205   | -0.942581  | BGIOSGA012308 | XP_006647280.2PREDICTED: uncharacterized protein At1g76660, partial                                 |
| TCONS_00016462 | -0.840759 | -6.57138   | -3.85096   | BGIOSGA014509 | XP_014751254.1ferric reduction oxidase 2                                                            |
| TCONS_00035078 | -0.84061  | 0.0502039  | -0.0735898 | BGIOSGA000738 | XP_015697994.1 ubiquitin carboxyl-terminal hydrolase 12-like                                        |
| TCONS_00000399 | -0.840212 | 1.94518    | -0.93761   | #N/A          | XP_006643893.2 SCAR-like protein 2                                                                  |
| TCONS_00009919 | -0.839673 | 1.71013    | -0.131589  | BGIOSGA012473 | XP_015691275.1 ubiquitin-conjugating enzyme E2 32 isoform X2                                        |
| TCONS_00030717 | -0.839673 | #NA        | #NA        | BGIOSGA032533 | XP_003573732.3putative lipid-transfer protein DIR1                                                  |
| TCONS_00037746 | -0.839673 | -0.377336  | 0.0610564  | BGIOSGA040691 | XP_003560362.2 wall-associated receptor kinase 3                                                    |
| TCONS_00025076 | -0.839147 | 0.20706    | #NA        | #N/A          | #N/A                                                                                                |
| TCONS_00011628 | -0.838933 | -0.250806  | 0.724426   | BGIOSGA034488 | XP_021314174.1IQ domain-containing protein IQM1 isoform X2                                          |

transcriptome

|                |           |             |            |               |                                                                                               |
|----------------|-----------|-------------|------------|---------------|-----------------------------------------------------------------------------------------------|
| TCONS_00023523 | -0.838635 | -1.37845    | 1.05849    | BGIOSGA012449 | XP_014755546.1anaphase-promoting complex subunit 11                                           |
| TCONS_00019152 | -0.838635 | 0.791474    | 0.643451   | BGIOSGA018201 | XP_002440974.1mitochondrial zinc maintenance protein 1, mitochondrial                         |
| TCONS_00016500 | -0.838635 | #NA         | -1.94151   | BGIOSGA028771 | XP_006653710.1 lateral signaling target protein 2 homolog                                     |
| TCONS_00008658 | -0.838428 | -2.15352    | -0.0842862 | BGIOSGA031008 | XP_006647763.1 transcription factor bHLH63-like                                               |
| TCONS_00009312 | -0.838312 | -1.72617    | -0.497489  | BGIOSGA011852 | XP_002456220.1uncharacterized protein LOC8059153 isoform X1                                   |
| TCONS_00013644 | -0.837961 | -0.573284   | 1.31539    | BGIOSGA015796 | XP_015692155.1 pyruvate dehydrogenase E1 component subunit alpha-3, chloroplatic              |
| TCONS_00010469 | -0.837647 | 0.620505    | -0.943946  | #N/A          | #N/A                                                                                          |
| TCONS_00012588 | -0.837245 | -0.390409   | -2.89394   | BGIOSGA010386 | XP_006650265.1 potassium transporter 27                                                       |
| TCONS_00004229 | -0.837173 | #NA         | #NA        | BGIOSGA036432 | XP_004967389.2uncharacterized protein LOC101762180                                            |
| TCONS_00010213 | -0.837173 | -1.37999    | #NA        | #N/A          | #N/A                                                                                          |
| TCONS_00021357 | -0.837151 | -1.38435    | -0.463663  | BGIOSGA023059 | XP_006656476.1 arogenate dehydrogenase 2, chloroplatic-like                                   |
| TCONS_00020044 | -0.837101 | 0.717857    | 0.323796   | BGIOSGA035300 | XP_006656591.1 nucleolar protein 10                                                           |
| TCONS_00011485 | -0.836711 | -2.96544    | #NA        | BGIOSGA011541 | XP_014752791.1uncharacterized protein LOC100835806                                            |
| TCONS_00020078 | -0.836711 | -1.38048    | 0.0537405  | BGIOSGA019020 | XP_015693955.1 auxin-induced protein 15A-like                                                 |
| TCONS_00032778 | -0.836486 | -0.525008   | -0.598848  | BGIOSGA009411 | XP_015697348.1 inactive poly [ADP-ribose] polymerase RCD1                                     |
| TCONS_00027064 | -0.836263 | 1.4264      | #NA        | BGIOSGA025845 | XP_004974082.1traB domain-containing protein                                                  |
| TCONS_00014667 | -0.836263 | -1.38095    | #NA        | #N/A          | #N/A                                                                                          |
| TCONS_00001318 | -0.835404 | -0.464322   | -0.419007  | BGIOSGA003952 | XP_006644348.1PREDICTED: uncharacterized protein LOC102704370                                 |
| TCONS_00001995 | -0.835404 | -0.38186    | #NA        | BGIOSGA004629 | XP_006644855.1 E3 ubiquitin-protein ligase RING1-like                                         |
| TCONS_00019403 | -0.835367 | 0.800808    | 0.140865   | BGIOSGA007612 | XP_002441194.2uncharacterized protein LOC8061745                                              |
| TCONS_00013800 | -0.835212 | -1.02084    | -0.700635  | BGIOSGA004215 | XP_006662117.1PREDICTED: uncharacterized protein LOC102704180                                 |
| TCONS_00001964 | -0.83505  | 0.0905336   | -0.891405  | BGIOSGA030974 | XP_008674940.2subtilisin-like protease SBT3.5                                                 |
| TCONS_00028876 | -0.835008 | -0.548134   | -0.941816  | BGIOSGA008993 | XP_003576467.1probable trehalose-phosphate phosphatase 7                                      |
| TCONS_00020070 | -0.83499  | -2.3823     | 0.0494435  | BGIOSGA007405 | XP_004983138.1uncharacterized protein At4g22758                                               |
| TCONS_00011177 | -0.83499  | 1.11247     | 1.67747    | #N/A          | #N/A                                                                                          |
| TCONS_00011944 | -0.8348   | -2.21431    | -1.89338   | BGIOSGA001814 | XP_006649783.1 protein FAF-like, chloroplatic                                                 |
| TCONS_00007874 | -0.834586 | 1.20224     | -0.951567  | BGIOSGA011322 | XP_020202243.1plasma membrane ATPase 3-like                                                   |
| TCONS_00018243 | -0.834453 | -1.18961    | -0.571382  | BGIOSGA007471 | XP_015693208.1 phosphatidylinositol/phosphatidylcholine transfer protein SFH8-like isoform X4 |
| TCONS_00001490 | -0.834239 | -1.75701    | -0.773282  | BGIOSGA020396 | XP_006644451.1 CTP synthase-like                                                              |
| TCONS_00019944 | -0.834191 | -0.383143   | #NA        | BGIOSGA003441 | XP_015693976.1 zinc finger protein CONSTANS-LIKE 12-like                                      |
| TCONS_00009604 | -0.834071 | -0.530804   | 0.0127873  | BGIOSGA000304 | XP_006649660.1 two-component response regulator ORR21                                         |
| TCONS_00018223 | -0.833806 | -1.38355    | -0.953515  | BGIOSGA017651 | XP_010239928.1uncharacterized protein LOC100835989                                            |
| TCONS_00003386 | -0.83343  | #NA         | #NA        | BGIOSGA030848 | XP_004983817.1uncharacterized protein LOC101782683                                            |
| TCONS_00010463 | -0.83343  | 0.715589    | 0.145081   | #N/A          | #N/A                                                                                          |
| TCONS_00016882 | -0.833068 | -1.86286    | -1.59854   | BGIOSGA014081 | XP_006653035.1 tetraspanin-19                                                                 |
| TCONS_00019847 | -0.833065 | #NA         | #NA        | BGIOSGA014538 | XP_006647666.1 amino acid transporter ANTL1-like                                              |
| TCONS_00001373 | -0.832978 | -0.476206   | -0.650096  | BGIOSGA021125 | XP_006644374.2 DEAD-box ATP-dependent RNA helicase 26                                         |
| TCONS_00008976 | -0.832709 | #NA         | #NA        | BGIOSGA009223 | XP_008780610.1PREDICTED: uncharacterized protein Os02g0798400-like                            |
| TCONS_00025133 | -0.832362 | 0.199875    | -0.957149  | BGIOSGA024272 | XP_014752362.2protein FAR1-RELATED SEQUENCE 5 isoform X3                                      |
| TCONS_00029204 | -0.832362 | #NA         | #NA        | BGIOSGA026772 | XP_006660734.1 EG45-like domain containing protein                                            |
| TCONS_00011421 | -0.832362 | -2.23308    | -1.31972   | BGIOSGA033398 | XP_006649242.1 arsenate reductase 2.2                                                         |
| TCONS_00013415 | -0.832308 | 0.689032    | 0.201789   | BGIOSGA037765 | XP_003561529.3uncharacterized protein LOC100837842 isoform X1                                 |
| TCONS_00025461 | -0.832283 | -0.00457375 | -0.294579  | BGIOSGA028363 | XP_015694710.1 formin-like protein 5                                                          |
| TCONS_00037363 | -0.832249 | 0.0147317   | 0.0917652  | BGIOSGA036007 | XP_015698422.1 eukaryotic translation initiation factor 5B                                    |
| TCONS_00002736 | -0.832236 | -2.25705    | -2.25149   | BGIOSGA002072 | XP_006643706.1 Bowman-Birk type bran trypsin inhibitor-like                                   |
| TCONS_00030602 | -0.832023 | -1.38545    | 1.04199    | BGIOSGA018470 | XP_015692744.1 F-box protein At5g46170-like                                                   |
| TCONS_00033369 | -0.832023 | -0.537455   | 0.179497   | #N/A          | #N/A                                                                                          |
| TCONS_00005153 | -0.831988 | -0.89322    | -0.748921  | BGIOSGA000051 | XP_015692546.1 coiled-coil domain-containing protein R3HCC1L                                  |
| TCONS_00005340 | -0.831905 | -2.87605    | -0.488903  | BGIOSGA036419 | XP_015689336.1 transcription factor HBP-1a-like isoform X1                                    |
| TCONS_00034217 | -0.831609 | -2.8596     | -2.99043   | BGIOSGA030934 | XP_006663775.2 protein DETOXIFICATION 21-like isoform X1                                      |
| TCONS_00009368 | -0.83151  | -3.99137    | -0.653806  | BGIOSGA003234 | XP_002468461.1uncharacterized protein LOC8059848                                              |
| TCONS_00019249 | -0.83137  | -2.55608    | 0.598327   | BGIOSGA018099 | XP_006654367.1 cyclin-P3-1                                                                    |
| TCONS_00008601 | -0.83137  | -0.649191   | -0.544631  | #N/A          | #N/A                                                                                          |
| TCONS_00005979 | -0.831177 | -1.4807     | -1.07845   | BGIOSGA008112 | XP_006665082.1 transcription factor bHLH121-like isoform X1                                   |
| TCONS_00005625 | -0.830868 | -1.6666     | -1.07358   | BGIOSGA005713 | XP_015688804.1 ADP-ribosylation factor GTPase-activating protein AGD12-like                   |
| TCONS_00024034 | -0.830748 | -0.216907   | 0.286672   | BGIOSGA029883 | XP_006664931.1 glyoxylate/hydroxypyruvate reductase HPR3-like                                 |

transcriptome

|                |           |            |            |               |                                                                                 |
|----------------|-----------|------------|------------|---------------|---------------------------------------------------------------------------------|
| TCONS_00037111 | -0.830748 | -1.1238    | -0.113259  | BGIOSGA031394 | XP_004957941.1probable histone H2A.1                                            |
| TCONS_00032984 | -0.830446 | -0.480267  | -1.15467   | BGIOSGA029239 | XP_006659696.1 40S ribosomal protein S25-4                                      |
| TCONS_00009128 | -0.830446 | -2.09765   | -2.54699   | BGIOSGA035703 | XP_006649226.1 DNA-directed RNA polymerases II, IV and V subunit 9A-like        |
| TCONS_00004004 | -0.829956 | -0.729222  | -1.7952    | BGIOSGA023020 | XP_006646115.1PREDICTED: uncharacterized protein LOC102715261                   |
| TCONS_00010061 | -0.82962  | -0.358904  | -1.15938   | BGIOSGA010090 | XP_015690277.1 40S ribosomal protein S21                                        |
| TCONS_00029797 | -0.829578 | -0.873523  | -2.77158   | BGIOSGA012549 | XP_006650025.1 zinc finger CCCH domain-containing protein 22                    |
| TCONS_00020245 | -0.829556 | -0.735162  | -0.123311  | BGIOSGA022433 | XP_015694123.1 ABC transporter C family member 13                               |
| TCONS_00006694 | -0.828569 | 0.284731   | -0.126924  | BGIOSGA008890 | XP_006648956.2 ATPase family AAA domain-containing protein 3-B-like             |
| TCONS_00031031 | -0.828298 | -2.07824   | -2.4202    | BGIOSGA032847 | XP_014661364.1uncharacterized protein LOC101785497                              |
| TCONS_00019514 | -0.828285 | -0.689513  | -0.758992  | BGIOSGA012556 | XP_006654555.1 2,3-bisphosphoglycerate-independent phosphoglycerate mutase-like |
| TCONS_00028241 | -0.828225 | -1.1803    | -0.0950098 | BGIOSGA006399 | XP_003572341.2WPP domain-interacting protein 1                                  |
| TCONS_00036025 | -0.828182 | -2.67936   | -1.527     | BGIOSGA030133 | XP_015698718.1 serine/threonine-protein kinase D6PKL1-like                      |
| TCONS_00030883 | -0.82753  | -3.09942   | -3.77734   | BGIOSGA021484 | XP_006665050.1 flavonoid 3'-monooxygenase                                       |
| TCONS_00003041 | -0.827522 | -0.493434  | -0.154978  | BGIOSGA006828 | XP_006643882.2 aquaporin NIP1-2-like                                            |
| TCONS_00001654 | -0.827522 | 0.609659   | 0.352506   | #N/A          | #N/A                                                                            |
| TCONS_00021951 | -0.82729  | 0.931329   | 0.351915   | BGIOSGA026961 | XP_002436775.2U-box domain-containing protein 39                                |
| TCONS_00020637 | -0.82729  | -0.3906    | #N/A       | BGIOSGA027641 | XP_004965358.1uncharacterized protein LOC101756485                              |
| TCONS_00029089 | -0.827063 | 0.194109   | -0.311629  | BGIOSGA004530 | XP_020404094.1copper transporter 5.1                                            |
| TCONS_00024896 | -0.82699  | -1.12078   | -0.641673  | BGIOSGA004969 | XP_006657600.1 putative metallophosphoesterase At3g03305 isoform X1             |
| TCONS_00024835 | -0.826655 | -1.24912   | 0.32038    | BGIOSGA007905 | XP_015694799.1 probable polygalacturonase                                       |
| TCONS_00020549 | -0.826623 | #N/A       | #N/A       | BGIOSGA025435 | XP_002468294.1UDP-glucose flavonoid 3-O-glucosyltransferase 7                   |
| TCONS_00036264 | -0.826474 | -1.28718   | -2.15167   | BGIOSGA035731 | XP_004962706.1osmotin-like protein                                              |
| TCONS_00011860 | -0.825791 | -0.54429   | -0.421285  | BGIOSGA018443 | XP_006651204.1PREDICTED: uncharacterized protein LOC102715561                   |
| TCONS_00014675 | -0.825675 | -0.306559  | -0.868854  | BGIOSGA008714 | XP_015692212.1 GATA transcription factor 5-like                                 |
| TCONS_00001636 | -0.825593 | #N/A       | -0.974327  | BGIOSGA019837 | XP_003569627.1membrane protein PM19L                                            |
| TCONS_00014413 | -0.825398 | #N/A       | 0.688147   | BGIOSGA007446 | XP_006652389.1 MLP-like protein 423                                             |
| TCONS_00000089 | -0.825237 | 0.133211   | -0.264719  | BGIOSGA016925 | XP_006665126.1PREDICTED: uncharacterized protein LOC102715819                   |
| TCONS_00019439 | -0.824658 | -0.879003  | 0.122846   | BGIOSGA004769 | XP_006654515.1 50S ribosomal protein L17-like                                   |
| TCONS_00000523 | -0.824482 | #N/A       | #N/A       | BGIOSGA016473 | XP_006643970.1 CASP-like protein 1C1-1                                          |
| TCONS_00033597 | -0.82414  | 1.66472    | -2.56297   | BGIOSGA019486 | XP_002464185.1selenoprotein H                                                   |
| TCONS_00011424 | -0.823812 | -0.0726318 | 0.343089   | BGIOSGA015010 | XP_002466011.1uncharacterized protein LOC8078025                                |
| TCONS_00018351 | -0.823495 | 0.0904951  | -2.30157   | #N/A          | #N/A                                                                            |
| TCONS_00012441 | -0.823367 | -0.151921  | 0.00420052 | BGIOSGA031746 | XP_015690456.1 zinc transporter 2-like                                          |
| TCONS_00006023 | -0.822833 | -2.3569    | -0.797242  | BGIOSGA030697 | XP_003536688.1ubiquitin receptor RAD23c                                         |
| TCONS_00006143 | -0.82261  | -2.39598   | #N/A       | BGIOSGA029245 | XP_004974189.1uncharacterized protein LOC101772750                              |
| TCONS_00018260 | -0.822471 | -1.65918   | -0.567208  | BGIOSGA005018 | XP_024315680.1uncharacterized protein LOC100838382                              |
| TCONS_00008852 | -0.822471 | #N/A       | 1.60272    | BGIOSGA028839 | XP_006647953.1PREDICTED: uncharacterized protein LOC102720304                   |
| TCONS_00001310 | -0.821812 | -2.9819    | -0.983917  | BGIOSGA003110 | XP_002455911.1uncharacterized protein LOC8082509                                |
| TCONS_00008986 | -0.821687 | -0.66012   | -2.5692    | BGIOSGA013021 | XP_006650279.1 cyclin-B1-2                                                      |
| TCONS_00035755 | -0.821687 | 1.82531    | 0.752732   | #N/A          | #N/A                                                                            |
| TCONS_00003993 | -0.821564 | -0.275245  | -0.824081  | BGIOSGA001200 | XP_020400600.1uncharacterized protein LOC103631680 isoform X1                   |
| TCONS_00023545 | -0.821564 | -1.07531   | -1.98455   | #N/A          | #N/A                                                                            |
| TCONS_00037408 | -0.821327 | -1.7557    | -1.376     | BGIOSGA035958 | XP_006664130.1PREDICTED: uncharacterized protein LOC102705124                   |
| TCONS_00026824 | -0.820645 | -4.20571   | -0.624296  | BGIOSGA003805 | XP_015695843.1PREDICTED: uncharacterized protein LOC102718014                   |
| TCONS_00003850 | -0.820433 | -2.39861   | -0.615432  | BGIOSGA026208 | XP_003569243.1NDR1/HIN1-like protein 13                                         |
| TCONS_00020987 | -0.820329 | -3.9837    | #N/A       | BGIOSGA002288 | XP_006657109.2 transcription factor HY5                                         |
| TCONS_00017520 | -0.820227 | 0.338102   | -1.57288   | BGIOSGA010742 | XP_006652182.1 (+)-germacrene D synthase-like                                   |
| TCONS_00028500 | -0.81974  | 0.237965   | -0.351717  | BGIOSGA026457 | XP_006659720.1 RNA-binding protein 42-like isoform X2                           |
| TCONS_00012362 | -0.81974  | -0.524996  | -1.57411   | BGIOSGA037627 | XP_004984201.2uncharacterized protein LOC101757961                              |
| TCONS_00023936 | -0.819571 | -0.361023  | -0.0104558 | BGIOSGA037843 | XP_015695270.1 zinc finger CCCH domain-containing protein 50                    |
| TCONS_00000289 | -0.819319 | -0.912355  | -2.20434   | BGIOSGA033119 | XP_006645543.1 phosphoenolpyruvate/phosphate translocator 3, chloroplastic-like |
| TCONS_00001742 | -0.819287 | -1.13699   | -3.31222   | BGIOSGA000895 | XP_006644647.1 CASP-like protein 3A1                                            |
| TCONS_00037025 | -0.819287 | 0.0405461  | 0.450286   | BGIOSGA014856 | XP_006652425.1 mitochondrial inner membrane protease ATP23                      |
| TCONS_00005733 | -0.819115 | 0.921687   | -0.99072   | #N/A          | #N/A                                                                            |
| TCONS_00020418 | -0.818867 | -0.178159  | 0.00865216 | BGIOSGA022603 | NP_001146539.1nucleic acid binding protein                                      |
| TCONS_00011906 | -0.818827 | -1.30307   | -2.16895   | BGIOSGA032230 | XP_006649748.1PREDICTED: uncharacterized protein LOC102709156                   |
| TCONS_00022414 | -0.81855  | 0.599053   | -1.57711   | BGIOSGA002188 | XP_002438556.2uncharacterized protein LOC8076704                                |
| TCONS_00014718 | -0.818251 | #N/A       | -1.9929    | BGIOSGA016892 | XP_006652616.1 cyclin-P2-1                                                      |
| TCONS_00036405 | -0.818251 | 0.335643   | 0.229494   | BGIOSGA037773 | XP_006664731.1 WD repeat-containing protein 75                                  |

transcriptome

|                |           |            |            |               |                                                                                                  |
|----------------|-----------|------------|------------|---------------|--------------------------------------------------------------------------------------------------|
| TCONS_00019246 | -0.818178 | -3.45727   | -3.04893   | BGIOSGA004804 | XP_006654363.1PREDICTED: uncharacterized protein LOC102717800                                    |
| TCONS_00016447 | -0.818177 | -2.45766   | -1.6083    | BGIOSGA004975 | XP_015691546.1 protein IQ-DOMAIN 14-like                                                         |
| TCONS_00028119 | -0.818107 | #NA        | 0.229131   | BGIOSGA007378 | XP_006659476.2 germin-like protein 8-13<br>XP_006654148.2 shaggy-related protein kinase eta-like |
| TCONS_00018810 | -0.818107 | 0.335462   | -1.99326   | BGIOSGA031595 | XP_006644491.1 ras-related protein RABA1f                                                        |
| TCONS_00001540 | -0.817763 | -0.32271   | -0.0294591 | BGIOSGA023494 | XP_004985498.1germin-like protein 3-1                                                            |
| TCONS_00009426 | -0.817697 | -1.08009   | -1.40933   | BGIOSGA005180 | XP_006657694.1 serine carboxypeptidase-like                                                      |
| TCONS_00038972 | -0.817503 | #NA        | -0.994779  | BGIOSGA038135 | XP_015691206.1 T-complex protein 1 subunit beta                                                  |
| TCONS_00010523 | -0.817378 | 2.04236    | 0.294413   | BGIOSGA020338 | XP_006647829.1 sodium-coupled neutral amino acid transporter 1 isoform X2                        |
| TCONS_00029066 | -0.817256 | #NA        | #NA        | BGIOSGA000566 | XP_006655890.1PREDICTED: uncharacterized protein LOC102709653                                    |
| TCONS_00020301 | -0.817136 | -0.495837  | -0.995699  | BGIOSGA014480 | XP_004962706.1osmotin-like protein                                                               |
| TCONS_00036263 | -0.817136 | -1.40273   | -1.58066   | BGIOSGA023474 | XP_006663758.2PREDICTED: uncharacterized protein LOC102708666                                    |
| TCONS_00034186 | -0.817078 | 0.552804   | -1.28535   | BGIOSGA022298 | NP_001147782.1cyclopropane fatty acid synthase                                                   |
| TCONS_00023654 | -0.817058 | -1.00387   | -0.449719  | BGIOSGA019408 | XP_006644068.1 eukaryotic translation initiation factor 6-2-like                                 |
| TCONS_00003328 | -0.81702  | -1.81791   | -2.99599   | BGIOSGA026234 | XP_015696185.1PREDICTED: uncharacterized protein LOC107303388                                    |
| TCONS_00027112 | -0.816906 | #NA        | -2.99628   | BGIOSGA034849 | XP_021312803.1protein PIN-LIKES 6                                                                |
| TCONS_00002061 | -0.81679  | 0.0495443  | -0.542756  | BGIOSGA017849 | XP_015691698.1 MAD5-box transcription factor 31-like isoform X1                                  |
| TCONS_00014928 | -0.816686 | -1.59594   | -0.826903  | BGIOSGA022872 | XP_006648142.1 putative transporter arsB                                                         |
| TCONS_00007129 | -0.815973 | -1.25152   | -1.11157   | BGIOSGA005130 | XP_006662567.1 xyloglucan endotransglucosylase/hydrolase protein 31-like                         |
| TCONS_00031582 | -0.81581  | -3.40441   | -0.999019  | BGIOSGA007965 | XP_021313026.1splicing factor U2af small subunit B                                               |
| TCONS_00004138 | -0.81568  | -1.40457   | 1.00066    | BGIOSGA008319 | XP_006644531.1 protein prenyltransferase alpha subunit repeat-containing protein 1-B             |
| TCONS_00001585 | -0.815595 | -0.925512  | -0.584519  | BGIOSGA004218 | #N/A                                                                                             |
| TCONS_00016565 | -0.815512 | -1.40478   | -0.718582  | #N/A          | #N/A                                                                                             |
| TCONS_00009694 | -0.815431 | -4.46378   | 1.48546    | #N/A          | #N/A                                                                                             |
| TCONS_00012784 | -0.815391 | -1.66797   | -0.777674  | BGIOSGA006938 | XP_004982353.1F-box/LRR-repeat protein At3g48880                                                 |
| TCONS_00006217 | -0.815196 | 0.764741   | 0.699888   | BGIOSGA029120 | XP_003575090.1protein MKS1                                                                       |
| TCONS_00031316 | -0.815121 | -1.89071   | -2.22313   | BGIOSGA024987 | XP_006664818.1 protein CUP-SHAPED COTYLEDON 1-like                                               |
| TCONS_00019301 | -0.815011 | 0.842509   | -2.00101   | BGIOSGA028630 | XP_012700131.1LOB domain-containing protein 6                                                    |
| TCONS_00001994 | -0.814869 | -0.668632  | -2.00137   | BGIOSGA004630 | XP_006644855.1 E3 ubiquitin-protein ligase RING1-like                                            |
| TCONS_00027686 | -0.8148   | -1.82072   | 0.168386   | BGIOSGA034994 | XP_015695553.1PREDICTED: uncharacterized protein LOC102703056                                    |
| TCONS_00009631 | -0.814601 | -1.05801   | -1.00204   | BGIOSGA026955 | XP_004985119.1homeobox-leucine zipper protein HOX19 isoform X2                                   |
| TCONS_00032379 | -0.814601 | -1.40594   | -2.00204   | BGIOSGA028620 | XP_006661838.1 hypersensitive-induced response protein 1-like                                    |
| TCONS_00010796 | -0.81458  | 0.140169   | -0.0127793 | BGIOSGA011897 | XP_006650473.1 DELLA protein SLR1                                                                |
| TCONS_00009156 | -0.814536 | -1.92059   | 0.260837   | BGIOSGA028985 | XP_021302193.1cell division control protein 2 homolog                                            |
| TCONS_00004803 | -0.814463 | -0.676682  | -0.297203  | BGIOSGA000412 | XP_003564737.13-phosphoinositide-dependent protein kinase 2                                      |
| TCONS_00002177 | -0.814232 | 1.82626    | 1.13455    | BGIOSGA004813 | XP_015699226.1 fructokinase-like 1, chloroplastic                                                |
| TCONS_00024296 | -0.814145 | -2.40651   | 1.69727    | BGIOSGA035354 | XP_002463347.1momilactone A synthase                                                             |
| TCONS_00003896 | -0.814033 | -0.111197  | -2.14095   | BGIOSGA030592 | XP_006644319.2 hypersensitive-induced response protein 1-like                                    |
| TCONS_00029171 | -0.81382  | -3.40692   | -2.00398   | BGIOSGA019134 | XP_003578245.12-hydroxyisoflavanone dehydratase                                                  |
| TCONS_00025947 | -0.813795 | 0.429547   | 0.580919   | BGIOSGA028023 | XP_006659147.1 dnaJ homolog subfamily C member 2                                                 |
| TCONS_00000913 | -0.813601 | -0.82839   | -0.543212  | BGIOSGA019732 | XP_015699241.1 40S ribosomal protein S4-like isoform X3                                          |
| TCONS_00034093 | -0.813525 | -3.05937   | -0.820289  | BGIOSGA012244 | XP_006663127.1PREDICTED: uncharacterized protein LOC102702225                                    |
| TCONS_00031481 | -0.813502 | -0.489786  | -1.36734   | BGIOSGA016943 | XP_008659873.1RHOMBOID-like protein 2                                                            |
| TCONS_00002500 | -0.813502 | 0.293116   | 1.7367     | BGIOSGA017363 | XP_006645312.2 glucan endo-1,3-beta-glucosidase, acidic isoform-like                             |
| TCONS_00025713 | -0.813455 | -0.0405999 | -2.93089   | BGIOSGA014615 | XP_006658134.1 WRKY transcription factor SUSIBA2-like                                            |
| TCONS_00013712 | -0.813213 | -1.89311   | -0.642919  | BGIOSGA032160 | XP_004975056.3zinc finger protein ZAT5-like                                                      |
| TCONS_00018534 | -0.81315  | -0.085839  | -0.83572   | BGIOSGA006747 | XP_015693246.1PREDICTED: uncharacterized protein LOC102700143                                    |
| TCONS_00012695 | -0.813089 | -0.0859165 | -0.783405  | BGIOSGA023984 | XP_006651592.2PREDICTED: uncharacterized protein LOC102711962                                    |
| TCONS_00032973 | -0.813068 | -1.40787   | -0.59081   | BGIOSGA019723 | NP_001105567.1root cap periphery gene 2 precursor                                                |
| TCONS_00011976 | -0.812893 | -0.789182  | -0.491711  | BGIOSGA004796 | XP_015691139.1 probable mannose-1-phosphate guanylyltransferase 1                                |
| TCONS_00031042 | -0.812893 | -0.408091  | -0.491711  | BGIOSGA034002 | XP_015697750.1 putative disease resistance protein RGA4                                          |
| TCONS_00031473 | -0.812782 | 0.106342   | 0.709647   | BGIOSGA019185 | XP_022681533.1uncharacterized protein LOC101778128 isoform X2                                    |
| TCONS_00008939 | -0.812745 | 0.430442   | 0.559698   | BGIOSGA009705 | XP_003570262.1mitogen-activated protein kinase kinase 5                                          |
| TCONS_00023894 | -0.812745 | -0.145243  | -0.328577  | BGIOSGA024312 | XP_002460844.1uncharacterized protein LOC8081736 isoform X1                                      |
| TCONS_00028415 | -0.812675 | 0.0322066  | -0.0700185 | BGIOSGA029420 | XP_006659652.1 transcription factor PCF2                                                         |
| TCONS_00010207 | -0.812657 | -0.408388  | -2.42191   | BGIOSGA036770 | XP_003561584.1 probable trehalose-phosphate phosphatase 9                                        |

transcriptome

|                |           |            |           |               |                                                                                            |
|----------------|-----------|------------|-----------|---------------|--------------------------------------------------------------------------------------------|
| TCONS_00016701 | -0.812347 | -2.06086   | -4.46707  | BGIOSGA014262 | XP_019710597.1 transcription termination factor MTERF6, chloroplast/mitochondrial-like     |
| TCONS_00009270 | -0.812332 | -0.176851  | -0.527049 | BGIOSGA006899 | XP_015690852.1 probable protein phosphatase 2C 28                                          |
| TCONS_00009070 | -0.812332 | -1.55564   | -1.87441  | BGIOSGA027894 | XP_006648153.1 AT-hook motif nuclear-localized protein 9-like                              |
| TCONS_00021545 | -0.812316 | -5.40882   | -2.00771  | BGIOSGA031062 | XP_006655752.1 NAC domain-containing protein 43-like                                       |
| TCONS_00020050 | -0.812271 | -0.224449  | 0.682491  | BGIOSGA006092 | XP_006656659.2 GDSL esterase/lipase At5g45910-like                                         |
| TCONS_00017540 | -0.81203  | -1.82421   | -4.00842  | BGIOSGA037494 | XP_006655193.2 putative mannan endo-1,4-beta-mannosidase 5                                 |
| TCONS_00004829 | -0.811787 | 0.0869432  | -2.49445  | BGIOSGA025756 | XP_006645122.1 protein trichome birefringence-like 7                                       |
| TCONS_00037284 | -0.811635 | -0.599335  | -1.21103  | BGIOSGA036091 | XP_006664066.1 guanylate kinase 1                                                          |
| TCONS_00010544 | -0.811613 | 0.442741   | 0.280052  | BGIOSGA012439 | XP_004968836.1 pentatricopeptide repeat-containing protein At5g66500, mitochondrial        |
| TCONS_00002309 | -0.811558 | 0.327194   | 0.520923  | BGIOSGA022297 | XP_015695832.1 NAC transcription factor ONAC010                                            |
| TCONS_00001188 | -0.811558 | 1.53364    | -0.388103 | BGIOSGA035894 | XP_010231939.1 putative transcription factor bHLH041                                       |
| TCONS_00022440 | -0.811536 | -1.23987   | 1.03475   | BGIOSGA021021 | XP_006656171.1 cysteine synthase-like                                                      |
| TCONS_00007537 | -0.811493 | 0.360666   | 0.0320695 | BGIOSGA006946 | XP_006648423.1 ultraviolet-B receptor UVR8                                                 |
| TCONS_00001590 | -0.811483 | -0.35924   | -3.81713  | BGIOSGA035541 | XP_021312281.1 limonoid UDP-glucosyltransferase                                            |
| TCONS_00026805 | -0.81135  | -0.410032  | 0.463827  | BGIOSGA032055 | XP_015695729.1 probable glucan 1,3-beta-glucosidase A                                      |
| TCONS_00017174 | -0.811264 | -0.0762402 | 0.305586  | BGIOSGA027666 | XP_006644248.1 PREDICTED: uncharacterized protein LOC102721967 isoform X1                  |
| TCONS_00023731 | -0.811217 | -2.4102    | -2.5954   | BGIOSGA032130 | XP_015698251.1 anthocyanidin 3-O-glucosyltransferase 2-like                                |
| TCONS_00002605 | -0.811199 | 0.17474    | 0.989522  | BGIOSGA000858 | XP_006645346.2 ABC transporter D family member 1-like                                      |
| TCONS_00005390 | -0.811199 | -1.62703   | -1.43674  | BGIOSGA029776 | XP_004951929.1 aspartate--tRNA ligase 2, cytoplasmic                                       |
| TCONS_00011113 | -0.81119  | 2.0492     | -1.81786  | BGIOSGA012138 | XP_006650710.1 glucan endo-1,3-beta-glucosidase 8-like                                     |
| TCONS_00015078 | -0.811127 | -1.41031   | 0.512907  | BGIOSGA033111 | XP_014750974.1 ubiquitin thioesterase otubain-like isoform X2                              |
| TCONS_00031451 | -0.811105 | -3.21776   | -2.49627  | BGIOSGA028809 | XP_003574177.1 cytochrome P450 89A2                                                        |
| TCONS_00031827 | -0.810984 | -5.93405   | -2.72722  | BGIOSGA032747 | XP_015691385.1 cytochrome P450 76C1-like                                                   |
| TCONS_00009137 | -0.810896 | 0.699022   | -0.451798 | BGIOSGA008764 | XP_006650951.2 scarecrow-like protein 6                                                    |
| TCONS_00034216 | -0.810866 | -4.87007   | -4.47073  | BGIOSGA030934 | XP_006663775.2 protein DETOXIFICATION 21-like isoform X1                                   |
| TCONS_00004472 | -0.810727 | -0.734705  | -0.557926 | BGIOSGA034468 | XP_004970093.2 lysosomal Pro-X carboxypeptidase                                            |
| TCONS_00026074 | -0.81072  | -0.437296  | 0.149494  | BGIOSGA034333 | XP_002445194.1 putative F-box/LRR-repeat protein At5g41840 isoform X1                      |
| TCONS_00006786 | -0.810474 | -2.27989   | -2.40459  | BGIOSGA033446 | XP_006647820.1 protein kinase G11A-like                                                    |
| TCONS_00006042 | -0.81022  | 0.116928   | -0.543408 | BGIOSGA017591 | XP_006647301.1 MACPF domain-containing protein At1g14780-like                              |
| TCONS_00014990 | -0.810166 | 0.147908   | -1.4536   | BGIOSGA007922 | XP_006653789.1 putative disease resistance protein RGA4                                    |
| TCONS_00028816 | -0.810156 | 0.0447888  | 0.160666  | BGIOSGA028608 | XP_004956634.1 proton pump-interactor BIP103                                               |
| TCONS_00002889 | -0.810151 | -0.919685  | -0.883781 | BGIOSGA002324 | XP_006645526.1 DEAD-box ATP-dependent RNA helicase 18                                      |
| TCONS_00037143 | -0.810146 | -2.41154   | -0.691148 | BGIOSGA024901 | XP_006650657.1 PREDICTED: uncharacterized protein LOC102714997                             |
| TCONS_00015310 | -0.810027 | -1.06377   | -0.88784  | BGIOSGA012264 | XP_010228842.2 dynamin-related protein 4C                                                  |
| TCONS_00005604 | -0.809966 | 1.83616    | 0.334404  | BGIOSGA023433 | XP_006648408.2 protein LYK5                                                                |
| TCONS_00001607 | -0.809937 | -2.28627   | -2.15109  | BGIOSGA021705 | XP_003567011.1 LEAF RUST 10 DISEASE-RESISTANCE LOCUS RECEPTOR-LIKE PROTEIN KINASE-like 2.5 |
| TCONS_00002714 | -0.809929 | -0.836314  | -0.276646 | BGIOSGA002521 | XP_015699285.1 probable receptor-like protein kinase At1g67000                             |
| TCONS_00017026 | -0.809925 | -0.685996  | -0.906706 | BGIOSGA018135 | XP_004960311.1 ABC transporter G family member 16                                          |
| TCONS_00033351 | -0.80979  | -1.34786   | -0.666031 | BGIOSGA035179 | XP_004979200.1 probable pre-mRNA-splicing factor ATP-dependent RNA helicase DEAH4          |
| TCONS_00011994 | -0.809678 | #NA        | -3.6923   | BGIOSGA004808 | XP_015691244.1 laccase-10                                                                  |
| TCONS_00016114 | -0.809636 | -1.9442    | -0.133749 | BGIOSGA010051 | XP_003581361.1 probable galactinol--sucrose galactosyltransferase 2                        |
| TCONS_00015435 | -0.809558 | 0.909647   | -1.01452  | BGIOSGA015262 | XP_004975176.1 G-type lectin S-receptor-like serine/threonine-protein kinase LECRK4        |
| TCONS_00036241 | -0.809549 | -1.18367   | 0.24484   | BGIOSGA020820 | XP_003579150.1 rhodanese-like domain-containing protein 6 isoform X4                       |
| TCONS_00030394 | -0.809526 | 1.16717    | -0.889074 | BGIOSGA031527 | XP_015696802.1 homeobox-leucine zipper protein ROC6-like                                   |
| TCONS_00019768 | -0.809362 | -0.0205206 | -0.95742  | BGIOSGA017588 | XP_015692915.1 probable ubiquitin-conjugating enzyme E2 24 isoform X1                      |
| TCONS_00035215 | -0.809299 | 0.51598    | 1.64694   | BGIOSGA033611 | XP_015697721.1 glycine-rich domain-containing protein 1-like                               |
| TCONS_00009005 | -0.809204 | 0.392926   | -0.734587 | BGIOSGA005402 | XP_006648078.1 clathrin interactor EPSIN 2                                                 |
| TCONS_00022952 | -0.809155 | -1.17033   | -0.621854 | BGIOSGA033796 | XP_006655356.1 ABC transporter G family member 28-like                                     |
| TCONS_00026933 | -0.808772 | -2.46988   | -1.32114  | BGIOSGA028735 | XP_006660274.1 psbP domain-containing protein 3, chloroplast                               |
| TCONS_00004284 | -0.808404 | -1.1824    | -0.518555 | BGIOSGA009390 | XP_015697975.1 myosin-17-like isoform X2                                                   |
| TCONS_00035242 | -0.807794 | -0.575077  | -0.486448 | BGIOSGA009211 | XP_015697726.1 splicing factor U2af large subunit A                                        |
| TCONS_00005001 | -0.80764  | 0.0892643  | -1.24028  | BGIOSGA031229 | XP_006645262.1 probable serine/threonine-protein kinase At1g54610 isoform X1               |
| TCONS_00033202 | -0.807514 | -1.99047   | -1.02448  | BGIOSGA035037 | XP_006662833.1 disease resistance protein RPM1-like                                        |
| TCONS_00006223 | -0.806928 | -1.55113   | 0.419245  | BGIOSGA010557 | XP_015689218.1 serine decarboxylase 1                                                      |



transcriptome

|                |           |            |             |               |                                                                                     |
|----------------|-----------|------------|-------------|---------------|-------------------------------------------------------------------------------------|
| TCONS_00005547 | -0.804843 | -1.0573    | -0.590345   | #N/A          | XP_008460445.1 FGGY carbohydrate kinase domain-containing protein                   |
| TCONS_00028840 | -0.804344 | -0.669494  | -0.561266   | BGIOSGA036737 | XP_006661159.1 probable receptor-like protein kinase At5g15080                      |
| TCONS_00029334 | -0.804044 | -0.43454   | 0.66471     | BGIOSGA031082 | XP_015696421.1 U11/U12 small nuclear ribonucleoprotein 35 kDa protein               |
| TCONS_00023345 | -0.803977 | -1.09617   | -1.63268    | BGIOSGA025386 | XP_015694561.1 mediator of RNA polymerase II transcription subunit 33A-like         |
| TCONS_00014689 | -0.80376  | 0.27752    | 0.494079    | BGIOSGA004029 | XP_006653630.1 leiomodlin-2-like                                                    |
| TCONS_00011905 | -0.803679 | -0.231347  | -1.01026    | BGIOSGA034638 | XP_006649746.1 PREDICTED: uncharacterized protein LOC102708596                      |
| TCONS_00014923 | -0.803585 | 0.156925   | -0.455302   | BGIOSGA027460 | XP_006450366.140S ribosomal protein S11                                             |
| TCONS_00028874 | -0.802798 | 0.512201   | 0.10122     | BGIOSGA032849 | XP_006660575.1 ethylene-responsive transcription factor RAP2-13                     |
| TCONS_00029266 | -0.802777 | -0.874823  | -0.801253   | BGIOSGA031014 | XP_006660769.2 PREDICTED: uncharacterized protein LOC102710811                      |
| TCONS_00032167 | -0.802706 | -1.63835   | -0.268658   | BGIOSGA007941 | XP_006644747.1 glutelin type-A 1                                                    |
| TCONS_00008618 | -0.802117 | 0.242868   | 0.0879694   | BGIOSGA006963 | NP_001183696.1 PLATZ transcription factor                                           |
| TCONS_00016618 | -0.801967 | -1.66054   | 0.16233     | BGIOSGA025878 | XP_015692044.1 probable LRR receptor-like serine/threonine-protein kinase At1g56140 |
| TCONS_00020190 | -0.801803 | -0.913932  | -0.327204   | BGIOSGA022381 | XP_006655827.1 PT11-like tyrosine-protein kinase At3g15890 isoform X1               |
| TCONS_00002821 | -0.801099 | 1.56337    | 0.156767    | #N/A          | XP_013442996.1 senescence-associated protein                                        |
| TCONS_00032498 | -0.800727 | 0.03661    | -0.191113   | BGIOSGA031619 | XP_006661904.2 DNA-directed RNA polymerase I subunit 2 isoform X1                   |
| TCONS_00000472 | -0.799572 | -1.19545   | -1.18836    | BGIOSGA016437 | XP_015699180.1 proline-rich receptor-like protein kinase PERK1                      |
| TCONS_00014503 | -0.799251 | -0.500881  | -0.934296   | BGIOSGA023261 | XP_006653556.1 DNA-directed RNA polymerase III subunit 1                            |
| TCONS_00031838 | -0.799245 | -2.98426   | -3.17004    | BGIOSGA012214 | XP_004970732.1 protein NRT1/ PTR FAMILY 5.16                                        |
| TCONS_00037090 | -0.799155 | -2.01798   | -0.720922   | BGIOSGA010891 | XP_015698667.1 beta-galactosidase 15 isoform X2                                     |
| TCONS_00005857 | -0.798712 | 0.335481   | 0.198428    | BGIOSGA003522 | XP_006647174.1 muscle M-line assembly protein unc-89-like isoform X1                |
| TCONS_00007150 | -0.798619 | -0.386813  | -0.697094   | BGIOSGA035748 | XP_006648160.2 sucrose transport protein SUT4 isoform X2                            |
| TCONS_00035686 | -0.798086 | -0.208617  | -1.41582    | BGIOSGA037104 | XP_015698451.1 histone deacetylase 14 isoform X3                                    |
| TCONS_00010042 | -0.79776  | 0.00815909 | -0.562166   | BGIOSGA012593 | XP_006650059.1 spidroin-2                                                           |
| TCONS_00012710 | -0.79726  | -1.44427   | -0.00340521 | BGIOSGA012076 | XP_006650278.1 BTB/POZ domain-containing protein NPY4-like isoform X2               |
| TCONS_00014273 | -0.796957 | -0.12518   | -0.413242   | BGIOSGA013898 | XP_006653403.1 nicotinate phosphoribosyltransferase 2-like isoform X2               |
| TCONS_00031852 | -0.796838 | 0.117176   | 0.0701722   | BGIOSGA034201 | XP_015697425.1 heterogeneous nuclear ribonucleoprotein R-like                       |
| TCONS_00032308 | -0.795517 | 0.184415   | -0.0582969  | BGIOSGA033266 | XP_015697399.1 probable inorganic phosphate transporter 1-8                         |
| TCONS_00022356 | -0.795478 | -4.59603   | -2.19623    | BGIOSGA032386 | XP_006658218.1 flavin-containing monooxygenase FMO GS-OX-like 9                     |
| TCONS_00014750 | -0.795429 | -0.311676  | -0.985319   | BGIOSGA008782 | XP_006653679.1 HMG1/2-like protein                                                  |
| TCONS_00008579 | -0.79517  | -0.295738  | 0.171906    | BGIOSGA025984 | XP_015688778.1 40S ribosomal protein S13-2                                          |
| TCONS_00032301 | -0.795102 | -1.09779   | -1.78003    | BGIOSGA023394 | XP_015697003.1 probable receptor-like protein kinase At3g55450                      |
| TCONS_00011289 | -0.79438  | 0.705191   | -0.874593   | BGIOSGA020449 | NP_001150798.1 harpin-induced protein                                               |
| TCONS_00022732 | -0.792567 | -0.504225  | -1.21266    | BGIOSGA005499 | XP_015694354.1 probable allantoinase deiminase isoform X2                           |
| TCONS_00035253 | -0.792008 | -1.07192   | 0.0994931   | BGIOSGA033654 | XP_006663071.1 armadillo repeat-containing protein 8                                |
| TCONS_00008797 | -0.791153 | -2.92668   | -0.274111   | BGIOSGA011757 | XP_004953880.1auxin efflux carrier component 1a                                     |
| TCONS_00019546 | -0.79095  | -1.32074   | 1.45828     | BGIOSGA017812 | XP_006655437.2 SNF1-related protein kinase regulatory subunit beta-1-like           |
| TCONS_00004443 | -0.790944 | -0.225793  | 0.14688     | BGIOSGA006708 | XP_015689950.1 protein tesmin/TSO1-like CXC 5                                       |
| TCONS_00034694 | -0.790733 | -2.74452   | -1.96623    | BGIOSGA021652 | XP_015689597.1 F-box protein FBW2-like                                              |
| TCONS_00005949 | -0.790031 | -2.84655   | -3.22337    | BGIOSGA001230 | XP_004954858.2mitogen-activated protein kinase kinase kinase 18                     |
| TCONS_00036590 | -0.78983  | 0.139661   | -0.088429   | BGIOSGA034584 | XP_003577865.140S ribosomal protein S16                                             |
| TCONS_00010090 | -0.789762 | -2.01696   | -0.295363   | BGIOSGA005872 | XP_002467852.1U4/U6 small nuclear ribonucleoprotein PRP4-like protein               |
| TCONS_00028622 | -0.789469 | -0.306833  | -0.170556   | BGIOSGA007345 | XP_006660465.2 beta-fructofuranosidase, insoluble isoenzyme 7-like                  |
| TCONS_00002194 | -0.789396 | -1.37958   | -1.67932    | BGIOSGA017953 | NP_001152198.1starch binding domain containing protein                              |
| TCONS_00030608 | -0.789298 | -1.44848   | -0.720961   | BGIOSGA032433 | NP_001148246.1NAD(P)H-dependent oxidoreductase                                      |
| TCONS_00037004 | -0.789136 | -1.13992   | -0.527525   | BGIOSGA033568 | XP_015698266.1 putative disease resistance RPP13-like protein 3                     |
| TCONS_00014727 | -0.788872 | 0.236738   | -0.555358   | BGIOSGA008764 | XP_002446917.1scarecrow-like protein 6                                              |
| TCONS_00037409 | -0.788729 | -2.18522   | -0.884194   | BGIOSGA029048 | XP_015698401.1 probable inactive purple acid phosphatase 1                          |
| TCONS_00031559 | -0.788351 | -1.11328   | -1.043      | BGIOSGA034009 | XP_004983796.1monosaccharide-sensing protein 2                                      |
| TCONS_00009162 | -0.787127 | 0.10244    | -0.779902   | BGIOSGA037013 | XP_006649250.2 PREDICTED: uncharacterized protein LOC102706362                      |
| TCONS_00006281 | -0.786564 | -0.971905  | -0.605664   | BGIOSGA012442 | XP_006647388.1 calmodulin-binding protein 60 D-like isoform X1                      |
| TCONS_00026174 | -0.786456 | -3.92075   | -2.38308    | BGIOSGA019835 | XP_014756540.1endo-1,3;1,4-beta-D-glucanase isoform X2                              |
| TCONS_00005328 | -0.785835 | -3.43351   | -0.977574   | BGIOSGA007436 | XP_006646821.1 PREDICTED: uncharacterized protein LOC102716930                      |
| TCONS_00012914 | -0.785607 | -3.39707   | -1.51907    | BGIOSGA001873 | XP_006650400.1 CSC1-like protein RXW8 isoform X2                                    |

## transcriptome

|                |           |            |             |               |                                                                                                               |
|----------------|-----------|------------|-------------|---------------|---------------------------------------------------------------------------------------------------------------|
| TCONS_00021025 | -0.785416 | -4.04796   | -3.49652    | BGIOSGA022041 | XP_003563633.1aspartyl protease family protein At5g10770                                                      |
| TCONS_00018679 | -0.78532  | -1.25937   | -0.492869   | BGIOSGA028598 | XP_015693299.1 acyl-coenzyme A oxidase 4, peroxisomal-like                                                    |
| TCONS_00026800 | -0.784743 | -0.101557  | -0.240175   | BGIOSGA003815 | XP_006659506.1 14-3-3-like protein GF14-A                                                                     |
| TCONS_00005953 | -0.784588 | -0.621072  | 0.332595    | BGIOSGA008090 | NP_001150485.2senescence-associated protein XP_010231260.1serine/threonine-protein kinase STN8, chloroplastic |
| TCONS_00018007 | -0.784461 | 0.984074   | -0.763925   | BGIOSGA026954 | XP_006650340.1 beclin-1-like protein                                                                          |
| TCONS_00010591 | -0.784242 | 0.605183   | -0.432359   | BGIOSGA015291 | XP_006646640.1 coiled-coil domain-containing protein SCD2                                                     |
| TCONS_00005013 | -0.783909 | -0.277532  | 0.584176    | BGIOSGA000205 | XP_006645596.1 regulatory protein NPR1                                                                        |
| TCONS_00003010 | -0.78374  | 0.606555   | 0.0574509   | BGIOSGA002207 | XP_004968601.1cationic amino acid transporter 5                                                               |
| TCONS_00003073 | -0.783633 | 0.0904886  | -2.54104    | BGIOSGA035843 | XP_006647186.2 CLP protease regulatory subunit CLPX1, mitochondrial                                           |
| TCONS_00007825 | -0.783104 | -0.784395  | 0.205394    | BGIOSGA000363 | XP_010239737.1probable protein transport Sec1a                                                                |
| TCONS_00015509 | -0.783104 | -0.306668  | -0.0973247  | BGIOSGA021985 | XP_006646498.1PREDICTED: uncharacterized protein LOC102721231                                                 |
| TCONS_00002211 | -0.782887 | -1.22989   | -1.32455    | BGIOSGA004845 | XP_006657844.2PREDICTED: uncharacterized protein LOC102704159 isoform X1                                      |
| TCONS_00014924 | -0.782398 | -1.10017   | -0.228641   | BGIOSGA038236 | XP_006663522.2 putative disease resistance RPP13-like protein 3                                               |
| TCONS_00033646 | -0.782305 | -0.931107  | -1.5337     | BGIOSGA024454 | XP_006657748.1 glucan endo-1,3-beta-glucosidase 1-like                                                        |
| TCONS_00023745 | -0.781999 | -0.29708   | 0.0471038   | BGIOSGA012138 | XP_006649290.1PREDICTED: uncharacterized protein LOC102718154                                                 |
| TCONS_00011462 | -0.781898 | -3.3785    | -2.44694    | BGIOSGA033641 | XP_006649595.1PREDICTED: uncharacterized protein LOC102712511                                                 |
| TCONS_00011759 | -0.78177  | -3.60615   | -1.14719    | BGIOSGA025045 | XP_021301510.160S ribosomal protein L8                                                                        |
| TCONS_00036256 | -0.781209 | 0.425202   | -0.368272   | BGIOSGA037612 | XP_006659181.1 G-type lectin S-receptor-like serine/threonine-protein kinase B120 isoform X2                  |
| TCONS_00026020 | -0.781033 | -5.50038   | -2.78132    | BGIOSGA020093 | XP_015693323.1 probable calcium-binding protein CML22                                                         |
| TCONS_00018625 | -0.780791 | -1.98746   | -1.11072    | BGIOSGA018809 | XP_015688599.1 UDP-glycosyltransferase 85A2-like                                                              |
| TCONS_00006082 | -0.780789 | -1.66718   | -1.44968    | BGIOSGA031102 | XP_006649287.1 callose synthase 9                                                                             |
| TCONS_00009203 | -0.780754 | -0.933764  | -0.782478   | BGIOSGA001492 | XP_006644114.1 myb-related protein P-like                                                                     |
| TCONS_00000747 | -0.780706 | -3.83312   | -1.62276    | BGIOSGA025705 | XP_006664169.1 protein WRKY1                                                                                  |
| TCONS_00037465 | -0.780604 | 0.291281   | -0.296007   | BGIOSGA013733 | NP_001150903.2surfeit locus protein 5                                                                         |
| TCONS_00028192 | -0.780496 | -0.876026  | -0.954246   | BGIOSGA003217 | XP_006664358.1PREDICTED: uncharacterized protein LOC102707638                                                 |
| TCONS_00036732 | -0.780154 | 0.412064   | -0.446515   | BGIOSGA036583 | XP_006651762.1PREDICTED: uncharacterized protein LOC102720419 isoform X1                                      |
| TCONS_00013327 | -0.780128 | -1.81381   | -0.977193   | BGIOSGA027730 | XP_015688143.1 UBP1-associated protein 2C-like                                                                |
| TCONS_00003978 | -0.779284 | 0.785923   | 0.000980655 | BGIOSGA001936 | XP_006649656.1 glutamine synthetase cytosolic isozyme 1-2                                                     |
| TCONS_00011814 | -0.779182 | -0.442559  | -1.64313    | BGIOSGA009926 | XP_004951287.1zinc finger CCCH domain-containing protein 15                                                   |
| TCONS_00005891 | -0.778879 | 0.893516   | 0.544923    | BGIOSGA017759 | XP_015697831.1 probable ubiquitin-like-specific protease 2B                                                   |
| TCONS_00034528 | -0.778855 | -0.305294  | -0.661589   | BGIOSGA034291 | XP_006647708.1 protein PHOTOPERIOD-INDEPENDENT EARLY FLOWERING 1                                              |
| TCONS_00008614 | -0.778824 | -0.380193  | -0.736233   | BGIOSGA018822 | XP_015694346.1 amino acid permease 3-like isoform X1                                                          |
| TCONS_00020873 | -0.778805 | -0.0558383 | -0.977989   | BGIOSGA001201 | XP_006646651.1 glutathione S-transferase 3                                                                    |
| TCONS_00005038 | -0.778508 | -0.32359   | -1.0759     | BGIOSGA019178 | XP_006661734.1 pumilio homolog 23                                                                             |
| TCONS_00032130 | -0.778448 | -0.208027  | 0.538523    | BGIOSGA032006 | XP_015696416.1 double-stranded RNA-binding protein 5-like                                                     |
| TCONS_00029319 | -0.778204 | -3.76555   | -1.36365    | BGIOSGA027394 | XP_002466438.1dentin sialophosphoprotein                                                                      |
| TCONS_00010975 | -0.778047 | -1.01871   | -0.842023   | BGIOSGA035305 | XP_015697354.1 putative pentatricopeptide repeat-containing protein At1g17630                                 |
| TCONS_00003020 | -0.777646 | -0.478125  | -0.184951   | BGIOSGA018330 | XP_006650891.1 B-cell receptor-associated protein 31-like                                                     |
| TCONS_00013536 | -0.777609 | -1.44314   | -1.12218    | BGIOSGA008080 | XP_003564169.1F-box protein At4g00755                                                                         |
| TCONS_00011388 | -0.777323 | -1.44486   | -1.01405    | BGIOSGA027358 | XP_006653973.1 soluble inorganic pyrophosphatase 4-like                                                       |
| TCONS_00018495 | -0.777188 | -1.28321   | -1.95332    | BGIOSGA036338 | XP_006664797.1 sucrose transport protein SUT2                                                                 |
| TCONS_00037618 | -0.776426 | -0.888072  | -1.44659    | BGIOSGA014093 | XP_006644701.1 VQ motif-containing protein 4-like                                                             |
| TCONS_00004387 | -0.775897 | 0.110671   | -0.306709   | BGIOSGA018746 | XP_006649715.1 probable protein kinase                                                                        |
| TCONS_00011873 | -0.775735 | -1.4077    | -1.74879    | BGIOSGA029386 | At2g41970                                                                                                     |
| TCONS_00013371 | -0.77565  | 0.535022   | 0.0562995   | BGIOSGA027932 | XP_004981378.1hydroxyproline O-galactosyltransferase GALT6                                                    |
| TCONS_00033734 | -0.775274 | -0.337318  | 0.13187     | BGIOSGA035486 | XP_002448574.2putative F-box protein At2g33200                                                                |
| TCONS_00030769 | -0.77516  | -0.899781  | -0.552071   | BGIOSGA003728 | XP_006661651.1 disease resistance protein RPM1-like                                                           |
| TCONS_00028389 | -0.775157 | -1.242     | -0.484867   | BGIOSGA026574 | XP_006659639.2 ubiquitin thioesterase otubain-like                                                            |
| TCONS_00031231 | -0.775035 | -0.0188877 | -0.36717    | BGIOSGA033049 | XP_004986535.1AT-rich interactive domain-containing protein 1                                                 |
| TCONS_00002574 | -0.774958 | 1.09049    | 0.655968    | BGIOSGA005217 | XP_006646704.2 serine/arginine-rich splicing factor SR45-like                                                 |
| TCONS_00000041 | -0.774652 | -0.769138  | -1.0819     | BGIOSGA002610 | XP_006648166.1PREDICTED: uncharacterized protein LOC102709903                                                 |
| TCONS_00005975 | -0.773978 | -1.23707   | -0.049668   | BGIOSGA007479 | XP_004952341.1uncharacterized protein LOC101783666 isoform X3                                                 |
| TCONS_00012530 | -0.773643 | 0.856962   | 0.379071    | BGIOSGA026044 | XP_006651529.2 mitotic checkpoint protein BUB3.1-like                                                         |
| TCONS_00004769 | -0.773488 | -0.643549  | -1.1317     | BGIOSGA000446 | XP_006645062.1 protein ABHD11                                                                                 |
| TCONS_00007109 | -0.773428 | -0.877491  | -0.735442   | BGIOSGA009136 | XP_006648114.1 myosin-8-like                                                                                  |

## transcriptome

|                |           |            |            |               |                                                                                                |
|----------------|-----------|------------|------------|---------------|------------------------------------------------------------------------------------------------|
| TCONS_00007166 | -0.773369 | -0.50578   | -0.445503  | BGIOSGA022076 | XP_006648179.1 callose synthase 3-like                                                         |
| TCONS_00022768 | -0.773072 | -0.922624  | -1.88956   | BGIOSGA025476 | XP_006656371.1 metal transporter Nramp3                                                        |
| TCONS_00025103 | -0.772883 | -1.01302   | -0.610435  | BGIOSGA024298 | XP_006658564.1 protein RFT1 homolog                                                            |
| TCONS_00007215 | -0.77247  | -0.828298  | -1.39151   | BGIOSGA032300 | XP_015688800.1 diphosphomevalonate decarboxylase MVD1-like                                     |
| TCONS_00017050 | -0.772093 | -0.577769  | -0.598366  | BGIOSGA013090 | XP_015693017.1 tetraspanin-6 isoform X4                                                        |
| TCONS_00004942 | -0.772086 | -0.370553  | 0.0870702  | BGIOSGA002198 | XP_015690720.1 DEAD-box ATP-dependent RNA helicase 30                                          |
| TCONS_00010871 | -0.772045 | -1.27822   | -1.07603   | BGIOSGA025398 | XP_021321458.1 tubulin alpha-1 chain                                                           |
| TCONS_00019344 | -0.77197  | -0.762642  | 0.270058   | BGIOSGA019650 | XP_006654435.1 patellin-3-like                                                                 |
| TCONS_00032567 | -0.771923 | -1.47131   | -2.59482   | BGIOSGA003944 | XP_004982603.1 methionine gamma-lyase                                                          |
| TCONS_00023091 | -0.77154  | -1.4254    | -0.919375  | BGIOSGA036206 | XP_006657433.2 probable UDP-arabinose 4-epimerase 1                                            |
| TCONS_00018472 | -0.771207 | -2.21676   | -1.43771   | BGIOSGA018963 | XP_014755776.1 putative F-box/LRR-repeat protein At5g02700                                     |
| TCONS_00018041 | -0.771123 | 0.781508   | 0.102002   | BGIOSGA001903 | XP_006654572.1 60S ribosomal protein L30-like                                                  |
| TCONS_00006804 | -0.77061  | -1.04661   | -0.623294  | BGIOSGA005122 | XP_015689328.1 potassium transporter 25 isoform X1                                             |
| TCONS_00023862 | -0.770575 | -1.29155   | -1.23283   | BGIOSGA000803 | XP_006657803.1 beta-amylase                                                                    |
| TCONS_00004662 | -0.770268 | -0.809677  | -0.916701  | BGIOSGA003285 | XP_003564530.12-oxoglutarate-dependent dioxygenase DAO                                         |
| TCONS_00004828 | -0.770149 | -1.95505   | -1.14077   | BGIOSGA005479 | XP_006645121.1 probable pectinesterase/pectinesterase inhibitor 51                             |
| TCONS_00019397 | -0.769804 | -0.732566  | 0.165193   | BGIOSGA003012 | XP_00665367.2PREDICTED: uncharacterized protein LOC102707966                                   |
| TCONS_00019890 | -0.769606 | -1.20483   | 0.0220302  | BGIOSGA030241 | XP_004977990.1UPF0481 protein At3g47200                                                        |
| TCONS_00037436 | -0.768921 | 0.546378   | 1.21387    | BGIOSGA022315 | XP_006664698.2PREDICTED: uncharacterized protein LOC102701782, partial                         |
| TCONS_00003374 | -0.768901 | -4.22741   | -2.04285   | BGIOSGA012710 | XP_006644090.1 peroxidase 2-like                                                               |
| TCONS_00025807 | -0.768763 | -1.39837   | -0.778668  | BGIOSGA018725 | XP_006659056.1 fructokinase-2                                                                  |
| TCONS_00010015 | -0.76883  | 1.217      | -0.115577  | BGIOSGA004699 | XP_024313564.1protein ENHANCED DISEASE RESISTANCE 4                                            |
| TCONS_00014514 | -0.76802  | 0.151312   | -0.693543  | BGIOSGA024790 | XP_020393134.1inverted formin-2-like isoform X1                                                |
| TCONS_00012315 | -0.768015 | -1.20683   | -0.4113    | BGIOSGA026245 | XP_015691174.1 stomatal closure-related actin-binding protein 1-like                           |
| TCONS_00032758 | -0.76789  | -2.28599   | -3.95849   | BGIOSGA011300 | XP_006662096.1 mitochondrial carnitine/acylcarnitine carrier-like protein                      |
| TCONS_00007973 | -0.767862 | -0.408193  | -0.245201  | #N/A          | #N/A                                                                                           |
| TCONS_00032430 | -0.767723 | -0.0518938 | -1.04759   | BGIOSGA031687 | XP_006662443.2PREDICTED: uncharacterized protein LOC102717187                                  |
| TCONS_00020160 | -0.767472 | -0.68758   | -0.436994  | BGIOSGA022357 | XP_004964789.1uncharacterized protein LOC101762969                                             |
| TCONS_00029236 | -0.767463 | 0.678773   | -0.743555  | BGIOSGA014063 | XP_004957138.1nuclear transcription factor Y subunit C-6                                       |
| TCONS_00036548 | -0.767333 | -1.886     | 1.68432    | BGIOSGA019635 | XP_006662667.1 CBL-interacting protein kinase 15-like                                          |
| TCONS_00025767 | -0.767014 | -0.661556  | -0.529587  | BGIOSGA027828 | XP_006659012.1 branchpoint-bridging protein isoform X2                                         |
| TCONS_00001801 | -0.766221 | 1.66193    | -0.600147  | BGIOSGA037768 | XP_022682700.1receptor-like protein kinase 5                                                   |
| TCONS_00035032 | -0.76579  | -0.356903  | 0.255705   | BGIOSGA035354 | XP_006663519.1 phosphatidate cytidyltransferase, mitochondrial                                 |
| TCONS_00034210 | -0.765662 | 0.482189   | 0.0832744  | BGIOSGA036719 | XP_003577865.140S ribosomal protein S16                                                        |
| TCONS_00007982 | -0.765069 | -0.220309  | 0.423836   | BGIOSGA033958 | XP_006647304.1 rRNA-processing protein UTP23 homolog                                           |
| TCONS_00005181 | -0.764439 | 1.59698    | 0.41876    | BGIOSGA000023 | XP_003565161.1transcription factor PCL1                                                        |
| TCONS_00019765 | -0.763942 | 0.00600175 | -1.28151   | BGIOSGA008199 | XP_006655579.2 MACPF domain-containing protein NSL1-like                                       |
| TCONS_00028144 | -0.763912 | -2.85385   | -2.45705   | BGIOSGA005531 | XP_004973655.1nitrate reductase [NADH]                                                         |
| TCONS_00019737 | -0.763446 | -1.85337   | -1.22116   | BGIOSGA017623 | XP_004961329.1serine/threonine-protein kinase STN7, chloroplastic                              |
| TCONS_00006971 | -0.7631   | -0.552059  | 0.220638   | BGIOSGA005481 | XP_006648013.1 chaperone protein DnaJ-like                                                     |
| TCONS_00013330 | -0.763015 | -0.40931   | -0.257854  | BGIOSGA009654 | XP_006651903.1 folate-biopterin transporter 1, chloroplastic-like                              |
| TCONS_00019110 | -0.762752 | -0.318545  | 0.12421    | BGIOSGA018251 | XP_015692556.1 cytosolic endo-beta-N-acetylglucosaminidase 1-like                              |
| TCONS_00017535 | -0.762617 | 0.161715   | -0.296287  | BGIOSGA024011 | XP_021312343.1ethylene-responsive transcription factor CRF3                                    |
| TCONS_00023712 | -0.762461 | -0.499804  | -0.408604  | BGIOSGA009277 | XP_015695104.1PREDICTED: uncharacterized protein LOC102716704                                  |
| TCONS_00019487 | -0.762428 | 0.458072   | -0.125123  | BGIOSGA004709 | XP_002441262.140S ribosomal protein S26                                                        |
| TCONS_00009105 | -0.762393 | -1.69787   | -0.42387   | BGIOSGA026323 | XP_006648181.1 alpha-1,3-mannosyl-glycoprotein 2-beta-N-acetylglucosaminyltransferase          |
| TCONS_00013793 | -0.762245 | -0.0812255 | -0.777972  | BGIOSGA015918 | XP_015691378.1 vacuolar protein sorting-associated protein 54, chloroplastic                   |
| TCONS_00028521 | -0.762191 | -1.0204    | -0.476383  | BGIOSGA019452 | XP_015690470.1 aldose 1-epimerase-like                                                         |
| TCONS_00001637 | -0.761961 | -0.884346  | -1.088     | BGIOSGA004271 | XP_006644570.1PREDICTED: uncharacterized protein LOC102722438                                  |
| TCONS_00013340 | -0.761878 | -0.423014  | -0.0601649 | BGIOSGA025258 | XP_006650729.1 60S ribosomal protein L4-like                                                   |
| TCONS_00006349 | -0.761353 | -1.11742   | -0.0864415 | BGIOSGA008511 | XP_015689425.1 protein FLUORESCENT IN BLUE LIGHT, chloroplastic-like isoform X1                |
| TCONS_00025684 | -0.761249 | 0.440031   | 0.18956    | BGIOSGA023713 | XP_006658092.1 potassium transporter 7                                                         |
| TCONS_00036356 | -0.760967 | 0.139529   | -1.4794    | BGIOSGA014279 | XP_004963056.1wall-associated receptor kinase-like 21 isoform X2                               |
| TCONS_00031604 | -0.760667 | 0.124464   | 0.143865   | BGIOSGA033419 | XP_008786987.1 NADH dehydrogenase [ubiquinone] 1 beta subcomplex subunit 8, mitochondrial-like |
| TCONS_00036522 | -0.760664 | -0.460996  | -1.01785   | BGIOSGA017337 | XP_006664264.1 protein transport protein Sec61 subunit beta                                    |
| TCONS_00004868 | -0.760596 | -1.53336   | -1.99817   | BGIOSGA033579 | XP_015691692.1 G-type lectin S-receptor-like serine/threonine-protein kinase At2g19130         |
| TCONS_00000890 | -0.760495 | 0.44634    | -0.414013  | BGIOSGA018783 | XP_003568901.1E3 ubiquitin-protein ligase RFI2                                                 |

transcriptome

|                |           |           |           |               |                                                                                     |
|----------------|-----------|-----------|-----------|---------------|-------------------------------------------------------------------------------------|
| TCONS_00021026 | -0.760476 | -0.650545 | -0.693633 | BGIOSGA019860 | XP_015693723.1 65-kDa microtubule-associated protein 1                              |
| TCONS_00019462 | -0.760382 | -1.17342  | -0.233342 | BGIOSGA014554 | XP_003568266.1calcium-dependent protein kinase 16                                   |
| TCONS_00012983 | -0.760287 | 1.65437   | 0.70608   | BGIOSGA018559 | XP_006651716.1PREDICTED: uncharacterized protein LOC102703671                       |
| TCONS_00019402 | -0.760218 | 0.291272  | -0.1415   | BGIOSGA017591 | XP_006655580.1 mediator of RNA polymerase II transcription subunit 13               |
| TCONS_00024657 | -0.760173 | -1.25641  | -0.117942 | BGIOSGA021729 | XP_004955608.2leucine-rich repeat extensin-like protein 4                           |
| TCONS_00015232 | -0.76006  | -3.03655  | -1.46565  | BGIOSGA006176 | XP_015691632.1 proteinaceous RNase P 1, chloroplastic/mitochondrial-like            |
| TCONS_00006272 | -0.760052 | -2.05228  | -0.820407 | BGIOSGA008430 | XP_006647378.2 zinc finger CCCH domain-containing protein 16                        |
| TCONS_00036362 | -0.759437 | 1.48761   | 0.347142  | BGIOSGA013169 | XP_006664168.1 flowering locus K homology domain                                    |
| TCONS_00031541 | -0.759121 | 1.28858   | -0.806784 | BGIOSGA013995 | XP_006662003.1 protein DOWNY MILDEW RESISTANCE 6-like                               |
| TCONS_00004176 | -0.758936 | -0.528735 | -0.483879 | BGIOSGA020340 | XP_004975378.160S ribosomal protein L37a-1                                          |
| TCONS_00012490 | -0.758929 | -1.38568  | 0.660161  | BGIOSGA012094 | XP_021307472.1RING finger protein 222                                               |
| TCONS_00037323 | -0.758907 | 0.446182  | -0.21162  | BGIOSGA001685 | XP_006664621.2 auxilin-related protein 2-like                                       |
| TCONS_00013638 | -0.758726 | -0.123761 | -0.403421 | BGIOSGA036535 | XP_006652078.1 amidase 1-like                                                       |
| TCONS_00029080 | -0.758496 | -0.462834 | 0.270369  | BGIOSGA010761 | XP_004956902.2dormancy-associated protein homolog 3 isoform X2                      |
| TCONS_00011087 | -0.758486 | 0.0891099 | 0.105547  | BGIOSGA032755 | XP_006650697.1 probable tRNA (guanine(26)-N(2))-dimethyltransferase 1               |
| TCONS_00019530 | -0.758158 | -1.64946  | -2.007    | BGIOSGA037853 | XP_006664231.1PREDICTED: uncharacterized protein LOC102709977                       |
| TCONS_00036843 | -0.758096 | 0.81274   | -0.576008 | BGIOSGA037137 | XP_015698758.1 putative disease resistance protein RGA1                             |
| TCONS_00011880 | -0.757402 | -1.16678  | -0.192297 | BGIOSGA011131 | XP_015691289.1 integrator complex subunit 9 isoform X2                              |
| TCONS_00035212 | -0.757291 | -1.01573  | 0.320626  | BGIOSGA026134 | XP_015698020.1 oligouridylylate-binding protein 1B-like                             |
| TCONS_00030164 | -0.757237 | -1.88085  | -1.47791  | BGIOSGA034236 | XP_006660692.1 tuliposide A-converting enzyme b1, amyloplastic-like                 |
| TCONS_00026080 | -0.757193 | -1.68703  | -1.12266  | BGIOSGA004315 | XP_017696093.1 peroxisomal (S)-2-hydroxy-acid oxidase-like                          |
| TCONS_00029177 | -0.757139 | -0.881569 | -0.575927 | BGIOSGA002398 | XP_006660712.2PREDICTED: uncharacterized protein LOC102717367 isoform X1            |
| TCONS_00013427 | -0.756485 | -2.7298   | -0.649704 | BGIOSGA022587 | XP_002457242.1aspartic proteinase CDR1                                              |
| TCONS_00012379 | -0.756162 | 0.233269  | 0.303691  | BGIOSGA017894 | XP_006650152.1 metacaspase-1-like                                                   |
| TCONS_00003249 | -0.755399 | -2.08893  | 0.514665  | #N/A          | #N/A                                                                                |
| TCONS_00030515 | -0.755226 | 0.027027  | -0.733027 | BGIOSGA005528 | XP_006660959.1 protein indeterminate-domain 5, chloroplastic-like                   |
| TCONS_00016617 | -0.755035 | -0.375849 | 0.35094   | BGIOSGA025878 | XP_006653769.1 probable LRR receptor-like serine/threonine-protein kinase At1g56140 |
| TCONS_00010307 | -0.754827 | -5.05381  | -2.19438  | BGIOSGA009790 | XP_006650197.1 COBRA-like protein 5                                                 |
| TCONS_00010246 | -0.75436  | 1.58946   | 1.53486   | BGIOSGA017261 | XP_015690176.1 vacuolar cation/proton exchanger 2 isoform X2                        |
| TCONS_00015057 | -0.75397  | -2.24753  | -1.84857  | BGIOSGA027224 | XP_015692300.1 synaptotagmin-5-like                                                 |
| TCONS_00016177 | -0.753602 | -2.47039  | -4.65684  | BGIOSGA007128 | XP_006652472.1 endoglucanase 12                                                     |
| TCONS_00002652 | -0.753011 | -1.65672  | -1.20414  | BGIOSGA005292 | XP_015693860.1 mitochondrial uncoupling protein 1-like                              |
| TCONS_00017008 | -0.752979 | -1.8977   | -0.500675 | BGIOSGA010658 | XP_009421350.1 myb-related protein MYBAS1 isoform X2                                |
| TCONS_00008104 | -0.752776 | -1.47137  | -0.688988 | BGIOSGA004697 | XP_006648685.1 serine/threonine-protein kinase CTR1-like                            |
| TCONS_00005323 | -0.752732 | -0.909001 | -1.21254  | BGIOSGA007432 | XP_002451453.1light-harvesting complex-like protein 3 isotype 1, chloroplastic      |
| TCONS_00036777 | -0.752661 | 0.199103  | 0.642983  | BGIOSGA036828 | XP_021317073.1uncharacterized protein LOC8079950 isoform X3                         |
| TCONS_00018414 | -0.752623 | -0.799517 | -1.47995  | BGIOSGA017626 | XP_003566864.1probable inactive receptor kinase At2g26730                           |
| TCONS_00031330 | -0.75224  | -1.05947  | -0.92932  | BGIOSGA035845 | XP_006661867.1 homeobox-leucine zipper protein HOX9                                 |
| TCONS_00010181 | -0.752201 | -1.51371  | -0.474592 | BGIOSGA012742 | XP_003557837.1protein DGS1, mitochondrial                                           |
| TCONS_00027699 | -0.752005 | -0.53472  | -0.870707 | BGIOSGA027306 | XP_008678441.1uncharacterized protein LOC100277149                                  |
| TCONS_00023978 | -0.75192  | -2.47168  | -1.52878  | BGIOSGA008619 | XP_015691515.1 AP2-like ethylene-responsive transcription factor BBM1               |
| TCONS_00015918 | -0.751694 | -0.411419 | -0.204257 | BGIOSGA015068 | XP_006653419.1 threonylcarbamoyladenosine tRNA methyltransferase                    |
| TCONS_00001351 | -0.751025 | -0.699581 | -0.97029  | BGIOSGA021863 | XP_006646093.2 GDSL esterase/lipase At1g28570                                       |
| TCONS_00012270 | -0.750966 | 0.358232  | 0.0672917 | BGIOSGA035194 | XP_004984389.1probable serine/threonine-protein kinase At1g54610                    |
| TCONS_00001573 | -0.750955 | -1.1182   | -0.993459 | BGIOSGA024746 | XP_015688083.1PREDICTED: uncharacterized protein LOC102707720 isoform X2            |
| TCONS_00033112 | -0.750461 | 0.0670484 | 0.0525607 | BGIOSGA034957 | XP_006662793.1 probable anion transporter 6 isoform X1                              |
| TCONS_00010124 | -0.750343 | 0.700525  | 0.408579  | BGIOSGA037764 | XP_006651408.2 serine/threonine-protein kinase At5g01020-like                       |
| TCONS_00004184 | -0.750247 | 1.52782   | -0.584303 | BGIOSGA019301 | XP_012701665.1uncharacterized protein LOC105914466                                  |
| TCONS_00025485 | -0.750193 | -0.46233  | -2.01225  | BGIOSGA020770 | XP_006657922.1 vestitone reductase-like                                             |
| TCONS_00001719 | -0.74978  | -2.23337  | -0.404802 | BGIOSGA017672 | XP_014751474.1disease resistance protein RGA2                                       |
| TCONS_00021720 | -0.749504 | -2.30966  | 0.0601785 | BGIOSGA023962 | XP_004954253.1heparanase-like protein 3                                             |
| TCONS_00034095 | -0.749481 | -0.233744 | -0.834386 | BGIOSGA000816 | XP_006663130.1 probable GTP-binding protein OBG1, mitochondrial                     |
| TCONS_00022514 | -0.749465 | -0.410641 | -0.011301 | BGIOSGA020850 | XP_015694107.1 pentatricopeptide repeat-containing protein At1g31430-like           |
| TCONS_00031631 | -0.748997 | -1.12744  | -1.53602  | BGIOSGA011425 | XP_004983636.1serine/threonine-protein kinase D6PK                                  |

transcriptome

|                |           |             |            |               |                                                                                                      |
|----------------|-----------|-------------|------------|---------------|------------------------------------------------------------------------------------------------------|
| TCONS_00008734 | -0.748671 | -1.55863    | -0.755562  | BGIOSGA037735 | XP_006647826.1 dof zinc finger protein DOF5.4-like                                                   |
| TCONS_00009035 | -0.748652 | -0.989426   | -1.39145   | BGIOSGA029934 | XP_006648101.1 nicotinamide/nicotinic acid mononucleotide adenylyltransferase                        |
| TCONS_00016901 | -0.748205 | -1.71613    | -0.569157  | BGIOSGA009861 | XP_006653051.1 AT-hook motif nuclear-localized protein 9-like                                        |
| TCONS_00023861 | -0.747813 | -2.96109    | -4.73919   | BGIOSGA011829 | XP_003562968.2beta-amylase isoform X1                                                                |
| TCONS_00011605 | -0.747774 | -2.12897    | -2.14671   | BGIOSGA011410 | XP_015691136.1 probable RNA helicase SDE3                                                            |
| TCONS_00001346 | -0.747774 | 0.506191    | 0.0744347  | BGIOSGA021951 | XP_006644360.2 cytochrome c oxidase subunit 5b-1, mitochondrial-like                                 |
| TCONS_00017550 | -0.746485 | -1.71861    | -1.87198   | BGIOSGA014441 | XP_002440874.1protein ACTIVITY OF BC1 COMPLEX KINASE 3, chloroplastic                                |
| TCONS_00029635 | -0.74629  | -0.239719   | -0.265581  | BGIOSGA030183 | XP_006660445.1 histone-lysine N-methyltransferase ATX2-like isoform X1                               |
| TCONS_00002533 | -0.746246 | -0.704492   | -1.38864   | BGIOSGA005176 | XP_015695557.1 uridine 5'-monophosphate synthase-like                                                |
| TCONS_00022653 | -0.745928 | 0.690893    | -0.179358  | BGIOSGA020789 | XP_003560349.1transcription initiation factor TFIID subunit 1 isoform X2                             |
| TCONS_00019930 | -0.745879 | 0.338893    | -0.20466   | BGIOSGA017430 | XP_015693261.1 translation initiation factor IF-2-like isoform X2                                    |
| TCONS_00002411 | -0.745779 | -1.07249    | -0.591246  | BGIOSGA005054 | XP_006646610.1PREDICTED: uncharacterized protein LOC102708210                                        |
| TCONS_00035427 | -0.745779 | 0.151501    | -0.93917   | BGIOSGA036834 | XP_006663701.1 protein TONNEAU 1a-like                                                               |
| TCONS_00030674 | -0.745343 | 0.368967    | -0.151754  | BGIOSGA020362 | XP_006662164.1PREDICTED: uncharacterized protein LOC102721866                                        |
| TCONS_00005139 | -0.745026 | -0.847159   | -0.593111  | BGIOSGA000033 | XP_010231908.1uncharacterized protein LOC104582790                                                   |
| TCONS_00021250 | -0.744996 | 0.134792    | -0.822469  | BGIOSGA031637 | XP_009404996.1 polyubiquitin 11                                                                      |
| TCONS_00006178 | -0.744766 | -0.130826   | -0.577304  | BGIOSGA015180 | XP_012703589.1chaperone protein ClpD1, chloroplastic                                                 |
| TCONS_00005326 | -0.744585 | 0.524342    | 0.0388925  | BGIOSGA012688 | XP_015688441.1 calcium-dependent protein kinase 16-like                                              |
| TCONS_00030001 | -0.744569 | -0.935168   | -0.989445  | BGIOSGA036028 | XP_015696663.1 protein trichome birefringence-like 14 isoform X1                                     |
| TCONS_00030564 | -0.744537 | -0.37422    | -0.592929  | BGIOSGA034819 | XP_006660997.1 40S ribosomal protein S25-2-like                                                      |
| TCONS_00012430 | -0.744483 | -0.688512   | -0.17125   | BGIOSGA034685 | XP_006650182.1PREDICTED: uncharacterized protein LOC102717967                                        |
| TCONS_00022182 | -0.744359 | -1.0599     | -0.288723  | BGIOSGA002976 | XP_006656051.1 RNA-binding protein EWS-like                                                          |
| TCONS_00000169 | -0.743996 | -3.80265    | -0.595661  | BGIOSGA034934 | XP_002457394.1protein ASPARTIC PROTEASE IN GUARD CELL 1                                              |
| TCONS_00018539 | -0.743716 | -0.231709   | 1.05814    | BGIOSGA018898 | XP_006653998.1 isoaleryl-CoA dehydrogenase, mitochondrial                                            |
| TCONS_00033032 | -0.743677 | 0.301734    | -0.408478  | BGIOSGA020348 | XP_006662761.1 tubby-like F-box protein 13                                                           |
| TCONS_00014214 | -0.743606 | 0.924779    | -0.156051  | BGIOSGA029619 | XP_006652267.1 OTU domain-containing protein 5                                                       |
| TCONS_00031614 | -0.743602 | -2.70241    | -1.53122   | BGIOSGA027617 | XP_006653885.1 RNA polymerase II transcription factor B subunit 2                                    |
| TCONS_00014450 | -0.743567 | -0.949672   | -0.155084  | BGIOSGA005228 | XP_004971348.1uncharacterized protein LOC101772585                                                   |
| TCONS_00007406 | -0.74318  | -0.802653   | -0.580036  | BGIOSGA007067 | XP_006646924.1 RNA-binding protein 5 isoform X1                                                      |
| TCONS_00014779 | -0.743153 | -2.28784    | -2.2693    | BGIOSGA012822 | XP_004976547.1uncharacterized protein LOC101779547                                                   |
| TCONS_00017275 | -0.743153 | 0.467046    | -0.394832  | #N/A          | #N/A                                                                                                 |
| TCONS_00005364 | -0.743052 | 1.00352     | -3.14231   | BGIOSGA007475 | XP_015689397.1 L-aspartate oxidase, chloroplastic                                                    |
| TCONS_00005811 | -0.742848 | 0.750497    | 0.764078   | BGIOSGA007933 | XP_015688887.1PREDICTED: uncharacterized protein LOC102705885                                        |
| TCONS_00011385 | -0.74265  | -1.88974    | -1.3161    | BGIOSGA024383 | XP_003557289.1COP1-interacting protein 7                                                             |
| TCONS_00027252 | -0.74259  | 0.579327    | 0.2149     | BGIOSGA025984 | XP_015688778.1 40S ribosomal protein S13-2                                                           |
| TCONS_00032961 | -0.742251 | -0.862441   | -0.241376  | BGIOSGA034794 | XP_006664335.1 peptidyl-prolyl cis-trans isomerase FKBP42                                            |
| TCONS_00010413 | -0.742051 | -0.753863   | -0.485474  | BGIOSGA005787 | XP_004972759.1probable polyamine transporter At1g31830                                               |
| TCONS_00016839 | -0.740865 | -0.374529   | 0.36817    | BGIOSGA028530 | XP_006653002.1 probable arabinosyltransferase ARAD1 isoform X1                                       |
| TCONS_00005862 | -0.740554 | -0.00201341 | -0.28533   | BGIOSGA021608 | XP_015691777.1 putative pentatricopeptide repeat-containing protein At5g08490                        |
| TCONS_00014437 | -0.740305 | -0.758045   | -1.19035   | BGIOSGA002732 | XP_015691330.1 G-type lectin S-receptor-like serine/threonine-protein kinase RLK1                    |
| TCONS_00017122 | -0.740262 | 0.437087    | 0.732331   | BGIOSGA019171 | XP_006654988.1 uncharacterized CRM domain-containing protein At3g25440, chloroplastic                |
| TCONS_00016105 | -0.739743 | -0.295357   | 0.0661068  | BGIOSGA006128 | XP_015692141.1 isocitrate dehydrogenase [NAD] regulatory subunit 1, mitochondrial-like               |
| TCONS_00029905 | -0.739478 | -0.498776   | 0.371734   | BGIOSGA029901 | XP_015696532.1 THO complex subunit 6 isoform X2                                                      |
| TCONS_00035457 | -0.739234 | -0.822699   | -1.25336   | BGIOSGA028217 | XP_019078711.1 ethanolamine-phosphate cytidylyltransferase isoform X2                                |
| TCONS_00037360 | -0.739212 | -0.955176   | -0.793985  | BGIOSGA001316 | XP_006664100.1 RNA pseudouridine synthase 1                                                          |
| TCONS_00018777 | -0.739048 | -1.01197    | 0.790569   | BGIOSGA007818 | XP_006654138.1 pollen-specific protein SF21-like                                                     |
| TCONS_00002204 | -0.738903 | -0.325017   | -0.739937  | BGIOSGA029185 | XP_015689347.1 60S ribosomal protein L10a-like                                                       |
| TCONS_00017750 | -0.738751 | 1.31334     | -0.0373499 | BGIOSGA019812 | XP_024314920.1leucine-rich repeat receptor-like serine/threonine-protein kinase At2g14510 isoform X2 |
| TCONS_00010962 | -0.738732 | -1.68792    | 0.590051   | BGIOSGA013562 | XP_015690733.1 beta-glucosidase BoGH3B-like                                                          |
| TCONS_00021662 | -0.738583 | -0.707736   | -0.280774  | #N/A          | #N/A                                                                                                 |
| TCONS_00036312 | -0.738473 | -0.0715848  | -0.301056  | BGIOSGA004012 | XP_006664145.1 E3 ubiquitin-protein ligase SDIR1-like                                                |
| TCONS_00000601 | -0.738362 | -1.01283    | -0.448171  | BGIOSGA009933 | XP_015688191.1 mediator-associated protein 2                                                         |
| TCONS_00018656 | -0.738328 | -2.80732    | -0.651898  | BGIOSGA017544 | XP_015692844.1 GATA transcription factor 23-like                                                     |

transcriptome

|                |           |                 |                 |               |                                                                                                |
|----------------|-----------|-----------------|-----------------|---------------|------------------------------------------------------------------------------------------------|
| TCONS_00003778 | -0.737763 | -0.703244       | -1.08709        | BGIOSGA030676 | XP_015688188.1 8-amino-7-oxononanoate synthase-like isoform X1                                 |
| TCONS_00010333 | -0.737763 | -0.582152       | -0.420509       | BGIOSGA038782 | XP_006650204.2 mediator of RNA polymerase II transcription subunit 8                           |
| TCONS_00009960 | -0.737337 | -0.206494       | <b>0.577392</b> | BGIOSGA023689 | XP_003558036.1SNF1-related protein kinase regulatory subunit beta-1                            |
| TCONS_00023753 | -0.73716  | -0.381663       | -0.375708       | BGIOSGA010995 | XP_006657753.2 bromodomain-containing protein DDB_G0270170                                     |
| TCONS_00001081 | -0.737119 | -0.820316       | 0.114738        | BGIOSGA013718 | XP_004968887.1 uncharacterized protein LOC101756105 isoform X2                                 |
| TCONS_00007636 | -0.736986 | -0.525544       | -1.07205        | BGIOSGA006845 | XP_006647086.1 early nodulin-93-like                                                           |
| TCONS_00017007 | -0.736849 | -0.28812        | -0.64343        | BGIOSGA019053 | XP_006654918.1 PREDICTED: uncharacterized protein LOC102713910                                 |
| TCONS_00027920 | -0.736485 | -2.65904        | -0.800734       | BGIOSGA027072 | XP_015695839.1 protein tesmin/TSO1-like CXC 7                                                  |
| TCONS_00014789 | -0.736426 | -0.0943348      | 0.177093        | BGIOSGA016962 | XP_015692140.1 ankyrin repeat and zinc finger domain-containing protein 1                      |
| TCONS_00021320 | -0.736321 | 0.00921013      | -2.08256        | BGIOSGA039369 | XP_006657300.2 probable aminodeoxychorismate synthase, chloroplastic                           |
| TCONS_00033705 | -0.736309 | -0.904221       | -0.0210107      | BGIOSGA035235 | XP_015697699.1 zinc finger CCHC domain-containing protein 7-like                               |
| TCONS_00036728 | -0.736122 | -1.62975        | -1.26106        | BGIOSGA022575 | XP_022684940.1BEL1-like homeodomain protein 1                                                  |
| TCONS_00021842 | -0.736076 | -0.437167       | -0.988158       | BGIOSGA033403 | XP_015694383.1 PREDICTED: uncharacterized protein LOC102718283                                 |
| TCONS_00003046 | -0.735171 | -0.235671       | -0.218368       | BGIOSGA023073 | XP_003565213.2 protein BZR1 homolog 2                                                          |
| TCONS_00023342 | -0.73482  | -1.9534         | -1.02469        | BGIOSGA025384 | XP_022682008.1 exocyst complex component EXO70B1-like                                          |
| TCONS_00013016 | -0.734678 | -1.50535        | -0.670402       | BGIOSGA037334 | XP_015691246.1 pinin                                                                           |
| TCONS_00031817 | -0.734637 | -2.57833        | -2.59187        | BGIOSGA035157 | XP_006660837.1 solute carrier family 35 member F1-like                                         |
| TCONS_00031611 | -0.734559 | -0.0418579      | -0.399566       | BGIOSGA014584 | XP_006662042.1 putative glucuronosyltransferase PGSIP7 isoform X1                              |
| TCONS_00003642 | -0.734548 | -1.75244        | 0.244477        | BGIOSGA025677 | XP_006645926.1 metal transporter Nramp4 isoform X1                                             |
| TCONS_00016761 | -0.734437 | -0.799441       | -0.177475       | BGIOSGA014203 | XP_015691600.1 golgin candidate 2                                                              |
| TCONS_00015198 | -0.733821 | <b>0.493802</b> | -0.875322       | BGIOSGA013850 | XP_015692209.1 probable serine/threonine-protein kinase At5g41260                              |
| TCONS_00001141 | -0.73371  | -1.66813        | -1.42841        | BGIOSGA005949 | XP_015698906.1 vacuolar-processing enzyme                                                      |
| TCONS_00038791 | -0.733402 | -1.5518         | -1.41596        | BGIOSGA034298 | XP_024310899.1 probable LRR receptor-like serine/threonine-protein kinase At4g29180 isoform X2 |
| TCONS_00004122 | -0.733394 | -0.29592        | 0.21785         | BGIOSGA020374 | XP_006646178.2 PREDICTED: putative uncharacterized protein DDB_G0277255 isoform X1             |
| TCONS_00036388 | -0.733135 | -1.49305        | -1.01569        | BGIOSGA006359 | XP_006664166.1 gamma-tubulin complex component 5-like isoform X1                               |
| TCONS_00007285 | -0.733105 | -3.45107        | -1.43675        | BGIOSGA007199 | XP_015688989.1 protein LOW PSII ACCUMULATION 3, chloroplastic                                  |
| TCONS_00029767 | -0.732977 | -2.10857        | -0.130728       | BGIOSGA023596 | XP_021318845.1 probable serine/threonine-protein kinase PIX13                                  |
| TCONS_00002381 | -0.73278  | #NA             | -1.35585        | BGIOSGA005015 | XP_006645197.1 proline transporter 1-like                                                      |
| TCONS_00012297 | -0.732552 | -0.638443       | -0.123102       | BGIOSGA020904 | XP_006650100.1 PREDICTED: uncharacterized protein LOC102716943 isoform X1                      |
| TCONS_00029216 | -0.73244  | -0.966803       | -0.776958       | BGIOSGA035063 | XP_015696741.1 transcription factor BIM2                                                       |
| TCONS_00019949 | -0.732011 | -0.472282       | -0.942637       | BGIOSGA022133 | XP_015694095.1 membrane protein of ER body-like protein isoform X2                             |
| TCONS_00008640 | -0.731384 | -0.686997       | -2.50642        | BGIOSGA009203 | XP_006647744.1 protein Brevis radix-like 2                                                     |
| TCONS_00006835 | -0.731227 | <b>0.893116</b> | -0.430371       | BGIOSGA009009 | XP_015689549.1 ATP-dependent RNA helicase DEAH13                                               |
| TCONS_00022813 | -0.731167 | -1.00342        | -1.12104        | BGIOSGA020637 | XP_006657282.1 DNA repair protein REV1 isoform X1                                              |
| TCONS_00018002 | -0.731031 | -3.30107        | -3.14793        | BGIOSGA035187 | XP_014660333.1 non-specific lipid-transfer protein 1-like                                      |
| TCONS_00000420 | -0.730756 | -5.25016        | -2.00779        | BGIOSGA018768 | XP_015691735.1 GDSL esterase/lipase At5g45910-like                                             |
| TCONS_00027803 | -0.730356 | <b>0.633635</b> | <b>0.660956</b> | BGIOSGA029619 | XP_012698550.14-hydroxybenzoate polyprenyltransferase, mitochondrial                           |
| TCONS_00011493 | -0.729664 | -0.689164       | -1.51068        | BGIOSGA011533 | XP_021310221.1 DNA polymerase delta small subunit isoform X2                                   |
| TCONS_00036532 | -0.729105 | -0.859634       | -1.40027        | BGIOSGA002158 | XP_006662650.1 probable LRR receptor-like serine/threonine-protein kinase MRH1                 |
| TCONS_00003027 | -0.72885  | -1.2505         | -1.68127        | BGIOSGA009908 | XP_015688305.1 monoglyceride lipase                                                            |
| TCONS_00005143 | -0.72883  | -0.0812795      | -1.66809        | BGIOSGA016432 | XP_006645354.1 40S ribosomal protein S10-like                                                  |
| TCONS_00024437 | -0.728578 | <b>0.943951</b> | -0.190685       | BGIOSGA022229 | XP_003557694.2 sugar transport protein MST3                                                    |
| TCONS_00006666 | -0.728497 | -0.250058       | 0.130286        | BGIOSGA008835 | XP_006647705.1 probable dolichyl pyrophosphate Glc1Man9GlcNAc2 alpha-1,3-glucosyltransferase   |
| TCONS_00011022 | -0.728443 | 0.209545        | -0.000315788    | BGIOSGA037704 | XP_003558930.1 uncharacterized protein LOC100837825                                            |
| TCONS_00014396 | -0.728431 | -0.224629       | -0.10459        | BGIOSGA002981 | XP_006652359.1 14-3-3-like protein GF14-B                                                      |
| TCONS_00019232 | -0.728132 | -0.850091       | -1.09267        | BGIOSGA001576 | XP_004962186.1 uncharacterized protein LOC101784684                                            |
| TCONS_00007139 | -0.728121 | -0.512522       | -1.08224        | BGIOSGA004365 | XP_002453074.1 caffeic acid 3-O-methyltransferase                                              |
| TCONS_00001202 | -0.727004 | 0.172566        | -1.01475        | BGIOSGA032709 | XP_006646030.1 beta-galactosidase 2                                                            |
| TCONS_00026553 | -0.726918 | -1.5194         | -0.050659       | BGIOSGA001311 | XP_006660106.1 PREDICTED: uncharacterized protein LOC102709021                                 |
| TCONS_00029546 | -0.726753 | <b>1.76542</b>  | 0.0737805       | BGIOSGA034249 | XP_015696477.1 U-box domain-containing protein 33-like isoform X1                              |
| TCONS_00011162 | -0.726633 | 0.20535         | -2.03735        | BGIOSGA025344 | XP_006651930.1 squalene synthase-like                                                          |
| TCONS_00003347 | -0.72653  | -2.2238         | -0.483525       | BGIOSGA022512 | XP_015688295.1 transcription factor APG-like                                                   |
| TCONS_00021604 | -0.726358 | -1.31946        | 0.281423        | #N/A          | #N/A                                                                                           |
| TCONS_00003266 | -0.725698 | -1.64392        | -0.579734       | BGIOSGA001949 | XP_020405021.1 uncharacterized protein LOC100191545 isoform X2                                 |

transcriptome

|                |           |           |             |               |                                                                                                                                 |
|----------------|-----------|-----------|-------------|---------------|---------------------------------------------------------------------------------------------------------------------------------|
| TCONS_00013603 | -0.725447 | -4.08553  | -0.657589   | BGIOSGA001229 | XP_006652072.1PREDICTED: uncharacterized protein LOC102710580                                                                   |
| TCONS_00024073 | -0.725298 | -0.179342 | 0.0588517   | BGIOSGA026107 | XP_003562710.1.protein bem46                                                                                                    |
| TCONS_00031375 | -0.725253 | -0.678903 | -0.25803    | BGIOSGA025437 | XP_015697036.1.alpha-galactosidase 1-like                                                                                       |
| TCONS_00013459 | -0.725038 | 0.269118  | 0.184558    | BGIOSGA027861 | XP_015690999.1.protein-lysine methyltransferase METTL21B                                                                        |
| TCONS_00008163 | -0.724854 | 0.689215  | 0.162212    | BGIOSGA006278 | XP_006647360.1.exosome complex component RRP45A-like isoform X2                                                                 |
| TCONS_00014312 | -0.724727 | -1.15901  | -1.03375    | BGIOSGA012442 | XP_004975725.1.calmodulin-binding protein 60 D isoform X2                                                                       |
| TCONS_00004079 | -0.724721 | -2.82402  | -1.20069    | BGIOSGA021585 | XP_006644448.1.protein trichome birefringence-like 19                                                                           |
| TCONS_00024403 | -0.724622 | -1.29615  | -1.34651    | BGIOSGA036804 | XP_015695174.1.ubiquitin-activating enzyme E1 3-like isoform X2                                                                 |
| TCONS_00014973 | -0.723895 | 0.550938  | -0.692248   | BGIOSGA017154 | XP_003579311.1.putative disease resistance protein At3g14460                                                                    |
| TCONS_00030105 | -0.723685 | 0.859874  | -0.903446   | BGIOSGA028554 | XP_006660655.1.E3 ubiquitin-protein ligase RNF14-like                                                                           |
| TCONS_00004805 | -0.723609 | -0.268431 | -1.40099    | BGIOSGA034888 | XP_006645091.1.amidophosphoribosyltransferase, chloroplast-like                                                                 |
| TCONS_00021448 | -0.723489 | -1.13441  | -0.296844   | BGIOSGA022101 | XP_006656545.1.dihydrolypolyllysine-residue acetyltransferase component 2 of pyruvate dehydrogenase complex, mitochondrial-like |
| TCONS_00025095 | -0.723355 | -1.33084  | -1.11154    | BGIOSGA005888 | XP_004957703.1FT-interacting protein 1                                                                                          |
| TCONS_00013258 | -0.723075 | 0.364509  | -0.89326    | BGIOSGA015415 | XP_015690092.1.proline-rich receptor-like protein kinase PERK4                                                                  |
| TCONS_00035600 | -0.722974 | -0.851521 | -0.583299   | BGIOSGA000169 | XP_012703259.1.uncharacterized protein LOC101782771                                                                             |
| TCONS_00036250 | -0.722775 | 0.533932  | 0.556023    | BGIOSGA037609 | XP_006664111.1.protein MODIFIER OF SNC1 1                                                                                       |
| TCONS_00005114 | -0.722247 | -0.379452 | -0.706306   | BGIOSGA030998 | XP_015691020.1.protein LATERAL ROOT PRIMORDIUM 1                                                                                |
| TCONS_00000909 | -0.7222   | -0.464141 | -0.719338   | BGIOSGA003498 | XP_006647964.1.ferredoxin--nitrite reductase, chloroplastic                                                                     |
| TCONS_00035636 | -0.721994 | 0.437435  | 0.220028    | BGIOSGA034880 | XP_006662762.2.60S ribosomal protein L3-like                                                                                    |
| TCONS_00036867 | -0.721674 | -1.05526  | -1.10867    | BGIOSGA002841 | XP_006663910.1.receptor-like protein 12                                                                                         |
| TCONS_00025081 | -0.721329 | -0.693309 | 0.832198    | BGIOSGA014047 | XP_003563136.1.serine/threonine-protein kinase STY17                                                                            |
| TCONS_00034839 | -0.72131  | -2.29341  | -0.337974   | BGIOSGA037011 | XP_006663435.1.cysteine-rich receptor-like protein kinase 42                                                                    |
| TCONS_00008655 | -0.721272 | -2.71575  | -1.23023    | BGIOSGA005773 | XP_006647761.1PREDICTED: uncharacterized protein LOC102710665                                                                   |
| TCONS_00003668 | -0.721152 | 0.210306  | -0.00288269 | BGIOSGA001539 | XP_006645938.1.nicotinamide adenine dinucleotide transporter 2, mitochondrial-like                                              |
| TCONS_00006156 | -0.720789 | -0.728751 | -0.910675   | BGIOSGA022663 | XP_015697715.1PREDICTED: uncharacterized protein LOC102712867                                                                   |
| TCONS_00013182 | -0.720692 | 1.37874   | -0.0948345  | BGIOSGA009803 | XP_006651826.1.transcriptional adapter ADA2                                                                                     |
| TCONS_00024119 | -0.720591 | -1.53392  | -0.53814    | BGIOSGA026154 | XP_015695063.1.calcium-binding protein CML38-like                                                                               |
| TCONS_00006940 | -0.720535 | 1.41389   | 0.101518    | BGIOSGA018799 | XP_006647976.1.1-aminocyclopropane-1-carboxylate oxidase                                                                        |
| TCONS_00020221 | -0.720334 | 0.381086  | 0.279718    | BGIOSGA021342 | XP_006655830.1.proteasome subunit alpha type-4-2                                                                                |
| TCONS_00012910 | -0.720278 | -4.31436  | -0.742021   | BGIOSGA027985 | XP_006651678.1.homeobox protein knotted-1-like 4 isoform X2                                                                     |
| TCONS_00029212 | -0.72002  | -0.144759 | 0.994304    | BGIOSGA014151 | XP_015696518.1.transcription factor bHLH49                                                                                      |
| TCONS_00028348 | -0.719963 | -0.403942 | -0.498528   | BGIOSGA018585 | XP_015695674.1.RPM1-interacting protein 4                                                                                       |
| TCONS_00004412 | -0.719941 | 0.482258  | -0.829109   | BGIOSGA020500 | XP_014754463.1.callose synthase 11                                                                                              |
| TCONS_00012188 | -0.719841 | 0.578175  | 0.583394    | BGIOSGA029518 | XP_015689877.1.NAC domain-containing protein 100-like                                                                           |
| TCONS_00023763 | -0.719526 | -0.797902 | -0.381169   | BGIOSGA006747 | XP_022680353.1.uncharacterized protein LOC101755892                                                                             |
| TCONS_00023893 | -0.718934 | -0.792489 | 0.254646    | BGIOSGA023659 | XP_002462239.2.uncharacterized protein LOC8055533                                                                               |
| TCONS_00034124 | -0.718727 | -0.286564 | -0.856898   | BGIOSGA018227 | XP_006662650.1.probable LRR receptor-like serine/threonine-protein kinase MRH1                                                  |
| TCONS_00026622 | -0.718571 | 0.505387  | -0.308763   | BGIOSGA025290 | XP_006659406.1.chromatin remodeling protein EBS-like isoform X2                                                                 |
| TCONS_00002079 | -0.718362 | -0.168352 | -0.751081   | BGIOSGA003376 | XP_002441262.140S ribosomal protein S26                                                                                         |
| TCONS_00003565 | -0.718054 | 0.0267279 | -1.42643    | BGIOSGA001640 | XP_001420315.1.predicted protein                                                                                                |
| TCONS_00017506 | -0.7176   | -0.298517 | -1.92935    | BGIOSGA037588 | XP_015692537.1.probable linoleate 9S-lipoxygenase 5                                                                             |
| TCONS_00021264 | -0.716967 | -1.00511  | -1.01892    | BGIOSGA023490 | XP_006656399.1.auxin response factor 18                                                                                         |
| TCONS_00020911 | -0.716863 | -0.870564 | -0.524803   | BGIOSGA009241 | XP_003563721.1GATA transcription factor 21                                                                                      |
| TCONS_00022897 | -0.716804 | 1.0092    | -0.0792396  | BGIOSGA020547 | XP_006657335.2.protein FAM63B                                                                                                   |
| TCONS_00035741 | -0.716323 | 0.792203  | 0.0402422   | BGIOSGA023433 | XP_015698242.1.probable leucine-rich repeat receptor-like protein kinase At5g49770                                              |
| TCONS_00018188 | -0.715954 | -0.350758 | 0.00262994  | BGIOSGA020471 | XP_015693113.1.plasminogen activator inhibitor 1 RNA-binding protein-like isoform X1                                            |
| TCONS_00029098 | -0.715141 | -0.495745 | -0.243314   | BGIOSGA000481 | XP_003578192.1O-fucosyltransferase 35                                                                                           |
| TCONS_00031791 | -0.714791 | -0.349001 | -0.941268   | BGIOSGA007774 | XP_002450002.2.disease resistance protein RPP13                                                                                 |
| TCONS_00036077 | -0.714746 | -0.197678 | 0.0376944   | BGIOSGA037441 | XP_015698406.1.glycine-rich RNA-binding protein bIt801                                                                          |
| TCONS_00026313 | -0.71453  | -0.481484 | 0.0161494   | BGIOSGA011746 | XP_010234555.2.homeobox protein knotted-1-like 13 isoform X1                                                                    |
| TCONS_00007737 | -0.714375 | -0.513869 | 1.0623      | BGIOSGA037452 | XP_006664050.1.cyclic pyranopterin monophosphate synthase, mitochondrial                                                        |
| TCONS_00028680 | -0.714367 | -1.60759  | -0.874264   | BGIOSGA030429 | XP_015696744.1.SURP and G-patch domain-containing protein 1-like protein                                                        |
| TCONS_00007025 | -0.714326 | 0.742422  | 0.334253    | BGIOSGA021784 | XP_017625336.1.60S ribosomal protein L39                                                                                        |
| TCONS_00009104 | -0.71429  | 0.085113  | 0.394482    | BGIOSGA005297 | XP_006648178.1.outer envelope pore protein 21, chloroplastic-like                                                               |
| TCONS_00032353 | -0.714229 | -1.0672   | 1.76384     | BGIOSGA010737 | XP_006661828.1.E3 ubiquitin-protein ligase MIEL1-like                                                                           |

## transcriptome

|                |           |            |            |               |                                                                                 |
|----------------|-----------|------------|------------|---------------|---------------------------------------------------------------------------------|
| TCONS_00000084 | -0.7142   | -2.341     | -0.4143    | BGIOSGA006565 | XP_006643724.1 WAT1-related protein At3g18200-like                              |
| TCONS_00013454 | -0.713943 | -0.187908  | -1.70785   | BGIOSGA020093 | XP_015690743.1 calmodulin-binding receptor-like cytoplasmic kinase 2 isoform X3 |
| TCONS_00009328 | -0.713757 | -0.178844  | 0.142021   | BGIOSGA022199 | XP_006651048.1 WD repeat-containing protein 3                                   |
| TCONS_00014088 | -0.713517 | -1.51409   | -1.10288   | BGIOSGA016239 | XP_003581133.1 uncharacterized protein At3g27210 isoform X1                     |
| TCONS_00026817 | -0.71298  | 0.605299   | 0.145944   | BGIOSGA028878 | XP_006659517.1 PREDICTED: uncharacterized protein LOC102716893                  |
| TCONS_00012198 | -0.712958 | -0.829985  | -1.19612   | BGIOSGA010808 | XP_015690806.1 protein stum-like                                                |
| TCONS_00035681 | -0.712937 | -0.261778  | -0.492751  | BGIOSGA037100 | XP_004985978.1 uncharacterized protein LOC101765276 isoform X2                  |
| TCONS_00030036 | -0.712836 | -3.51582   | 1.34525    | BGIOSGA030755 | XP_010238156.1 uncharacterized protein LOC104584676                             |
| TCONS_00017948 | -0.711979 | 0.367782   | -0.910162  | BGIOSGA006433 | XP_015692856.1 protein GPR107                                                   |
| TCONS_00028917 | -0.711913 | -1.70474   | 1.53553    | BGIOSGA009606 | XP_006661184.1 probable acyl-activating enzyme 17, peroxisomal                  |
| TCONS_00001877 | -0.711794 | -0.104421  | -0.0325479 | BGIOSGA004511 | XP_006644762.1 PREDICTED: uncharacterized protein LOC102708939                  |
| TCONS_00001982 | -0.711756 | -1.24902   | -1.48893   | BGIOSGA004616 | XP_024315087.1 disease resistance protein At4g27190                             |
| TCONS_00035049 | -0.711669 | -0.479414  | -1.04028   | BGIOSGA004260 | XP_006662979.1 myb-related protein 306-like                                     |
| TCONS_00028055 | -0.711508 | -1.85813   | -0.555253  | BGIOSGA017615 | XP_015695611.1 NAC transcription factor 29                                      |
| TCONS_00001937 | -0.710504 | -1.56312   | -0.996497  | BGIOSGA000701 | XP_015691453.1 putative disease resistance RPP13-like protein 1                 |
| TCONS_00018326 | -0.710353 | 1.56815    | -1.46815   | BGIOSGA025611 | XP_004961187.1 protein RADIALIS-like 3                                          |
| TCONS_00027722 | -0.710281 | -0.643661  | -0.888635  | BGIOSGA027284 | XP_003573223.1 mediator of RNA polymerase II transcription subunit 15a          |
| TCONS_00001085 | -0.709771 | -0.0162754 | 0.390195   | BGIOSGA006640 | XP_006644291.1 bidirectional sugar transporter SWEET2a                          |
| TCONS_00021544 | -0.709608 | -0.474743  | -1.21567   | BGIOSGA015766 | XP_004964433.1 arginine decarboxylase 1                                         |
| TCONS_00001296 | -0.709554 | -0.653987  | -0.998441  | BGIOSGA017460 | XP_015688063.1 inactive protein kinase SELMODRAFT_444075-like                   |
| TCONS_00029186 | -0.709346 | 0.22197    | -1.75401   | BGIOSGA001420 | XP_006660720.2 glutathione transferase GST 23-like                              |
| TCONS_00011192 | -0.708765 | 0.23153    | 0.561339   | BGIOSGA025387 | XP_006651941.1 protein phosphatase 2C 70-like                                   |
| TCONS_00002547 | -0.708344 | -0.668734  | -1.63392   | BGIOSGA000093 | XP_006645379.1 probable NADPH:quinone oxidoreductase 2                          |
| TCONS_00004130 | -0.708244 | -0.405232  | -1.70109   | BGIOSGA025053 | XP_003566969.1 GDSL esterase/lipase At4g10955                                   |
| TCONS_00030491 | -0.708159 | -0.0844034 | -0.502753  | BGIOSGA014220 | XP_006660944.1 bromodomain-containing protein 4B-like                           |
| TCONS_00025862 | -0.707784 | -2.07942   | -1.64552   | BGIOSGA017137 | XP_015696057.1 probable UDP-arabinose 4-epimerase 3 isoform X2                  |
| TCONS_00014506 | -0.707456 | 0.345513   | -1.11066   | BGIOSGA024505 | XP_006652455.1 probable calcium-binding protein CML22                           |
| TCONS_00023202 | -0.707079 | 0.27381    | 0.0858804  | BGIOSGA025244 | XP_015695266.1 MMS19 nucleotide excision repair protein homolog                 |
| TCONS_00013888 | -0.706898 | 0.0609562  | -0.0615123 | #N/A          | #N/A                                                                            |
| TCONS_00009058 | -0.706452 | 0.533772   | 0.00864633 | BGIOSGA032526 | XP_004954416.1 protein KINESIN LIGHT CHAIN-RELATED 2                            |
| TCONS_00030828 | -0.706277 | -1.3008    | -0.384053  | BGIOSGA017413 | XP_021302658.1 uncharacterized protein LOC8077899 isoform X2                    |
| TCONS_00028038 | -0.706237 | -2.49342   | -1.59372   | BGIOSGA026953 | XP_015696094.1 THO complex subunit 4D-like isoform X2                           |
| TCONS_00026859 | -0.706218 | -2.47296   | -1.05034   | BGIOSGA013792 | XP_006659534.1 probable galactinol--sucrose galactosyltransferase 1             |
| TCONS_00010971 | -0.706112 | -0.678113  | -0.0505063 | BGIOSGA012476 | XP_006650597.1 phytochrome C                                                    |
| TCONS_00007506 | -0.70564  | -1.00462   | -0.516419  | BGIOSGA004239 | XP_003571064.1 alpha/beta hydrolase domain-containing protein 17C               |
| TCONS_00008563 | -0.705335 | -1.34219   | -1.19956   | BGIOSGA013699 | XP_015689391.1 protein argonaute 1A isoform X2                                  |
| TCONS_00014108 | -0.70529  | 1.7702     | 0.342192   | BGIOSGA016263 | XP_006644320.2 branchpoint-bridging protein                                     |
| TCONS_00006788 | -0.705283 | -0.226763  | -0.249015  | BGIOSGA008963 | XP_015688723.1 tRNA methyltransferase 10 homolog A                              |
| TCONS_00028289 | -0.705195 | -0.236266  | -0.501891  | BGIOSGA026690 | XP_006659578.1 plant intracellular Ras-group-related LRR protein 4              |
| TCONS_00009334 | -0.70517  | #NA        | #NA        | BGIOSGA011881 | XP_015690478.1 FAD-dependent urate hydroxylase-like                             |
| TCONS_00027658 | -0.704777 | 1.95605    | -1.38777   | BGIOSGA036847 | XP_008662693.1 protein SMAX1-like                                               |
| TCONS_00011758 | -0.70475  | -0.661898  | -0.180564  | BGIOSGA011247 | XP_015690542.1 FAD-linked sulfhydryl oxidase ERV1                               |
| TCONS_00033661 | -0.70462  | -0.065549  | 0.250222   | BGIOSGA035443 | XP_006662980.1 actin-related protein 2/3 complex subunit 5A-like                |
| TCONS_00002989 | -0.70448  | -1.27521   | -1.1279    | BGIOSGA030173 | XP_015694374.1 PREDICTED: uncharacterized protein LOC102710794                  |
| TCONS_00007682 | -0.704348 | -0.156384  | -1.54083   | BGIOSGA035541 | XP_006648495.1 hydroquinone glucosyltransferase-like                            |
| TCONS_00027030 | -0.704322 | -1.38334   | 0.166801   | BGIOSGA013958 | XP_004974059.1 tankyrin repeat domain-containing protein 2A                     |
| TCONS_00031880 | -0.704275 | -1.41023   | -1.0105    | BGIOSGA024599 | XP_008672768.1 thioredoxin superfamily protein isoform X1                       |
| TCONS_00004756 | -0.703883 | -4.11116   | -2.38998   | BGIOSGA019949 | XP_008672666.1 uncharacterized LOC100278681 isoform X1                          |
| TCONS_00007425 | -0.703554 | -0.650395  | -0.470904  | BGIOSGA034461 | XP_006648354.1 copper-transporting ATPase RAN1-like                             |
| TCONS_00031228 | -0.703309 | 1.22384    | 0.00844874 | BGIOSGA028838 | XP_015697008.1 PREDICTED: uncharacterized protein LOC102702414                  |
| TCONS_00034842 | -0.703283 | -0.997414  | -0.648974  | BGIOSGA037268 | XP_006662931.1 zinc finger CCCH domain-containing protein 63                    |
| TCONS_00032697 | -0.703275 | -2.30457   | -0.0695512 | BGIOSGA019401 | XP_015697078.1 PREDICTED: uncharacterized protein LOC102718872, partial         |



transcriptome

|                |           |            |             |               |                                                                                        |
|----------------|-----------|------------|-------------|---------------|----------------------------------------------------------------------------------------|
| TCONS_00035646 | -0.703256 | -0.0784973 | 0.0380946   | BGIOSGA037067 | XP_006663862.1 RNA cytidine acetyltransferase 1-like                                   |
| TCONS_00005906 | -0.703162 | 0.316657   | 0.405805    | BGIOSGA004832 | XP_015691946.1 DNA excision repair protein ERCC-8-like                                 |
| TCONS_00019456 | -0.702568 | -0.516964  | -0.619992   | BGIOSGA000537 | XP_004961800.1TBC1 domain family member 10B                                            |
| TCONS_00006808 | -0.70249  | -0.40168   | -0.186259   | BGIOSGA021662 | XP_006647842.1 MADS-box transcription factor 57 isoform X2                             |
| TCONS_00016862 | -0.702386 | 0.863095   | 0.241801    | BGIOSGA009838 | XP_008668693.1probable acyl-activating enzyme 5, peroxisomal                           |
| TCONS_00019525 | -0.702282 | 0.857848   | 1.22132     | BGIOSGA014947 | XP_006655431.1 probable leucine-rich repeat receptor-like protein kinase At5g49770     |
| TCONS_00034519 | -0.702262 | -1.10261   | -0.52277    | BGIOSGA028326 | XP_015697970.1 putative disease resistance protein RGA4                                |
| TCONS_00001199 | -0.702228 | -0.679585  | 0.379104    | BGIOSGA017450 | XP_004969422.1protein HIR1                                                             |
| TCONS_00013311 | -0.701899 | 0.0827448  | 0.252833    | BGIOSGA038334 | XP_006650706.1 probable aldehyde oxidase 2                                             |
| TCONS_00010356 | -0.70183  | -1.68708   | -0.497879   | BGIOSGA012938 | XP_015698679.1 mechanosensitive ion channel protein 2, chloroplastic-like isoform X2   |
| TCONS_00037929 | -0.701346 | -0.571981  | -0.485512   | BGIOSGA032375 | XP_015697254.1PREDICTED: uncharacterized protein LOC102715977                          |
| TCONS_00017164 | -0.701024 | 0.123006   | -0.491183   | BGIOSGA026380 | XP_002439318.160S ribosomal protein L18-3                                              |
| TCONS_00010970 | -0.700897 | -2.40369   | -0.495107   | BGIOSGA031506 | XP_015690342.1 sulfated surface glycoprotein 185 isoform X1                            |
| TCONS_00005234 | -0.700607 | -0.673458  | -4.60419    | BGIOSGA016364 | XP_006646767.1 sucrose:sucrose 1-fructosyltransferase-like                             |
| TCONS_00037510 | -0.700198 | -1.46518   | 0.248016    | BGIOSGA037764 | XP_006664184.1 putative serine/threonine-protein kinase                                |
| TCONS_00030857 | -0.700192 | -0.554033  | -0.370236   | BGIOSGA032184 | XP_015697115.1 uncharacterized calcium-binding protein At1g02270                       |
| TCONS_00012086 | -0.700026 | 0.859386   | 0.313939    | BGIOSGA010926 | XP_006649924.1 gamma-interferon-inducible lysosomal thiol reductase-like isoform X1    |
| TCONS_00023326 | -0.699954 | -1.62065   | -0.598062   | BGIOSGA023374 | XP_006657544.1 transcription initiation factor TFIIID subunit 5-like isoform X2        |
| TCONS_00002148 | -0.69949  | -0.152153  | #NA         | BGIOSGA004776 | XP_006644991.1 elicitor-responsive protein 1 isoform X1                                |
| TCONS_00025092 | -0.699254 | -0.0390077 | -0.605912   | BGIOSGA024307 | XP_006657698.1 putative disease resistance protein RGA3                                |
| TCONS_00031923 | -0.698942 | -1.4957    | -1.20032    | BGIOSGA032222 | XP_006662227.2 pentatricopeptide repeat-containing protein MRL1, chloroplastic         |
| TCONS_00035689 | -0.698887 | -0.728455  | 0.995381    | BGIOSGA037107 | XP_006663888.1 2-oxoisovalerate dehydrogenase subunit alpha 2, mitochondrial           |
| TCONS_00030022 | -0.697574 | -0.763138  | -1.52233    | BGIOSGA029784 | XP_015696250.1 sprT-like domain-containing protein Spartan isoform X2                  |
| TCONS_00019051 | -0.697332 | 0.4103     | -0.269122   | BGIOSGA006841 | XP_006654257.1 receptor-like protein kinase FERONIA                                    |
| TCONS_00023543 | -0.697197 | -0.533897  | -1.13236    | BGIOSGA004871 | XP_006658496.1 sterol 3-beta-glucosyltransferase UGT80A2-like                          |
| TCONS_00036488 | -0.696768 | -0.336728  | -1.13729    | BGIOSGA019255 | XP_015698378.1 receptor-like protein kinase HSL1                                       |
| TCONS_00008462 | -0.696552 | -1.25814   | -0.638917   | BGIOSGA033028 | XP_006647582.1 putative serine/threonine-protein kinase                                |
| TCONS_00021234 | -0.696294 | -0.58495   | -0.271828   | BGIOSGA007073 | XP_006656375.1PREDICTED: uncharacterized protein LOC102711268                          |
| TCONS_00005631 | -0.696286 | -1.99448   | -0.201728   | BGIOSGA007743 | XP_015688370.1 putative F-box protein At2g02030                                        |
| TCONS_00005844 | -0.696033 | 0.352787   | 0.0795843   | BGIOSGA037981 | XP_002451101.2putative disease resistance RPP13-like protein 2                         |
| TCONS_00013129 | -0.695936 | -0.960951  | -0.432392   | BGIOSGA020596 | XP_004981867.1GATA transcription factor 19                                             |
| TCONS_00006140 | -0.695833 | -0.902318  | -0.818367   | BGIOSGA008298 | XP_015688836.1 RNA pseudouridine synthase 7                                            |
| TCONS_00012595 | -0.695777 | 0.8496     | -0.156585   | BGIOSGA023918 | XP_006659162.1 40S ribosomal protein S3-3                                              |
| TCONS_00002940 | -0.695712 | -1.67327   | -0.508001   | BGIOSGA010192 | XP_021312743.1protein kinase PINOID 2                                                  |
| TCONS_00011401 | -0.695652 | -1.26822   | -0.00599613 | BGIOSGA025660 | XP_015690188.1PREDICTED: uncharacterized protein LOC102704689 isoform X2               |
| TCONS_00021760 | -0.695506 | 0.362097   | -1.42605    | BGIOSGA036186 | XP_002437987.1UDP-glycosyltransferase 73B4                                             |
| TCONS_00008967 | -0.69549  | -1.67355   | -0.203695   | BGIOSGA005437 | XP_006648047.2 pentatricopeptide repeat-containing protein At5g27460                   |
| TCONS_00018218 | -0.695441 | -1.07813   | -1.06468    | BGIOSGA001353 | XP_006654716.1PREDICTED: uncharacterized protein LOC102700993 isoform X3               |
| TCONS_00030704 | -0.695307 | 0.112819   | -1.18143    | BGIOSGA034891 | XP_022685043.1serine/threonine-protein kinase-like protein At1g28390                   |
| TCONS_00010438 | -0.695202 | -1.90682   | -0.673766   | BGIOSGA013030 | XP_006650301.1 probable cytokinin riboside 5'-monophosphate phosphoribohydrolase LOGL5 |
| TCONS_00023165 | -0.694798 | 1.78569    | -0.277169   | BGIOSGA025203 | XP_006657474.1 nucleolar protein 58-like                                               |
| TCONS_00029039 | -0.694264 | -0.915869  | -0.85273    | BGIOSGA004301 | XP_006644589.1 glycyIpeptide N-tetradecanoyltransferase 1                              |
| TCONS_00016541 | -0.693834 | -0.947959  | -1.03527    | BGIOSGA016114 | XP_006653729.1 wall-associated receptor kinase 3-like                                  |
| TCONS_00011486 | -0.693296 | -1.76257   | -0.739945   | BGIOSGA011540 | NP_001148819.1cell growth defect factor 2                                              |
| TCONS_00037511 | -0.693108 | 0.577768   | 1.79758     | BGIOSGA024833 | XP_006664735.1 DEAD-box ATP-dependent RNA helicase 9                                   |
| TCONS_00011285 | -0.692919 | -0.555977  | 1.09205     | BGIOSGA013888 | XP_015691179.1 electron transfer flavoprotein subunit alpha, mitochondrial             |
| TCONS_00024487 | -0.692675 | -0.0246661 | 0.198265    | BGIOSGA006781 | XP_008780672.2PREDICTED: uncharacterized protein LOC103700519, partial                 |
| TCONS_00023650 | -0.692668 | -0.278154  | -0.0191491  | BGIOSGA025674 | XP_006657685.2 protein GRIP isoform X1                                                 |
| TCONS_00013376 | -0.692533 | -0.4489    | -0.637912   | BGIOSGA000279 | XP_022679087.1DEAD-box ATP-dependent RNA helicase 37                                   |
| TCONS_00036092 | -0.692434 | -0.314069  | 0.824962    | BGIOSGA037455 | XP_015698800.1 protein TRIGALACTOSYLDIACYLGLYCEROL 5, chloroplastic-like               |
| TCONS_00008697 | -0.691621 | -1.35996   | -0.218203   | BGIOSGA024411 | XP_015689348.1 fatty acid desaturase DES2                                              |
| TCONS_00007791 | -0.691261 | -0.623444  | -1.2882     | BGIOSGA006691 | XP_006647168.1PREDICTED: uncharacterized protein LOC102702532                          |

transcriptome

|                |           |            |            |               |                                                                                                         |
|----------------|-----------|------------|------------|---------------|---------------------------------------------------------------------------------------------------------|
| TCONS_00016619 | -0.690886 | -0.838015  | -0.0606923 | BGIOSGA018413 | XP_006653769.1 probable LRR receptor-like serine/threonine-protein kinase At1g56140                     |
| TCONS_00036804 | -0.690655 | 1.05802    | -0.43295   | BGIOSGA010359 | XP_015698780.1 leucine-rich repeat receptor-like tyrosine-protein kinase PXC3                           |
| TCONS_00007207 | -0.690509 | -0.959183  | -1.51687   | #N/A          | #N/A                                                                                                    |
| TCONS_00010392 | -0.690343 | -0.850751  | 0.828726   | BGIOSGA012986 | XP_006650251.1PREDICTED: uncharacterized protein LOC102713610                                           |
| TCONS_00016163 | -0.690266 | -0.0303907 | 0.695342   | BGIOSGA016881 | XP_015698088.1 dnaJ protein homolog                                                                     |
| TCONS_00005027 | -0.690064 | -0.0985767 | 0.987268   | BGIOSGA000191 | XP_002459034.1thiamine pyrophosphokinase 1 isoform X1                                                   |
| TCONS_00036578 | -0.690064 | -0.957221  | -0.552097  | BGIOSGA034600 | XP_015698575.1 protein LURP-one-related 8-like                                                          |
| TCONS_00013564 | -0.690036 | -1.0173    | -0.520857  | BGIOSGA008700 | XP_006650922.1 probable xyloglucan endotransglucosylase/hydrolase protein 30                            |
| TCONS_00035782 | -0.689999 | -1.23052   | -0.0459505 | BGIOSGA019250 | XP_006662491.1 NAD-dependent malic enzyme 59 kDa isoform, mitochondrial                                 |
| TCONS_00027140 | -0.689944 | -0.28733   | -0.152372  | BGIOSGA038407 | XP_006659691.1 60S ribosomal protein L10a                                                               |
| TCONS_00003897 | -0.689856 | 0.687579   | 1.08728    | BGIOSGA034270 | XP_003569281.1probable serine/threonine-protein kinase PIX7                                             |
| TCONS_00010735 | -0.689851 | -1.43556   | -1.5985    | BGIOSGA000718 | XP_006650423.1 inositol hexakisphosphate and diphosphoinositol-pentakisphosphate kinase-like isoform X1 |
| TCONS_00012706 | -0.68982  | -1.05706   | -0.289672  | BGIOSGA010260 | XP_010025208.1 putative protease Do-like 14                                                             |
| TCONS_00014987 | -0.689742 | 0.344935   | -0.552901  | BGIOSGA011960 | XP_006652855.1 polyadenylate-binding protein RBP45-like                                                 |
| TCONS_00013248 | -0.689244 | 0.901007   | 0.366826   | BGIOSGA004136 | XP_006651859.2 probable LRR receptor-like serine/threonine-protein kinase At2g16250                     |
| TCONS_00012593 | -0.688801 | -0.0988414 | -0.510768  | BGIOSGA027602 | XP_006659160.1 60S ribosomal protein L13-1                                                              |
| TCONS_00021392 | -0.688484 | -0.378335  | -0.216579  | BGIOSGA033658 | XP_003571225.1uncharacterized protein LOC106866486                                                      |
| TCONS_00005077 | -0.687925 | -0.281851  | -0.656963  | BGIOSGA028215 | XP_006645316.1 glucan endo-1,3-beta-glucosidase Gll-like                                                |
| TCONS_00025569 | -0.687768 | 1.65655    | 0.342648   | BGIOSGA022508 | XP_004958408.1transcription factor MYB30                                                                |
| TCONS_00014156 | -0.687144 | 0.539635   | -0.074545  | BGIOSGA016310 | XP_002436358.1dolichyl-diphosphooligosaccharide--protein glycosyltransferase subunit DAD1               |
| TCONS_00031071 | -0.687024 | -3.86795   | -4.27391   | BGIOSGA037494 | XP_010234705.1protein PHYTOCHROME KINASE SUBSTRATE 1                                                    |
| TCONS_00001874 | -0.686991 | 1.08621    | 1.85529    | BGIOSGA004507 | XP_020405458.1uncharacterized LOC100382829 isoform X1                                                   |
| TCONS_00030960 | -0.686712 | -1.20054   | -0.373772  | BGIOSGA010538 | XP_015694452.1 probable galacturonosyltransferase 3 isoform X2                                          |
| TCONS_00033132 | -0.686705 | 0.411367   | -0.411657  | BGIOSGA025495 | XP_006663272.1 lipase-like PAD4                                                                         |
| TCONS_00030703 | -0.68654  | 0.038332   | -0.380289  | BGIOSGA032294 | XP_003572032.1F-box/LRR-repeat protein At2g43260-like                                                   |
| TCONS_00016130 | -0.686476 | 0.0632604  | 0.411611   | BGIOSGA023609 | XP_004976006.1elongator complex protein 3                                                               |
| TCONS_00016814 | -0.686446 | 0.506364   | -0.767546  | BGIOSGA030954 | XP_008661900.1transfactor isoform X2                                                                    |
| TCONS_00032615 | -0.686149 | -1.54675   | -0.841742  | BGIOSGA031497 | XP_015697435.1 probable RNA-binding protein 18                                                          |
| TCONS_00014905 | -0.686071 | -0.0848765 | 0.268051   | BGIOSGA017087 | XP_015691570.1PREDICTED: LOW QUALITY PROTEIN: uncharacterized protein LOC102711153                      |
| TCONS_00013312 | -0.685367 | 0.78567    | 0.520812   | BGIOSGA025523 | XP_006650706.1 probable aldehyde oxidase 2                                                              |
| TCONS_00000480 | -0.685282 | -1.34328   | -0.944003  | BGIOSGA026880 | XP_002457084.2cytochrome P450 71A1                                                                      |
| TCONS_00007046 | -0.685134 | -0.226468  | -1.0118    | BGIOSGA007045 | XP_015688907.1 putative clathrin assembly protein At5g35200                                             |
| TCONS_00034383 | -0.685088 | -1.44717   | -1.57322   | BGIOSGA033955 | XP_006662768.1 CBS domain-containing protein CBSCBSP3-like                                              |
| TCONS_00023026 | -0.685069 | -1.41157   | 0.239455   | BGIOSGA025627 | XP_004955370.1transcription factor NIGTH1                                                               |
| TCONS_00023772 | -0.684478 | -1.36865   | -2.25045   | BGIOSGA025812 | XP_006658614.1 condensin-2 complex subunit H2                                                           |
| TCONS_00006947 | -0.684319 | -0.239079  | -0.585713  | BGIOSGA021701 | XP_006647986.1 probable cyclic nucleotide-gated ion channel 20, chloroplast                             |
| TCONS_00005683 | -0.684226 | -0.887194  | -0.94054   | BGIOSGA021001 | XP_006647077.1 elongation factor 1-gamma 2                                                              |
| TCONS_00001491 | -0.684219 | -0.500433  | -0.197417  | BGIOSGA004132 | XP_006644453.1 actin-related protein 2/3 complex subunit 2A                                             |
| TCONS_00002690 | -0.68406  | -0.0676742 | -0.0278865 | BGIOSGA003623 | XP_006644461.1PREDICTED: uncharacterized protein LOC102713683                                           |
| TCONS_00007927 | -0.683898 | 0.313751   | -0.432869  | BGIOSGA006765 | XP_006647232.1 SNAP25 homologous protein SNAP33-like                                                    |
| TCONS_00003043 | -0.683882 | 2.27785    | 0.654969   | BGIOSGA018619 | XP_003565474.1flocculation protein FLO11                                                                |
| TCONS_00011926 | -0.683824 | 1.03363    | -1.53342   | #N/A          | #N/A                                                                                                    |
| TCONS_00000486 | -0.683757 | 0.174222   | 0.690933   | BGIOSGA007951 | XP_006643942.1 target of Myb protein 1-like                                                             |
| TCONS_00032380 | -0.683682 | 0.0926766  | -0.0361925 | BGIOSGA033210 | XP_006661840.1 WD repeat-containing protein 70                                                          |
| TCONS_00000710 | -0.68339  | -0.844516  | -0.282561  | BGIOSGA003313 | XP_006644087.1 squamosa promoter-binding-like protein 1 isoform X2                                      |
| TCONS_00018432 | -0.68327  | -0.550457  | -1.08785   | BGIOSGA020487 | NP_001151864.1CCT motif family protein                                                                  |
| TCONS_00005617 | -0.683009 | -0.898584  | -0.704125  | BGIOSGA027823 | XP_006647021.2 zinc transporter ZIP12                                                                   |
| TCONS_00017140 | -0.682981 | -0.244137  | -0.0856749 | BGIOSGA022823 | XP_015693070.1 probable chromatin-remodeling complex ATPase chain                                       |
| TCONS_00031728 | -0.68285  | -0.820803  | -1.05102   | BGIOSGA031434 | XP_015697434.1 protein NRT1/ PTR FAMILY 8.3-like isoform X2                                             |
| TCONS_00016900 | -0.682715 | -0.781232  | -1.72402   | BGIOSGA016161 | XP_008656972.1oxalate--CoA ligase isoform X2                                                            |
| TCONS_00023439 | -0.682553 | #N/A       | -2.12149   | #N/A          | #N/A                                                                                                    |
| TCONS_00009044 | -0.68214  | -0.853598  | -0.770893  | BGIOSGA005361 | XP_006648117.1 actin-related protein 2/3 complex subunit 1B-like                                        |
| TCONS_00009184 | -0.68193  | 0.549352   | 1.32965    | BGIOSGA011712 | XP_015689743.1 mitochondrial inner membrane protein OXA1-like                                           |
| TCONS_00007041 | -0.681803 | -0.968513  | -1.12344   | #N/A          | #N/A                                                                                                    |
| TCONS_00025432 | -0.680999 | -1.08944   | -0.842815  | BGIOSGA023996 | XP_003562794.1protein EFFECTOR OF TRANSCRIPTION 2                                                       |
| TCONS_00005490 | -0.680869 | -0.119576  | -0.743523  | BGIOSGA022468 | XP_006646917.1 auxin response factor 6                                                                  |

transcriptome

|                |           |            |            |               |                                                                                                        |
|----------------|-----------|------------|------------|---------------|--------------------------------------------------------------------------------------------------------|
| TCONS_00009500 | -0.680831 | -1.29378   | -0.310083  | BGIOSGA012050 | XP_006649566.1 J domain-containing protein required for chloroplast accumulation response 1 isoform X2 |
| TCONS_00029549 | -0.680785 | 0.0313205  | -1.2212    | BGIOSGA003264 | XP_006661007.1 probable anion transporter 4, chloroplastic                                             |
| TCONS_00009045 | -0.680763 | -0.941055  | -0.707792  | BGIOSGA004190 | XP_006648119.1 auxin-responsive protein IAA10 isoform X1                                               |
| TCONS_00018693 | -0.680528 | -0.796366  | -0.393455  | BGIOSGA008656 | XP_006655034.1 uncharacterized membrane protein At1g06890-like                                         |
| TCONS_00016985 | -0.679818 | -0.867277  | -0.653483  | BGIOSGA019033 | XP_015692894.1 PREDICTED: uncharacterized protein LOC107304226                                         |
| TCONS_00025966 | -0.679624 | -0.096882  | -1.2448    | BGIOSGA004431 | XP_020400588.1 uncharacterized protein LOC100278423 isoform X1                                         |
| TCONS_00012271 | -0.679574 | -0.554805  | -0.510419  | #N/A          | #N/A                                                                                                   |
| TCONS_00011596 | -0.679091 | -0.596559  | -1.45481   | BGIOSGA009625 | XP_015691283.1 ABC transporter G family member 22-like isoform X1                                      |
| TCONS_00008299 | -0.678983 | -0.528321  | 0.0664274  | BGIOSGA006129 | XP_006647449.1 PREDICTED: uncharacterized protein LOC102715451                                         |
| TCONS_00000514 | -0.678749 | -0.502326  | 0.169414   | BGIOSGA003088 | XP_002457057.1 heme-binding protein 2                                                                  |
| TCONS_00018614 | -0.67848  | 0.0671065  | 0.658256   | BGIOSGA018820 | XP_015692814.1 E3 ubiquitin-protein ligase SIS3 isoform X2                                             |
| TCONS_00026034 | -0.678437 | 0.6385     | -1.07025   | BGIOSGA017826 | XP_004972697.1 homeobox-leucine zipper protein ROC1                                                    |
| TCONS_00022286 | -0.678391 | -0.61073   | -0.244764  | BGIOSGA020524 | XP_006656104.1 G-type lectin S-receptor-like serine/threonine-protein kinase SD2-5                     |
| TCONS_00010906 | -0.678373 | -0.287737  | -1.28493   | BGIOSGA009837 | XP_004981852.1 ATP synthase delta chain, chloroplastic                                                 |
| TCONS_00022316 | -0.678346 | -2.90447   | -0.793726  | BGIOSGA007918 | XP_006656116.2 PREDICTED: uncharacterized protein At5g41620-like                                       |
| TCONS_00010955 | -0.678164 | 0.0892042  | -0.61129   | BGIOSGA013556 | XP_006650584.1 PHD finger protein ING2 isoform X2                                                      |
| TCONS_00025863 | -0.677858 | -0.235786  | -1.13343   | BGIOSGA019301 | XP_006659090.1 PREDICTED: uncharacterized protein LOC102703418                                         |
| TCONS_00000117 | -0.677713 | -1.71409   | -2.43868   | BGIOSGA002690 | XP_006645453.1 multicopper oxidase LPR1-like                                                           |
| TCONS_00019985 | -0.677693 | -0.0406115 | 0.153254   | BGIOSGA022171 | XP_006655705.1 5'-methylthioadenosine/S-adenosylhomocysteine nucleosidase 2-like                       |
| TCONS_00013574 | -0.677027 | #N/A       | -1.55057   | BGIOSGA030041 | XP_006652046.1 PREDICTED: uncharacterized protein LOC102714724                                         |
| TCONS_00020321 | -0.676978 | -1.95421   | -0.897281  | BGIOSGA005507 | XP_004964928.1 kinesin-like protein KIN-7D, chloroplastic isoform X1                                   |
| TCONS_00018514 | -0.676923 | 0.312728   | -0.944513  | BGIOSGA018921 | NP_001150247.1 glycine-rich protein A3                                                                 |
| TCONS_00015927 | -0.676846 | -0.402178  | 0.507542   | BGIOSGA006261 | XP_015691463.1 mitogen-activated protein kinase kinase kinase YODA-like                                |
| TCONS_00035491 | -0.676828 | 0.248905   | -0.9674    | BGIOSGA006948 | NP_001168484.1 protein SCARECROW                                                                       |
| TCONS_00027367 | -0.676803 | -0.776892  | -0.888748  | BGIOSGA010945 | XP_003573480.1 protein NRT1/ PTR FAMILY 6.3                                                            |
| TCONS_00001267 | -0.676787 | -1.26882   | -1.73977   | BGIOSGA034661 | XP_015695087.1 probable strigolactone esterase DAD2                                                    |
| TCONS_00010112 | -0.676762 | 0.163562   | 0.185726   | #N/A          | #N/A                                                                                                   |
| TCONS_00005636 | -0.676701 | -0.883027  | 0.15504    | BGIOSGA012839 | XP_003571443.1 SPX domain-containing protein 1                                                         |
| TCONS_00010380 | -0.676115 | -3.78174   | -1.64723   | BGIOSGA025868 | XP_006650248.1 receptor-like serine/threonine-protein kinase SD1-8                                     |
| TCONS_00029159 | -0.676007 | -1.13463   | -0.5122    | BGIOSGA030911 | XP_006660702.1 calmodulin-like protein 1                                                               |
| TCONS_00013894 | -0.67582  | 1.2059     | 1.62857    | BGIOSGA033968 | XP_006663461.1 putative disease resistance RPP13-like protein 1                                        |
| TCONS_00004724 | -0.675794 | -1.79416   | -1.26054   | BGIOSGA031494 | XP_015688150.1 BEL1-like homeodomain protein 9                                                         |
| TCONS_00021222 | -0.675781 | -0.731348  | -0.0489727 | BGIOSGA023443 | XP_006657238.1 peptidyl-prolyl cis-trans isomerase CYP59                                               |
| TCONS_00008078 | -0.675391 | -1.13096   | -2.10374   | BGIOSGA006372 | XP_015689629.1 probable magnesium transporter NIPA8                                                    |
| TCONS_00014668 | -0.675184 | -0.602884  | -0.844281  | BGIOSGA014156 | XP_003580229.1 beta-fructofuranosidase 1                                                               |
| TCONS_00009419 | -0.675159 | 0.898629   | 0.036934   | BGIOSGA011972 | XP_006649494.1 elongation factor 1-alpha                                                               |
| TCONS_00005213 | -0.674851 | -2.26928   | -4.2246    | BGIOSGA008154 | XP_006648199.2 GDSL esterase/lipase EXL3-like                                                          |
| TCONS_00020701 | -0.674753 | -2.40889   | -3.00786   | BGIOSGA040503 | NP_001144651.1 uncharacterized LOC100277676                                                            |
| TCONS_00016167 | -0.674496 | -1.76046   | 1.20057    | BGIOSGA008588 | XP_006652461.1 PREDICTED: uncharacterized protein LOC102713263                                         |
| TCONS_00036643 | -0.67399  | 0.344906   | 1.10469    | BGIOSGA034531 | XP_006664849.1 mitochondrial acidic protein MAM33                                                      |
| TCONS_00031214 | -0.673697 | 0.342845   | -0.232268  | BGIOSGA013750 | XP_006661799.2 ABC transporter G family member 28-like                                                 |
| TCONS_00001450 | -0.673496 | -0.340083  | 0.876556   | BGIOSGA025813 | XP_015693815.1 AAA-ATPase At3g50940-like isoform X1                                                    |
| TCONS_00027071 | -0.673464 | -1.41051   | -0.426087  | BGIOSGA029396 | XP_015696047.1 GTPase-activating protein gyp7-like                                                     |
| TCONS_00020566 | -0.673224 | -0.598889  | -0.184833  | BGIOSGA022744 | XP_006656030.1 formin-binding protein 4 isoform X2                                                     |
| TCONS_00021488 | -0.673189 | -0.317749  | -0.364031  | BGIOSGA030428 | XP_002437714.1 uncharacterized membrane protein At1g75140                                              |
| TCONS_00016395 | -0.673134 | -2.12286   | -2.93039   | BGIOSGA026759 | XP_006652626.1 cis-zeatin O-glucosyltransferase 1-like                                                 |
| TCONS_00033916 | -0.672737 | -1.47283   | -0.729909  | BGIOSGA032285 | XP_015697728.1 F-box/LRR-repeat protein 4-like                                                         |
| TCONS_00012373 | -0.672479 | -0.756349  | -1.5621    | BGIOSGA034236 | XP_003561581.1 copper-transporting ATPase PAA1, chloroplastic isoform X2                               |
| TCONS_00014785 | -0.672352 | 0.798697   | 0.752372   | BGIOSGA004637 | XP_006652670.1 cytochrome P450 704C1-like                                                              |
| TCONS_00028958 | -0.671972 | -0.242366  | -0.563388  | #N/A          | #N/A                                                                                                   |
| TCONS_00036091 | -0.671905 | -0.537627  | -0.183216  | BGIOSGA004722 | XP_006664581.2 probable WRKY transcription factor 3                                                    |
| TCONS_00024844 | -0.671176 | 0.242783   | -0.197096  | BGIOSGA024529 | XP_006652114.1 PREDICTED: uncharacterized protein KIAA0930 homolog                                     |
| TCONS_00034215 | -0.671689 | -1.78007   | -2.07297   | BGIOSGA030934 | XP_006663775.2 protein DETOXIFICATION 21-like isoform X1                                               |

transcriptome

|                |           |            |            |               |                                                                                                  |
|----------------|-----------|------------|------------|---------------|--------------------------------------------------------------------------------------------------|
| TCONS_00025990 | -0.67168  | -0.124182  | -0.621169  | BGIOSGA037204 | XP_004979650.1 putative disease resistance protein At1g50180                                     |
| TCONS_00014147 | -0.671649 | -0.757317  | -0.827243  | BGIOSGA021885 | XP_003579655.1 glycerophosphodiester phosphodiesterase GDPD2                                     |
| TCONS_00037608 | -0.671164 | -0.369794  | -0.250199  | BGIOSGA017996 | XP_006664784.2 protein NRT1/ PTR FAMILY 2.11-like                                                |
| TCONS_00018773 | -0.671131 | 0.406677   | -0.956735  | BGIOSGA026934 | XP_015692935.1 NAC domain-containing protein 73-like isoform X2                                  |
| TCONS_00021927 | -0.671038 | -1.98043   | -3.15072   | BGIOSGA004442 | XP_015693214.1 pseudo histidine-containing phosphotransfer protein 5                             |
| TCONS_00031474 | -0.67095  | -0.136693  | 0.135926   | BGIOSGA019185 | XP_022681533.1 uncharacterized protein LOC101778128 isoform X2                                   |
| TCONS_00022815 | -0.670864 | -2.21778   | -3.30365   | BGIOSGA001741 | XP_006657280.1 IAA-amino acid hydrolase ILR1-like 6                                              |
| TCONS_00013138 | -0.670737 | -1.21397   | 0.180947   | BGIOSGA009847 | XP_006650556.1 CBS domain-containing protein CBSX3, mitochondrial                                |
| TCONS_00022902 | -0.670454 | -0.343769  | -1.024     | BGIOSGA020541 | XP_006657342.1 UPF0183 protein At3g51130 NP_001304792.1 uncharacterized LOC100839725             |
| TCONS_00031912 | -0.670375 | -0.207807  | -0.406071  | BGIOSGA032230 | XP_003559356.1 zinc finger protein GIS                                                           |
| TCONS_00013289 | -0.669953 | -1.96259   | -2.10347   | BGIOSGA000019 | XP_006662832.2 PREDICTED: uncharacterized protein At4g06598-like                                 |
| TCONS_00033179 | -0.669742 | -0.371956  | -0.629223  | BGIOSGA037126 | XP_002463811.1 putative S-adenosyl-L-methionine-dependent methyltransferase Mvan_0910 isoform X4 |
| TCONS_00013255 | -0.669567 | -1.90672   | -3.53427   | BGIOSGA009733 | XP_006651346.1 PREDICTED: uncharacterized protein LOC102714000                                   |
| TCONS_00012212 | -0.669439 | 0.339584   | -0.83285   | BGIOSGA010796 | XP_006663963.1 serine/threonine-protein kinase tricornet-like                                    |
| TCONS_00035883 | -0.669006 | -0.495833  | -0.225033  | BGIOSGA002235 | XP_006657913.1 probable serine/threonine-protein kinase At1g54610 isoform X1                     |
| TCONS_00025462 | -0.668961 | 0.135539   | 0.219051   | BGIOSGA026350 | XP_004974538.1 senescence-specific cysteine protease SAG39                                       |
| TCONS_00013783 | -0.668953 | -1.40752   | 0.0688341  | BGIOSGA001216 | XP_008676865.1 putative mase H family protein isoform X4                                         |
| TCONS_00027459 | -0.668802 | -0.19621   | -0.166006  | BGIOSGA037091 | XP_015688434.1 PREDICTED: uncharacterized protein LOC102710761                                   |
| TCONS_00007259 | -0.668778 | -1.03303   | -1.2735    | BGIOSGA007223 | XP_006655582.1 phenylalanine-tRNA ligase beta subunit, cytoplasmic                               |
| TCONS_00034824 | -0.668642 | -0.295258  | -0.934398  | #N/A          | #N/A                                                                                             |
| TCONS_00018291 | -0.66858  | -0.0890478 | 0.141286   | BGIOSGA020344 | XP_015691299.1 WD repeat-containing protein 43                                                   |
| TCONS_00009882 | -0.668186 | 0.796638   | 0.631589   | BGIOSGA004612 | XP_003558255.1 uncharacterized protein LOC100836685                                              |
| TCONS_00009756 | -0.668149 | 0.131398   | -1.97703   | BGIOSGA031552 | XP_022679979.1 uncharacterized protein LOC111256358                                              |
| TCONS_00007208 | -0.668132 | 0.744394   | -0.167668  | BGIOSGA011129 | XP_006659901.1 probable disease resistance protein RXW24L                                        |
| TCONS_00027486 | -0.667734 | -1.86916   | -1.36527   | BGIOSGA008383 | XP_008649239.2 nascent polypeptide-associated complex subunit alpha, muscle-specific form        |
| TCONS_00020358 | -0.66764  | 0.646676   | -0.398368  | BGIOSGA021834 | #N/A                                                                                             |
| TCONS_00034292 | -0.667366 | -1.57497   | -0.821757  | #N/A          | #N/A                                                                                             |
| TCONS_00008573 | -0.667114 | 0.632757   | -0.438352  | BGIOSGA014527 | XP_006647677.1 homeobox-leucine zipper protein ROC5                                              |
| TCONS_00008338 | -0.666829 | -1.65074   | -0.982887  | BGIOSGA024890 | XP_015689002.1 chitinase 6 isoform X1                                                            |
| TCONS_00018271 | -0.66672  | -0.658262  | 0.413799   | BGIOSGA001010 | XP_015692727.1 protein DETOXIFICATION 14-like isoform X1                                         |
| TCONS_00025128 | -0.666401 | 0.122698   | 0.774011   | BGIOSGA024276 | XP_006658571.1 PREDICTED: uncharacterized protein LOC102722974                                   |
| TCONS_00005350 | -0.665784 | -0.732581  | -1.4034    | BGIOSGA007459 | XP_015688444.1 PREDICTED: uncharacterized protein LOC102718805, partial                          |
| TCONS_00033730 | -0.665767 | 0.488114   | 0.697358   | BGIOSGA037750 | XP_006662999.1 protein ROOT HAIR DEFECTIVE 3 homolog 2                                           |
| TCONS_00003396 | -0.665375 | 0.235007   | -0.165018  | BGIOSGA021400 | XP_004982036.1 protein FAF-like, chloroplastic isoform X1                                        |
| TCONS_00030568 | -0.665375 | 1.23501    | -2.16502   | BGIOSGA030654 | XP_006661009.1 ACT domain-containing protein ACR10                                               |
| TCONS_00002209 | -0.665202 | -1.24689   | -0.292181  | BGIOSGA030800 | XP_006645060.1 glucan endo-1,3-beta-glucosidase 14-like                                          |
| TCONS_00030607 | -0.664243 | -0.305891  | -1.09934   | BGIOSGA012197 | XP_002467392.1 probable NAD(P)H-dependent oxidoreductase 1                                       |
| TCONS_00025596 | -0.664127 | 0.513535   | -0.360788  | BGIOSGA023837 | XP_015695129.1 thymidylate kinase                                                                |
| TCONS_00008838 | -0.664017 | 0.326113   | -0.0202045 | BGIOSGA018572 | XP_006647942.1 universal stress protein SII1388                                                  |
| TCONS_00015502 | -0.663782 | -3.64485   | -1.247     | BGIOSGA010570 | XP_006652128.1 sucrose synthase 7                                                                |
| TCONS_00025380 | -0.66361  | -0.945771  | -0.752152  | BGIOSGA024052 | XP_006657865.2 protein TIME FOR COFFEE                                                           |
| TCONS_00002313 | -0.663428 | -0.98985   | -3.16989   | BGIOSGA011445 | XP_004970852.1 LOB domain-containing protein 6                                                   |
| TCONS_00011781 | -0.663135 | -1.70531   | -1.20121   | BGIOSGA035949 | XP_004985228.1 probable galacturonosyltransferase 14                                             |
| TCONS_00030091 | -0.662784 | -1.06279   | -1.95627   | BGIOSGA035936 | XP_015696647.1 zinc finger protein 2-like                                                        |
| TCONS_00037165 | -0.662565 | -0.62837   | -0.809472  | BGIOSGA016997 | XP_015698295.1 bidirectional sugar transporter SWEET13-like                                      |
| TCONS_00018107 | -0.662464 | 0.0522998  | 0.177616   | BGIOSGA020162 | XP_006654628.2 ubiquitin carboxyl-terminal hydrolase 25                                          |
| TCONS_00025768 | -0.662326 | -1.36901   | -0.880621  | BGIOSGA027830 | XP_006659725.1 protein odr-4 homolog                                                             |
| TCONS_00025701 | -0.661766 | 0.329979   | 1.34953    | BGIOSGA021572 | XP_006658128.1 peroxidase P7-like                                                                |
| TCONS_00015264 | -0.661642 | -3.57707   | -2.17434   | BGIOSGA033976 | NP_001183315.1 legume lectins beta domain containing protein                                     |
| TCONS_00013349 | -0.661248 | 0.347231   | 0.242414   | BGIOSGA009634 | XP_006650737.1 40S ribosomal protein S15                                                         |
| TCONS_00012282 | -0.660235 | -0.421748  | -0.475929  | BGIOSGA010723 | XP_006650090.1 beta-adaptin-like protein C                                                       |
| TCONS_00027615 | -0.660068 | -1.63322   | -0.896584  | BGIOSGA011034 | XP_006645004.1 probable mannose-1-phosphate guanylyltransferase 3                                |
| TCONS_00019771 | -0.660027 | 0.804602   | 0.143582   | BGIOSGA031285 | XP_006654770.1 ribosomal L1 domain-containing protein 1-like                                     |

## transcriptome

|                |           |              |            |               |                                                                                                    |
|----------------|-----------|--------------|------------|---------------|----------------------------------------------------------------------------------------------------|
| TCONS_00003663 | -0.659866 | -0.354079    | -1.44087   | BGIOSGA001542 | XP_006645936.2 plastidial glycolate/glycerate translocator 1, chloroplastic                        |
| TCONS_00018233 | -0.659833 | 0.0353639    | 1.05958    | BGIOSGA020290 | XP_006654729.1 lys-63-specific deubiquitinase BRCC36-like isoform X1                               |
| TCONS_00027008 | -0.659749 | -1.08028     | -0.123992  | BGIOSGA009879 | XP_006659627.2 PREDICTED: uncharacterized protein LOC102702588 isoform X1                          |
| TCONS_00027256 | -0.659701 | -2.57951     | -1.17915   | BGIOSGA001310 | XP_004972995.1 ACT domain-containing protein ACR8                                                  |
| TCONS_00012130 | -0.659599 | -1.69093     | -2.0699    | BGIOSGA010878 | XP_006651313.2 protein high chlorophyll fluorescent 107                                            |
| TCONS_00013895 | -0.659384 | -0.000435969 | -0.39388   | #N/A          | #N/A                                                                                               |
| TCONS_00017812 | -0.659124 | 0.464157     | 0.906883   | BGIOSGA022123 | XP_006654408.1 glutathione gamma-glutamylcysteinyltransferase 1-like                               |
| TCONS_00012090 | -0.65902  | -0.00275054  | -0.687928  | BGIOSGA001394 | XP_006649932.1 PREDICTED: uncharacterized protein At5g01610-like                                   |
| TCONS_00002497 | -0.658901 | -0.0886644   | -1.18113   | BGIOSGA007803 | XP_006645310.1 cytokinin dehydrogenase 4                                                           |
| TCONS_00008183 | -0.658629 | 0.287037     | -1.41627   | BGIOSGA015045 | XP_006647375.1 DDT domain-containing protein DDB_G0282237-like                                     |
| TCONS_00005155 | -0.658388 | -0.628232    | -2.01987   | BGIOSGA000049 | XP_015695364.1 PREDICTED: uncharacterized protein LOC102722642                                     |
| TCONS_00002298 | -0.658374 | -2.22099     | -1.4133    | BGIOSGA004937 | XP_006646543.1 abhydrolase domain-containing protein C22H12.03                                     |
| TCONS_00019836 | -0.658355 | 1.1813       | 0.276954   | BGIOSGA020396 | XP_006654818.1 CTP synthase-like isoform X2                                                        |
| TCONS_00030046 | -0.658124 | -0.929416    | -0.990403  | BGIOSGA020219 | XP_006660625.1 ATP-dependent 6-phosphofructokinase 5, chloroplastic-like                           |
| TCONS_00003278 | -0.658042 | -0.244532    | -0.0306399 | BGIOSGA001937 | XP_015688147.1 PREDICTED: uncharacterized protein LOC102722266                                     |
| TCONS_00023856 | -0.657926 | -0.98589     | -0.942528  | BGIOSGA027694 | XP_006658657.1 putative receptor-like protein kinase At4g00960                                     |
| TCONS_00016888 | -0.65778  | -0.412       | -0.540041  | BGIOSGA014077 | XP_006653038.1 choline transporter-like protein 2                                                  |
| TCONS_00002035 | -0.657652 | 0.31408      | 0.121597   | BGIOSGA034571 | XP_015688272.1 histone-lysine N-methyltransferase, H3 lysine-9 specific SUVH1-like                 |
| TCONS_00032528 | -0.657505 | -1.01152     | -0.896995  | BGIOSGA031586 | XP_006662498.1 SET and MYND domain-containing protein 4                                            |
| TCONS_00029621 | -0.656595 | -0.480308    | -2.47653   | BGIOSGA020422 | XP_006661038.1 cinnamoyl-CoA reductase 1-like                                                      |
| TCONS_00033239 | -0.656573 | -0.975095    | -0.60087   | BGIOSGA025398 | XP_010941981.2 tubulin alpha chain NP_001168546.1 putative DUF231 domain containing family protein |
| TCONS_00035438 | -0.656572 | -1.15172     | -0.342745  | BGIOSGA023035 |                                                                                                    |
| TCONS_00003798 | -0.656385 | 0.472618     | -1.3531    | #N/A          | #N/A                                                                                               |
| TCONS_00011972 | -0.65569  | -1.52721     | -1.46358   | BGIOSGA011038 | XP_015690181.1 protein DA1-related 2 isoform X1                                                    |
| TCONS_00025335 | -0.655411 | 1.04801      | -0.840416  | BGIOSGA026500 | XP_006657831.1 sugar transport protein 1-like                                                      |
| TCONS_00012338 | -0.655143 | -0.405326    | 0.202964   | BGIOSGA004037 | XP_003557869.1 protein COP1 SUPPRESSOR 2                                                           |
| TCONS_00007325 | -0.655064 | -0.285768    | -0.0626347 | BGIOSGA007160 | XP_006648297.1 protein arginine N-methyltransferase 5                                              |
| TCONS_00028018 | -0.654772 | -0.690609    | -0.857789  | BGIOSGA009203 | XP_006659398.1 homeobox-leucine zipper protein HOX5-like                                           |
| TCONS_00029435 | -0.654658 | 0.487745     | -0.636975  | BGIOSGA003286 | XP_015696731.1 phospholipase D delta                                                               |
| TCONS_00032202 | -0.654601 | -0.0679213   | -0.31839   | BGIOSGA030138 | XP_008664970.1 phospholipid-transporting ATPase 3 isoform X1                                       |
| TCONS_00036629 | -0.654529 | -0.969331    | -1.39264   | BGIOSGA036677 | XP_006662714.1 protein ZINC INDUCED FACILITATOR-LIKE 1-like isoform X3                             |
| TCONS_00036565 | -0.654086 | -0.722208    | -1.30451   | BGIOSGA008170 | XP_006662678.1 PREDICTED: uncharacterized protein LOC102700746                                     |
| TCONS_00002287 | -0.653817 | -0.592108    | -0.0290418 | #N/A          | #N/A                                                                                               |
| TCONS_00007454 | -0.653698 | -0.870844    | -1.18662   | BGIOSGA036907 | XP_006646963.1 CBL-interacting serine/threonine-protein kinase 21                                  |
| TCONS_00002320 | -0.653619 | -4.51315     | -2.97455   | BGIOSGA020928 | XP_006645151.1 2-alkenal reductase (NADP(+)-dependent)-like                                        |
| TCONS_00009169 | -0.653458 | 0.21472      | -0.0165465 | BGIOSGA011696 | XP_012704294.1 WD repeat-containing protein 6 isoform X1                                           |
| TCONS_00013458 | -0.653355 | -1.25306     | -0.354113  | BGIOSGA011056 | XP_015690133.1 anthranilate synthase alpha subunit 1, chloroplastic                                |
| TCONS_00013520 | -0.652968 | -0.751468    | 0.00421905 | BGIOSGA009460 | XP_006650882.1 poly(ADP-ribose) glycohydrolase 1-like                                              |
| TCONS_00034206 | -0.65285  | -0.862315    | -0.797217  | BGIOSGA036723 | XP_006662812.1 pentatricopeptide repeat-containing protein At4g18975, chloroplastic isoform X2     |
| TCONS_00013628 | -0.652612 | 0.150562     | 0.0990565  | BGIOSGA015778 | XP_006652080.2 G patch domain-containing protein 8                                                 |
| TCONS_00017120 | -0.652377 | 1.02953      | 0.0105877  | BGIOSGA010144 | XP_006654987.2 serine/threonine-protein phosphatase BSL1 homolog                                   |
| TCONS_00007151 | -0.652254 | 0.0517698    | -0.0850635 | BGIOSGA007917 | XP_006649191.1 splicing factor 3B subunit 2                                                        |
| TCONS_00020709 | -0.652254 | -1.44448     | -0.483158  | BGIOSGA022904 | XP_006656969.1 UPF0261 protein RA0729                                                              |
| TCONS_00026391 | -0.651947 | -1.44487     | -1.53122   | BGIOSGA028917 | XP_006660049.2 probable galacturonosyltransferase 4                                                |
| TCONS_00020624 | -0.651753 | -2.12635     | -0.639037  | #N/A          | #N/A                                                                                               |
| TCONS_00026175 | -0.651549 | -4.31226     | -2.90781   | BGIOSGA028248 | XP_003573587.1 endo-1,3;1,4-beta-D-glucanase isoform X1                                            |
| TCONS_00018075 | -0.651435 | -3.91184     | -1.92628   | BGIOSGA021017 | XP_006654605.1 scarecrow-like protein 32                                                           |
| TCONS_00025789 | -0.651029 | -0.139763    | -0.637782  | BGIOSGA027850 | XP_006659032.1 chromatin assembly factor 1 subunit FAS2 homolog                                    |
| TCONS_00009648 | -0.650716 | 0.994145     | -0.290631  | BGIOSGA016495 | XP_006649699.1 glutamate decarboxylase 1-like                                                      |
| TCONS_00016538 | -0.650453 | 0.348307     | 0.471325   | BGIOSGA014430 | NP_001149203.2 seed specific protein Bn15D1B                                                       |
| TCONS_00017095 | -0.64996  | -0.729862    | -0.332276  | BGIOSGA019149 | XP_003568982.1 diacylglycerol O-acyltransferase 3, cytosolic                                       |
| TCONS_00002064 | -0.649502 | -0.302905    | 0.0350021  | BGIOSGA004695 | XP_006644908.1 WUSCHEL-related homeobox 8                                                          |
| TCONS_00008684 | -0.649322 | -0.455064    | -0.0139631 | BGIOSGA003109 | XP_015688712.1 probable L-type lectin-domain containing receptor kinase S.5                        |

## transcriptome

|                |           |             |            |               |                                                                                                       |
|----------------|-----------|-------------|------------|---------------|-------------------------------------------------------------------------------------------------------|
| TCONS_00019767 | -0.649282 | -0.649217   | 0.388167   | BGIOSGA004180 | XP_014754714.1 putative ubiquitin-conjugating enzyme E2 38                                            |
| TCONS_00016245 | -0.649265 | #NA         | -1.48054   | BGIOSGA014730 | XP_006652507.1 actin-related protein 2/3 complex subunit 2B-like isoform X1                           |
| TCONS_00014671 | -0.649263 | -0.477237   | -1.65747   | BGIOSGA020093 | XP_006652581.1 cysteine-rich repeat secretory protein 15-like                                         |
| TCONS_00011786 | -0.649247 | -1.46717    | -0.950066  | BGIOSGA001236 | XP_006649628.1 mitochondrial substrate carrier family protein E                                       |
| TCONS_00029823 | -0.649247 | -0.592701   | -2.65051   | BGIOSGA039286 | XP_006661118.1 UDP-glucose 4-epimerase 4 isoform X1                                                   |
| TCONS_00033702 | -0.649245 | -0.883464   | -0.147727  | BGIOSGA035481 | XP_015697802.1 sialyltransferase-like protein 5 isoform X2                                            |
| TCONS_00036292 | -0.64902  | -0.699852   | -0.335072  | BGIOSGA023244 | XP_006279124.2 pumilio homolog 2                                                                      |
| TCONS_00017325 | -0.648507 | -0.793152   | -0.966874  | BGIOSGA035843 | XP_002439444.1 uncharacterized protein LOC8055740                                                     |
| TCONS_00014380 | -0.648339 | -0.301079   | 0.50848    | BGIOSGA016537 | XP_003579892.1 aldose 1-epimerase                                                                     |
| TCONS_00017490 | -0.648159 | -0.00910744 | 0.594728   | BGIOSGA019557 | XP_006655241.1 U3 small nucleolar RNA-associated protein 25                                           |
| TCONS_00035456 | -0.647941 | -2.03202    | -1.29802   | BGIOSGA030403 | XP_006662689.1 vacuolar protein sorting-associated protein 32 homolog 2-like isoform X3               |
| TCONS_00024218 | -0.647877 | -0.744523   | -0.531131  | BGIOSGA026258 | XP_015694751.1 SAC3 family protein B                                                                  |
| TCONS_00035981 | -0.647739 | -1.97352    | -1.09084   | BGIOSGA000228 | XP_021316803.1 probable kinase CHARK                                                                  |
| TCONS_00029023 | -0.647195 | -1.12212    | -0.420341  | BGIOSGA036929 | XP_006660634.1 PREDICTED: uncharacterized protein LOC102716526                                        |
| TCONS_00001530 | -0.646928 | -0.678987   | -0.629962  | BGIOSGA019167 | XP_006644479.1 mitogen-activated protein kinase 8 isoform X1                                          |
| TCONS_00021364 | -0.646866 | -0.723501   | -0.928569  | BGIOSGA020791 | XP_006656481.1 lysophospholipid acyltransferase LPEAT2                                                |
| TCONS_00027251 | -0.646839 | -2.33273    | -0.631934  | BGIOSGA023467 | XP_015695705.1 beta-1,6-galactosyltransferase GALT31A-like                                            |
| TCONS_00002929 | -0.64648  | -0.411753   | -0.816042  | BGIOSGA035976 | XP_015699198.1 DEAD-box ATP-dependent RNA helicase 14 isoform X2                                      |
| TCONS_00001744 | -0.646329 | -1.01792    | -1.53965   | BGIOSGA004380 | XP_024314621.1 protein SPA1-RELATED 4                                                                 |
| TCONS_00024331 | -0.646163 | -0.776071   | 0.139495   | BGIOSGA009806 | XP_006658108.1 universal stress protein YxiE-like                                                     |
| TCONS_00018488 | -0.646016 | 0.0812701   | 0.549248   | BGIOSGA005279 | XP_015693306.1 E3 ubiquitin-protein ligase XB3                                                        |
| TCONS_00009062 | -0.645901 | -0.137737   | -0.608734  | BGIOSGA004297 | XP_006654725.2 60S ribosomal protein L28-1-like                                                       |
| TCONS_00016613 | -0.645672 | -1.24927    | -1.15683   | BGIOSGA009923 | XP_015692331.1 protein FAR1-RELATED SEQUENCE 5-like                                                   |
| TCONS_00016950 | -0.645665 | -1.17897    | -0.962915  | BGIOSGA005079 | XP_020405759.1 uncharacterized protein LOC100276184                                                   |
| TCONS_00011120 | -0.645619 | -0.258456   | -0.0887166 | BGIOSGA008212 | XP_015690174.1 5'-3' exoribonuclease 4-like                                                           |
| TCONS_00007503 | -0.645491 | -0.0739187  | -0.539613  | BGIOSGA034041 | XP_002453448.1 lycopen beta cyclase, chloroplastic                                                    |
| TCONS_00002641 | -0.645489 | #NA         | -1.16514   | BGIOSGA005282 | XP_015699261.1 glycine-rich RNA-binding protein 2, mitochondrial-like                                 |
| TCONS_00037175 | -0.64532  | 0.577439    | -0.481673  | BGIOSGA001046 | XP_015698650.1 auxin response factor 24 isoform X1                                                    |
| TCONS_00017513 | -0.645198 | 0.0705825   | -0.685856  | BGIOSGA026122 | XP_015693347.1 probable leucine-rich repeat receptor-like protein kinase At5g49770                    |
| TCONS_00022758 | -0.644935 | -1.59857    | -0.507479  | BGIOSGA023452 | XP_015693731.1 PREDICTED: uncharacterized protein LOC107304379                                        |
| TCONS_00035059 | -0.644652 | -1.01352    | -0.807694  | BGIOSGA037794 | XP_010233689.2 wall-associated receptor kinase 2                                                      |
| TCONS_00007657 | -0.644611 | 0.451963    | 0.39012    | BGIOSGA006829 | XP_006647101.1 E3 ubiquitin-protein ligase CCNB1P1 homolog isoform X2                                 |
| TCONS_00029556 | -0.644428 | -0.938654   | -0.778282  | BGIOSGA031320 | XP_006661584.1 protein SCAI isoform X2                                                                |
| TCONS_00009850 | -0.644415 | -2.65774    | -2.14212   | BGIOSGA014428 | XP_020396980.1 mitogen-activated protein kinase kinase kinase 18                                      |
| TCONS_00006132 | -0.644045 | -0.982679   | -0.703667  | BGIOSGA001241 | XP_006647270.2 ATP-binding cassette sub-family F member 1-like                                        |
| TCONS_00032278 | -0.64404  | -0.4124     | -0.171262  | BGIOSGA011896 | XP_015697475.1 protein RRP6-like 2                                                                    |
| TCONS_00028922 | -0.643979 | -0.856413   | -0.215629  | #N/A          | #N/A                                                                                                  |
| TCONS_00011466 | -0.643794 | -0.319587   | -0.781839  | BGIOSGA001841 | XP_004985934.1 peroxidase 5                                                                           |
| TCONS_00029354 | -0.642844 | -0.97888    | -0.971373  | BGIOSGA000531 | XP_006660851.1 ankyrin repeat-containing protein At5g02620-like                                       |
| TCONS_00009286 | -0.642792 | -3.19756    | -2.51173   | BGIOSGA004637 | XP_006649381.2 alkane hydroxylase MAH1-like                                                           |
| TCONS_00028028 | -0.642759 | -0.900502   | -0.775798  | BGIOSGA016375 | XP_003574493.1 U-box domain-containing protein 41                                                     |
| TCONS_00036865 | -0.642407 | -1.23887    | -3.00767   | BGIOSGA002841 | XP_021321650.1 receptor-like protein 12                                                               |
| TCONS_00010258 | -0.642396 | -1.6093     | -2.09846   | BGIOSGA009164 | XP_015690836.1 probable LIM domain-containing serine/threonine-protein kinase DDB_G0287001 isoform X1 |
| TCONS_00015596 | -0.642345 | -0.382298   | 0.242089   | #N/A          | #N/A                                                                                                  |
| TCONS_00030290 | -0.642119 | -0.266202   | -0.892911  | BGIOSGA017636 | XP_006660786.1 chaperone protein dnaJ 10-like                                                         |
| TCONS_00022894 | -0.641826 | -0.239603   | -1.68718   | BGIOSGA009203 | XP_002437580.1 F-box/kelch-repeat protein SKIP25                                                      |
| TCONS_00023299 | -0.641606 | 0.085081    | -1.16889   | BGIOSGA013758 | XP_002459511.1 protein YLS3                                                                           |
| TCONS_00031676 | -0.641546 | -2.1905     | -0.437979  | BGIOSGA033495 | XP_015697290.1 PREDICTED: uncharacterized protein LOC107305141                                        |
| TCONS_00016837 | -0.641506 | -0.226709   | 0.0050453  | BGIOSGA019422 | XP_006652996.1 oryzain beta chain isoform X2                                                          |
| TCONS_00033825 | -0.640767 | -0.0185411  | -0.0117293 | BGIOSGA030618 | XP_006663591.1 pentatricopeptide repeat-containing protein At4g19890                                  |
| TCONS_00002181 | -0.640333 | -1.21071    | -0.806443  | BGIOSGA018756 | XP_015698995.1 coronatine-insensitive protein homolog 1a                                              |
| TCONS_00026024 | -0.640306 | -0.0190545  | -0.474837  | BGIOSGA028096 | XP_006659183.2 histone-lysine N-methyltransferase ATXR3                                               |
| TCONS_00018325 | -0.640067 | -0.15187    | 0.777535   | BGIOSGA020377 | XP_015693320.1 putative rRNA methyltransferase                                                        |
| TCONS_00001802 | -0.639717 | -2.19244    | 1.32296    | #N/A          | #N/A                                                                                                  |
| TCONS_00000641 | -0.63948  | 0.617274    | -0.0149018 | BGIOSGA007044 | XP_006645749.1 alpha-glucosidase YihQ-like                                                            |

## transcriptome

|                |           |             |            |               |                                                                                                                  |
|----------------|-----------|-------------|------------|---------------|------------------------------------------------------------------------------------------------------------------|
| TCONS_00000504 | -0.639476 | -0.893312   | 0.184664   | BGIOSGA030049 | XP_015699227.1 putative ubiquitin-conjugating enzyme E2 38<br>XP_006643998.1 shaggy-related protein kinase alpha |
| TCONS_00000576 | -0.639447 | 0.300071    | -0.601016  | BGIOSGA018612 | XP_006650444.1 probable linoleate 9S-lipoxygenase 4                                                              |
| TCONS_00010768 | -0.639434 | 1.17243     | -0.015014  | BGIOSGA006958 | XP_015696589.1 NAD(P)H-quinone oxidoreductase subunit L, chloroplastic                                           |
| TCONS_00019120 | -0.639358 | -1.02072    | -2.43613   | BGIOSGA005536 | XP_006656002.1 guanine nucleotide-binding protein alpha-1 subunit isoform X1                                     |
| TCONS_00019091 | -0.639048 | -0.6082     | -0.30677   | BGIOSGA018278 | XP_006656416.1 PREDICTED: uncharacterized protein LOC102722587                                                   |
| TCONS_00022830 | -0.639022 | -3.94477    | -2.16592   | BGIOSGA020616 | XP_006660787.1 chitinase-like protein 1                                                                          |
| TCONS_00029274 | -0.638811 | -2.02795    | -2.44625   | BGIOSGA026643 | XP_004970553.1 aspartic proteinase PCS1                                                                          |
| TCONS_00004715 | -0.638799 | -3.86911    | -1.1469    | BGIOSGA011556 | XP_015695274.1 40S ribosomal protein S18                                                                         |
| TCONS_00013329 | -0.63845  | 0.138857    | -0.306297  | BGIOSGA025935 | XP_006646046.1 enolase-phosphatase E1-like                                                                       |
| TCONS_00003894 | -0.638395 | -3.92865    | -0.93896   | BGIOSGA034998 | XP_006650179.1 protein TIFY 10a                                                                                  |
| TCONS_00012427 | -0.638286 | -0.109678   | -0.83616   | BGIOSGA026133 | XP_015694896.1 ninja-family protein Os07g0602900-like                                                            |
| TCONS_00025496 | -0.63817  | -0.174047   | 0.429712   | BGIOSGA020888 | #N/A                                                                                                             |
| TCONS_00026296 | -0.638127 | -0.00910724 | -1.14729   | #N/A          | #N/A                                                                                                             |
| TCONS_00019733 | -0.638062 | 0.878284    | -1.06532   | BGIOSGA029249 | XP_003571225.1 uncharacterized protein LOC106866486                                                              |
| TCONS_00002570 | -0.637974 | -0.109651   | -0.0844368 | BGIOSGA022755 | XP_015688317.1 uncharacterized CRM domain-containing protein At3g25440, chloroplastic                            |
| TCONS_00025718 | -0.63792  | 0.191224    | 0.624985   | BGIOSGA012549 | XP_006658144.1 zinc finger CCHC domain-containing protein 53 isoform X1                                          |
| TCONS_00036288 | -0.63788  | #NA         | -0.885326  | BGIOSGA000018 | XP_008676028.1 uncharacterized protein LOC103652167                                                              |
| TCONS_00005282 | -0.637478 | 0.311382    | -0.135073  | BGIOSGA009690 | XP_006646791.1 probable serine/threonine-protein kinase NAK                                                      |
| TCONS_00027546 | -0.637241 | -2.10762    | -2.24468   | BGIOSGA017116 | XP_015696198.1 probable gamma-aminobutyrate transaminase 3, mitochondrial                                        |
| TCONS_00015124 | -0.637216 | 0.505295    | -0.448931  | BGIOSGA017303 | XP_015691815.1 U11/U12 small nuclear ribonucleoprotein 25 kDa protein                                            |
| TCONS_00009777 | -0.637183 | 0.877175    | 0.602341   | BGIOSGA012329 | XP_015691141.1 palmitoyltransferase ZDHHC17-like isoform X1                                                      |
| TCONS_00020718 | -0.636938 | 0.610906    | -0.350033  | BGIOSGA022914 | XP_006656933.1 phosphomannomutase/phosphoglucosyltransferase                                                     |
| TCONS_00005842 | -0.63693  | 0.681004    | -0.0800081 | BGIOSGA033125 | XP_006647162.1 casein kinase I-like                                                                              |
| TCONS_00026087 | -0.636891 | -0.760623   | -1.20574   | BGIOSGA007605 | XP_015695762.1 putative serine/threonine-protein kinase                                                          |
| TCONS_00029174 | -0.635563 | -1.23178    | 0.276389   | BGIOSGA030922 | XP_006660709.2 patatin-like protein 2                                                                            |
| TCONS_00029657 | -0.635465 | -0.357913   | -0.510007  | BGIOSGA030163 | XP_004956392.2 protein RDM16                                                                                     |
| TCONS_00009798 | -0.635348 | -0.718695   | -1.06487   | BGIOSGA025240 | XP_015689846.1 ankyrin repeat-containing protein At3g12360-like                                                  |
| TCONS_00036162 | -0.635304 | -0.876653   | -0.0957651 | BGIOSGA037518 | XP_008661756.1 uncharacterized LOC100277005 isoform X5                                                           |
| TCONS_00001783 | -0.634958 | -0.0940811  | -0.585092  | BGIOSGA004421 | XP_006644674.1 protein NUCLEAR FUSION DEFECTIVE 6, chloroplastic/mitochondrial                                   |
| TCONS_00000439 | -0.63494  | -1.31168    | -1.32169   | BGIOSGA012010 | XP_004968636.1 transcription factor bHLH30                                                                       |
| TCONS_00031066 | -0.634882 | -0.217985   | -0.635274  | BGIOSGA037290 | XP_006661759.2 PREDICTED: uncharacterized protein LOC102711566, partial                                          |
| TCONS_00022552 | -0.634331 | -2.36665    | -1.32521   | BGIOSGA037065 | XP_004965891.1 uncharacterized protein LOC101776480                                                              |
| TCONS_00022887 | -0.634264 | -0.528239   | -0.408821  | BGIOSGA020557 | XP_015693422.1 uncharacterized zinc finger CCHC domain-containing protein At4g19190                              |
| TCONS_00020002 | -0.634239 | -0.194124   | -0.195066  | BGIOSGA025077 | XP_015694053.1 cyclin-dependent kinase F4-like                                                                   |
| TCONS_00016064 | -0.633978 | -1.12832    | -2.101     | BGIOSGA006154 | XP_006652395.1 small nuclear ribonucleoprotein Sm D1-like                                                        |
| TCONS_00010546 | -0.633914 | -0.379707   | -0.58085   | BGIOSGA013161 | XP_015689978.1 probable E3 ubiquitin-protein ligase ARI1                                                         |
| TCONS_00005927 | -0.633885 | -1.48078    | -0.657261  | BGIOSGA020392 | XP_021318584.1 uncharacterized protein LOC8072962 isoform X4                                                     |
| TCONS_00009472 | -0.633554 | #NA         | -2.78015   | BGIOSGA012020 | XP_015699097.1 L-galactono-1,4-lactone dehydrogenase 2, mitochondrial-like                                       |
| TCONS_00004303 | -0.633172 | 0.518981    | 0.218223   | BGIOSGA001035 | XP_014753726.1 trihelix transcription factor ASIL1                                                               |
| TCONS_00003567 | -0.633022 | 0.396289    | -0.53147   | BGIOSGA007259 | XP_015699215.1 probable chromatin-remodeling complex ATPase chain                                                |
| TCONS_00008278 | -0.632995 | -5.05185    | -3.14291   | BGIOSGA006148 | XP_002455208.1 lecithin-cholesterol acyltransferase-like 1                                                       |
| TCONS_00024944 | -0.632949 | -0.945279   | 0.0344368  | BGIOSGA030034 | XP_006660667.1 transcription initiation factor TFIID subunit 15 isoform X1                                       |
| TCONS_00002796 | -0.632453 | -0.894621   | -0.81535   | BGIOSGA031094 | XP_006643740.1 transcription factor DIVARICATA                                                                   |
| TCONS_00023995 | -0.632152 | -0.0542588  | 0.160366   | BGIOSGA001698 | XP_004958151.1 cell wall protein IFF6                                                                            |
| TCONS_00007568 | -0.632144 | -0.108696   | -0.557554  | BGIOSGA006915 | XP_015689304.1 PREDICTED: uncharacterized protein LOC102711041                                                   |
| TCONS_00005968 | -0.631458 | 0.590823    | 0.172151   | BGIOSGA002716 | XP_006647208.1 PREDICTED: uncharacterized protein LOC102715175                                                   |
| TCONS_00016324 | -0.631058 | -1.42514    | -1.65283   | BGIOSGA019208 | XP_006652585.1 kinesin-like protein NACK1                                                                        |
| TCONS_00000571 | -0.630989 | 0.0428035   | -0.0124558 | BGIOSGA003151 | XP_006643996.2 5'-nucleotidase domain-containing protein 4                                                       |
| TCONS_00006364 | -0.630557 | -1.58286    | -0.964545  | BGIOSGA001469 | XP_006644339.1 serine/threonine-protein phosphatase 7 long form homolog                                          |
| TCONS_00023087 | -0.630496 | -2.35788    | -1.05096   | BGIOSGA010099 | XP_006657432.1 switch-associated protein 70-like                                                                 |
| TCONS_00015755 | -0.630396 | -0.0328974  | 1.29931    | BGIOSGA016224 | XP_008669528.1 dnaJ homolog subfamily C member 2                                                                 |
| TCONS_00013316 | -0.630288 | -0.751181   | -0.0172473 | BGIOSGA019294 | XP_004955561.1 ubiquitin-conjugating enzyme E2 2                                                                 |
| TCONS_00016806 | -0.630249 | 0.108677    | -0.748378  | BGIOSGA014160 | NP_001136882.1 putative TLD family protein                                                                       |
| TCONS_00024330 | -0.629884 | -0.597307   | -0.344386  | BGIOSGA026371 | XP_003562473.1 uncharacterized protein LOC100836840 isoform X2                                                   |

transcriptome

|                |           |           |            |               |                                                                                           |
|----------------|-----------|-----------|------------|---------------|-------------------------------------------------------------------------------------------|
| TCONS_00004566 | -0.629684 | -0.3641   | -0.0617146 | BGIOSGA000649 | XP_012698367.1 disease resistance RPP13-like protein 4 isoform X1                         |
| TCONS_00007987 | -0.629582 | -0.618204 | -0.946788  | BGIOSGA000683 | XP_006648631.2 probable protein phosphatase 2C 14                                         |
| TCONS_00021470 | -0.628812 | 0.683827  | 0.0749332  | BGIOSGA035907 | XP_006655709.1 extra-large guanine nucleotide-binding protein 3-like                      |
| TCONS_00019105 | -0.62796  | -1.11726  | -0.039957  | BGIOSGA018255 | XP_006664953.1 BTB/POZ domain-containing protein At2g30600                                |
| TCONS_00024066 | -0.627761 | -0.607248 | -0.30414   | BGIOSGA007371 | XP_015694718.1 uncharacterized ATP-dependent helicase YprA-like                           |
| TCONS_00017839 | -0.627721 | -0.298673 | 0.103605   | BGIOSGA019899 | XP_015692077.1 PREDICTED: uncharacterized protein LOC102715293                            |
| TCONS_00008402 | -0.627434 | 0.160553  | -1.4148    | BGIOSGA031709 | XP_006647531.1 protein ECERIFERUM 1-like isoform X2                                       |
| TCONS_00010295 | -0.627154 | -1.04962  | -0.94156   | BGIOSGA012860 | XP_006650193.1 PREDICTED: uncharacterized protein LOC102721060                            |
| TCONS_00009006 | -0.626609 | 0.0958553 | -0.500784  | BGIOSGA014748 | NP_001168683.1 putative RING zinc finger and VWF domain family protein                    |
| TCONS_00029454 | -0.626421 | 0.669478  | -0.52421   | BGIOSGA029134 | XP_006661502.1 PREDICTED: uncharacterized protein LOC102720909                            |
| TCONS_00028314 | -0.626214 | -1.39341  | -1.23312   | BGIOSGA037060 | XP_006660289.1 probable mitochondrial adenine nucleotide transporter BTL1                 |
| TCONS_00009054 | -0.62616  | -2.01996  | -1.40883   | BGIOSGA009393 | XP_015689572.1 OTU domain-containing protein 5-A-like                                     |
| TCONS_00014472 | -0.626124 | -1.75751  | -0.980296  | BGIOSGA016631 | XP_006652432.1 glucose-6-phosphate 1-dehydrogenase, cytoplasmic isoform                   |
| TCONS_00019460 | -0.62611  | -0.660777 | -0.526849  | BGIOSGA004746 | XP_006654525.1 PREDICTED: uncharacterized protein At4g08330, chloroplast-like             |
| TCONS_00001977 | -0.625905 | -1.2083   | 0.2005     | BGIOSGA028042 | XP_015695712.1 succinate dehydrogenase subunit 6, mitochondrial                           |
| TCONS_00007274 | -0.625698 | -2.0003   | -0.684235  | BGIOSGA015687 | NP_001142221.1 uncharacterized LOC100274389                                               |
| TCONS_00015223 | -0.625696 | -0.863784 | -0.402488  | BGIOSGA010605 | XP_006653076.1 serine/threonine-protein kinase SAPK5                                      |
| TCONS_00037817 | -0.625694 | -1.03976  | -0.135586  | BGIOSGA012775 | XP_006657979.1 PREDICTED: uncharacterized protein LOC102718470                            |
| TCONS_00000597 | -0.625606 | 0.250754  | 0.00710117 | #N/A          | #N/A                                                                                      |
| TCONS_00009836 | -0.624987 | 1.82617   | 0.0857137  | BGIOSGA012388 | XP_006649905.1 protein YIPF5 homolog                                                      |
| TCONS_00012876 | -0.624795 | -1.2097   | -2.80229   | BGIOSGA011128 | XP_006650379.1 alpha-amylase/trypsin inhibitor-like                                       |
| TCONS_00016795 | -0.624754 | 0.220016  | -0.193247  | BGIOSGA014172 | XP_004960168.1 protein HEAT INTOLERANT 4                                                  |
| TCONS_00028216 | -0.624733 | -0.624815 | -1.21749   | BGIOSGA014266 | XP_015695647.1 basic leucine zipper 63                                                    |
| TCONS_00010980 | -0.624706 | -0.434796 | -0.491974  | BGIOSGA028002 | XP_003559326.1 ABC transporter B family member 25                                         |
| TCONS_00006809 | -0.624605 | -2.76501  | -0.137349  | BGIOSGA014401 | XP_006647843.1 basic blue protein-like                                                    |
| TCONS_00031540 | -0.624551 | -2.15938  | -0.99555   | BGIOSGA007056 | XP_006662002.1 MADS-box transcription factor 56                                           |
| TCONS_00017522 | -0.624491 | -1.98769  | -0.481126  | BGIOSGA028413 | XP_006659271.1 protein MEMO1 isoform X1                                                   |
| TCONS_00006269 | -0.624184 | 0.229086  | -0.333718  | BGIOSGA031015 | XP_006648743.1 auxin response factor 7                                                    |
| TCONS_00007570 | -0.624041 | -0.888725 | 0.00317214 | BGIOSGA006913 | NP_001147153.1 TPR domain containing protein                                              |
| TCONS_00011003 | -0.624041 | -0.210653 | 0.195817   | #N/A          | #N/A                                                                                      |
| TCONS_00009922 | -0.623989 | 0.5587    | 0.147722   | BGIOSGA013571 | XP_006651316.1 phytochrome B                                                              |
| TCONS_00031580 | -0.623981 | -0.423987 | -1.30684   | BGIOSGA011600 | XP_006662024.1 methylsterol monooxygenase 1-like                                          |
| TCONS_00006731 | -0.623905 | 0.367218  | -1.14432   | BGIOSGA023617 | XP_015688710.1 protein MIZU-KUSSEI 1-like                                                 |
| TCONS_00010888 | -0.623779 | -3.25281  | -1.82045   | BGIOSGA034079 | XP_015690053.1 serine carboxypeptidase-like 7                                             |
| TCONS_00018170 | -0.62365  | 0.500473  | -0.0882322 | BGIOSGA020229 | XP_004958492.1 photosystem I assembly factor PSA3, chloroplast                            |
| TCONS_00031406 | -0.623363 | -1.70279  | -0.845407  | BGIOSGA033218 | XP_003574135.1 protein NEOXANTHIN-DEFICIENT 1                                             |
| TCONS_00019886 | -0.623264 | -2.33673  | -2.31112   | BGIOSGA002089 | XP_015693309.1 peroxisomal biogenesis factor 6-like                                       |
| TCONS_00015213 | -0.623112 | 0.191019  | 0.4744     | BGIOSGA017393 | XP_015691830.1 PREDICTED: uncharacterized protein LOC102716213                            |
| TCONS_00002787 | -0.622946 | 0.902883  | 0.511538   | BGIOSGA003128 | XP_004968150.1 leucine-rich repeat extensin-like protein 2                                |
| TCONS_00018327 | -0.622886 | -0.569535 | -0.207598  | BGIOSGA022478 | XP_006654804.1 sugar transporter ERD6-like 4                                              |
| TCONS_00027940 | -0.622875 | -0.912423 | -2.01665   | #N/A          | #N/A                                                                                      |
| TCONS_00034472 | -0.622867 | 0.903338  | -0.0701526 | BGIOSGA021783 | XP_004978936.1 serine/threonine-protein kinase WNK4                                       |
| TCONS_00032826 | -0.622391 | -0.574135 | -0.308848  | BGIOSGA034658 | XP_015698190.1 F-box/LRR-repeat protein 3-like                                            |
| TCONS_00024940 | -0.622224 | -2.21295  | -0.108282  | BGIOSGA018206 | XP_006657622.1 S-adenosylmethionine carrier 1, chloroplast/mitochondrial-like isoform X2  |
| TCONS_00033623 | -0.62219  | 0.371966  | 0.693692   | BGIOSGA005045 | XP_015697685.1 RNA-binding protein MEX3D-like                                             |
| TCONS_00012589 | -0.621465 | 0.0118327 | -1.73339   | BGIOSGA016324 | XP_006650266.1 probable potassium transporter 16                                          |
| TCONS_00036433 | -0.621381 | -0.834798 | -0.416025  | BGIOSGA022276 | XP_004963204.1 pyruvate dehydrogenase E1 component subunit beta-3, chloroplast isoform X2 |
| TCONS_00021634 | -0.621361 | 0.785957  | 0.511056   | BGIOSGA004652 | XP_024312594.1 uncharacterized protein LOC100836720 isoform X3                            |
| TCONS_00015936 | -0.62128  | 1.03378   | 0.773889   | BGIOSGA015047 | XP_015691465.1 zinc finger CCH domain-containing protein 28                               |
| TCONS_00018039 | -0.621175 | -0.711776 | -0.396297  | BGIOSGA009619 | XP_006654567.1 probable prolyl 4-hydroxylase 4                                            |
| TCONS_00011542 | -0.621099 | 0.91491   | 0.0953663  | BGIOSGA016059 | XP_006649382.1 cysteine-rich repeat secretory protein 3-like                              |
| TCONS_00023377 | -0.62105  | -0.44725  | -0.506828  | BGIOSGA030496 | XP_006660481.1 cyclin-P4-1-like                                                           |
| TCONS_00036242 | -0.620912 | -0.612708 | 0.0430128  | BGIOSGA003042 | XP_006664105.1 probable Xaa-Pro aminopeptidase 3 isoform X1                               |
| TCONS_00028210 | -0.62088  | -4.21465  | -0.812068  | BGIOSGA022244 | XP_003572314.1 protein EXORDIUM-like 2                                                    |
| TCONS_00026062 | -0.620505 | -4.21512  | -1.813     | BGIOSGA020680 | XP_006659203.2 solanesyl-diphosphate synthase 1, mitochondrial-like isoform X2            |



## transcriptome

|                |           |              |            |               |                                                                                             |
|----------------|-----------|--------------|------------|---------------|---------------------------------------------------------------------------------------------|
| TCONS_00028976 | -0.620176 | 0.0827455    | -0.431222  | BGIOSGA030734 | XP_006661210.1PREDICTED: uncharacterized protein LOC102722702, partial                      |
| TCONS_00007113 | -0.619861 | -0.30105     | -0.249814  | BGIOSGA021936 | XP_006648118.1 probable voltage-gated potassium channel subunit beta                        |
| TCONS_00001611 | -0.6198   | 0.511297     | -0.22717   | BGIOSGA017621 | XP_006644547.1 protein PLASTID MOVEMENT IMPAIRED 2-like                                     |
| TCONS_00005283 | -0.619582 | -1.47932     | -1.5929    | BGIOSGA007397 | XP_006648238.1 sialyltransferase-like protein 4                                             |
| TCONS_00032452 | -0.619426 | -0.80709     | 0.488105   | BGIOSGA016006 | XP_006661874.1 probable N-succinyldiaminopimelate aminotransferase DapC isoform X1          |
| TCONS_00019748 | -0.619361 | -1.82779     | -0.767515  | BGIOSGA004232 | XP_015692776.1PREDICTED: uncharacterized protein LOC102722302                               |
| TCONS_00007828 | -0.61928  | -0.172271    | -0.0611501 | BGIOSGA024903 | XP_015688560.1PREDICTED: uncharacterized protein LOC102718991, partial                      |
| TCONS_00010713 | -0.619231 | -0.000346168 | -0.710404  | BGIOSGA012630 | XP_006651689.1 protein SABRE                                                                |
| TCONS_00013782 | -0.618891 | -0.0472288   | -0.817     | BGIOSGA030682 | XP_003581017.1UDP-glycosyltransferase 79 isoform X1                                         |
| TCONS_00026157 | -0.618628 | -3.43988     | -4.625     | BGIOSGA027415 | XP_006659227.1 uncharacterized membrane protein At1g16860-like                              |
| TCONS_00008970 | -0.618579 | -0.663811    | -0.642609  | BGIOSGA005434 | XP_006649134.1 probable serine/threonine-protein kinase vps15                               |
| TCONS_00011348 | -0.618428 | -0.171094    | 0.150743   | BGIOSGA013959 | XP_015690750.1 pantoate-beta-alanine ligase                                                 |
| TCONS_00017454 | -0.618125 | -1.21812     | 0.596144   | BGIOSGA019529 | XP_015692441.1PREDICTED: uncharacterized protein LOC102721450                               |
| TCONS_00035704 | -0.618089 | -0.487768    | -0.312628  | BGIOSGA010698 | XP_006664409.2 probable thiamine biosynthetic bifunctional enzyme, chloroplastic            |
| TCONS_00022858 | -0.617791 | 0.56211      | 0.0199797  | BGIOSGA020586 | XP_006656445.1PREDICTED: uncharacterized protein LOC102706948                               |
| TCONS_00024576 | -0.617746 | -0.472249    | -1.1243    | BGIOSGA024816 | XP_006657447.1 CSC1-like protein ERD4                                                       |
| TCONS_00016935 | -0.617373 | -0.826742    | -0.820747  | BGIOSGA008099 | XP_003576973.2protein CHROMATIN REMODELING 24 isoform X2                                    |
| TCONS_00024750 | -0.616973 | -0.307729    | -0.153292  | BGIOSGA008206 | XP_006657549.1 40S ribosomal protein S15a-1-like                                            |
| TCONS_00013815 | -0.616792 | -0.870639    | -1.85694   | BGIOSGA026351 | XP_006653215.1 G-type lectin S-receptor-like serine/threonine-protein kinase B120           |
| TCONS_00021984 | -0.616765 | 0.337127     | -0.435221  | BGIOSGA030466 | XP_006656846.2 potassium channel KOR1                                                       |
| TCONS_00006164 | -0.616744 | 0.146387     | -1.22333   | BGIOSGA021793 | XP_006647247.1 acyl-coenzyme A thioesterase 13-like                                         |
| TCONS_00029083 | -0.616703 | -0.344301    | -0.90567   | BGIOSGA033427 | XP_015696475.1 probable ethanolamine kinase                                                 |
| TCONS_00018279 | -0.616669 | -0.963245    | -0.690942  | BGIOSGA020333 | XP_006655576.2PREDICTED: uncharacterized protein LOC102702382 isoform X1                    |
| TCONS_00013872 | -0.616323 | -0.383874    | -0.249864  | BGIOSGA016052 | XP_015691390.1PREDICTED: uncharacterized protein LOC102716587, partial                      |
| TCONS_00018227 | -0.615096 | -1.29928     | -1.11535   | BGIOSGA008655 | XP_015692680.1 probable cytokinin riboside 5'-monophosphate phosphoribohydrolase LOGL7      |
| TCONS_00019454 | -0.615032 | -1.64768     | -2.16663   | #N/A          | #N/A                                                                                        |
| TCONS_00000060 | -0.614852 | -0.427418    | 0.904459   | BGIOSGA030366 | XP_006643659.2 acetyl-CoA acetyltransferase, cytosolic 1-like                               |
| TCONS_00031289 | -0.614757 | -0.116448    | 0.136769   | BGIOSGA033102 | XP_015697017.1 eukaryotic translation initiation factor isoform 4E-2                        |
| TCONS_00029292 | -0.614559 | -0.347683    | -0.0398383 | BGIOSGA029026 | XP_006660801.1 60S ribosomal protein L32-1                                                  |
| TCONS_00003282 | -0.614287 | -1.83286     | -0.221753  | BGIOSGA001930 | XP_006644032.1 uncharacterized isomerase BH0283-like                                        |
| TCONS_00004673 | -0.613904 | -0.752138    | -0.684334  | BGIOSGA005376 | XP_015699056.1 protein IQ-DOMAIN 1-like                                                     |
| TCONS_00013565 | -0.613902 | -0.741368    | -0.148679  | BGIOSGA031332 | XP_015690833.1 probable inactive poly [ADP-ribose] polymerase SRO1                          |
| TCONS_00030323 | -0.613894 | -0.248341    | -0.315855  | BGIOSGA029485 | XP_006660807.1 E3 ubiquitin-protein ligase RNF4-like                                        |
| TCONS_00011498 | -0.613603 | -1.07549     | -0.373661  | BGIOSGA030712 | XP_006649327.2PREDICTED: uncharacterized protein At4g15970-like                             |
| TCONS_00029568 | -0.613537 | -0.195823    | 0.0406503  | BGIOSGA030250 | XP_006660411.1 pre-mRNA-splicing factor 38                                                  |
| TCONS_00014150 | -0.613437 | 0.0768054    | -0.282357  | BGIOSGA031064 | XP_006652222.1PREDICTED: uncharacterized protein At2g33490-like isoform X1                  |
| TCONS_00037452 | -0.613419 | -0.363357    | -0.446727  | BGIOSGA036542 | XP_006664699.1 extra-large guanine nucleotide-binding protein 1                             |
| TCONS_00035283 | -0.613251 | -2.30031     | -0.899407  | BGIOSGA027379 | XP_015698144.1 kinesin-like protein KIFC3 isoform X2                                        |
| TCONS_00016555 | -0.612813 | -1.04962     | -1.20005   | BGIOSGA005783 | XP_004976700.1trihelix transcription factor GT-3b                                           |
| TCONS_00011366 | -0.61281  | -0.640224    | -0.112341  | BGIOSGA013980 | XP_006650927.1 ATP-dependent DNA helicase 2 subunit KU80                                    |
| TCONS_00004787 | -0.612691 | -0.975307    | -0.644966  | BGIOSGA006726 | XP_006665041.1 protein LIKE COV 2-like                                                      |
| TCONS_00027973 | -0.61255  | -0.448456    | -0.794803  | BGIOSGA027022 | XP_022683438.1uncharacterized protein LOC101777506                                          |
| TCONS_00016642 | -0.612128 | -0.520461    | -0.759029  | BGIOSGA014319 | XP_006652847.1 probable polyamine oxidase 2                                                 |
| TCONS_00023367 | -0.612042 | 0.911896     | 0.424833   | BGIOSGA037532 | XP_024313333.1uncharacterized protein LOC100833961                                          |
| TCONS_00017029 | -0.611961 | 0.216729     | -0.0719591 | BGIOSGA011648 | XP_003566634.1calcium-transporting ATPase 4, endoplasmic reticulum-type                     |
| TCONS_00008585 | -0.611779 | -0.730253    | -1.39264   | BGIOSGA014398 | XP_006647688.2 protein REVEILLE 6 isoform X1                                                |
| TCONS_00011753 | -0.611346 | -0.0488746   | 0.18736    | BGIOSGA011252 | XP_006649591.1 activating signal cointegrator 1 complex subunit 2                           |
| TCONS_00008406 | -0.61094  | -2.03545     | -0.72482   | BGIOSGA006016 | XP_006647535.1 putative phosphatidylinositol N-acetylglucosaminyltransferase subunit C      |
| TCONS_00019706 | -0.610492 | -1.54064     | -0.464912  | BGIOSGA017654 | XP_015693273.1 beta-galactosidase 8 isoform X1                                              |
| TCONS_00021451 | -0.610303 | -0.366669    | -1.19389   | BGIOSGA020708 | XP_006655684.1 protein REVEILLE 6-like                                                      |
| TCONS_00023170 | -0.610271 | -2.70771     | -1.2458    | BGIOSGA019255 | XP_015695093.1 probable inactive leucine-rich repeat receptor-like protein kinase At3g03770 |
| TCONS_00006051 | -0.610249 | 0.382842     | -0.183648  | BGIOSGA016317 | XP_003574974.140S ribosomal protein S27                                                     |
| TCONS_00016301 | -0.609917 | -0.748284    | 0.705812   | BGIOSGA014668 | XP_006652553.1 vicilin-like seed storage protein At2g18540                                  |
| TCONS_00029545 | -0.609506 | -0.083918    | -0.813619  | BGIOSGA013642 | XP_006661002.2 U-box domain-containing protein 33-like isoform X1                           |

transcriptome

|                |           |            |            |               |                                                                                          |
|----------------|-----------|------------|------------|---------------|------------------------------------------------------------------------------------------|
| TCONS_00022698 | -0.609495 | -0.928753  | 0.0371217  | BGIOSGA014389 | XP_006656330.1PREDICTED: uncharacterized protein LOC102722867                            |
| TCONS_00004576 | -0.609359 | -0.53124   | -0.453743  | BGIOSGA025216 | XP_006644858.1 probable sugar phosphate/phosphate translocator At2g25520                 |
| TCONS_00002553 | -0.609224 | -0.959989  | -0.363621  | BGIOSGA037096 | XP_006646693.1 protein CLT1, chloroplastic                                               |
| TCONS_00009296 | -0.608739 | -0.795683  | -0.947397  | BGIOSGA015572 | XP_006651027.2 ABC transporter C family member 13 isoform X1                             |
| TCONS_00023867 | -0.608356 | 0.775439   | 1.14627    | BGIOSGA027683 | XP_004957941.1 probable histone H2A.1                                                    |
| TCONS_00030549 | -0.608244 | -0.203458  | -0.301168  | BGIOSGA029254 | XP_003578662.1 myosin heavy chain, embryonic smooth muscle isoform                       |
| TCONS_00018610 | -0.60823  | -0.547016  | -0.0992803 | BGIOSGA018824 | XP_006654985.1 putative membrane-bound O-acyltransferase C24H6.01c isoform X1            |
| TCONS_00012380 | -0.608069 | 0.241354   | -0.432793  | BGIOSGA026165 | XP_006650153.1 40S ribosomal protein S6                                                  |
| TCONS_00006066 | -0.607918 | -1.86934   | -0.661931  | BGIOSGA026802 | XP_015688595.1 phenolic glucoside malonyltransferase 1-like                              |
| TCONS_00026857 | -0.607697 | 1.02436    | 0.715764   | BGIOSGA022245 | XP_010235410.1 uncharacterized protein LOC100835952 isoform X2                           |
| TCONS_00011341 | -0.607404 | -1.50372   | -0.320497  | BGIOSGA000207 | XP_015690804.1 aspartokinase 1, chloroplastic isoform X1                                 |
| TCONS_00013582 | -0.606856 | -0.873364  | 0.0875974  | BGIOSGA005350 | NP_001148776.1 cysteine-type peptidase                                                   |
| TCONS_00006989 | -0.60684  | -0.265387  | 0.146728   | BGIOSGA005913 | XP_004954166.1 putative lipase C4A8.10 isoform X1                                        |
| TCONS_00014767 | -0.606826 | 0.798844   | -1.24634   | BGIOSGA023035 | XP_015692284.1 RHOMBOID-like protein 2 isoform X2                                        |
| TCONS_00020424 | -0.606702 | -0.755386  | -1.15036   | BGIOSGA025349 | XP_008659068.1O-fucosyltransferase 15                                                    |
| TCONS_00009518 | -0.606674 | 0.630548   | 0.0867393  | BGIOSGA012066 | XP_015689807.1PREDICTED: uncharacterized protein LOC102709629                            |
| TCONS_00008555 | -0.606423 | -1.40812   | -0.899415  | BGIOSGA020820 | XP_006647662.1 GDSL esterase/lipase At5g55050-like                                       |
| TCONS_00001736 | -0.606142 | -0.245962  | 0.34424    | BGIOSGA004441 | XP_006644644.1 NADP-dependent malic enzyme isoform X2                                    |
| TCONS_00018055 | -0.606018 | 0.137471   | -0.439764  | BGIOSGA012874 | XP_015693065.1 transcription elongation factor SPT6 isoform X1                           |
| TCONS_00037885 | -0.605819 | -2.66195   | #N/A       | #N/A          | #N/A                                                                                     |
| TCONS_00023036 | -0.605625 | 0.864752   | -0.972439  | BGIOSGA015758 | XP_006657411.1PREDICTED: uncharacterized protein LOC102721288 isoform X1                 |
| TCONS_00011250 | -0.604909 | -1.3031    | -0.251087  | BGIOSGA032613 | XP_015690130.1 DIMBOA UDP-glucosyltransferase BX8-like                                   |
| TCONS_00022856 | -0.60488  | 0.418283   | -0.364817  | BGIOSGA004077 | XP_008228256.1 eukaryotic initiation factor 4A-11                                        |
| TCONS_00015799 | -0.604744 | -0.096819  | -0.0265702 | BGIOSGA018793 | XP_006652225.1 transport inhibitor response 1-like protein Os04g0395600                  |
| TCONS_00014145 | -0.604582 | -1.65144   | -1.71133   | BGIOSGA022703 | XP_015692379.1 serine/threonine-protein kinase CDL1-like                                 |
| TCONS_00031226 | -0.604016 | -0.654625  | -0.46976   | BGIOSGA011444 | XP_003573986.1 uncharacterized protein LOC100844091 isoform X1                           |
| TCONS_00000252 | -0.603755 | -1.63242   | -1.11702   | BGIOSGA003419 | XP_003568700.3serine carboxypeptidase II-1                                               |
| TCONS_00006785 | -0.603537 | -0.0898146 | -0.584624  | BGIOSGA031224 | XP_015696862.1 25S rRNA (cytosine-C(5))-methyltransferase nop2 isoform X2                |
| TCONS_00024378 | -0.603503 | -1.11222   | -0.71399   | BGIOSGA010840 | XP_004958758.1 nitrate regulatory gene2 protein isoform X1                               |
| TCONS_00003489 | -0.603452 | -2.24212   | -0.669196  | BGIOSGA008185 | XP_015697242.1 cleavage and polyadenylation specificity factor subunit 6-like isoform X3 |
| TCONS_00019544 | -0.603399 | -3.97725   | 0.0261742  | BGIOSGA017814 | XP_006655436.2 probable calcium-binding protein CML9                                     |
| TCONS_00027327 | -0.603397 | -0.246557  | -0.342255  | #N/A          | #N/A                                                                                     |
| TCONS_00013527 | -0.603305 | -0.0286217 | -0.405847  | BGIOSGA036472 | XP_012704142.1 pirin-like protein isoform X4                                             |
| TCONS_00018315 | -0.602952 | 0.433449   | 0.0692018  | BGIOSGA000819 | XP_006654794.1 60S ribosomal protein L18a-like                                           |
| TCONS_00003130 | -0.602841 | -0.429842  | -0.396437  | BGIOSGA002094 | XP_015699137.1PREDICTED: uncharacterized protein LOC102718414, partial                   |
| TCONS_00020129 | -0.602764 | -0.258029  | -0.372674  | BGIOSGA027765 | XP_00665791.1 shikimate O-hydroxycinnamoyltransferase-like                               |
| TCONS_00024072 | -0.602588 | -1.13957   | -0.913869  | BGIOSGA016408 | XP_006658796.1PREDICTED: uncharacterized protein LOC102703598                            |
| TCONS_00016704 | -0.602107 | -0.951327  | -1.296     | BGIOSGA022286 | XP_006653807.2 agmatine coumaroyltransferase-like                                        |
| TCONS_00009793 | -0.602081 | -0.690276  | -1.61372   | BGIOSGA012350 | XP_006649867.1 nitric oxide synthase-interacting protein                                 |
| TCONS_00006621 | -0.602053 | -1.14054   | -1.0886    | BGIOSGA022749 | XP_022678981.1 uncharacterized protein LOC101778835                                      |
| TCONS_00035542 | -0.602012 | 0.710901   | 1.40413    | BGIOSGA005135 | XP_002442692.1 probable calcium-transporting ATPase 9, plasma membrane-type              |
| TCONS_00025523 | -0.601877 | 0.38549    | 0.225354   | BGIOSGA007652 | XP_002453367.160S ribosomal protein L27a-2                                               |
| TCONS_00030190 | -0.601869 | -1.23406   | -1.11036   | BGIOSGA029612 | NP_001131978.1Purine permease 3                                                          |
| TCONS_00016740 | -0.601527 | -1.41817   | -0.159519  | BGIOSGA034432 | XP_003580694.1ethylene-responsive transcription factor RAP2-1                            |
| TCONS_00024791 | -0.601171 | -2.65629   | -0.254752  | BGIOSGA009570 | XP_006657572.1 transcription elongation factor TFIIIS-like                               |
| TCONS_00014205 | -0.600997 | -1.19115   | -1.05963   | BGIOSGA029643 | XP_015691820.1 alpha carbonic anhydrase 1, chloroplastic-like                            |
| TCONS_00010135 | -0.600942 | -0.145363  | -0.236276  | BGIOSGA009416 | XP_006650115.1 peptidyl-prolyl cis-trans isomerase PASTICCINO1                           |
| TCONS_00035168 | -0.600708 | -0.130016  | -0.735641  | BGIOSGA007976 | XP_006663042.1 probable LRR receptor-like serine/threonine-protein kinase At5g10290      |
| TCONS_00022470 | -0.60067  | -0.174489  | -0.192452  | BGIOSGA032430 | XP_015694334.1 protein NRT1/ PTR FAMILY 4.6-like isoform X3                              |
| TCONS_00028489 | -0.600642 | 0.560898   | 0.204535   | BGIOSGA026468 | XP_006660397.2 mediator of RNA polymerase II transcription subunit 15a                   |
| TCONS_00011735 | -0.600397 | -0.797206  | -0.521953  | BGIOSGA020777 | XP_021309013.1methyltransferase-like protein 2                                           |
| TCONS_00014887 | -0.600259 | -0.698938  | -0.274908  | BGIOSGA013733 | XP_015691793.1 probable WRKY transcription factor 17                                     |
| TCONS_00019941 | -0.60018  | -0.10066   | -0.399479  | BGIOSGA022125 | XP_015694285.1 U-box domain-containing protein 12 isoform X1                             |

## transcriptome

|                |           |            |             |               |                                                                                        |
|----------------|-----------|------------|-------------|---------------|----------------------------------------------------------------------------------------|
| TCONS_00027764 | -0.600149 | -1.20358   | -0.654197   | BGIOSGA017150 | XP_014756325.2putative disease resistance protein RGA3                                 |
| TCONS_00001038 | -0.600002 | -0.775095  | -0.887718   | BGIOSGA003638 | XP_006644230.1 probable protein Pop3                                                   |
| TCONS_00010404 | -0.599632 | -0.336301  | 0.385295    | BGIOSGA012993 | NP_001151230.2DTW domain containing protein                                            |
| TCONS_00012827 | -0.599585 | 0.832234   | -0.386649   | BGIOSGA026297 | XP_015690423.1 nuclear transcription factor Y subunit A-10-like                        |
| TCONS_00005424 | -0.599386 | 0.745697   | 0.0402743   | BGIOSGA000187 | XP_015689456.1 26S proteasome non-ATPase regulatory subunit 2 homolog A-like           |
| TCONS_00012961 | -0.599321 | 1.13604    | -0.620155   | #N/A          | #N/A                                                                                   |
| TCONS_00003970 | -0.599211 | -1.03778   | -1.63346    | BGIOSGA001220 | XP_015688304.1 DNA (cytosine-5)-methyltransferase isoform X2                           |
| TCONS_00031079 | -0.599163 | 0.67544    | -0.239171   | BGIOSGA034501 | XP_002436652.140S ribosomal protein S17-3                                              |
| TCONS_00016341 | -0.599109 | -1.20211   | 0.0234799   | BGIOSGA007430 | XP_006653632.1 histone-lysine N-methyltransferase, H3 lysine-9 specific SUVH5-like     |
| TCONS_00005706 | -0.59891  | -0.334956  | -0.206764   | BGIOSGA021041 | XP_015689421.1 nuclear poly(A) polymerase 4-like isoform X1                            |
| TCONS_00002324 | -0.598813 | -1.39767   | -0.482952   | BGIOSGA005848 | XP_015688924.1PREDICTED: LOW QUALITY PROTEIN: uncharacterized protein                  |
| TCONS_00028574 | -0.597659 | -0.606777  | -0.204365   | BGIOSGA005936 | LOC102711226                                                                           |
| TCONS_00036506 | -0.597405 | -0.929639  | -0.108197   | BGIOSGA013365 | XP_004966549.1leucine-rich repeat protein 1                                            |
| TCONS_00029989 | -0.597299 | -0.762267  | -0.177525   | BGIOSGA029833 | XP_006664791.2 HIPL1 protein                                                           |
| TCONS_00031664 | -0.597296 | -0.893666  | -0.0117123  | BGIOSGA000482 | XP_006648810.1PREDICTED: uncharacterized protein LOC102722839                          |
| TCONS_00030254 | -0.596639 | 0.138354   | -0.403378   | BGIOSGA030621 | XP_006662620.1 pyruvate kinase isozyme G, chloroplastic-like                           |
| TCONS_00000562 | -0.596235 | -2.98581   | -2.57691    | BGIOSGA030479 | XP_002462562.1uncharacterized protein LOC8064843                                       |
| TCONS_00030578 | -0.596113 | 1.45642    | 0.0666743   | BGIOSGA020093 | XP_010230692.1uncharacterized protein LOC104582533                                     |
| TCONS_00027655 | -0.596006 | 0.598863   | -0.577489   | BGIOSGA009769 | XP_006661587.1 G-type lectin S-receptor-like serine/threonine-protein kinase At5g24080 |
| TCONS_00031698 | -0.595833 | 0.230636   | -0.00346171 | BGIOSGA040471 | XP_002455932.1ATP synthase subunit epsilon, mitochondrial                              |
| TCONS_00008134 | -0.595602 | 0.744272   | 0.461916    | BGIOSGA036595 | XP_006662126.1 serine carboxypeptidase-like 6                                          |
| TCONS_00016311 | -0.595552 | -0.12696   | -1.01553    | BGIOSGA028590 | XP_015688813.1 transcription factor E2FA-like                                          |
| TCONS_00028137 | -0.595477 | -1.3747    | -0.84715    | BGIOSGA032818 | XP_014751505.1probable ascorbate-specific transmembrane electron transporter 2         |
| TCONS_00004758 | -0.595475 | -0.169981  | -0.941498   | BGIOSGA017011 | XP_003574599.1homeobox-leucine zipper protein HOX27                                    |
| TCONS_00014121 | -0.595387 | 0.350254   | -0.0139631  | BGIOSGA012970 | XP_006646494.1PREDICTED: uncharacterized protein LOC102720109, partial                 |
| TCONS_00006305 | -0.595207 | 0.158813   | -2.15797    | BGIOSGA030097 | XP_006652213.1PREDICTED: uncharacterized protein LOC102711249                          |
| TCONS_00032113 | -0.595113 | -0.40931   | 0.0486505   | BGIOSGA036736 | XP_006647334.1 ent-cassadiene C2-hydroxylase-like                                      |
| TCONS_00007561 | -0.595039 | -0.382307  | -0.428446   | BGIOSGA016487 | XP_006659222.1 ethanolamine-phosphate cytidylyltransferase-like                        |
| TCONS_00020144 | -0.595002 | -0.443304  | 0.395335    | BGIOSGA022342 | XP_015688500.1 nuclear pore complex protein NUP205                                     |
| TCONS_00015247 | -0.594929 | 0.147274   | -1.59489    | BGIOSGA015734 | XP_015694352.1 protein IQ-DOMAIN 1                                                     |
| TCONS_00000038 | -0.594665 | -3.68389   | -4.97231    | BGIOSGA009581 | XP_015691322.1 UNC93-like protein 1 isoform X1                                         |
| TCONS_00019026 | -0.59433  | -1.25679   | -1.08394    | BGIOSGA026572 | XP_006648169.2PREDICTED: uncharacterized protein LOC102710760                          |
| TCONS_00008375 | -0.59424  | -0.147026  | 0.022938    | BGIOSGA036622 | XP_006654247.1 pentatricopeptide repeat-containing protein At5g16860                   |
| TCONS_00021401 | -0.594135 | -1.66653   | -1.99722    | BGIOSGA024325 | XP_006647513.1 UDP-galactose transporter 2-like                                        |
| TCONS_00014548 | -0.593891 | -1.06964   | -0.979174   | BGIOSGA009838 | XP_006657358.1 expansin-like A4                                                        |
| TCONS_00014651 | -0.593785 | 0.751817   | -0.66272    | BGIOSGA017371 | XP_003580080.1magnesium transporter MRS2-C                                             |
| TCONS_00019306 | -0.593691 | 0.368527   | 0.0605571   | BGIOSGA018039 | XP_006652558.1 elicitor-responsive protein 3                                           |
| TCONS_00016697 | -0.593596 | -0.15004   | -0.171276   | #N/A          | XP_006654413.2 uncharacterized hydrolase YugF                                          |
| TCONS_00014638 | -0.593435 | -0.375492  | -0.958376   | BGIOSGA016795 | #N/A                                                                                   |
| TCONS_00008994 | -0.592792 | 0.213646   | -0.515143   | BGIOSGA005413 | XP_006652541.1PREDICTED: uncharacterized protein LOC102715104                          |
| TCONS_00006630 | -0.592738 | -0.0422335 | -0.167463   | BGIOSGA024373 | XP_010673301.1 40S ribosomal protein S30                                               |
| TCONS_00029017 | -0.592729 | 0.46919    | 0.87373     | BGIOSGA002553 | XP_008790519.1 ORM1-like protein 3                                                     |
| TCONS_00019912 | -0.592598 | -0.571426  | -1.2507     | BGIOSGA013688 | XP_006660631.2 probable E3 ubiquitin-protein ligase RNF144A-B                          |
| TCONS_00001721 | -0.592559 | -1.49114   | -0.837642   | BGIOSGA034856 | XP_006654874.1 translation initiation factor IF-2-like                                 |
| TCONS_00005614 | -0.592403 | -1.38419   | -0.722121   | BGIOSGA007727 | XP_022682212.1putative disease resistance protein RGA3 isoform X2                      |
| TCONS_00016540 | -0.592301 | -0.88393   | -4.43997    | BGIOSGA021829 | XP_006648418.1PREDICTED: uncharacterized protein LOC102717774                          |
| TCONS_00024746 | -0.592256 | 0.750675   | -0.0289251  | BGIOSGA022708 | XP_024312090.1wall-associated receptor kinase 2                                        |
| TCONS_00028242 | -0.592064 | -1.00101   | -1.83728    | BGIOSGA037477 | XP_010228237.1uncharacterized protein LOC100842709                                     |
| TCONS_00006531 | -0.591428 | -2.40692   | -0.341014   | BGIOSGA035676 | XP_006659540.1 tricin synthase 1                                                       |
| TCONS_00021421 | -0.591326 | -0.117543  | -0.446236   | BGIOSGA023647 | XP_015689021.1 myb-related protein 308                                                 |
| TCONS_00017585 | -0.591178 | 1.15967    | 0.81556     | BGIOSGA029757 | XP_003563221.1lysM and putative peptidoglycan-binding domain-containing protein 1      |
| TCONS_00014344 | -0.591118 | -0.501022  | 0.511053    | BGIOSGA010409 | XP_006655211.1 probable WRKY transcription factor 26                                   |
| TCONS_00023971 | -0.590656 | -2.62362   | -1.81827    | BGIOSGA025235 | XP_003579863.1polyadenylate-binding protein RBP47                                      |
| TCONS_00005650 | -0.590483 | -0.260572  | -0.544896   | BGIOSGA020942 | XP_006657880.1 glutamic acid-rich protein-like                                         |
|                |           |            |             |               | XP_006648446.1 death-inducer obliterator 1-like                                        |

transcriptome

|                |           |            |             |               |                                                                                                                                       |
|----------------|-----------|------------|-------------|---------------|---------------------------------------------------------------------------------------------------------------------------------------|
| TCONS_00030344 | -0.590481 | 0.136635   | -0.247144   | BGIOSGA026575 | XP_006660829.1 ADP-ribosylation factor<br>GTPase-activating protein AGD3-like                                                         |
| TCONS_00018323 | -0.590374 | -0.557056  | -0.11129    | BGIOSGA019151 | XP_006654801.2 aspartic proteinase oryzasin-1<br>isoform X1                                                                           |
| TCONS_00000311 | -0.589777 | -0.135984  | -0.133609   | BGIOSGA029989 | XP_006643827.1 E3 ubiquitin-protein ligase<br>At1g12760-like                                                                          |
| TCONS_00011335 | -0.589734 | -2.99402   | -1.59315    | BGIOSGA028365 | XP_015690473.1 PREDICTED: uncharacterized<br>protein At4g15970-like                                                                   |
| TCONS_00019891 | -0.589558 | 0.00576033 | -1.78623    | BGIOSGA021766 | XP_006655641.2 transcription factor FAMA<br>XP_006649651.1 G-type lectin S-receptor-like<br>serine/threonine-protein kinase At2g19130 |
| TCONS_00009588 | -0.589322 | -0.527897  | -0.952737   | BGIOSGA012967 | NP_001151680.1 protein transport protein Sec61<br>beta subunit                                                                        |
| TCONS_00035654 | -0.589204 | -0.101968  | 0.084385    | BGIOSGA003782 | XP_006659065.1 60S acidic ribosomal protein<br>P1-like                                                                                |
| TCONS_00025819 | -0.589202 | 0.441529   | -0.448985   | BGIOSGA019946 | XP_006657767.1 cytochrome P450 716B1-like                                                                                             |
| TCONS_00023781 | -0.589018 | -1.99492   | -1.13549    | BGIOSGA025820 | XP_002443718.2 probable polygalacturonase                                                                                             |
| TCONS_00025784 | -0.588881 | -0.747164  | -0.385804   | BGIOSGA004006 | XP_006644477.1 probable receptor-like protein<br>kinase At2g42960                                                                     |
| TCONS_00004123 | -0.588788 | -2.18785   | -4.59549    | BGIOSGA003388 | XP_006659329.1 PREDICTED: uncharacterized<br>protein LOC102706867 isoform X2                                                          |
| TCONS_00027884 | -0.5887   | 1.98196    | -2.27378    | BGIOSGA033064 | XP_006649568.1 deSI-like protein At4g17486                                                                                            |
| TCONS_00009502 | -0.588281 | -0.452563  | -0.360254   | BGIOSGA021038 | XP_015698672.1 plastidial lipoyltransferase 2-<br>like                                                                                |
| TCONS_00037460 | -0.587927 | -0.848958  | -0.730948   | BGIOSGA035899 | XP_004962146.1 uncharacterized protein<br>LOC101767296                                                                                |
| TCONS_00017776 | -0.587601 | -1.23941   | 0.226397    | BGIOSGA019841 | XP_015689587.1 PREDICTED: uncharacterized<br>protein LOC102721239                                                                     |
| TCONS_00008432 | -0.587554 | -1.27017   | -0.716074   | BGIOSGA014691 | XP_015690251.1 putative F-box protein<br>At1g23770                                                                                    |
| TCONS_00011840 | -0.587489 | 0.367734   | -0.0379774  | BGIOSGA000262 | XP_006655711.1 6-phosphogluconate<br>dehydrogenase, decarboxylating 1                                                                 |
| TCONS_00019980 | -0.587275 | 2.06785    | 0.465862    | BGIOSGA022167 | XP_006643776.1 NF-X1-type zinc finger protein<br>NFLX2                                                                                |
| TCONS_00002868 | -0.587108 | -0.242429  | 0.487832    | BGIOSGA002351 | XP_015690779.1 rab9 effector protein with kelch<br>motifs                                                                             |
| TCONS_00011286 | -0.586818 | -0.056068  | -0.506366   | BGIOSGA022466 | XP_015692090.1 protein RCC2 homolog                                                                                                   |
| TCONS_00015122 | -0.586687 | -0.900866  | -0.0349134  | BGIOSGA017301 | XP_006644863.2 cytochrome P450 94B3-like                                                                                              |
| TCONS_00002006 | -0.586631 | -1.74323   | -3.48666    | BGIOSGA011824 | XP_003577782.1 protein TPLATE                                                                                                         |
| TCONS_00034402 | -0.586194 | -0.158683  | -0.0556814  | BGIOSGA009191 | XP_004958113.1 beta-hexosaminidase 2                                                                                                  |
| TCONS_00025394 | -0.584885 | -4.11161   | -2.03471    | BGIOSGA025397 | XP_006654929.1 PREDICTED: uncharacterized<br>protein LOC102716972                                                                     |
| TCONS_00022057 | -0.584702 | -4.76663   | -1.66533    | BGIOSGA025988 | XP_006645129.1 probable magnesium<br>transporter NIPA4                                                                                |
| TCONS_00002290 | -0.584153 | 0.972784   | -0.186049   | BGIOSGA020176 | XP_024318541.1 uncharacterized protein<br>LOC100837437                                                                                |
| TCONS_00039483 | -0.584115 | -1.35829   | 0.346936    | BGIOSGA012955 | XP_015690025.1 1,4-dihydroxy-2-naphthoyl-CoA<br>thioesterase 1                                                                        |
| TCONS_00012975 | -0.58406  | -1.47263   | -0.982028   | BGIOSGA014167 | XP_009400717.1 probable methyltransferase<br>PMT15                                                                                    |
| TCONS_00032583 | -0.583807 | -1.7265    | -0.603006   | BGIOSGA015928 | XP_004973867.1 transcription factor bHLH130<br>isoform X1                                                                             |
| TCONS_00026908 | -0.58375  | 0.15088    | -0.412828   | BGIOSGA019606 | XP_006652689.1 E3 ubiquitin-protein ligase EL5-<br>like                                                                               |
| TCONS_00016469 | -0.583474 | -1.68329   | -0.349105   | BGIOSGA011442 | XP_010233742.1 putative F-box protein<br>At3g16210                                                                                    |
| TCONS_00030740 | -0.58309  | -0.742914  | -0.00707942 | BGIOSGA003756 | XP_006663493.1 retinoblastoma-related protein<br>2 isoform X1                                                                         |
| TCONS_00033591 | -0.583057 | -0.248635  | -0.291564   | BGIOSGA026573 | XP_003575013.1 uncharacterized protein<br>LOC100827089                                                                                |
| TCONS_00006128 | -0.582934 | -1.15885   | -1.11785    | BGIOSGA005079 | XP_015690356.1 geraniol 8-hydroxylase-like                                                                                            |
| TCONS_00011902 | -0.582841 | -2.63273   | -0.185785   | BGIOSGA007687 | XP_015695699.1 60S ribosomal protein L32-1-<br>like                                                                                   |
| TCONS_00026973 | -0.582763 | 0.0331809  | -0.514795   | BGIOSGA029496 | XP_010504143.1 histone H4                                                                                                             |
| TCONS_00002126 | -0.582725 | 1.51699    | 0.339164    | BGIOSGA030813 | XP_021309842.1 probable anion transporter 5,<br>chloroplastic                                                                         |
| TCONS_00030519 | -0.582318 | 0.432991   | -0.960083   | BGIOSGA029273 | XP_021307322.1 probable F-box protein<br>At4g22165 isoform X3                                                                         |
| TCONS_00014747 | -0.582281 | -0.712905  | 0.26222     | BGIOSGA016923 | XP_006657081.2 probable LRR receptor-like<br>serine/threonine-protein kinase At3g47570                                                |
| TCONS_00039100 | -0.582179 | -1.4557    | -0.554138   | BGIOSGA032669 | XP_015691075.1 short-chain dehydrogenase TIC<br>32, chloroplastic                                                                     |
| TCONS_00011448 | -0.582176 | -4.34592   | -1.62144    | BGIOSGA022177 | XP_015696148.1 DNA polymerase I A,<br>chloroplastic-like                                                                              |
| TCONS_00027452 | -0.582159 | -0.921212  | -0.685068   | BGIOSGA017210 | XP_006654873.1 probable protein phosphatase<br>2C 53                                                                                  |
| TCONS_00019910 | -0.581618 | -0.482752  | -0.662777   | BGIOSGA017659 |                                                                                                                                       |
| TCONS_00037579 | -0.58137  | -0.372088  | #NA         | #NA           | #NA                                                                                                                                   |
| TCONS_00000371 | -0.580927 | -1.26205   | -0.831269   | BGIOSGA002947 | XP_006643874.1 PREDICTED: uncharacterized<br>protein LOC102703429                                                                     |
| TCONS_00031695 | -0.580614 | -0.556319  | -0.238173   | BGIOSGA036001 | XP_015697148.1 protein TIC 62, chloroplastic                                                                                          |
| TCONS_00017521 | -0.580542 | -0.728959  | -0.519022   | BGIOSGA019592 | XP_015698993.1 cathepsin B-like                                                                                                       |
| TCONS_00037580 | -0.580532 | 0.0336538  | 1.21829     | BGIOSGA035780 | XP_015698375.1 pyridine nucleotide-disulfide<br>oxidoreductase domain-containing protein 2                                            |
| TCONS_00019298 | -0.580478 | 1.29407    | -0.148437   | BGIOSGA028172 | XP_015693342.1 probably inactive leucine-rich<br>repeat receptor-like protein kinase At5g48380                                        |
| TCONS_00023472 | -0.580353 | 0.859367   | 0.520492    | BGIOSGA025621 | XP_021308380.1 putative disease resistance<br>RPP13-like protein 1                                                                    |
| TCONS_00000046 | -0.579699 | -1.61207   | -0.405187   | BGIOSGA002613 | XP_015692925.1 probable glycosyltransferase<br>At3g07620 isoform X3                                                                   |
| TCONS_00016727 | -0.579537 | -0.652943  | -0.410503   | BGIOSGA014234 | XP_015691332.1 PREDICTED: uncharacterized<br>protein LOC102708241 isoform X1                                                          |
| TCONS_00002432 | -0.579339 | -1.11214   | -0.630599   | BGIOSGA005074 | XP_010234976.1 exocyst complex component<br>EXO70E2                                                                                   |
| TCONS_00002678 | -0.578829 | -0.273065  | -0.122722   | BGIOSGA002543 | XP_015688096.1 protein EXECUTER 2,<br>chloroplastic                                                                                   |

transcriptome

|                |           |           |            |               |                                                                                          |
|----------------|-----------|-----------|------------|---------------|------------------------------------------------------------------------------------------|
| TCONS_00007618 | -0.578706 | -0.217219 | -0.30646   | BGIOSGA023119 | XP_006648462.1 putative GATA transcription factor 22                                     |
| TCONS_00006357 | -0.578559 | -0.180546 | 0.270073   | BGIOSGA036238 | XP_002452366.1glycerophosphodiester phosphodiesterase GDPDL3                             |
| TCONS_00027024 | -0.578482 | -0.613495 | -0.363465  | BGIOSGA029313 | XP_015695685.1 chitin elicitor receptor kinase 1-like                                    |
| TCONS_00003781 | -0.578428 | -0.410211 | -0.730678  | BGIOSGA031397 | XP_006663383.1 F-box/LRR-repeat protein 4                                                |
| TCONS_00022559 | -0.578228 | -1.44956  | -1.92757   | BGIOSGA027024 | XP_015693849.1 transcription factor TGA2-like isoform X2                                 |
| TCONS_00025661 | -0.578175 | 0.0689121 | -0.591873  | BGIOSGA033777 | XP_006658929.2 tyrosine-specific transport protein-like                                  |
| TCONS_00014484 | -0.578139 | -0.309105 | 0.430873   | BGIOSGA008570 | XP_006652438.1 cyclin-dependent kinase G-2 isoform X1                                    |
| TCONS_00004644 | -0.578107 | -3.49596  | -0.772614  | BGIOSGA017723 | XP_006644925.1 transcription repressor OFP1-like                                         |
| TCONS_00016944 | -0.577856 | -0.987703 | -0.667598  | BGIOSGA002547 | XP_006654891.1 peroxisomal membrane protein PEX14-like isoform X2                        |
| TCONS_00027013 | -0.577414 | -0.260032 | -0.749867  | BGIOSGA033343 | XP_006659635.1 NAC domain-containing protein 83-like                                     |
| TCONS_00004679 | -0.577405 | -1.45633  | 0.193262   | BGIOSGA000536 | XP_003564555.1dirigent protein 17                                                        |
| TCONS_00017822 | -0.577177 | 1.54925   | 1.06239    | BGIOSGA012061 | XP_003568440.1uncharacterized protein LOC100831239                                       |
| TCONS_00021943 | -0.577102 | -0.50671  | -0.0904909 | BGIOSGA035284 | XP_006656826.1 mucin-5AC-like                                                            |
| TCONS_00001247 | -0.576937 | -1.31941  | -0.378811  | BGIOSGA000526 | XP_006646056.1 serine/threonine-protein kinase AFC3                                      |
| TCONS_00036502 | -0.576885 | -0.797055 | -0.290212  | BGIOSGA037871 | XP_015698383.1PREDICTED: uncharacterized protein Ytfp, partial                           |
| TCONS_00018740 | -0.576752 | -1.07398  | 0.735371   | BGIOSGA018677 | XP_015692751.1PREDICTED: uncharacterized protein LOC102713629 isoform X2                 |
| TCONS_00023467 | -0.576734 | -3.17576  | -1.77601   | BGIOSGA025501 | XP_015694596.1 LRR receptor-like serine/threonine-protein kinase ERECTA                  |
| TCONS_00015474 | -0.576638 | -0.451336 | -1.45352   | BGIOSGA012604 | XP_006665010.1PREDICTED: uncharacterized protein LOC102710368                            |
| TCONS_00000332 | -0.576131 | -0.203347 | 0.0542817  | BGIOSGA019295 | XP_006643849.1 FACT complex subunit SSRP1-A                                              |
| TCONS_00036775 | -0.576113 | -1.69983  | 1.43827    | BGIOSGA036542 | XP_006664386.2 protein-tyrosine-phosphatase PTP1-like isoform X1                         |
| TCONS_00018803 | -0.57607  | -0.955343 | -1.28535   | BGIOSGA012310 | XP_004960601.1aquaporin NIP1-3                                                           |
| TCONS_00037518 | -0.575613 | -0.379972 | -1.24338   | BGIOSGA035847 | XP_006664189.1PREDICTED: uncharacterized protein LOC102721410                            |
| TCONS_00036542 | -0.57525  | 0.281813  | -0.578038  | BGIOSGA034637 | XP_006664872.1 pentatricopeptide repeat-containing protein At2g38420, mitochondrial-like |
| TCONS_00012980 | -0.575113 | 1.28401   | -0.0266033 | BGIOSGA010010 | XP_006651712.1PREDICTED: uncharacterized protein LOC102702550, partial                   |
| TCONS_00014754 | -0.575099 | 1.39508   | 0.421589   | BGIOSGA007259 | XP_015692381.1 protein CHROMATIN REMODELING 19                                           |
| TCONS_00010979 | -0.574985 | -0.251952 | -0.176254  | BGIOSGA009943 | XP_010229723.1serine/threonine-protein kinase ds1                                        |
| TCONS_00032624 | -0.574929 | 0.394216  | 0.0663522  | BGIOSGA026547 | XP_003574263.1uncharacterized protein LOC100825224                                       |
| TCONS_00036296 | -0.574889 | -2.05521  | -0.0150262 | BGIOSGA013293 | XP_004962981.1polyadenylate-binding protein, cytoplasmic and nuclear isoform X1          |
| TCONS_00017190 | -0.574846 | -1.64101  | -2.02056   | BGIOSGA019234 | XP_004977104.1probable GTP diphosphokinase CRSH1, chloroplastic                          |
| TCONS_00005182 | -0.57482  | 1.2548    | 0.512051   | BGIOSGA032004 | XP_004960534.1pumilio homolog 1                                                          |
| TCONS_00027182 | -0.574705 | -0.861805 | -1.85361   | BGIOSGA018004 | XP_006659727.2 ascorbate-specific transmembrane electron transporter 1-like              |
| TCONS_00006446 | -0.574468 | -0.313632 | 0.818721   | BGIOSGA036589 | XP_006647501.1 phosphatidyl-N-methylethanolamine N-methyltransferase                     |
| TCONS_00024678 | -0.574454 | 0.525479  | -0.52433   | BGIOSGA009634 | XP_006650737.1 40S ribosomal protein S15                                                 |
| TCONS_00002466 | -0.574113 | -0.655257 | -2.29025   | BGIOSGA018894 | XP_004971167.1tropinone reductase homolog At5g06060                                      |
| TCONS_00037338 | -0.573746 | -0.402492 | 0.0835307  | BGIOSGA019666 | XP_021307843.1putative disease resistance RPP13-like protein 3                           |
| TCONS_00014899 | -0.573613 | -0.184836 | 0.324461   | BGIOSGA017080 | XP_006653748.1 zinc finger CCCH domain-containing protein 13                             |
| TCONS_00010886 | -0.573228 | -2.70288  | #NA        | #N/A          | #N/A                                                                                     |
| TCONS_00012477 | -0.573228 | 1.51951   | 0.393664   | #N/A          | #N/A                                                                                     |
| TCONS_00028340 | -0.572904 | -0.950673 | -1.18589   | BGIOSGA029493 | XP_006660305.2PREDICTED: uncharacterized protein LOC102704831 isoform X1                 |
| TCONS_00014745 | -0.572763 | -1.87744  | 0.0904648  | BGIOSGA037389 | XP_003581527.1protein S-acyltransferase 10                                               |
| TCONS_00008876 | -0.572494 | -0.222899 | -1.00477   | BGIOSGA021607 | XP_006647969.1 pentatricopeptide repeat-containing protein At1g05750, chloroplastic      |
| TCONS_00011914 | -0.571418 | -0.236833 | -0.172636  | BGIOSGA035213 | XP_015690230.1 long chain base biosynthesis protein 1a                                   |
| TCONS_00002712 | -0.571329 | -0.669391 | -0.419338  | BGIOSGA002522 | XP_015692190.1 HBS1-like protein isoform X2                                              |
| TCONS_00011494 | -0.571241 | 0.379799  | -2.69757   | BGIOSGA011532 | XP_004985869.1uncharacterized protein LOC101755828 isoform X3                            |
| TCONS_00002028 | -0.571214 | -1.4043   | -0.899875  | BGIOSGA037746 | XP_007146213.1hypothetical protein PHAVU_006G021800g                                     |
| TCONS_00022881 | -0.57103  | -1.45022  | -0.49348   | BGIOSGA024837 | XP_022684357.1disease resistance protein RGA2 isoform X1                                 |
| TCONS_00014964 | -0.571027 | 0.257377  | 0.0274266  | BGIOSGA027515 | XP_006652843.1 nucleolin 2-like                                                          |
| TCONS_00023703 | -0.570949 | -0.9217   | 0.496801   | BGIOSGA035322 | XP_004957773.1putative casein kinase II subunit beta-4 isoform X3                        |
| TCONS_00034123 | -0.570875 | -0.86267  | -0.843084  | BGIOSGA036806 | XP_006663712.1 SAM50-like protein SPAC17C9.06                                            |
| TCONS_00002251 | -0.570833 | -2.24851  | -1.04739   | BGIOSGA037065 | XP_006645086.1 zinc finger protein STOP1 homolog                                         |
| TCONS_00014417 | -0.570792 | -0.380627 | -1.42505   | BGIOSGA016580 | XP_015692303.1 agmatine deiminase                                                        |
| TCONS_00036253 | -0.570259 | -0.91171  | -0.91041   | BGIOSGA037612 | XP_015698674.1PREDICTED: uncharacterized protein LOC102700851                            |
| TCONS_00017178 | -0.569971 | -0.435982 | -0.971419  | BGIOSGA003417 | XP_006654077.1 Golgi apparatus membrane protein-like protein ECHIDNA                     |

transcriptome

|                |           |            |            |               |                                                                                                      |
|----------------|-----------|------------|------------|---------------|------------------------------------------------------------------------------------------------------|
| TCONS_00034935 | -0.569675 | 1.29336    | 0.529155   | BGIOSGA012493 | XP_006649980.1 probable pre-mRNA-splicing factor ATP-dependent RNA helicase DEAH2                    |
| TCONS_00011917 | -0.569667 | -1.78999   | 0.350151   | BGIOSGA005376 | XP_006651224.1 agamous-like MADS-box protein AGL29                                                   |
| TCONS_00005292 | -0.569439 | -1.05034   | -1.25687   | BGIOSGA021704 | XP_006646794.1 choline/ethanolaminephosphotransferase 1-like                                         |
| TCONS_00034381 | -0.569177 | -1.96404   | -1.66506   | BGIOSGA014876 | XP_022685187.1 filament-like plant protein 6                                                         |
| TCONS_00016165 | -0.568658 | -0.385808  | -1.28077   | BGIOSGA014814 | XP_006652465.1 transcription factor RF2a-like                                                        |
| TCONS_00014444 | -0.568658 | -1.12277   | 0.719226   | #N/A          | #N/A                                                                                                 |
| TCONS_00016829 | -0.568336 | 0.876878   | 0.303366   | BGIOSGA014135 | XP_015691719.1 PREDICTED: uncharacterized protein LOC107304046                                       |
| TCONS_00002236 | -0.568269 | -1.20895   | -0.0959578 | BGIOSGA017983 | XP_006665040.1 polypyrimidine tract-binding protein homolog 3-like                                   |
| TCONS_00026352 | -0.568059 | 0.603406   | 0.252756   | BGIOSGA009669 | XP_015695564.1 pentatricopeptide repeat-containing protein At5g65560-like                            |
| TCONS_00030668 | -0.568011 | 0.12492    | -1.04002   | BGIOSGA032495 | XP_014756261.1 disease resistance protein RGA2                                                       |
| TCONS_00009186 | -0.567896 | -0.687099  | -1.71649   | BGIOSGA033295 | XP_015691099.1 PREDICTED: uncharacterized protein LOC102711510 isoform X2                            |
| TCONS_00030119 | -0.567848 | -0.0579256 | 0.46591    | BGIOSGA007788 | XP_015696659.1 aldehyde dehydrogenase family 7 member A1                                             |
| TCONS_00021796 | -0.567762 | -0.83688   | -1.11504   | BGIOSGA028430 | XP_015690871.1 25.3 kDa vesicle transport protein                                                    |
| TCONS_00012460 | -0.567487 | -1.37898   | -0.0745346 | BGIOSGA010525 | XP_006650199.1 protein SPIRAL1-like 1                                                                |
| TCONS_00008071 | -0.567449 | -1.28923   | -0.798491  | BGIOSGA002221 | XP_021316288.1 trimeric transcription factor ASR3                                                    |
| TCONS_00028916 | -0.567412 | 0.197805   | 1.30101    | BGIOSGA013832 | NP_001152332.1 catalytic/ ligase                                                                     |
| TCONS_00016973 | -0.56741  | -1.54484   | #N/A       | BGIOSGA005263 | XP_006653956.1 protein DEHYDRATION-INDUCED 19 homolog 6-like                                         |
| TCONS_00024945 | -0.56741  | 0.179964   | 0.111483   | BGIOSGA033292 | XP_003571978.2 probable S-adenosyl-L-methionine-dependent RNA methyltransferase RSM22, mitochondrial |
| TCONS_00011866 | -0.567393 | -0.330576  | -0.0342109 | BGIOSGA011142 | XP_015690962.1 bZIP transcription factor 16-like isoform X1                                          |
| TCONS_00033562 | -0.567252 | 0.759234   | 0.913662   | BGIOSGA000205 | XP_006663480.1 coiled-coil domain-containing protein SCD2-like                                       |
| TCONS_00036534 | -0.567131 | -0.896897  | 0.41031    | BGIOSGA030362 | XP_022680397.1 uncharacterized protein LOC111256472                                                  |
| TCONS_00011172 | -0.566907 | -1.56476   | -1.69681   | BGIOSGA013775 | XP_006650759.1 PREDICTED: uncharacterized protein LOC102720414                                       |
| TCONS_00038886 | -0.566838 | 0.2621     | -0.371189  | BGIOSGA000749 | XP_010240583.2 exocyst complex component EXO70A1 isoform X1                                          |
| TCONS_00037291 | -0.566827 | -0.207217  | 0.377533   | BGIOSGA019930 | XP_006664071.1 probable histone H2AXb                                                                |
| TCONS_00029192 | -0.566534 | 0.193005   | -1.1793    | BGIOSGA030939 | XP_006660727.1 queuine tRNA-ribosyltransferase-like                                                  |
| TCONS_00016595 | -0.566375 | -0.672317  | -0.415544  | BGIOSGA024242 | XP_010914336.1 potassium transporter 7-like isoform X2                                               |
| TCONS_00002127 | -0.566066 | -0.472679  | -0.446556  | BGIOSGA017906 | XP_015699313.1 SAC3 family protein A isoform X1                                                      |
| TCONS_00024115 | -0.565271 | -0.365331  | 0.883815   | BGIOSGA026149 | XP_006657963.1 vacuolar protein sorting-associated protein 27 isoform X1                             |
| TCONS_00014399 | -0.56524  | 0.534268   | -0.243892  | BGIOSGA016562 | XP_015692369.1 putative pentatricopeptide repeat-containing protein At1g09680                        |
| TCONS_00031095 | -0.565097 | -1.48038   | -1.19129   | BGIOSGA032915 | XP_006661776.2 acylamino-acid-releasing enzyme-like                                                  |
| TCONS_00024661 | -0.565041 | 0.622102   | -0.160593  | BGIOSGA016475 | XP_006657498.1 B11-like protein                                                                      |
| TCONS_00004995 | -0.565038 | 0.234683   | -0.159735  | BGIOSGA000225 | XP_015699196.1 PREDICTED: uncharacterized protein LOC102713792 isoform X1                            |
| TCONS_00030245 | -0.56476  | -0.970684  | -0.892624  | BGIOSGA032130 | XP_002441414.1 anthocyanidin 3-O-glucosyltransferase 2                                               |
| TCONS_00016382 | -0.56471  | 0.292287   | -0.0101037 | BGIOSGA033425 | XP_006652620.1 putative glucuronosyltransferase PGSI8 isoform X1                                     |
| TCONS_00019994 | -0.564425 | -0.881792  | 1.11725    | BGIOSGA009624 | XP_006648157.1 DEAD-box ATP-dependent RNA helicase 48                                                |
| TCONS_00034610 | -0.564297 | -1.00952   | -0.64711   | BGIOSGA034207 | XP_014757471.1 protein AUXIN-REGULATED GENE INVOLVED IN ORGAN SIZE                                   |
| TCONS_00032354 | -0.564229 | -0.369987  | 0.256885   | BGIOSGA024245 | XP_015697010.1 midasin                                                                               |
| TCONS_00000402 | -0.564105 | -0.0645108 | -0.747567  | BGIOSGA004447 | XP_006643893.2 SCAR-like protein 2                                                                   |
| TCONS_00003168 | -0.563928 | 0.048662   | -0.249051  | BGIOSGA025368 | XP_006643964.1 transcription factor bHLH13                                                           |
| TCONS_00004600 | -0.563541 | -0.709083  | -0.557793  | BGIOSGA035556 | XP_015698047.1 putative disease resistance RPP13-like protein 3 isoform X1                           |
| TCONS_00000055 | -0.563486 | -1.12868   | -1.01572   | BGIOSGA002621 | XP_006643656.2 deoxynucleoside triphosphate triphosphohydrolase SAMHD1 homolog                       |
| TCONS_00010506 | -0.563374 | -3.03545   | -1.29419   | BGIOSGA013113 | XP_015689969.1 serpin-ZXA                                                                            |
| TCONS_00023176 | -0.563374 | -1.29462   | -0.347259  | BGIOSGA013882 | XP_006657484.1 glucan endo-1,3-beta-glucosidase 8                                                    |
| TCONS_00018278 | -0.563231 | 0.533654   | 0.445631   | BGIOSGA020339 | XP_006654760.1 60S ribosomal protein L35a-2                                                          |
| TCONS_00014210 | -0.562752 | -0.910534  | -0.958243  | BGIOSGA029643 | XP_015691820.1 alpha carbonic anhydrase 1, chloroplastic-like                                        |
| TCONS_00000584 | -0.562583 | -0.204629  | 0.51139    | BGIOSGA003169 | XP_015688106.1 PREDICTED: uncharacterized protein LOC102715257                                       |
| TCONS_00021696 | -0.562566 | 0.447324   | 0.434712   | BGIOSGA024479 | XP_006655832.2 zinc finger CCHC domain-containing protein 40                                         |
| TCONS_00003519 | -0.562268 | 0.446499   | 0.446476   | BGIOSGA036044 | XP_015688216.1 auxilin-related protein 2-like                                                        |
| TCONS_00018465 | -0.562253 | -0.846716  | -0.40813   | BGIOSGA024746 | XP_006653950.1 PREDICTED: uncharacterized protein LOC102711699 isoform X1                            |
| TCONS_00028775 | -0.562232 | -0.622687  | -0.576474  | BGIOSGA020592 | XP_006656439.2 26S proteasome non-ATPase regulatory subunit 2 homolog A-like                         |
| TCONS_00024680 | -0.561877 | 0.136563   | 1.60061    | BGIOSGA024704 | XP_015695276.1 PREDICTED: uncharacterized protein LOC102707324 isoform X1                            |
| TCONS_00019390 | -0.561804 | -0.371942  | 0.211198   | BGIOSGA010085 | XP_006654473.2 glucan endo-1,3-beta-glucosidase 14                                                   |
| TCONS_00016418 | -0.561757 | -0.995706  | -2.12003   | BGIOSGA018471 | XP_006652643.1 lysine histidine transporter-like 8                                                   |

transcriptome

|                |           |            |            |               |                                                                                                      |
|----------------|-----------|------------|------------|---------------|------------------------------------------------------------------------------------------------------|
| TCONS_00035989 | -0.561539 | -1.04225   | -0.360743  | BGIOSGA001288 | XP_006664011.1PREDICTED: uncharacterized protein LOC102716362                                        |
| TCONS_00000438 | -0.561395 | -0.247312  | -0.52401   | BGIOSGA017955 | XP_006660456.1 protein ROS1-like                                                                     |
| TCONS_00030400 | -0.561275 | 0.454018   | -1.2995    | #N/A          | #N/A                                                                                                 |
| TCONS_00011446 | -0.561153 | -0.58633   | 0.539651   | BGIOSGA000670 | XP_006650975.1 bifunctional fucokinase/fucose pyrophosphorylase                                      |
| TCONS_00002451 | -0.560866 | 0.515881   | -0.723306  | BGIOSGA009433 | XP_006645267.2 random slug protein 5-like<br>XP_006664838.1 calcium-dependent protein kinase 16-like |
| TCONS_00024963 | -0.560782 | -0.274947  | -0.247988  | BGIOSGA007434 | XP_015690718.1 putative transporter arsB isoform X1                                                  |
| TCONS_00011562 | -0.560555 | 0.707012   | 0.0331987  | BGIOSGA033055 | XP_006664916.1 structural maintenance of chromosomes protein 6B-like                                 |
| TCONS_00028553 | -0.560546 | -0.900985  | -0.742818  | BGIOSGA030299 | XP_006664020.1 L-galactose dehydrogenase                                                             |
| TCONS_00037185 | -0.559715 | -1.34212   | -0.450041  | BGIOSGA036192 | XP_004980118.1calcium uniporter protein 6, mitochondrial                                             |
| TCONS_00035492 | -0.559683 | -0.900273  | -1.2005    | BGIOSGA000595 | XP_006651712.1PREDICTED: uncharacterized protein LOC102702550, partial                               |
| TCONS_00012981 | -0.559575 | -2.59238   | -0.515326  | BGIOSGA010010 | #N/A                                                                                                 |
| TCONS_00010326 | -0.559535 | -1.73518   | 0.163842   | #N/A          | #N/A                                                                                                 |
| TCONS_00017613 | -0.55948  | -0.453911  | -0.76638   | BGIOSGA019674 | XP_006655223.1 anaphase-promoting complex subunit 1                                                  |
| TCONS_00002402 | -0.559461 | -0.322064  | -0.426393  | BGIOSGA033336 | XP_015688181.1 protein YLS7-like<br>XP_006661117.1 nudix hydrolase 20, chloroplastic-like            |
| TCONS_00029820 | -0.559354 | -2.23041   | -0.38834   | BGIOSGA029994 | XP_006660857.1 hydroxymethylglutaryl-CoA synthase-like                                               |
| TCONS_00029362 | -0.559352 | -0.702013  | -0.488986  | BGIOSGA011729 | XP_004954179.1cyclic nucleotide-gated ion channel 17                                                 |
| TCONS_00008945 | -0.559226 | -0.452771  | -1.57336   | BGIOSGA031253 | XP_002457586.1protein SENESCENCE-ASSOCIATED GENE 21, mitochondrial                                   |
| TCONS_00003250 | -0.559189 | -1.29882   | 0.34681    | BGIOSGA003300 | XP_006654040.2 nucleolar MIF4G domain-containing protein 1                                           |
| TCONS_00017124 | -0.559141 | -0.762309  | -0.0648388 | BGIOSGA019172 | XP_006648489.2 aspartate aminotransferase, mitochondrial-like                                        |
| TCONS_00005736 | -0.559046 | -0.291615  | 0.150694   | BGIOSGA000783 | XP_006647965.2PREDICTED: uncharacterized protein LOC102699842, partial                               |
| TCONS_00008864 | -0.558935 | -0.159594  | -0.881023  | BGIOSGA005548 |                                                                                                      |
| TCONS_00009490 | -0.558915 | 0.746794   | 0.251028   | BGIOSGA016456 | XP_006651129.1 cytochrome b561 and DOMON domain-containing protein At4g12980-like                    |
| TCONS_00028810 | -0.558238 | -0.997332  | -1.6963    | BGIOSGA030561 | XP_003578003.1sulfite exporter TauE/SafE family protein 3                                            |
| TCONS_00036918 | -0.558069 | -0.0716418 | -0.425841  | BGIOSGA036407 | XP_003578739.1exocyst complex component 5                                                            |
| TCONS_00022855 | -0.557436 | -0.447777  | -0.948846  | BGIOSGA020639 | XP_006656442.1 putative inactive cadmium/zinc-transporting ATPase HMA3                               |
| TCONS_00003058 | -0.557142 | -0.279474  | -0.213267  | BGIOSGA029757 | XP_006643888.2 shaggy-related protein kinase eta-like                                                |
| TCONS_00002783 | -0.557092 | 0.601013   | -0.310101  | #N/A          | #N/A                                                                                                 |
| TCONS_00022106 | -0.556993 | 0.833551   | 0.274613   | BGIOSGA021398 | XP_006656029.1 protein translocase subunit SecA                                                      |
| TCONS_00027637 | -0.556993 | -1.55111   | -1.50299   | BGIOSGA037345 | XP_015695540.1PREDICTED: uncharacterized protein LOC107304708                                        |
| TCONS_00017131 | -0.556896 | 0.60077    | 2.33326    | BGIOSGA001630 | XP_004960283.1probable glutathione S-transferase GSTF1                                               |
| TCONS_00034742 | -0.556869 | 0.136502   | -1.81733   | BGIOSGA015955 | XP_006662877.1 ABC transporter G family member 28-like                                               |
| TCONS_00007964 | -0.556705 | -0.0209534 | -1.50372   | BGIOSGA006517 | XP_021307930.1U4/U6.U5 small nuclear ribonucleoprotein 27 kDa protein                                |
| TCONS_00036619 | -0.556248 | 1.33905    | 0.286136   | BGIOSGA034563 | XP_006662707.1 glutamine--fructose-6-phosphate aminotransferase [isomerizing] 2-like                 |
| TCONS_00006447 | -0.556226 | -0.214315  | 0.102116   | BGIOSGA022042 | XP_003572710.2calcium uptake protein, mitochondrial                                                  |
| TCONS_00001495 | -0.556213 | -2.24479   | -0.685282  | BGIOSGA004137 | XP_006646160.2 probable plastid-lipid-associated protein 14, chloroplastic                           |
| TCONS_00014315 | -0.556033 | -1.7708    | -3.14695   | BGIOSGA016479 | XP_015691473.1 ferric reduction oxidase 7, chloroplastic-like                                        |
| TCONS_00006165 | -0.55588  | 0.34703    | 0.624957   | #N/A          | #N/A                                                                                                 |
| TCONS_00000295 | -0.55579  | -0.496924  | -1.13589   | BGIOSGA019320 | XP_015699259.1 ABC transporter C family member 3-like                                                |
| TCONS_00018287 | -0.555774 | -0.545054  | 1.51691    | BGIOSGA020341 | XP_015693180.1PREDICTED: uncharacterized protein LOC102715305                                        |
| TCONS_00019534 | -0.555752 | -0.741689  | -2.65452   | BGIOSGA003020 | XP_015692641.1 non-specific lipid transfer protein GPI-anchored 2-like                               |
| TCONS_00023935 | -0.555689 | -0.221921  | 0.597261   | BGIOSGA025966 | XP_006657852.2 nodulation receptor kinase-like                                                       |
| TCONS_00013097 | -0.555671 | -0.983188  | -1.04966   | BGIOSGA009884 | XP_002463955.1sulfite exporter TauE/SafE family protein 4                                            |
| TCONS_00016961 | -0.555594 | -1.25633   | -0.556144  | BGIOSGA019012 | XP_006653948.1 tubulin-folding cofactor E                                                            |
| TCONS_00027373 | -0.555593 | 1.11314    | -0.0130282 | BGIOSGA037365 | XP_006659135.1 protein PAF1 homolog                                                                  |
| TCONS_00003095 | -0.555492 | -0.784449  | 0.647385   | BGIOSGA002167 | XP_006643903.1 GDSL esterase/lipase At5g45920-like                                                   |
| TCONS_00003742 | -0.555172 | 0.353846   | -0.103391  | BGIOSGA007462 | XP_024315768.1DNA damage-repair/tolerance protein DRT102                                             |
| TCONS_00017863 | -0.555144 | -2.72334   | #N/A       | BGIOSGA014836 | XP_015688131.1 protein PHYTOCHROME KINASE SUBSTRATE 4                                                |
| TCONS_00025546 | -0.555098 | -0.866929  | -0.41037   | BGIOSGA011302 | XP_015695237.1 calmodulin-binding transcription activator 1-like isoform X1                          |
| TCONS_00032822 | -0.555002 | 1.92034    | 0.491988   | BGIOSGA009635 | XP_006663719.1 PRA1 family protein B2-like                                                           |
| TCONS_00036758 | -0.554979 | 0.474386   | 0.0438047  | BGIOSGA036558 | XP_015698755.1 V-type proton ATPase 16 kDa proteolipid subunit-like                                  |
| TCONS_00034188 | -0.554932 | 0.861354   | -0.145617  | BGIOSGA004690 | XP_006663759.1 protein LURP-one-related 8-like                                                       |
| TCONS_00026788 | -0.554932 | -1.46985   | -0.846057  | BGIOSGA028850 | XP_006659496.1 uncharacterized oxidoreductase YoxD isoform X1                                        |
| TCONS_00008350 | -0.554796 | -1.13882   | 0.610114   | BGIOSGA000828 | XP_008643956.1putative integrin-linked protein kinase family protein isoform X1                      |

## transcriptome

|                |           |            |             |               |                                                                                              |
|----------------|-----------|------------|-------------|---------------|----------------------------------------------------------------------------------------------|
| TCONS_00018310 | -0.554729 | -0.308827  | 0.00587402  | BGIOSGA015674 | XP_002440250.1 protein N-lysine methyltransferase METTL21A                                   |
| TCONS_00014330 | -0.554668 | 0.914302   | -0.894      | BGIOSGA028973 | XP_010239962.1 putative lipoxigenase 5                                                       |
| TCONS_00009497 | -0.554559 | -0.389854  | -2.27119    | BGIOSGA012048 | XP_006651134.2 vicilin-like seed storage protein                                             |
| TCONS_00018513 | -0.554512 | 2.75908    | 0.321145    | #N/A          | #N/A                                                                                         |
| TCONS_00005572 | -0.554396 | -1.92216   | -0.8179     | BGIOSGA017000 | XP_006646991.2 premmaspirodiene oxygenase-like                                               |
| TCONS_00004497 | -0.554378 | -1.50431   | -1.18466    | BGIOSGA019168 | XP_015694266.1 jacalin-related lectin 3                                                      |
| TCONS_00035419 | -0.554132 | -1.65767   | -0.563898   | BGIOSGA026403 | XP_003558758.1 mediator of RNA polymerase II transcription subunit 34 isoform X1             |
| TCONS_00015904 | -0.554039 | -0.335075  | -0.788549   | BGIOSGA006279 | NP_001147920.1 neutral/alkaline invertase                                                    |
| TCONS_00009445 | -0.553752 | -1.07142   | -1.22586    | BGIOSGA014282 | XP_006649512.2 protein STRUBBELIG-RECEPTOR FAMILY 7-like                                     |
| TCONS_00019644 | -0.553641 | 0.445194   | 0.0564545   | BGIOSGA014099 | XP_006654660.1 dolichyl-diphosphooligosaccharide--protein glycosyltransferase subunit STT3A  |
| TCONS_00015526 | -0.553461 | -1.00819   | -0.97467    | BGIOSGA015454 | XP_015692124.1 NAD-dependent protein deacetylase SRT1 isoform X1                             |
| TCONS_00033867 | -0.553442 | -3.72549   | -3.31928    | BGIOSGA035572 | XP_004979775.1 protein PYRICULARIA ORYZAE RESISTANCE 21                                      |
| TCONS_00023707 | -0.552956 | -1.14115   | 0.849428    | BGIOSGA025746 | XP_006657721.1 expansin-like B1                                                              |
| TCONS_00024391 | -0.552661 | -1.14006   | -0.00548615 | BGIOSGA012465 | XP_004958766.1 probable glutamyl endopeptidase, chloroplastic isoform X1                     |
| TCONS_00007355 | -0.552636 | -1.34327   | -0.417301   | BGIOSGA022934 | XP_022684723.1 probable LRR receptor-like serine/threonine-protein kinase At1g05700          |
| TCONS_00004991 | -0.552548 | -0.287087  | -0.20537    | BGIOSGA009018 | XP_006645253.2 probable histidine kinase 3                                                   |
| TCONS_00009614 | -0.552223 | -2.7487    | -2.82408    | BGIOSGA009133 | XP_006649663.1 metal tolerance protein 4                                                     |
| TCONS_00011391 | -0.5522   | -0.580222  | -0.271758   | BGIOSGA035370 | XP_006650938.1 protein TORNAO 2-like                                                         |
| TCONS_00037031 | -0.551871 | 0.231016   | -0.153996   | BGIOSGA036344 | XP_006663957.2 quinolinate synthase, chloroplastic                                           |
| TCONS_00016269 | -0.551581 | -0.514431  | -0.708846   | BGIOSGA005999 | XP_006652522.1 phenylalanine ammonia-lyase-like                                              |
| TCONS_00022074 | -0.551573 | -3.92343   | -1.75122    | BGIOSGA002857 | XP_003563952.10-fucosyltransferase 34                                                        |
| TCONS_00000411 | -0.551411 | 1.35165    | -1.01221    | BGIOSGA025960 | XP_003565462.1 sodium/calcium exchanger NCL1                                                 |
| TCONS_00019950 | -0.551256 | 0.159269   | -0.324737   | BGIOSGA022105 | XP_006655680.2 NADH dehydrogenase (ubiquinone) complex I, assembly factor 6                  |
| TCONS_00038183 | -0.551197 | -1.72833   | #N/A        | BGIOSGA002510 | XP_014754607.2 rust resistance kinase Lr10                                                   |
| TCONS_00008644 | -0.55102  | -0.665826  | -0.6347     | BGIOSGA014409 | XP_015689291.1 dual specificity tyrosine-phosphorylation-regulated kinase 1B-like isoform X2 |
| TCONS_00022351 | -0.550999 | 0.271419   | 0.762086    | BGIOSGA015367 | XP_006656133.2 probable protein phosphatase 2C 56                                            |
| TCONS_00009193 | -0.550972 | 0.934349   | 0.089592    | BGIOSGA035393 | XP_015691285.1 probable glycosidase crf1                                                     |
| TCONS_00004866 | -0.550956 | -2.45459   | -0.862629   | BGIOSGA000354 | XP_010232674.1 DNA-directed RNA polymerase III subunit RPC4 isoform X1                       |
| TCONS_00000296 | -0.55066  | -1.43355   | 0.462274    | BGIOSGA003689 | XP_015699356.1 monothiol glutaredoxin-S4, mitochondrial                                      |
| TCONS_00005037 | -0.550635 | -0.0660756 | -0.589318   | BGIOSGA014110 | XP_021310923.1 coleoptile phototropism protein 1                                             |
| TCONS_00005739 | -0.55061  | -3.899     | -1.32634    | BGIOSGA010666 | XP_003571154.1 peroxidase P7                                                                 |
| TCONS_00016819 | -0.550444 | -1.99232   | -0.589792   | BGIOSGA017320 | XP_006652980.1 hycoscyamine 6-dioxygenase-like                                               |
| TCONS_00031905 | -0.550421 | -0.586352  | -1.00489    | #N/A          | #N/A                                                                                         |
| TCONS_00016710 | -0.550331 | -3.72942   | -0.519684   | BGIOSGA014252 | XP_006648582.1 PREDICTED: uncharacterized protein LOC102706077                               |
| TCONS_00029176 | -0.550179 | -2.23212   | -0.556899   | BGIOSGA031661 | XP_006660711.1 polyadenylate-binding protein RBP47-like                                      |
| TCONS_00011132 | -0.549802 | 0.00030272 | 0.0701982   | BGIOSGA009990 | XP_006651908.2 E3 ubiquitin protein ligase DRIP2-like                                        |
| TCONS_00003132 | -0.549765 | -1.08628   | 1.13099     | BGIOSGA002092 | XP_003565805.13-methyl-2-oxobutanoate hydroxymethyltransferase 1, mitochondrial              |
| TCONS_00023041 | -0.549729 | 2.26982    | 2.11441     | BGIOSGA029777 | XP_006658240.1 PREDICTED: uncharacterized protein LOC102721465                               |
| TCONS_00001366 | -0.549554 | 2.05096    | 1.256       | BGIOSGA006706 | XP_006646049.2 pentatricopeptide repeat-containing protein At4g36680, mitochondrial-like     |
| TCONS_00026791 | -0.549439 | -0.31551   | 0.173248    | BGIOSGA011644 | XP_003574635.1 protein transport protein sec31                                               |
| TCONS_00002120 | -0.549359 | 0.633175   | -0.0919712  | BGIOSGA012245 | XP_006644966.1 V-type proton ATPase subunit a1                                               |
| TCONS_00019946 | -0.549316 | 0.416692   | -0.150464   | BGIOSGA022132 | XP_006655676.1 peroxisomal acyl-coenzyme A oxidase 1-like                                    |
| TCONS_00002200 | -0.549313 | 1.75656    | -0.230029   | BGIOSGA016731 | XP_006646495.1 sialyltransferase-like protein 1                                              |
| TCONS_00018156 | -0.549237 | #N/A       | -2.91472    | BGIOSGA006676 | XP_006654665.1 probable pectinesterase 53                                                    |
| TCONS_00005486 | -0.549207 | -1.18869   | -1.49029    | BGIOSGA018019 | XP_006646915.1 probable beta-1,3-galactosyltransferase 2                                     |
| TCONS_00002245 | -0.549149 | -1.50852   | -1.04046    | BGIOSGA005815 | XP_006647706.1 phosphatidylinositol glycan anchor biosynthesis class U protein-like          |
| TCONS_00033018 | -0.549023 | -1.73107   | -0.593317   | BGIOSGA037038 | XP_008679695.1 nodulation-signaling pathway 2 protein                                        |
| TCONS_00032455 | -0.548965 | -0.71818   | -0.894319   | BGIOSGA031662 | XP_006662455.2 PREDICTED: uncharacterized protein LOC102721679, partial                      |
| TCONS_00008630 | -0.548934 | -1.25527   | -0.658352   | BGIOSGA027474 | XP_024314258.1 uncharacterized protein LOC100840408                                          |
| TCONS_00028703 | -0.548878 | -0.643791  | -1.16072    | BGIOSGA016488 | XP_006661083.2 peptidyl-prolyl cis-trans isomerase FKBP43-like isoform X1                    |
| TCONS_00001683 | -0.548635 | #N/A       | -3.91621    | BGIOSGA026329 | XP_024313850.1 uncharacterized protein LOC112270208                                          |
| TCONS_00028819 | -0.548396 | -0.653857  | -1.25383    | BGIOSGA030568 | XP_006661144.1 probable histone acetyltransferase type B catalytic subunit isoform X1        |
| TCONS_00028510 | -0.548326 | -2.83148   | -0.715336   | BGIOSGA029013 | XP_006651552.2 RNA pseudouridine synthase 4, mitochondrial-like                              |
| TCONS_00010281 | -0.548323 | 0.575249   | 0.0349826   | BGIOSGA023910 | XP_002463173.160S ribosomal protein L27a-3                                                   |



## transcriptome

|                |           |            |            |              |                                                                                               |
|----------------|-----------|------------|------------|--------------|-----------------------------------------------------------------------------------------------|
| TCONS_00002390 | -0.548298 | 0.320832   | -0.148181  | BGIOGA005026 | XP_015698304.1 dolichyl-diphosphooligosaccharide--protein glycosyltransferase subunit 2       |
| TCONS_00034112 | -0.547672 | -0.0589976 | -0.576194  | BGIOGA038661 | XP_006664262.1PREDICTED: uncharacterized protein LOC102719542                                 |
| TCONS_00009386 | -0.547625 | 0.45426    | 1.18658    | BGIOGA031942 | XP_015689776.1 IQ domain-containing protein IQM2-like                                         |
| TCONS_00028895 | -0.547464 | 0.726401   | 0.617608   | BGIOGA030639 | XP_006660581.2 MND1-interacting protein 1-like                                                |
| TCONS_00018858 | -0.547406 | 0.378973   | 0.385983   | BGIOGA010008 | XP_010231332.1 uncharacterized protein LOC100845944                                           |
| TCONS_00027794 | -0.547139 | -0.0238847 | -0.322861  | BGIOGA028437 | XP_015696027.1 exocyst complex component SEC8 isoform X2                                      |
| TCONS_00035667 | -0.547117 | 0.91039    | 0.337433   | BGIOGA034932 | XP_003578845.1SWI/SNF complex subunit SWI3C                                                   |
| TCONS_00004408 | -0.546997 | -1.51122   | -1.54174   | BGIOGA007153 | XP_006646331.2 auxin response factor 3                                                        |
| TCONS_00025685 | -0.546785 | -0.663492  | -0.850382  | BGIOGA005535 | XP_006658950.1 pentatricopeptide repeat-containing protein At4g32430, mitochondrial           |
| TCONS_00018018 | -0.546685 | -0.762204  | 0.439303   | BGIOGA005483 | XP_002439976.1 uncharacterized protein LOC8077017                                             |
| TCONS_00030984 | -0.546491 | 0.785124   | 0.23231    | BGIOGA033570 | XP_015697929.1 disease resistance protein RPP13-like                                          |
| TCONS_00002677 | -0.546402 | -0.734362  | 0.155101   | BGIOGA002544 | XP_008646447.1AP-5 complex subunit beta-1                                                     |
| TCONS_00022146 | -0.546371 | -2.01194   | -1.70456   | BGIOGA021358 | XP_006656922.2 protein WEAK CHLOROPLAST MOVEMENT UNDER BLUE LIGHT 1-like                      |
| TCONS_00013066 | -0.546182 | 0.773158   | -0.051891  | BGIOGA014054 | XP_015690041.1 receptor protein kinase TMK1-like                                              |
| TCONS_00013413 | -0.545836 | -1.93423   | -0.890896  | BGIOGA009569 | XP_015690685.1 U-box domain-containing protein 62-like                                        |
| TCONS_00001806 | -0.545656 | -1.14201   | 0.158406   | BGIOGA021596 | XP_015688329.1 pseudo histidine-containing phosphotransfer protein 1                          |
| TCONS_00023331 | -0.545573 | 0.608444   | 0.778663   | BGIOGA013783 | XP_004981345.140S ribosomal protein S2-3                                                      |
| TCONS_00006872 | -0.545507 | -2.11793   | -2.02519   | BGIOGA000885 | XP_006647886.1 HVA22-like protein a                                                           |
| TCONS_00020193 | -0.545318 | -1.4299    | -0.737048  | BGIOGA022384 | XP_004964739.1probable LRR receptor-like serine/threonine-protein kinase At1g56130 isoform X1 |
| TCONS_00008132 | -0.545237 | -3.59032   | -2.16724   | BGIOGA016610 | XP_004952661.1 uncharacterized protein LOC101753026                                           |
| TCONS_00015234 | -0.545119 | -1.00229   | -1.59066   | BGIOGA017420 | XP_015691673.1 probable thylakoidal processing peptidase 2, chloroplastic isoform X2          |
| TCONS_00009598 | -0.545104 | -3.18782   | -1.73882   | BGIOGA028353 | XP_015689819.1 probable inactive receptor kinase At1g48480                                    |
| TCONS_00028848 | -0.544937 | -1.73689   | -1.53933   | BGIOGA028621 | XP_015696321.1 aminopeptidase M1-D                                                            |
| TCONS_00021761 | -0.544532 | -0.648058  | -1.11971   | BGIOGA021759 | XP_006655866.1 putative UDP-sugar transporter DDB_G0278631                                    |
| TCONS_00002797 | -0.544363 | -1.17095   | -0.572724  | BGIOGA012302 | XP_002455216.1mitochondrial substrate carrier family protein B                                |
| TCONS_00006891 | -0.544271 | -0.143371  | -0.0651788 | BGIOGA031767 | XP_006647912.1PREDICTED: uncharacterized protein LOC102707374                                 |
| TCONS_00031469 | -0.54419  | 0.464702   | -0.507138  | BGIOGA020303 | XP_006661962.1 STE20/SPS1-related proline-alanine-rich protein kinase isoform X2              |
| TCONS_00022963 | -0.544164 | -0.298018  | -1.40805   | BGIOGA006370 | XP_015694500.1 potassium transporter 22-like                                                  |
| TCONS_00025135 | -0.544118 | -0.357277  | -0.631551  | BGIOGA012622 | XP_006657726.1 protein CHROMATIN REMODELING 4                                                 |
| TCONS_00022772 | -0.543977 | -1.49727   | -0.213857  | BGIOGA022468 | XP_006656378.1 auxin response factor 17                                                       |
| TCONS_00018063 | -0.543938 | -0.420267  | -0.360696  | BGIOGA025787 | XP_015692796.1 putative E3 ubiquitin-protein ligase RING1a                                    |
| TCONS_00015172 | -0.543909 | 0.0660186  | 0.180206   | BGIOGA027327 | NP_001152519.1fiber protein Fb34 precursor                                                    |
| TCONS_00009616 | -0.543806 | -0.0357621 | -0.144576  | BGIOGA032403 | NP_001333756.1 uncharacterized LOC103633237                                                   |
| TCONS_00006852 | -0.543558 | 1.42111    | -0.166686  | BGIOGA009033 | XP_015689268.1PREDICTED: uncharacterized protein LOC102719081                                 |
| TCONS_00016241 | -0.543254 | -0.86563   | -0.38527   | BGIOGA014733 | XP_015692280.1PREDICTED: LOW QUALITY PROTEIN: uncharacterized protein LOC102703674            |
| TCONS_00014555 | -0.543227 | -0.336448  | -0.814435  | BGIOGA028311 | XP_015692376.1 protein NUCLEAR FUSION DEFECTIVE 4-like                                        |
| TCONS_00003417 | -0.542911 | -0.175968  | 0.930214   | BGIOGA016998 | XP_006651596.1 LOB domain-containing protein 37-like                                          |
| TCONS_00030985 | -0.542787 | -0.955068  | -0.618601  | BGIOGA032792 | XP_006661725.1 pollen-specific protein C13                                                    |
| TCONS_00028347 | -0.5423   | -0.92018   | -0.711375  | BGIOGA026620 | XP_015695894.1 E3 ubiquitin-protein ligase RNF4-like isoform X1                               |
| TCONS_00006495 | -0.542112 | 0.0121497  | -0.945125  | BGIOGA013999 | NP_001105026.1aquaporin PIP2-4                                                                |
| TCONS_00018053 | -0.542051 | 0.330255   | -1.09112   | BGIOGA030796 | XP_003568197.1probable sugar phosphate/phosphate translocator At2g25520                       |
| TCONS_00003290 | -0.541485 | 0.0722447  | 0.275168   | BGIOGA003227 | XP_015688154.1 rab proteins geranylgeranyltransferase component A 1                           |
| TCONS_00001821 | -0.541404 | -0.942727  | 0.37852    | BGIOGA009753 | XP_006644705.1PREDICTED: uncharacterized protein LOC102715348 isoform X1                      |
| TCONS_00027473 | -0.541368 | -2.34525   | -2.12243   | BGIOGA026917 | XP_015696152.1 cinnamoyl-CoA reductase 1-like                                                 |
| TCONS_00019132 | -0.541271 | -4.06598   | 0.370505   | BGIOGA020322 | XP_006654290.1 E3 ubiquitin-protein ligase MARCH5-like                                        |
| TCONS_00003008 | -0.541255 | -1.43987   | -1.36761   | BGIOGA022272 | XP_006643870.2PREDICTED: uncharacterized protein LOC102702325, partial                        |
| TCONS_00031740 | -0.541198 | 0.25679    | -0.645787  | BGIOGA010923 | XP_015697361.1 barley B recombinant-like protein A                                            |
| TCONS_00001550 | -0.540972 | -0.0118692 | -0.51999   | BGIOGA017565 | XP_006644502.2 homeobox-DDT domain protein RLT2-like                                          |
| TCONS_00004201 | -0.540361 | -1.67715   | -0.243471  | BGIOGA001001 | XP_003569588.1caffeoylshikimate esterase                                                      |
| TCONS_00026541 | -0.539876 | -0.193108  | -0.370575  | BGIOGA028608 | XP_006659373.1 proton pump-interactor 1-like                                                  |
| TCONS_00008208 | -0.539594 | -1.97527   | -0.385977  | BGIOGA007547 | XP_006648759.2 homeobox-leucine zipper protein HOX7-like                                      |

## transcriptome

|                |           |            |             |               |                                                                                         |
|----------------|-----------|------------|-------------|---------------|-----------------------------------------------------------------------------------------|
| TCONS_00004197 | -0.539017 | -0.975998  | -0.222353   | BGIOSGA002077 | XP_006644557.2 arginine/serine-rich coiled-coil protein 2 isoform X2                    |
| TCONS_00010868 | -0.538532 | -1.09449   | -0.530395   | BGIOSGA013490 | XP_006651765.2 lariat debranching enzyme                                                |
| TCONS_00012844 | -0.538381 | -0.947281  | -0.110465   | BGIOSGA025269 | XP_002464148.1 cationic amino acid transporter 2, vacuolar isoform X2                   |
| TCONS_00023210 | -0.538359 | 0.121631   | 0.0134829   | BGIOSGA025251 | XP_006657500.1 peptidyl-prolyl cis-trans isomerase CYP63-like                           |
| TCONS_00007387 | -0.53823  | -0.936476  | -0.30371    | BGIOSGA007089 | XP_006646905.2 DEXH-box ATP-dependent RNA helicase DEXH11                               |
| TCONS_00021134 | -0.537931 | -0.387645  | -0.45654    | BGIOSGA007004 | XP_006656294.1 pyrophosphate-energized vacuolar membrane proton pump-like               |
| TCONS_00026466 | -0.537886 | -1.13757   | 0.131752    | BGIOSGA026888 | XP_006662238.1 AT-rich interactive domain-containing protein 4-like                     |
| TCONS_00037297 | -0.537851 | -0.245578  | 0.430732    | BGIOSGA018818 | XP_015698691.1 VIN3-like protein 1 isoform X2                                           |
| TCONS_00005024 | -0.537675 | -0.857733  | 0.193294    | BGIOSGA033850 | XP_006645281.2 heparan-alpha-glucosaminide N-acetyltransferase-like                     |
| TCONS_00027396 | -0.537536 | -0.263351  | 0.361189    | BGIOSGA005435 | XP_015695775.1 protein ABHD17C                                                          |
| TCONS_00007153 | -0.537529 | -0.770503  | -1.06473    | BGIOSGA009338 | XP_006649193.1 testis-expressed sequence 2 protein-like                                 |
| TCONS_00020901 | -0.537414 | -0.692366  | -0.275405   | BGIOSGA017626 | XP_003563730.1L-ascorbate oxidase                                                       |
| TCONS_00022249 | -0.536973 | -1.35408   | -1.30662    | #N/A          | #N/A                                                                                    |
| TCONS_00025515 | -0.53697  | -1.66584   | -1.37321    | BGIOSGA005501 | XP_015694843.1 nuclear transcription factor Y subunit A-7-like isoform X2               |
| TCONS_00014825 | -0.536912 | -0.888302  | -0.411029   | BGIOSGA031484 | XP_008663453.1RING-H2 finger protein ATL74                                              |
| TCONS_00036236 | -0.536902 | -1.32885   | -1.17871    | BGIOSGA007734 | XP_006664642.1 pentatricopeptide repeat-containing protein At2g31400, chloroplastic     |
| TCONS_00037393 | -0.536893 | 0.263251   | 0.37921     | BGIOSGA007844 | XP_015698727.1 protein spotted leaf 11 isoform X1                                       |
| TCONS_00005348 | -0.536611 | 0.797022   | -0.725637   | BGIOSGA007461 | NP_001168856.1 uncharacterized LOC100382661                                             |
| TCONS_00004594 | -0.536536 | -1.81945   | -0.790566   | BGIOSGA014380 | XP_015690221.1 probable LRR receptor-like serine/threonine-protein kinase At1g51810     |
| TCONS_00005347 | -0.536497 | -0.377717  | -0.308762   | BGIOSGA031300 | XP_006646832.2 beta-amylase 8-like                                                      |
| TCONS_00021593 | -0.536486 | -1.97702   | -1.23635    | BGIOSGA003978 | XP_004964513.1 putative cytochrome c oxidase subunit 5b-like                            |
| TCONS_00016593 | -0.5362   | -0.0280425 | 0.249343    | BGIOSGA013268 | XP_015692339.1 PREDICTED: uncharacterized protein LOC102720699 isoform X1               |
| TCONS_00004227 | -0.536185 | 0.565071   | 0.544348    | BGIOSGA000977 | XP_015697301.1 symplekin                                                                |
| TCONS_00025604 | -0.536165 | -1.20736   | -0.914528   | BGIOSGA018055 | XP_015694480.1 probable mediator of RNA polymerase II transcription subunit 26b         |
| TCONS_00025325 | -0.536107 | 0.0800664  | -0.455951   | BGIOSGA024103 | XP_006657824.1 equilibrative nucleotide transporter 3-like                              |
| TCONS_00003799 | -0.536058 | 0.0508155  | -0.0477318  | BGIOSGA013895 | XP_006646005.1 IAA-amino acid hydrolase ILR1-like 1                                     |
| TCONS_00030203 | -0.536053 | 1.07634    | 1.74036     | BGIOSGA025174 | XP_006660732.1 peroxidase 17                                                            |
| TCONS_00027130 | -0.536039 | -0.167719  | 0.379097    | BGIOSGA031276 | XP_006660378.2 peroxisome biogenesis protein 1                                          |
| TCONS_00021263 | -0.535827 | 0.0208935  | -0.936458   | BGIOSGA023489 | XP_006656398.1 synaptotagmin-3-like isoform X1                                          |
| TCONS_00004650 | -0.535752 | -0.734001  | -0.0298498  | BGIOSGA018268 | XP_006646440.2 target of Myb protein 1-like                                             |
| TCONS_00027778 | -0.535454 | 0.593241   | -0.492106   | BGIOSGA027218 | XP_006659291.1 protein SMG7 isoform X2                                                  |
| TCONS_00035697 | -0.535248 | -2.44911   | -5.18657    | BGIOSGA032966 | XP_006663882.1 carboxyvinyl-carboxyphosphonate phosphorylmutase, chloroplastic          |
| TCONS_00002412 | -0.534917 | 0.214014   | -0.574985   | BGIOSGA027144 | XP_006645229.1 leucine-rich repeat receptor protein kinase MSP1                         |
| TCONS_00018082 | -0.534832 | 1.80394    | -0.136122   | BGIOSGA008702 | XP_004961595.1 universal stress protein PHOS32                                          |
| TCONS_00032100 | -0.534778 | -0.9496    | 0.253213    | BGIOSGA032036 | XP_006662307.1 pyridoxine/pyridoxamine 5'-phosphate oxidase 1, chloroplastic isoform X2 |
| TCONS_00023515 | -0.534741 | -1.50944   | -1.26044    | BGIOSGA031237 | XP_006660957.1 uncharacterized transporter YBR287W-like                                 |
| TCONS_00001526 | -0.534692 | -1.13492   | -0.913821   | BGIOSGA001281 | XP_006644476.1 PREDICTED: uncharacterized protein LOC102718499                          |
| TCONS_00036661 | -0.534145 | -2.56467   | -0.689739   | BGIOSGA036651 | XP_021311068.1 uncharacterized protein LOC8062346                                       |
| TCONS_00009669 | -0.534075 | 0.0903205  | -0.303742   | BGIOSGA012214 | XP_003561826.1 acyl-CoA-binding domain-containing protein 5 isoform X1                  |
| TCONS_00009121 | -0.533903 | -0.657872  | -0.261501   | BGIOSGA023974 | NP_001336929.1 uncharacterized LOC100278565                                             |
| TCONS_00030499 | -0.533821 | -1.38195   | -0.664988   | BGIOSGA029309 | XP_023157456.1 DNA mismatch repair protein MLH3 isoform X3                              |
| TCONS_00013403 | -0.533582 | -0.879277  | -0.309096   | BGIOSGA009577 | XP_015690124.1 probable DNA gyrase subunit A, chloroplastic/mitochondrial               |
| TCONS_00027972 | -0.533089 | -0.716643  | -0.0727411  | BGIOSGA028641 | XP_022683438.1 uncharacterized protein LOC101777506                                     |
| TCONS_00020807 | -0.53284  | 0.596634   | 0.764879    | BGIOSGA012762 | XP_003567668.1 exocyst complex component SEC15B                                         |
| TCONS_00019714 | -0.532813 | -0.7115    | -0.30379    | BGIOSGA034934 | XP_021302483.1 serine/arginine repetitive matrix protein 1 isoform X3                   |
| TCONS_00004489 | -0.532712 | -2.28589   | -0.356785   | BGIOSGA020159 | XP_022680410.1 pseudouridylate synthase 7 homolog isoform X1                            |
| TCONS_00005229 | -0.532634 | -1.6467    | -0.745511   | BGIOSGA007339 | XP_006659776.2 RNA-binding protein 48-like isoform X1                                   |
| TCONS_00024935 | -0.53262  | -4.21565   | -0.229086   | BGIOSGA012992 | NP_001141382.1 uncharacterized LOC100273473                                             |
| TCONS_00000346 | -0.532393 | -1.80413   | -1.4871     | BGIOSGA027197 | XP_003565447.1 zinc finger CCCH domain-containing protein 17                            |
| TCONS_00028950 | -0.531955 | -1.01382   | -0.00380758 | BGIOSGA009342 | XP_024318842.1 lysine-specific demethylase JMJD5 isoform X1                             |
| TCONS_00009824 | -0.531655 | -0.172474  | 0.137759    | BGIOSGA012377 | XP_006651270.2 DDB1- and CUL4-associated factor 8                                       |
| TCONS_00022583 | -0.531263 | 0.122907   | -0.544816   | BGIOSGA004912 | XP_015693641.1 RNA-binding protein 38-like                                              |
| TCONS_00012994 | -0.530956 | 0.0217289  | -0.32239    | BGIOSGA017236 | XP_006650436.1 chloride channel protein CLC-d                                           |

## transcriptome

|                |           |            |            |               |                                                                                          |
|----------------|-----------|------------|------------|---------------|------------------------------------------------------------------------------------------|
| TCONS_00011166 | -0.530876 | -4.21785   | -1.49644   | BGIOSGA013772 | XP_006651935.1 protochlorophyllide-dependent translocon component 52, chloroplastic-like |
| TCONS_00005190 | -0.530818 | 0.388966   | 0.261602   | BGIOSGA000014 | XP_006645401.1 PREDICTED: uncharacterized protein LOC102706703 isoform X1                |
| TCONS_00021146 | -0.530627 | -0.86905   | -1.26192   | BGIOSGA023367 | XP_004965731.150S ribosomal protein L35, chloroplastic                                   |
| TCONS_00005760 | -0.530537 | 2.43278    | 1.28932    | BGIOSGA007873 | XP_024314853.1 probable splicing factor 3A subunit 1                                     |
| TCONS_00037042 | -0.530028 | -2.11998   | -1.38814   | BGIOSGA036337 | XP_004952076.1 phosphoglucan, water dikinase, chloroplastic                              |
| TCONS_00011946 | -0.529792 | 0.429897   | -0.151674  | BGIOSGA009117 | XP_006651233.1 mitogen-activated protein kinase kinase kinase 1-like                     |
| TCONS_00011470 | -0.529713 | -0.664983  | -0.865741  | BGIOSGA033156 | XP_015690751.1 endoribonuclease Dicer homolog 1                                          |
| TCONS_00031606 | -0.529681 | -0.679413  | -1.55968   | BGIOSGA031457 | XP_006662585.1 U-box domain-containing protein 33-like isoform X1                        |
| TCONS_00017255 | -0.529632 | -0.602602  | -1.05193   | BGIOSGA019300 | XP_015693384.1 protein CHUP1, chloroplastic                                              |
| TCONS_00010337 | -0.529629 | -0.151657  | -1.43448   | BGIOSGA035954 | XP_006650207.1 diacylglycerol kinase 1 isoform X1                                        |
| TCONS_00028942 | -0.529255 | -0.392298  | -0.420935  | BGIOSGA025290 | XP_006660596.1 chromatin remodeling protein EBS                                          |
| TCONS_00035436 | -0.529196 | -1.05706   | -1.07018   | BGIOSGA037885 | XP_015698707.1 PREDICTED: uncharacterized protein LOC102718415                           |
| TCONS_00022418 | -0.529104 | -0.378165  | 0.457322   | BGIOSGA019930 | XP_002438562.1 tRNA A64-2'-O-ribosylphosphate transferase                                |
| TCONS_00025254 | -0.528314 | -1.25116   | 1.67629    | BGIOSGA008904 | XP_012699403.1 cysteine-rich receptor-like protein kinase 6                              |
| TCONS_00019792 | -0.528264 | -0.0204103 | 1.83701    | BGIOSGA004181 | XP_006654783.1 protein DEHYDRATION-INDUCED 19                                            |
| TCONS_00008835 | -0.527556 | 0.0787435  | -0.0735404 | BGIOSGA022553 | XP_015689371.1 SNW/SKI-interacting protein                                               |
| TCONS_00004742 | -0.5275   | -0.574337  | -0.624073  | BGIOSGA021811 | XP_006646487.1 transcription factor DIVARICATA-like                                      |
| TCONS_00023519 | -0.526938 | 0.18575    | -0.39011   | BGIOSGA025554 | XP_015698427.1 xylulose kinase isoform X1                                                |
| TCONS_00004089 | -0.526914 | -0.994088  | -1.21698   | BGIOSGA020656 | XP_006644455.1 cytosolic isocitrate dehydrogenase [NADP]-like                            |
| TCONS_00003719 | -0.526855 | -0.351374  | -0.298125  | BGIOSGA007885 | XP_006645969.2 putative callose synthase 6                                               |
| TCONS_00008615 | -0.526594 | -0.764879  | 1.16439    | BGIOSGA023574 | XP_015688374.1 protein NRT1/ PTR FAMILY 7.2-like                                         |
| TCONS_00009683 | -0.526451 | 0.878364   | -0.659447  | BGIOSGA026406 | XP_006649740.1 PREDICTED: uncharacterized protein LOC102706732                           |
| TCONS_00015935 | -0.526399 | -0.383694  | 0.0738214  | BGIOSGA024269 | XP_015691464.1 glycolipid transfer protein 2                                             |
| TCONS_00008827 | -0.526302 | -0.180283  | 0.672688   | BGIOSGA000497 | XP_002452533.2 probable pectin methyltransferase QUA2                                    |
| TCONS_00003467 | -0.526225 | 0.491497   | 0.0273972  | BGIOSGA001754 | XP_022682343.1 F-box protein SKIP23-like                                                 |
| TCONS_00020095 | -0.526183 | -2.64912   | -1.47357   | BGIOSGA003221 | XP_010228098.1 wall-associated receptor kinase 3 isoform X1                              |
| TCONS_00032682 | -0.526112 | -0.691008  | -2.8133    | BGIOSGA019157 | XP_015697075.1 transcription factor UNE10-like                                           |
| TCONS_00020671 | -0.525924 | -0.182495  | 0.28954    | BGIOSGA011793 | XP_015694103.1 PREDICTED: uncharacterized protein LOC102712736                           |
| TCONS_00020648 | -0.525688 | -2.55946   | -0.717961  | BGIOSGA013183 | XP_006656052.1 auxin-responsive protein IAA21                                            |
| TCONS_00006033 | -0.525512 | -0.862803  | -1.09822   | BGIOSGA008185 | XP_006665033.1 high mobility group B protein 15-like                                     |
| TCONS_00019321 | -0.525208 | 0.0762991  | -0.648568  | BGIOSGA027060 | XP_006654423.1 probable receptor-like protein kinase At1g11050                           |
| TCONS_00017576 | -0.525159 | -2.25385   | -0.471359  | BGIOSGA035755 | XP_004962423.1 protein NRT1/ PTR FAMILY 2.7                                              |
| TCONS_00007010 | -0.525111 | 0.0633371  | 0.398903   | BGIOSGA034406 | XP_002450408.1 protein TPLATE                                                            |
| TCONS_00033081 | -0.524998 | -1.38334   | -1.85027   | BGIOSGA022473 | XP_015697509.1 myb-related protein 308                                                   |
| TCONS_00000519 | -0.524948 | -0.497213  | -0.841855  | BGIOSGA036199 | XP_006645691.1 auxin response factor 1                                                   |
| TCONS_00022433 | -0.524524 | -2.44703   | -1.26481   | BGIOSGA002213 | XP_006656170.1 pollen-specific protein SF21-like isoform X1                              |
| TCONS_00015109 | -0.524463 | -0.632555  | 0.313878   | BGIOSGA017289 | XP_006652952.1 protein PELOTA 1                                                          |
| TCONS_00030686 | -0.524454 | -0.166062  | -0.157548  | BGIOSGA013958 | XP_006660835.1 ankyrin repeat domain-containing protein 2A-like                          |
| TCONS_00022023 | -0.524447 | -0.0495945 | -1.24503   | BGIOSGA013611 | XP_014753035.1 uncharacterized protein LOC100837969                                      |
| TCONS_00008596 | -0.523831 | -1.78557   | -1.33891   | BGIOSGA029303 | XP_010504143.1 histone H4                                                                |
| TCONS_00002568 | -0.523702 | 0.0987798  | 0.218219   | BGIOSGA002538 | XP_003565105.2 ribosomal RNA-processing protein 12                                       |
| TCONS_00032797 | -0.523429 | -0.143593  | 0.0263472  | BGIOSGA029174 | XP_015698258.1 PREDICTED: uncharacterized protein LOC102701320, partial                  |
| TCONS_00037449 | -0.523349 | -1.40814   | -1.59134   | BGIOSGA029539 | XP_006664158.2 PREDICTED: uncharacterized protein LOC102712487                           |
| TCONS_00028199 | -0.523334 | -1.77415   | 1.77782    | BGIOSGA026829 | XP_006659512.1 basic blue protein-like                                                   |
| TCONS_00023874 | -0.522803 | -2.42983   | -1.8193    | BGIOSGA025905 | XP_015695418.1 BTB/POZ domain-containing protein At3g22104                               |
| TCONS_00034405 | -0.522785 | 0.281241   | -0.328836  | BGIOSGA034405 | XP_006662774.1 DEXH-box ATP-dependent RNA helicase DEXH10                                |
| TCONS_00017683 | -0.522637 | -1.69522   | -0.937556  | BGIOSGA030088 | XP_006654325.1 RNA-binding protein BRN1-like                                             |
| TCONS_00033358 | -0.522634 | -0.309503  | -1.77597   | BGIOSGA023337 | XP_010237180.1 premmaspirodine oxygenase isoform X2                                      |
| TCONS_00024407 | -0.522496 | 0.0229882  | -0.469506  | BGIOSGA024675 | XP_006658174.1 probable AMP deaminase                                                    |
| TCONS_00019284 | -0.522378 | -2.13523   | -1.70053   | BGIOSGA025304 | XP_006654395.1 1-deoxy-D-xylulose-5-phosphate synthase 1, chloroplastic isoform X4       |
| TCONS_00036720 | -0.52214  | 0.535893   | -0.594334  | BGIOSGA015126 | XP_015698223.1 transcription factor E2FA-like                                            |
| TCONS_00021486 | -0.521919 | -0.908353  | -0.526474  | BGIOSGA022063 | XP_006655719.1 PREDICTED: uncharacterized protein LOC102706663                           |
| TCONS_00021798 | -0.521635 | -0.444122  | -0.161174  | BGIOSGA009147 | XP_006655885.1 polyadenylate-binding protein-interacting protein 7                       |
| TCONS_00009516 | -0.521493 | -1.18808   | -0.180895  | BGIOSGA026517 | XP_021302227.1 putative F-box/FBD/LRR-repeat protein At4g03220 isoform X1                |
| TCONS_00011861 | -0.521314 | 0.419378   | 0.0854493  | BGIOSGA003655 | XP_015689828.1 type IV inositol polyphosphate 5-phosphatase 9                            |

## transcriptome

|                |           |            |            |               |                                                                                          |
|----------------|-----------|------------|------------|---------------|------------------------------------------------------------------------------------------|
| TCONS_00027022 | -0.521208 | 0.553208   | 0.938075   | BGIOSGA016314 | XP_006659640.2 glycine--tRNA ligase, mitochondrial 1-like                                |
| TCONS_00035509 | -0.520977 | 0.807969   | -0.102613  | BGIOSGA001894 | XP_015699121.1 calmodulin-binding protein 25-like                                        |
| TCONS_00005895 | -0.52089  | -0.875114  | -0.467662  | BGIOSGA006624 | XP_021313205.1 tyrosine aminotransferase isoform X1                                      |
| TCONS_00034357 | -0.520869 | -1.22754   | -0.398165  | BGIOSGA034446 | XP_006662758.1 autophagy-related protein 13b-like                                        |
| TCONS_00022502 | -0.520866 | -0.364361  | -1.171     | BGIOSGA020951 | XP_006656197.2 two-on-two hemoglobin-3                                                   |
| TCONS_00009563 | -0.520753 | -0.691141  | -0.259825  | BGIOSGA006849 | XP_006651167.1 protein RIK isoform X1                                                    |
| TCONS_00015021 | -0.519957 | -0.903901  | -0.218626  | BGIOSGA027555 | XP_006652883.1 double-strand break repair protein MRE11 isoform X1                       |
| TCONS_00021909 | -0.519668 | -0.568905  | -1.54483   | BGIOSGA011458 | XP_006655938.1 aquaporin NIP2-2                                                          |
| TCONS_00021414 | -0.519663 | -1.33277   | -0.323214  | BGIOSGA008813 | XP_015693717.1 PREDICTED: uncharacterized protein LOC102701461                           |
| TCONS_00015941 | -0.51955  | -0.57716   | 0.688597   | BGIOSGA015042 | XP_006653432.1 nuclear speckle splicing regulatory protein 1-like                        |
| TCONS_00033476 | -0.519515 | 0.394401   | 1.08102    | BGIOSGA011671 | XP_021314058.1 plasma membrane ATPase isoform X2                                         |
| TCONS_00033180 | -0.519503 | 0.03046    | -0.711705  | BGIOSGA034641 | XP_006663720.1 PREDICTED: uncharacterized protein LOC102720754                           |
| TCONS_00002262 | -0.519294 | -1.44564   | 0.641045   | BGIOSGA000524 | XP_015690519.1 protein NRT1/ PTR FAMILY 5.10-like                                        |
| TCONS_00010442 | -0.519055 | -0.0690059 | 0.60634    | BGIOSGA013035 | XP_002466864.1 FRIGIDA-like protein 3                                                    |
| TCONS_00017764 | -0.519009 | -2.93748   | 0.593958   | BGIOSGA008904 | XP_004962160.1 probable serine/threonine-protein kinase PBL7                             |
| TCONS_00010615 | -0.518808 | -0.665235  | 0.0654383  | BGIOSGA013238 | XP_006651650.1 protein FAR1-RELATED SEQUENCE 5-like isoform X2                           |
| TCONS_00018311 | -0.518604 | -0.343288  | -0.240335  | BGIOSGA031012 | XP_015693290.1 splicing factor U2af small subunit B                                      |
| TCONS_00030456 | -0.518045 | 0.344194   | 0.224907   | BGIOSGA011386 | XP_006660916.1 H/ACA ribonucleoprotein complex subunit 1                                 |
| TCONS_00034899 | -0.517636 | -0.51813   | 0.391473   | BGIOSGA016888 | XP_006663465.2 putative squamosa promoter-binding-like protein 19                        |
| TCONS_00005002 | -0.517564 | -0.405011  | -0.0246984 | BGIOSGA000218 | XP_006645263.1 ubiquitin-conjugating enzyme E2 27                                        |
| TCONS_00036683 | -0.517296 | 0.403867   | -0.162045  | BGIOSGA034487 | XP_006662734.1 60S ribosomal protein L26-1-like                                          |
| TCONS_00011865 | -0.517234 | -0.296246  | 0.695322   | BGIOSGA027891 | XP_022685589.1 zinc finger protein 4                                                     |
| TCONS_00025777 | -0.516567 | -0.487788  | -0.610376  | BGIOSGA020180 | XP_006659019.1 tubby-like F-box protein 12 isoform X2                                    |
| TCONS_00027740 | -0.516476 | 0.0653639  | -0.376965  | BGIOSGA027261 | XP_006660015.1 pentatricopeptide repeat-containing protein At4g19440, chloroplastic-like |
| TCONS_00027151 | -0.516346 | 0.444597   | 0.39767    | BGIOSGA007449 | XP_006660387.1 serine carboxypeptidase-like 51                                           |
| TCONS_00021858 | -0.516339 | -0.166135  | 0.315714   | BGIOSGA021661 | XP_015693794.1 mediator of RNA polymerase II transcription subunit 6                     |
| TCONS_00000417 | -0.516247 | -1.07137   | -0.669876  | BGIOSGA026217 | XP_010230614.1 uncharacterized protein LOC100833563                                      |
| TCONS_00030191 | -0.516162 | 0.287359   | -0.792787  | BGIOSGA029614 | NP_001131978.1 Purine permease 3                                                         |
| TCONS_00026732 | -0.516119 | 0.588085   | -0.886614  | BGIOSGA030846 | XP_003574588.1 probable GTP diphosphokinase RSH2, chloroplastic                          |
| TCONS_00018613 | -0.516059 | 0.203669   | 0.71835    | BGIOSGA018821 | XP_006654036.1 DNA repair helicase XPD                                                   |
| TCONS_00018860 | -0.515909 | 0.562925   | -0.222374  | BGIOSGA036323 | XP_015698945.1 ABC transporter G family member 12-like isoform X1                        |
| TCONS_00004448 | -0.515487 | 0.538044   | 0.8222     | BGIOSGA020174 | XP_015691196.1 mitochondrial import inner membrane translocase subunit TIM50-like        |
| TCONS_00032650 | -0.515417 | -0.544888  | -0.0410155 | BGIOSGA021847 | XP_015697388.1 tetratricopeptide repeat protein SKI3                                     |
| TCONS_00002063 | -0.515344 | 1.67537    | 0.655832   | BGIOSGA013816 | XP_006644907.1 KH domain-containing protein SPIN1-like                                   |
| TCONS_00033470 | -0.515274 | -1.64665   | 0.298107   | BGIOSGA014614 | XP_004979270.1 ELMO domain-containing protein A isoform X1                               |
| TCONS_00032860 | -0.514979 | -0.55969   | -1.3708    | BGIOSGA034679 | XP_006662672.1 non-specific lipid-transfer protein 1                                     |
| TCONS_00000715 | -0.514746 | -0.127258  | 0.274643   | BGIOSGA031532 | XP_006644095.1 glycogen synthase kinase-3 homolog Msk-1-like                             |
| TCONS_00008553 | -0.514602 | -0.895314  | 0.714178   | BGIOSGA014552 | XP_006647661.1 ganglioside-induced differentiation-associated protein 2-like             |
| TCONS_00029550 | -0.51436  | -0.413221  | -0.268557  | BGIOSGA011673 | XP_014757943.1 uncharacterized protein LOC100832504                                      |
| TCONS_00018787 | -0.514123 | 0.319168   | -1.38016   | BGIOSGA006676 | XP_003564938.1 PRA1 family protein F3                                                    |
| TCONS_00009198 | -0.513945 | -1.46345   | -1.5303    | BGIOSGA016953 | XP_006649273.1 dihydroadipicinate reductase-like protein CRR1, chloroplastic isoform X1  |
| TCONS_00013994 | -0.513934 | 0.738449   | 0.355336   | BGIOSGA016140 | XP_006652178.1 importin beta-like SAD2                                                   |
| TCONS_00004406 | -0.513844 | -0.41646   | -0.0989256 | BGIOSGA010255 | XP_015688108.1 transcription factor VOZ1                                                 |
| TCONS_00004411 | -0.5138   | -0.558321  | -0.327491  | BGIOSGA003708 | XP_004969987.1 uncharacterized protein At4g28440                                         |
| TCONS_00020562 | -0.513701 | 1.4452     | -0.0999049 | BGIOSGA022733 | XP_015693553.1 PREDICTED: uncharacterized protein LOC102717260                           |
| TCONS_00003493 | -0.513244 | -0.488522  | -1.76054   | BGIOSGA021201 | XP_006645860.1 LYR motif-containing protein At3g19508                                    |
| TCONS_00026819 | -0.513104 | -0.698353  | 0.451643   | BGIOSGA028876 | XP_006659517.1 PREDICTED: uncharacterized protein LOC102716893                           |
| TCONS_00013601 | -0.512997 | 0.441118   | -0.14739   | BGIOSGA015754 | XP_006652071.2 zinc finger CCCH domain-containing protein 24                             |
| TCONS_00026285 | -0.512484 | -1.52464   | -1.3869    | BGIOSGA028368 | XP_006659255.2 reticulon-like protein B21 isoform X2                                     |
| TCONS_00016016 | -0.512462 | 0.500491   | 0.750283   | BGIOSGA006189 | XP_006652370.1 NAP1-related protein 1                                                    |
| TCONS_00036327 | -0.512383 | 0.488263   | -0.239795  | BGIOSGA012069 | XP_006664154.1 calcium-transporting ATPase 1, plasma membrane-type                       |
| TCONS_00006381 | -0.512301 | -0.67687   | -0.27632   | BGIOSGA027714 | XP_006647456.2 actin-related protein 3 isoform X2                                        |
| TCONS_00028734 | -0.512203 | 0.137975   | -0.902167  | BGIOSGA028529 | XP_015696602.1 protein SAR DEFICIENT 1-like                                              |

## transcriptome

|                |           |           |             |               |                                                                                         |
|----------------|-----------|-----------|-------------|---------------|-----------------------------------------------------------------------------------------|
| TCONS_00010237 | -0.512167 | 0.590442  | -0.709611   | BGIOSGA010905 | XP_006651470.1 probable protein phosphatase 2C 12                                       |
| TCONS_00005426 | -0.511192 | -0.272124 | 0.0492175   | BGIOSGA000186 | XP_006646881.1 pathogenesis-related homeodomain protein                                 |
| TCONS_00031409 | -0.511906 | 1.41803   | 0.0786924   | BGIOSGA033223 | NP_001143149.1 hypothetical protein                                                     |
| TCONS_00013637 | -0.511902 | 0.234943  | -0.189327   | BGIOSGA015793 | XP_015691355.1 tRNA-dihydrouridine(47) synthase [NAD(P)(+)]-like                        |
| TCONS_00011444 | -0.511375 | 0.117826  | -0.463641   | BGIOSGA023363 | XP_006649262.2 AAA-ATPase At2g46620                                                     |
| TCONS_00031076 | -0.511362 | -0.198203 | 0.0201282   | BGIOSGA006869 | XP_002467261.1 putative serine/threonine-protein phosphatase PP2A-4 catalytic subunit   |
| TCONS_00033030 | -0.511124 | -0.218294 | -0.158296   | BGIOSGA004862 | XP_006662759.1 actin-7                                                                  |
| TCONS_00004155 | -0.511231 | -0.818392 | 0.610004    | BGIOSGA020354 | XP_014660809.2 mediator of RNA polymerase II transcription subunit 15-like              |
| TCONS_00019935 | -0.510955 | -0.684516 | 0.844255    | BGIOSGA022119 | XP_015694340.1 protein-lysine methyltransferase METTL21D                                |
| TCONS_00019087 | -0.510861 | -0.719322 | -0.464911   | BGIOSGA018107 | XP_006654272.1 TOM1-like protein 2                                                      |
| TCONS_00007783 | -0.510763 | -0.580449 | -0.801606   | BGIOSGA006700 | XP_015688553.1 probable tocopherol cyclase, chloroplastic                               |
| TCONS_00006270 | -0.510434 | -1.38509  | -0.294184   | BGIOSGA006255 | XP_006647377.1 RING-H2 finger protein ATL58-like                                        |
| TCONS_00004321 | -0.510434 | -1.06316  | -0.957149   | BGIOSGA021834 | XP_004969818.1 uncharacterized protein LOC101753132                                     |
| TCONS_00005807 | -0.510388 | -1.36762  | -1.43408    | BGIOSGA007928 | XP_006647138.2 PREDICTED: uncharacterized protein LOC102716377                          |
| TCONS_00025343 | -0.510018 | -0.893585 | -0.73438    | BGIOSGA033172 | XP_006657835.1 myosin-1 isoform X2                                                      |
| TCONS_00006396 | -0.50998  | -1.81619  | -0.445796   | BGIOSGA008552 | XP_015689345.1 telomere length regulation protein TEL2 homolog                          |
| TCONS_00017756 | -0.509826 | 0.108148  | 0.00121974  | BGIOSGA011758 | XP_006654361.1 DUF21 domain-containing protein At4g14240                                |
| TCONS_00007527 | -0.509775 | -0.165653 | -0.469177   | BGIOSGA031963 | XP_006648417.1 TBCC domain-containing protein 1-like                                    |
| TCONS_00031596 | -0.509741 | -1.03775  | -0.66497    | BGIOSGA011613 | XP_006662032.1 PREDICTED: uncharacterized protein LOC102702041                          |
| TCONS_00022669 | -0.509482 | 0.235629  | -0.0420267  | BGIOSGA023944 | XP_006657196.1 vestitone reductase-like                                                 |
| TCONS_00020835 | -0.509249 | -1.75587  | -1.31249    | BGIOSGA012591 | XP_004965538.1 E3 ubiquitin-protein ligase Os06g0535400                                 |
| TCONS_00000883 | -0.509218 | -0.614969 | -0.223517   | BGIOSGA014781 | XP_012702637.160S ribosomal protein L23A                                                |
| TCONS_00023135 | -0.508867 | -0.140799 | -0.185608   | BGIOSGA013394 | XP_006657456.1 ethylene-insensitive protein 2-like                                      |
| TCONS_00000335 | -0.508739 | 0.488452  | 0.376712    | BGIOSGA002911 | XP_006643852.2 nuclear distribution protein nudF-like                                   |
| TCONS_00015144 | -0.508234 | 0.504693  | 1.13556     | BGIOSGA036952 | XP_006652987.1 F-box/kelch-repeat protein At5g15710                                     |
| TCONS_00020122 | -0.507577 | -1.71521  | -0.761714   | BGIOSGA012481 | XP_015693413.1 GDSL esterase/lipase APG-like                                            |
| TCONS_00011333 | -0.507571 | 0.526225  | -0.924981   | BGIOSGA013947 | XP_004981047.1 uncharacterized protein At4g15970                                        |
| TCONS_00011475 | -0.507112 | 0.618711  | 0.313204    | BGIOSGA031491 | XP_006649301.1 PREDICTED: uncharacterized protein LOC102721525                          |
| TCONS_00016433 | -0.507045 | 1.6681    | 0.503704    | BGIOSGA029244 | XP_015692316.1 amino acid transporter ANTL2-like                                        |
| TCONS_00018250 | -0.506762 | 0.839299  | 0.104463    | BGIOSGA034439 | XP_006654741.1 histone-lysine N-methyltransferase, H3 lysine-9 specific SUVH3-like      |
| TCONS_00027495 | -0.506567 | 0.320604  | 0.355486    | BGIOSGA022518 | XP_006659905.1 nucleolin 1                                                              |
| TCONS_00032185 | -0.506459 | -0.446761 | -0.764574   | BGIOSGA006965 | XP_006662343.1 probable mannan synthase 2                                               |
| TCONS_00007725 | -0.506454 | -0.740702 | -0.943467   | BGIOSGA028733 | XP_015688543.1 protein TSS                                                              |
| TCONS_00023128 | -0.506449 | 0.901998  | -1.41816    | BGIOSGA038447 | XP_006657453.1 peroxisomal (S)-2-hydroxy-acid oxidase GLO5                              |
| TCONS_00017424 | -0.506321 | 0.331897  | -0.0148325  | BGIOSGA018691 | XP_004955547.1 eukaryotic translation initiation factor 3 subunit I                     |
| TCONS_00003682 | -0.50614  | -1.81279  | -0.478457   | BGIOSGA001522 | XP_006645946.1 PREDICTED: uncharacterized protein LOC102705398                          |
| TCONS_00022993 | -0.506137 | -0.10412  | -0.345501   | BGIOSGA025025 | XP_006657403.2 nipped-B-like protein B                                                  |
| TCONS_00030698 | -0.505998 | -1.4421   | 0.148958    | BGIOSGA032518 | XP_003573733.2 uncharacterized protein LOC100841347                                     |
| TCONS_00016641 | -0.505831 | -1.22015  | -0.0619284  | #N/A          | #N/A                                                                                    |
| TCONS_00021205 | -0.505753 | -0.943466 | -0.00742874 | BGIOSGA023426 | XP_006657228.2 thioredoxin O, mitochondrial                                             |
| TCONS_00012580 | -0.505633 | -0.685025 | -0.594842   | BGIOSGA019930 | XP_015690849.1 vacuolar protein-sorting-associated protein 37 homolog 1-like isoform X2 |
| TCONS_00027881 | -0.505593 | -0.778906 | -1.49549    | #N/A          | #N/A                                                                                    |
| TCONS_00038397 | -0.505419 | -2.23925  | -0.974032   | BGIOSGA005995 | XP_002448198.2 heavy metal-associated isoprenylated plant protein 34                    |
| TCONS_00020598 | -0.505362 | -0.805637 | 0.837342    | BGIOSGA023829 | XP_015694480.1 probable mediator of RNA polymerase II transcription subunit 26b         |
| TCONS_00032770 | -0.505288 | 0.8296    | 0.187645    | BGIOSGA008174 | XP_006662634.1 inositol-tetrakisphosphate 1-kinase 5                                    |
| TCONS_00007378 | -0.505037 | -0.408564 | -0.53729    | BGIOSGA007099 | XP_015688460.1 translation factor GUF1 homolog, chloroplastic                           |
| TCONS_00014645 | -0.504772 | 0.109151  | -0.0928314  | BGIOSGA017355 | XP_006653617.1 WD repeat-containing protein 44-like                                     |
| TCONS_00021581 | -0.504741 | -0.247115 | -0.588539   | BGIOSGA028368 | XP_003557199.1 nudix hydrolase 19, chloroplastic                                        |
| TCONS_00005542 | -0.504361 | 0.165677  | -0.0379639  | BGIOSGA030433 | XP_009414815.1 60S ribosomal protein L27a-3-like                                        |
| TCONS_00011016 | -0.504322 | -1.14644  | 0.211373    | BGIOSGA001368 | XP_010229377.1 transcription factor HHO5                                                |
| TCONS_00013204 | -0.504317 | -0.38983  | 0.182768    | BGIOSGA009783 | XP_006650612.1 PREDICTED: uncharacterized protein LOC102702080                          |
| TCONS_00003333 | -0.504282 | -4.26186  | -1.271      | BGIOSGA001883 | XP_002457676.1 lamin-like protein                                                       |
| TCONS_00028087 | -0.504106 | #N/A      | -2.36788    | BGIOSGA015763 | XP_006664931.1 glyoxylate/hydroxypyruvate reductase HPR3-like                           |
| TCONS_00022859 | -0.504072 | -0.461065 | -1.50748    | BGIOSGA002073 | XP_006657304.1 probable cation transporter HKT9                                         |
| TCONS_00012628 | -0.504061 | 0.278425  | 0.312557    | BGIOSGA010345 | XP_015691313.1 lysine-tRNA ligase                                                       |
| TCONS_00029811 | -0.503468 | -1.99469  | -0.494937   | BGIOSGA030004 | XP_004956563.1 glutathione S-transferase T3                                             |

transcriptome

|                 |           |            |            |               |                                                                                  |
|-----------------|-----------|------------|------------|---------------|----------------------------------------------------------------------------------|
| TCONS_00010939  | -0.503215 | -1.67825   | -0.858626  | BGIOSGA027472 | XP_006650520.1PREDICTED: uncharacterized protein LOC102721532                    |
| TCONS_00008011  | -0.503095 | 1.03037    | 0.378609   | BGIOSGA032485 | XP_015688595.1 phenolic glucoside malonyltransferase 1-like                      |
| TCONS_00019698  | -0.502959 | -0.401456  | 0.0660943  | BGIOSGA021436 | XP_006655530.1 delta-1-pyrroline-5-carboxylate dehydrogenase 12A1, mitochondrial |
| TCONS_00031171  | -0.502895 | 0.174814   | 0.210481   | BGIOSGA035727 | XP_015697000.1 E3 ubiquitin-protein ligase RBBP6-like                            |
| TCONS_00009064  | -0.502676 | -1.58065   | -0.944353  | BGIOSGA002819 | XP_006648137.1 calmodulin-binding receptor-like cytoplasmic kinase 2             |
| TCONS_00030557  | -0.5024   | -0.311068  | -0.303914  | BGIOSGA029101 | XP_003559281.1 uncharacterized protein LOC100826907                              |
| TCONS_00004630  | -0.502226 | -0.480296  | 0.11444    | BGIOSGA000587 | XP_006644915.1 probable inactive serine/threonine-protein kinase scy1            |
| TCONS_00024362  | -0.502139 | -1.80372   | 0.179853   | BGIOSGA028853 | XP_015695406.1 probable galacturonosyltransferase 7 isoform X1                   |
| TCONS_00013137  | -0.501928 | -0.328172  | -0.564051  | BGIOSGA014680 | XP_006651794.1 GEM-like protein 1                                                |
| TCONS_00005550  | -0.50165  | -0.568012  | -0.629752  | BGIOSGA010489 | XP_003563375.1 protein transport protein Sec61 subunit gamma                     |
| TCONS_00023376  | -0.501567 | -0.394932  | -1.97964   | BGIOSGA013269 | XP_006657574.1PREDICTED: uncharacterized protein LOC102720060                    |
| TCONS_00009082  | -0.501567 | -0.9355    | -0.979645  | BGIOSGA021467 | XP_006648162.1 signal peptidase complex catalytic subunit SEC11C-like isoform X1 |
| TCONS_00036507  | -0.501435 | -0.731426  | -0.129347  | BGIOSGA013366 | XP_006664792.2 beta-glucuronosyltransferase GlcAT14A                             |
| TCONS_00033842  | -0.501399 | -0.510618  | -1.16271   | BGIOSGA037430 | XP_006663048.1 DNA repair protein RAD51 homolog A                                |
| TCONS_00019002  | -0.501352 | -0.189993  | -0.706608  | BGIOSGA021293 | XP_015693103.1 proline-, glutamic acid- and leucine-rich protein 1-like          |
| TCONS_00001369  | -0.501341 | 0.529184   | 0.637319   | BGIOSGA003999 | XP_003566889.1 centromere protein C isoform X3                                   |
| TCONS_00000387  | -0.501115 | -1.54302   | -0.820316  | BGIOSGA002963 | XP_006645616.1 uncharacterized WD repeat-containing protein air2800              |
| TCONS_00020096  | -0.500578 | 0.125778   | 0.222279   | BGIOSGA022276 | XP_006656624.2 protein arginine N-methyltransferase PRMT10                       |
| TCONS_00012577  | -0.500431 | 1.31962    | -0.61342   | BGIOSGA035894 | XP_003562350.1 protein DETOXIFICATION 40                                         |
| TCONS_00014471  | -0.500167 | 0.288022   | 0.154675   | BGIOSGA026762 | XP_006652430.1 26S proteasome non-ATPase regulatory subunit 6                    |
| TCONS_00034679  | -0.500007 | 0.17259    | -0.0559988 | #N/A          | #N/A                                                                             |
| TCONS_00022424  | -0.499909 | -0.0919145 | 0.436571   | BGIOSGA021041 | XP_006656163.1 nuclear poly(A) polymerase 4 isoform X2                           |
| TCONS_00022773  | -0.499892 | -0.179939  | -0.474565  | BGIOSGA009399 | XP_006657250.1 solanesyl-diphosphate synthase 1, mitochondrial                   |
| TCONS_00026297  | -0.499884 | 0.330986   | -1.02972   | #N/A          | #N/A                                                                             |
| TCONS_00002292  | -0.49988  | -0.595875  | -0.264432  | BGIOSGA020627 | XP_006646536.1 probable receptor-like protein kinase At1g11050                   |
| TCONS_00008268  | -0.499787 | 0.904419   | 0.872926   | BGIOSGA014918 | XP_004952921.1 heavy metal-associated isoprenylated plant protein 47             |
| TCONS_00028189  | -0.499625 | -0.30478   | -0.819689  | BGIOSGA026796 | XP_006659504.1 signal recognition particle receptor subunit alpha                |
| TCONS_00024969  | -0.499474 | -1.99043   | -3.17103   | BGIOSGA031554 | XP_006664959.1 protein CDI-like                                                  |
| TCONS_00005797  | -0.499395 | 0.509364   | -2.98515   | BGIOSGA007912 | XP_004951276.1 uncharacterized protein LOC101764619                              |
| TCONS_00008339  | -0.49919  | -0.135652  | 0.377125   | BGIOSGA006086 | XP_004953030.1 eukaryotic translation initiation factor 2A                       |
| TCONS_000033195 | -0.499108 | -0.804071  | -0.74436   | BGIOSGA021845 | XP_015697771.1 putative disease resistance RPP13-like protein 2                  |
| TCONS_00010377  | -0.499048 | 0.689515   | -0.986031  | #N/A          | #N/A                                                                             |
| TCONS_00036984  | -0.498971 | -1.94983   | -1.72251   | BGIOSGA007558 | XP_006663954.1 ribulose biphosphate carboxylase small chain, chloroplastic-like  |
| TCONS_00035046  | -0.498935 | -2.10858   | -1.02696   | BGIOSGA033808 | XP_006663526.2 putative wall-associated receptor kinase-like 16                  |
| TCONS_00021014  | -0.498504 | 0.601389   | -0.180046  | BGIOSGA030362 | XP_006656231.1 protein transport protein SFT2                                    |
| TCONS_00004225  | -0.498099 | -1.24434   | -0.805211  | BGIOSGA020926 | XP_006644542.1 peptidyl-tRNA hydrolase, mitochondrial                            |
| TCONS_00012896  | -0.498002 | -0.0773015 | -1.4037    | BGIOSGA010087 | XP_006650392.1 deoxyuridine 5'-triphosphate nucleotidohydrolase                  |
| TCONS_00015194  | -0.497908 | -1.37072   | 0.10402    | BGIOSGA017376 | XP_015692401.1 tRNA-specific adenosine deaminase 1 isoform X1                    |
| TCONS_00007072  | -0.497722 | -0.354987  | -0.223317  | BGIOSGA003070 | XP_015689626.1 diphthine--ammonia ligase                                         |
| TCONS_00028485  | -0.497682 | -0.592115  | 0.523096   | BGIOSGA005326 | XP_006659713.1 ABC transporter F family member 1 isoform X1                      |
| TCONS_00010911  | -0.497638 | 0.525745   | -0.393618  | #N/A          | XP_015690060.1 serine/threonine-protein kinase SMG1-like                         |
| TCONS_00016871  | -0.497567 | -1.38678   | 0.272474   | BGIOSGA003668 | XP_004960078.1 transcription factor SRM1                                         |
| TCONS_00026734  | -0.497236 | 0.153264   | -0.962937  | BGIOSGA021674 | XP_006659475.1 12-oxophytodienoate reductase 7                                   |
| TCONS_00010576  | -0.496977 | -1.97153   | -0.211051  | BGIOSGA031257 | XP_006650328.1 organic cation/carnitine transporter 7-like                       |
| TCONS_00009401  | -0.49656  | -0.294471  | -0.726089  | BGIOSGA035533 | XP_006649477.1 F-box/kelch-repeat protein At1g74510-like                         |
| TCONS_00027149  | -0.496536 | 0.127821   | 0.109617   | BGIOSGA031309 | XP_006659702.1 protein HESO1-like                                                |
| TCONS_00020218  | -0.496513 | -1.53468   | -0.529438  | BGIOSGA022405 | XP_015694301.1PREDICTED: uncharacterized protein LOC102714471                    |
| TCONS_00001717  | -0.496399 | -3.22749   | -0.855377  | BGIOSGA026004 | XP_015696661.1 chlorophyll a-b binding protein of LHCII type 1-like isoform X2   |
| TCONS_00028411  | -0.496098 | 0.300463   | -0.158249  | BGIOSGA026552 | XP_015695998.1PREDICTED: uncharacterized protein LOC102719038                    |
| TCONS_00002437  | -0.496071 | -0.389182  | 0.289228   | BGIOSGA025045 | XP_006645249.1 CBS domain-containing protein CBSCBSPB1-like                      |
| TCONS_00002083  | -0.49597  | -2.40177   | 0.176138   | BGIOSGA034486 | XP_006647656.1 cytochrome P450 86A2-like                                         |
| TCONS_00010263  | -0.495389 | 0.0569312  | -1.12078   | #N/A          | #N/A                                                                             |
| TCONS_00029264  | -0.495051 | 0.813481   | -0.238196  | BGIOSGA002301 | XP_004957179.1 transcription factor bHLH130 isoform X2                           |

transcriptome

|                |           |            |            |               |                                                                                                     |
|----------------|-----------|------------|------------|---------------|-----------------------------------------------------------------------------------------------------|
| TCONS_00004873 | -0.494922 | -1.81813   | -2.99642   | BGIOSGA000351 | XP_015695030.1 putative exosome complex component rrp40                                             |
| TCONS_00022748 | -0.494876 | 0.633019   | 0.642166   | BGIOSGA000676 | XP_006657236.1 conserved oligomeric Golgi complex subunit 7                                         |
| TCONS_00027114 | -0.494705 | -1.40337   | -1.412     | BGIOSGA026516 | XP_015695745.1 PREDICTED: uncharacterized protein LOC107303368                                      |
| TCONS_00033643 | -0.494686 | -0.571586  | -0.298461  | BGIOSGA007007 | XP_015697693.1 probable protein S-acyltransferase 23                                                |
| TCONS_00011079 | -0.494519 | -0.0690934 | -1.02297   | BGIOSGA013679 | NP_001149840.1 deoxyribodipyrimidine photolyase                                                     |
| TCONS_00023852 | -0.494328 | -0.0244654 | 0.158078   | BGIOSGA001458 | XP_006658649.1 cysteine-rich receptor-like protein kinase 15 isoform X1                             |
| TCONS_00003947 | -0.49425  | 0.0554897  | 0.809256   | BGIOSGA027024 | NP_001144724.2 uncharacterized LOC100277766 precursor                                               |
| TCONS_00029654 | -0.494202 | #NA        | -0.413256  | BGIOSGA030175 | XP_006660441.1 probable 2-oxoglutarate-dependent dioxygenase At3g49630                              |
| TCONS_00013724 | -0.493807 | -0.704716  | 0.229427   | BGIOSGA024506 | XP_015691370.1 ethylene receptor 2                                                                  |
| TCONS_00006393 | -0.493601 | -0.560112  | -0.812939  | BGIOSGA024440 | XP_015689444.1 glucose-6-phosphate 1-dehydrogenase, cytoplasmic isoform-like                        |
| TCONS_00021756 | -0.493383 | -0.346052  | -0.112089  | BGIOSGA009196 | XP_006655862.1 PREDICTED: uncharacterized protein LOC102701454                                      |
| TCONS_00021839 | -0.493358 | -0.344564  | -0.366217  | BGIOSGA021679 | XP_015693500.1 alternative NAD(P)H-ubiquinone oxidoreductase C1, chloroplastic/mitochondrial        |
| TCONS_00002729 | -0.493172 | 1.05075    | 0.674705   | BGIOSGA002493 | XP_006645447.1 PREDICTED: uncharacterized protein LOC102722913 isoform X1                           |
| TCONS_00020693 | -0.493047 | -3.40546   | -2.0011    | BGIOSGA007133 | XP_006659038.2 alcohol dehydrogenase XP_004960274.1 anaphase-promoting complex subunit 7 isoform X1 |
| TCONS_00017138 | -0.492905 | -0.161891  | -0.120371  | BGIOSGA019184 | XP_015697107.1 chitinase 2-like                                                                     |
| TCONS_00031102 | -0.492804 | 1.45221    | 0.805647   | BGIOSGA032918 | XP_006647152.1 uridine kinase-like protein 3                                                        |
| TCONS_00033266 | -0.492462 | -1.06499   | -0.69246   | BGIOSGA029043 | #N/A                                                                                                |
| TCONS_00021499 | -0.492246 | -4.40648   | -2.0031    | #N/A          | #N/A                                                                                                |
| TCONS_00001078 | -0.492203 | -2.72627   | -1.49669   | BGIOSGA006986 | XP_006644296.1 ABC transporter B family member 4-like                                               |
| TCONS_00016734 | -0.492078 | -1.34779   | -0.833592  | BGIOSGA014229 | XP_006652915.1 ubiquitin carboxyl-terminal hydrolase 22                                             |
| TCONS_00011573 | -0.491997 | -3.40679   | -1.41876   | BGIOSGA002203 | XP_002465848.1 RING-H2 finger protein ATL1                                                          |
| TCONS_00015962 | -0.491997 | -0.79208   | -1.35986   | BGIOSGA015020 | XP_015692165.1 putative 12-oxophytodienoate reductase 11 isoform X2                                 |
| TCONS_00027147 | -0.491909 | 0.43682    | 0.544038   | BGIOSGA029191 | XP_006659699.1 dihydroxy-acid dehydratase, chloroplastic                                            |
| TCONS_00027544 | -0.491741 | 0.708365   | 0.16557    | BGIOSGA028177 | XP_003573527.1 equilibrative nucleotide transporter 1                                               |
| TCONS_00024280 | -0.491274 | -0.435681  | 0.625804   | BGIOSGA026324 | XP_003563386.1 nucleolar protein 56                                                                 |
| TCONS_00030479 | -0.491216 | #NA        | -1.63054   | BGIOSGA031202 | XP_006660929.1 auxin-responsive protein SAUR36-like                                                 |
| TCONS_00025346 | -0.491196 | -0.0486486 | 1.07749    | BGIOSGA024084 | XP_006657841.1 probable ADP-ribosylation factor GTPase-activating protein AGD5 isoform X2           |
| TCONS_00001905 | -0.490866 | -0.215595  | 0.139369   | BGIOSGA040479 | XP_015690078.1 probable alpha-mannosidase I MNS4                                                    |
| TCONS_00006450 | -0.490849 | -0.0918535 | 0.274882   | BGIOSGA008618 | XP_002452442.1 nucleotide-sugar uncharacterized transporter 3                                       |
| TCONS_00023468 | -0.490732 | -1.52898   | -0.873715  | BGIOSGA026141 | XP_008651509.1 senescence-associated-like protein isoform X2                                        |
| TCONS_00008619 | -0.490692 | -1.78351   | 0.97137    | BGIOSGA005805 | XP_006647717.2 dnaJ homolog subfamily B member 14-like                                              |
| TCONS_00019307 | -0.490289 | -0.553566  | -1.12524   | BGIOSGA035427 | XP_006654413.2 uncharacterized hydrolase YugF                                                       |
| TCONS_00023023 | -0.490199 | -0.0871278 | -0.423221  | BGIOSGA014413 | XP_021307823.1 putative F-box/FBD/LRR-repeat protein At4g03220                                      |
| TCONS_00028615 | -0.489997 | -0.140426  | -0.310721  | BGIOSGA008103 | XP_006660457.1 protein C2-DOMAIN ABA-RELATED 11                                                     |
| TCONS_00031924 | -0.489871 | 0.290972   | 0.991007   | BGIOSGA016117 | XP_010918979.1 protein MICRORCHIDIA 2 isoform X2                                                    |
| TCONS_00012901 | -0.489583 | -1.33996   | -0.821881  | BGIOSGA004417 | XP_006650394.1 protein TRIGALACTOSYLDIACYLGLYCEROL 3, chloroplastic                                 |
| TCONS_00008721 | -0.489459 | #NA        | -1.39388   | BGIOSGA015772 | XP_006657780.1 isocitrate lyase                                                                     |
| TCONS_00035644 | -0.489383 | 0.290359   | -0.822573  | BGIOSGA020673 | XP_004977257.1 zinc finger protein STAR3                                                            |
| TCONS_00004350 | -0.489383 | 1.39727    | -0.0102002 | BGIOSGA026166 | XP_006644668.1 UDP-glycosyltransferase 88F4-like                                                    |
| TCONS_00005061 | -0.489317 | -1.08824   | -0.486802  | BGIOSGA000156 | XP_006645300.1 basic 7S globulin 2-like                                                             |
| TCONS_00025260 | -0.489226 | 0.321525   | 0.781968   | BGIOSGA016358 | XP_006657798.2 glucan endo-1,3-beta-glucosidase 12-like                                             |
| TCONS_00037657 | -0.488981 | -0.582322  | -0.125541  | BGIOSGA000187 | XP_006646880.1 DNA-binding protein BIN4                                                             |
| TCONS_00005142 | -0.488785 | 0.67663    | 1.23625    | BGIOSGA033440 | XP_006646715.1 putative box C/D snoRNA protein SPCC613.07                                           |
| TCONS_00034917 | -0.488744 | 0.589116   | 0.895111   | BGIOSGA035892 | XP_015697667.1 PREDICTED: uncharacterized protein LOC102719052, partial                             |
| TCONS_00031263 | -0.488623 | -0.80632   | -0.322202  | BGIOSGA033081 | XP_006661832.1 PREDICTED: uncharacterized protein LOC102712664 isoform X1                           |
| TCONS_00024163 | -0.48858  | -2.63507   | -1.64652   | BGIOSGA026200 | XP_004958426.1 uncharacterized protein LOC101776974                                                 |
| TCONS_00025386 | -0.48854  | -0.352246  | -0.349318  | BGIOSGA021135 | XP_006657876.1 CMP-sialic acid transporter 2 isoform X1                                             |
| TCONS_00034106 | -0.48843  | 0.0377245  | -1.05937   | BGIOSGA018401 | XP_015697857.1 probable pyridoxal 5'-phosphate synthase subunit PDX1.1                              |
| TCONS_00028321 | -0.487636 | 1.38028    | 0.0850259  | BGIOSGA026650 | XP_006660294.1 isoamylase 1, chloroplastic                                                          |
| TCONS_00007280 | -0.487422 | 0.471991   | 0.38035    | BGIOSGA015965 | XP_006648272.2 ribose-phosphate pyrophosphokinase 1, chloroplastic                                  |
| TCONS_00012249 | -0.487368 | -0.0632317 | 0.0181964  | BGIOSGA001682 | XP_006650065.1 putative ubiquitin-like-specific protease 1B                                         |
| TCONS_00018902 | -0.486969 | -1.9414    | -0.822905  | BGIOSGA028032 | XP_006645169.1 50S ribosomal protein L13                                                            |

transcriptome

|                |           |            |            |               |                                                                                                      |
|----------------|-----------|------------|------------|---------------|------------------------------------------------------------------------------------------------------|
| TCONS_00002750 | -0.486965 | 0.0608507  | 0.0317969  | BGIOSGA002467 | XP_021313139.1protein MAO HUZ1 4, chloroplastic                                                      |
| TCONS_00009901 | -0.486633 | 0.949041   | 0.442456   | BGIOSGA023677 | XP_004987034.1BRCT domain-containing protein At4g02110 isoform X2                                    |
| TCONS_00016174 | -0.486618 | -1.52132   | 0.338441   | BGIOSGA014802 | XP_004976091.1serine/arginine-rich splicing factor 6                                                 |
| TCONS_00022248 | -0.48596  | -1.50413   | -0.291058  | BGIOSGA008184 | XP_015694087.1 protein MICRORCHIDIA 6-like isoform X2                                                |
| TCONS_00028561 | -0.485802 | -0.920677  | -0.0301167 | BGIOSGA030210 | XP_015696597.1 ankyrin-1-like                                                                        |
| TCONS_00026892 | -0.485441 | 0.136354   | 0.0630786  | BGIOSGA008519 | XP_015696041.1 glycerophosphodiester phosphodiesterase GDPDL3                                        |
| TCONS_00036267 | -0.484905 | -1.18528   | -0.0615964 | BGIOSGA037628 | XP_015698334.1PREDICTED: uncharacterized protein LOC107305378, partial                               |
| TCONS_00015952 | -0.484849 | 0.127051   | 0.279142   | BGIOSGA015028 | XP_006653436.2 cleft lip and palate transmembrane protein 1 homolog                                  |
| TCONS_00003431 | -0.484587 | -0.0060928 | 0.0171337  | BGIOSGA012337 | XP_006645818.1 UDP-glucuronic acid decarboxylase 2                                                   |
| TCONS_00001705 | -0.484369 | -0.353357  | -1.20812   | BGIOSGA004338 | XP_006644625.1 alliin lyase-like                                                                     |
| TCONS_00012129 | -0.484192 | -0.635012  | -0.768098  | BGIOSGA010880 | XP_006649970.1PREDICTED: uncharacterized protein LOC102701065                                        |
| TCONS_00001531 | -0.484159 | 0.469285   | 0.211032   | BGIOSGA004078 | XP_023156542.1ribokinase isoform X1                                                                  |
| TCONS_00016877 | -0.484094 | -1.53901   | -0.671132  | BGIOSGA014434 | XP_015692380.1 HBS1-like protein                                                                     |
| TCONS_00015792 | -0.483869 | 0.89865    | 0.623598   | BGIOSGA015190 | XP_006652218.1 membrane-anchored ubiquitin-fold protein 4                                            |
| TCONS_00005019 | -0.483376 | 0.550885   | 1.35786    | BGIOSGA006075 | XP_010232773.1carbonyl reductase [NADPH] 1                                                           |
| TCONS_00013518 | -0.483327 | -1.68035   | -0.105727  | #N/A          | #N/A                                                                                                 |
| TCONS_00018617 | -0.483181 | -0.920371  | -0.950266  | BGIOSGA018817 | XP_015692754.1 pentatricopeptide repeat-containing protein At4g35850, mitochondrial                  |
| TCONS_00033572 | -0.483051 | -0.235208  | 1.61379    | BGIOSGA032512 | XP_006665027.1 alpha-mannosidase-like                                                                |
| TCONS_00013571 | -0.482827 | -0.250564  | 0.126347   | BGIOSGA009405 | XP_015691016.1PREDICTED: uncharacterized protein LOC102723037                                        |
| TCONS_00029611 | -0.482821 | -0.893422  | 0.112551   | BGIOSGA006444 | XP_015696597.1 ankyrin-1-like                                                                        |
| TCONS_00028647 | -0.482796 | -0.2976    | -0.596942  | BGIOSGA030399 | XP_003581007.1uncharacterized protein LOC100842516                                                   |
| TCONS_00020268 | -0.482579 | -0.121871  | -0.436199  | BGIOSGA023208 | XP_004954152.126S proteasome regulatory subunit 7A                                                   |
| TCONS_00015045 | -0.482566 | -2.10981   | -0.43623   | BGIOSGA035289 | XP_006652901.2 3-oxoacyl-[acyl-carrier-protein] synthase III, chloroplastic                          |
| TCONS_00029508 | -0.482367 | -1.41416   | -0.22295   | BGIOSGA023425 | XP_006660976.1 ALA-interacting subunit 1-like                                                        |
| TCONS_00034575 | -0.482007 | -0.838322  | -0.0289479 | BGIOSGA034241 | XP_015697607.1 glycerophosphodiester phosphodiesterase GDPD4                                         |
| TCONS_00036446 | -0.481996 | -0.56081   | -0.151397  | BGIOSGA014650 | XP_006664216.1 protein YABBY 6                                                                       |
| TCONS_00031468 | -0.481908 | 0.274659   | 0.478606   | BGIOSGA011701 | XP_004982595.1protein HLB1                                                                           |
| TCONS_00028400 | -0.481827 | 1.1221     | 0.618136   | BGIOSGA000219 | XP_003606833.1transmembrane protein, putative                                                        |
| TCONS_00028302 | -0.481729 | 0.191391   | 0.0138025  | BGIOSGA007545 | XP_006660282.2 serrate RNA effector molecule-like                                                    |
| TCONS_00007547 | -0.481671 | -1.12512   | 0.152638   | BGIOSGA007743 | XP_006647036.1 peptidyl-prolyl cis-trans isomerase FKBP16-1, chloroplastic                           |
| TCONS_00014424 | -0.481671 | -0.219368  | 0.042356   | BGIOSGA032170 | XP_006653510.1 ras-related protein Rab-2-B                                                           |
| TCONS_00030565 | -0.481603 | -1.11255   | -0.780843  | BGIOSGA022642 | XP_006661570.1PREDICTED: uncharacterized protein LOC102718868                                        |
| TCONS_00013187 | -0.481478 | -2.02104   | -3.12454   | BGIOSGA025019 | XP_015690716.1 two pore potassium channel a isoform X1                                               |
| TCONS_00005965 | -0.481458 | -2.75195   | -1.37738   | BGIOSGA008101 | XP_015689400.1 RHOMBOID-like protein 9, chloroplastic                                                |
| TCONS_00004922 | -0.481078 | -0.147153  | -0.969768  | BGIOSGA000299 | XP_006645192.2PREDICTED: uncharacterized protein LOC102715626 isoform X1                             |
| TCONS_00020261 | -0.480717 | 1.12696    | 0.558673   | BGIOSGA013446 | XP_004961229.1homeobox-DDT domain protein RLT2                                                       |
| TCONS_00009551 | -0.480444 | -1.43873   | -0.737537  | BGIOSGA037665 | XP_015691287.1 heparanase-like protein 2 isoform X2                                                  |
| TCONS_00011982 | -0.480079 | 0.491842   | 0.288525   | BGIOSGA027456 | XP_015690223.1 tropinone reductase homolog At5g06060-like                                            |
| TCONS_00034221 | -0.47991  | -2.21674   | -1.6324    | BGIOSGA018773 | XP_015698574.1PREDICTED: uncharacterized protein LOC102710259                                        |
| TCONS_00007149 | -0.479866 | 1.06527    | 0.237708   | BGIOSGA009334 | XP_006648159.1 probable prolyl 4-hydroxylase 3                                                       |
| TCONS_00020120 | -0.479711 | -0.356388  | -1.76267   | BGIOSGA025373 | XP_004964857.1uncharacterized protein LOC101757286                                                   |
| TCONS_00014898 | -0.479545 | 0.617506   | 0.162483   | BGIOSGA003409 | XP_004976753.1probable ATP-dependent RNA helicase YTHDC2 isoform X4                                  |
| TCONS_00011677 | -0.479336 | 0.600045   | 0.150923   | BGIOSGA012825 | NP_001149295.140S ribosomal protein SA                                                               |
| TCONS_00007229 | -0.47925  | 0.202978   | 0.287543   | BGIOSGA019187 | XP_006648224.1 ATP-dependent helicase BRM                                                            |
| TCONS_00036759 | -0.47913  | -0.434764  | -0.322948  | BGIOSGA010816 | XP_006663859.1 fatty acid amide hydrolase-like                                                       |
| TCONS_00025248 | -0.478993 | 0.985102   | -0.764452  | BGIOSGA021835 | XP_002462959.1aspartic proteinase nepenthesin-1                                                      |
| TCONS_00026427 | -0.478897 | 0.278177   | 0.459312   | BGIOSGA021589 | XP_006659342.1 transcription initiation factor IIE subunit alpha                                     |
| TCONS_00013951 | -0.478763 | 0.34068    | 0.427735   | #N/A          | #N/A                                                                                                 |
| TCONS_00001058 | -0.478344 | 0.0378101  | 0.277188   | BGIOSGA003675 | XP_002436514.1DNA-damage-repair/tolerance protein DRT111, chloroplastic                              |
| TCONS_00020628 | -0.478344 | -2.42022   | -0.962565  | BGIOSGA030471 | XP_006659170.1 pyrophosphate-fructose 6-phosphate 1-phosphotransferase subunit alpha-like isoform X2 |
| TCONS_00009310 | -0.478288 | -2.36168   | -0.805938  | BGIOSGA011850 | XP_015690435.1 beta-glucuronosyltransferase GlcAT14A-like                                            |
| TCONS_00000213 | -0.477763 | 0.436491   | #N/A       | BGIOSGA002790 | XP_006643761.1 very-long-chain (3R)-3-hydroxyacyl-CoA dehydratase PASTICCINO 2A                      |
| TCONS_00036765 | -0.477736 | 0.606576   | -0.624784  | BGIOSGA034908 | XP_015698230.1 dystrophia myotonica WD repeat-containing protein-like                                |
| TCONS_00034425 | -0.477575 | -0.400885  | -0.298764  | BGIOSGA034384 | XP_006662785.1 F-box/WD-40 repeat-containing protein At3g52030                                       |
| TCONS_00013919 | -0.477451 | -2.35561   | -1.43316   | BGIOSGA016094 | XP_004960459.1protein GOS9                                                                           |



transcriptome

|                |           |            |            |               |                                                                                                                                                              |
|----------------|-----------|------------|------------|---------------|--------------------------------------------------------------------------------------------------------------------------------------------------------------|
| TCONS_00025914 | -0.477406 | -1.6102    | -0.0347571 | BGIOSGA027987 | XP_015695707.1 transcription factor MYB1R1-like isoform X2<br>XP_015694292.1 PREDICTED: LOW QUALITY PROTEIN: uncharacterized protein LOC102718371            |
| TCONS_00020233 | -0.477214 | -0.745192  | -0.0495362 | BGIOSGA019076 | XP_006644067.2 pentatricopeptide repeat-containing protein At1g80270, mitochondrial-like XP_004954316.1 ankyrin repeat domain-containing protein 13C-B       |
| TCONS_00036762 | -0.477098 | 0.0998627  | -0.155789  | BGIOSGA003268 | XP_009618235.1 polyubiquitin-like isoform X1 XP_006660444.2 DNA-directed RNA polymerase 1B, mitochondrial-like                                               |
| TCONS_00009022 | -0.477094 | 0.456189   | 0.077872   | BGIOSGA024393 | XP_004970880.1 fructokinase-1                                                                                                                                |
| TCONS_00021247 | -0.477021 | 1.34438    | -0.513357  | BGIOSGA031637 | XP_006658804.2 probable GTP diphosphokinase RSH3, chloroplastic                                                                                              |
| TCONS_00029645 | -0.476738 | 0.626941   | 0.33851    | BGIOSGA034120 | XP_021319113.1 probable metal-nicotianamine transporter YSL16                                                                                                |
| TCONS_00004880 | -0.476684 | -0.0111213 | -0.410857  | BGIOSGA027875 | XP_002437145.140S ribosomal protein S24-1 XP_006663975.1 phosphatidylinositol 3,4,5-trisphosphate 3-phosphatase and protein-tyrosine-phosphatase PTEN2A-like |
| TCONS_00025522 | -0.476625 | -1.29471   | -0.494619  | BGIOSGA028795 | XP_006655704.1 binding partner of ACD11 1-like XP_008681005.1 uncharacterized LOC100192009 isoform X1                                                        |
| TCONS_00016338 | -0.476251 | -0.221869  | -1.94328   | BGIOSGA007382 | XP_004952032.4 phosphatidate cytidylyltransferase 4, chloroplastic                                                                                           |
| TCONS_00020872 | -0.476225 | -0.0842986 | 0.0192181  | BGIOSGA000897 | XP_006660589.1 probable alpha, alpha-trehalose-phosphate synthase [UDP-forming] 9 XP_006659124.1 DNA topoisomerase 1-like                                    |
| TCONS_00037050 | -0.476177 | -0.208019  | -0.0964884 | BGIOSGA037267 | XP_022683954.1 uncharacterized protein LOC101758198                                                                                                          |
| TCONS_00019987 | -0.476017 | 0.869398   | -0.489455  | BGIOSGA014439 | XP_006648549.1 PREDICTED: uncharacterized protein LOC102715371                                                                                               |
| TCONS_00031309 | -0.475964 | 1.0146     | 0.569124   | BGIOSGA033284 | NP_001148142.2 triacylglycerol lipase precursor                                                                                                              |
| TCONS_00007279 | -0.475839 | -0.0121864 | -0.794826  | BGIOSGA007204 | XP_010228374.1 uncharacterized LOC104581721 isoform X1                                                                                                       |
| TCONS_00029945 | -0.475682 | -0.0666863 | 0.242456   | BGIOSGA011194 | XP_010493589.1 polyubiquitin-like                                                                                                                            |
| TCONS_00025933 | -0.475679 | 0.184887   | 0.22232    | BGIOSGA028006 | XP_021307999.1 histone-lysine N-methyltransferase 2E                                                                                                         |
| TCONS_00013777 | -0.475671 | -1.38059   | -1.07735   | BGIOSGA015538 | XP_003578817.1 thioredoxin M-type, chloroplastic                                                                                                             |
| TCONS_00007809 | -0.475406 | -0.0127316 | -0.255332  | BGIOSGA032637 | XP_004984930.1 uncharacterized protein LOC101768536                                                                                                          |
| TCONS_00037341 | -0.475331 | -0.154262  | -0.0499231 | BGIOSGA033900 | XP_006663114.1 DEAD-box ATP-dependent RNA helicase 40-like                                                                                                   |
| TCONS_00023152 | -0.475258 | -2.61976   | -0.421052  | BGIOSGA025189 | XP_006656565.1 pentatricopeptide repeat-containing protein At1g08070, chloroplastic-like XP_006657883.1 UDP-galactose transporter 2-like                     |
| TCONS_00014995 | -0.475202 | 0.629755   | -0.10221   | BGIOSGA027539 | XP_006652181.1 prolyl 4-hydroxylase 1                                                                                                                        |
| TCONS_00025321 | -0.474894 | -0.698996  | 0.0551309  | BGIOSGA002431 | XP_006643766.1 histone H2B.5                                                                                                                                 |
| TCONS_00036810 | -0.474789 | -0.339237  | -1.22878   | BGIOSGA038481 | XP_015698140.1 disease resistance protein RPP13-like                                                                                                         |
| TCONS_00011988 | -0.474355 | 1.22473    | 0.134385   | BGIOSGA019978 | XP_002453497.1 EIN3-binding F-box protein 1                                                                                                                  |
| TCONS_00034048 | -0.474106 | 0.599925   | -0.0961341 | BGIOSGA002293 | XP_006663745.1 probable chalcone-flavonone isomerase 3 isoform X1                                                                                            |
| TCONS_00019998 | -0.473998 | 0.865204   | 0.200616   | BGIOSGA030637 | XP_004973859.1 uncharacterized protein LOC101774238                                                                                                          |
| TCONS_00025413 | -0.473966 | -0.475591  | -0.876781  | BGIOSGA024014 | XP_015690840.1 probable ethylene response sensor 1                                                                                                           |
| TCONS_00014008 | -0.473593 | -0.91816   | -0.211709  | BGIOSGA016157 | XP_015691044.1 probable cytokinin riboside 5'-monophosphate phosphoribohydrolase LOGL3                                                                       |
| TCONS_00002842 | -0.473318 | 0.634013   | 0.393635   | BGIOSGA001568 | XP_006659442.1 protein ENHANCED DISEASE RESISTANCE 2                                                                                                         |
| TCONS_00033197 | -0.472951 | -0.248584  | -0.373763  | BGIOSGA034034 | XP_015699359.1 inositol hexakisphosphate and diphosphoinositol-pentakisphosphate kinase 2-like                                                               |
| TCONS_00007554 | -0.472894 | 1.14082    | 0.190973   | BGIOSGA008905 | XP_015691642.1 subtilisin-like protease SBT3.9 NP_001141336.1 Photosystem I chlorophyll a/b-binding protein 6 chloroplastic                                  |
| TCONS_00036556 | -0.471815 | -5.52146   | -3.40434   | BGIOSGA034619 | XP_002465062.1 uncharacterized protein LOC8066230                                                                                                            |
| TCONS_00026902 | -0.471652 | -2.92684   | -1.56566   | BGIOSGA029552 | XP_006649891.1 mitogen-activated protein kinase 5                                                                                                            |
| TCONS_00013015 | -0.471524 | -0.106491  | -0.232009  | BGIOSGA018780 | XP_015693465.1 ALBINO3-like protein 2, chloroplastic                                                                                                         |
| TCONS_00009159 | -0.471452 | -1.14886   | -0.516611  | BGIOSGA031196 | XP_00665110.1 protein decapping 5-like XP_006651435.1 PREDICTED: uncharacterized protein At4g17910 isoform X1                                                |
| TCONS_00026668 | -0.471366 | -1.42246   | -0.242621  | BGIOSGA018187 | XP_006654174.1 WPP domain-interacting tail-anchored protein 1-like isoform X2                                                                                |
| TCONS_00004502 | -0.471181 | -0.17345   | -0.231501  | BGIOSGA013359 | XP_006650464.1 uncharacterized membrane protein At4g09580                                                                                                    |
| TCONS_00030720 | -0.471118 | -1.0182    | -0.128407  | BGIOSGA004599 | XP_006645404.1 pectin acetyltransferase 5-like XP_006647523.1 two-component response regulator-like PRR1                                                     |
| TCONS_00029086 | -0.471105 | 0.0998406  | -0.957875  | BGIOSGA006945 | XP_004973827.1 wall-associated receptor kinase 3 isoform X1                                                                                                  |
| TCONS_00010349 | -0.470793 | -0.553486  | -0.841054  | BGIOSGA012925 | XP_006655351.1 protein NRT1/ PTR FAMILY 5.10-like                                                                                                            |
| TCONS_00012049 | -0.470639 | 1.08583    | -0.179116  | BGIOSGA029675 | XP_015694821.1 histone deacetylase HDT2-like XP_006662516.1 DNA excision repair protein ERCC-1                                                               |
| TCONS_00021704 | -0.470636 | -1.38875   | -0.672388  | BGIOSGA021819 |                                                                                                                                                              |
| TCONS_00020768 | -0.470613 | 0.42824    | 0.0939755  | BGIOSGA002630 |                                                                                                                                                              |
| TCONS_00010184 | -0.470456 | -1.25785   | -1.69425   | BGIOSGA012746 |                                                                                                                                                              |
| TCONS_00018896 | -0.470273 | -0.292632  | 0.379183   | BGIOSGA002054 |                                                                                                                                                              |
| TCONS_00010781 | -0.469986 | -0.527269  | -0.509752  | BGIOSGA030597 |                                                                                                                                                              |
| TCONS_00005191 | -0.469975 | -1.53927   | -1.45322   | BGIOSGA019042 |                                                                                                                                                              |
| TCONS_00006461 | -0.46937  | -0.678238  | 0.765878   | BGIOSGA008633 |                                                                                                                                                              |
| TCONS_00028254 | -0.469008 | -2.51121   | -0.832755  | BGIOSGA007841 |                                                                                                                                                              |
| TCONS_00019351 | -0.468936 | -4.76699   | -1.90705   | BGIOSGA023574 |                                                                                                                                                              |
| TCONS_00002383 | -0.468882 | -1.78667   | -0.247431  | BGIOSGA000285 |                                                                                                                                                              |
| TCONS_00032571 | -0.468852 | 0.42273    | 0.0927381  | BGIOSGA022550 |                                                                                                                                                              |

## transcriptome

|                 |           |            |            |               |                                                                                                      |
|-----------------|-----------|------------|------------|---------------|------------------------------------------------------------------------------------------------------|
| TCONS_00024666  | -0.468817 | -0.862662  | -1.1342    | BGIOSGA035835 | XP_003577366.12-methyl-6-phytyl-1,4-hydroquinone methyltransferase 2, chloroplastic                  |
| TCONS_00020068  | -0.468227 | 0.90521    | -0.416659  | #N/A          | #N/A                                                                                                 |
| TCONS_00016442  | -0.468215 | -0.381522  | -0.801627  | BGIOSGA024828 | XP_004976523.1dof zinc finger protein 1 isoform X2                                                   |
| TCONS_00006663  | -0.468169 | -0.921864  | -0.864801  | BGIOSGA008832 | XP_006648945.1PREDICTED: uncharacterized protein LOC102720683                                        |
| TCONS_00032188  | -0.468081 | -0.540414  | -1.20936   | BGIOSGA031946 | XP_006661765.1 pectinesterase 31                                                                     |
| TCONS_00003126  | -0.468079 | -1.39132   | -0.805175  | BGIOSGA030655 | XP_006645650.2 probable inactive receptor kinase At4g23740                                           |
| TCONS_00031435  | -0.468067 | 0.202478   | 0.26992    | BGIOSGA033249 | XP_004982657.1protein GRAVITROPIC IN THE LIGHT 1                                                     |
| TCONS_00002022  | -0.467993 | 0.444997   | -0.414378  | BGIOSGA033918 | XP_002456508.1leucine-rich repeat protein 1                                                          |
| TCONS_00019012  | -0.467979 | -0.38308   | -0.501397  | BGIOSGA018351 | XP_006654241.1 WD repeat-containing protein 91 homolog isoform X1                                    |
| TCONS_00006667  | -0.467589 | -1.00624   | -0.552304  | BGIOSGA016999 | XP_002454457.2E3 ubiquitin-protein ligase ATL4                                                       |
| TCONS_00011842  | -0.467549 | -0.342095  | -0.622701  | BGIOSGA008842 | XP_015691163.1 U-box domain-containing protein 30                                                    |
| TCONS_00033956  | -0.467268 | -3.44716   | -1.46371   | BGIOSGA037524 | XP_006663087.1 acyl-CoA-binding domain-containing protein 5                                          |
| TCONS_00005324  | -0.467248 | -1.66357   | -0.401113  | BGIOSGA018483 | XP_015688383.1PREDICTED: uncharacterized protein LOC102701975                                        |
| TCONS_00036306  | -0.467188 | -0.693896  | -0.0906933 | BGIOSGA009784 | XP_006657402.1 protein LEO1 homolog                                                                  |
| TCONS_00032716  | -0.46708  | 0.109549   | -1.37771   | BGIOSGA024281 | XP_015697100.1 nucleoside diphosphate kinase 1                                                       |
| TCONS_00032258  | -0.466703 | -0.830705  | -3.61497   | BGIOSGA030724 | XP_015696163.1 putative cinnamyl alcohol dehydrogenase 5                                             |
| TCONS_00016563  | -0.466645 | -2.92681   | -3.58708   | BGIOSGA014401 | XP_006652772.2 xyloglucan endotransglucosylase/hydrolase protein 24-like                             |
| TCONS_00012394  | -0.466056 | 0.221309   | -1.46302   | BGIOSGA010591 | XP_006650164.1 nodulation protein H-like isoform X1                                                  |
| TCONS_00012862  | -0.465979 | -0.388874  | -0.591644  | BGIOSGA012570 | XP_006651657.1 protein MPE1-like                                                                     |
| TCONS_00029614  | -0.465926 | 1.04698    | 0.180233   | #N/A          | #N/A                                                                                                 |
| TCONS_00005230  | -0.46591  | 0.642977   | -0.333114  | BGIOSGA022100 | XP_006646765.2 protein transport protein SEC16A homolog                                              |
| TCONS_00013573  | -0.465771 | 1.3387     | -0.357     | BGIOSGA009404 | XP_006650931.1 protein EXPORTIN 1A-like                                                              |
| TCONS_00017386  | -0.465578 | -0.886933  | -0.0194184 | BGIOSGA002066 | XP_006654172.1 cyclin-A1-4                                                                           |
| TCONS_00028959  | -0.465385 | -0.0906267 | 1.86193    | BGIOSGA029692 | XP_006661198.1 alpha,alpha-trehalose-phosphate synthase [UDP-forming] 6-like                         |
| TCONS_00010424  | -0.465269 | -1.54522   | -1.14304   | BGIOSGA007996 | XP_015689959.1 translation initiation factor IF-2 NP_001146378.2uncharacterized protein LOC100279956 |
| TCONS_00010860  | -0.465165 | 0.220187   | 0.579165   | BGIOSGA013481 | XP_002466344.1transcription factor PCF6                                                              |
| TCONS_000011083 | -0.465027 | -2.86745   | #N/A       | BGIOSGA009051 | XP_006649162.1 60S ribosomal protein L37-3-like                                                      |
| TCONS_00007097  | -0.465006 | -0.39102   | -0.438968  | BGIOSGA027921 | XP_006658056.1 magnesium-chelatase subunit ChlH, chloroplastic                                       |
| TCONS_00009976  | -0.464905 | -1.19767   | -0.808451  | BGIOSGA012530 | XP_006663137.1 GDSL esterase/lipase CPRD49 isoform X1                                                |
| TCONS_00034105  | -0.464903 | -1.38365   | -0.89809   | BGIOSGA037915 | XP_015692115.1 protein LOW PSII ACCUMULATION 1, chloroplastic                                        |
| TCONS_00003531  | -0.464896 | -1.19505   | -0.957151  | BGIOSGA015052 | XP_003557774.1uncharacterized protein LOC100846339                                                   |
| TCONS_00012385  | -0.464439 | 1.28831    | 0.117932   | BGIOSGA006854 | XP_015695672.1 transcription factor bHLH78-like                                                      |
| TCONS_00026974  | -0.464246 | -1.01045   | -0.0412446 | BGIOSGA021302 | XP_006645269.1PREDICTED: uncharacterized protein LOC102713692 isoform X2                             |
| TCONS_00005008  | -0.464156 | -2.68138   | -1.56686   | BGIOSGA004976 | XP_006652914.1 uncharacterized vacuolar membrane protein YML018C                                     |
| TCONS_00016730  | -0.463938 | -1.17851   | -0.283847  | BGIOSGA008696 | XP_015696504.1 putative receptor-like protein kinase At4g00960                                       |
| TCONS_00028980  | -0.463634 | 0.739606   | 0.231417   | BGIOSGA012144 | XP_006644531.1 protein prenyltransferase alpha subunit repeat-containing protein 1-B                 |
| TCONS_00001584  | -0.463604 | -1.08713   | -0.352299  | BGIOSGA004218 | XP_010232178.1atherin isoform X1                                                                     |
| TCONS_00004226  | -0.46357  | 0.858636   | 0.338173   | BGIOSGA000978 | XP_006660251.1 COP9 signalosome complex subunit 6a-like                                              |
| TCONS_00036449  | -0.463394 | -1.51805   | -0.814871  | BGIOSGA026733 | XP_004960932.1HMG box-containing protein 4                                                           |
| TCONS_00018456  | -0.463358 | 0.2484     | 0.613324   | BGIOSGA018980 | XP_015690089.1PREDICTED: uncharacterized protein LOC102718346, partial                               |
| TCONS_00011046  | -0.463103 | -0.14689   | -0.7743    | BGIOSGA013643 | XP_002460832.1uncharacterized protein LOC8084102                                                     |
| TCONS_00023880  | -0.463067 | -0.0293815 | 0.473408   | BGIOSGA034875 | XP_002442752.1protein LURP-one-related 8                                                             |
| TCONS_00033783  | -0.463029 | #N/A       | -0.429668  | BGIOSGA036743 | XP_015699208.1 replication protein A 70 kDa DNA-binding subunit D-like isoform X2                    |
| TCONS_00002584  | -0.462923 | -1.81869   | -0.699628  | #N/A          | XP_004969649.1golgin subfamily A member 2                                                            |
| TCONS_00004244  | -0.462716 | 1.35253    | 0.781107   | BGIOSGA009460 | XP_004957338.1uncharacterized protein LOC101756299                                                   |
| TCONS_00030353  | -0.462638 | -0.740871  | -1.46073   | BGIOSGA029446 | XP_006662085.1 probable methyltransferase PMT2                                                       |
| TCONS_00031659  | -0.462545 | -0.0632168 | -0.321967  | BGIOSGA012749 | XP_006664960.2 cysteine-rich receptor-like protein kinase 10                                         |
| TCONS_00020771  | -0.462338 | -1.29647   | -0.0746112 | BGIOSGA020192 | XP_004968851.1transcription factor MYBS1                                                             |
| TCONS_00001056  | -0.462268 | -0.615763  | -1.78359   | BGIOSGA040621 | XP_015691745.1 UPF0235 protein C15orf40 homolog                                                      |
| TCONS_00016913  | -0.462222 | -0.577521  | -0.189158  | BGIOSGA014050 | XP_006655917.1 probable DNA helicase MCM9                                                            |
| TCONS_00021865  | -0.46218  | -0.444764  | -0.34333   | BGIOSGA021655 | XP_004985025.1chaperone protein dnaJ 11, chloroplastic                                               |
| TCONS_00011887  | -0.461912 | 1.44272    | -0.199528  | BGIOSGA029119 | XP_006646926.1 cullin-associated NEDD8-dissociated protein 1                                         |
| TCONS_00005513  | -0.461813 | -0.17105   | 0.489956   | BGIOSGA007066 | #N/A                                                                                                 |
| TCONS_00007177  | -0.461403 | 0.408579   | 1.73618    | #N/A          | #N/A                                                                                                 |
| TCONS_00003420  | -0.46139  | -0.872019  | -1.26511   | BGIOSGA018213 | XP_015688249.1 phospholipase D zeta 1-like                                                           |
| TCONS_00011941  | -0.460569 | -0.239094  | 0.294413   | BGIOSGA011072 | XP_010228846.1protein DENND6B                                                                        |

## transcriptome

|                |           |            |            |               |                                                                                     |
|----------------|-----------|------------|------------|---------------|-------------------------------------------------------------------------------------|
| TCONS_00029644 | -0.460487 | -1.60158   | -1.19891   | BGIOSGA030166 | XP_006660441.1 probable 2-oxoglutarate-dependent dioxygenase At3g49630              |
| TCONS_00011971 | -0.460299 | -1.21427   | -1.22745   | BGIOSGA011041 | XP_006649816.1 PREDICTED: uncharacterized protein LOC102704874                      |
| TCONS_00020883 | -0.460089 | -3.93941   | -2.53959   | BGIOSGA019239 | XP_015693949.1 solute carrier family 40 member 1-like isoform X1                    |
| TCONS_00026222 | -0.459945 | 1.25597    | 0.449991   | BGIOSGA028302 | XP_006659971.1 cell wall integrity protein scw1                                     |
| TCONS_00011724 | -0.459569 | -1.8297    | -1.81682   | BGIOSGA021834 | XP_002465703.1 low affinity sulfate transporter 3                                   |
| TCONS_00021136 | -0.459503 | -0.0992756 | -0.155321  | BGIOSGA037365 | XP_015694441.1 protein S-acyltransferase 24-like                                    |
| TCONS_00014529 | -0.459425 | -1.13234   | -0.904464  | BGIOSGA022657 | XP_004976103.1 zinc finger protein CONSTANS-LIKE 3                                  |
| TCONS_00016692 | -0.459093 | 0.137961   | 0.0874937  | BGIOSGA014271 | XP_006653800.2 heterogeneous nuclear ribonucleoprotein U-like protein 1             |
| TCONS_00029988 | -0.459008 | -0.574279  | 0.00785533 | BGIOSGA036546 | XP_015697446.1 ABC transporter G family member 51                                   |
| TCONS_00006147 | -0.458993 | -1.72552   | -0.550958  | BGIOSGA008305 | XP_015689654.1 PREDICTED: uncharacterized protein LOC102706720 isoform X1           |
| TCONS_00011918 | -0.45898  | 0.957038   | 0.714153   | BGIOSGA029864 | XP_015691022.1 protein MOS2-like                                                    |
| TCONS_00030365 | -0.458941 | -1.44616   | -1.42179   | BGIOSGA015895 | XP_006660848.1 disease resistance protein RPM1-like                                 |
| TCONS_00037533 | -0.458904 | 0.0382345  | -0.322851  | BGIOSGA035833 | XP_006664204.1 putative hydrolase C777.06c                                          |
| TCONS_00001916 | -0.458852 | -0.196684  | 0.162742   | BGIOSGA007377 | XP_012700429.1 uncharacterized protein LOC101753625                                 |
| TCONS_00033707 | -0.458713 | -1.18201   | 0.216502   | BGIOSGA013751 | XP_015697863.1 F-box only protein 7-like isoform X1                                 |
| TCONS_00008464 | -0.458691 | -1.24214   | -0.691114  | BGIOSGA014667 | XP_015688674.1 E3 ubiquitin-protein ligase RMA1-like                                |
| TCONS_00000674 | -0.458568 | -0.473316  | -1.03299   | BGIOSGA026823 | XP_012472885.1 calmodulin-like                                                      |
| TCONS_00023741 | -0.458558 | -0.252319  | 0.591041   | BGIOSGA015356 | XP_004957811.1 protein FLX-like 1                                                   |
| TCONS_00006730 | -0.458415 | 0.490305   | 0.083705   | BGIOSGA008902 | XP_006647780.1 calpain-type cysteine protease ADL1                                  |
| TCONS_00025639 | -0.458407 | -0.824198  | -0.0697887 | BGIOSGA023787 | XP_015694478.1 PREDICTED: uncharacterized protein LOC102715777                      |
| TCONS_00017648 | -0.458374 | -0.276292  | -0.244036  | BGIOSGA006323 | XP_006654305.2 caffeoylshikimate esterase isoform X2                                |
| TCONS_00019906 | -0.458237 | 0.942396   | 0.818445   | BGIOSGA015140 | XP_006654865.1 probable esterase KAI2                                               |
| TCONS_00023260 | -0.458172 | -0.565758  | 0.168399   | BGIOSGA039314 | XP_006658350.2 methylmalonate-semialdehyde dehydrogenase [acylating], mitochondrial |
| TCONS_00023786 | -0.457934 | -0.0388681 | -0.0382019 | BGIOSGA007413 | XP_006657769.1 succinate dehydrogenase subunit 3-2, mitochondrial                   |
| TCONS_00013434 | -0.457894 | 0.766379   | -0.794955  | BGIOSGA005913 | XP_006650808.1 protein phosphatase 2C 35                                            |
| TCONS_00029241 | -0.457608 | -0.492627  | -0.180289  | BGIOSGA018655 | XP_006660750.1 protein ASPARTIC PROTEASE IN GUARD CELL 1-like                       |
| TCONS_00002405 | -0.457362 | 0.00490843 | -0.112533  | BGIOSGA005044 | XP_006645226.1 selenium-binding protein 1-like                                      |
| TCONS_00000972 | -0.45726  | -0.295125  | -0.136756  | BGIOSGA003572 | XP_006644190.1 nuclear pore complex protein NUP98A-like isoform X1                  |
| TCONS_00029273 | -0.457236 | -1.25863   | -1.27432   | BGIOSGA028998 | XP_006660784.1 PREDICTED: uncharacterized protein LOC102714857                      |
| TCONS_00030041 | -0.45723  | -0.455831  | -0.911071  | BGIOSGA000410 | XP_008652702.1 uncharacterized protein LOC103632738                                 |
| TCONS_00004190 | -0.457204 | 0.644097   | -0.173629  | BGIOSGA022960 | XP_015688308.1 protein DETOXIFICATION 12-like                                       |
| TCONS_00021137 | -0.457176 | 0.212938   | -0.0774592 | BGIOSGA023361 | XP_006656295.1 U3 small nucleolar RNA-associated protein 21 homolog                 |
| TCONS_00018678 | -0.457057 | -1.72747   | -0.589482  | BGIOSGA002348 | XP_006654083.1 E3 ubiquitin-protein ligase MBR2-like isoform X1                     |
| TCONS_00018854 | -0.456986 | -0.144759  | -0.479627  | BGIOSGA018563 | XP_006664912.1 post-GPI attachment to proteins factor 3                             |
| TCONS_00031221 | -0.456801 | -0.333175  | 0.455793   | BGIOSGA011438 | XP_015697006.1 protein GDAP2 homolog                                                |
| TCONS_00010515 | -0.456734 | -1.90863   | 0.287581   | BGIOSGA005135 | XP_006651602.2 calcium-transporting ATPase 2, plasma membrane-type-like             |
| TCONS_00012546 | -0.456599 | -0.62716   | -1.09532   | BGIOSGA006287 | XP_021313437.1 uncharacterized protein LOC8069552 isoform X3                        |
| TCONS_00034993 | -0.456545 | 1.23535    | -0.154219  | BGIOSGA017894 | NP_001169036.1 uncharacterized protein LOC100382872                                 |
| TCONS_00004598 | -0.456445 | -0.786483  | -1.482     | BGIOSGA000618 | XP_006644883.1 probable arabinosyltransferase ARAD1                                 |
| TCONS_00024406 | -0.456298 | -0.0463287 | -0.0685692 | BGIOSGA010939 | XP_006659000.1 importin-11                                                          |
| TCONS_00017537 | -0.456142 | -1.70221   | -1.24565   | BGIOSGA018383 | XP_003568697.1 receptor-like protein kinase FERONIA                                 |
| TCONS_00016465 | -0.456058 | -1.20821   | -0.339873  | BGIOSGA022460 | XP_015691835.1 E3 ubiquitin-protein ligase RHA1B-like                               |
| TCONS_00035425 | -0.455906 | -1.11718   | -0.695112  | BGIOSGA036838 | XP_006663701.1 protein TONNEAU 1a-like                                              |
| TCONS_00017795 | -0.455904 | 1.81397    | 0.00766292 | BGIOSGA015425 | XP_015693221.1 squamosa promoter-binding-like protein 9                             |
| TCONS_00018521 | -0.455852 | 0.286246   | -0.726842  | BGIOSGA018913 | XP_015692459.1 thylakoid membrane protein TERC, chloroplastic                       |
| TCONS_00017623 | -0.455464 | -0.813588  | -0.0607132 | BGIOSGA020546 | XP_006654293.1 nicotinamide adenine dinucleotide transporter 1, chloroplastic-like  |
| TCONS_00017370 | -0.455327 | -3.51988   | -2.9715    | BGIOSGA019435 | XP_006654168.1 PREDICTED: uncharacterized protein LOC102706101                      |
| TCONS_00004823 | -0.455287 | -1.1469    | -2.65376   | BGIOSGA037101 | XP_004970810.1 amino acid permease 4                                                |
| TCONS_00030537 | -0.455226 | 0.862962   | -0.160931  | BGIOSGA029268 | XP_015696732.1 protein SUPPRESSOR OF FRI 4                                          |
| TCONS_00038888 | -0.454983 | 0.405263   | 0.685339   | BGIOSGA000749 | XP_010240583.2 exocyst complex component EXO70A1 isoform X1                         |
| TCONS_00010397 | -0.454933 | 1.5183     | -0.994779  | BGIOSGA014643 | XP_006650257.1 elongation factor G, mitochondrial                                   |
| TCONS_00025005 | -0.45482  | 0.978922   | 0.906766   | BGIOSGA024394 | XP_006658508.1 ribosome biogenesis protein BOP1 homolog                             |
| TCONS_00013949 | -0.454696 | -0.304773  | 0.350403   | BGIOSGA032220 | XP_015691647.1 protein MICRORCHIDIA 7 isoform X1                                    |
| TCONS_00007548 | -0.454517 | -1.95739   | -2.01493   | BGIOSGA027931 | NP_001150620.1 F-box domain containing protein                                      |

transcriptome

|                |           |            |            |               |                                                                                          |
|----------------|-----------|------------|------------|---------------|------------------------------------------------------------------------------------------|
| TCONS_00017497 | -0.454367 | 0.626881   | -0.111714  | BGIOSGA019569 | XP_015692536.1 PREDICTED: uncharacterized protein LOC102712995                           |
| TCONS_00011924 | -0.454187 | 0.101419   | -0.376873  | BGIOSGA011088 | XP_015689836.1 chorismate synthase 2, chloroplatic                                       |
| TCONS_00002088 | -0.454174 | -0.216951  | -0.005383  | BGIOSGA013279 | NP_001167967.1 uncharacterized protein LOC100381683                                      |
| TCONS_00012610 | -0.453983 | -0.300536  | 0.150376   | BGIOSGA001307 | XP_006651570.2 pentatricopeptide repeat-containing protein At3g24000, mitochondrial-like |
| TCONS_00007176 | -0.453942 | -0.0253811 | -0.88167   | BGIOSGA038191 | XP_021315347.1 epimerase family protein SDR39U1 homolog, chloroplatic isoform X2         |
| TCONS_00025794 | -0.453906 | -1.07921   | -1.76289   | BGIOSGA002927 | XP_006659042.1 auxin-responsive protein IAA25-like isoform X2                            |
| TCONS_00011144 | -0.453901 | 0.464109   | -0.247792  | BGIOSGA020785 | XP_006651915.1 cactin                                                                    |
| TCONS_00000277 | -0.453816 | -0.924985  | 0.547711   | #N/A          | #N/A                                                                                     |
| TCONS_00035616 | -0.453768 | -0.553632  | -0.584398  | BGIOSGA034846 | XP_006664356.1 transcription factor LHW-like                                             |
| TCONS_00006952 | -0.453746 | -0.683987  | -0.430953  | BGIOSGA009134 | XP_006647993.1 PREDICTED: uncharacterized protein LOC102707465 isoform X1                |
| TCONS_00003667 | -0.453659 | 0.414049   | 0.68366    | BGIOSGA029631 | XP_003567758.1 probable protein phosphatase 2C 3 isoform X2                              |
| TCONS_00031597 | -0.453565 | -1.14501   | -0.739072  | BGIOSGA026271 | XP_015697432.1 mediator of RNA polymerase II transcription subunit 12-like isoform X2    |
| TCONS_00013893 | -0.453373 | 1.06968    | 0.242139   | BGIOSGA005951 | XP_004975218.1 WRKY transcription factor WRKY51                                          |
| TCONS_00013542 | -0.453292 | -1.1792    | -0.775058  | BGIOSGA001322 | NP_001130540.1 putative DUF2301 domain protein                                           |
| TCONS_00006777 | -0.453239 | -1.05115   | -1.2072    | BGIOSGA000378 | XP_006647812.2 probable amino acid permease 7                                            |
| TCONS_00004174 | -0.453025 | -4.21203   | -1.80691   | BGIOSGA001024 | XP_015688292.1 transcription factor-like protein DPB isoform X1                          |
| TCONS_00008247 | -0.453025 | 0.488405   | 0.822445   | BGIOSGA006181 | XP_006648785.1 CTL-like protein DDB_G0274487                                             |
| TCONS_00018590 | -0.452703 | -1.12498   | -0.559788  | BGIOSGA018846 | XP_015692843.1 PREDICTED: uncharacterized protein LOC102708524                           |
| TCONS_00020915 | -0.452697 | -1.49533   | 0.19697    | BGIOSGA018014 | XP_006656180.1 beta-galactosidase 9-like                                                 |
| TCONS_00005825 | -0.452634 | -0.403756  | 0.365958   | BGIOSGA007949 | XP_006647150.1 gamma-secretase subunit APH1-like                                         |
| TCONS_00030457 | -0.452546 | 0.0259843  | 0.33622    | BGIOSGA014652 | XP_006660917.2 aspartic proteinase-like protein 1                                        |
| TCONS_00033088 | -0.451888 | -0.441502  | -0.496187  | BGIOSGA037090 | XP_006663263.1 SWI/SNF complex subunit SWI3C isoform X1                                  |
| TCONS_00026375 | -0.451852 | -1.37848   | -0.386489  | BGIOSGA015377 | XP_015696837.1 PREDICTED: uncharacterized protein LOC102722801 isoform X2                |
| TCONS_00033443 | -0.451849 | -0.741514  | -0.233725  | BGIOSGA026603 | XP_015698125.1 GDT1-like protein 3                                                       |
| TCONS_00011653 | -0.451392 | -1.79043   | -0.0512906 | BGIOSGA011355 | XP_002452410.2 uncharacterized protein LOC8056495 isoform X1                             |
| TCONS_00024206 | -0.45084  | 0.540093   | 1.18765    | BGIOSGA003982 | XP_004958497.1 probable carboxylesterase 18                                              |
| TCONS_00019061 | -0.450664 | -0.215016  | 0.887649   | BGIOSGA025325 | XP_024041499.1 tRNA (guanine(26)-N(2))-dimethyltransferase isoform X2                    |
| TCONS_00032630 | -0.450524 | -0.818728  | -1.82987   | BGIOSGA006243 | XP_006662559.1 MLO-like protein 9                                                        |
| TCONS_00018525 | -0.450478 | -1.4079    | 0.27421    | BGIOSGA018910 | XP_006653986.1 DNA repair protein RAD51 homolog 2                                        |
| TCONS_00035594 | -0.450471 | 0.190796   | -0.228412  | BGIOSGA034831 | XP_003574083.1 uncharacterized protein LOC100821945                                      |
| TCONS_00006879 | -0.450317 | 0.0615811  | -1.16248   | BGIOSGA021627 | XP_004955213.1 transcription termination factor MTERF6, chloroplatic/mitochondrial       |
| TCONS_00022976 | -0.450301 | -1.08006   | -1.39301   | BGIOSGA025010 | XP_006657394.1 probable serine/threonine-protein kinase DDB_G0278509                     |
| TCONS_00002420 | -0.450248 | -0.241536  | -1.26363   | BGIOSGA005062 | XP_015698734.1 haloalkane dehalogenase 2 isoform X1                                      |
| TCONS_00015671 | -0.449801 | 0.693635   | 0.040397   | #N/A          | #N/A                                                                                     |
| TCONS_00006154 | -0.449725 | 0.25235    | 0.181424   | BGIOSGA008067 | XP_006647256.1 protein MEI2-like 4                                                       |
| TCONS_00032006 | -0.449686 | -0.262051  | -0.291654  | BGIOSGA000791 | XP_015698964.1 phosphatidate cytidylyltransferase 1-like                                 |
| TCONS_00023327 | -0.449557 | -4.21641   | 0.271925   | BGIOSGA018731 | XP_006657546.1 PREDICTED: uncharacterized protein LOC102711713                           |
| TCONS_00000039 | -0.449355 | 1.48378    | 0.827819   | BGIOSGA027363 | XP_006648168.1 pentatricopeptide repeat-containing protein At1g61870, mitochondrial-like |
| TCONS_00005251 | -0.449247 | -1.06543   | -2.72745   | BGIOSGA026711 | XP_003570794.1 linolenate hydroperoxide lyase, chloroplatic                              |
| TCONS_00030067 | -0.449122 | 1.97287    | -0.646688  | BGIOSGA016708 | XP_003578136.1 putrescine hydroxycinnamoyltransferase 1                                  |
| TCONS_00017099 | -0.449007 | -1.90045   | 0.385938   | BGIOSGA010029 | XP_015692474.1 PREDICTED: uncharacterized protein LOC102707121                           |
| TCONS_00006776 | -0.448934 | 0.812553   | -0.272759  | BGIOSGA005431 | XP_006647811.1 transmembrane 9 superfamily member 12-like                                |
| TCONS_00007949 | -0.448828 | -0.15285   | 0.22979    | BGIOSGA006531 | XP_015688583.1 conserved oligomeric Golgi complex subunit 4                              |
| TCONS_00008186 | -0.448623 | -0.115976  | -1.49679   | BGIOSGA004909 | XP_015689466.1 chloride channel protein CLC-c-like                                       |
| TCONS_00004072 | -0.448354 | 0.0835489  | -1.33725   | BGIOSGA016610 | XP_006646148.1 potassium channel AKT1 isoform X2                                         |
| TCONS_00027211 | -0.448273 | -1.00857   | -0.689429  | BGIOSGA003715 | XP_006659029.1 indole-2-monooxygenase-like                                               |
| TCONS_00033297 | -0.448136 | -2.51193   | -1.05575   | BGIOSGA020982 | XP_004979163.1 protein NRT1/PTR FAMILY 4.5                                               |
| TCONS_00007944 | -0.448062 | -0.100646  | -0.410211  | BGIOSGA021986 | XP_006647243.1 probable protein transport Sec1a                                          |
| TCONS_00037136 | -0.447595 | -3.3673    | -2.14376   | BGIOSGA037333 | NP_001266910.1 fatty acid alpha-dioxygenase                                              |
| TCONS_00037541 | -0.44746  | -0.823849  | -1.10761   | BGIOSGA035824 | XP_006664751.2 K(+) efflux antiporter 3, chloroplatic                                    |
| TCONS_00016084 | -0.447318 | -1.93435   | 1.11681    | BGIOSGA017830 | XP_020214401.1 beta-glucosidase 24-like                                                  |
| TCONS_00016578 | -0.44728  | -0.190653  | -0.595314  | BGIOSGA014391 | XP_006652786.1 putative RNA methyltransferase At5g10620                                  |
| TCONS_00035869 | -0.446944 | -0.421408  | -0.326757  | BGIOSGA026299 | XP_015698268.1 pentatricopeptide repeat-containing protein At3g46610-like                |
| TCONS_00025737 | -0.446767 | -1.02991   | -0.128417  | BGIOSGA023685 | XP_015694806.1 importin subunit alpha-4                                                  |
| TCONS_00016155 | -0.446728 | -1.00119   | -0.999796  | BGIOSGA014734 | XP_006652450.1 inositol transporter 1                                                    |

transcriptome

|                |           |            |            |               |                                                                                                   |
|----------------|-----------|------------|------------|---------------|---------------------------------------------------------------------------------------------------|
| TCONS_00003377 | -0.446684 | -0.220527  | -0.530218  | BGIOSGA019128 | XP_006644092.1 probable protein phosphatase 2C 2                                                  |
| TCONS_00035731 | -0.446129 | -0.351018  | -1.47104   | #N/A          | #N/A                                                                                              |
| TCONS_00008052 | -0.446063 | -0.201279  | 0.573142   | BGIOSGA003024 | XP_006648665.1 extensin                                                                           |
| TCONS_00019472 | -0.445889 | -0.739462  | 0.378799   | BGIOSGA017880 | XP_015693287.1PREDICTED: uncharacterized protein LOC102720798 isoform X1                          |
| TCONS_00021420 | -0.445876 | 0.186399   | 0.227579   | BGIOSGA022730 | XP_006656524.1 tRNA dimethylallyltransferase 9                                                    |
| TCONS_00026523 | -0.445794 | 1.22485    | 0.632657   | BGIOSGA028589 | XP_006660096.1 protein Dr1 homolog                                                                |
| TCONS_00028392 | -0.445769 | -0.0342655 | 0.271985   | BGIOSGA026572 | XP_014756044.1pentatricopeptide repeat-containing protein At2g22410, mitochondrial                |
| TCONS_00019798 | -0.445759 | -0.316249  | 0.40626    | BGIOSGA017560 | XP_006654788.2PREDICTED: uncharacterized protein LOC102721553                                     |
| TCONS_00000743 | -0.445611 | -1.07752   | -1.20234   | BGIOSGA020246 | XP_015688318.1PREDICTED: uncharacterized protein LOC102719635                                     |
| TCONS_00029977 | -0.445457 | 0.772649   | 0.372535   | BGIOSGA026961 | XP_004956731.1U-box domain-containing protein 39                                                  |
| TCONS_00003964 | -0.445367 | 0.452044   | -0.478475  | BGIOSGA001226 | XP_006644358.1 protein YIPF1 homolog                                                              |
| TCONS_00022204 | -0.445328 | -1.32426   | -0.365815  | BGIOSGA022397 | XP_004965431.1probable transcription factor GLK1                                                  |
| TCONS_00005514 | -0.445026 | -0.390426  | -0.411236  | BGIOSGA031106 | XP_006646937.2 pentatricopeptide repeat-containing protein At2g35130                              |
| TCONS_00025587 | -0.445012 | -1.69355   | -2.65434   | BGIOSGA012718 | XP_015694786.1 pyruvate dehydrogenase (acetyl-transferring) kinase, mitochondrial-like isoform X1 |
| TCONS_00010872 | -0.445009 | -1.00282   | -0.930893  | BGIOSGA005517 | XP_006650525.1 inositol-tetrakisphosphate 1-kinase 3                                              |
| TCONS_00012725 | -0.444825 | -0.679039  | 0.0705189  | BGIOSGA001893 | XP_015699151.1 exportin-7-A isoform X1                                                            |
| TCONS_00025886 | -0.444678 | -2.90986   | -0.842918  | BGIOSGA027961 | XP_015695488.1 blue copper protein-like                                                           |
| TCONS_00027775 | -0.444571 | -0.417537  | 0.0942115  | #N/A          | #N/A                                                                                              |
| TCONS_00026513 | -0.444465 | -0.515694  | -0.157826  | BGIOSGA018994 | XP_006660094.2 probable phospholipid-transporting ATPase 8                                        |
| TCONS_00016206 | -0.444412 | 0.622463   | 0.619488   | BGIOSGA020957 | XP_003580095.1polyadenylate-binding protein 2                                                     |
| TCONS_00009397 | -0.444379 | -1.35704   | -0.624293  | BGIOSGA031952 | XP_015690912.1 cyclic dof factor 1-like                                                           |
| TCONS_00021528 | -0.444143 | 0.0986147  | 0.234695   | BGIOSGA019454 | XP_015694199.1 calcium-dependent protein kinase 34                                                |
| TCONS_00005941 | -0.444068 | -0.791144  | -0.278561  | BGIOSGA006581 | XP_010234161.1 fatty-acid-binding protein 3, chloroplastic                                        |
| TCONS_00014201 | -0.443866 | -0.521908  | -0.444631  | BGIOSGA008356 | XP_003581199.1 protein BIC1                                                                       |
| TCONS_00028582 | -0.443864 | #N/A       | 0.845378   | BGIOSGA036057 | XP_006664082.1 golgin candidate 6                                                                 |
| TCONS_00017055 | -0.443521 | 1.22526    | -0.376872  | BGIOSGA031869 | XP_008656525.1putative serine/threonine-protein kinase-like protein CCR3                          |
| TCONS_00037342 | -0.443516 | -0.405813  | 0.0821097  | BGIOSGA036086 | XP_006664088.1 trafficking protein particle complex II-specific subunit 130 homolog isoform X2    |
| TCONS_00016760 | -0.443211 | -0.263093  | 0.0370934  | BGIOSGA012043 | XP_006652928.2 probable sulfate transporter 3.3                                                   |
| TCONS_00017185 | -0.443103 | 0.973124   | 0.094887   | BGIOSGA027531 | XP_006654079.1 ubiquitin-40S ribosomal protein S27a                                               |
| TCONS_00009457 | -0.443066 | -0.722032  | -1.3824    | BGIOSGA023496 | XP_024313762.1transmembrane protein 131                                                           |
| TCONS_00034865 | -0.441967 | 0.42921    | 0.0362196  | BGIOSGA002574 | XP_006662936.1 40S ribosomal protein S5                                                           |
| TCONS_00027006 | -0.441816 | -0.252791  | -0.338154  | BGIOSGA011914 | XP_015695792.1 ACT domain-containing protein ACR6-like                                            |
| TCONS_00037970 | -0.441743 | 0.701992   | -0.896777  | BGIOSGA035180 | XP_006664993.1 protein KTI12 homolog                                                              |
| TCONS_00011782 | -0.441701 | 0.714878   | 1.11764    | BGIOSGA011223 | XP_006649619.1 probable leucine-rich repeat receptor-like protein kinase At1g35710                |
| TCONS_00003851 | -0.441648 | -0.0763936 | -0.0414643 | BGIOSGA001363 | XP_015699277.1 DENN domain and WD repeat-containing protein SCD1                                  |
| TCONS_00017202 | -0.441615 | -2.13595   | -0.355904  | BGIOSGA002851 | XP_015692837.1PREDICTED: LOW QUALITY PROTEIN: uncharacterized protein LOC102704801                |
| TCONS_00018952 | -0.441511 | -4.80497   | -0.901664  | BGIOSGA040670 | XP_006654183.1 random slug protein 5-like isoform X2                                              |
| TCONS_00015036 | -0.441374 | -0.886178  | -0.110777  | BGIOSGA017218 | XP_006652894.1 probable 20S rRNA accumulation protein 4                                           |
| TCONS_00028813 | -0.440751 | 0.447283   | -0.433512  | BGIOSGA029313 | XP_006661143.2 probable LRR receptor-like serine/threonine-protein kinase At1g07650               |
| TCONS_00036430 | -0.440688 | -0.688496  | -0.924406  | BGIOSGA025162 | XP_010237011.1transcription factor PCF8                                                           |
| TCONS_00014748 | -0.440172 | 0.825427   | 0.074314   | BGIOSGA005729 | XP_006665126.1PREDICTED: uncharacterized protein LOC102715819                                     |
| TCONS_00036484 | -0.439995 | 2.55856    | 0.547807   | BGIOSGA037492 | XP_006664231.1PREDICTED: uncharacterized protein LOC102709977                                     |
| TCONS_00001259 | -0.439861 | 0.473464   | -0.182055  | BGIOSGA008512 | XP_002455879.1protein SYS1 homolog                                                                |
| TCONS_00023949 | -0.439578 | 0.0877144  | 0.36235    | BGIOSGA024188 | XP_021311360.1uncharacterized protein LOC8061824                                                  |
| TCONS_00016211 | -0.439274 | -0.438843  | -0.443956  | BGIOSGA012519 | XP_006653582.2 probable leucine-rich repeat receptor-like protein kinase At5g63930                |
| TCONS_00016699 | -0.43923  | 0.647519   | 0.294398   | BGIOSGA018800 | XP_002448602.1N-terminal acetyltransferase A complex catalytic subunit NAA10                      |
| TCONS_00010619 | -0.439212 | 0.52466    | -0.343099  | BGIOSGA012138 | XP_015690460.1 glucan endo-1,3-beta-glucosidase 8-like                                            |
| TCONS_00015423 | -0.438959 | -0.391826  | -0.128985  | BGIOSGA000082 | XP_015692142.1 protein O-linked-mannose beta-1,4-N-acetylglucosaminyltransferase 2-like           |
| TCONS_00006704 | -0.438953 | 0.679326   | 0.230366   | BGIOSGA017042 | XP_006652746.1 60S ribosomal protein L12-1                                                        |
| TCONS_00031598 | -0.438739 | -2.11348   | 0.0395287  | BGIOSGA016965 | XP_002451500.1uncharacterized protein LOC8057532                                                  |
| TCONS_00020576 | -0.438418 | -0.594892  | -0.103104  | BGIOSGA022753 | XP_015693918.1 GPI-anchored protein LORELEI-like isoform X1                                       |
| TCONS_00001844 | -0.438394 | -1.40302   | -0.858773  | BGIOSGA026441 | NP_001148308.2RING-H2 finger protein ATL2K                                                        |
| TCONS_00006007 | -0.437961 | -0.875877  | 0.157498   | BGIOSGA008153 | XP_006647319.1 putative disease resistance RPP13-like protein 1                                   |
| TCONS_00029255 | -0.437858 | -0.281775  | -0.901661  | BGIOSGA028950 | XP_006660760.1 tonoplast dicarboxylate transporter-like                                           |
| TCONS_00033615 | -0.437375 | -1.39006   | -0.253357  | BGIOSGA033854 | XP_023157350.1F-box/FBD/LRR-repeat protein At1g13570-like isoform X1                              |

transcriptome

|                |           |            |            |               |                                                                                             |
|----------------|-----------|------------|------------|---------------|---------------------------------------------------------------------------------------------|
| TCONS_00029158 | -0.437308 | -0.901035  | -0.0765521 | BGIOSGA011997 | XP_006660701.1 probable LRR receptor-like serine/threonine-protein kinase At1g67720         |
| TCONS_00029331 | -0.43725  | -0.829423  | -0.471653  | BGIOSGA031079 | XP_006660832.1 hsp70 nucleotide exchange factor FES1                                        |
| TCONS_00013640 | -0.437195 | 0.974236   | -0.0210566 | BGIOSGA000898 | XP_006647249.1 elongation factor 2-like XP_022682261.1 uncharacterized protein LOC101768145 |
| TCONS_00030109 | -0.43691  | -1.64749   | -0.990088  | BGIOSGA029696 | XP_015697824.1 meiotic recombination protein DMC1 homolog                                   |
| TCONS_00034291 | -0.436869 | 0.571632   | 0.870449   | BGIOSGA036642 | XP_010940715.1 60S ribosomal protein L23                                                    |
| TCONS_00009279 | -0.436859 | 0.329988   | -0.138477  | BGIOSGA009276 | XP_015690781.1 alpha-glucosidase 2-like                                                     |
| TCONS_00002427 | -0.436477 | 0.32227    | 0.194195   | BGIOSGA005070 | XP_006647103.1 aquaporin NIP1-1                                                             |
| TCONS_00007659 | -0.436358 | -3.72753   | -0.323295  | BGIOSGA002176 | XP_006645240.1 PREDICTED: uncharacterized protein At3g27210                                 |
| TCONS_00002421 | -0.436323 | -0.0848853 | -0.190972  | BGIOSGA010464 | XP_015698081.1 phospholipid-transporting ATPase 2-like isoform X2                           |
| TCONS_00033408 | -0.436321 | 0.0831883  | -0.416986  | BGIOSGA010822 | XP_006650608.1 60S ribosomal protein L13a-4                                                 |
| TCONS_00010983 | -0.43621  | 0.408022   | -0.374325  | BGIOSGA001590 | XP_006657095.1 probable LRR receptor-like serine/threonine-protein kinase At1g14390         |
| TCONS_00020951 | -0.436197 | -1.40503   | -1.55467   | BGIOSGA014071 | XP_006656565.1 pentatricopeptide repeat-containing protein At1g08070, chloroplastic-like    |
| TCONS_00004643 | -0.43612  | -0.949043  | 1.31181    | BGIOSGA013657 | XP_004953842.1 glutamine synthetase cytosolic isozyme 1-1                                   |
| TCONS_00008767 | -0.436109 | -0.417065  | -2.25975   | BGIOSGA014182 | XP_015692529.1 auxin-responsive protein IAA4-like                                           |
| TCONS_00000699 | -0.436047 | -1.22304   | -0.606737  | BGIOSGA009237 | XP_014754480.1 protein NRT1/ PTR FAMILY 5.10                                                |
| TCONS_00002253 | -0.435907 | -2.06558   | -0.425555  | BGIOSGA004740 | XP_006658415.1 protein LURP-one-related 15-like                                             |
| TCONS_00024797 | -0.43562  | -1.01712   | -1.92974   | BGIOSGA009564 | XP_006644804.1 sphingosine kinase 2-like                                                    |
| TCONS_00004514 | -0.435561 | -0.69019   | -0.028369  | BGIOSGA000699 | XP_015689063.1 non-structural maintenance of chromosomes element 4 homolog A-like           |
| TCONS_00007524 | -0.435545 | -0.314493  | 0.832642   | BGIOSGA023272 | XP_004971243.1 U-box domain-containing protein 43                                           |
| TCONS_00005092 | -0.434894 | -0.263122  | -0.221895  | BGIOSGA039225 | XP_006651288.1 protein SCAR2-like                                                           |
| TCONS_00012096 | -0.434853 | -0.978181  | -0.642899  | BGIOSGA013820 |                                                                                             |
| TCONS_00007975 | -0.434789 | -1.03848   | -0.809887  | BGIOSGA006508 | XP_006647309.2 7-dehydrocholesterol reductase                                               |
| TCONS_00000527 | -0.43451  | -0.467077  | -0.0475051 | BGIOSGA003098 | XP_015697724.1 DDB1- and CUL4-associated factor 13                                          |
| TCONS_00002224 | -0.434356 | -0.329391  | -0.258527  | BGIOSGA036588 | XP_006646502.1 transcription factor LHW-like                                                |
| TCONS_00014099 | -0.434351 | 0.123869   | 0.322289   | BGIOSGA005460 | XP_006652209.1 vacuolar protein-sorting-associated protein 11 homolog                       |
| TCONS_00030409 | -0.434198 | 0.913606   | 0.34376    | BGIOSGA029392 | NP_001131256.2 uncharacterized LOC100192569                                                 |
| TCONS_00028800 | -0.433426 | 0.969218   | -2.45611   | BGIOSGA014279 | XP_006661137.1 probable kinase CHARK                                                        |
| TCONS_00036953 | -0.433425 | -2.69141   | -1.59163   | BGIOSGA037500 | XP_006663945.2 glutathione synthetase, chloroplastic-like                                   |
| TCONS_00035467 | -0.433277 | -1.03604   | -1.33813   | BGIOSGA000316 | XP_006663744.1 probable non-specific lipid-transfer protein 3                               |
| TCONS_00002066 | -0.433276 | -0.208086  | 0.00503361 | BGIOSGA001037 | XP_014754699.1 ubiquitin-conjugating enzyme E2-17 kDa isoform X1                            |
| TCONS_00014582 | -0.432893 | -0.438368  | -1.72585   | BGIOSGA015013 | XP_006652499.1 PREDICTED: uncharacterized protein LOC102701719                              |
| TCONS_00013331 | -0.432784 | -0.712782  | -1.92995   | BGIOSGA005739 | XP_006650720.1 PREDICTED: uncharacterized protein LOC102708783                              |
| TCONS_00016083 | -0.432608 | -4.01648   | -1.90806   | BGIOSGA011222 | XP_006652404.2 beta-glucosidase 10-like                                                     |
| TCONS_00017912 | -0.432565 | -1.09117   | -1.32987   | BGIOSGA007188 | XP_006655369.2 beta-glucosidase BoGH3B-like isoform X2                                      |
| TCONS_00018919 | -0.432177 | -0.480367  | -0.328543  | BGIOSGA018437 | XP_015691155.1 switch 2                                                                     |
| TCONS_00020713 | -0.432147 | -0.953825  | 0.494703   | BGIOSGA009239 | XP_022679633.1 quinone oxidoreductase PIG3                                                  |
| TCONS_00016554 | -0.43209  | -1.18399   | -0.061958  | BGIOSGA030174 | NP_001146059.1 putative putrescine-binding domain family protein                            |
| TCONS_00023476 | -0.431906 | -0.841235  | -0.939056  | BGIOSGA035998 | XP_006664107.1 psbP domain-containing protein 1, chloroplastic                              |
| TCONS_00006892 | -0.431764 | -0.970645  | -0.125166  | BGIOSGA027012 | XP_004953951.1 PLAT domain-containing protein 3                                             |
| TCONS_00014339 | -0.431691 | -0.375065  | 0.0590287  | BGIOSGA028483 | XP_015691477.1 mitochondrial phosphate carrier protein 3, mitochondrial-like                |
| TCONS_00001914 | -0.431611 | -0.759146  | -0.717399  | BGIOSGA028580 | XP_008652974.1 putative cysteine-rich receptor-like protein kinase 35                       |
| TCONS_00014274 | -0.431496 | 0.299226   | -0.0354791 | #N/A          | #N/A                                                                                        |
| TCONS_00007045 | -0.431426 | -0.148771  | -0.145695  | BGIOSGA009229 | XP_006649138.1 N-alpha-acetyltransferase 35, NatC auxiliary subunit isoform X1              |
| TCONS_00001170 | -0.431362 | -0.487668  | 0.337069   | BGIOSGA003797 | XP_006646017.2 carbamoyl-phosphate synthase large chain, chloroplastic                      |
| TCONS_00028303 | -0.43089  | -1.10422   | 0.303835   | BGIOSGA034215 | XP_006660283.1 PREDICTED: uncharacterized protein LOC102721105, partial                     |
| TCONS_00022330 | -0.430721 | -1.9555    | #N/A       | BGIOSGA009516 | XP_015694249.1 cell number regulator 4-like isoform X2                                      |
| TCONS_00016485 | -0.430721 | -0.955498  | 0.0761298  | BGIOSGA029303 | XP_010504143.1 histone H4                                                                   |
| TCONS_00018467 | -0.430667 | -0.343335  | -0.164054  | BGIOSGA036558 | XP_009337683.1 V-type proton ATPase 16 kDa proteolipid subunit-like                         |
| TCONS_00036558 | -0.430413 | -0.928458  | 0.151327   | BGIOSGA032100 | XP_006664280.1 vacuolar-sorting receptor 1-like                                             |
| TCONS_00025927 | -0.430355 | -0.959905  | -0.422515  | BGIOSGA016851 | XP_006659117.1 sphingoid long-chain bases kinase 1-like                                     |
| TCONS_00033922 | -0.430223 | 0.0510876  | -0.338403  | BGIOSGA018537 | XP_006663628.2 glutathione synthetase, chloroplastic-like                                   |
| TCONS_00021374 | -0.43022  | 0.218921   | 0.402521   | BGIOSGA023602 | XP_002441742.1 UV radiation resistance-associated gene protein                              |
| TCONS_00027317 | -0.430036 | -0.471627  | -0.44121   | BGIOSGA007014 | XP_015695490.1 U-box domain-containing protein 8-like                                       |
| TCONS_00005417 | -0.430034 | 1.04371    | 1.48947    | #N/A          | #N/A                                                                                        |
| TCONS_00020745 | -0.430034 | 0.365641   | -0.510528  | #N/A          | #N/A                                                                                        |

transcriptome

|                |           |            |            |               |                                                                                           |
|----------------|-----------|------------|------------|---------------|-------------------------------------------------------------------------------------------|
| TCONS_00034995 | -0.430024 | 1.34258    | 0.0173735  | BGIOSGA017692 | XP_003577502.1 respiratory burst oxidase homolog protein B                                |
| TCONS_00037320 | -0.430021 | 1.15825    | 1.53357    | BGIOSGA036047 | XP_006664085.1 calmodulin-binding protein 60 D-like isoform X1                            |
| TCONS_00022662 | -0.429906 | 1.62337    | -0.441535  | BGIOSGA005812 | XP_006657194.1 WRKY transcription factor 18-like                                          |
| TCONS_00007522 | -0.429874 | 0.171213   | -0.199784  | BGIOSGA017105 | XP_006648411.1 brefeldin A-inhibited guanine nucleotide-exchange protein 1                |
| TCONS_00019142 | -0.42972  | 0.297361   | -1.62257   | BGIOSGA026862 | XP_003568623.1 probable protein phosphatase 2C 48                                         |
| TCONS_00011176 | -0.429657 | 0.664455   | 0.120486   | BGIOSGA028281 | XP_006650761.1 cytochrome b-c1 complex subunit 7-like                                     |
| TCONS_00011743 | -0.429413 | -1.19635   | -0.29721   | BGIOSGA008192 | XP_006649583.1 mitochondrial outer membrane protein porin 5                               |
| TCONS_00029574 | -0.429182 | 1.14428    | -0.0653154 | BGIOSGA026430 | XP_012699597.2 transcription factor MYB44-like                                            |
| TCONS_00005052 | -0.429077 | -1.00558   | 0.0241627  | BGIOSGA035641 | XP_006645298.1 lipase-like                                                                |
| TCONS_00000973 | -0.428819 | -0.314544  | 0.083636   | BGIOSGA008872 | XP_024314430.1 probable LRR receptor-like serine/threonine-protein kinase RKF3 isoform X1 |
| TCONS_00037544 | -0.428544 | 0.358181   | 0.427008   | BGIOSGA010143 | XP_006664755.1 GTPase LSG1-2-like                                                         |
| TCONS_00009713 | -0.428153 | 0.895768   | -0.174779  | BGIOSGA011394 | XP_015691176.1 myosin-binding protein 2 isoform X2                                        |
| TCONS_00016929 | -0.428044 | 1.8989     | 0.496995   | BGIOSGA014035 | XP_006653918.1 DDB1- and CUL4-associated factor homolog 1                                 |
| TCONS_00021473 | -0.427662 | -0.399561  | -0.257469  | BGIOSGA001042 | XP_006655702.1 callose synthase 10                                                        |
| TCONS_00036595 | -0.427549 | -2.13552   | -1.74577   | BGIOSGA036712 | XP_006663775.2 protein DETOXIFICATION 21-like isoform X1                                  |
| TCONS_00021493 | -0.42742  | -0.314687  | -0.621447  | BGIOSGA037907 | XP_006655722.1 PREDICTED: uncharacterized protein LOC102708063 isoform X1                 |
| TCONS_00037416 | -0.4273   | -1.0299    | -0.471918  | BGIOSGA032254 | XP_015698733.1 PREDICTED: uncharacterized protein LOC102707360                            |
| TCONS_00000703 | -0.427251 | 0.923419   | -0.365645  | BGIOSGA017876 | XP_002455489.1 probable WRKY transcription factor 47 isoform X1                           |
| TCONS_00012390 | -0.427247 | -0.326841  | 0.277277   | BGIOSGA037065 | XP_006650163.1 serine carboxypeptidase-like 51                                            |
| TCONS_00001133 | -0.427244 | -0.645064  | -0.29612   | BGIOSGA016821 | XP_021310739.1 NAD(P)-specific glutamate dehydrogenase isoform X4                         |
| TCONS_00015453 | -0.427096 | 0.605284   | -0.17753   | BGIOSGA011835 | XP_006653199.1 ABC transporter C family member 4-like                                     |
| TCONS_00003966 | -0.427066 | 0.268017   | -0.118788  | BGIOSGA001224 | XP_002458145.1 uncharacterized protein LOC8054370                                         |
| TCONS_00017512 | -0.426986 | 0.228946   | -1.01625   | BGIOSGA001474 | XP_021317352.1 disease resistance protein RGA2                                            |
| TCONS_00001250 | -0.426877 | -2.50041   | -2.81792   | BGIOSGA023186 | XP_006644328.1 aldehyde dehydrogenase family 2 member C4-like                             |
| TCONS_00003849 | -0.426774 | -1.36036   | -0.351403  | BGIOSGA001365 | XP_015699230.1 glyoxylate/succinic semialdehyde reductase 2, chloroplastic                |
| TCONS_00005360 | -0.426713 | -0.806951  | -0.592549  | BGIOSGA005715 | XP_006646841.1 phosphatidylinositol/phosphatidylcholine transfer protein SFH8-like        |
| TCONS_00031185 | -0.426674 | 0.214434   | 0.158064   | BGIOSGA013366 | XP_006661790.1 beta-glucuronosyltransferase GlcAT14A-like                                 |
| TCONS_00032787 | -0.425985 | -0.0644566 | -0.441453  | BGIOSGA031323 | XP_006651970.1 PREDICTED: uncharacterized protein LOC102715103                            |
| TCONS_00033578 | -0.425707 | 0.317743   | -0.396415  | BGIOSGA033889 | XP_006663488.2 PREDICTED: uncharacterized protein LOC102705674                            |
| TCONS_00024160 | -0.425606 | -0.0945747 | -0.925495  | BGIOSGA026197 | XP_004958420.1 dnaJ homolog subfamily C member 16                                         |
| TCONS_00011178 | -0.42545  | -0.787131  | -0.315447  | BGIOSGA004226 | XP_006651936.1 PREDICTED: uncharacterized protein LOC102704790                            |
| TCONS_00025581 | -0.425113 | 0.794248   | 0.658251   | BGIOSGA018806 | XP_003569731.1 H/ACA ribonucleoprotein complex subunit 4                                  |
| TCONS_00031249 | -0.424886 | -0.484417  | 0.239179   | BGIOSGA007330 | XP_006661824.1 protein ENHANCED DISEASE RESISTANCE 2-like isoform X1                      |
| TCONS_00022947 | -0.424835 | -2.06882   | -2.02931   | BGIOSGA035794 | XP_004966531.1 phytoene synthase, chloroplastic                                           |
| TCONS_00004198 | -0.424709 | -0.774899  | -0.20165   | BGIOSGA001004 | XP_006644556.1 IST1-like protein                                                          |
| TCONS_00022960 | -0.424612 | -0.68122   | -0.40729   | BGIOSGA024995 | XP_015694499.1 putative pentatricopeptide repeat-containing protein At1g74580             |
| TCONS_00008286 | -0.424571 | 0.623882   | 0.117612   | BGIOSGA014901 | XP_003575257.1 160S ribosomal protein L6-3                                                |
| TCONS_00023189 | -0.424491 | -0.532971  | -0.796375  | BGIOSGA011412 | XP_003557517.1 uncharacterized protein LOC100844809                                       |
| TCONS_00036234 | -0.424488 | 0.39857    | -1.09536   | BGIOSGA037593 | XP_006664642.1 pentatricopeptide repeat-containing protein At2g31400, chloroplastic       |
| TCONS_00009446 | -0.424478 | -0.428463  | -0.563016  | BGIOSGA008626 | XP_006649514.1 phytoene dehydrogenase, chloroplastic/chromoplastic                        |
| TCONS_00016971 | -0.424261 | -0.139177  | 0.0827345  | BGIOSGA005248 | XP_006654902.1 PREDICTED: uncharacterized protein LOC102708898                            |
| TCONS_00027777 | -0.42411  | -2.54783   | -3.11017   | BGIOSGA017615 | XP_004971901.1 uncharacterized protein LOC101779376                                       |
| TCONS_00016198 | -0.424045 | -0.30548   | -0.285907  | BGIOSGA027460 | XP_004976135.1 140S ribosomal protein S11                                                 |
| TCONS_00033273 | -0.424039 | -1.3485    | -1.78774   | BGIOSGA004786 | XP_006662908.2 tetrapyrrole-binding protein, chloroplastic                                |
| TCONS_00008518 | -0.424009 | -0.333866  | -0.130859  | BGIOSGA005910 | XP_006648902.1 ceramide kinase                                                            |
| TCONS_00027797 | -0.423834 | -3.64717   | -0.68251   | BGIOSGA028891 | XP_006659292.1 fasciclin-like arabinogalactan protein 2                                   |
| TCONS_00000471 | -0.423471 | 0.0686828  | 0.185254   | BGIOSGA029994 | XP_003565871.1 probable chlorophyll(ide) b reductase NYC1, chloroplastic                  |
| TCONS_00018578 | -0.423309 | -1.19523   | -3.18529   | BGIOSGA018857 | XP_015693136.1 kinesin-1 heavy chain-like                                                 |
| TCONS_00029285 | -0.423122 | 0.715769   | 0.709511   | BGIOSGA031028 | XP_004957252.1 1KH domain-containing protein HEN4                                         |
| TCONS_00027171 | -0.423097 | 1.03606    | -1.52771   | #N/A          | #N/A                                                                                      |
| TCONS_00000375 | -0.423036 | -0.466479  | -0.302491  | BGIOSGA002950 | XP_015691748.1 phosphoribosylaminoimidazole carboxylase, chloroplastic                    |
| TCONS_00009125 | -0.422881 | -0.547149  | -0.692598  | BGIOSGA031409 | XP_006649224.1 cell number regulator 6                                                    |

## transcriptome

|                |           |            |           |               |                                                                                                       |
|----------------|-----------|------------|-----------|---------------|-------------------------------------------------------------------------------------------------------|
| TCONS_00024276 | -0.422853 | -1.26619   | -1.05714  | BGIOSGA026322 | XP_006658069.1 adenosine deaminase-like protein                                                       |
| TCONS_00028285 | -0.422642 | 1.0911     | 0.134981  | BGIOSGA034947 | XP_006659574.1PREDICTED: uncharacterized protein LOC102709670                                         |
| TCONS_00033086 | -0.422405 | 0.410977   | -1.66975  | BGIOSGA031464 | XP_003577768.1short-chain dehydrogenase TIC 32, chloroplastic                                         |
| TCONS_00025270 | -0.422186 | 0.467913   | -1.30826  | BGIOSGA025873 | XP_006658656.1 cysteine-rich receptor-like protein kinase 10                                          |
| TCONS_00012026 | -0.421907 | 0.409505   | -0.246669 | BGIOSGA018625 | XP_004984768.1ABC transporter B family member 6                                                       |
| TCONS_00004151 | -0.421858 | -1.17681   | -1.54931  | BGIOSGA028797 | XP_010930421.1 putative 12-oxophytodienoate reductase 4 isoform X4                                    |
| TCONS_00017101 | -0.421674 | #NA        | -0.531222 | BGIOSGA001865 | XP_010231745.1uncharacterized protein LOC104582761                                                    |
| TCONS_00031386 | -0.421616 | -0.362641  | 0.338177  | BGIOSGA031632 | XP_006661902.1 KH domain-containing protein At4g18375-like                                            |
| TCONS_00003932 | -0.421401 | 0.0207331  | -0.174432 | BGIOSGA000883 | XP_004969232.1cytochrome P450 CYP72A219                                                               |
| TCONS_00030286 | -0.421231 | -1.36287   | 0.335195  | BGIOSGA002409 | XP_021319375.1ubiquitin recognition factor in ER-associated degradation protein 1-like                |
| TCONS_00017654 | -0.421207 | -1.1808    | -2.86857  | BGIOSGA005107 | XP_006655238.1 beta-glucosidase 19-like                                                               |
| TCONS_00016050 | -0.420923 | 0.329834   | 0.432763  | BGIOSGA029454 | XP_006653501.1PREDICTED: uncharacterized protein LOC102700798 isoform X4                              |
| TCONS_00035530 | -0.420862 | -0.57278   | -0.592367 | BGIOSGA001923 | XP_015698006.1 hydroxymethylglutaryl-CoA lyase, mitochondrial-like                                    |
| TCONS_00002116 | -0.420366 | 0.265839   | -2.27145  | BGIOSGA001560 | XP_004970463.1uncharacterized protein LOC101765839                                                    |
| TCONS_00012539 | -0.420243 | -0.464535  | -0.535844 | BGIOSGA010444 | XP_006651539.1PREDICTED: uncharacterized protein LOC102709548 isoform X2                              |
| TCONS_00019884 | -0.420067 | 1.96916    | 0.443357  | BGIOSGA002090 | XP_006654847.1 late embryogenesis abundant protein Lea14-A-like                                       |
| TCONS_00034576 | -0.419932 | 0.456898   | -1.03122  | BGIOSGA014125 | XP_008678023.1probable sucrose-phosphate synthase 5                                                   |
| TCONS_00021597 | -0.419684 | 0.0335929  | -0.77755  | BGIOSGA035035 | XP_004964527.1coatomer subunit beta'-1                                                                |
| TCONS_00022765 | -0.419585 | -2.0739    | -1.84282  | BGIOSGA002704 | XP_015693719.1 probable alpha-glucosidase Os06g0675700                                                |
| TCONS_00022419 | -0.419548 | 0.35424    | 1.04843   | BGIOSGA034318 | XP_006663348.1 F-box/LRR-repeat protein At5g02910-like                                                |
| TCONS_00024129 | -0.41918  | 0.355026   | 0.114376  | BGIOSGA010606 | XP_004958354.140S ribosomal protein S6                                                                |
| TCONS_00018045 | -0.418948 | -0.155616  | 0.295788  | BGIOSGA020091 | XP_010231224.1putative disease resistance protein RGA3                                                |
| TCONS_00029640 | -0.418927 | -1.38058   | -3.06722  | BGIOSGA030180 | XP_010942234.1 zinc finger protein CONSTANS-LIKE 2-like                                               |
| TCONS_00021987 | -0.41858  | 0.0238036  | 0.343563  | BGIOSGA037876 | XP_006655969.1 microtubule-associated protein 70-3 isoform X1                                         |
| TCONS_00034119 | -0.4181   | 0.177015   | 0.0512437 | BGIOSGA036810 | XP_006663709.1 mRNA turnover protein 4 homolog                                                        |
| TCONS_00025342 | -0.417806 | -2.73104   | -1.81564  | BGIOSGA027663 | XP_006657833.1 organic cation/carnitine transporter 2-like                                            |
| TCONS_00037063 | -0.417715 | -4.95419   | -2.88243  | BGIOSGA021563 | XP_004973447.1acetylserotonin O-methyltransferase 2                                                   |
| TCONS_00003034 | -0.417651 | -1.25099   | -2.79947  | BGIOSGA020205 | XP_006643879.1 serine/threonine-protein kinase HT1-like                                               |
| TCONS_00032651 | -0.417539 | -0.477514  | -0.882897 | BGIOSGA021847 | XP_006662030.1 U-box domain-containing protein 33-like isoform X1                                     |
| TCONS_00016892 | -0.417088 | 0.246074   | 0.0428014 | BGIOSGA017340 | XP_006653870.1 anamorsin homolog 1                                                                    |
| TCONS_00032628 | -0.416655 | -0.385808  | 0.0411536 | #N/A          | #N/A                                                                                                  |
| TCONS_00014492 | -0.416366 | -0.599664  | 0.0672375 | BGIOSGA016653 | XP_015692260.1 U-box domain-containing protein 6-like                                                 |
| TCONS_00032807 | -0.416181 | 1.5728     | -0.062934 | BGIOSGA036849 | XP_006663706.1 clathrin heavy chain 1-like                                                            |
| TCONS_00013281 | -0.416167 | -0.620627  | -0.994759 | BGIOSGA024823 | XP_006650686.1 ferredoxin--NADP reductase, root isozyme, chloroplastic                                |
| TCONS_00024325 | -0.416164 | -0.48303   | 0.0285377 | BGIOSGA026368 | XP_015695255.1 probable histone-arginine methyltransferase CARM1 isoform X2                           |
| TCONS_00021643 | -0.415879 | -1.88688   | -1.79065  | BGIOSGA006045 | XP_010238726.1uncharacterized protein LOC100837604 isoform X2                                         |
| TCONS_00010177 | -0.415714 | -0.255507  | -0.354731 | BGIOSGA009256 | XP_006650134.1 polypyrimidine tract-binding protein homolog 1                                         |
| TCONS_00024628 | -0.415409 | 1.83523    | -0.546985 | #N/A          | #N/A                                                                                                  |
| TCONS_00026655 | -0.41517  | -1.85385   | -1.5177   | BGIOSGA026192 | XP_006659433.1 extracellular ribonuclease LE-like                                                     |
| TCONS_00034170 | -0.414935 | -2.85453   | -2.96166  | BGIOSGA036763 | XP_006663745.1 probable chalcone--flavonone isomerase 3 isoform X1                                    |
| TCONS_00004923 | -0.414794 | -0.0683854 | 0.349051  | BGIOSGA000298 | XP_015688115.1 vacuolar protein sorting-associated protein 53 A isoform X2                            |
| TCONS_00006174 | -0.414701 | -0.906445  | 0.773603  | BGIOSGA005411 | XP_006648681.1 adenylyltransferase and sulfurtransferase MOC53-2                                      |
| TCONS_00034844 | -0.414675 | -0.936953  | -0.356213 | BGIOSGA022395 | XP_008659242.1RNA polymerase II transcription factor B subunit 3                                      |
| TCONS_00025289 | -0.414635 | -0.107454  | 0.437247  | BGIOSGA020149 | XP_003562954.160S ribosomal protein L38                                                               |
| TCONS_00018684 | -0.414541 | 0.0269416  | -1.54918  | #N/A          | #N/A                                                                                                  |
| TCONS_00002954 | -0.414494 | -0.799036  | 0.472399  | BGIOSGA019301 | XP_006643825.1 serine/threonine protein phosphatase 2A 57 kDa regulatory subunit B' iota isoform-like |
| TCONS_00037617 | -0.414416 | -0.818316  | -0.712282 | BGIOSGA035749 | XP_006664256.1 sodium/hydrogen exchanger 8                                                            |
| TCONS_00024005 | -0.414404 | -0.552452  | -0.345806 | BGIOSGA010449 | XP_006658752.1 interferon-related developmental regulator 2-like                                      |
| TCONS_00035801 | -0.414264 | -1.19575   | -0.450348 | BGIOSGA021914 | XP_006656635.1PREDICTED: uncharacterized protein LOC102718464                                         |
| TCONS_00001399 | -0.414125 | -0.139877  | -1.88129  | BGIOSGA001171 | XP_006646124.1 cytochrome P450 72A13-like isoform X2                                                  |
| TCONS_00007367 | -0.413926 | -0.0791633 | -0.848014 | BGIOSGA007108 | XP_006646900.1 tyrosine-sulfated glycopeptide receptor 1-like                                         |
| TCONS_00016621 | -0.413766 | -1.24434   | -1.46138  | BGIOSGA019492 | XP_006653769.1 probable LRR receptor-like serine/threonine-protein kinase At1g56140                   |



transcriptome

|                |           |            |             |               |                                                                                                     |
|----------------|-----------|------------|-------------|---------------|-----------------------------------------------------------------------------------------------------|
| TCONS_00022807 | -0.413727 | 1.48549    | 2.1492      | BGIOSGA030948 | XP_002438913.1EG45-like domain containing protein                                                   |
| TCONS_00022535 | -0.413479 | -1.38515   | -0.805916   | BGIOSGA035473 | XP_006656223.1 RNA polymerase II degradation factor 1-like                                          |
| TCONS_00004178 | -0.413085 | -0.47108   | -0.65448    | BGIOSGA020335 | XP_006644525.1 cytochrome b561 and DOMON domain-containing protein At3g61750-like                   |
| TCONS_00018277 | -0.412964 | -1.23781   | -0.678696   | BGIOSGA013026 | XP_015692696.1PREDICTED: uncharacterized protein LOC107304204                                       |
| TCONS_00005159 | -0.412912 | -0.449785  | 0.388721    | BGIOSGA000045 | XP_006646726.1 protein phosphatase 1 regulatory subunit SDS22                                       |
| TCONS_00025091 | -0.412791 | -0.869476  | -1.14763    | BGIOSGA016911 | XP_006657697.1 rop guanine nucleotide exchange factor 3-like                                        |
| TCONS_00032919 | -0.412721 | -1.97504   | -1.55378    | #N/A          | #N/A                                                                                                |
| TCONS_00026000 | -0.412484 | #NA        | #NA         | #N/A          | #N/A                                                                                                |
| TCONS_00013524 | -0.412252 | -0.3906    | 0.445024    | BGIOSGA024477 | XP_006650887.1PREDICTED: uncharacterized protein LOC102710858                                       |
| TCONS_00028675 | -0.412178 | -1.03153   | -0.347015   | BGIOSGA024808 | XP_006660492.1 DNA topoisomerase 6 subunit B                                                        |
| TCONS_00012174 | -0.411803 | -1.97607   | 0.0288398   | BGIOSGA009369 | XP_015689874.1 ABSCISIC ACID-INSENSITIVE 5-like protein 2                                           |
| TCONS_00007721 | -0.411748 | 0.0276037  | 0.305388    | BGIOSGA024435 | XP_015689619.1 spermine synthase-like                                                               |
| TCONS_00009037 | -0.411371 | 1.8308     | -0.557222   | BGIOSGA005370 | XP_006648103.1 exosome complex component CSL4                                                       |
| TCONS_00016560 | -0.411189 | -1.196     | -1.08609    | BGIOSGA020752 | XP_002448471.1 uncharacterized protein LOC8072288                                                   |
| TCONS_00015565 | -0.411161 | -0.861312  | 0.638642    | BGIOSGA038270 | XP_015691799.1 probable ribonuclease P/MRP protein subunit POP5 isoform X2                          |
| TCONS_00009740 | -0.410915 | -0.574959  | 0.673298    | BGIOSGA005958 | XP_006649807.1 LIM domain-containing protein WLIM2a                                                 |
| TCONS_00011033 | -0.410754 | 0.344679   | -1.55879    | BGIOSGA022508 | XP_002466388.1 uncharacterized protein LOC8084189                                                   |
| TCONS_00029902 | -0.410363 | -1.31422   | -0.663815   | BGIOSGA037670 | XP_004956654.1F-box/SPRY domain-containing protein 1                                                |
| TCONS_00028859 | -0.410361 | -1.97769   | #NA         | BGIOSGA015169 | XP_002460130.1 heavy metal-associated isoprenylated plant protein 23                                |
| TCONS_00027606 | -0.41035  | -0.590022  | -0.0810352  | BGIOSGA006448 | XP_021315203.1ankyrin repeat, PH and SEC7 domain containing protein secG                            |
| TCONS_00026262 | -0.409909 | -1.23553   | -0.409656   | BGIOSGA029172 | XP_006659262.1PREDICTED: uncharacterized protein LOC102709863                                       |
| TCONS_00009388 | -0.40962  | 0.828816   | 1.10131     | BGIOSGA027836 | XP_015690387.1 receptor homology region, transmembrane domain- and RING domain-containing protein 1 |
| TCONS_00007268 | -0.409496 | -0.344944  | -0.0438336  | BGIOSGA007215 | XP_015688437.1PREDICTED: uncharacterized protein LOC102713243                                       |
| TCONS_00025619 | -0.409444 | 0.0212581  | -0.562098   | BGIOSGA025803 | XP_003562563.1 probable protein phosphatase 2C 65 isoform X1                                        |
| TCONS_00011096 | -0.409347 | -0.732807  | -0.219904   | BGIOSGA009683 | XP_015690101.1 nuclear pore complex protein NUP1-like                                               |
| TCONS_00022126 | -0.409302 | -3.40997   | -1.91044    | BGIOSGA022767 | XP_004965303.1aspartyl protease family protein At5g10770                                            |
| TCONS_00011325 | -0.409197 | -1.15551   | 0.395729    | BGIOSGA013935 | XP_006665035.1 cyclin-dependent kinase F-3 isoform X2                                               |
| TCONS_00003045 | -0.409057 | -0.21672   | -0.246641   | BGIOSGA023075 | XP_006643882.2 aquaporin NIP1-2-like                                                                |
| TCONS_00011044 | -0.409038 | 0.0313484  | -0.751446   | BGIOSGA015066 | XP_015690199.1 kinesin-like protein KIF19 isoform X1                                                |
| TCONS_00001788 | -0.408941 | -0.853864  | -0.224908   | BGIOSGA017050 | XP_015691389.1 clathrin interactor EPSIN 1-like isoform X1                                          |
| TCONS_00009560 | -0.408857 | 0.534261   | -0.105102   | BGIOSGA032159 | XP_006649626.1 hornerin-like                                                                        |
| TCONS_00027858 | -0.408809 | 0.336956   | 0.517183    | BGIOSGA030071 | XP_006659346.1 enhancer of polycomb-like protein 1                                                  |
| TCONS_00025387 | -0.408706 | -0.376549  | -0.682512   | BGIOSGA024040 | XP_015695365.1 glutamyl-tRNA reductase-binding protein, chloroplastic                               |
| TCONS_00013580 | -0.408612 | -0.162399  | 0.258581    | BGIOSGA009395 | XP_006652051.2 ABC transporter G family member 3                                                    |
| TCONS_00012908 | -0.408547 | -0.200952  | -0.621915   | BGIOSGA037004 | XP_006664348.2PREDICTED: uncharacterized protein LOC102703742 isoform X1                            |
| TCONS_00001903 | -0.408322 | 0.803814   | -0.205044   | BGIOSGA004536 | XP_006646378.2 dymeclin                                                                             |
| TCONS_00006795 | -0.408303 | 0.479356   | 0.0199634   | BGIOSGA008968 | XP_004953778.1 basic leucine zipper 8                                                               |
| TCONS_00019916 | -0.408212 | 1.48531    | 0.162567    | BGIOSGA001439 | XP_002441637.1B2 protein isoform X1                                                                 |
| TCONS_00002302 | -0.407968 | -0.654822  | -0.498151   | BGIOSGA025413 | XP_006645141.1 KH domain-containing protein At1g09660/At1g09670-like                                |
| TCONS_00030180 | -0.407887 | -1.18639   | -0.728255   | BGIOSGA020761 | XP_015696385.1 ubiquitin carboxyl-terminal hydrolase 16-like                                        |
| TCONS_00006277 | -0.407857 | 0.189322   | -1.56613    | BGIOSGA034843 | XP_004952758.1 monooxygenase 1                                                                      |
| TCONS_00014153 | -0.407713 | 1.54279    | -0.566498   | #N/A          | #N/A                                                                                                |
| TCONS_00012290 | -0.407692 | -0.355561  | -0.00416172 | BGIOSGA026315 | XP_015689899.1 rho GTPase-activating protein 7-like                                                 |
| TCONS_00012183 | -0.407528 | 0.550124   | -0.471069   | BGIOSGA001895 | XP_003558003.1 phospholipid-transporting ATPase 1                                                   |
| TCONS_00014808 | -0.407487 | -0.905434  | -0.539289   | BGIOSGA016979 | XP_006652685.2 BTB/POZ domain-containing protein At1g63850                                          |
| TCONS_00019296 | -0.407253 | -0.0296811 | -0.120259   | BGIOSGA025386 | XP_006654405.2 probable mediator of RNA polymerase II transcription subunit 26b                     |
| TCONS_00028292 | -0.407122 | -0.289995  | 0.0520362   | BGIOSGA007052 | XP_015696036.1 AT-hook motif nuclear-localized protein 10                                           |
| TCONS_00036103 | -0.406902 | -1.98174   | 0.431444    | #N/A          | #N/A                                                                                                |
| TCONS_00000128 | -0.406669 | -1.29851   | -1.82962    | BGIOSGA002700 | XP_006643697.1 extended synaptotagmin-1                                                             |
| TCONS_00030737 | -0.40665  | -1.69826   | -3.09276    | BGIOSGA007410 | XP_006661641.1 peptidyl-prolyl cis-trans isomerase                                                  |
| TCONS_00037124 | -0.40665  | -0.74104   | -0.941165   | BGIOSGA036247 | NP_001148486.1 DNA binding protein                                                                  |
| TCONS_00027659 | -0.406515 | -0.555639  | -0.209505   | BGIOSGA025018 | NP_001105685.1 cysteine proteinase 1 precursor                                                      |
| TCONS_00006250 | -0.406496 | -0.407018  | -0.320559   | BGIOSGA018968 | XP_006648726.1 uncharacterized zinc finger protein At4g06634                                        |

transcriptome

|                |           |            |             |               |                                                                                                        |
|----------------|-----------|------------|-------------|---------------|--------------------------------------------------------------------------------------------------------|
| TCONS_00027481 | -0.406316 | 0.54801    | 0.672315    | BGIOSGA027530 | XP_015695514.1 polyadenylation and cleavage factor homolog 4-like                                      |
| TCONS_00015180 | -0.406258 | -1.12743   | -0.491231   | BGIOSGA033427 | XP_006653885.1 RNA polymerase II transcription factor B subunit 2                                      |
| TCONS_00005925 | -0.406077 | 0.435809   | -0.515625   | BGIOSGA001979 | XP_014755520.1 oligosaccharyltransferase complex subunit ostc                                          |
| TCONS_00025884 | -0.405899 | -1.00524   | -0.833719   | BGIOSGA027956 | XP_006659098.1 polycomb group protein FIE2                                                             |
| TCONS_00020482 | -0.405826 | -2.98305   | -0.571276   | BGIOSGA012396 | XP_015690126.1 protein trichome birefringence-like 33                                                  |
| TCONS_00002922 | -0.405823 | -1.75328   | -1.23081    | BGIOSGA037652 | XP_006643812.2 protein NSP-INTERACTING KINASE 3 isoform X1                                             |
| TCONS_00015626 | -0.405819 | -1.08585   | -0.82792    | BGIOSGA002830 | XP_004975273.1 serine carboxypeptidase 1                                                               |
| TCONS_00016131 | -0.405646 | -0.287574  | -0.00449007 | BGIOSGA025510 | XP_006652431.1 serine/threonine protein phosphatase 2A 57 kDa regulatory subunit B' theta isoform-like |
| TCONS_00035142 | -0.4055   | -1.98344   | -0.987135   | BGIOSGA035536 | XP_006663027.1 probable calcium-binding protein CML45                                                  |
| TCONS_00008761 | -0.4055   | 1.79791    | -0.25017    | #N/A          | #N/A                                                                                                   |
| TCONS_00026422 | -0.405409 | -1.37242   | -0.794985   | BGIOSGA007471 | XP_018681243.1 phosphatidylinositol/phosphatidylcholine transfer protein SFH13-like isoform X2         |
| TCONS_00000308 | -0.405234 | -2.188     | -0.759259   | BGIOSGA002883 | XP_006645560.1 tudor domain-containing protein 3 isoform X2                                            |
| TCONS_00027846 | -0.405104 | 0.493693   | -0.431362   | BGIOSGA008340 | XP_004964325.1 cellulose synthase-like protein D2                                                      |
| TCONS_00015243 | -0.405098 | 0.370534   | 0.897841    | BGIOSGA016407 | XP_006664915.1 G-type lectin S-receptor-like serine/threonine-protein kinase At2g19130                 |
| TCONS_00023718 | -0.40499  | 0.716368   | -2.57338    | BGIOSGA029037 | XP_015694890.1 protein trichome birefringence-like 13                                                  |
| TCONS_00020046 | -0.404958 | -1.08078   | -1.91848    | BGIOSGA004722 | XP_006656592.1 probable E3 ubiquitin-protein ligase XBOS36                                             |
| TCONS_00007716 | -0.404786 | 0.0928921  | -0.279886   | BGIOSGA033517 | XP_006647123.1 serine/arginine-rich SC35-like splicing factor SCL30                                    |
| TCONS_00013631 | -0.404702 | #NA        | -1.57411    | BGIOSGA017399 | NP_001309935.1 uncharacterized protein LOC103641406                                                    |
| TCONS_00015142 | -0.404596 | -1.70358   | -1.37849    | BGIOSGA017322 | XP_006652983.1 actin-related protein 8                                                                 |
| TCONS_00020601 | -0.404469 | 0.309346   | -0.306572   | BGIOSGA031626 | XP_002453753.2 atherin isoform X1                                                                      |
| TCONS_00025177 | -0.403902 | -3.20987   | -3.97999    | BGIOSGA006807 | XP_006657749.1 anthocyanidin 3-O-glucosyltransferase 2-like                                            |
| TCONS_00036122 | -0.403788 | -0.0337692 | -1.97203    | BGIOSGA037479 | XP_015698607.1 PREDICTED: uncharacterized protein LOC107305435                                         |
| TCONS_00026746 | -0.403669 | 0.353087   | 0.545276    | BGIOSGA033400 | XP_006660191.2 RING-H2 zinc finger protein RHA4a-like                                                  |
| TCONS_00035613 | -0.403669 | 0.934851   | -1.21414    | BGIOSGA037350 | XP_006664354.2 putative HVA22-like protein g                                                           |
| TCONS_00035960 | -0.403361 | -0.401137  | -0.355097   | BGIOSGA023949 | XP_006663984.1 probable histone H2A.1                                                                  |
| TCONS_00003497 | -0.403249 | -0.586183  | -0.677427   | BGIOSGA001705 | XP_015699317.1 glycine-rich domain-containing protein 1                                                |
| TCONS_00002213 | -0.403069 | 0.335462   | 0.0998484   | BGIOSGA000155 | XP_022682596.1 proline-rich receptor-like protein kinase PERK9 isoform X1                              |
| TCONS_00031313 | -0.402929 | -0.664715  | -0.993614   | BGIOSGA002127 | XP_012701221.1 GDSL esterase/lipase At5g62930 isoform X1                                               |
| TCONS_00016179 | -0.402929 | 0.150861   | 0.743352    | BGIOSGA022183 | XP_006652473.1 6,7-dimethyl-8-ribityllumazine synthase, chloroplastic                                  |
| TCONS_00015900 | -0.402793 | -1.12432   | -0.716423   | BGIOSGA005583 | XP_015691819.1 acetyltransferase At1g77540                                                             |
| TCONS_00012663 | -0.402695 | 0.620588   | 0.718497    | BGIOSGA032439 | XP_006651582.1 nucleolar protein 14                                                                    |
| TCONS_00003059 | -0.402594 | 0.235327   | 0.0835458   | #N/A          | #N/A                                                                                                   |
| TCONS_00006965 | -0.402526 | -0.835296  | -0.60745    | BGIOSGA016792 | XP_015688365.1 polyadenylate-binding protein-interacting protein 7-like                                |
| TCONS_00013974 | -0.402466 | -0.402265  | -0.772387   | BGIOSGA035287 | XP_006660481.1 cyclin-P4-1-like                                                                        |
| TCONS_00036551 | -0.402466 | 1.53633    | 2.27824     | BGIOSGA036904 | XP_003574085.1 pentatricopeptide repeat-containing protein At1g61870, mitochondrial                    |
| TCONS_00021816 | -0.402261 | 0.140006   | -0.436334   | BGIOSGA009113 | XP_015694146.1 PREDICTED: uncharacterized protein LOC102713003 isoform X1                              |
| TCONS_00002438 | -0.402042 | -0.909003  | -1.15834    | BGIOSGA032809 | XP_006645250.2 calmodulin-binding transcription activator 4-like isoform X1                            |
| TCONS_00008251 | -0.401957 | -0.412732  | -0.107184   | BGIOSGA014944 | XP_003575233.1 cellulose synthase-like protein D2                                                      |
| TCONS_00031403 | -0.40184  | -0.919881  | -1.06622    | BGIOSGA033215 | XP_003574132.1 trafficking protein particle complex subunit 13                                         |
| TCONS_00020596 | -0.40149  | -1.98846   | 0.195421    | BGIOSGA000053 | XP_015691456.1 putative UPF0496 protein 2                                                              |
| TCONS_00024070 | -0.40136  | -0.266866  | -0.0905351  | BGIOSGA026104 | XP_006657944.1 acidic leucine-rich nuclear phosphoprotein 32-related protein 1                         |
| TCONS_00004653 | -0.40133  | -1.48416   | -1.50294    | BGIOSGA020039 | XP_015690280.1 protein RETICULATA-RELATED 5, chloroplastic-like                                        |
| TCONS_00023671 | -0.401046 | -0.0630253 | -1.5833     | BGIOSGA025695 | XP_010238379.2 zinc finger MYND domain-containing protein 15 isoform X1                                |
| TCONS_00029498 | -0.401039 | -0.765185  | -0.722519   | BGIOSGA027350 | XP_006660970.1 probable cyclic nucleotide-gated ion channel 17                                         |
| TCONS_00006130 | -0.400984 | 0.130908   | 0.906142    | BGIOSGA016276 | XP_006647273.1 PREDICTED: uncharacterized protein LOC102709990                                         |
| TCONS_00007775 | -0.400953 | -4.5741    | -0.361139   | BGIOSGA029664 | XP_002440001.1 cytochrome P450 98A1                                                                    |
| TCONS_00016147 | -0.400772 | 1.06952    | 0.918518    | BGIOSGA014828 | XP_006652443.1 ribosome-recycling factor                                                               |
| TCONS_00008673 | -0.400504 | -0.353566  | -0.00887261 | BGIOSGA005757 | XP_015689270.1 protein CROWDED NUCLEI 1-like                                                           |
| TCONS_00032866 | -0.400434 | -1.40484   | 0.322063    | BGIOSGA036891 | XP_004977391.1 methyltransferase 17                                                                    |
| TCONS_00017018 | -0.399629 | -0.990817  | -0.00187413 | BGIOSGA019065 | XP_006654927.1 nudix hydrolase 9                                                                       |
| TCONS_00010282 | -0.399614 | 0.316345   | 1.02415     | BGIOSGA023912 | XP_006651490.1 transcription initiation factor TFIID subunit 9                                         |
| TCONS_00006841 | -0.399602 | -1.75926   | -2.00379    | BGIOSGA018887 | XP_006647861.1 endoglucanase 7                                                                         |
| TCONS_00002454 | -0.399499 | -0.575943  | -0.587159   | BGIOSGA004136 | XP_006645271.2 inactive leucine-rich repeat receptor-like protein kinase CORYNE                        |
| TCONS_00005700 | -0.399436 | -0.99106   | -3.17228    | BGIOSGA001283 | XP_003571132.1 inorganic pyrophosphatase 2                                                             |
| TCONS_00015464 | -0.399343 | 0.511323   | 0.149419    | BGIOSGA015555 | XP_006652118.2 PREDICTED: uncharacterized protein LOC102702648                                         |

## transcriptome

|                |           |            |             |               |                                                                                         |
|----------------|-----------|------------|-------------|---------------|-----------------------------------------------------------------------------------------|
| TCONS_00008969 | -0.399283 | -1.25429   | -1.17266    | BGIOSGA001234 | XP_006648051.1 protein ABHD17B                                                          |
| TCONS_00017391 | -0.399253 | -0.832862  | 0.388417    | BGIOSGA010719 | XP_002440840.1E3 ubiquitin-protein ligase SINAT5                                        |
| TCONS_00022217 | -0.399253 | -0.0244578 | 0.0402596   | BGIOSGA021281 | XP_006656065.2 uncharacterized exonuclease domain-containing protein At3g15140          |
| TCONS_00017811 | -0.398997 | 0.491001   | 0.194357    | BGIOSGA026556 | XP_003568448.1 putative disease resistance protein RGA1                                 |
| TCONS_00022842 | -0.398897 | 0.349033   | -1.00043    | BGIOSGA009449 | XP_015694104.1 DNA-directed RNA polymerases II, IV and V subunit 8B-like                |
| TCONS_00001586 | -0.398809 | -0.184497  | -0.418952   | BGIOSGA002203 | XP_006646212.1 transcription repressor MYB6-like                                        |
| TCONS_00028245 | -0.398681 | -0.58602   | -1.66319    | BGIOSGA035813 | XP_012702094.1 uncharacterized protein LOC101753989                                     |
| TCONS_00026171 | -0.398607 | -0.981218  | 0.267094    | BGIOSGA016633 | XP_006653543.1 PREDICTED: uncharacterized protein LOC102713626, partial                 |
| TCONS_00005034 | -0.398583 | -0.992137  | 0.28503     | BGIOSGA016484 | XP_003562968.2 beta-amylase isoform X1                                                  |
| TCONS_00003782 | -0.398535 | -1.67027   | -0.00459581 | BGIOSGA001430 | XP_006644276.1 PREDICTED: uncharacterized protein LOC102706509 isoform X1               |
| TCONS_00025345 | -0.398441 | -0.226781  | 0.547712    | BGIOSGA024085 | XP_015695051.1 PREDICTED: uncharacterized protein LOC102718855                          |
| TCONS_00003684 | -0.39835  | 0.814924   | 0.146947    | BGIOSGA001519 | XP_006644233.1 F-box/kelch-repeat protein At5g43190-like                                |
| TCONS_00002635 | -0.39835  | -0.43989   | -0.0374772  | BGIOSGA021559 | NP_001147221.1 plant-specific domain TIGR01615 family protein                           |
| TCONS_00011105 | -0.39824  | -0.1181    | -1.59029    | BGIOSGA004547 | XP_024317267.1 probable carboxylesterase 15 isoform X2                                  |
| TCONS_00013866 | -0.398197 | -0.992624  | -0.590399   | BGIOSGA038704 | XP_014661014.1 probable long-chain-alcohol O-fatty-acyltransferase 1                    |
| TCONS_00037118 | -0.398175 | 0.180186   | -0.441074   | BGIOSGA017113 | XP_010237281.1 probable signal peptidase complex subunit 1                              |
| TCONS_00003819 | -0.397853 | 0.289364   | 0.911948    | BGIOSGA021953 | XP_006646014.2 protein EARLY FLOWERING 3-like                                           |
| TCONS_00037122 | -0.397799 | #NA        | -5.05082    | BGIOSGA014665 | XP_006654645.1 O-methyltransferase ZRP4-like                                            |
| TCONS_00032562 | -0.397781 | 0.0068521  | -0.591431   | BGIOSGA016434 | XP_004982611.1 probable receptor-like protein kinase At4g10390                          |
| TCONS_00033480 | -0.397744 | -0.955719  | -0.591522   | BGIOSGA035274 | XP_015697666.1 alpha-ketoglutarate-dependent dioxygenase alkB                           |
| TCONS_00012960 | -0.397742 | 0.337058   | -0.196374   | BGIOSGA008396 | XP_015690727.1 myosin-17-like                                                           |
| TCONS_00020497 | -0.397708 | 1.32869    | 0.215743    | BGIOSGA022669 | XP_004965202.1 uncharacterized protein LOC101760541                                     |
| TCONS_00016631 | -0.397655 | 0.109787   | -0.0247032  | BGIOSGA019500 | XP_006652835.1 putative serine/threonine-protein kinase                                 |
| TCONS_00011996 | -0.39762  | 0.474996   | -0.120525   | BGIOSGA014627 | XP_006649840.1 protein kinase APK1B, chloroplastic-like isoform X1                      |
| TCONS_00027372 | -0.397568 | -0.713307  | 0.848614    | BGIOSGA027629 | XP_015695820.1 meiotic recombination protein SPO11-2 isoform X2                         |
| TCONS_00017176 | -0.397485 | -1.99352   | -2.59217    | BGIOSGA018602 | XP_015692487.1 gibberellin 2-beta-dioxygenase 6-like                                    |
| TCONS_00004177 | -0.397485 | -0.0083177 | -0.288012   | BGIOSGA028720 | XP_003569564.1 serine/arginine repetitive matrix protein 1                              |
| TCONS_00030038 | -0.397468 | -0.119072  | 0.373028    | BGIOSGA029770 | XP_006660620.1 activating signal cointegrator 1                                         |
| TCONS_00032638 | -0.397436 | #NA        | -0.422362   | BGIOSGA036535 | XP_015697066.1 transcription factor bHLH93-like                                         |
| TCONS_00023457 | -0.397414 | -1.05736   | -0.919299   | BGIOSGA032077 | XP_006657608.1 PREDICTED: uncharacterized protein LOC102705544 isoform X2               |
| TCONS_00006415 | -0.39734  | -0.363652  | -0.126859   | BGIOSGA004987 | XP_006647485.1 CMP-sialic acid transporter 5                                            |
| TCONS_00030426 | -0.397325 | 3.01751    | 1.45183     | BGIOSGA013750 | XP_015696435.1 probable receptor-like protein kinase At5g47070                          |
| TCONS_00005189 | -0.397089 | -1.84202   | -1.30364    | BGIOSGA002861 | XP_015696335.1 probable serine/threonine-protein kinase NAK                             |
| TCONS_00026333 | -0.396988 | -0.865254  | -0.236572   | BGIOSGA028414 | XP_004978471.1 triphosphate tunnel metalloenzyme 3                                      |
| TCONS_00026619 | -0.396946 | -1.11191   | -0.759182   | BGIOSGA030677 | XP_006659403.1 PREDICTED: uncharacterized protein LOC102706958                          |
| TCONS_00020976 | -0.396811 | -1.2574    | -2.59383    | BGIOSGA023198 | XP_003560615.2 uncharacterized protein LOC100839355                                     |
| TCONS_00009363 | -0.396799 | 0.994301   | 0.428504    | BGIOSGA001322 | XP_006651063.1 protein jagged-1-like isoform X1                                         |
| TCONS_00011567 | -0.396643 | 0.207055   | -0.456745   | BGIOSGA036001 | XP_022679297.1 capping protein, Arp2/3 and myosin-I linker protein 3                    |
| TCONS_00032783 | -0.39662  | -1.12014   | -1.85734    | BGIOSGA011778 | XP_006662642.2 4-coumarate-CoA ligase-like 2                                            |
| TCONS_00029082 | -0.396585 | -0.80774   | -2.41056    | BGIOSGA001663 | XP_003578168.1 respiratory burst oxidase homolog protein E                              |
| TCONS_00033407 | -0.396553 | -0.879215  | -2.59447    | BGIOSGA020673 | XP_004970253.1 protein RICE SALT SENSITIVE 3 isoform X1                                 |
| TCONS_00023001 | -0.396531 | -3.14672   | -1.16157    | BGIOSGA025034 | XP_006658217.1 flavin-containing monooxygenase FMO GS-OX-like 8                         |
| TCONS_00012005 | -0.396523 | -0.918201  | 0.0554176   | BGIOSGA011004 | XP_006651251.1 beta-glucuronosyltransferase GlcAT14A-like                               |
| TCONS_00018664 | -0.396236 | -2.3736    | -0.540809   | BGIOSGA031478 | XP_015692730.1 serine carboxypeptidase-like 33                                          |
| TCONS_00030317 | -0.396116 | -0.509815  | -0.91748    | BGIOSGA028353 | XP_015696666.1 probable glucan endo-1,3-beta-glucosidase A6                             |
| TCONS_00009496 | -0.395898 | 1.86247    | -2.18105    | BGIOSGA028895 | XP_006649564.1 polyol transporter 5-like                                                |
| TCONS_00034862 | -0.395711 | -0.051246  | -0.55629    | BGIOSGA033995 | XP_010237729.1O-fucosyltransferase 1                                                    |
| TCONS_00016953 | -0.395641 | -0.410876  | 0.277744    | BGIOSGA021227 | XP_006653941.1 formin-like protein 14                                                   |
| TCONS_00005973 | -0.395574 | -0.0445779 | -0.680219   | BGIOSGA002503 | XP_015698872.1 protein O-linked-mannose beta-1,4-N-acetylglucosaminyltransferase 2-like |
| TCONS_00012272 | -0.395561 | 0.735865   | 0.98374     | BGIOSGA010732 | XP_006650080.1 probable nucleolar protein 5-2                                           |
| TCONS_00030361 | -0.395548 | 0.103581   | 0.502581    | BGIOSGA005021 | XP_006661435.1 3beta-hydroxysteroid-dehydrogenase/decarboxylase isoform 2               |
| TCONS_00025691 | -0.395491 | -1.20796   | -0.517308   | BGIOSGA023732 | XP_006658107.1 probable E3 ubiquitin-protein ligase BAH1-like 1                         |

transcriptome

|                |           |            |            |               |                                                                                    |
|----------------|-----------|------------|------------|---------------|------------------------------------------------------------------------------------|
| TCONS_00019805 | -0.395455 | 0.849757   | 0.312302   | BGIOSGA017550 | XP_010231016.1eukaryotic translation initiation factor 3 subunit D                 |
| TCONS_00011851 | -0.395455 | -1.73304   | -0.164226  | BGIOSGA033506 | XP_006649697.1 protein NRT1/ PTR FAMILY 8.3-like                                   |
| TCONS_00013299 | -0.395401 | 0.588823   | 0.26662    | BGIOSGA013696 | XP_015690101.1 nuclear pore complex protein NUP1-like                              |
| TCONS_00037607 | -0.395378 | -1.78972   | -1.29782   | BGIOSGA017996 | XP_006664784.2 protein NRT1/ PTR FAMILY 2.11-like                                  |
| TCONS_00020593 | -0.395343 | -0.130229  | 0.0333059  | BGIOSGA002129 | XP_003563908.3mannan endo-1,4-beta-mannosidase 6                                   |
| TCONS_00007225 | -0.395326 | 0.00376686 | -2.81989   | BGIOSGA032365 | XP_006646775.1 wall-associated receptor kinase 2-like                              |
| TCONS_00016127 | -0.395245 | 0.536699   | 0.615291   | BGIOSGA014849 | XP_006653536.1 kelch domain-containing protein 4                                   |
| TCONS_00036892 | -0.395114 | -0.286007  | 0.586398   | BGIOSGA036428 | XP_015698840.1 protein CARMIL isoform X1                                           |
| TCONS_00013440 | -0.394879 | -0.826869  | -1.83307   | BGIOSGA011074 | NP_001147835.2lectin-like receptor kinase 7 precursor                              |
| TCONS_00037010 | -0.394644 | -1.71078   | -2.00254   | BGIOSGA028008 | XP_015698269.1 oxysterol-binding protein-related protein 1D-like                   |
| TCONS_00006964 | -0.394624 | -0.774721  | -0.52123   | #N/A          | XP_015689588.1PREDICTED: uncharacterized protein LOC102711129 isoform X3           |
| TCONS_00033200 | -0.394573 | -0.0429819 | -0.692468  | BGIOSGA034264 | XP_021317317.1disease resistance protein RPM1                                      |
| TCONS_00004144 | -0.394512 | 1.15405    | 0.0399012  | BGIOSGA036689 | XP_006644498.1 putative receptor protein kinase ZmPK1                              |
| TCONS_00027060 | -0.394495 | 0.0529407  | 0.285253   | BGIOSGA029110 | XP_004974083.1sorbitol dehydrogenase                                               |
| TCONS_00023527 | -0.394297 | -1.19017   | -1.48456   | BGIOSGA025560 | XP_002459755.2poly [ADP-ribose] polymerase 1                                       |
| TCONS_00030764 | -0.394234 | -0.269682  | -1.51273   | BGIOSGA034259 | XP_015698934.1 disease resistance protein RPM1-like                                |
| TCONS_00014161 | -0.393788 | 0.272746   | 0.0605694  | BGIOSGA002822 | NP_001105561.1cytochrome b-c1 complex subunit Rieske, mitochondrial precursor      |
| TCONS_00020871 | -0.393725 | -0.0623706 | 0.0582157  | BGIOSGA024975 | XP_012701148.2kinesin-like protein KIN-14M isoform X1                              |
| TCONS_00012953 | -0.393603 | -1.01807   | -0.973173  | BGIOSGA010036 | XP_010231508.1GATA transcription factor 18 isoform X1                              |
| TCONS_00025188 | -0.393203 | 1.19004    | -0.594109  | BGIOSGA025793 | XP_021308049.1ATP synthase subunit gamma, chloroplastic                            |
| TCONS_00003542 | -0.392992 | -1.22567   | 0.0172986  | BGIOSGA030829 | XP_006644164.1 respiratory burst oxidase homolog protein B                         |
| TCONS_00028945 | -0.392756 | -0.92808   | 0.0650124  | BGIOSGA017576 | XP_003578076.1protein EDS1L isoform X1                                             |
| TCONS_00006293 | -0.392387 | 0.628926   | -0.186917  | BGIOSGA021964 | XP_006648760.1PREDICTED: uncharacterized protein LOC102705507                      |
| TCONS_00019241 | -0.392321 | -1.49903   | -0.89934   | BGIOSGA002154 | XP_006655292.1 peptide-N4-(N-acetyl-beta-glucosaminyl)asparagine amidase A         |
| TCONS_00014277 | -0.392275 | 0.488915   | -0.262731  | BGIOSGA016432 | XP_006652294.1 40S ribosomal protein S10                                           |
| TCONS_00027714 | -0.391726 | -1.11615   | -0.103228  | BGIOSGA033572 | XP_015695750.1 succinate dehydrogenase assembly factor 1, mitochondrial isoform X2 |
| TCONS_00002149 | -0.391632 | 0.657616   | -1.60873   | BGIOSGA013862 | XP_006644992.1 scarecrow-like protein 9                                            |
| TCONS_00031099 | -0.391622 | -1.32281   | -1.22302   | BGIOSGA032920 | XP_015697374.1 acylamino-acid-releasing enzyme-like                                |
| TCONS_00035586 | -0.391458 | -0.492668  | -0.772122  | BGIOSGA016731 | XP_004978373.1sialyltransferase-like protein 2                                     |
| TCONS_00031388 | -0.391422 | -0.619823  | -0.0568851 | BGIOSGA017353 | XP_020408564.1uncharacterized protein LOC100284779 isoform X2                      |
| TCONS_00021449 | -0.391369 | -0.224706  | 0.053192   | BGIOSGA007340 | XP_006656547.1 protein transport protein SEC16B homolog                            |
| TCONS_00008740 | -0.391079 | -0.0223608 | -1.3471    | BGIOSGA005694 | XP_004953779.1serine protease SPPA, chloroplastic                                  |
| TCONS_00020398 | -0.390825 | -0.573266  | -0.0739055 | BGIOSGA000832 | XP_015688184.1 homeobox protein HOX1A isoform X2                                   |
| TCONS_00018100 | -0.39061  | 0.0440455  | -0.547343  | BGIOSGA000725 | XP_006654620.1 MATH domain-containing protein At5g43560-like                       |
| TCONS_00032626 | -0.390593 | -1.28565   | -0.735762  | BGIOSGA015052 | XP_002465010.1RING-H2 finger protein ATL80                                         |
| TCONS_00024607 | -0.39049  | 0.521426   | -0.0742443 | BGIOSGA011765 | XP_002461493.1calcium-dependent protein kinase 17                                  |
| TCONS_00018491 | -0.390236 | -1.01718   | 0.172757   | BGIOSGA018942 | XP_006654190.1PREDICTED: uncharacterized protein LOC102712167 isoform X1           |
| TCONS_00018847 | -0.390164 | 0.00194368 | -0.304361  | BGIOSGA012162 | XP_003568732.1proline-rich receptor-like protein kinase PERK1 isoform X1           |
| TCONS_00014703 | -0.389732 | 0.115934   | 0.349038   | BGIOSGA016877 | XP_006653644.1PREDICTED: uncharacterized protein At3g06530                         |
| TCONS_00018059 | -0.38949  | -1.86316   | -1.41544   | BGIOSGA005155 | XP_015692829.1 putative glucan endo-1,3-beta-glucosidase GVI                       |
| TCONS_00020630 | -0.38946  | -0.521577  | 0.0194785  | BGIOSGA022812 | XP_006656043.2 diacylglycerol O-acyltransferase 2                                  |
| TCONS_00016584 | -0.389056 | 0.256851   | 0.282773   | BGIOSGA028216 | XP_006652792.1 26S proteasome non-ATPase regulatory subunit 1 homolog A-like       |
| TCONS_00019415 | -0.388956 | -0.0793057 | -1.77919   | BGIOSGA019196 | XP_006654494.1 splicing factor 1                                                   |
| TCONS_00004613 | -0.388834 | 0.561061   | 0.659732   | BGIOSGA017960 | XP_006644895.1 F-box protein SKIP24 isoform X1                                     |
| TCONS_00011532 | -0.388819 | 0.366756   | 0.344331   | BGIOSGA032530 | XP_004985790.1putative aconitate hydratase, cytoplasmic                            |
| TCONS_00000049 | -0.388743 | -0.0274367 | -0.10743   | BGIOSGA002615 | XP_006661048.1 prolyl endopeptidase-like                                           |
| TCONS_00005515 | -0.388729 | -2.54061   | -1.90561   | BGIOSGA007624 | XP_006646940.1 glycine cleavage system H protein 2, mitochondrial-like             |
| TCONS_00000008 | -0.3886   | -0.712404  | -1.09182   | BGIOSGA022903 | XP_015699138.1 putative pentatricopeptide repeat-containing protein At2g01510      |
| TCONS_00006041 | -0.38854  | 0.581575   | -0.188559  | BGIOSGA016140 | XP_003574969.1importin beta-like SAD2                                              |
| TCONS_00011085 | -0.388194 | 1.35296    | -1.1364    | BGIOSGA017164 | XP_006650695.1 peroxisomal (S)-2-hydroxy-acid oxidase GLO1 isoform X1              |
| TCONS_00038038 | -0.387847 | -0.691783  | -0.215009  | BGIOSGA035211 | XP_006663976.1 serine hydroxymethyltransferase 4-like                              |
| TCONS_00002980 | -0.387768 | 0.121439   | -0.200286  | BGIOSGA002239 | XP_002455041.1phosducin-like protein 3                                             |
| TCONS_00012627 | -0.387696 | 0.0166258  | 0.147662   | BGIOSGA010346 | XP_006651575.1 paladin                                                             |

## transcriptome

|                |           |           |             |               |                                                                                                              |
|----------------|-----------|-----------|-------------|---------------|--------------------------------------------------------------------------------------------------------------|
| TCONS_00002511 | -0.387571 | 0.343634  | -0.207098   | BGIOSGA005146 | XP_021313101.1NAC domain-containing protein 48-like                                                          |
| TCONS_00034562 | -0.387362 | 0.252303  | 0.0178346   | BGIOSGA032568 | XP_022684857.1disease resistance protein RPM1                                                                |
| TCONS_00004340 | -0.387288 | -1.91836  | -3.06077    | BGIOSGA003137 | XP_006646291.1 pathogen-related protein                                                                      |
| TCONS_00008776 | -0.387255 | -0.237472 | -0.915462   | BGIOSGA007683 | XP_006649028.1 dynamin-2A-like                                                                               |
| TCONS_00021033 | -0.387189 | -0.882268 | 0.631783    | BGIOSGA006954 | XP_006656245.1 zinc finger A20 and AN1 domain-containing stress-associated protein 8                         |
| TCONS_00010893 | -0.386954 | 1.48123   | 0.0784274   | BGIOSGA026386 | XP_006650540.1 leishmanolysin homolog                                                                        |
| TCONS_00017704 | -0.386944 | -0.399299 | 0.190309    | BGIOSGA037065 | XP_003566307.1calmodulin binding protein PICBP                                                               |
| TCONS_00016180 | -0.38689  | 0.252427  | 0.719986    | BGIOSGA006070 | XP_006653562.1 la protein 1                                                                                  |
| TCONS_00019943 | -0.386731 | -0.446895 | -0.548178   | BGIOSGA007266 | XP_006656537.2PREDICTED: uncharacterized protein LOC102711075                                                |
| TCONS_00036166 | -0.386697 | -0.165639 | -0.614925   | BGIOSGA031717 | XP_015698810.1 conserved oligomeric Golgi complex subunit 8                                                  |
| TCONS_00021902 | -0.386492 | 0.632573  | 1.02988     | BGIOSGA001038 | XP_012701130.1spastin isoform X1                                                                             |
| TCONS_00003060 | -0.386475 | -1.90937  | -1.53209    | BGIOSGA017870 | XP_006643890.1 CBL-interacting protein kinase 5                                                              |
| TCONS_00030376 | -0.386463 | 0.0168343 | -0.489061   | BGIOSGA029422 | XP_006660855.2 probable sodium/metabolite cotransporter BASS5, chloroplastic                                 |
| TCONS_00033286 | -0.385911 | -4.01939  | -2.44434    | BGIOSGA019828 | XP_003573587.1endo-1,3;1,4-beta-D-glucanase isoform X1                                                       |
| TCONS_00019225 | -0.385901 | -1.31005  | -0.764651   | BGIOSGA018123 | XP_015693278.1 carbon catabolite repressor protein 4 homolog 4                                               |
| TCONS_00014178 | -0.385828 | 0.0389019 | -1.63815    | BGIOSGA016334 | XP_002446391.2acetyl-coenzyme A synthetase, chloroplastic/glyoxysomal                                        |
| TCONS_00032514 | -0.385174 | -0.900375 | 0.495861    | BGIOSGA031608 | XP_015697042.1 thylakoid lumenal 17.4 kDa protein, chloroplastic                                             |
| TCONS_00036740 | -0.384986 | -0.239072 | -0.0935242  | BGIOSGA025996 | XP_015698726.1 tubby-like F-box protein 14                                                                   |
| TCONS_00034390 | -0.384696 | 0.851087  | 0.387702    | BGIOSGA001884 | XP_006662772.1 coatomer subunit beta-1                                                                       |
| TCONS_00027633 | -0.384426 | -0.111256 | 0.178331    | BGIOSGA027384 | XP_006659241.1PREDICTED: uncharacterized protein LOC102703601                                                |
| TCONS_00036513 | -0.383984 | -0.297068 | 0.0801637   | BGIOSGA021528 | XP_006664255.1 microtubule-associated protein 70-1                                                           |
| TCONS_00035216 | -0.383819 | -1.44248  | -2.5098     | BGIOSGA033307 | XP_015697901.1 stress enhanced protein 1, chloroplastic-like isoform X1                                      |
| TCONS_00025357 | -0.38378  | 0.235531  | 0.202298    | BGIOSGA016128 | XP_015695302.1 probable protein phosphatase 2C 64                                                            |
| TCONS_00018611 | -0.383768 | 0.523496  | 1.32874     | BGIOSGA018823 | XP_004960466.1ribosome biogenesis protein NOP53                                                              |
| TCONS_00009720 | -0.383634 | 0.388954  | 0.119036    | BGIOSGA014480 | XP_015690363.1 partner of Y14 and mago isoform X2                                                            |
| TCONS_00010460 | -0.3836   | -1.95386  | -0.702054   | BGIOSGA019995 | XP_006650299.1PREDICTED: uncharacterized protein LOC102704686                                                |
| TCONS_00024306 | -0.383457 | 0.330302  | 0.0337762   | BGIOSGA006631 | XP_012699221.1probable serine/threonine-protein kinase At1g54610                                             |
| TCONS_00020049 | -0.383304 | -0.172898 | 0.188697    | BGIOSGA016954 | XP_006655742.1 SPX domain-containing membrane protein Os06g0129400 isoform X1                                |
| TCONS_00018071 | -0.383295 | -3.73469  | -2.66701    | BGIOSGA023014 | XP_006655455.1 peroxidase 1-like                                                                             |
| TCONS_00005788 | -0.383188 | -1.28064  | 0.241772    | BGIOSGA006847 | XP_006647127.1 abscisic acid receptor PYL8-like                                                              |
| TCONS_00014169 | -0.383101 | -0.856831 | -0.181865   | BGIOSGA007063 | XP_006652239.1 OTU domain-containing protein DDB_G0284757                                                    |
| TCONS_00016068 | -0.382792 | 0.832401  | -0.48102    | BGIOSGA001201 | XP_004975924.1probable amino acid permease 7 isoform X2                                                      |
| TCONS_00018295 | -0.382434 | 0.623157  | -0.359485   | BGIOSGA034862 | XP_006654779.1 tubby-like F-box protein 10                                                                   |
| TCONS_00018827 | -0.382361 | -1.55217  | 0.341764    | BGIOSGA002114 | XP_006654155.1PREDICTED: uncharacterized protein LOC102701914                                                |
| TCONS_00010720 | -0.382083 | -3.08008  | -2.70052    | BGIOSGA013344 | XP_015690018.1 magnesium transporter MRS2-A, chloroplastic                                                   |
| TCONS_00005984 | -0.381543 | -0.712027 | -0.25475    | BGIOSGA008116 | XP_006647236.1 cyclin-T1-2-like                                                                              |
| TCONS_00004086 | -0.381461 | 0.743581  | -0.00434889 | BGIOSGA001105 | XP_006658273.1PREDICTED: uncharacterized protein LOC102709386                                                |
| TCONS_00009760 | -0.380842 | -0.207193 | 0.274767    | BGIOSGA012308 | XP_006647280.2PREDICTED: uncharacterized protein At1g76660, partial                                          |
| TCONS_00005765 | -0.380754 | -1.16791  | 0.848668    | BGIOSGA022587 | XP_006657995.2 probable mannan synthase 7                                                                    |
| TCONS_00026720 | -0.380719 | 0.421504  | 0.126021    | BGIOSGA014038 | XP_006653070.1 cationic peroxidase SPC4-like                                                                 |
| TCONS_00028740 | -0.380697 | 0.92434   | -0.305918   | BGIOSGA036103 | XP_021906424.1 putative disease resistance protein At3g14460                                                 |
| TCONS_00019993 | -0.380685 | -1.33675  | 0.71805     | BGIOSGA022081 | XP_004964337.1F-box protein At2g26160 isoform X1                                                             |
| TCONS_00006110 | -0.3806   | -0.880885 | -1.43398    | BGIOSGA013604 | XP_015688603.1 isoflavone 2'-hydroxylase-like                                                                |
| TCONS_00017652 | -0.38058  | 0.745091  | -0.160708   | BGIOSGA008421 | XP_006654311.1 pentatricopeptide repeat-containing protein At1g10270-like                                    |
| TCONS_00009241 | -0.380487 | -0.20845  | 0.831721    | BGIOSGA014124 | XP_006649330.1 probable adenylate kinase 1, chloroplastic                                                    |
| TCONS_00006640 | -0.380436 | 0.189964  | 0.175372    | BGIOSGA016952 | XP_006647681.1 zinc finger CCCH domain-containing protein 17                                                 |
| TCONS_00034680 | -0.380429 | -1.77018  | -1.77642    | BGIOSGA004783 | XP_006663364.1 probable glutathione peroxidase 2                                                             |
| TCONS_00018973 | -0.379846 | -0.146423 | -0.303954   | BGIOSGA008318 | XP_006654212.1 peroxisome biogenesis protein 2                                                               |
| TCONS_00006743 | -0.379727 | 0.726083  | -0.172751   | BGIOSGA020304 | XP_006647789.1 thioredoxin reductase NTRB                                                                    |
| TCONS_00006643 | -0.379631 | 0.0421051 | -1.68934    | BGIOSGA024641 | XP_015689649.1 bifunctional dTDP-4-dehydrorhamnose 3,5-epimerase/dTDP-4-dehydrorhamnose reductase isoform X1 |
| TCONS_00010514 | -0.379451 | -0.890788 | 0.0481739   | BGIOSGA013124 | XP_006651602.2 calcium-transporting ATPase 2, plasma membrane-type-like                                      |
| TCONS_00005298 | -0.379104 | -1.21716  | -1.16218    | BGIOSGA005721 | XP_006646798.1 ubiquitin-conjugating enzyme E2 28-like                                                       |
| TCONS_00036411 | -0.379018 | -0.444753 | 0.492846    | BGIOSGA037777 | XP_015698704.1 protein RRNAD1                                                                                |
| TCONS_00015979 | -0.37869  | -1.39055  | -3.1066     | BGIOSGA015002 | XP_006653461.1 putative glutathione-specific gamma-glutamylcyclotransferase 2                                |

transcriptome

|                |           |            |             |               |                                                                                                                                                |
|----------------|-----------|------------|-------------|---------------|------------------------------------------------------------------------------------------------------------------------------------------------|
| TCONS_00031361 | -0.378663 | -0.721407  | -0.519612   | BGIOSGA037141 | XP_004982773.1probable protein arginine N-methyltransferase 6.2                                                                                |
| TCONS_00005585 | -0.378274 | -0.18218   | 0.56544     | BGIOSGA007693 | XP_015689617.1 DNA ligase 1                                                                                                                    |
| TCONS_00020496 | -0.378079 | -1.69442   | -1.57562    | BGIOSGA017849 | XP_015693542.1 aspartic proteinase Asp1-like<br>XP_015689854.1 omega-3 fatty acid desaturase, chloroplastic-like                               |
| TCONS_00012062 | -0.377928 | -2.65959   | -3.49194    | BGIOSGA024410 |                                                                                                                                                |
| TCONS_00004008 | -0.377804 | -0.402265  | 0.0380109   | BGIOSGA020455 | XP_006646118.1 probable protein ABIL1<br>XP_006662751.1 two-component response regulator-like APRR3                                            |
| TCONS_00033004 | -0.377496 | -0.823152  | 0.196219    | BGIOSGA029381 | XP_006650637.1PREDICTED: uncharacterized protein LOC102709259<br>XP_003580282.1O-fucosyltransferase 29 isoform X2                              |
| TCONS_00013219 | -0.377197 | -0.088835  | 0.417693    | BGIOSGA009768 |                                                                                                                                                |
| TCONS_00016375 | -0.376837 | -1.05534   | -0.489891   | BGIOSGA014547 | XP_004953528.1serine/threonine-protein kinase/endoribonuclease IRE1 isoform X1                                                                 |
| TCONS_00008625 | -0.376775 | -0.947141  | -0.989457   | BGIOSGA005799 | XP_006647636.2 peroxisome biogenesis protein 19-1-like                                                                                         |
| TCONS_00008531 | -0.376494 | 0.0896019  | 0.414056    | BGIOSGA005897 | NP_001141005.1lysine ketoglutarate reductase trans-splicing 1                                                                                  |
| TCONS_00018476 | -0.37649  | -0.115637  | -0.749076   | BGIOSGA038236 | XP_006645205.1 neuroguidin                                                                                                                     |
| TCONS_00004941 | -0.376321 | -0.0204833 | 1.0546      | BGIOSGA000280 | XP_006652095.1 polycomb group protein EMBRYONIC FLOWER 2-like isoform X1                                                                       |
| TCONS_00013711 | -0.37612  | -1.1351    | -0.14265    | BGIOSGA030026 | XP_006660402.2 ras GTPase-activating protein-binding protein 2                                                                                 |
| TCONS_00007295 | -0.376    | 0.670864   | 0.504198    | BGIOSGA007187 | XP_006661616.1 cation-chloride cotransporter 1 isoform X1                                                                                      |
| TCONS_00027809 | -0.375963 | 0.113667   | -0.4855     | BGIOSGA001806 |                                                                                                                                                |
| TCONS_00020102 | -0.375878 | -1.64075   | -0.76931    | BGIOSGA022283 | XP_006656627.1 carboxypeptidase SOL1<br>XP_015695371.1 protein FAR1-RELATED SEQUENCE 6-like isoform X1                                         |
| TCONS_00023709 | -0.375325 | -1.46437   | -0.310997   | BGIOSGA025749 |                                                                                                                                                |
| TCONS_00011145 | -0.375194 | -0.0825353 | 0.000871031 | #N/A          | #N/A                                                                                                                                           |
| TCONS_00035664 | -0.375029 | 0.847038   | 0.361045    | BGIOSGA031249 | XP_006664390.1 transmembrane 9 superfamily member 1-like                                                                                       |
| TCONS_00017037 | -0.374652 | -0.288449  | -0.79276    | BGIOSGA020997 | XP_006653991.1 tetraspanin-3<br>XP_015699165.1 protein farnesyltransferase subunit beta                                                        |
| TCONS_00004355 | -0.374422 | -0.980779  | 0.183539    | BGIOSGA009861 | XP_006647123.1 serine/arginine-rich SC35-like splicing factor SCL30                                                                            |
| TCONS_00037399 | -0.37417  | 0.656457   | 1.00066     | BGIOSGA033517 | XP_006662860.1 ankyrin repeat-containing protein At3g12360-like                                                                                |
| TCONS_00034622 | -0.374088 | -3.59816   | -1.69622    | BGIOSGA035074 | XP_015691471.1 U-box domain-containing protein 16-like                                                                                         |
| TCONS_00004646 | -0.373906 | -0.289731  | 0.528469    | BGIOSGA011273 | XP_015696817.1PREDICTED: uncharacterized protein LOC102718134, partial                                                                         |
| TCONS_00014357 | -0.373715 | 0.41923    | 0.841245    | BGIOSGA029032 | XP_006660121.1 probable trehalose-phosphate phosphatase 6                                                                                      |
| TCONS_00026584 | -0.373443 | -2.41647   | -3.38684    | BGIOSGA012770 | XP_015691360.1 thylakoid luminal 17.9 kDa protein, chloroplastic                                                                               |
| TCONS_00000013 | -0.373426 | 0.97285    | -0.693124   | BGIOSGA002584 | XP_006652152.1PREDICTED: uncharacterized protein LOC102717057                                                                                  |
| TCONS_00013877 | -0.373356 | -1.72488   | -0.247674   | BGIOSGA016056 | XP_006646776.1 60S ribosomal protein L37-1-like                                                                                                |
| TCONS_00005257 | -0.373313 | 0.110421   | -0.383581   | BGIOSGA009278 |                                                                                                                                                |
| TCONS_00024420 | -0.372982 | -1.60968   | -1.30013    | BGIOSGA010151 | XP_015695221.1 proline transporter 1<br>XP_006654597.2PREDICTED: uncharacterized protein LOC102715941, partial                                 |
| TCONS_00019571 | -0.372911 | -0.942273  | -1.12898    | BGIOSGA028119 | XP_006658006.1 pectin acetyltransferase 12-like isoform X1                                                                                     |
| TCONS_00024170 | -0.3728   | -3.12183   | -0.569001   | BGIOSGA017057 | XP_015696740.1 flowering time control protein FPA                                                                                              |
| TCONS_00030359 | -0.372787 | 0.601756   | 0.178096    | BGIOSGA004940 |                                                                                                                                                |
| TCONS_00004836 | -0.372731 | 0.349991   | 0.97333     | BGIOSGA019903 | XP_006645128.1 F-box protein SKP2A-like                                                                                                        |
| TCONS_00037558 | -0.372706 | -0.933106  | -0.0462298  | BGIOSGA035805 | XP_015698471.1 plant cysteine oxidase 2-like<br>XP_003574665.1trihelix transcription factor ASIL1                                              |
| TCONS_00026810 | -0.372689 | -0.599484  | -0.779475   | BGIOSGA028870 | XP_006645207.2 snRNA-activating protein complex subunit isoform X1                                                                             |
| TCONS_00002394 | -0.372524 | 0.0943172  | -0.411454   | BGIOSGA005030 | XP_006649896.1 protein disulfide isomerase-like 5-1                                                                                            |
| TCONS_00012057 | -0.372518 | -0.67625   | -0.255331   | BGIOSGA010951 |                                                                                                                                                |
| TCONS_00026197 | -0.372483 | -0.554903  | -0.0403372  | BGIOSGA034239 | XP_015696084.1 RNA polymerase sigma factor sigF, chloroplastic                                                                                 |
| TCONS_00028248 | -0.372481 | -0.538537  | 1.19502     | BGIOSGA026732 | XP_006659549.1 pre-mRNA-splicing factor CWC25 homolog<br>XP_015688980.1 alpha-1,6-mannosyl-glycoprotein 2-beta-N-acetylglucosaminyltransferase |
| TCONS_00007030 | -0.372419 | 0.718997   | -0.0589819  | BGIOSGA009212 | XP_012700357.2glycosyltransferase family protein 64 protein C5                                                                                 |
| TCONS_00018221 | -0.372249 | 0.221693   | 0.399376    | BGIOSGA013345 | XP_006645476.1 probable receptor-like protein kinase At1g67000                                                                                 |
| TCONS_00000152 | -0.372125 | 0.157947   | 0.556535    | BGIOSGA002732 | XP_006649657.1 protein VAC14 homolog isoform X2                                                                                                |
| TCONS_00011815 | -0.372048 | 0.0282075  | 0.281603    | BGIOSGA011195 | XP_015695305.1 probable receptor-like protein kinase At1g67000                                                                                 |
| TCONS_00002707 | -0.371919 | -1.45898   | -2.7659     | BGIOSGA002517 |                                                                                                                                                |
| TCONS_00013148 | -0.371677 | -0.589475  | -0.225902   | BGIOSGA031473 | XP_004981821.1magnesium transporter MRS2-1<br>XP_006408496.2 GPI ethanolamine phosphate transferase 1                                          |
| TCONS_00006337 | -0.371654 | -0.483562  | -0.476333   | BGIOSGA008500 | XP_012701107.1probable methyltransferase PMT9                                                                                                  |
| TCONS_00022805 | -0.371593 | -0.45867   | 0.168542    | BGIOSGA018156 |                                                                                                                                                |
| TCONS_00018759 | -0.371498 | -0.30959   | -0.060788   | BGIOSGA021040 | XP_015692753.1 stem 28 kDa glycoprotein-like<br>XP_015691946.1 DNA excision repair protein ERCC-8-like                                         |
| TCONS_00005907 | -0.371404 | -1.73117   | -0.0503738  | BGIOSGA004832 | XP_006657561.1 60S ribosomal protein L23A-like                                                                                                 |
| TCONS_00016192 | -0.371354 | 0.0415347  | -0.323583   | BGIOSGA015068 | XP_012702009.2probable 3-deoxy-D-manno-octulosonic acid transferase, mitochondrial                                                             |
| TCONS_00004754 | -0.371191 | -1.89494   | -0.816437   | BGIOSGA000461 |                                                                                                                                                |

transcriptome

|                |           |            |            |               |                                                                                     |
|----------------|-----------|------------|------------|---------------|-------------------------------------------------------------------------------------|
| TCONS_00021030 | -0.371136 | -0.346738  | -0.197925  | BGIOSGA016665 | XP_006656244.2 DNA-directed RNA polymerase I subunit 1                              |
| TCONS_00008751 | -0.371127 | 1.62021    | 0.671825   | BGIOSGA022668 | XP_015689245.1 aspartic proteinase Asp1-like                                        |
| TCONS_00026858 | -0.371052 | -1.52371   | -1.41929   | BGIOSGA027808 | XP_006659533.1 BTB/POZ domain-containing protein At1g55760                          |
| TCONS_00035617 | -0.370644 | -0.189926  | 0.760336   | BGIOSGA022378 | XP_006663840.1 protein FAR1-RELATED SEQUENCE 5-like                                 |
| TCONS_00027254 | -0.370432 | 1.73139    | 0.164916   | BGIOSGA030912 | XP_006659067.1 probable calcium-binding protein CML7                                |
| TCONS_00026645 | -0.370008 | 0.117261   | 0.0925232  | BGIOSGA030844 | XP_006660148.1 PREDICTED: uncharacterized protein LOC102702211, partial             |
| TCONS_00033801 | -0.370003 | 0.11211    | -0.365204  | BGIOSGA012517 | XP_006665135.1 histone-lysine N-methyltransferase, H3 lysine-9 specific SUVH3-like  |
| TCONS_00011739 | -0.369913 | 0.773994   | -0.0826276 | BGIOSGA011268 | XP_015690948.1 peptidyl-prolyl cis-trans isomerase CYP65                            |
| TCONS_00022160 | -0.369896 | -1.13652   | -0.0739978 | BGIOSGA008923 | XP_006656038.1 PREDICTED: uncharacterized protein LOC102706012                      |
| TCONS_00020575 | -0.369679 | 0.0542513  | -0.0652852 | BGIOSGA019348 | XP_006657621.1 RNA polymerase I termination factor isoform X1                       |
| TCONS_00029167 | -0.369679 | -1.07157   | -1.5057    | BGIOSGA034755 | XP_015696813.1 2-hydroxyisoflavanone dehydratase-like                               |
| TCONS_00004232 | -0.369622 | -0.606978  | -0.867286  | BGIOSGA000973 | XP_006644535.2 putative D-cysteine desulfhydrase 2, mitochondrial                   |
| TCONS_00009696 | -0.36945  | 0.365908   | 0.223658   | BGIOSGA020192 | XP_004984992.3 receptor-like serine/threonine-protein kinase At2g45590              |
| TCONS_00030339 | -0.369447 | 0.350014   | 0.0171129  | BGIOSGA026571 | XP_006660819.1 probable protein S-acyltransferase 7                                 |
| TCONS_00005578 | -0.36923  | 0.662909   | -0.867764  | BGIOSGA017000 | XP_006646990.1 ent-cassadiene C2-hydroxylase-like                                   |
| TCONS_00013264 | -0.36912  | -0.148733  | 0.251293   | BGIOSGA009723 | XP_015690835.1 protein FAR1-RELATED SEQUENCE 5-like                                 |
| TCONS_00024651 | -0.369081 | 0.663771   | 1.00649    | BGIOSGA015223 | XP_004955594.1 FRIGIDA-like protein 4b                                              |
| TCONS_00021415 | -0.369068 | -1.05222   | -0.843326  | BGIOSGA023641 | XP_006656520.1 PREDICTED: uncharacterized protein LOC102705442                      |
| TCONS_00012416 | -0.368974 | 0.303911   | 0.132287   | BGIOSGA028448 | XP_015698980.1 probable LRR receptor-like serine/threonine-protein kinase At1g74360 |
| TCONS_00017097 | -0.368943 | 0.402103   | 0.204847   | BGIOSGA001860 | XP_006654022.1 aspartic proteinase                                                  |
| TCONS_00025916 | -0.368916 | 0.0437658  | 0.630424   | BGIOSGA013649 | XP_003573503.1 uncharacterized protein At1g01500                                    |
| TCONS_00030417 | -0.368169 | -1.246     | -0.0679465 | BGIOSGA030000 | XP_006660882.1 polygalacturonate 4-alpha-galacturonosyltransferase-like             |
| TCONS_00024372 | -0.368074 | 0.618953   | -1.77867   | BGIOSGA017809 | XP_006658150.1 monoacylglycerol lipase abhd6-B                                      |
| TCONS_00025710 | -0.368016 | -0.66175   | -0.591584  | BGIOSGA030559 | XP_006658132.1 B3 domain-containing protein Os07g0679700                            |
| TCONS_00001629 | -0.367962 | 1.8889     | -2.33149   | BGIOSGA030887 | XP_002450636.1 aspartic proteinase nepenthesin-1                                    |
| TCONS_00023216 | -0.367911 | 0.659453   | 0.251262   | BGIOSGA009645 | XP_015695090.1 60S ribosomal protein L4-1-like                                      |
| TCONS_00011236 | -0.367628 | 0.536674   | -0.530294  | BGIOSGA037214 | XP_004981251.1 heat shock cognate 70 kDa protein 2                                  |
| TCONS_00029383 | -0.367612 | -0.785908  | -0.485364  | BGIOSGA035935 | XP_006661467.1 cytochrome P450 71A1-like                                            |
| TCONS_00015197 | -0.367592 | -4.05408   | -1.65433   | BGIOSGA008765 | XP_006653047.1 protein QUIRKY                                                       |
| TCONS_00009695 | -0.367507 | 0.398899   | -0.788364  | BGIOSGA004748 | XP_006649752.1 V-type proton ATPase subunit a3-like                                 |
| TCONS_00005329 | -0.36744  | 0.43927    | 0.595094   | BGIOSGA007437 | XP_015689562.1 Golgi SNAP receptor complex member 1-2                               |
| TCONS_00029305 | -0.367108 | -0.581131  | -0.375276  | BGIOSGA004045 | XP_006660813.1 uridine kinase-like protein 1, chloroplastic                         |
| TCONS_00022988 | -0.367061 | 0.184986   | 0.191978   | BGIOSGA009789 | XP_015695065.1 PREDICTED: uncharacterized protein LOC102713103 isoform X2           |
| TCONS_00024413 | -0.367018 | -0.0104051 | 0.617267   | BGIOSGA026451 | XP_015694469.1 PREDICTED: uncharacterized protein LOC102702674                      |
| TCONS_00005178 | -0.36696  | 0.852018   | 0.898693   | BGIOSGA006860 | XP_015688059.1 pentatricopeptide repeat-containing protein At3g48250, chloroplastic |
| TCONS_00015416 | -0.366831 | 0.01378    | 0.052223   | BGIOSGA015957 | XP_015691872.1 F-box protein At3g57580-like                                         |
| TCONS_00006673 | -0.36682  | 1.46851    | 0.297955   | BGIOSGA017612 | XP_003570132.1 probable protein phosphatase 2C 26                                   |
| TCONS_00035426 | -0.366726 | -2.14666   | -0.790568  | BGIOSGA015373 | XP_006664257.1 phototropin-1A                                                       |
| TCONS_00028126 | -0.366724 | -1.24781   | 0.201504   | BGIOSGA026865 | XP_021310336.1 F-box/FBD/LRR-repeat protein At1g13570                               |
| TCONS_00026708 | -0.366681 | -1.06436   | -1.06806   | BGIOSGA014468 | NP_001183875.1 uncharacterized LOC100275491                                         |
| TCONS_00009817 | -0.366446 | 1.26912    | 1.35736    | BGIOSGA012370 | XP_008654433.1 uncharacterized protein LOC100275370                                 |
| TCONS_00011450 | -0.36636  | -1.14436   | -2.6519    | BGIOSGA033295 | XP_003558974.1 uncharacterized protein LOC100824638 isoform X2                      |
| TCONS_00006787 | -0.366338 | -0.734102  | -0.618896  | BGIOSGA005701 | XP_006647822.1 cellulose synthase-like protein E2                                   |
| TCONS_00007069 | -0.366305 | -2.3792    | 0.0211737  | BGIOSGA022956 | XP_006649157.1 phosphate transporter PHO1-2-like                                    |
| TCONS_00015038 | -0.366075 | 0.109794   | -0.058892  | BGIOSGA027577 | XP_010240509.1 DNA-directed RNA polymerases IV and V subunit 2                      |
| TCONS_00002353 | -0.365928 | -0.696975  | 0.0590746  | BGIOSGA004993 | XP_006646570.2 GDP-L-galactose phosphorylase 2-like                                 |
| TCONS_00033933 | -0.365884 | -3.45192   | -0.0953643 | BGIOSGA009297 | XP_015697821.1 protein tas-like isoform X1                                          |
| TCONS_00036603 | -0.365353 | 0.513059   | 0.432916   | BGIOSGA034578 | XP_015698195.1 actin cytoskeleton-regulatory complex protein pan1-like              |
| TCONS_00010625 | -0.365178 | 0.173088   | 0.549952   | BGIOSGA013247 | XP_006650370.1 ferredoxin                                                           |
| TCONS_00002089 | -0.364783 | 2.54105    | -0.219402  | BGIOSGA004716 | XP_006644929.1 PREDICTED: uncharacterized protein LOC102711204                      |
| TCONS_00029009 | -0.364724 | -1.86842   | -1.29755   | BGIOSGA021312 | XP_015696343.1 putative CBL-interacting protein kinase 27                           |
| TCONS_00016061 | -0.364567 | -1.88831   | -1.79838   | BGIOSGA006159 | XP_002447998.1 heavy metal-associated isoprenylated plant protein 16                |

transcriptome

|                |           |            |            |               |                                                                                                       |
|----------------|-----------|------------|------------|---------------|-------------------------------------------------------------------------------------------------------|
| TCONS_00028342 | -0.364447 | -0.642424  | 0.188412   | BGIOSGA026623 | XP_015696217.1 glutamic acid-rich protein-like                                                        |
| TCONS_00012063 | -0.364421 | -0.399067  | -0.495835  | BGIOSGA034095 | XP_015691076.1 phosphoinositide phosphatase SAC8 isoform X1                                           |
| TCONS_00000212 | -0.364066 | -0.518109  | 0.222846   | BGIOSGA002786 | XP_015699211.1 geranylgeranyl transferase type-1 subunit beta isoform X1                              |
| TCONS_00015832 | -0.364024 | -3.28433   | 0.115754   | BGIOSGA033850 | XP_004975514.1 heparan-alpha-glucosaminide N-acetyltransferase isoform X1                             |
| TCONS_00001973 | -0.364016 | -0.595204  | -0.104044  | BGIOSGA027987 | XP_006644840.1 probable 3-hydroxybutyryl-CoA dehydrogenase                                            |
| TCONS_00014334 | -0.364003 | -2.5474    | -1.46926   | BGIOSGA015005 | XP_006652338.1 glutamate decarboxylase 4-like                                                         |
| TCONS_00025568 | -0.363924 | -0.537779  | -0.0368989 | BGIOSGA024150 | XP_006658858.2 putative receptor-like protein kinase At4g00960                                        |
| TCONS_00009653 | -0.363473 | 0.0637489  | -0.0104839 | BGIOSGA004800 | XP_006649702.1 probable NAD(P)H-dependent oxidoreductase 1                                            |
| TCONS_00020148 | -0.363109 | -2.06518   | -0.719932  | BGIOSGA021863 | XP_006656658.1 GDSL esterase/lipase At5g45910-like isoform X2                                         |
| TCONS_00008817 | -0.363071 | -0.498881  | -0.0601018 | BGIOSGA005610 | XP_006647907.1 random slug protein 5-like                                                             |
| TCONS_00014688 | -0.363021 | 0.999808   | 0.256236   | BGIOSGA016860 | XP_015692112.1 PREDICTED: uncharacterized protein LOC102719669 isoform X2                             |
| TCONS_00009170 | -0.362859 | 1.12057    | 0.0354351  | BGIOSGA008708 | XP_010229321.1 AP-2 complex subunit alpha-2 isoform X1                                                |
| TCONS_00036883 | -0.362851 | -0.233492  | 0.472272   | BGIOSGA028831 | XP_015698245.1 la-related protein 6B-like                                                             |
| TCONS_00004895 | -0.362755 | -4.06489   | -2.07953   | BGIOSGA028714 | XP_015690661.1 formin-like protein 1                                                                  |
| TCONS_00000372 | -0.362645 | -3.53051   | -2.42156   | BGIOSGA021834 | XP_014753811.1 lachrymatory-factor synthase                                                           |
| TCONS_00016915 | -0.362638 | -0.51212   | 0.216766   | BGIOSGA024321 | XP_006653907.1 serine/threonine-protein kinase STY8-like                                              |
| TCONS_00021645 | -0.362538 | -0.62646   | -2.65845   | #N/A          | #N/A                                                                                                  |
| TCONS_00022722 | -0.362535 | -1.06834   | -0.441495  | BGIOSGA020729 | XP_006656339.1 endonuclease V                                                                         |
| TCONS_00008985 | -0.362287 | -1.72361   | -0.315542  | BGIOSGA009292 | XP_015689508.1 NADH dehydrogenase [ubiquinone] 1 alpha subcomplex subunit 9, mitochondrial isoform X2 |
| TCONS_00033271 | -0.362114 | 0.0351969  | -0.719032  | BGIOSGA035581 | XP_010237767.1 putative disease resistance RPP13-like protein 3                                       |
| TCONS_00013479 | -0.362032 | -1.19387   | 1.30102    | BGIOSGA003352 | NP_001333705.1 uncharacterized LOC103625736 precursor                                                 |
| TCONS_00014771 | -0.36172  | -0.431938  | 0.449557   | BGIOSGA033298 | XP_006652663.1 F-box protein PP2-A13-like                                                             |
| TCONS_00010593 | -0.361705 | 0.181176   | -0.108901  | BGIOSGA013212 | XP_006650342.2 pyruvate dehydrogenase E1 component subunit beta-4, chloroplastic-like                 |
| TCONS_00029311 | -0.36161  | 0.356661   | 0.407213   | BGIOSGA031054 | XP_015696896.1 TITAN-like protein isoform X3                                                          |
| TCONS_00001572 | -0.361575 | -0.688884  | -0.243035  | BGIOSGA004204 | XP_006644518.1 UPF0678 fatty acid-binding protein-like protein At1g79260                              |
| TCONS_00033044 | -0.361527 | 1.0532     | -0.101197  | BGIOSGA037056 | XP_006662762.2 60S ribosomal protein L3-like                                                          |
| TCONS_00013141 | -0.361321 | -0.51925   | 0.582421   | BGIOSGA009845 | XP_006650558.1 magnesium-dependent phosphatase 1-like                                                 |
| TCONS_00025640 | -0.361308 | 0.41363    | 0.454685   | BGIOSGA023786 | XP_003562532.1 uncharacterized protein LOC100829367                                                   |
| TCONS_00036715 | -0.361238 | -0.570278  | 0.654219   | BGIOSGA036598 | XP_015698409.1 TLD domain-containing protein 1                                                        |
| TCONS_00015054 | -0.361207 | -0.24685   | 0.362964   | BGIOSGA009993 | XP_006652911.1 putative chloride channel-like protein CLC-g                                           |
| TCONS_00012531 | -0.361029 | -1.59106   | -1.066     | BGIOSGA018680 | XP_006651528.1 interferon-related developmental regulator 2-like                                      |
| TCONS_00013621 | -0.360747 | 0.017255   | -0.234635  | BGIOSGA013477 | XP_006652083.1 SWI/SNF complex subunit SWI3D-like isoform X2                                          |
| TCONS_00004802 | -0.360476 | 0.0842728  | 0.635174   | BGIOSGA008212 | XP_006645089.1 5'-3' exoribonuclease 3 isoform X1                                                     |
| TCONS_00000094 | -0.360104 | -0.660373  | 0.0369813  | BGIOSGA004228 | XP_006643710.1 protein-lysine N-methyltransferase mettl10-like                                        |
| TCONS_00005873 | -0.360032 | -0.471806  | -0.283933  | BGIOSGA008005 | XP_015688857.1 UV-stimulated scaffold protein A homolog                                               |
| TCONS_00026942 | -0.360008 | -0.26396   | 0.373805   | BGIOSGA028992 | XP_021308234.1 titin homolog                                                                          |
| TCONS_00017774 | -0.359707 | -0.881597  | -0.292843  | BGIOSGA019839 | XP_015693270.1 protein ABCI12, chloroplastic                                                          |
| TCONS_00006031 | -0.359475 | -0.263403  | -0.286229  | BGIOSGA008183 | XP_006648628.1 PREDICTED: uncharacterized protein LOC102707377                                        |
| TCONS_00027214 | -0.359368 | 1.01993    | -0.223315  | BGIOSGA012075 | XP_006659031.1 PREDICTED: uncharacterized protein LOC102709862                                        |
| TCONS_00009228 | -0.359349 | 0.0721994  | 0.676869   | BGIOSGA013305 | XP_006649308.1 DUF21 domain-containing protein At2g14520-like                                         |
| TCONS_00011587 | -0.359232 | -1.85614   | -2.0792    | BGIOSGA020692 | XP_015696882.1 sufE-like protein 1, chloroplastic/mitochondrial                                       |
| TCONS_00003342 | -0.359202 | -0.929361  | -1.48004   | BGIOSGA010070 | XP_006650401.1 CSC1-like protein At1g10090 isoform X3                                                 |
| TCONS_00016665 | -0.359002 | 0.342247   | 0.497262   | BGIOSGA014297 | XP_015692247.1 histone-lysine N-methyltransferase ATXR2                                               |
| TCONS_00030489 | -0.358765 | -0.920053  | 0.916948   | BGIOSGA027713 | XP_015696611.1 U11/U12 small nuclear ribonucleoprotein 31 kDa protein                                 |
| TCONS_00026815 | -0.358521 | 0.183061   | 0.074142   | BGIOSGA002918 | XP_015696216.1 nitronate monooxygenase                                                                |
| TCONS_00012665 | -0.358504 | -0.0840599 | -0.371031  | BGIOSGA022773 | XP_015693346.1 60S ribosomal protein L15 isoform X3                                                   |
| TCONS_00016845 | -0.358498 | 0.416352   | 0.581004   | BGIOSGA018712 | XP_006653006.1 zinc finger CCCH domain-containing protein 32                                          |
| TCONS_00007701 | -0.358466 | -1.8168    | 0.328141   | BGIOSGA013693 | XP_002453610.1 E3 ubiquitin-protein ligase ATL31                                                      |
| TCONS_00006981 | -0.35839  | 0.0229834  | -0.446514  | BGIOSGA009163 | XP_015689408.1 guanine nucleotide exchange factor subunit Rich-like                                   |
| TCONS_00006820 | -0.35835  | -0.249609  | 0.69659    | BGIOSGA008995 | NP_001151430.1 SET domain containing protein                                                          |
| TCONS_00017337 | -0.357804 | 0.301278   | 0.577475   | BGIOSGA003024 | XP_012699764.1 uncharacterized protein LOC101781173                                                   |
| TCONS_00033268 | -0.357765 | -0.593578  | -0.0576052 | BGIOSGA035091 | XP_015697515.1 diphthamide biosynthesis protein 2                                                     |
| TCONS_00000894 | -0.357555 | -1.04509   | -0.379832  | BGIOSGA000168 | XP_006644153.1 protein SRG1-like                                                                      |
| TCONS_00037616 | -0.357539 | -0.341961  | -0.598952  | BGIOSGA009944 | XP_015698637.1 serine/threonine-protein kinase prp4B-like                                             |



## transcriptome

|                |           |             |            |               |                                                                                         |
|----------------|-----------|-------------|------------|---------------|-----------------------------------------------------------------------------------------|
| TCONS_00000572 | -0.357398 | -0.209952   | 0.521929   | BGIOSGA003153 | XP_006645712.1 protein TRIGALACTOSYLDIACYLGLYCEROL 4, chloroplastic                     |
| TCONS_00020189 | -0.357376 | -0.301311   | 1.59981    | BGIOSGA012581 | XP_010227995.1ethylene-responsive transcription factor RAP2-1                           |
| TCONS_00002917 | -0.35735  | 0.2627      | 0.0217996  | BGIOSGA018733 | XP_006643803.1 vegetative cell wall protein gp1-like                                    |
| TCONS_00025965 | -0.357182 | -1.2337     | -0.733796  | BGIOSGA018909 | XP_006659164.1 RNA polymerase sigma factor sigA                                         |
| TCONS_00026176 | -0.357137 | -4.04568    | -1.74477   | BGIOSGA028249 | XP_006659959.1 endo-1,3;1,4-beta-D-glucanase-like                                       |
| TCONS_00025555 | -0.357136 | -1.85274    | -0.940301  | BGIOSGA005203 | XP_015695249.1 probable inactive receptor kinase At5g10020                              |
| TCONS_00012275 | -0.357003 | -0.340795   | 0.0377972  | BGIOSGA001033 | XP_006651378.1 tubby-like F-box protein 6                                               |
| TCONS_00027283 | -0.356664 | -0.0935983  | 0.508896   | BGIOSGA027719 | XP_006659082.1 transcription factor RTE9-like                                           |
| TCONS_00036494 | -0.356548 | 0.243147    | -0.436778  | BGIOSGA015087 | XP_002442608.1 uncharacterized protein LOC8065246 isoform X2                            |
| TCONS_00007611 | -0.356497 | -1.87788    | -0.622339  | BGIOSGA004437 | XP_006647075.1 U-box domain-containing protein 52 isoform X1                            |
| TCONS_00025771 | -0.35627  | 0.926681    | -0.400904  | BGIOSGA021893 | XP_006659728.1 O-glucosyltransferase rumi-like                                          |
| TCONS_00009811 | -0.355227 | -0.411438   | 0.155254   | BGIOSGA000537 | XP_015690699.1 EVI5-like protein isoform X2                                             |
| TCONS_00012768 | -0.354995 | -0.252304   | 0.594153   | BGIOSGA000727 | XP_015690228.1 E3 ubiquitin protein ligase DRIP2                                        |
| TCONS_00013773 | -0.354788 | -3.81305    | -3.87915   | BGIOSGA015539 | XP_021319877.1cysteine-rich receptor-like protein kinase 15 isoform X1                  |
| TCONS_00028533 | -0.354601 | -0.123441   | 0.44903    | BGIOSGA015795 | XP_003576858.1F-box protein At1g47056                                                   |
| TCONS_00035428 | -0.354552 | 0.424646    | -0.757121  | BGIOSGA036839 | XP_006665005.1PREDICTED: uncharacterized protein LOC102708769 isoform X2                |
| TCONS_00015903 | -0.354506 | 0.151504    | 0.675784   | BGIOSGA019450 | XP_015692143.1 DEXH-box ATP-dependent RNA helicase DEXH7, chloroplastic-like isoform X1 |
| TCONS_00005786 | -0.354388 | -0.826899   | -0.630501  | BGIOSGA000006 | XP_004951289.1probable protein phosphatase 2C 13 isoform X1                             |
| TCONS_00026920 | -0.354363 | 0.63744     | -0.196688  | BGIOSGA013500 | XP_022683389.1G patch domain-containing protein 11                                      |
| TCONS_00016828 | -0.354363 | 0.400401    | 0.165882   | BGIOSGA013934 | XP_015692302.1 ubiquinol oxidase 4, chloroplastic/chromoplasmic                         |
| TCONS_00000251 | -0.354281 | -1.13697    | 0.0179167  | BGIOSGA002829 | XP_006643773.1 importin subunit alpha-2                                                 |
| TCONS_00029308 | -0.354237 | -2.2443     | -0.149407  | BGIOSGA016610 | XP_021302228.1putative F-box/FBD/LRR-repeat protein At4g03220 isoform X2                |
| TCONS_00014997 | -0.354165 | -1.08528    | 0.828354   | BGIOSGA011557 | XP_006652863.1 peroxidase 1                                                             |
| TCONS_00006973 | -0.353848 | -0.733668   | -0.978358  | BGIOSGA021738 | XP_015688782.1 phosphoinositide phosphatase SAC2-like isoform X1                        |
| TCONS_00009992 | -0.353727 | -0.660958   | -0.695706  | BGIOSGA012547 | XP_015690797.1 guanine nucleotide exchange factor SPIKE 1 isoform X2                    |
| TCONS_00012132 | -0.353677 | 0.780112    | -0.099909  | BGIOSGA010877 | XP_006651314.2 FIP1[III]-like protein                                                   |
| TCONS_00013286 | -0.353594 | -0.966236   | -0.329247  | BGIOSGA024814 | XP_008665555.1uncharacterized protein LOC103644136 isoform X1                           |
| TCONS_00008701 | -0.353304 | 1.34653     | 0.398124   | BGIOSGA016925 | XP_015689433.1PREDICTED: uncharacterized protein LOC102711409                           |
| TCONS_00009301 | -0.353124 | -0.342427   | 1.09091    | BGIOSGA011840 | XP_006649281.2 UDP-galactose/UDP-glucose transporter 2-like isoform X1                  |
| TCONS_00031742 | -0.352713 | -0.825612   | -0.290224  | BGIOSGA022207 | XP_006662143.2 U1 small nuclear ribonucleoprotein 70 kDa                                |
| TCONS_00004462 | -0.352653 | 0.114453    | 0.384031   | BGIOSGA035050 | XP_015689984.1 serpin-Z1-like                                                           |
| TCONS_00013549 | -0.352374 | -0.966349   | -0.702192  | BGIOSGA009426 | XP_015690748.1 putative ATPase N2B                                                      |
| TCONS_00031034 | -0.352349 | 0.46891     | 0.160082   | BGIOSGA032850 | XP_003573851.1mediator of RNA polymerase II transcription subunit 15a                   |
| TCONS_00031358 | -0.352302 | -0.269675   | -0.566226  | BGIOSGA009136 | XP_006661886.1 myosin 1-like                                                            |
| TCONS_00009077 | -0.352285 | -0.0668165  | 0.0376084  | BGIOSGA026471 | XP_006648156.1 ABC transporter F family member 3                                        |
| TCONS_00009423 | -0.351943 | 0.939086    | -0.263381  | BGIOSGA037417 | XP_006649495.1 ylmG homolog protein 2, chloroplastic                                    |
| TCONS_00019982 | -0.351881 | 0.180253    | -0.0859386 | BGIOSGA035272 | XP_004971196.16-phosphogluconate dehydrogenase, decarboxylating 1                       |
| TCONS_00032553 | -0.351594 | 0.0391596   | 0.135911   | BGIOSGA012289 | XP_006661952.1 SH3 domain-containing protein 2-like                                     |
| TCONS_00013397 | -0.351488 | -0.00969343 | 0.543421   | BGIOSGA009587 | XP_006650777.1 INO80 complex subunit B-like                                             |
| TCONS_00018222 | -0.351365 | -0.0680815  | 0.651796   | BGIOSGA020280 | XP_006654720.1PREDICTED: uncharacterized protein At4g29660-like                         |
| TCONS_00027388 | -0.351071 | -2.67965    | -3.46678   | BGIOSGA033427 | XP_022683193.1protein LSD1                                                              |
| TCONS_00035687 | -0.350727 | -0.756146   | -0.898687  | BGIOSGA037105 | XP_006663889.1 proteasome assembly chaperone 4                                          |
| TCONS_00002429 | -0.350715 | 0.112018    | -0.165079  | BGIOSGA019930 | XP_006645246.1 exocyst complex component EXO70B1-like                                   |
| TCONS_00015092 | -0.350346 | 0.0730256   | 0.131337   | BGIOSGA006572 | XP_006652940.1 plasma membrane ATPase                                                   |
| TCONS_00002997 | -0.350314 | -2.07546    | -1.23081   | BGIOSGA021040 | XP_015695178.1 stem 28 kDa glycoprotein-like                                            |
| TCONS_00032144 | -0.350263 | 0.448422    | -2.25092   | BGIOSGA002488 | XP_021306721.1shewanella-like protein phosphatase 1                                     |
| TCONS_00006168 | -0.349916 | -1.03219    | -0.148668  | BGIOSGA006391 | XP_015689019.1 ubiquitin thioesterase otubain-like                                      |
| TCONS_00035026 | -0.349773 | 0.337232    | 1.51471    | BGIOSGA007551 | XP_015698057.1 adagio-like protein 3                                                    |
| TCONS_00007365 | -0.349551 | -0.644817   | -0.329439  | BGIOSGA020630 | XP_015688457.1 tyrosine-sulfated glycopeptide receptor 1-like                           |
| TCONS_00037346 | -0.349383 | -0.468412   | -0.012163  | BGIOSGA009435 | XP_006664095.1 CTP synthase isoform X1                                                  |
| TCONS_00023705 | -0.349264 | 1.18096     | 0.37996    | BGIOSGA007697 | XP_006658577.1 regulator of nonsense transcripts 1 homolog                              |
| TCONS_00029297 | -0.349245 | -3.97024    | -2.39222   | BGIOSGA016214 | XP_021308070.1chloroplast envelope quinone oxidoreductase homolog                       |
| TCONS_00027854 | -0.34917  | -0.0199212  | -0.0896498 | BGIOSGA027151 | XP_003573495.1general transcription and DNA repair factor IIH subunit TFB1-1            |
| TCONS_00010867 | -0.349058 | 0.0778598   | 0.535174   | BGIOSGA013488 | XP_006651764.1 FIP1[V]-like protein                                                     |
| TCONS_00028448 | -0.348988 | -0.286748   | -1.04341   | BGIOSGA031833 | XP_015695695.1 protein indeterminate-domain 5, chloroplastic-like                       |

transcriptome

|                |           |            |            |              |                                                                                                                                            |
|----------------|-----------|------------|------------|--------------|--------------------------------------------------------------------------------------------------------------------------------------------|
| TCONS_00020723 | -0.348972 | 1.14329    | -0.0871981 | #N/A         | #N/A                                                                                                                                       |
| TCONS_00021998 | -0.348913 | -1.93165   | -2.108     | BGOSGA021519 | XP_006656852.2 probable peroxxygenase 4                                                                                                    |
| TCONS_00008181 | -0.348767 | 0.0578145  | 0.611191   | BGOSGA033237 | XP_015689638.1 ran-binding protein 10-like<br>XP_006647294.2 probable UDP-N-acetylglucosamine--peptide N-acetylglucosaminyltransferase SEC |
| TCONS_00008022 | -0.348726 | 0.873842   | 0.0958533  | BGOSGA000263 | XP_006645172.1 PREDICTED: uncharacterized protein LOC102710074                                                                             |
| TCONS_00004899 | -0.348695 | -0.0069112 | -0.581874  | BGOSGA007515 | XP_015690070.1 senescence-specific cysteine protease SAG39-like                                                                            |
| TCONS_00010973 | -0.348561 | -2.64539   | -6.15457   | BGOSGA015726 | XP_015694711.1 probable WRKY transcription factor 3                                                                                        |
| TCONS_00025463 | -0.348431 | -0.137438  | -0.221685  | BGOSGA010657 | XP_006647891.1 RINT1-like protein MAG2 isoform X1                                                                                          |
| TCONS_00008808 | -0.348295 | -0.18087   | 0.0865715  | BGOSGA005622 | XP_006658106.1 ribosome biogenesis protein NSA2 homolog                                                                                    |
| TCONS_00025690 | -0.348288 | -0.38379   | 0.276726   | BGOSGA023733 | XP_006664555.2 PREDICTED: uncharacterized protein LOC102701966                                                                             |
| TCONS_00036026 | -0.348248 | -0.459748  | 0.336145   | BGOSGA016920 | XP_015694914.1 DNA-directed RNA polymerase III subunit RPC8                                                                                |
| TCONS_00025086 | -0.348159 | -0.649785  | -0.259448  | BGOSGA028394 | XP_015689386.1 ubiquitin carboxyl-terminal hydrolase 15-like                                                                               |
| TCONS_00005758 | -0.348066 | -0.864848  | -0.58579   | BGOSGA026801 | XP_006652425.1 mitochondrial inner membrane protease ATP23                                                                                 |
| TCONS_00016121 | -0.347831 | 0.5975     | -0.110725  | BGOSGA006120 | XP_015696900.1 PREDICTED: uncharacterized protein LOC102720903                                                                             |
| TCONS_00001422 | -0.347578 | -0.957938  | -0.452615  | BGOSGA030262 | XP_015694853.1 probable serine/threonine-protein kinase WNK3 isoform X3                                                                    |
| TCONS_00034802 | -0.347535 | -0.0158524 | 0.763      | BGOSGA034482 | NP_001150452.160S ribosomal protein L12                                                                                                    |
| TCONS_00014865 | -0.347374 | 0.394761   | 0.0900558  | BGOSGA008871 | XP_006644328.1 aldehyde dehydrogenase family 2 member C4-like                                                                              |
| TCONS_00001249 | -0.347325 | 0.754301   | -1.22844   | BGOSGA038934 | #N/A                                                                                                                                       |
| TCONS_00013013 | -0.347282 | 1.24755    | 0.809263   | #N/A         | #N/A                                                                                                                                       |
| TCONS_00000956 | -0.347229 | -1.09997   | 0.555595   | BGOSGA018630 | XP_004968778.1 NPL4-like protein                                                                                                           |
| TCONS_00036604 | -0.347122 | -3.10227   | -3.19263   | BGOSGA037315 | XP_015698574.1 PREDICTED: uncharacterized protein LOC102710259                                                                             |
| TCONS_00033321 | -0.346751 | -1.45942   | 0.665941   | BGOSGA014272 | XP_006664858.2 uncharacterized HIT-like protein MT1300                                                                                     |
| TCONS_00007071 | -0.346614 | -1.1474    | -0.128794  | BGOSGA009253 | XP_006648084.1 ABC transporter I family member 19-like                                                                                     |
| TCONS_00010725 | -0.346612 | -0.318667  | 0.0438466  | BGOSGA006188 | XP_006651699.2 PREDICTED: uncharacterized protein LOC102721634                                                                             |
| TCONS_00005504 | -0.346459 | -1.48019   | -0.0942611 | BGOSGA007618 | XP_015689217.1 urease accessory protein F                                                                                                  |
| TCONS_00000421 | -0.346441 | -0.37909   | -0.807534  | BGOSGA019363 | XP_006643906.1 GDSL esterase/lipase At5g45910-like                                                                                         |
| TCONS_00036706 | -0.346315 | -2.12522   | -2.6789    | BGOSGA016081 | XP_004978707.1 protein FANTASTIC FOUR 3 isoform X2                                                                                         |
| TCONS_00036882 | -0.346087 | -0.971589  | -0.260062  | BGOSGA036438 | XP_006663913.1 protein ENHANCED DOWNY MILDEW 2-like                                                                                        |
| TCONS_00020440 | -0.346032 | 0.335496   | 0.256356   | BGOSGA025978 | XP_006655965.1 dynamin-2A-like                                                                                                             |
| TCONS_00010353 | -0.345963 | -1.11228   | -0.180002  | BGOSGA007484 | XP_006650224.1 resin homolog                                                                                                               |
| TCONS_00030571 | -0.345657 | -0.895496  | -0.519851  | BGOSGA004174 | XP_008670030.1sn1-specific diacylglycerol lipase beta                                                                                      |
| TCONS_00028007 | -0.345626 | -1.65364   | -0.55842   | BGOSGA029876 | XP_006660585.1 mitochondrial pyruvate carrier 1-like                                                                                       |
| TCONS_00009066 | -0.345624 | 0.430381   | -0.378178  | BGOSGA005338 | XP_006649182.1 50S ribosomal protein L9, chloroplastic-like                                                                                |
| TCONS_00035700 | -0.345604 | -0.0216046 | 0.510639   | BGOSGA004649 | XP_006663879.2 PREDICTED: uncharacterized protein LOC102721786                                                                             |
| TCONS_00034178 | -0.345442 | -0.248106  | -0.990278  | BGOSGA008170 | XP_006662678.1 PREDICTED: uncharacterized protein LOC102700746                                                                             |
| TCONS_00019046 | -0.34544  | 0.510086   | 0.515087   | BGOSGA021611 | XP_004962468.1 RING finger and transmembrane domain-containing protein 2                                                                   |
| TCONS_00032747 | -0.345252 | -0.760886  | -0.754196  | BGOSGA031361 | XP_006662090.1 aluminum-activated malate transporter 12                                                                                    |
| TCONS_00002442 | -0.345214 | -0.0330033 | 0.267395   | BGOSGA029386 | XP_003564965.1 transcription factor TCP20                                                                                                  |
| TCONS_00022516 | -0.345091 | -0.244796  | -0.152764  | BGOSGA007758 | XP_006656206.1 serine-threonine kinase receptor-associated protein-like                                                                    |
| TCONS_00014950 | -0.345065 | 0.356567   | 0.149393   | BGOSGA017129 | XP_006653772.1 imidazoleglycerol-phosphate dehydratase                                                                                     |
| TCONS_00015401 | -0.345051 | -1.61879   | -0.349682  | BGOSGA024529 | XP_006652114.1 PREDICTED: uncharacterized protein KIAA0930 homolog                                                                         |
| TCONS_00011306 | -0.345034 | -0.0568586 | -0.397658  | BGOSGA015439 | XP_008644344.1 uncharacterized protein LOC103625729                                                                                        |
| TCONS_00010098 | -0.344859 | 0.00466708 | -0.909642  | BGOSGA028256 | XP_006650096.1 villin-3-like                                                                                                               |
| TCONS_00010288 | -0.344753 | 0.392365   | 0.479972   | BGOSGA012851 | XP_015691211.1 PREDICTED: uncharacterized protein LOC102714907                                                                             |
| TCONS_00036535 | -0.344256 | -0.366998  | -0.988455  | BGOSGA024552 | XP_004964776.1 uncharacterized protein LOC101758371 isoform X3                                                                             |
| TCONS_00014279 | -0.344234 | 0.59295    | -0.897317  | BGOSGA020041 | XP_006652295.1 PREDICTED: uncharacterized protein LOC102711611                                                                             |
| TCONS_00016937 | -0.344063 | -0.300349  | 1.29491    | BGOSGA004901 | XP_004959920.1 probable magnesium transporter NIPA4                                                                                        |
| TCONS_00007236 | -0.344043 | -0.0596209 | -0.778968  | BGOSGA011520 | XP_006646781.1 catalase isozyme A-like                                                                                                     |
| TCONS_00018654 | -0.343996 | -1.8348    | -0.476179  | BGOSGA003468 | XP_021311031.1 peroxisomal fatty acid beta-oxidation multifunctional protein MFP2                                                          |
| TCONS_00021578 | -0.343531 | -0.0393765 | -0.0284449 | BGOSGA014074 | XP_006655773.1 U-box domain-containing protein 35                                                                                          |
| TCONS_00030744 | -0.34336  | -0.805269  | -1.3207    | BGOSGA026423 | XP_006662193.1 receptor-like protein kinase                                                                                                |
| TCONS_00024823 | -0.34326  | 0.646171   | -0.122126  | BGOSGA025444 | XP_006657582.1 F-box/LRR-repeat protein At2g43260-like                                                                                     |
| TCONS_00029439 | -0.343153 | -0.299274  | -0.303116  | BGOSGA008531 | XP_006660922.2 serine/threonine-protein kinase STY46-like                                                                                  |
| TCONS_00027165 | -0.343064 | -0.0785295 | 0.0136594  | BGOSGA029211 | XP_004974256.1 uncharacterized protein LOC101763437                                                                                        |
| TCONS_00004614 | -0.342877 | 1.64569    | 2.44171    | BGOSGA013553 | XP_006644896.1 cysteine synthase-like                                                                                                      |

## transcriptome

|                |           |            |            |               |                                                                                                  |
|----------------|-----------|------------|------------|---------------|--------------------------------------------------------------------------------------------------|
| TCONS_00029164 | -0.342809 | -1.57316   | -2.35926   | BGIOSGA023458 | XP_002460345.1 uncharacterized protein LOC8083228                                                |
| TCONS_00004965 | -0.342626 | 0.460538   | -0.0756828 | BGIOSGA000257 | XP_006645224.1 AP-4 complex subunit epsilon                                                      |
| TCONS_00016023 | -0.342518 | -0.861723  | 1.68339    | BGIOSGA011168 | XP_008673565.1 lecithin-cholesterol acyltransferase-like 1                                       |
| TCONS_00020187 | -0.342356 | -1.09445   | -0.747958  | BGIOSGA029575 | XP_006655824.1 coffeyl-CoA O-methyltransferase 1                                                 |
| TCONS_00016497 | -0.342353 | -0.251796  | -0.202025  | BGIOSGA014471 | XP_006652704.1 PREDICTED: uncharacterized protein LOC102717425                                   |
| TCONS_00038020 | -0.342184 | 2.91784    | -0.802864  | BGIOSGA037482 | XP_004964100.1 probable L-type lectin-domain containing receptor kinase S.7                      |
| TCONS_00006982 | -0.342147 | -0.261639  | -0.629878  | BGIOSGA037714 | XP_021314671.1 probable LIM domain-containing serine/threonine-protein kinase DDB_G0286997       |
| TCONS_00010682 | -0.342072 | -1.94029   | -0.317714  | BGIOSGA025662 | XP_006650403.1 growth-regulating factor 9                                                        |
| TCONS_00027146 | -0.342034 | -0.0275723 | -0.0317314 | BGIOSGA029190 | XP_006659697.1 probable UDP-N-acetylglucosamine--peptide N-acetylglucosaminyltransferase SPINDLY |
| TCONS_00029296 | -0.34195  | -2.3435    | -2.10726   | BGIOSGA031057 | XP_004957270.1 quinone-oxidoreductase QR1, chloroplastic                                         |
| TCONS_00011130 | -0.341886 | -1.43294   | -0.176426  | BGIOSGA013730 | XP_015690876.1 rRNA-processing protein EFG1-like                                                 |
| TCONS_00002655 | -0.34183  | -0.113092  | -0.710053  | BGIOSGA002566 | XP_015699139.1 snurportin-1                                                                      |
| TCONS_00020513 | -0.341692 | -1.31158   | -0.992391  | BGIOSGA020760 | XP_012701063.1 zinc finger protein HD1 isoform X1                                                |
| TCONS_00019177 | -0.341642 | 0.722138   | -0.126132  | BGIOSGA033091 | XP_003575421.1 ribosomal RNA-processing protein 14-C                                             |
| TCONS_00002679 | -0.341638 | 0.657088   | 0.0914333  | BGIOSGA018992 | XP_006645435.1 paired amphipathic helix protein Sin3-like 4                                      |
| TCONS_00011518 | -0.341578 | -0.547195  | 0.998472   | BGIOSGA011510 | XP_006649347.1 probable serine acetyltransferase 2                                               |
| TCONS_00035870 | -0.34153  | -0.9531    | -0.345777  | BGIOSGA037244 | XP_006663949.1 ultraviolet-B receptor UVR8 isoform X1                                            |
| TCONS_00004881 | -0.341477 | -0.635391  | -0.709332  | BGIOSGA000338 | NP_001336778.1 uncharacterized LOC100194187                                                      |
| TCONS_00028336 | -0.341388 | -0.291045  | -1.49524   | BGIOSGA029499 | XP_006659600.1 cytochrome b561 and DOMON domain-containing protein At4g12980-like                |
| TCONS_00003643 | -0.341356 | -1.48108   | -1.09531   | BGIOSGA004206 | XP_004973073.1 probable purine permease 4                                                        |
| TCONS_00002990 | -0.341263 | -0.650738  | 0.22119    | BGIOSGA004441 | XP_006643858.1 NADP-dependent malic enzyme, chloroplastic                                        |
| TCONS_00008872 | -0.341172 | -0.420558  | 0.0919567  | BGIOSGA030888 | XP_006647967.1 transmembrane emp24 domain-containing protein p24delta3-like                      |
| TCONS_00024100 | -0.341065 | -0.755902  | 0.569122   | #N/A          | #N/A                                                                                             |
| TCONS_00002159 | -0.340718 | -1.41788   | -2.18688   | BGIOSGA011032 | XP_006645000.1 probable protein phosphatase 2C 9                                                 |
| TCONS_00023902 | -0.340695 | 1.66942    | 0.81013    | BGIOSGA006218 | XP_015694683.1 zinc finger and BTB domain-containing protein 47-like                             |
| TCONS_00003660 | -0.340644 | 0.701309   | 0.32715    | BGIOSGA001544 | XP_015692902.1 PREDICTED: uncharacterized protein LOC102714046                                   |
| TCONS_00015598 | -0.340068 | -0.533353  | 0.66072    | BGIOSGA017458 | XP_006653260.1 PREDICTED: uncharacterized protein LOC102714286, partial                          |
| TCONS_00021841 | -0.339734 | -0.363286  | -0.353065  | BGIOSGA021676 | NP_001152650.1 acylaminoacyl-peptidase 1                                                         |
| TCONS_00025748 | -0.339658 | -0.0204955 | 0.0369985  | BGIOSGA028870 | XP_015695134.1 PREDICTED: uncharacterized protein LOC102715960                                   |
| TCONS_00028190 | -0.339456 | -0.876953  | 0.251284   | BGIOSGA029195 | XP_006660221.1 protein DMR6-LIKE OXYGENASE 2-like                                                |
| TCONS_00037011 | -0.339411 | -1.13034   | -3.29816   | #N/A          | #N/A                                                                                             |
| TCONS_00016107 | -0.339375 | -1.25869   | -0.200342  | BGIOSGA005687 | NP_001152152.1 F-box domain containing protein                                                   |
| TCONS_00002111 | -0.339083 | -1.16615   | -0.816256  | BGIOSGA008829 | XP_008654305.1 uncharacterized LOC100192661 isoform X1                                           |
| TCONS_00005099 | -0.339022 | -0.572997  | -0.0923812 | BGIOSGA040355 | XP_002459105.1 proline synthase co-transcribed bacterial homolog protein isoform X1              |
| TCONS_00024450 | -0.338971 | 0.764312   | 0.401973   | BGIOSGA021736 | XP_006655879.1 nucleolar GTP-binding protein 1-like                                              |
| TCONS_00024443 | -0.338883 | -1.71591   | 0.400938   | BGIOSGA024962 | XP_006657398.1 GTPase activating protein 1-like                                                  |
| TCONS_00030959 | -0.338653 | -0.97077   | -0.713734  | BGIOSGA038425 | XP_002465702.1 uncharacterized protein LOC8054253                                                |
| TCONS_00034310 | -0.338501 | -5.02486   | -2.45513   | BGIOSGA018646 | XP_006663216.1 IQ domain-containing protein IQM3-like                                            |
| TCONS_00003161 | -0.338464 | -1.12457   | -0.453888  | BGIOSGA021718 | XP_002466320.125.3 kDa vesicle transport protein                                                 |
| TCONS_00026804 | -0.338291 | 0.197796   | -0.310193  | BGIOSGA028866 | XP_006660225.1 PREDICTED: uncharacterized protein LOC102702682                                   |
| TCONS_00017807 | -0.338112 | -0.325703  | 1.12762    | BGIOSGA019866 | XP_006654401.1 PREDICTED: uncharacterized protein LOC102704805 isoform X1                        |
| TCONS_00003766 | -0.338022 | 1.53859    | 0.117796   | BGIOSGA017445 | XP_006644279.1 B2 protein                                                                        |
| TCONS_00032390 | -0.337946 | -0.270672  | -0.142606  | BGIOSGA023856 | XP_015697476.1 PREDICTED: uncharacterized protein LOC102716070                                   |
| TCONS_00006488 | -0.337924 | -0.483291  | -1.44409   | BGIOSGA036578 | XP_006647545.1 putative cyclic nucleotide-gated ion channel 15                                   |
| TCONS_00032647 | -0.337823 | -0.0230371 | -0.204517  | BGIOSGA034929 | XP_002464991.1 short-chain dehydrogenase TIC 32, chloroplastic                                   |
| TCONS_00013462 | -0.337707 | -0.865735  | 0.542947   | BGIOSGA025448 | XP_006650833.1 transmembrane protein 184B                                                        |
| TCONS_00003741 | -0.337609 | -0.167549  | -0.370663  | BGIOSGA001467 | XP_006645973.2 protein kinase and PP2C-like domain-containing protein                            |
| TCONS_00025670 | -0.337514 | 0.239607   | 0.411385   | BGIOSGA023753 | XP_015694995.1 protein NETWORKED 3A-like                                                         |
| TCONS_00024983 | -0.337498 | -0.261622  | 1.26572    | BGIOSGA018725 | XP_006654096.1 phospholipase D alpha 1-like                                                      |
| TCONS_00021243 | -0.337463 | -0.668778  | 0.391233   | BGIOSGA035713 | XP_006657253.1 heat shock 70 kDa protein 16                                                      |
| TCONS_00010909 | -0.337345 | 0.00295355 | -0.468703  | BGIOSGA013522 | XP_006651798.1 vacuolar protein sorting-associated protein 51 homolog                            |
| TCONS_00011622 | -0.337152 | 0.945154   | 0.44818    | BGIOSGA011388 | XP_006651069.2 PREDICTED: uncharacterized protein LOC102718817, partial                          |

transcriptome

|                |           |            |             |               |                                                                                               |
|----------------|-----------|------------|-------------|---------------|-----------------------------------------------------------------------------------------------|
| TCONS_00014633 | -0.337006 | -1.50088   | -0.312765   | BGIOSGA016790 | XP_006652538.2 probable sphingolipid transporter spinster homolog 2                           |
| TCONS_00020638 | -0.336995 | -1.60904   | -0.136188   | BGIOSGA021352 | XP_010233889.1jasmonate O-methyltransferase<br>XP_006664379.2 putative CCA tRNA               |
| TCONS_00035649 | -0.336831 | 1.11974    | -0.137087   | BGIOSGA022937 | nucleotidyltransferase 2                                                                      |
| TCONS_00005589 | -0.336623 | -0.0177587 | -0.213856   | BGIOSGA029411 | XP_006647015.1 kynurenine formamidase-like<br>XP_015689726.1 membrane-associated              |
| TCONS_00009527 | -0.336512 | -1.5745    | -1.04374    | BGIOSGA012075 | progesterone-binding protein 4 isoform X1<br>XP_015698772.1 dual specificity protein kinase   |
| TCONS_00036237 | -0.336472 | -0.0153695 | -0.405966   | BGIOSGA019427 | shkD<br>XP_015691452.1 exocyst complex component                                              |
| TCONS_00014247 | -0.33645  | 0.242628   | 0.0620548   | BGIOSGA016784 | SEC5A-like<br>XP_004971131.1 uncharacterized protein                                          |
| TCONS_00007347 | -0.336307 | -0.931839  | -0.137894   | BGIOSGA026597 | LOC101786617                                                                                  |
| TCONS_00009656 | -0.336296 | -1.68624   | -1.54219    | BGIOSGA033828 | XP_006651205.1 purple acid phosphatase 4-like                                                 |
| TCONS_00011370 | -0.33629  | -0.683934  | 0.557207    | BGIOSGA018032 | XP_015690320.1 gibberellin 20 oxidase 1-like<br>XP_004976604.1 calcium-dependent protein      |
| TCONS_00014823 | -0.335888 | -0.290469  | -0.0875805  | BGIOSGA013791 | kinase 13<br>XP_021321955.1 disease resistance protein                                        |
| TCONS_00010659 | -0.335668 | -0.588437  | -0.287019   | BGIOSGA033598 | RPM1<br>XP_021313506.1 protein SENSITIVITY TO RED                                             |
| TCONS_00017021 | -0.335632 | -0.280154  | 0.239469    | BGIOSGA019068 | LIGHT REDUCED 1                                                                               |
| TCONS_00009163 | -0.335136 | 0.808744   | 0.97003     | BGIOSGA011690 | XP_006649251.1 THO complex subunit 1<br>XP_006659524.1 DNA-3-methyladenine                    |
| TCONS_00026833 | -0.335064 | -5.4508    | -0.239995   | BGIOSGA029754 | glycosylase isoform X2<br>XP_015696242.1 PREDICTED: uncharacterized                           |
| TCONS_00028706 | -0.334779 | -0.410199  | -0.248593   | BGIOSGA030467 | protein LOC102702035                                                                          |
| TCONS_00032393 | -0.334697 | 0.251687   | 0.231746    | BGIOSGA011818 | XP_010940715.1 60S ribosomal protein L23<br>XP_006653261.2 wall-associated receptor kinase    |
| TCONS_00013944 | -0.334455 | 1.26708    | -1.14276    | BGIOSGA010394 | 5-like                                                                                        |
| TCONS_00019913 | -0.334343 | -0.102687  | -0.335163   | BGIOSGA027556 | XP_015693012.1 chromatin modification-related<br>protein EAF1 B-like isoform X1               |
| TCONS_00005829 | -0.334156 | 0.513394   | 0.45285     | BGIOSGA003468 | XP_006647155.1 peroxisomal fatty acid beta-<br>oxidation multifunctional protein              |
| TCONS_00036144 | -0.33387  | -2.79991   | -1.28461    | BGIOSGA018537 | XP_006664070.1 glutathione synthetase,<br>chloroplastic-like                                  |
| TCONS_00005474 | -0.333861 | -1.01749   | -0.0856576  | BGIOSGA020662 | XP_015688777.1 TATA-binding protein-<br>associated factor BTAF1 isoform X1                    |
| TCONS_00017249 | -0.333752 | -0.127696  | -1.2886     | BGIOSGA002908 | XP_006655061.1 FACT complex subunit SSRP1-<br>B                                               |
| TCONS_00023258 | -0.333751 | -0.862377  | -1.20635    | BGIOSGA025299 | XP_006657521.1 protein CHUP1, chloroplastic-<br>like                                          |
| TCONS_00019150 | -0.333726 | 0.268017   | -0.482509   | BGIOSGA004761 | XP_006654306.2 UDP-glucuronic acid<br>decarboxylase 2                                         |
| TCONS_00015837 | -0.333425 | -0.790635  | 0.0998225   | BGIOSGA016337 | XP_015692185.1 PREDICTED: uncharacterized<br>protein LOC102720039                             |
| TCONS_00028139 | -0.333364 | -0.275938  | -1.11939    | BGIOSGA011585 | XP_006659485.1 glutamate decarboxylase-like<br>XP_006644571.1 bidirectional sugar transporter |
| TCONS_00001638 | -0.333299 | -4.03532   | -3.41118    | BGIOSGA016997 | SWEET2b<br>XP_003562360.1 conserved oligomeric Golgi                                          |
| TCONS_00013538 | -0.333281 | -0.235202  | -0.837251   | BGIOSGA009445 | complex subunit 2<br>XP_015693170.1 pleckstrin homology domain-<br>containing protein 1-like  |
| TCONS_00019400 | -0.333089 | 0.0497707  | -0.448297   | BGIOSGA034864 | XP_006658223.1 suppressor of RPS4-RLD 1                                                       |
| TCONS_00024466 | -0.332835 | -0.316913  | -0.00383215 | BGIOSGA024938 | XP_015697918.1 E3 ubiquitin-protein ligase<br>PRT6 isoform X1                                 |
| TCONS_00000205 | -0.332599 | 0.371592   | 0.162656    | BGIOSGA002777 | XP_006659265.1 PREDICTED: uncharacterized<br>protein LOC102710719                             |
| TCONS_00027688 | -0.332553 | -2.34004   | -2.14425    | BGIOSGA027318 | XP_015691178.1 phosphomevalonate kinase                                                       |
| TCONS_00011916 | -0.332362 | -1.39019   | -0.446826   | BGIOSGA013353 | XP_006658091.1 PRKR-interacting protein 1<br>homolog                                          |
| TCONS_00025683 | -0.332168 | -0.899908  | 0.314207    | BGIOSGA023740 | XP_006649303.2 probable receptor-like protein<br>kinase At5g24010                             |
| TCONS_00009222 | -0.332146 | 0.790858   | -0.0810499  | BGIOSGA011137 | XP_002461133.1 protein transport protein SFT2                                                 |
| TCONS_00022117 | -0.332077 | 0.293729   | -0.246318   | BGIOSGA023246 | XP_006659184.1 helicase-like transcription factor<br>CHR28                                    |
| TCONS_00026025 | -0.332072 | 0.0609972  | -0.129879   | BGIOSGA014296 | XP_006653258.1 elongator complex protein 5-<br>like                                           |
| TCONS_00009515 | -0.332066 | -0.134169  | 0.473845    | BGIOSGA012063 | XP_006664075.1 DNA-directed RNA polymerase<br>I subunit rpa43-like isoform X1                 |
| TCONS_00037298 | -0.33171  | -0.402728  | -0.0696998  | BGIOSGA030216 | XP_006651969.1 D-xylose-proton symporter-like<br>3, chloroplastic                             |
| TCONS_00013441 | -0.331675 | -1.47435   | -0.454655   | BGIOSGA009543 | XP_021307180.1 GATA transcription factor 26                                                   |
| TCONS_00016344 | -0.331572 | -1.3758    | -0.679384   | BGIOSGA014623 | XP_003569364.1 uncharacterized protein<br>LOC100828895 isoform X2                             |
| TCONS_00001368 | -0.331479 | 0.66737    | 0.769258    | BGIOSGA003998 | XP_006658297.1 serine/threonine-protein kinase<br>RIO1-like                                   |
| TCONS_00023159 | -0.331418 | -0.53744   | 0.654685    | BGIOSGA007546 | XP_008656066.1 zinc-finger homeodomain<br>protein 6                                           |
| TCONS_00018375 | -0.331313 | -0.265727  | -0.996693   | BGIOSGA032818 | XP_006646805.1 histone deacetylase complex<br>subunit SAP18                                   |
| TCONS_00007260 | -0.331278 | -0.165956  | 0.347394    | BGIOSGA007222 | XP_003580147.1 hydroxyproline O-<br>arabinosyltransferase 3                                   |
| TCONS_00017719 | -0.331249 | 0.371643   | 0.352983    | BGIOSGA003238 | XP_015698025.1 PREDICTED: uncharacterized<br>protein LOC102711575 isoform X1                  |
| TCONS_00032840 | -0.330857 | -0.0032405 | -0.735602   | BGIOSGA036729 | XP_006657765.1 DEAD-box ATP-dependent<br>RNA helicase 32                                      |
| TCONS_00025197 | -0.330774 | -0.461195  | 0.0715494   | BGIOSGA002329 | NP_001145912.1 putative RING zinc finger<br>domain superfamily protein                        |
| TCONS_00028983 | -0.330705 | -0.588394  | -0.0440995  | BGIOSGA009957 | XP_006662604.2 transcription factor<br>DIVARICATA-like                                        |
| TCONS_00032711 | -0.330665 | -0.39135   | -1.08719    | BGIOSGA003670 | #N/A                                                                                          |
| TCONS_00031603 | -0.330472 | -1.4043    | -0.735762   | #N/A          | #N/A                                                                                          |
| TCONS_00020556 | -0.330381 | -0.171284  | -1.88902    | BGIOSGA008065 | XP_006656899.1 PREDICTED: uncharacterized<br>protein LOC102714472                             |

transcriptome

|                |           |             |            |               |                                                                                          |
|----------------|-----------|-------------|------------|---------------|------------------------------------------------------------------------------------------|
| TCONS_00019700 | -0.330302 | 1.03354     | 0.77204    | BGIOSGA022304 | XP_006651417.2PREDICTED: uncharacterized protein LOC102712794                            |
| TCONS_00032735 | -0.330085 | -2.14175    | -0.736729  | BGIOSGA031371 | XP_015697216.1 VAN3-binding protein-like isoform X2                                      |
| TCONS_00002145 | -0.330045 | -0.00794624 | -0.480491  | BGIOSGA020798 | XP_006644671.1 epsin-2-like                                                              |
| TCONS_00006770 | -0.330045 | -1.1219     | 0.232795   | BGIOSGA021371 | XP_015688717.1 protein-tyrosine-phosphatase IBR5-like                                    |
| TCONS_00003596 | -0.330005 | 0.0989674   | -0.068048  | BGIOSGA001609 | XP_006644186.1 cyclin-L1-1                                                               |
| TCONS_00030609 | -0.329846 | 1.55839     | -1.32229   | BGIOSGA032433 | XP_002467392.1probable NAD(P)H-dependent oxidoreductase 1                                |
| TCONS_00016938 | -0.32976  | -0.939547   | -0.509747  | BGIOSGA014026 | XP_015691338.1 acyl-coenzyme A thioesterase 13-like                                      |
| TCONS_00031773 | -0.328807 | -0.557982   | -0.276636  | BGIOSGA019510 | XP_006650285.1PREDICTED: uncharacterized protein LOC102700605                            |
| TCONS_00026448 | -0.328772 | -0.942369   | 0.846158   | BGIOSGA040512 | XP_004973271.1bZIP transcription factor 11 isoform X1                                    |
| TCONS_00032908 | -0.328591 | -0.172303   | -0.176383  | BGIOSGA009356 | XP_015689584.1 heterogeneous nuclear ribonucleoprotein H3 isoform X2                     |
| TCONS_00018282 | -0.328584 | -6.17204    | -1.83182   | BGIOSGA016684 | XP_006654762.1 cytochrome b561 and DOMON domain-containing protein At3g61750-like        |
| TCONS_00006487 | -0.328432 | -0.852365   | -0.337782  | BGIOSGA014705 | XP_006647543.1 phenylalanine ammonia-lyase-like                                          |
| TCONS_00036818 | -0.328342 | -3.72891    | -1.74107   | BGIOSGA025174 | XP_006663875.2 peroxidase 43                                                             |
| TCONS_00029400 | -0.327703 | 0.89477     | 0.672376   | BGIOSGA003811 | XP_006661480.1 E3 ubiquitin ligase BIG BROTHER-related-like                              |
| TCONS_00017721 | -0.327642 | 1.47966     | 0.372664   | BGIOSGA001350 | XP_004954076.1UDP-D-xylose:L-fucose alpha-1,3-D-xylosyltransferase MGP4                  |
| TCONS_00006664 | -0.327278 | -3.19771    | -1.78419   | BGIOSGA034079 | XP_021301678.1serine carboxypeptidase-like 2                                             |
| TCONS_00014475 | -0.327046 | 0.208052    | 0.75821    | BGIOSGA016635 | XP_006653544.1 trihelix transcription factor GT-1-like                                   |
| TCONS_00031303 | -0.32692  | -3.14574    | -0.744603  | BGIOSGA029906 | XP_004982889.13-ketoacyl-CoA synthase 12                                                 |
| TCONS_00008210 | -0.326815 | -0.315802   | -1.59286   | BGIOSGA010378 | XP_006647402.1 beta-1,3-galactosyltransferase 7-like                                     |
| TCONS_00027430 | -0.326715 | -0.373591   | -0.745514  | BGIOSGA033795 | XP_004979650.1putative disease resistance protein At1g50180                              |
| TCONS_00011768 | -0.326703 | -1.14435    | -1.5127    | BGIOSGA014476 | XP_006649604.1 probable protein S-acyltransferase 22                                     |
| TCONS_00017911 | -0.326631 | -0.76936    | -0.221495  | BGIOSGA012284 | XP_003568339.1coronatine-insensitive protein homolog 1b isoform X2                       |
| TCONS_00006627 | -0.326149 | -0.694751   | 0.269504   | BGIOSGA008792 | XP_006647672.1 DNA-directed RNA polymerase III subunit RPC10-like                        |
| TCONS_00018641 | -0.326045 | -0.548585   | -0.550371  | BGIOSGA015185 | XP_006654054.1 transport inhibitor response 1-like protein Os05g0150500                  |
| TCONS_00019575 | -0.325971 | -1.13691    | -0.814992  | BGIOSGA001299 | XP_006654600.1 traB domain-containing protein-like                                       |
| TCONS_00037359 | -0.325969 | 0.428197    | -0.493302  | BGIOSGA033678 | XP_006664098.1 GTP-binding protein SAR1A                                                 |
| TCONS_00005587 | -0.325933 | -1.56202    | -1.52465   | BGIOSGA034023 | XP_004951642.1premnaspirodine oxygenase                                                  |
| TCONS_00031254 | -0.325804 | 0.50026     | 0.633543   | BGIOSGA033072 | XP_006662411.1 protein flUG                                                              |
| TCONS_00007184 | -0.325783 | 0.36291     | -1.39694   | BGIOSGA007314 | XP_006646754.1 glycerate dehydrogenase                                                   |
| TCONS_00006410 | -0.32568  | -1.056      | 0.262883   | BGIOSGA008572 | XP_003572693.1transcription termination factor MTERF5, chloroplastic                     |
| TCONS_00011196 | -0.32568  | -0.19264    | 0.0879617  | BGIOSGA013798 | XP_015690121.1 magnesium-chelatase subunit ChID, chloroplastic                           |
| TCONS_00037100 | -0.325534 | 0.0489455   | 0.034375   | BGIOSGA011620 | XP_015698706.1PREDICTED: uncharacterized protein LOC102710931 isoform X1                 |
| TCONS_00012237 | -0.3252   | 0.173419    | 1.11065    | BGIOSGA026140 | XP_004984440.1sucrose synthase 4                                                         |
| TCONS_00019220 | -0.325067 | -1.2495     | 0.775413   | BGIOSGA009124 | XP_006647980.1 N-alpha-acetyltransferase 40                                              |
| TCONS_00010763 | -0.325065 | 0.713848    | 0.902888   | BGIOSGA013388 | XP_006651725.1 pescadillo homolog                                                        |
| TCONS_00000904 | -0.32484  | 1.25763     | -0.0419256 | BGIOSGA003490 | XP_006644159.1 probable phosphoinositide phosphatase SAC9                                |
| TCONS_00027194 | -0.324811 | -0.825609   | 0.359154   | BGIOSGA028914 | XP_002444863.1BTB/POZ domain-containing protein At1g21780                                |
| TCONS_00034994 | -0.324789 | -0.00546481 | -0.493532  | BGIOSGA033859 | XP_015697680.1 glutamyl-tRNA(Gln) amidotransferase subunit A                             |
| TCONS_00030272 | -0.324431 | 0.665419    | 1.28527    | BGIOSGA029533 | XP_015696871.1 uncharacterized transporter YBR287W-like isoform X2                       |
| TCONS_00018466 | -0.324404 | -0.681985   | 0.24949    | BGIOSGA008411 | XP_015692445.1 uncharacterized zinc finger protein At4g06634-like                        |
| TCONS_00014129 | -0.32403  | -0.665167   | -0.857251  | BGIOSGA007382 | XP_003579626.1probable metal-nicotinamine transporter YSL6                               |
| TCONS_00018478 | -0.32397  | 1.14006     | 0.570042   | BGIOSGA038052 | XP_006653961.2 pumilio homolog 1-like                                                    |
| TCONS_00008511 | -0.323897 | -0.664721   | -0.0176565 | BGIOSGA010460 | XP_006647621.1 transcription initiation factor TFIID subunit 4b-like                     |
| TCONS_00018462 | -0.323866 | -1.31963    | -2.67209   | BGIOSGA008585 | XP_006653945.1 methionine S-methyltransferase-like                                       |
| TCONS_00021650 | -0.323807 | -1.79602    | -0.83475   | BGIOSGA035432 | XP_006655813.1 disease resistance protein RPM1-like                                      |
| TCONS_00002276 | -0.32376  | 0.334428    | 0.64893    | BGIOSGA004914 | XP_006645112.1 PHD finger protein At1g33420                                              |
| TCONS_00000095 | -0.323698 | -0.0321119  | 0.0551874  | BGIOSGA027971 | XP_002457471.1beta-glucuronosyltransferase GlcAT14A                                      |
| TCONS_00021277 | -0.323677 | -0.155475   | 0.290335   | BGIOSGA023502 | XP_006656405.1 RNA polymerase I-specific transcription initiation factor RRN3 isoform X1 |
| TCONS_00033008 | -0.323507 | -0.926428   | -1.02752   | BGIOSGA016384 | XP_006663233.1 digalactosyldiacylglycerol synthase 1, chloroplastic-like                 |
| TCONS_00018444 | -0.323502 | -0.775309   | -0.620963  | BGIOSGA016403 | XP_015693117.1 proline-rich receptor-like protein kinase PERK8                           |
| TCONS_00034335 | -0.323476 | -1.90045    | 0.0139688  | BGIOSGA031769 | XP_006663228.1PREDICTED: uncharacterized protein LOC102712306                            |
| TCONS_00033082 | -0.323396 | 1.12762     | 0.347702   | BGIOSGA018263 | XP_006662781.2 transmembrane 9 superfamily member 1                                      |
| TCONS_00026444 | -0.323395 | 0.0615951   | -1.72307   | BGIOSGA030103 | XP_006661098.1 UPF0481 protein At3g47200-like                                            |
| TCONS_00009985 | -0.323351 | -0.919919   | -0.536482  | BGIOSGA030474 | XP_006650017.1 myb family transcription factor APL-like                                  |

transcriptome

|                |           |           |            |               |                                                                                                |
|----------------|-----------|-----------|------------|---------------|------------------------------------------------------------------------------------------------|
| TCONS_00010902 | -0.322889 | 0.413457  | 0.156338   | BGIOSGA013517 | XP_003560086.1WD repeat-containing protein PCN                                                 |
| TCONS_00003548 | -0.322868 | -1.17704  | -1.64265   | BGIOSGA001659 | XP_006644167.1 acyltransferase-like protein At1g54570, chloroplastic isoform X2                |
| TCONS_00035974 | -0.322762 | -0.36695  | -0.398331  | BGIOSGA036257 | XP_010276527.1 FACT complex subunit SPT16-like                                                 |
| TCONS_00018157 | -0.32273  | 0.528148  | 0.211464   | BGIOSGA017675 | XP_006654666.2 hexokinase-5                                                                    |
| TCONS_00018453 | -0.322556 | -0.462424 | -0.433265  | BGIOSGA008067 | XP_021303011.1protein MEI2-like 3 isoform X2                                                   |
| TCONS_00028384 | -0.322528 | 0.663175  | -0.552323  | BGIOSGA033343 | XP_006659635.1 NAC domain-containing protein 83-like                                           |
| TCONS_00017509 | -0.322469 | -0.662639 | -0.675181  | BGIOSGA019583 | XP_015692927.1PREDICTED: uncharacterized protein LOC102707030 isoform X2                       |
| TCONS_00028020 | -0.322335 | -0.924216 | -0.393547  | BGIOSGA026971 | XP_006659399.2 RNA-binding protein 25 isoform X3                                               |
| TCONS_00030391 | -0.322274 | -0.722311 | -0.436118  | BGIOSGA026539 | XP_006660864.1 plant UBX domain-containing protein 8-like                                      |
| TCONS_00012133 | -0.322239 | 0.487776  | 0.444776   | BGIOSGA015175 | NP_001141020.1uncharacterized LOC100273099 precursor                                           |
| TCONS_00018261 | -0.321944 | -1.48821  | -0.800605  | BGIOSGA023202 | XP_006655556.1 probable E3 ubiquitin-protein ligase HIP1                                       |
| TCONS_00004778 | -0.321864 | -0.716292 | -0.206352  | BGIOSGA032853 | XP_006645072.1 putative UDP-rhamnose:rhamnosyltransferase 1                                    |
| TCONS_00021345 | -0.321844 | -0.818598 | -1.78227   | BGIOSGA012582 | XP_006656463.1 protein NRT1/ PTR FAMILY 8.3-like isoform X1                                    |
| TCONS_00003669 | -0.321809 | 0.396098  | 0.109889   | BGIOSGA001538 | XP_004967459.1trafficking protein particle complex subunit 1                                   |
| TCONS_00010992 | -0.321773 | -0.893682 | -0.884284  | BGIOSGA013595 | XP_006650620.1PREDICTED: uncharacterized protein LOC102704320                                  |
| TCONS_00002133 | -0.321406 | -0.751008 | -0.771448  | BGIOSGA025786 | XP_006644976.2 UDP-glucuronic acid decarboxylase 1-like                                        |
| TCONS_00002247 | -0.321322 | -0.321045 | -0.172927  | BGIOSGA017925 | XP_003564717.1ammonium transporter 3 member 1                                                  |
| TCONS_00008126 | -0.321315 | 0.456779  | 0.0677385  | BGIOSGA007344 | XP_004952654.140S ribosomal protein S14                                                        |
| TCONS_00014565 | -0.321262 | 0.194894  | 0.765523   | BGIOSGA031186 | XP_015691516.1 2,3-dimethylmalate lyase-like                                                   |
| TCONS_00039715 | -0.321152 | -0.121729 | -2.56421   | BGIOSGA025089 | XP_004968783.1pathogenesis-related protein PRMS                                                |
| TCONS_00017425 | -0.321135 | -2.3729   | -1.27638   | BGIOSGA028167 | XP_006654184.1 probable LRR receptor-like serine/threonine-protein kinase At1g56140 isoform X2 |
| TCONS_00001963 | -0.321112 | 0.403823  | -1.63274   | BGIOSGA004598 | XP_006646403.1 probable nucleoredoxin 2                                                        |
| TCONS_00019038 | -0.32088  | 0.0494192 | -0.503532  | BGIOSGA026402 | XP_006655186.2 mediator of RNA polymerase II transcription subunit 33A-like                    |
| TCONS_00004931 | -0.320705 | 0.749699  | 0.820518   | BGIOSGA000070 | XP_006646587.1 E3 ubiquitin-protein ligase RGLG2-like                                          |
| TCONS_00030411 | -0.320545 | -1.17295  | -0.46809   | BGIOSGA004895 | XP_015696433.1PREDICTED: uncharacterized protein LOC102710330                                  |
| TCONS_00002475 | -0.320485 | 0.182167  | 0.231175   | BGIOSGA005119 | XP_006645287.1 homeobox protein LUMINDEPENDENS                                                 |
| TCONS_00033949 | -0.320425 | -0.184667 | -0.567457  | BGIOSGA035543 | XP_015697734.1 disease resistance protein RPM1-like                                            |
| TCONS_00009103 | -0.320358 | -1.76174  | -0.536206  | BGIOSGA007293 | XP_015689185.1 RING-H2 finger protein ATL80-like                                               |
| TCONS_00036920 | -0.320321 | -0.924705 | -0.797025  | BGIOSGA036405 | XP_006663925.1 probable GPI-anchored adhesin-like protein PGA55                                |
| TCONS_00025116 | -0.32028  | -0.249003 | 0.564466   | BGIOSGA024286 | XP_006657712.1 ranBP2-type zinc finger protein At1g67325-like                                  |
| TCONS_00019821 | -0.320266 | 0.560245  | -0.593508  | BGIOSGA017534 | XP_006654813.1 protein SUPPRESSOR OF PHYA-105 1-like isoform X1                                |
| TCONS_00032497 | -0.320217 | -0.083645 | 0.104455   | BGIOSGA031620 | XP_015697467.1 nucleolar complex protein 2 homolog                                             |
| TCONS_00028243 | -0.320115 | -1.0259   | -0.97045   | BGIOSGA030918 | XP_015696187.1 tricin synthase 2-like                                                          |
| TCONS_00017112 | -0.319997 | -0.243645 | 0.0297998  | BGIOSGA016586 | XP_015692439.1 phosphoglycerate mutase-like protein AT74H                                      |
| TCONS_00005502 | -0.319618 | 0.268934  | 0.240093   | BGIOSGA005497 | XP_008645280.1auxin-responsive protein SAUR71                                                  |
| TCONS_00012913 | -0.319513 | -1.00773  | 0.554601   | #N/A          | #N/A                                                                                           |
| TCONS_00029494 | -0.319467 | 0.193246  | 0.00144237 | BGIOSGA023378 | XP_007011925.1 transmembrane 9 superfamily member 10                                           |
| TCONS_00015538 | -0.319463 | -0.168483 | -0.624166  | BGIOSGA026459 | XP_014751494.1probable carbohydrate esterase At4g34215                                         |
| TCONS_00001925 | -0.319147 | -0.557549 | -0.41433   | BGIOSGA024057 | XP_006644800.2 zinc-metalloproteinase, peroxisomal-like                                        |
| TCONS_00020590 | -0.31899  | 1.77845   | 0.909116   | BGIOSGA022774 | XP_006656017.1 protein HOMOLOG OF MAMMALIAN LYST-INTERACTING PROTEIN 5                         |
| TCONS_00013029 | -0.318757 | 0.378498  | -0.468635  | BGIOSGA034510 | XP_006650470.1 phosphatidylinositol 4-phosphate 5-kinase 1                                     |
| TCONS_00006939 | -0.318741 | -0.26936  | -0.138463  | BGIOSGA015003 | XP_015689357.1PREDICTED: uncharacterized protein LOC102716577                                  |
| TCONS_00009488 | -0.318478 | -0.844003 | -0.742009  | BGIOSGA018015 | XP_002468345.1mitochondrial import inner membrane translocase subunit TIM22-3                  |
| TCONS_00020886 | -0.318403 | 0.408773  | 0.49499    | BGIOSGA011537 | XP_015694407.1 K(+) efflux antiporter 4-like                                                   |
| TCONS_00036941 | -0.31836  | -0.144957 | -0.241306  | BGIOSGA021765 | XP_004960778.1serine carboxypeptidase 1                                                        |
| TCONS_00004638 | -0.318178 | 0.0818461 | -0.228332  | BGIOSGA000579 | XP_006644920.1 probable receptor-like protein kinase At3g55450                                 |
| TCONS_00019089 | -0.318144 | 0.226139  | -0.764473  | #N/A          | #N/A                                                                                           |
| TCONS_00028041 | -0.318087 | 0.312332  | -0.75743   | BGIOSGA027837 | XP_006659418.2 putative 1-phosphatidylinositol-3-phosphate 5-kinase FAB1C                      |
| TCONS_00015954 | -0.318026 | 0.643757  | 0.187738   | BGIOSGA028422 | XP_006652320.1 chloride channel protein CLC-c-like                                             |
| TCONS_00009078 | -0.318    | -0.412998 | -0.670796  | BGIOSGA009330 | XP_006648158.1 plant intracellular Ras-group-related LRR protein 6                             |
| TCONS_00007035 | -0.317708 | 0.277268  | 0.0915022  | BGIOSGA009220 | XP_006648062.1PREDICTED: uncharacterized protein LOC102703655                                  |
| TCONS_00017969 | -0.317696 | 0.364264  | 0.476395   | BGIOSGA033329 | XP_006654528.1 ammonium transporter 2 member 1                                                 |

transcriptome

|                |           |           |            |               |                                                                                                       |
|----------------|-----------|-----------|------------|---------------|-------------------------------------------------------------------------------------------------------|
| TCONS_00022684 | -0.317438 | -0.957075 | -0.125582  | BGIOSGA028277 | XP_004965684.1probable 4-coumarate--CoA ligase 4                                                      |
| TCONS_00003572 | -0.317262 | -0.723169 | -0.566549  | BGIOSGA003539 | XP_006645900.2 glutathione S-transferase 4-like                                                       |
| TCONS_00010873 | -0.317137 | -0.668088 | -0.15284   | BGIOSGA013497 | XP_014753213.1protein starmaker<br>XP_015699311.1 ribonuclease II,<br>chloroplastic/mitochondrial     |
| TCONS_00004705 | -0.317088 | 0.413492  | -0.718587  | BGIOSGA000513 | XP_002460346.1protein transport protein SEC23 isoform X2                                              |
| TCONS_00029165 | -0.316536 | -0.412258 | -0.769367  | BGIOSGA028844 | XP_003578066.1uncharacterized protein<br>LOC100821553                                                 |
| TCONS_00028926 | -0.316448 | -2.98541  | -0.768749  | BGIOSGA037744 | XP_006662811.1 transcriptional corepressor<br>SEUSS                                                   |
| TCONS_00033154 | -0.316422 | 1.05311   | 0.520196   | BGIOSGA030303 | XP_006644446.1 ketol-acid reductoisomerase,<br>chloroplastic-like                                     |
| TCONS_00001485 | -0.316399 | -0.400152 | 0.424673   | BGIOSGA002951 | XP_006657953.1 protein TIFY 10b-like                                                                  |
| TCONS_00024101 | -0.31623  | 0.947422  | -0.853791  | BGIOSGA010559 | XP_006662093.1 3-hydroxyisobutyryl-CoA<br>hydrolase 1-like                                            |
| TCONS_00032752 | -0.316194 | -0.970982 | -0.699439  | BGIOSGA031357 | XP_006644393.1 transcription factor bHLH144-<br>like                                                  |
| TCONS_00004021 | -0.316099 | -0.694962 | -0.626856  | BGIOSGA001173 | XP_015689604.1PREDICTED: uncharacterized<br>protein LOC102700308                                      |
| TCONS_00007718 | -0.316049 | 0.714726  | 0.431444   | BGIOSGA006772 | XP_024315978.1peptidyl-prolyl cis-trans<br>isomerase CYP21-3, mitochondrial-like                      |
| TCONS_00003237 | -0.315952 | 0.715193  | -0.670313  | BGIOSGA001976 | XP_006647407.1 ubiquitin carboxyl-terminal<br>hydrolase 4-like                                        |
| TCONS_00008231 | -0.315725 | -0.457757 | -0.0719006 | BGIOSGA014986 | XP_004968951.1DEAD-box ATP-dependent RNA<br>helicase 40 isoform X1                                    |
| TCONS_00001110 | -0.315576 | 0.291665  | 0.0763251  | BGIOSGA002288 | #N/A                                                                                                  |
| TCONS_00010388 | -0.315288 | 0.389818  | -1.1859    | #N/A          | #N/A                                                                                                  |
| TCONS_00035840 | -0.315072 | -0.695983 | -0.306951  | BGIOSGA019404 | XP_006662093.1 3-hydroxyisobutyryl-CoA<br>hydrolase 1-like                                            |
| TCONS_00001852 | -0.315034 | -0.52596  | 0.043458   | BGIOSGA004487 | XP_006646338.1 DNA polymerase eta<br>XP_006665186.2PREDICTED: uncharacterized<br>protein LOC102710555 |
| TCONS_00026128 | -0.315005 | -1.47924  | -0.369477  | BGIOSGA028204 | XP_006651173.1 beta-hexosaminidase 2                                                                  |
| TCONS_00023355 | -0.314925 | 0.751784  | -1.28755   | BGIOSGA017101 | XP_015697032.1 protein EXECUTER 1,<br>chloroplastic                                                   |
| TCONS_00031341 | -0.314844 | 0.245926  | -0.188411  | #N/A          | XP_006656000.1 sodium-coupled neutral amino<br>acid transporter 1                                     |
| TCONS_00020518 | -0.314804 | -1.58562  | -2.04182   | BGIOSGA031544 | XP_006660627.1 probable CCR4-associated<br>factor 1 homolog 7                                         |
| TCONS_00029003 | -0.31461  | -1.08231  | -0.119651  | BGIOSGA028741 | NP_001335846.1uncharacterized<br>LOC100275698                                                         |
| TCONS_00023947 | -0.314504 | -1.70981  | -1.03645   | BGIOSGA025979 | XP_006663952.2 coilin                                                                                 |
| TCONS_00037024 | -0.314001 | -1.30486  | 0.415303   | BGIOSGA036348 | XP_003567088.1anthocyanidin 5,3-O-<br>glucosyltransferase                                             |
| TCONS_00001775 | -0.313931 | 1.43334   | 0.0111566  | BGIOSGA024238 | XP_024311164.1putative serine/threonine-protein<br>kinase-like protein CCR3                           |
| TCONS_00033995 | -0.313821 | 2.43321   | 0.487323   | BGIOSGA019108 | XP_006660898.1 ribonuclease 1-like                                                                    |
| TCONS_00030437 | -0.313678 | 0.869077  | 3.47222    | BGIOSGA029365 | XP_006659037.2 phosphoinositide phosphatase<br>SAC1 isoform X1                                        |
| TCONS_00025792 | -0.313624 | -0.12956  | -0.0348484 | BGIOSGA008276 | XP_006653881.1 clathrin light chain 1                                                                 |
| TCONS_00015178 | -0.313498 | 0.214342  | -0.454347  | BGIOSGA027880 | XP_006657885.1PREDICTED: uncharacterized<br>protein LOC102716429 isoform X1                           |
| TCONS_00023980 | -0.313483 | -0.457996 | 0.234147   | BGIOSGA021762 | XP_015695955.1 pyrophosphate--fructose 6-<br>phosphate 1-phosphotransferase subunit alpha-<br>like    |
| TCONS_00026434 | -0.313483 | -0.977494 | 0.484682   | BGIOSGA022810 | XP_006660287.1 TBC1 domain family member 5<br>homolog A                                               |
| TCONS_00026954 | -0.312941 | -0.27172  | -0.217617  | BGIOSGA029008 | XP_006647298.1 polyadenylate-binding protein-<br>interacting protein 4-like                           |
| TCONS_00008006 | -0.312509 | 0.183471  | 0.249809   | BGIOSGA006472 | XP_015691752.1 probable glutamate<br>carboxypeptidase 2                                               |
| TCONS_00001804 | -0.312501 | 0.981937  | 0.443422   | BGIOSGA000855 | XP_015689701.1 putative pentatricopeptide<br>repeat-containing protein At1g77010,<br>mitochondrial    |
| TCONS_00011332 | -0.312294 | 0.522919  | -0.641976  | BGIOSGA007340 | XP_002452868.1uncharacterized protein<br>LOC8078905                                                   |
| TCONS_00006909 | -0.312199 | -0.346919 | 0.367442   | BGIOSGA009091 | XP_015697679.1 leucine-rich repeat extensin-<br>like protein 3                                        |
| TCONS_00033598 | -0.312133 | -0.376148 | -0.632722  | BGIOSGA013570 | XP_004982881.1long-chain-alcohol oxidase<br>FAO2                                                      |
| TCONS_00032416 | -0.312056 | 0.0445729 | 0.0944024  | BGIOSGA006017 | XP_006660582.2 CD2 antigen cytoplasmic tail-<br>binding protein 2                                     |
| TCONS_00028897 | -0.311947 | -0.35223  | -0.390238  | BGIOSGA030641 | XP_006656675.2 putative esterase YitV                                                                 |
| TCONS_00020179 | -0.311849 | -0.134343 | -0.467266  | BGIOSGA022370 | XP_006654726.1 putative aminoacrylate<br>hydrolase RuID isoform X1                                    |
| TCONS_00019720 | -0.311642 | -0.258883 | -0.532983  | BGIOSGA023241 | XP_004978487.1glutathione transferase GST 23                                                          |
| TCONS_00035495 | -0.311489 | -0.694994 | 0.433287   | BGIOSGA033337 | XP_004961358.1uncharacterized protein<br>LOC101762134                                                 |
| TCONS_00018230 | -0.311451 | -0.524605 | -0.0202868 | BGIOSGA020287 | XP_003565395.2probable calcium-binding<br>protein CML24                                               |
| TCONS_00024360 | -0.31142  | -1.32494  | -2.66519   | BGIOSGA030761 | XP_015693773.1 disease resistance protein<br>RGA2-like                                                |
| TCONS_00021217 | -0.311181 | -1.83788  | -1.68911   | BGIOSGA023439 | XP_021306094.1uncharacterized protein<br>LOC8064953                                                   |
| TCONS_00022871 | -0.311171 | -1.29608  | -2.21986   | BGIOSGA007489 | XP_006649631.1 digalactosyldiacylglycerol<br>synthase 2, chloroplastic-like                           |
| TCONS_00011788 | -0.311075 | -1.48199  | -0.742786  | BGIOSGA011035 | XP_006645146.1 ML0-like protein 1                                                                     |
| TCONS_00002310 | -0.311017 | -0.367474 | -0.912545  | BGIOSGA008421 | XP_006652299.1 golgin subfamily A member 6-<br>like protein 22                                        |
| TCONS_00015901 | -0.310825 | -0.645497 | 0.521608   | BGIOSGA015087 | XP_008665991.1ent-kaurenoic acid oxidase                                                              |
| TCONS_00032102 | -0.310681 | -1.10941  | -1.20825   | BGIOSGA031071 | XP_006649844.1 putative clathrin assembly<br>protein At2g25430                                        |
| TCONS_00011999 | -0.310402 | 0.174152  | 0.374844   | BGIOSGA000384 | XP_006654786.1 guanylate-binding protein 1                                                            |
| TCONS_00019796 | -0.310189 | 1.03787   | 0.826849   | BGIOSGA006622 |                                                                                                       |

transcriptome

|                |           |            |            |               |                                                                                              |
|----------------|-----------|------------|------------|---------------|----------------------------------------------------------------------------------------------|
| TCONS_00030051 | -0.310125 | -1.36473   | -2.67077   | BGIOSGA010627 | XP_006661234.1 probable WRKY transcription factor 60                                         |
| TCONS_00024178 | -0.310055 | 0.706961   | 0.407917   | BGIOSGA009949 | XP_002461092.1probable transcription factor At3g04930                                        |
| TCONS_00000870 | -0.309862 | 2.9011     | 1.91523    | BGIOSGA003424 | XP_015696817.1PREDICTED: uncharacterized protein LOC102718134, partial                       |
| TCONS_00035830 | -0.309701 | 0.644512   | 0.784327   | BGIOSGA037227 | XP_015698255.1PREDICTED: uncharacterized protein LOC102699363                                |
| TCONS_00023713 | -0.309554 | -1.03282   | -0.754505  | BGIOSGA018911 | XP_015695196.1 peptide-N(4)-(N-acetyl-beta-glucosaminy)asparagine amidase isoform X1         |
| TCONS_00030635 | -0.309386 | -1.6193    | -0.226321  | BGIOSGA032465 | XP_003573740.1uncharacterized protein LOC100843787 isoform X2                                |
| TCONS_00007130 | -0.309335 | -0.401558  | 0.741419   | BGIOSGA007020 | XP_006648143.1 ubiquitin carboxyl-terminal hydrolase 2 isoform X1                            |
| TCONS_00018903 | -0.309204 | 0.00401191 | -0.60835   | BGIOSGA018454 | XP_006645169.1 50S ribosomal protein L13                                                     |
| TCONS_00009610 | -0.309111 | 0.226686   | 0.335481   | BGIOSGA030546 | XP_006649661.1 wall-associated receptor kinase-like 14                                       |
| TCONS_00037313 | -0.309033 | -0.823393  | -0.605157  | BGIOSGA013803 | XP_006664082.1 golgin candidate 6                                                            |
| TCONS_00015151 | -0.308962 | -1.99229   | -0.415104  | BGIOSGA017331 | XP_008668661.1probable phytol kinase, chloroplastic isoform X1                               |
| TCONS_00011819 | -0.30889  | 0.959252   | 0.928594   | BGIOSGA031143 | XP_015697827.1 pentatricopeptide repeat-containing protein At5g47360                         |
| TCONS_00001445 | -0.30887  | -0.957786  | -1.27674   | BGIOSGA004092 | XP_015697684.1 carbonic anhydrase, chloroplastic-like isoform X1                             |
| TCONS_00009097 | -0.308587 | 0.233092   | 0.37858    | BGIOSGA033046 | XP_004954520.1large ribosomal RNA subunit accumulation protein YCED homolog 1, chloroplastic |
| TCONS_00006849 | -0.307869 | -0.214866  | -0.597488  | BGIOSGA003624 | XP_006647870.1 chaperone protein dnaJ 16-like                                                |
| TCONS_00000029 | -0.307793 | 0.819595   | 0.99727    | BGIOSGA006007 | XP_006646752.2 something about silencing protein 10-like                                     |
| TCONS_00008118 | -0.307766 | -0.38412   | 0.307295   | BGIOSGA004289 | XP_006647340.1 germin-like protein 2-4                                                       |
| TCONS_00019794 | -0.307677 | 0.17145    | -0.175007  | BGIOSGA004180 | XP_004961229.1homeobox-DDT domain protein RLT2                                               |
| TCONS_00009243 | -0.307585 | -0.0777196 | -0.138757  | BGIOSGA025787 | XP_014753056.1bromodomain-containing protein DDB_G0270170                                    |
| TCONS_00018038 | -0.307254 | 0.262811   | 0.466185   | BGIOSGA024731 | XP_006654566.1 type I inositol polyphosphate 5-phosphatase 10-like                           |
| TCONS_00019018 | -0.307201 | 1.19276    | -0.206816  | BGIOSGA019322 | XP_006655175.2 lysine-specific demethylase JMJ18-like                                        |
| TCONS_00007851 | -0.306883 | 0.122659   | -0.182259  | BGIOSGA006630 | XP_006648568.1 protein DEHYDRATION-INDUCED 19 homolog 4                                      |
| TCONS_00031730 | -0.306813 | -1.99901   | -0.600051  | BGIOSGA039447 | XP_006661603.1 protein NRT1/ PTR FAMILY 8.3-like                                             |
| TCONS_00010857 | -0.306771 | -0.249857  | 0.481602   | BGIOSGA015774 | XP_015691052.1 SWI/SNF complex subunit SWI3D-like                                            |
| TCONS_00006159 | -0.306734 | 0.886424   | 0.920497   | BGIOSGA000898 | XP_006647249.1 elongation factor 2-like                                                      |
| TCONS_00009428 | -0.306639 | 0.865249   | -0.105024  | BGIOSGA007130 | XP_006651097.1 serine/threonine-protein kinase At5g01020-like                                |
| TCONS_00025633 | -0.3066   | 0.883362   | 0.0675747  | BGIOSGA023793 | XP_002463309.2CTL-like protein DDB_G0274487                                                  |
| TCONS_00021358 | -0.30642  | -0.418945  | -0.263771  | BGIOSGA023586 | XP_006656477.1 F-box protein SKIP31                                                          |
| TCONS_00017162 | -0.306213 | 0.591119   | -0.0357403 | BGIOSGA014638 | XP_006654061.1 kinesin-13A                                                                   |
| TCONS_00019645 | -0.30618  | -0.521076  | 0.180058   | BGIOSGA017712 | XP_002441401.1probable peptidyl-tRNA hydrolase 2 isoform X2                                  |
| TCONS_00001239 | -0.30574  | 0.0947324  | 0.526627   | BGIOSGA036884 | XP_006644321.1 coiled-coil domain-containing protein 94 homolog                              |
| TCONS_00031602 | -0.305671 | -1.25179   | -2.11739   | BGIOSGA007713 | XP_006662580.1 proline dehydrogenase 2, mitochondrial-like                                   |
| TCONS_00032573 | -0.305554 | 0.88112    | -0.473599  | BGIOSGA025490 | XP_003574208.1mitochondrial import inner membrane translocase subunit TIM23-1                |
| TCONS_00035497 | -0.305387 | -2.95627   | -0.898012  | BGIOSGA022006 | XP_006663768.1 NAC transcription factor 29-like                                              |
| TCONS_00021668 | -0.305357 | 0.378378   | 1.01133    | #N/A          | #N/A                                                                                         |
| TCONS_00034469 | -0.305352 | 0.709425   | 0.200555   | BGIOSGA030880 | XP_006663277.1 protein disulfide isomerase-like 1-1                                          |
| TCONS_00022222 | -0.305203 | -0.688539  | -0.442715  | BGIOSGA021275 | XP_015693913.1 60S ribosomal protein L18a-like protein isoform X1                            |
| TCONS_00032625 | -0.305191 | -1.31059   | 0.529987   | BGIOSGA030813 | XP_010504143.1 histone H4                                                                    |
| TCONS_00017211 | -0.304982 | 2.60031    | 0.372957   | BGIOSGA006599 | XP_002439361.2universal stress protein PHOS32                                                |
| TCONS_00018266 | -0.304802 | 1.11466    | -0.212458  | BGIOSGA016888 | XP_004961312.1formin-like protein 18                                                         |
| TCONS_00006569 | -0.304731 | -2.04404   | -0.645787  | BGIOSGA030133 | XP_015689303.1 serine/threonine-protein kinase D6PK                                          |
| TCONS_00005799 | -0.304565 | -1.57459   | 0.186738   | BGIOSGA004144 | XP_010234116.2F-box/kelch-repeat protein At3g61590                                           |
| TCONS_00028370 | -0.304447 | 0.503798   | 0.271007   | BGIOSGA030132 | XP_006659589.1 60S ribosomal protein L17-like                                                |
| TCONS_00023532 | -0.304375 | 0.993829   | -0.419985  | BGIOSGA035871 | XP_015694830.1PREDICTED: uncharacterized protein LOC102711362 isoform X1                     |
| TCONS_00023242 | -0.304254 | -0.486898  | 0.183848   | BGIOSGA025283 | XP_006657510.2 ATP-dependent DNA helicase 2 subunit KU70                                     |
| TCONS_00017351 | -0.304213 | -0.070504  | -1.79891   | BGIOSGA019217 | XP_006654073.1 DNA-directed RNA polymerase V subunit 7-like                                  |
| TCONS_00019275 | -0.303853 | -1.18693   | -0.988958  | BGIOSGA018074 | XP_006655309.1 cytochrome P450 734A1-like                                                    |
| TCONS_00015750 | -0.303825 | -3.20849   | -2.79988   | BGIOSGA017685 | XP_003579586.1ER lumen protein-retaining receptor                                            |
| TCONS_00037376 | -0.303824 | -0.184353  | -0.56618   | BGIOSGA009643 | XP_015698426.1 GDSL esterase/lipase At4g28780-like                                           |
| TCONS_00021496 | -0.303768 | 1.31759    | 0.521819   | BGIOSGA003229 | XP_004964368.1 uncharacterized protein LOC101766488                                          |
| TCONS_00002915 | -0.303721 | -0.281663  | 0.225944   | BGIOSGA002305 | XP_006643802.1 protein RST1                                                                  |
| TCONS_00014189 | -0.303689 | -0.538704  | 0.130682   | BGIOSGA016344 | XP_006652253.1 histone deacetylase 9                                                         |
| TCONS_00030787 | -0.303677 | -0.383143  | 0.401085   | BGIOSGA012238 | XP_006661660.1 chloride conductance regulatory protein ICl <sub>n</sub>                      |



transcriptome

|                |           |            |            |               |                                                                                |
|----------------|-----------|------------|------------|---------------|--------------------------------------------------------------------------------|
| TCONS_00008925 | -0.303506 | -0.326442  | -0.0894918 | BGIOSGA000593 | XP_006649101.1PREDICTED: uncharacterized protein LOC102722745, partial         |
| TCONS_00029087 | -0.303432 | 0.530662   | -0.453042  | BGIOSGA030663 | XP_004956927.1exocyst complex component EXO70B1                                |
| TCONS_00034774 | -0.303394 | -0.418958  | 0.783994   | BGIOSGA009845 | XP_006663399.1 magnesium-dependent phosphatase 1-like                          |
| TCONS_00033381 | -0.303334 | 1.21288    | -0.231832  | BGIOSGA028843 | XP_004979229.1protein transport protein SEC23                                  |
| TCONS_00001459 | -0.303308 | -1.60119   | -2.12403   | BGIOSGA004100 | XP_006644431.1 probable sodium/metabolite cotransporter BASS2, chloroplastic   |
| TCONS_00020151 | -0.303089 | 0.263692   | 0.240035   | BGIOSGA018639 | XP_006655808.1 probable beta-1,3-galactosyltransferase 14                      |
| TCONS_00007502 | -0.303027 | -0.15208   | -0.464942  | BGIOSGA004783 | XP_015688487.1 putative multidrug resistance protein                           |
| TCONS_00009629 | -0.302821 | -1.41313   | -1.78406   | BGIOSGA013495 | XP_006649675.1 inositol-tetrakisphosphate 1-kinase 2 isoform X1                |
| TCONS_00001911 | -0.302757 | -1.19466   | -0.380568  | BGIOSGA012263 | XP_015697834.1 myosin-binding protein 1-like                                   |
| TCONS_00022932 | -0.302667 | -0.043967  | -1.00929   | BGIOSGA020513 | XP_015694211.1 DDB1- and CUL4-associated factor 8                              |
| TCONS_00010024 | -0.302418 | -0.187106  | 0.529308   | BGIOSGA012578 | XP_006651351.2 nardilysin                                                      |
| TCONS_00022350 | -0.302346 | 0.172366   | 0.437368   | BGIOSGA004003 | XP_021305342.1DEAD-box ATP-dependent RNA helicase 31                           |
| TCONS_00009619 | -0.302316 | -0.574676  | 0.0789409  | BGIOSGA012164 | XP_006649667.1 DNA polymerase I isoform X1                                     |
| TCONS_00031588 | -0.30213  | -0.183135  | -0.148243  | BGIOSGA014016 | XP_006662571.1 syndetin                                                        |
| TCONS_00009422 | -0.301916 | 0.957032   | 0.649439   | BGIOSGA011972 | XP_006649494.1 elongation factor 1-alpha                                       |
| TCONS_00001525 | -0.301878 | -0.786     | -0.442215  | BGIOSGA004156 | XP_006646179.1 carboxyl-terminal-processing peptidase 1, chloroplastic         |
| TCONS_00021437 | -0.301875 | -0.61815   | -0.804795  | BGIOSGA027623 | XP_010228157.1protein NTM1-like 9                                              |
| TCONS_00018400 | -0.301852 | 0.110944   | -0.667333  | BGIOSGA020452 | NP_001278572.1harpin-induced protein                                           |
| TCONS_00033153 | -0.30172  | 0.261001   | 0.351791   | BGIOSGA034338 | XP_006662811.1 transcriptional corepressor SEUSS                               |
| TCONS_00011275 | -0.301702 | #N/A       | -0.635286  | BGIOSGA019760 | XP_006645841.2 probable glycerol-3-phosphate acyltransferase 3                 |
| TCONS_00034156 | -0.301593 | -1.93031   | 2.96617    | BGIOSGA007029 | XP_006663738.1 CBL-interacting protein kinase 15                               |
| TCONS_00003998 | -0.301563 | -0.223887  | 0.426457   | BGIOSGA026927 | XP_015697870.1 polypyrimidine tract-binding protein homolog 1-like             |
| TCONS_00025065 | -0.301562 | -0.605284  | -0.259278  | BGIOSGA012735 | XP_006658541.1PREDICTED: uncharacterized protein LOC102711548                  |
| TCONS_00019442 | -0.301428 | -0.772457  | -0.303395  | BGIOSGA008732 | XP_006654518.1 ras-related protein RAB1c                                       |
| TCONS_00022317 | -0.301411 | 0.334271   | 0.224941   | BGIOSGA039058 | XP_003558495.1probable methionine-tRNA ligase                                  |
| TCONS_00006274 | -0.301346 | 0.413612   | 1.06661    | BGIOSGA001181 | XP_015689141.1 molybdopterin synthase sulfur carrier subunit                   |
| TCONS_00025934 | -0.301304 | 0.573697   | 0.733433   | BGIOSGA028007 | XP_004972817.1sm-like protein LSM2                                             |
| TCONS_00005560 | -0.301237 | 0.685478   | 0.138484   | BGIOSGA028355 | XP_006646980.1 cinnamoyl-CoA reductase 2-like                                  |
| TCONS_00013139 | -0.301169 | -0.417773  | -0.378854  | BGIOSGA009846 | XP_015690983.1 E3 ubiquitin-protein ligase HOS1 isoform X3                     |
| TCONS_00008997 | -0.300953 | 0.00218289 | -0.983942  | BGIOSGA022382 | XP_006648071.1 AP-1 complex subunit gamma-2-like                               |
| TCONS_00020629 | -0.300858 | 0.569117   | -0.0524337 | BGIOSGA022811 | XP_006656042.1PREDICTED: uncharacterized protein At2g39795, mitochondrial-like |
| TCONS_00027015 | -0.300685 | -1.45993   | -0.679574  | BGIOSGA034765 | XP_006659636.1PREDICTED: uncharacterized protein LOC102704999 isoform X2       |
| TCONS_00016230 | -0.300638 | -0.619546  | -0.53775   | BGIOSGA014744 | XP_006653591.1 endoribonuclease Dicer homolog 4 isoform X1                     |
| TCONS_00010143 | -0.300499 | -1.33273   | -0.56818   | BGIOSGA030711 | XP_015691200.1 pyrrolidone-carboxylate peptidase-like                          |
| TCONS_00010762 | -0.300483 | 0.778373   | 0.344545   | BGIOSGA037475 | XP_006651722.2 zinc finger CCH domain-containing protein 24                    |
| TCONS_00002607 | -0.300019 | -0.936669  | -0.749676  | BGIOSGA030372 | XP_006645342.1 beta-fructofuranosidase, insoluble isoenzyme 4 isoform X1       |
| TCONS_00010978 | -0.299725 | -0.473613  | -0.047158  | BGIOSGA013581 | XP_021304987.1cleavage stimulation factor subunit 50                           |
| TCONS_00037176 | -0.299104 | -1.2518    | -3.39838   | BGIOSGA019551 | XP_006654233.1 high-light-induced protein, chloroplastic                       |
| TCONS_00030390 | -0.299048 | -2.19958   | -0.140591  | BGIOSGA029409 | XP_006660863.1 E3 ubiquitin ligase BIG                                         |
| TCONS_00023998 | -0.299023 | 0.31665    | -0.196145  | #N/A          | BROTHER-like                                                                   |
| TCONS_00032450 | -0.298999 | -0.327064  | -0.046416  | BGIOSGA031689 | XP_015697175.1PREDICTED: uncharacterized protein LOC102701300                  |
| TCONS_00005116 | -0.298882 | 1.18276    | -0.101712  | BGIOSGA029456 | XP_006645376.1 non-specific phospholipase C2-like                              |
| TCONS_00031639 | -0.298837 | -0.140794  | -0.305395  | BGIOSGA014171 | XP_003574347.1trihelix transcription factor ASIL2                              |
| TCONS_00017678 | -0.298814 | -1.08237   | -0.868994  | BGIOSGA021098 | XP_006654323.1PREDICTED: uncharacterized protein LOC102706193                  |
| TCONS_00000114 | -0.298666 | 0.0826444  | -0.156665  | BGIOSGA002684 | XP_006643704.1 probable ubiquitin-conjugating enzyme E2 23 isoform X2          |
| TCONS_00035767 | -0.29864  | -2.84307   | -5.31534   | BGIOSGA034194 | XP_006664438.1 2-alkenal reductase (NADP(+)-dependent)-like                    |
| TCONS_00028431 | -0.298631 | -4.70413   | -0.470523  | BGIOSGA031126 | XP_015696048.1 kinesin-like protein NACK2 isoform X1                           |
| TCONS_00016612 | -0.298579 | 0.162666   | -0.592321  | BGIOSGA013371 | XP_015695774.1 50S ribosomal protein L18                                       |
| TCONS_00029802 | -0.298524 | 0.468003   | -0.0688973 | BGIOSGA030017 | XP_006661108.1 disease resistance protein RGA2-like                            |
| TCONS_00000525 | -0.298516 | -0.0991838 | -0.435091  | BGIOSGA018990 | NP_001146919.1OB-fold nucleic acid binding domain containing protein           |
| TCONS_00011111 | -0.298341 | -0.127615  | 1.12873    | BGIOSGA000770 | XP_006651895.2 probable zinc metalloprotease EGY1, chloroplastic               |
| TCONS_00027351 | -0.298339 | 0.667221   | 0.140605   | BGIOSGA027647 | XP_006659835.2 transmembrane protein 120 homolog                               |
| TCONS_00005223 | -0.298302 | #N/A       | -1.8317    | #N/A          | #N/A                                                                           |

transcriptome

|                |           |            |            |               |                                                                                                     |
|----------------|-----------|------------|------------|---------------|-----------------------------------------------------------------------------------------------------|
| TCONS_00024486 | -0.29825  | -1.75155   | 0.32323    | BGIOSGA002144 | XP_006658233.1PREDICTED: uncharacterized protein LOC102719504                                       |
| TCONS_00034584 | -0.298208 | -0.967659  | 0.140282   | BGIOSGA025264 | XP_002449290.1probable carboxylesterase 18                                                          |
| TCONS_00005309 | -0.297966 | 1.17772    | 0.361627   | BGIOSGA025075 | XP_006648257.1 eukaryotic translation initiation factor 3 subunit C-like                            |
| TCONS_00034953 | -0.297878 | 0.675824   | 0.0178432  | BGIOSGA023559 | XP_015697998.1 auxin response factor 23                                                             |
| TCONS_00015469 | -0.297502 | -0.498178  | -0.499599  | BGIOSGA015547 | XP_006652119.1 vacuolar protein-sorting-associated protein 33 homolog                               |
| TCONS_00004694 | -0.297471 | -4.63155   | -1.90885   | BGIOSGA029235 | XP_002458734.1protein UPSTREAM OF FLC                                                               |
| TCONS_00028414 | -0.297174 | -0.0616341 | -0.317165  | BGIOSGA026546 | XP_006659651.1 probable protein NAP1                                                                |
| TCONS_00018244 | -0.297131 | 1.91234    | 1.13761    | BGIOSGA019910 | XP_015693381.1 FHA domain-containing protein DDL                                                    |
| TCONS_00001009 | -0.296907 | -0.271886  | -0.686935  | BGIOSGA011424 | XP_006644215.1 heavy metal-associated isoprenylated plant protein 26-like                           |
| TCONS_00016752 | -0.296878 | -0.047335  | -0.116769  | BGIOSGA014206 | XP_006653829.1 small RNA degrading nuclease 1-like isoform X1                                       |
| TCONS_00025719 | -0.296847 | 0.472      | 0.0896054  | BGIOSGA010812 | XP_015694772.1 probable apyrase 2                                                                   |
| TCONS_00037557 | -0.296813 | 0.666815   | 1.01453    | BGIOSGA031853 | XP_006664762.1 cationic amino acid transporter 2, vacuolar-like                                     |
| TCONS_00000531 | -0.296775 | -0.0603707 | 0.317749   | BGIOSGA037794 | XP_006643977.1 receptor-like protein kinase HSL1                                                    |
| TCONS_00021193 | -0.296623 | -0.510733  | -0.109248  | BGIOSGA018533 | XP_006656323.1 glutaredoxin-C8                                                                      |
| TCONS_00018655 | -0.296519 | -0.088428  | -0.294534  | BGIOSGA009973 | XP_006654065.1 probable ethylene response sensor 2                                                  |
| TCONS_00015359 | -0.296233 | 0.0549477  | -0.233841  | BGIOSGA015617 | XP_006652099.1 AT-rich interactive domain-containing protein 2-like                                 |
| TCONS_00010022 | -0.296182 | 1.36683    | 0.144545   | BGIOSGA015296 | XP_006651349.1 pentatricopeptide repeat-containing protein At1g09900-like                           |
| TCONS_00028944 | -0.296175 | 0.159014   | -0.121216  | BGIOSGA035892 | XP_002460179.1uncharacterized protein LOC8055789                                                    |
| TCONS_00006599 | -0.296157 | 0.247722   | 0.152911   | BGIOSGA012246 | XP_006662433.2 UDP-glucose:glycoprotein glucosyltransferase                                         |
| TCONS_00011476 | -0.296048 | 0.221948   | -0.0480269 | BGIOSGA011549 | XP_006649305.1 50S ribosomal protein L5, chloroplastic                                              |
| TCONS_00027007 | -0.29574  | -0.897284  | 0.462153   | BGIOSGA030107 | XP_015690801.1PREDICTED: uncharacterized protein LOC102721819 isoform X1                            |
| TCONS_00007006 | -0.295725 | -0.0894248 | -2.49813   | BGIOSGA007661 | XP_015689520.1 serine/threonine-protein kinase fray2 isoform X2                                     |
| TCONS_00038376 | -0.295701 | -0.685542  | -0.584138  | BGIOSGA032568 | XP_022684857.1disease resistance protein RPM1                                                       |
| TCONS_00002065 | -0.295632 | -1.34436   | -0.597893  | BGIOSGA006347 | XP_006644911.1 probable inactive receptor kinase At5g58300                                          |
| TCONS_00005481 | -0.295377 | -1.35916   | -0.352238  | BGIOSGA018032 | XP_006648341.1PREDICTED: uncharacterized protein LOC102715370                                       |
| TCONS_00000978 | -0.295053 | -1.1463    | -0.181066  | BGIOSGA003581 | XP_015697898.1 piezo-type mechanosensitive ion channel homolog isoform X3                           |
| TCONS_00009266 | -0.294724 | 0.109992   | 0.486663   | BGIOSGA011803 | XP_006649356.1 24-methylenesterol C-methyltransferase 2                                             |
| TCONS_00002230 | -0.294638 | 0.289358   | 0.0497079  | BGIOSGA027835 | XP_015688049.1 tubby-like F-box protein 3                                                           |
| TCONS_00000823 | -0.294578 | -4.75974   | -1.51105   | BGIOSGA000357 | XP_015688480.1 GDSL esterase/lipase At1g09390-like                                                  |
| TCONS_00002711 | -0.294163 | -0.229108  | -1.37651   | BGIOSGA012967 | XP_006645443.1 glycerophosphodiester phosphodiesterase protein kinase domain-containing GDPDL2-like |
| TCONS_00026415 | -0.293753 | 0.0969404  | -0.056373  | BGIOSGA003622 | XP_015695946.1 protein ENHANCED DOWNY MILDEW 2-like isoform X2                                      |
| TCONS_00016932 | -0.2937   | -1.30281   | -0.218597  | BGIOSGA020488 | XP_006653081.1 UDP-galactose transporter 1-like                                                     |
| TCONS_00032986 | -0.293579 | 0.240187   | -0.133753  | BGIOSGA012081 | XP_006662741.1 ribonuclease H2 subunit A isoform X1                                                 |
| TCONS_00004558 | -0.293473 | -1.06215   | -0.184206  | BGIOSGA020111 | XP_006644841.1 putative E3 ubiquitin-protein ligase RING1a                                          |
| TCONS_00004508 | -0.293451 | 0.303867   | -0.388474  | BGIOSGA028097 | XP_015699033.1 helicase-like transcription factor CHR28 isoform X1                                  |
| TCONS_00008070 | -0.29344  | -0.811351  | -0.378646  | BGIOSGA006382 | XP_0156889579.1 RING finger protein 10                                                              |
| TCONS_00001988 | -0.293324 | -2.99639   | -2.70743   | BGIOSGA004624 | XP_015693543.1 nucleotide pyrophosphatase/phosphodiesterase-like                                    |
| TCONS_00005735 | -0.293213 | -0.91346   | -1.51443   | BGIOSGA021073 | XP_003572164.1berberine bridge enzyme-like 23                                                       |
| TCONS_00004946 | -0.293179 | -0.48983   | 0.156215   | BGIOSGA000275 | NP_001132810.2putative ACR family protein                                                           |
| TCONS_00031384 | -0.293155 | -0.144518  | -0.0107412 | BGIOSGA033196 | XP_006662473.1 E3 ubiquitin-protein ligase Hakai                                                    |
| TCONS_00019819 | -0.293122 | -1.43527   | -0.148654  | BGIOSGA007532 | XP_006647563.1PREDICTED: uncharacterized protein LOC102699931                                       |
| TCONS_00010926 | -0.293115 | 0.68451    | 0.700535   | BGIOSGA024007 | XP_015691263.1 protein WRKY1-like                                                                   |
| TCONS_00030687 | -0.293089 | 1.03839    | 1.83279    | BGIOSGA017121 | XP_015696420.1 phospholipase A(1) LCAT3                                                             |
| TCONS_00018634 | -0.292908 | -1.84999   | -0.939058  | BGIOSGA022793 | XP_006654045.1 sodium/hydrogen exchanger 2-like                                                     |
| TCONS_00015523 | -0.292798 | 0.415024   | -0.162716  | BGIOSGA015458 | XP_006652142.1 ER membrane protein complex subunit 8/9 homolog                                      |
| TCONS_00009577 | -0.292601 | 0.180704   | -0.415826  | BGIOSGA012128 | XP_006649644.1 protein OBERON 4-like                                                                |
| TCONS_00020512 | -0.292516 | -0.566922  | -0.771531  | BGIOSGA006821 | XP_004965216.1LRR receptor kinase SERL2                                                             |
| TCONS_00027249 | -0.292513 | -0.335803  | 0.276035   | BGIOSGA027752 | XP_014756366.1putative vacuolar protein sorting-associated protein 13A isoform X1                   |
| TCONS_00020766 | -0.292461 | -0.689279  | 0.176003   | BGIOSGA022964 | NP_001149074.1nucleic acid binding protein                                                          |
| TCONS_00013938 | -0.29243  | -0.411727  | 0.165076   | BGIOSGA008711 | XP_015692250.1 dnaJ protein ERDJ2A                                                                  |
| TCONS_00002476 | -0.292421 | -1.5792    | -0.71855   | BGIOSGA005120 | XP_006646654.1 psbP domain-containing protein 7, chloroplastic                                      |
| TCONS_00004573 | -0.292381 | 0.951393   | -0.154011  | BGIOSGA000641 | XP_006644853.2PREDICTED: uncharacterized protein LOC102712310                                       |
| TCONS_00007769 | -0.292029 | -0.254119  | 0.962705   | BGIOSGA024573 | XP_006647152.1 uridine kinase-like protein 3                                                        |
| TCONS_00006142 | -0.292023 | -0.0588389 | -0.719762  | BGIOSGA033105 | XP_006648669.2 serine/threonine-protein kinase CDL1                                                 |
| TCONS_00015845 | -0.291882 | -0.990935  | -1.95829   | BGIOSGA020506 | XP_015692161.1 1,4-alpha-glucan-branching enzyme 1, chloroplastic/amyloplastic-like                 |

transcriptome

|                |           |            |            |              |                                                                                                        |
|----------------|-----------|------------|------------|--------------|--------------------------------------------------------------------------------------------------------|
| TCONS_00029355 | -0.291478 | -1.32839   | #NA        | BGOSGA031104 | XP_022679765.1cytochrome c oxidase assembly factor 5                                                   |
| TCONS_00008349 | -0.291417 | 0.0102634  | 0.198105   | BGOSGA014801 | XP_021303370.1LETM1 and EF-hand domain-containing protein 1, mitochondrial                             |
| TCONS_00013280 | -0.291415 | -0.643377  | -0.466068  | BGOSGA024824 | XP_006651884.2 WPP domain-associated protein-like                                                      |
| TCONS_00011682 | -0.291368 | -1.41497   | 0.51157    | BGOSGA011327 | XP_015696269.1 SAP-like protein BP-73                                                                  |
| TCONS_00014308 | -0.291348 | -1.21514   | -1.37462   | BGOSGA015027 | XP_006652319.2PREDICTED: uncharacterized protein LOC102718642 isoform X1                               |
| TCONS_00005527 | -0.291341 | 0.116366   | 0.866173   | BGOSGA007636 | XP_015689414.1 cytochrome P450 97B2, chloroplastic                                                     |
| TCONS_00032634 | -0.29118  | 0.958202   | 0.144434   | BGOSGA015170 | XP_015691446.1 ubiquitin domain-containing protein DSK2a-like                                          |
| TCONS_00017416 | -0.29105  | -1.45186   | 0.338163   | BGOSGA035852 | XP_015693281.1 probable LRR receptor-like serine/threonine-protein kinase At1g56140                    |
| TCONS_00016194 | -0.290943 | -0.763135  | -0.625724  | BGOSGA006057 | XP_009390559.1 BTB/POZ domain-containing protein At2g24240                                             |
| TCONS_00028257 | -0.290637 | 0.695225   | 0.139485   | BGOSGA026721 | XP_006659561.1 serine-glyoxylate aminotransferase                                                      |
| TCONS_00002156 | -0.290546 | 0.609604   | 0.914232   | BGOSGA009303 | XP_006644998.1 pumilio homolog 1-like isoform X1                                                       |
| TCONS_00030133 | -0.290459 | 0.310197   | -0.0263708 | BGOSGA031979 | XP_022680184.1 mitochondrial substrate carrier family protein J-like                                   |
| TCONS_00022543 | -0.290441 | -0.940146  | -0.313306  | BGOSGA010699 | XP_006656239.1PREDICTED: uncharacterized protein LOC102719683                                          |
| TCONS_00003209 | -0.290275 | 0.826766   | 0.270657   | BGOSGA002008 | XP_015699249.1 probable histone acetyltransferase HAC-like 3 isoform X3                                |
| TCONS_00024930 | -0.290035 | -1.10908   | 0.287719   | BGOSGA024456 | XP_010231242.14-hydroxyphenylacetaldehyde oxime monooxygenase                                          |
| TCONS_00013319 | -0.290024 | 0.392816   | -0.486601  | BGOSGA009665 | XP_006651897.1 replication factor C subunit 5                                                          |
| TCONS_00026027 | -0.289874 | 0.669094   | 1.84771    | #N/A         | #N/A                                                                                                   |
| TCONS_00018281 | -0.289786 | -0.649111  | -1.72812   | BGOSGA001019 | NP_001339548.1uncharacterized LOC100273076                                                             |
| TCONS_00028325 | -0.28954  | -0.954828  | -0.794703  | BGOSGA026646 | XP_006659603.1PREDICTED: uncharacterized protein LOC102719139                                          |
| TCONS_00022697 | -0.289164 | -0.962497  | -4.09964   | BGOSGA020744 | XP_002438796.1cryptochrome DASH, chloroplastic/mitochondrial                                           |
| TCONS_00024089 | -0.289126 | 1.23431    | 0.78007    | BGOSGA036025 | XP_015695366.1 exportin-T                                                                              |
| TCONS_00007790 | -0.288675 | 0.137473   | -0.57293   | BGOSGA034263 | XP_006655122.1 disease resistance protein RPP13-like                                                   |
| TCONS_00003312 | -0.288572 | 0.0427182  | 0.174192   | BGOSGA000610 | XP_006644054.1 60S ribosomal protein L30 isoform X1                                                    |
| TCONS_00006100 | -0.288482 | 0.448821   | 0.239539   | BGOSGA033107 | XP_022679774.1uncharacterized protein LOC101754006                                                     |
| TCONS_00004483 | -0.288373 | 0.249838   | 0.0786545  | BGOSGA033768 | XP_015699161.1 ubiquitin carboxyl-terminal hydrolase 13-like isoform X2                                |
| TCONS_00008214 | -0.288131 | 0.371758   | -0.201903  | BGOSGA029631 | XP_003575194.1probable protein phosphatase 2C 15                                                       |
| TCONS_00019431 | -0.288116 | -1.34066   | 0.067494   | BGOSGA017922 | XP_015692742.1PREDICTED: uncharacterized protein LOC102711533                                          |
| TCONS_00006193 | -0.28803  | -0.408344  | 0.137609   | BGOSGA033294 | XP_006648690.1PREDICTED: uncharacterized protein LOC102707561                                          |
| TCONS_00017845 | -0.287532 | 0.664469   | 0.63831    | BGOSGA000382 | XP_006654426.1 F-box protein SKP2A-like                                                                |
| TCONS_00001749 | -0.287522 | -0.986555  | -0.0759007 | BGOSGA017230 | XP_015693009.1PREDICTED: LOW QUALITY PROTEIN: uncharacterized protein LOC102722719                     |
| TCONS_00028102 | -0.287017 | 0.0601951  | -0.179042  | BGOSGA029700 | XP_012702565.1AT-rich interactive domain-containing protein 4 isoform X1                               |
| TCONS_00027365 | -0.286926 | 0.260621   | 0.978096   | BGOSGA027637 | XP_006659126.1 U3 small nucleolar ribonucleoprotein protein IMP4                                       |
| TCONS_00003471 | -0.286876 | -0.414496  | -0.505035  | BGOSGA022582 | XP_015699345.1 dihydrolipoyl dehydrogenase 1, mitochondrial-like                                       |
| TCONS_00021281 | -0.286793 | -0.0137324 | -0.0529045 | #N/A         | #N/A                                                                                                   |
| TCONS_00027268 | -0.286613 | 0.0793024  | -0.201046  | BGOSGA020329 | XP_006659077.1 serine/threonine protein phosphatase 2A 57 kDa regulatory subunit B' theta isoform-like |
| TCONS_00000782 | -0.286207 | 0.0438713  | -0.421912  | BGOSGA003379 | XP_006645823.2 aarF domain-containing protein kinase 4                                                 |
| TCONS_00024299 | -0.28613  | -0.974902  | 0.155317   | BGOSGA038680 | XP_004958606.1momilactone A synthase                                                                   |
| TCONS_00034560 | -0.285967 | -0.878892  | -0.786193  | BGOSGA027332 | XP_021317317.1disease resistance protein RPM1                                                          |
| TCONS_00028073 | -0.285377 | 0.876978   | -0.0880561 | BGOSGA014531 | XP_006659447.1 stromal cell-derived factor 2-like protein                                              |
| TCONS_00027461 | -0.285354 | -0.81646   | -0.790108  | BGOSGA017202 | XP_006659180.1 diacylglycerol kinase 5-like                                                            |
| TCONS_00014824 | -0.285348 | -0.562483  | -0.728475  | BGOSGA016995 | XP_015692223.1PREDICTED: uncharacterized protein LOC102716679                                          |
| TCONS_00021322 | -0.28528  | -0.364467  | 0.237633   | BGOSGA023552 | XP_015693697.1 subtilisin-like protease SBT2.6                                                         |
| TCONS_00008913 | -0.285222 | 0.167181   | -0.132877  | BGOSGA005496 | XP_015689363.1PREDICTED: uncharacterized protein LOC102708496 isoform X1                               |
| TCONS_00028453 | -0.285186 | 0.657333   | 0.19955    | BGOSGA024746 | XP_006659679.1PREDICTED: uncharacterized protein LOC102717458                                          |
| TCONS_00020334 | -0.285162 | -1.4738    | -0.224581  | BGOSGA007258 | XP_006655900.1 WAT1-related protein At1g21890-like                                                     |
| TCONS_00013642 | -0.284822 | 0.328644   | -0.440466  | BGOSGA012717 | XP_006653119.2 pentatricopeptide repeat-containing protein At3g57430, chloroplastic                    |
| TCONS_00008036 | -0.284774 | -0.499937  | 0.22743    | BGOSGA030977 | XP_006648647.1 galacturonosyltransferase 8                                                             |
| TCONS_00027205 | -0.284693 | -0.250743  | -1.61386   | BGOSGA014032 | XP_006659027.1 UDP-galactose transporter 1-like                                                        |
| TCONS_00009823 | -0.284491 | 0.328307   | -0.580958  | BGOSGA018909 | XP_006651269.1 probable sugar phosphate/phosphate translocator At3g11320                               |
| TCONS_00019861 | -0.28416  | 0.162486   | 0.64995    | BGOSGA037752 | XP_006654831.1 serine/threonine-protein kinase HT1-like                                                |
| TCONS_00035074 | -0.284042 | -1.21121   | -0.91874   | BGOSGA009680 | XP_006662974.1 E3 ubiquitin-protein ligase RHF2A                                                       |
| TCONS_00021541 | -0.283976 | 1.1899     | -0.576842  | BGOSGA022009 | XP_004964428.1histone H1                                                                               |

transcriptome

| TCONS_ID       | Value 1   | Value 2    | Value 3    | Gene          | Description                                                                          |
|----------------|-----------|------------|------------|---------------|--------------------------------------------------------------------------------------|
| TCONS_00032172 | -0.283891 | -0.340022  | 0.454602   | #N/A          | #N/A                                                                                 |
| TCONS_00007819 | -0.283781 | -0.151145  | -0.361989  | BGIOSGA006667 | XP_006647180.1 dipeptidyl aminopeptidase 4                                           |
| TCONS_00017210 | -0.283747 | -0.596383  | -0.198315  | BGIOSGA019255 | XP_015692888.1 probable LRR receptor-like serine/threonine-protein kinase At4g26540  |
| TCONS_00009345 | -0.283653 | 0.498022   | 0.536723   | BGIOSGA020760 | XP_015691094.1 la-related protein 1B-like                                            |
| TCONS_00003895 | -0.283583 | 0.165423   | -0.550238  | BGIOSGA000917 | XP_006646048.1 mitochondrial outer membrane protein porin 3                          |
| TCONS_00012867 | -0.283361 | 0.0437796  | 0.235189   | BGIOSGA028779 | XP_002464123.1 protein VASP homolog                                                  |
| TCONS_00026248 | -0.283295 | -1.45273   | -1.04508   | BGIOSGA028327 | XP_006659266.1 lactation elevated protein 1-like                                     |
| TCONS_00015786 | -0.283269 | -1.66057   | -1.49761   | BGIOSGA006404 | XP_002447708.1U6 snRNA-associated Sm-like protein LSm6                               |
| TCONS_00032838 | -0.283058 | -1.7698    | -1.36717   | BGIOSGA023719 | XP_006662662.1 peroxidase 4-like                                                     |
| TCONS_00010778 | -0.283057 | 0.590472   | 0.209898   | BGIOSGA019747 | XP_006650459.1 eukaryotic peptide chain release factor subunit 1-3                   |
| TCONS_00002458 | -0.28301  | 0.815098   | 0.14729    | BGIOSGA005102 | XP_015688251.1 unconventional prefoldin RPB5 interactor 1                            |
| TCONS_00014130 | -0.282795 | 0.00422253 | -0.393514  | BGIOSGA037505 | XP_008798980.1 probable metal-nicotianamine transporter YSL6                         |
| TCONS_00009405 | -0.28252  | -0.67911   | -0.368206  | BGIOSGA031966 | XP_004985529.1 uncharacterized protein LOC101762981                                  |
| TCONS_00014602 | -0.28246  | 0.265144   | 0.114932   | BGIOSGA008647 | XP_006653601.1 inositol phosphoglyceramide glucuronosyltransferase 1-like            |
| TCONS_00020612 | -0.282332 | -0.209364  | 0.586924   | BGIOSGA022796 | XP_006654192.1 nuclear poly(A) polymerase 1-like                                     |
| TCONS_00022852 | -0.282238 | 0.555689   | -0.0514523 | BGIOSGA000187 | XP_006656439.2 26S proteasome non-ATPase regulatory subunit 2 homolog A-like         |
| TCONS_00025006 | -0.282182 | 0.465931   | 0.218789   | BGIOSGA024393 | XP_003563194.1ankyrin repeat domain-containing protein 13B                           |
| TCONS_00029648 | -0.282176 | -0.38725   | -0.253688  | BGIOSGA030171 | XP_015696271.1 auxin transport protein BIG                                           |
| TCONS_00007523 | -0.282162 | 0.111339   | 0.0724074  | BGIOSGA037972 | XP_021314179.1citrate synthase 4, mitochondrial                                      |
| TCONS_00002624 | -0.28203  | -0.636041  | -1.2589    | BGIOSGA019023 | XP_006645332.2 protein DEHYDRATION-INDUCED 19 homolog 5                              |
| TCONS_00015022 | -0.281984 | 1.00712    | 0.286318   | BGIOSGA035948 | XP_006652884.1 probable galacturonosyltransferase 10                                 |
| TCONS_00014991 | -0.281905 | -0.45907   | -0.214777  | BGIOSGA007819 | XP_006652858.2PREDICTED: uncharacterized protein LOC102713621                        |
| TCONS_00025448 | -0.28178  | 0.378186   | 0.362752   | BGIOSGA023981 | XP_002463116.1aspartic proteinase CDR1                                               |
| TCONS_00018579 | -0.281457 | -1.25652   | -1.60192   | BGIOSGA001476 | XP_006654967.1 CBL-interacting protein kinase 17                                     |
| TCONS_00027817 | -0.281436 | 0.0207107  | 0.493882   | BGIOSGA027185 | XP_006659298.1 nuclear inhibitor of protein phosphatase 1                            |
| TCONS_00000777 | -0.28133  | -0.547652  | -0.798004  | BGIOSGA019714 | XP_006644124.1PREDICTED: uncharacterized protein LOC102706140                        |
| TCONS_00029375 | -0.281184 | 0.356409   | 0.447949   | BGIOSGA031127 | XP_003578489.130S ribosomal protein S31, mitochondrial                               |
| TCONS_00004624 | -0.281043 | -1.1436    | 0.0459037  | BGIOSGA005483 | XP_015688199.1PREDICTED: uncharacterized protein LOC102699464                        |
| TCONS_00003260 | -0.280966 | -0.16296   | -0.0991502 | BGIOSGA001955 | XP_006644015.1 FAD synthase-like                                                     |
| TCONS_00014583 | -0.280792 | 0.424416   | -2.57021   | BGIOSGA019047 | XP_006652500.1 ammonium transporter 1 member 1                                       |
| TCONS_00012884 | -0.280749 | -0.622381  | -0.312907  | BGIOSGA025119 | XP_015691087.1 switch-associated protein 70-like                                     |
| TCONS_00034386 | -0.280702 | 0.589801   | 0.750379   | BGIOSGA034420 | XP_010237897.2integrator complex subunit 3                                           |
| TCONS_00014481 | -0.280602 | 1.45221    | 0.280705   | BGIOSGA020627 | XP_006653547.1 probable inactive receptor kinase At1g27190                           |
| TCONS_00024340 | -0.280446 | -0.154698  | 0.735016   | BGIOSGA026381 | XP_006658117.1 probable acyl-CoA dehydrogenase IBR3                                  |
| TCONS_00020703 | -0.280268 | -0.476771  | -0.414942  | BGIOSGA040525 | XP_006656078.2 1,4-alpha-glucan-branching enzyme 3, chloroplastic/amyloplastic       |
| TCONS_00031065 | -0.280141 | 0.231955   | -0.413461  | BGIOSGA036737 | XP_006661758.1 protein kinase 2B, chloroplastic                                      |
| TCONS_00023900 | -0.280124 | -0.164938  | -0.68867   | BGIOSGA037599 | XP_006657823.1 cytochrome b6-f complex iron-sulfur subunit, chloroplastic            |
| TCONS_00001222 | -0.279949 | 0.259244   | 0.660027   | BGIOSGA003850 | XP_006646040.2 small subunit processome component 20 homolog                         |
| TCONS_00022051 | -0.279821 | 0.0641621  | 0.0989053  | BGIOSGA021465 | XP_006655996.1 importin-9                                                            |
| TCONS_00009108 | -0.279426 | -0.254678  | 0.0337233  | BGIOSGA006186 | XP_006648186.1 protein FD-like                                                       |
| TCONS_00030863 | -0.279394 | 0.563524   | -0.478513  | BGIOSGA014527 | XP_006662259.1 protein DETOXIFICATION 42-like                                        |
| TCONS_00016085 | -0.279362 | -4.44362   | -2.22571   | BGIOSGA037299 | XP_006652404.2 beta-glucosidase 10-like                                              |
| TCONS_00010618 | -0.279351 | 0.146099   | -0.483254  | BGIOSGA037830 | XP_004982260.1cation/calcium exchanger 1                                             |
| TCONS_00017445 | -0.279298 | -0.682522  | 0.677907   | BGIOSGA028941 | XP_006659555.1 phosphoribosylglycinamide formyltransferase, chloroplastic isoform X1 |
| TCONS_00027581 | -0.27903  | -0.345383  | -0.351229  | BGIOSGA024746 | XP_004972553.1YTH domain-containing family protein 2                                 |
| TCONS_00018202 | -0.278897 | -1.30341   | -0.823591  | BGIOSGA000913 | XP_006654708.1 protein IQ-DOMAIN 31-like                                             |
| TCONS_00012480 | -0.278826 | -1.71923   | -0.423406  | BGIOSGA010499 | XP_010230025.2 U-box domain-containing protein 57                                    |
| TCONS_00002419 | -0.278815 | -0.616184  | -2.02203   | BGIOSGA025562 | XP_015690763.1PREDICTED: uncharacterized protein LOC102709336                        |
| TCONS_00011765 | -0.278735 | 0.0966115  | 0.152127   | BGIOSGA011240 | XP_006649601.1 protein RBL                                                           |
| TCONS_00000762 | -0.278634 | -0.123288  | -0.112208  | BGIOSGA026454 | XP_015699292.1PREDICTED: uncharacterized protein LOC102722811 isoform X1             |
| TCONS_00020458 | -0.278561 | -0.500409  | -0.0173983 | BGIOSGA012622 | XP_015694040.1 chromatin structure-remodeling complex protein SYD isoform X4         |
| TCONS_00003516 | -0.278318 | -1.06831   | -0.731323  | BGIOSGA011580 | XP_006661554.1 delta(14)-sterol reductase                                            |
| TCONS_00020142 | -0.27814  | -0.556487  | -0.241785  | BGIOSGA011277 | XP_003564311.1protein sip5                                                           |
| TCONS_00011707 | -0.278064 | -0.162807  | -0.197898  | BGIOSGA011303 | XP_006649534.2PREDICTED: uncharacterized protein LOC102719279                        |
| TCONS_00027634 | -0.277926 | 0.129331   | 0.198049   | BGIOSGA032735 | XP_006659242.1PREDICTED: uncharacterized protein LOC102703886                        |
| TCONS_00016054 | -0.27786  | -1.41011   | -0.0293565 | BGIOSGA014923 | XP_015692342.1 protection of telomeres protein 1b-like                               |

transcriptome

|                |           |            |             |               |                                                                                       |
|----------------|-----------|------------|-------------|---------------|---------------------------------------------------------------------------------------|
| TCONS_00016664 | -0.277618 | -0.0600298 | 0.10641     | BGIOSGA014298 | XP_015692239.1PREDICTED: uncharacterized protein LOC102699586 isoform X2              |
| TCONS_00007327 | -0.277568 | -0.812141  | 0.145354    | BGIOSGA034139 | XP_006646871.1 cycloartenol synthase                                                  |
| TCONS_00013519 | -0.27752  | 0.0952657  | 0.359977    | BGIOSGA008587 | XP_006650881.1 putative RNA-binding protein Luc7-like 2                               |
| TCONS_00034794 | -0.277393 | #NA        | #NA         | #NA           | #NA                                                                                   |
| TCONS_00037886 | -0.277393 | -1.34939   | 0.701773    | #NA           | #NA                                                                                   |
| TCONS_00005822 | -0.277373 | -1.54365   | -0.740536   | BGIOSGA007946 | XP_006647149.2 transcription factor MYB28-like isoform X2                             |
| TCONS_00030878 | -0.277249 | -0.508165  | -0.354884   | BGIOSGA032677 | XP_006661697.1PREDICTED: uncharacterized protein LOC102717002                         |
| TCONS_00012150 | -0.277202 | 1.55734    | 0.0760181   | BGIOSGA016345 | XP_006649984.1 neutral/alkaline invertase 1, mitochondrial                            |
| TCONS_00016954 | -0.277069 | 0.194372   | -0.0263253  | BGIOSGA019005 | XP_006653942.1 transforming growth factor-beta receptor-associated protein 1          |
| TCONS_00020365 | -0.276639 | 0.157781   | -0.061656   | BGIOSGA037116 | NP_001132153.2uncharacterized LOC100193572                                            |
| TCONS_00013199 | -0.276568 | -0.540232  | -0.285206   | BGIOSGA027771 | XP_006650607.1PREDICTED: uncharacterized protein LOC102700413                         |
| TCONS_00016515 | -0.276453 | -0.872526  | 0.503718    | BGIOSGA029607 | XP_006652722.1 E3 ubiquitin-protein ligase Os04g0590900-like                          |
| TCONS_00025795 | -0.276437 | -0.154656  | -0.245611   | BGIOSGA022888 | XP_015696195.1 bromodomain-containing factor 1                                        |
| TCONS_00007411 | -0.276321 | -1.2732    | -0.885399   | BGIOSGA016325 | XP_006646930.1 OTU domain-containing protein DDB_G0284757-like                        |
| TCONS_00034267 | -0.276081 | 1.01251    | -0.108317   | BGIOSGA038562 | XP_006664317.2 cytochrome c-type biogenesis ccca-like chloroplastic protein 1         |
| TCONS_00011045 | -0.276073 | -1.52224   | -0.74824    | BGIOSGA031303 | XP_006650665.1 leucine-rich repeat receptor-like serine/threonine-protein kinase BAM1 |
| TCONS_00005674 | -0.275915 | -4.26939   | -2.28584    | BGIOSGA020994 | XP_015688972.1 U-box domain-containing protein 34-like                                |
| TCONS_00034432 | -0.275892 | 0.818448   | 0.269968    | BGIOSGA027623 | NP_001308992.1putative NAC domain transcription factor superfamily protein            |
| TCONS_00006441 | -0.275479 | 0.704451   | 0.122831    | BGIOSGA034914 | XP_003575334.1protein TAB2 homolog, chloroplastic                                     |
| TCONS_00013745 | -0.275438 | 0.78441    | -0.113484   | BGIOSGA002922 | XP_006653179.1PREDICTED: uncharacterized protein LOC102699860                         |
| TCONS_00029193 | -0.275388 | -0.648983  | -0.0978175  | BGIOSGA026787 | XP_006660729.1 dicarboxylate transporter 2.1, chloroplastic-like                      |
| TCONS_00005317 | -0.275286 | 1.23775    | -0.288415   | BGIOSGA007427 | XP_003573769.1protein LOW PSII ACCUMULATION 2, chloroplastic                          |
| TCONS_00036682 | -0.275268 | 0.21637    | -0.922713   | BGIOSGA032896 | XP_015698830.1 IQ domain-containing protein IQM3-like                                 |
| TCONS_00019440 | -0.275234 | -0.558392  | -1.08272    | BGIOSGA017913 | XP_006654516.1 very-long-chain (3R)-3-hydroxyacyl-CoA dehydratase 2                   |
| TCONS_00024150 | -0.275217 | -0.224695  | -0.802335   | BGIOSGA017730 | XP_006658854.1 myb-like protein Q                                                     |
| TCONS_00001929 | -0.275138 | -0.323948  | -0.663258   | BGIOSGA014087 | XP_006646391.1 katanin p80 WD40 repeat-containing subunit B1 homolog                  |
| TCONS_00029781 | -0.275125 | -0.233145  | 0.258413    | BGIOSGA024445 | XP_006660667.1 transcription initiation factor TFIID subunit 15 isoform X1            |
| TCONS_00011923 | -0.275099 | 0.053295   | 0.154117    | BGIOSGA001977 | XP_006649759.1 topless-related protein 1-like                                         |
| TCONS_00005198 | -0.274777 | -0.0123211 | -0.506984   | BGIOSGA010981 | XP_006645409.1 ABC transporter B family member 20-like                                |
| TCONS_00033404 | -0.274732 | -2.59897   | 0.526764    | BGIOSGA009108 | XP_006662873.1PREDICTED: uncharacterized protein LOC102718029                         |
| TCONS_00016033 | -0.274313 | -0.0209766 | 0.143229    | BGIOSGA028697 | XP_004975879.1betaine aldehyde dehydrogenase 1                                        |
| TCONS_00001927 | -0.274283 | -0.148271  | -0.205253   | BGIOSGA014196 | XP_015694229.1 L-type lectin-domain containing receptor kinase IX.1-like              |
| TCONS_00000825 | -0.274266 | -1.86507   | -0.138957   | BGIOSGA003415 | XP_006645844.1 GDSL esterase/lipase LIP-4-like                                        |
| TCONS_00021152 | -0.274198 | -0.192625  | 0.429915    | BGIOSGA025368 | XP_006656305.1 transcription initiation factor TFIID subunit 5                        |
| TCONS_00000568 | -0.274195 | -0.436691  | 0.147093    | BGIOSGA003148 | NP_001144560.1uncharacterized protein LOC100277564                                    |
| TCONS_00024124 | -0.27403  | 0.00931441 | -0.0263074  | BGIOSGA026159 | XP_006658826.1 AP-4 complex subunit mu                                                |
| TCONS_00028229 | -0.273848 | 0.213373   | -0.337536   | BGIOSGA028441 | XP_003574688.1heterogeneous nuclear ribonucleoprotein A0 isoform X2                   |
| TCONS_00001298 | -0.273693 | -1.15308   | -1.46231    | BGIOSGA028917 | XP_003569313.1transcription factor MYBS3                                              |
| TCONS_00008572 | -0.273546 | -0.313076  | 0.602336    | BGIOSGA025652 | XP_003570086.1E3 ubiquitin-protein ligase At1g63170                                   |
| TCONS_00034305 | -0.273493 | 0.330347   | -0.00338046 | BGIOSGA034498 | XP_022683907.1DDT domain-containing protein PTM                                       |
| TCONS_00020460 | -0.27341  | 0.359341   | 0.423743    | BGIOSGA022640 | XP_006655977.2 exocyst complex component EXO70A1-like isoform X1                      |
| TCONS_00027974 | -0.273272 | 0.331588   | -0.249563   | BGIOSGA038651 | XP_015693091.1 putative disease resistance RPP13-like protein 2 isoform X2            |
| TCONS_00027169 | -0.273262 | -0.880395  | -3.33022    | BGIOSGA029219 | XP_006660403.1 protein PROTON GRADIENT REGULATION 5, chloroplastic                    |
| TCONS_00012139 | -0.273076 | -0.807681  | -0.800883   | BGIOSGA008412 | XP_004977032.1uncharacterized protein LOC101770369                                    |
| TCONS_00032471 | -0.272897 | -2.45834   | -3.3813     | BGIOSGA007412 | XP_015697281.1 S-(+)-linalool synthase, chloroplastic-like                            |
| TCONS_00005880 | -0.272553 | 0.0405205  | 0.164322    | BGIOSGA038236 | XP_015689574.1PREDICTED: uncharacterized protein LOC102709338 isoform X1              |
| TCONS_00031705 | -0.27246  | -1.25854   | -1.5019     | BGIOSGA013495 | XP_006662130.1 inositol-tetrakisphosphate 1-kinase 1                                  |
| TCONS_00016496 | -0.272401 | 0.717536   | -0.880562   | BGIOSGA005824 | XP_008668978.1uncharacterized protein At4g15970                                       |
| TCONS_00016087 | -0.272389 | -2.04952   | -1.30456    | BGIOSGA011222 | XP_006652406.1 beta-glucosidase 13                                                    |
| TCONS_00030896 | -0.272343 | 0.380428   | -0.00623661 | BGIOSGA011673 | XP_003577058.1uncharacterized protein LOC100837604 isoform X1                         |
| TCONS_00031733 | -0.272129 | -0.64373   | -1.23924    | BGIOSGA021117 | XP_006661605.2 cell number regulator 10-like                                          |
| TCONS_00002117 | -0.27196  | -0.524359  | -1.69741    | BGIOSGA004744 | XP_006644959.1PREDICTED: uncharacterized protein LOC102719339                         |

transcriptome

|                |           |            |             |               |                                                                                       |
|----------------|-----------|------------|-------------|---------------|---------------------------------------------------------------------------------------|
| TCONS_00024757 | -0.271905 | -0.698126  | -1.46676    | BGIOSGA024620 | XP_010234976.1exocyst complex component EXO70E2                                       |
| TCONS_00033046 | -0.271857 | 2.01453    | 0.233565    | BGIOSGA015096 | XP_020407531.1leucine-rich repeat receptor protein kinase EMS1                        |
| TCONS_00017481 | -0.271829 | -0.211706  | 0.0643918   | BGIOSGA017940 | XP_006654199.2 phosphatidylinositol:ceramide inositolphosphotransferase-like          |
| TCONS_00024345 | -0.271818 | 1.10253    | -0.896777   | BGIOSGA026385 | XP_015691194.1 mannose-1-phosphate guanyltriferase alpha                              |
| TCONS_00013221 | -0.271394 | 0.403597   | -0.202766   | BGIOSGA001432 | XP_006650640.1 mitogen-activated protein kinase kinase kinase YODA-like               |
| TCONS_00009728 | -0.271277 | -0.727153  | -0.0473251  | BGIOSGA029198 | XP_003558293.1 uncharacterized TPR repeat-containing protein At1g05150                |
| TCONS_00023914 | -0.271251 | -0.246217  | -0.0243783  | BGIOSGA023709 | XP_006658693.1 B3 domain-containing protein Os07g0563300                              |
| TCONS_00016685 | -0.271101 | -1.06171   | 0.168684    | BGIOSGA036785 | XP_006652875.1 G-type lectin S-receptor-like serine/threonine-protein kinase At1g1410 |
| TCONS_00001500 | -0.271063 | -1.93146   | -0.785694   | BGIOSGA017925 | XP_006646161.1 probable protein phosphatase 2C 8                                      |
| TCONS_00032652 | -0.270984 | 0.474111   | 0.394387    | BGIOSGA031458 | XP_015697308.1 translocase of chloroplast 132, chloroplastic-like                     |
| TCONS_00007154 | -0.270887 | -0.93636   | -1.1866     | BGIOSGA001837 | XP_006648164.1 PREDICTED: uncharacterized protein LOC102709148                        |
| TCONS_00024339 | -0.270788 | 0.813316   | 0.312487    | BGIOSGA019210 | XP_006658116.1 60S ribosomal protein L18-3-like                                       |
| TCONS_00010853 | -0.270693 | 0.188426   | 0.645781    | BGIOSGA013478 | XP_006651758.2 eIF-2-alpha kinase activator GCN1                                      |
| TCONS_00021240 | -0.270686 | -0.869584  | 0.0327274   | BGIOSGA008744 | XP_015692476.1 anaphase-promoting complex subunit 8-like                              |
| TCONS_00033021 | -0.270621 | -1.2847    | -0.753725   | BGIOSGA034856 | XP_006662757.1 disease resistance protein RGA2-like                                   |
| TCONS_00007453 | -0.270125 | -0.467289  | -0.00819812 | BGIOSGA016474 | XP_006646962.1 calmodulin-binding protein 60 B-like                                   |
| TCONS_00023161 | -0.270121 | 0.409641   | 0.0572161   | BGIOSGA013504 | XP_015695236.1 ubiquitin carboxyl-terminal hydrolase 12-like                          |
| TCONS_00020845 | -0.269992 | 0.772084   | 0.523631    | BGIOSGA023052 | XP_006657030.1 PREDICTED: uncharacterized protein LOC102704430                        |
| TCONS_00030299 | -0.269944 | -0.774888  | 0.121269    | BGIOSGA029509 | XP_008668192.1 lipid binding protein isoform X1                                       |
| TCONS_00008371 | -0.269942 | -0.492007  | 0.473249    | BGIOSGA014772 | XP_015689232.1 F-box/LRR-repeat protein 14-like                                       |
| TCONS_00016403 | -0.269833 | -4.3595    | #NA         | BGIOSGA005973 | XP_008663515.1 uncharacterized protein LOC103641989                                   |
| TCONS_00023687 | -0.269701 | 0.757412   | 0.33946     | BGIOSGA023962 | XP_006657710.1 photosynthetic NDH subunit of subcomplex B 3, chloroplastic            |
| TCONS_00036744 | -0.269678 | -0.390178  | 0.461564    | BGIOSGA027811 | XP_006664362.1 serine/threonine-protein kinase STY8-like                              |
| TCONS_00026580 | -0.269507 | -0.705478  | -0.662165   | BGIOSGA028648 | XP_006664057.1 PREDICTED: uncharacterized protein LOC102705771                        |
| TCONS_00020434 | -0.269479 | -0.370843  | -0.963759   | BGIOSGA022618 | XP_006656839.2 alanine-tRNA ligase, chloroplastic/mitochondrial                       |
| TCONS_00017989 | -0.269416 | 0.950171   | -0.633263   | BGIOSGA000561 | XP_021303488.1 PRA1 family protein B2-like                                            |
| TCONS_00034486 | -0.269178 | 0.539457   | 0.237001    | BGIOSGA003374 | XP_004967389.2 uncharacterized protein LOC101762180                                   |
| TCONS_00026676 | -0.269145 | -0.816766  | -0.611468   | BGIOSGA028743 | XP_006659448.1 NADP-dependent glyceraldehyde-3-phosphate dehydrogenase                |
| TCONS_00002865 | -0.269092 | -0.549284  | -1.30522    | BGIOSGA002354 | XP_006643775.1 protein PHLOEM PROTEIN 2-LIKE A1-like                                  |
| TCONS_00036192 | -0.269042 | 0.1581     | -0.251435   | BGIOSGA040690 | XP_015698324.1 PREDICTED: uncharacterized protein LOC102701322                        |
| TCONS_00012259 | -0.268926 | 0.00267633 | 0.188851    | BGIOSGA024065 | XP_006651369.2 PREDICTED: uncharacterized protein LOC102720970                        |
| TCONS_00016853 | -0.268883 | #NA        | #NA         | BGIOSGA014111 | XP_006653866.1 uracil-DNA glycosylase, mitochondrial                                  |
| TCONS_00029081 | -0.268782 | -0.446436  | 0.393357    | BGIOSGA025024 | XP_006660657.1 2Fe-2S ferredoxin-like isoform X2                                      |
| TCONS_00035693 | -0.268739 | -1.65854   | -1.52221    | BGIOSGA034518 | XP_003578818.1 BTB/POZ domain-containing protein At2g13690                            |
| TCONS_00021106 | -0.26866  | -0.769761  | -0.933207   | BGIOSGA023330 | XP_006657168.1 PREDICTED: uncharacterized protein LOC102707322                        |
| TCONS_00000317 | -0.268586 | 0.847065   | 0.0264991   | BGIOSGA002891 | XP_006643832.1 PREDICTED: uncharacterized protein LOC102715614 isoform X2             |
| TCONS_00008652 | -0.268556 | 0.223092   | 0.0682122   | BGIOSGA005775 | XP_006647759.1 PREDICTED: uncharacterized protein LOC102710093                        |
| TCONS_00003017 | -0.268549 | 1.05285    | -0.433203   | BGIOSGA018635 | XP_003564938.1 PRA1 family protein F3                                                 |
| TCONS_00025637 | -0.268531 | -0.784214  | -1.36446    | BGIOSGA009199 | XP_006658912.2 serine carboxypeptidase II-3-like                                      |
| TCONS_00024052 | -0.268354 | -2.14043   | -0.44816    | BGIOSGA033506 | XP_015694479.1 protein NRT1/ PTR FAMILY 8.3-like                                      |
| TCONS_00037300 | -0.268306 | -0.020601  | -0.426582   | BGIOSGA036068 | XP_006664605.1 PREDICTED: uncharacterized protein LOC102718980                        |
| TCONS_00003000 | -0.268192 | -0.404573  | 1.13311     | BGIOSGA013472 | XP_004968503.1 transcription factor RAX2                                              |
| TCONS_00009443 | -0.26809  | -0.521477  | -0.271297   | BGIOSGA032005 | XP_006649507.1 phosphoinositide phosphatase SAC2 isoform X2                           |
| TCONS_00024711 | -0.267987 | 0.0124263  | -0.391209   | BGIOSGA010340 | XP_006657534.2 phosphoacetylglucosamine mutase                                        |
| TCONS_00014533 | -0.267907 | -1.07914   | -0.500239   | BGIOSGA008607 | XP_015691734.1 S-adenosylmethionine decarboxylase prenylase                           |
| TCONS_00019834 | -0.267437 | -0.0624018 | 0.633198    | BGIOSGA017522 | XP_004961159.1 uncharacterized protein LOC101784147 isoform X1                        |
| TCONS_00014545 | -0.267284 | -1.11062   | -0.0850402  | BGIOSGA018841 | XP_006652479.1 shikimate O-hydroxycinnamoyltransferase                                |
| TCONS_00036205 | -0.267144 | -0.600292  | -0.276954   | BGIOSGA024350 | XP_002442300.2 F-box/LRR-repeat protein 3                                             |
| TCONS_00033968 | -0.26677  | -0.791714  | -0.273418   | BGIOSGA000267 | XP_004979897.1 WD repeat-containing protein VIP3                                      |
| TCONS_00004654 | -0.266755 | 0.528222   | -0.425821   | BGIOSGA020038 | XP_015690280.1 protein RETICULATA-RELATED 5, chloroplastic-like                       |
| TCONS_00016270 | -0.266566 | 0.114901   | -0.051317   | #NA           | #NA                                                                                   |

transcriptome

|                |           |             |            |               |                                                                                                         |
|----------------|-----------|-------------|------------|---------------|---------------------------------------------------------------------------------------------------------|
| TCONS_00030605 | -0.266256 | 1.31881     | -0.278344  | BGIOSGA016493 | XP_006661608.1 probable NAD(P)H-dependent oxidoreductase 2                                              |
| TCONS_0002343  | -0.266165 | -0.607203   | 0.493675   | BGIOSGA004984 | XP_015690666.1 PREDICTED: uncharacterized protein LOC102710354, partial                                 |
| TCONS_00021683 | -0.265891 | -1.90645    | -1.59811   | BGIOSGA037144 | XP_004964753.2F-box protein At5g67140 isoform X1                                                        |
| TCONS_00000280 | -0.265801 | -0.532167   | 0.0655614  | BGIOSGA008965 | XP_003569202.1O-fucosyltransferase 3 isoform X1                                                         |
| TCONS_00010993 | -0.26573  | 0.0356949   | -0.6063    | BGIOSGA025427 | XP_017696773.1 mitotic checkpoint protein BUB3.3                                                        |
| TCONS_00037578 | -0.265729 | -0.622408   | -0.662427  | BGIOSGA035781 | XP_015698645.1 ATP-dependent RNA helicase DEAH12, chloroplastic                                         |
| TCONS_00024275 | -0.265561 | 0.301056    | 0.359752   | BGIOSGA026320 | XP_006658922.2 WD repeat-containing protein 55                                                          |
| TCONS_00009421 | -0.26529  | 0.669166    | 0.00643091 | BGIOSGA011972 | XP_006649494.1 elongation factor 1-alpha                                                                |
| TCONS_00006761 | -0.265114 | -0.0863254  | -0.0194424 | BGIOSGA035659 | XP_006647802.1 ADP,ATP carrier protein, mitochondrial                                                   |
| TCONS_00015199 | -0.26493  | -0.392231   | 0.196872   | BGIOSGA017379 | XP_015692209.1 probable serine/threonine-protein kinase At5g41260                                       |
| TCONS_00015080 | -0.264883 | -0.45831    | -1.53234   | BGIOSGA017085 | XP_015692168.1 protein TIFY 3-like isoform X2                                                           |
| TCONS_00017635 | -0.264777 | -0.0507537  | 0.43474    | BGIOSGA023344 | XP_006654300.1 ferrochelatase-2, chloroplastic                                                          |
| TCONS_00008284 | -0.264516 | -1.47959    | -1.33845   | BGIOSGA025243 | XP_006647436.1 serine/threonine-protein kinase Nek6                                                     |
| TCONS_00002642 | -0.264403 | -0.876984   | 0.572272   | BGIOSGA009975 | XP_010232888.1transcription factor MYB59 isoform X2                                                     |
| TCONS_00037374 | -0.264401 | 0.753651    | -0.223297  | BGIOSGA004756 | XP_004962744.1protein NPG1                                                                              |
| TCONS_00027937 | -0.264298 | -0.943169   | -0.629174  | BGIOSGA000253 | XP_004973329.1UDP-glucose 4-epimerase 2                                                                 |
| TCONS_00021840 | -0.264092 | -0.988329   | 0.426375   | BGIOSGA021678 | XP_006655909.1 RNA-binding protein 5                                                                    |
| TCONS_00000092 | -0.264039 | 1.3821      | 0.417944   | BGIOSGA002661 | XP_015688076.1 fruit protein pKIWI502-like                                                              |
| TCONS_00002172 | -0.263962 | 0.779488    | -1.43934   | BGIOSGA037749 | XP_006645016.1PREDICTED: uncharacterized protein LOC102711854                                           |
| TCONS_00013132 | -0.263948 | 0.830527    | 0.359399   | BGIOSGA029345 | XP_006650551.1 ATP-dependent RNA helicase A-like                                                        |
| TCONS_00013513 | -0.263738 | -2.36706    | -0.331642  | #N/A          | #N/A                                                                                                    |
| TCONS_00035907 | -0.263738 | -0.367061   | -1.9166    | #N/A          | #N/A                                                                                                    |
| TCONS_00004218 | -0.263267 | -1.43623    | -0.386307  | BGIOSGA019297 | XP_008655107.1protein binding protein isoform X1                                                        |
| TCONS_00020420 | -0.263088 | -0.0614465  | 0.291621   | BGIOSGA022606 | XP_015693526.1 ribosomal RNA small subunit methyltransferase G                                          |
| TCONS_00003588 | -0.262968 | 0.36008     | 1.00492    | BGIOSGA001615 | XP_006644180.1 guanine nucleotide-binding protein-like NSN1                                             |
| TCONS_00023939 | -0.262968 | 0.216984    | 0.88886    | BGIOSGA025971 | XP_014752830.1protein N-lysine methyltransferase METTL21A                                               |
| TCONS_00030826 | -0.262897 | 0.176449    | 0.168561   | BGIOSGA017709 | XP_003573835.1receptor-like serine/threonine-protein kinase At2g45590                                   |
| TCONS_00016522 | -0.262883 | -0.860778   | 0.301677   | BGIOSGA013408 | XP_006652728.1 uncharacterized membrane protein At4g09580-like                                          |
| TCONS_00030419 | -0.262694 | 0.125379    | -1.49231   | BGIOSGA029383 | XP_015696434.1 protein STAY-GREEN, chloroplastic-like                                                   |
| TCONS_00000738 | -0.262677 | 0.224398    | -0.671351  | BGIOSGA019676 | XP_006644111.1 protein FAM91A1                                                                          |
| TCONS_00012786 | -0.262645 | 1.38089     | 0.823066   | BGIOSGA035855 | XP_015690721.1 protein LOL3                                                                             |
| TCONS_00030156 | -0.262417 | 1.1545      | -0.0136711 | BGIOSGA029646 | XP_015696373.1 dipeptidyl aminopeptidase BI                                                             |
| TCONS_00019782 | -0.262265 | -0.214645   | -0.0900412 | BGIOSGA017577 | XP_006654775.1 golgin candidate 5                                                                       |
| TCONS_00013279 | -0.262134 | -2.59751    | -1.27989   | BGIOSGA013598 | XP_004981515.1patatin-like protein 3                                                                    |
| TCONS_00036171 | -0.262092 | -0.0576401  | 0.14698    | BGIOSGA034322 | XP_003575725.1lysine-specific demethylase 6B                                                            |
| TCONS_00029535 | -0.262043 | 0.316662    | 0.249963   | BGIOSGA026086 | XP_006660993.2 protein HIRA                                                                             |
| TCONS_00023353 | -0.262027 | -1.14294    | 0.260917   | #N/A          | #N/A                                                                                                    |
| TCONS_00003522 | -0.262015 | -0.00883421 | -0.670568  | BGIOSGA015573 | XP_006645881.1 ABC transporter C family member 4-like                                                   |
| TCONS_00025957 | -0.261812 | 0.825483    | -0.864196  | BGIOSGA011089 | XP_006659155.1 topless-related protein 1-like                                                           |
| TCONS_00001055 | -0.261633 | 0.33049     | -0.740065  | BGIOSGA031396 | XP_003565794.1transcription factor MYBS1                                                                |
| TCONS_00018240 | -0.261492 | -3.31354    | -1.10298   | BGIOSGA004364 | XP_006654733.1 myb-related protein Hv33-like                                                            |
| TCONS_00030789 | -0.261333 | -0.954312   | -0.757711  | BGIOSGA032597 | XP_006651590.1 GPI ethanolamine phosphate transferase 3 isoform X1                                      |
| TCONS_00004133 | -0.261304 | 0.71997     | 0.59067    | BGIOSGA001060 | XP_006644490.1 persulfide dioxygenase ETHE1 homolog, mitochondrial                                      |
| TCONS_00014925 | -0.261202 | 0.411323    | -0.0374114 | BGIOSGA006962 | XP_006658699.1 brefeldin A-inhibited guanine nucleotide-exchange protein 5                              |
| TCONS_00001920 | -0.261005 | -0.398611   | -0.572363  | BGIOSGA004556 | XP_004970170.1uncharacterized protein At1g27050                                                         |
| TCONS_00021563 | -0.260989 | 0.411008    | -0.262098  | BGIOSGA001316 | XP_006655762.1 hypersensitive-induced response protein 4                                                |
| TCONS_00004117 | -0.260984 | -0.759596   | -0.104249  | BGIOSGA001077 | XP_006644472.1 1,4-dihydroxy-2-naphthoyl-CoA synthase, peroxisomal                                      |
| TCONS_00006387 | -0.26078  | -1.04992    | -0.276253  | BGIOSGA016624 | XP_015689678.1 uncharacterized membrane protein At3g27390 isoform X1                                    |
| TCONS_00020529 | -0.260456 | -0.563704   | -0.430724  | BGIOSGA024796 | XP_006665105.2 calcium/calmodulin-regulated receptor-like kinase 2                                      |
| TCONS_00016791 | -0.260109 | #NA         | -1.92557   | BGIOSGA013065 | XP_009394490.1 V-type proton ATPase subunit e1-like                                                     |
| TCONS_00017525 | -0.260104 | -1.35434    | -2.59343   | BGIOSGA036743 | XP_004962480.1protein LURP-one-related 8                                                                |
| TCONS_00023097 | -0.260083 | -0.974452   | -1.58232   | BGIOSGA009712 | XP_006657435.1 reticulon-like protein B8                                                                |
| TCONS_00002910 | -0.259959 | -0.882337   | 0.29951    | BGIOSGA010536 | XP_003569192.1uncharacterized protein LOC100828088                                                      |
| TCONS_00009968 | -0.259948 | -2.31549    | 0.173288   | BGIOSGA004234 | XP_004984553.1F-box protein At5g46170                                                                   |
| TCONS_00001423 | -0.2598   | -1.38942    | -0.147966  | BGIOSGA024540 | XP_015698857.1 glucose-1-phosphate adenylyltransferase large subunit 1, chloroplastic/amyloplastic-like |
| TCONS_00010798 | -0.25973  | 0.542217    | -0.10736   | BGIOSGA034231 | XP_004982024.1putative F-box protein At1g65770                                                          |
| TCONS_00029322 | -0.259723 | -0.184685   | 0.019923   | BGIOSGA016301 | XP_006660822.1PREDICTED: uncharacterized protein At2g33490-like                                         |
| TCONS_00011805 | -0.259663 | 0.462118    | 0.103147   | BGIOSGA031921 | XP_015690996.1 3-ketoacyl-CoA synthase 6-like                                                           |

transcriptome

|                |           |            |            |               |                                                                                           |
|----------------|-----------|------------|------------|---------------|-------------------------------------------------------------------------------------------|
| TCONS_00019587 | -0.259628 | 0.269069   | 0.35805    | BGIOSGA017771 | XP_006654609.1 H/ACA ribonucleoprotein complex non-core subunit NAF1-like                 |
| TCONS_00017175 | -0.259489 | -0.441599  | 0.0232873  | BGIOSGA019220 | XP_015688736.1PREDICTED: uncharacterized protein LOC102721967 isoform X2                  |
| TCONS_00016151 | -0.259489 | -1.40918   | 0.0846878  | BGIOSGA035126 | XP_015691805.1 protein NRT1/ PTR FAMILY 4.5-like                                          |
| TCONS_00001004 | -0.259329 | -0.447587  | -0.386261  | BGIOSGA002152 | XP_010237340.1ribosome quality control complex subunit 2 isoform X2                       |
| TCONS_00009832 | -0.259234 | -1.33454   | -0.161056  | BGIOSGA031780 | XP_006649900.1 beta-taxilin isoform X2                                                    |
| TCONS_00003729 | -0.259222 | -0.316404  | -0.642955  | BGIOSGA011542 | XP_006645971.2 CBL-interacting protein kinase 8                                           |
| TCONS_00024181 | -0.259128 | -1.22906   | -1.27235   | BGIOSGA020919 | XP_006658013.1 CBL-interacting protein kinase 21                                          |
| TCONS_00006425 | -0.25912  | -1.0274    | -1.35265   | BGIOSGA014811 | XP_006647480.1 B-box zinc finger protein 25-like                                          |
| TCONS_00030346 | -0.258984 | -1.73174   | 0.0282962  | BGIOSGA007296 | XP_004976560.1putative FBD-associated F-box protein At1g61330                             |
| TCONS_00013786 | -0.258984 | 1.35572    | 0.331365   | BGIOSGA015589 | XP_003581017.1UDP-glycosyltransferase 79 isoform X1                                       |
| TCONS_00003157 | -0.258859 | -0.215322  | 0.318345   | BGIOSGA030346 | XP_015699234.1 cyclin-A1-1-like                                                           |
| TCONS_00013051 | -0.258852 | 1.29543    | 0.107606   | BGIOSGA030200 | XP_006650487.1 coatomer subunit alpha-3 isoform X1                                        |
| TCONS_00023780 | -0.2588   | -0.938423  | 0.315642   | BGIOSGA025818 | XP_006657767.1 cytochrome P450 716B1-like                                                 |
| TCONS_00017366 | -0.258747 | 0.457331   | 0.197934   | BGIOSGA019431 | XP_006654166.1 ER membrane protein complex subunit 1                                      |
| TCONS_00011599 | -0.258671 | 0.551427   | 1.28218    | BGIOSGA015820 | XP_004985631.1YTH domain-containing family protein 2 isoform X3                           |
| TCONS_00029804 | -0.258667 | -0.278351  | -1.68345   | BGIOSGA027094 | XP_006660529.1 GDP-mannose transporter GONST4-like                                        |
| TCONS_00021800 | -0.258609 | -0.512016  | 0.109131   | BGIOSGA021714 | XP_006655887.1 phosphopantothenoylcysteine decarboxylase                                  |
| TCONS_00001758 | -0.258164 | 1.43382    | -0.930389  | BGIOSGA028952 | XP_015689810.1 protein Mpv17                                                              |
| TCONS_00010882 | -0.257874 | -0.423279  | 0.828889   | BGIOSGA028838 | XP_006651772.1 DEAD-box ATP-dependent RNA helicase 16                                     |
| TCONS_00003120 | -0.257667 | -2.67451   | -0.170385  | BGIOSGA012010 | XP_002454916.1uncharacterized protein LOC8079483                                          |
| TCONS_00001048 | -0.257454 | -0.688986  | 0.198039   | BGIOSGA003655 | NP_001147064.1heat shock protein binding protein                                          |
| TCONS_00011987 | -0.257044 | -0.888324  | 0.092927   | BGIOSGA011027 | XP_006649830.2 serine/arginine repetitive matrix protein 1                                |
| TCONS_00017397 | -0.256968 | -0.745709  | -0.300824  | BGIOSGA031001 | NP_001141460.1triose phosphate/phosphate translocator                                     |
| TCONS_00002737 | -0.256538 | -1.66056   | -1.11069   | BGIOSGA002477 | XP_006643706.1 Bowman-Birk type bran trypsin inhibitor-like                               |
| TCONS_00027177 | -0.256445 | -0.0780742 | 0.291703   | BGIOSGA027822 | XP_003573239.1probable E3 ubiquitin ligase SUD1                                           |
| TCONS_00025063 | -0.256331 | -0.206555  | -0.0217345 | BGIOSGA001275 | XP_015694486.1 ubiquitin-related modifier 1 homolog isoform X1                            |
| TCONS_00019539 | -0.256323 | -0.777078  | -0.215833  | BGIOSGA020163 | XP_006654574.1 F-box protein At4g18380-like                                               |
| TCONS_00002108 | -0.256295 | -0.456049  | -0.877931  | BGIOSGA029411 | XP_006644951.1 BAG family molecular chaperone regulator 4                                 |
| TCONS_00021004 | -0.256096 | -0.943909  | 0.409331   | BGIOSGA023235 | XP_006657118.2 flocculation protein FLO11                                                 |
| TCONS_00037444 | -0.256027 | -0.776604  | 0.985743   | BGIOSGA008617 | XP_004963031.1adenine phosphoribosyltransferase 1                                         |
| TCONS_00003836 | -0.255959 | -0.752829  | 0.439125   | BGIOSGA005794 | XP_006646018.2 IQ domain-containing protein IQM1                                          |
| TCONS_00005909 | -0.255839 | 1.41142    | 1.17975    | BGIOSGA038519 | XP_015688567.1PREDICTED: uncharacterized protein LOC102701059                             |
| TCONS_00025935 | -0.255612 | -1.22389   | -1.36348   | BGIOSGA036360 | XP_006659844.1 oxysterol-binding protein-related protein 2A-like                          |
| TCONS_00002921 | -0.255249 | #NA        | -0.93761   | BGIOSGA037754 | NP_001144755.2uncharacterized protein LOC100277806 precursor                              |
| TCONS_00013038 | -0.255048 | 0.129075   | -0.10357   | BGIOSGA026216 | XP_021307245.1probable transcription factor At3g04930                                     |
| TCONS_00034180 | -0.25503  | -1.90988   | -1.61239   | BGIOSGA036054 | XP_006663750.1 mannan endo-1,4-beta-mannosidase 8-like                                    |
| TCONS_00004162 | -0.254951 | -0.396873  | -0.428066  | BGIOSGA007864 | XP_006644507.1 serine/threonine-protein kinase EDR1                                       |
| TCONS_00029699 | -0.25471  | -0.411821  | -0.628331  | BGIOSGA017207 | XP_020396114.1putative phototropic-resoposive NPH3 family protein isoform X1              |
| TCONS_00011273 | -0.254665 | 0.243605   | 0.912939   | BGIOSGA029530 | XP_006651988.1 galactokinase                                                              |
| TCONS_00024622 | -0.254515 | -1.26921   | -2.08858   | BGIOSGA024543 | XP_006658306.1 indole-3-acetaldehyde oxidase                                              |
| TCONS_00008297 | -0.254115 | -0.697326  | -0.695098  | BGIOSGA014880 | XP_006647448.1 beta-1,4-mannosyl-glycoprotein 4-beta-N-acetylglucosaminyltransferase-like |
| TCONS_00037540 | -0.254039 | 0.6511     | 0.544023   | BGIOSGA013109 | XP_004982319.1translation initiation factor eIF-2B subunit delta isoform X2               |
| TCONS_00024890 | -0.253898 | -0.255272  | -0.608668  | BGIOSGA024492 | XP_006657604.1 phosphatidylinositol N-acetylglucosaminyltransferase gpi3 subunit          |
| TCONS_00002275 | -0.253683 | 0.423393   | -0.273307  | BGIOSGA018019 | XP_015690549.1 mitotic spindle checkpoint protein MAD1-like                               |
| TCONS_00036404 | -0.253679 | 0.804844   | 1.13753    | BGIOSGA002869 | XP_006664731.1 WD repeat-containing protein 75                                            |
| TCONS_00020074 | -0.253672 | -2.37845   | -0.941512  | BGIOSGA022254 | XP_015694298.1 WASH complex subunit 7-like isoform X1                                     |
| TCONS_00004896 | -0.253337 | 0.393717   | 0.068593   | BGIOSGA000325 | XP_006645171.1 sister chromatid cohesion 1 protein 4                                      |
| TCONS_00003123 | -0.253195 | -0.264041  | 0.0670473  | BGIOSGA033196 | XP_015699250.1 GDSL esterase/lipase At5g45910-like isoform X1                             |
| TCONS_00014805 | -0.253132 | 0.386417   | -1.13796   | BGIOSGA016975 | XP_006652681.1 beta-carotene hydroxylase 2, chloroplastic-like                            |
| TCONS_00030691 | -0.253114 | -1.73375   | -0.0999994 | BGIOSGA017125 | XP_006661627.2 alpha-mannosidase-like isoform X2                                          |
| TCONS_00016388 | -0.253038 | 0.00599506 | -0.435234  | BGIOSGA009830 | XP_006653659.1 BEACH domain-containing protein C2                                         |



## transcriptome

|                |           |            |            |               |                                                                                                                    |
|----------------|-----------|------------|------------|---------------|--------------------------------------------------------------------------------------------------------------------|
| TCONS_00025330 | -0.252874 | -1.76924   | -0.458665  | BGIOSGA024097 | XP_006658689.1 putative PAP-specific phosphatase, mitochondrial                                                    |
| TCONS_00027401 | -0.252816 | -0.0193258 | -0.288334  | BGIOSGA015307 | XP_008654255.1 putative RING/U-box superfamily protein isoform X1                                                  |
| TCONS_00036255 | -0.25279  | 0.101304   | -0.580563  | BGIOSGA037614 | XP_010237137.1 diaminopimelate epimerase, chloroplastic                                                            |
| TCONS_00006662 | -0.252732 | 1.01917    | -0.0216973 | BGIOSGA008831 | XP_006660416.1 aspartate--tRNA ligase 2, cytoplasmic-like                                                          |
| TCONS_00019305 | -0.252616 | 0.249803   | -1.44896   | BGIOSGA009203 | XP_006655332.1 NAC domain-containing protein 72-like                                                               |
| TCONS_00002026 | -0.252589 | -0.371719  | -0.449027  | BGIOSGA040169 | XP_014754758.1L-2-hydroxyglutarate dehydrogenase, mitochondrial                                                    |
| TCONS_00002982 | -0.252294 | -1.9398    | 0.656969   | BGIOSGA002236 | XP_004968480.1 protein TWIN LOV 1 isoform X1                                                                       |
| TCONS_00017942 | -0.252293 | -0.0840464 | -0.284106  | BGIOSGA028845 | XP_015693062.1 60S ribosomal protein L36-3-like                                                                    |
| TCONS_00005381 | -0.252279 | -0.525237  | -0.187357  | BGIOSGA020575 | XP_006648296.2 PREDICTED: uncharacterized protein LOC102701420, partial                                            |
| TCONS_00033900 | -0.252198 | -0.869354  | -3.07273   | BGIOSGA023345 | XP_002437334.1 premmaspirodien oxygenase                                                                           |
| TCONS_00023938 | -0.252193 | -0.0744465 | 0.159088   | BGIOSGA025970 | XP_006658709.1 PREDICTED: uncharacterized protein LOC102723071 isoform X1                                          |
| TCONS_00001945 | -0.251939 | -0.0600477 | -1.13838   | BGIOSGA009810 | XP_006644813.1 NAD(P)H dehydrogenase (quinone) FQR1-like isoform X1                                                |
| TCONS_00008255 | -0.251938 | -0.938769  | -0.634636  | BGIOSGA006173 | XP_015689620.1 PREDICTED: uncharacterized protein LOC102708588 isoform X1                                          |
| TCONS_00001594 | -0.251898 | 1.03293    | -0.118706  | BGIOSGA017608 | XP_006644561.1 guanine nucleotide-binding protein subunit beta-like protein A                                      |
| TCONS_00031107 | -0.25176  | 0.467912   | 0.283579   | #N/A          | #N/A                                                                                                               |
| TCONS_00024328 | -0.251749 | -1.38048   | -0.361297  | BGIOSGA019120 | XP_015698300.1 UPF0481 protein At3g47200-like                                                                      |
| TCONS_00027390 | -0.251666 | 0.48121    | -0.382708  | BGIOSGA016673 | XP_003573458.1 zinc finger CCCH domain-containing protein 56                                                       |
| TCONS_00005206 | -0.251664 | -0.36908   | 0.0271958  | BGIOSGA021508 | XP_015699015.1 E3 ubiquitin-protein ligase listerin isoform X1                                                     |
| TCONS_00006790 | -0.251648 | -2.07334   | -0.451356  | BGIOSGA012849 | XP_003570464.2 O-fucosyltransferase 34 isoform X2                                                                  |
| TCONS_00032538 | -0.251433 | -0.696499  | 0.980696   | BGIOSGA026632 | XP_004982651.121 kDa protein                                                                                       |
| TCONS_00024179 | -0.251317 | -0.718114  | -0.412932  | BGIOSGA026217 | XP_006658872.1 SWI/SNF-related matrix-associated actin-dependent regulator of chromatin subfamily A-like protein 1 |
| TCONS_00031372 | -0.251084 | -0.648985  | -0.161238  | BGIOSGA033185 | XP_006661893.1 G patch domain-containing protein 11-like                                                           |
| TCONS_00030505 | -0.251015 | -0.251289  | -0.409297  | BGIOSGA030813 | XP_010504143.1 histone H4                                                                                          |
| TCONS_00031353 | -0.250982 | -0.755351  | 0.212907   | BGIOSGA027679 | NP_001278609.160S ribosomal protein L37                                                                            |
| TCONS_00027238 | -0.250765 | -0.0252108 | -0.448578  | BGIOSGA002863 | XP_004972482.1 probable serine/threonine-protein kinase At1g54610                                                  |
| TCONS_00001557 | -0.250729 | -2.16761   | 0.444077   | BGIOSGA002158 | XP_006644509.2 probable LRR receptor-like serine/threonine-protein kinase MRH1                                     |
| TCONS_00007870 | -0.250438 | -0.073214  | 0.38133    | BGIOSGA006606 | XP_004952337.1 negative regulator of systemic acquired resistance SN1 isoform X1                                   |
| TCONS_00009120 | -0.250367 | -0.515692  | 0.483476   | BGIOSGA011646 | XP_006649219.2 DNA repair endonuclease UVH1                                                                        |
| TCONS_00010721 | -0.250337 | -0.65995   | -1.01402   | BGIOSGA020279 | XP_015690019.1 glycosyltransferase family protein 64 protein C5-like                                               |
| TCONS_00000017 | -0.250088 | 0.00983755 | -0.164683  | BGIOSGA027407 | XP_015688092.1 protein CHROMATIN REMODELING 8                                                                      |
| TCONS_00033048 | -0.24997  | 1.31687    | 0.570042   | BGIOSGA034883 | XP_006663244.1 sec1 family domain-containing protein MIP3                                                          |
| TCONS_00002280 | -0.249812 | -0.341989  | -0.271101  | BGIOSGA036331 | XP_015688257.1 PREDICTED: uncharacterized protein LOC102718127 isoform X1                                          |
| TCONS_00032786 | -0.249623 | -1.8973    | -0.518607  | BGIOSGA031322 | XP_006662110.1 probable NADH dehydrogenase [ubiquinone] 1 alpha subcomplex subunit 12                              |
| TCONS_00016789 | -0.249557 | 0.45651    | 0.204464   | BGIOSGA024100 | XP_006652953.1 probable serine/threonine-protein kinase abkC                                                       |
| TCONS_00011483 | -0.24953  | -0.517994  | 0.141653   | BGIOSGA001476 | XP_006649310.1 CBL-interacting protein kinase 9 isoform X1                                                         |
| TCONS_00000410 | -0.249197 | -0.341621  | 0.317657   | BGIOSGA018122 | XP_015692375.1 probable pre-mRNA-splicing factor ATP-dependent RNA helicase DEAH9                                  |
| TCONS_00008376 | -0.249171 | 0.0799161  | -0.675243  | BGIOSGA031634 | XP_006647516.1 PREDICTED: uncharacterized protein LOC102709809                                                     |
| TCONS_00008190 | -0.249128 | -0.977286  | -1.17196   | BGIOSGA015018 | XP_015689481.1 putative 12-oxophytodienoate reductase 8 isoform X1                                                 |
| TCONS_00019894 | -0.248826 | -4.75758   | -1.13696   | BGIOSGA019365 | XP_003565827.1 TPR repeat-containing thioredoxin TTL1                                                              |
| TCONS_00035439 | -0.248749 | 0.594946   | -0.307815  | BGIOSGA036849 | XP_006663706.1 clathrin heavy chain 1-like                                                                         |
| TCONS_00037002 | -0.248671 | -0.610129  | -0.208713  | BGIOSGA036372 | XP_006663933.2 DNA-(apurinic or apyrimidinic site) lyase                                                           |
| TCONS_00010253 | -0.248399 | -4.66846   | -3.38585   | BGIOSGA021330 | XP_015689927.1 horcolin-like                                                                                       |
| TCONS_00001494 | -0.248377 | -0.379305  | -0.14022   | BGIOSGA002118 | XP_006644459.2 histone-lysine N-methyltransferase ATX5                                                             |
| TCONS_00023264 | -0.248129 | -0.610811  | -1.72463   | BGIOSGA020095 | XP_002443182.1 uncharacterized protein LOC8064065                                                                  |
| TCONS_00009166 | -0.247989 | -1.32573   | -0.464278  | BGIOSGA018319 | XP_015690693.1 DNA (cytosine-5)-methyltransferase DRM2-like                                                        |
| TCONS_00008716 | -0.247904 | 0.719245   | 0.29415    | BGIOSGA028492 | XP_015689568.1 phosphatidylinositol/phosphatidylcholine transfer protein SFH9-like isoform X1                      |
| TCONS_00031734 | -0.247891 | -0.166699  | 0.115141   | BGIOSGA028031 | XP_006661606.1 transmembrane 9 superfamily member 3-like                                                           |
| TCONS_00004704 | -0.247815 | -0.305861  | 0.0262054  | BGIOSGA019988 | XP_003564587.1 protein ESERALDA 1 isoform X1                                                                       |
| TCONS_00004536 | -0.247684 | -0.688295  | -1.08594   | BGIOSGA000679 | XP_006644820.2 autophagy-related protein 18f-like                                                                  |
| TCONS_00015761 | -0.247626 | -0.0458742 | 0.463263   | BGIOSGA015219 | XP_006652202.2 violaxanthin de-epoxidase, chloroplastic                                                            |

transcriptome

|                |           |            |             |               |                                                                                             |
|----------------|-----------|------------|-------------|---------------|---------------------------------------------------------------------------------------------|
| TCONS_00017469 | -0.247191 | -0.43337   | 0.32962     | BGIOSGA019541 | XP_020403209.1 uncharacterized protein LOC100277740 isoform X1                              |
| TCONS_00009018 | -0.247149 | 0.387957   | 0.594875    | BGIOSGA027055 | XP_003572932.1 leucine-rich repeat extensin-like protein 1                                  |
| TCONS_00030566 | -0.246772 | 0.247417   | 0.346593    | BGIOSGA029238 | XP_006661571.1 cleavage and polyadenylation specificity factor subunit 2                    |
| TCONS_00008538 | -0.24673  | -0.385808  | -0.958846   | BGIOSGA019048 | XP_004953378.1 actin-depolymerizing factor 1                                                |
| TCONS_00029399 | -0.246493 | -0.237288  | 0.933642    | BGIOSGA017628 | XP_006660890.1 transcription initiation factor IIB                                          |
| TCONS_00008135 | -0.246361 | 0.139877   | 0.446351    | BGIOSGA005419 | XP_006647348.1 pyrophosphate-energized membrane proton pump 3                               |
| TCONS_00032413 | -0.246235 | -0.763674  | -1.48136    | BGIOSGA035060 | XP_006661858.2 non-lysosomal glucosylceramidase-like isoform X1                             |
| TCONS_00001740 | -0.246166 | -0.155098  | 0.0227176   | BGIOSGA029961 | XP_006646277.1 ABC transporter G family member 38                                           |
| TCONS_00004959 | -0.245222 | -0.936388  | -0.34276    | BGIOSGA015046 | XP_006646603.1 probable UDP-N-acetylglucosamine-peptide N-acetylglucosaminyltransferase SEC |
| TCONS_00002060 | -0.245122 | -0.352369  | 0.629786    | BGIOSGA012556 | XP_006644904.1 2,3-bisphosphoglycerate-independent phosphoglycerate mutase                  |
| TCONS_00036048 | -0.245064 | 0.912037   | 0.261354    | BGIOSGA025038 | XP_015698661.1 ubiquitin carboxyl-terminal hydrolase 12-like isoform X2                     |
| TCONS_00033741 | -0.244923 | -0.140195  | -0.565855   | BGIOSGA036010 | XP_006663006.1 ADP-ribosylation factor-like protein 5                                       |
| TCONS_00027736 | -0.244914 | -0.673467  | -0.499294   | BGIOSGA027268 | XP_006660014.1 PREDICTED: uncharacterized protein LOC102703408                              |
| TCONS_00013247 | -0.244625 | -0.754448  | -0.529921   | BGIOSGA037458 | XP_015690960.1 TSL-kinase interacting protein 1                                             |
| TCONS_00021427 | -0.244577 | -1.36234   | -0.385328   | BGIOSGA023651 | XP_006657372.1 PREDICTED: uncharacterized protein LOC102703408                              |
| TCONS_00028141 | -0.244378 | -0.55386   | -0.566048   | BGIOSGA008850 | XP_015696181.1 IAA-alanine resistance protein 1 isoform X1                                  |
| TCONS_00020208 | -0.244335 | -0.438404  | 0.736654    | BGIOSGA037984 | XP_015694097.1 uncharacterized WD repeat-containing protein C2A9.03-like isoform X1         |
| TCONS_00007159 | -0.243975 | -0.463894  | -0.57014    | BGIOSGA009345 | XP_006648173.1 zinc finger CCCH domain-containing protein 19-like                           |
| TCONS_00010787 | -0.243975 | -0.196122  | 0.351227    | BGIOSGA036360 | XP_021302013.1 oxysterol-binding protein-related protein 1C                                 |
| TCONS_00028861 | -0.243802 | 1.19598    | 1.20365     | BGIOSGA030611 | XP_024316004.1 SNF1-related protein kinase regulatory subunit beta-3 isoform X2             |
| TCONS_00019893 | -0.243363 | -0.794465  | -0.47123    | BGIOSGA011530 | XP_006654852.1 probable protein phosphatase 2C 52                                           |
| TCONS_00010261 | -0.243569 | 0.669109   | -0.101683   | BGIOSGA031910 | XP_006650178.1 40S ribosomal protein SA-like                                                |
| TCONS_00015267 | -0.243551 | -0.868249  | -0.525247   | BGIOSGA015715 | XP_004975002.1 uncharacterized RNA-binding protein C17H9.04c                                |
| TCONS_00037092 | -0.243546 | 0.490237   | -0.430584   | BGIOSGA035264 | XP_006663994.2 protein transport protein Sec24-like CEF                                     |
| TCONS_00013460 | -0.243542 | 1.93267    | 3.52492     | BGIOSGA012231 | XP_006650830.1 PREDICTED: uncharacterized protein LOC102717604                              |
| TCONS_00029342 | -0.243419 | -0.39371   | -0.111473   | BGIOSGA031090 | XP_006661432.1 translation initiation factor IF-2 isoform X1                                |
| TCONS_00013294 | -0.243406 | 0.751831   | 0.337178    | BGIOSGA016678 | NP_001149996.1 expp1 protein precursor                                                      |
| TCONS_00025099 | -0.243397 | -0.884876  | 0.130622    | BGIOSGA029381 | XP_006657704.2 beta-ureidopropionase                                                        |
| TCONS_00007824 | -0.243393 | -0.158073  | -0.242837   | BGIOSGA011414 | XP_006647185.1 E3 ubiquitin-protein ligase SINAT5                                           |
| TCONS_00006315 | -0.243387 | -0.918119  | -0.947983   | BGIOSGA008480 | XP_003575213.2 protein ACTIVITY OF BC1 COMPLEX KINASE 8, chloroplast                        |
| TCONS_00005358 | -0.243317 | 0.271974   | -0.00235405 | BGIOSGA007469 | XP_015689488.1 PREDICTED: uncharacterized protein LOC102722366                              |
| TCONS_00036839 | -0.243265 | -1.64974   | -0.270234   | BGIOSGA036471 | XP_015692950.1 PREDICTED: uncharacterized protein LOC107304242                              |
| TCONS_00000403 | -0.243189 | -0.0183137 | -0.0504528  | BGIOSGA034231 | XP_006645621.2 dol-P-Man:Man(6)GlcNAc(2)-PP-Dol alpha-1,2-mannosyltransferase               |
| TCONS_00024491 | -0.243004 | 0.505866   | 0.27618     | BGIOSGA024905 | XP_015695299.1 PREDICTED: uncharacterized protein LOC102719784 isoform X1                   |
| TCONS_00033553 | -0.24296  | -1.95087   | -0.673093   | BGIOSGA035343 | XP_015697799.1 PREDICTED: uncharacterized protein LOC102699349                              |
| TCONS_00009736 | -0.242846 | 0.715275   | 0.0926063   | BGIOSGA023312 | XP_006651241.1 PREDICTED: uncharacterized protein LOC102704044                              |
| TCONS_00033289 | -0.242814 | -0.867225  | 0.159363    | BGIOSGA008042 | XP_015696174.1 pentatricopeptide repeat-containing protein At2g37320-like                   |
| TCONS_00035009 | -0.242796 | 0.194885   | 0.533681    | BGIOSGA033848 | XP_006663508.2 protein AUXIN RESPONSE 4                                                     |
| TCONS_00000657 | -0.242771 | -0.318857  | 0.0388387   | BGIOSGA019751 | XP_006644051.2 PREDICTED: uncharacterized protein LOC102708842                              |
| TCONS_00005188 | -0.242699 | 0.250618   | -0.300697   | BGIOSGA000016 | XP_006646741.1 probable dual-specificity RNA methyltransferase RimN                         |
| TCONS_00016004 | -0.242695 | -2.20132   | -0.893982   | BGIOSGA006945 | XP_015692116.1 chlorophyll a-b binding protein CP24, chloroplast                            |
| TCONS_00022274 | -0.24239  | -0.331059  | -0.357714   | BGIOSGA033285 | XP_006656094.1 serine/threonine-protein kinase fray2 isoform X1                             |
| TCONS_00034101 | -0.242327 | 0.599557   | 0.910254    | BGIOSGA036958 | XP_004978278.1 scarecrow-like protein 33                                                    |
| TCONS_00017603 | -0.241831 | 0.268768   | -0.0443759  | BGIOSGA020949 | XP_006654286.1 ERBB-3 BINDING PROTEIN 1                                                     |
| TCONS_00027488 | -0.241688 | 1.2037     | 1.18969     | BGIOSGA011492 | XP_015695984.1 putative aconitate hydratase, cytoplasmic                                    |
| TCONS_00002235 | -0.241577 | 0.526249   | -0.726088   | BGIOSGA017981 | XP_002456695.1 protein YIPF6 homolog                                                        |
| TCONS_00007889 | -0.241446 | -1.39159   | -0.97226    | BGIOSGA001229 | XP_006648597.1 ABC transporter G family member 40 isoform X1                                |
| TCONS_00003013 | -0.241446 | -1.39159   | -1.97226    | BGIOSGA017605 | XP_019707609.1 PREDICTED: uncharacterized protein LOC109506141                              |
| TCONS_00026794 | -0.241446 | #NA        | -0.97226    | BGIOSGA028855 | XP_002444531.2 SH3 domain-containing protein C23A1.17                                       |
| TCONS_00014795 | -0.241242 | 0.0260001  | 0.103689    | BGIOSGA029790 | XP_002451500.1 uncharacterized protein LOC8057532                                           |
| TCONS_00021920 | -0.241208 | 0.787778   | -0.0814008  | BGIOSGA036398 | XP_015694362.1 PREDICTED: uncharacterized protein At5g39570 isoform X2                      |
| TCONS_00027798 | -0.241031 | -0.392059  | 0.348614    | #N/A          | #N/A                                                                                        |

## transcriptome

|                |           |             |            |              |                                                                                                                                                                      |
|----------------|-----------|-------------|------------|--------------|----------------------------------------------------------------------------------------------------------------------------------------------------------------------|
| TCONS_0006993  | -0.240819 | 1.47736     | 0.27612    | BGIOGA030807 | XP_006648027.2 glutamate receptor 2.7-like<br>XP_006649227.1 cortical cell-delineating protein-like                                                                  |
| TCONS_00009134 | -0.240816 | -2.8941     | -1.26188   | BGIOGA001825 |                                                                                                                                                                      |
| TCONS_00004893 | -0.240739 | -0.599636   | -0.72919   | BGIOGA000327 | XP_004970898.1ribonuclease 2<br>XP_006664234.1PREDICTED: uncharacterized protein LOC102710832                                                                        |
| TCONS_00036491 | -0.24063  | -0.807548   | 0.262713   | BGIOGA015169 | XP_006647809.1 GPI-anchored protein LORELEI-like                                                                                                                     |
| TCONS_00008715 | -0.24063  | -0.618071   | -0.494334  | BGIOGA030041 | XP_006654075.1 E3 ubiquitin-protein ligase UPL6                                                                                                                      |
| TCONS_00017177 | -0.240614 | 0.467003    | 0.202685   | BGIOGA008077 | XP_012454889.1 regulatory-associated protein of TOR 1-like isoform X2                                                                                                |
| TCONS_00036543 | -0.24058  | 0.470334    | -0.146294  | BGIOGA019154 |                                                                                                                                                                      |
| TCONS_00020570 | -0.240454 | 0.670972    | 0.404774   | BGIOGA022748 | XP_006656912.1 proteasome activator subunit 4                                                                                                                        |
| TCONS_00006875 | -0.240436 | 0.192232    | -0.389855  | #N/A         | #N/A                                                                                                                                                                 |
| TCONS_00026367 | -0.240377 | -0.435051   | -0.131675  | BGIOGA014766 | XP_006659302.1 polyadenylate-binding protein 2-like                                                                                                                  |
| TCONS_00008287 | -0.24034  | 1.00334     | 0.847188   | BGIOGA006143 | XP_006647438.1 ribosome biogenesis protein BRX1-like                                                                                                                 |
| TCONS_00016543 | -0.240324 | 0.391963    | -0.149724  | BGIOGA005789 | XP_006652749.2PREDICTED: uncharacterized protein At1g51745-like isoform X1<br>XP_015692325.1 zinc finger BED domain-containing protein RICESLEEPER 1-like isoform X1 |
| TCONS_00016663 | -0.240172 | 0.286939    | 0.463074   | BGIOGA028099 |                                                                                                                                                                      |
| TCONS_00006444 | -0.239929 | -0.994564   | -1.3155    | BGIOGA038732 | XP_003575337.1hydroxycinnamoyltransferase 2<br>XP_006659547.1 peroxisome biogenesis protein 5 isoform X1                                                             |
| TCONS_00026881 | -0.239881 | 0.0197879   | 0.44261    | BGIOGA028937 | XP_006644166.1 dephospho-CoA kinase                                                                                                                                  |
| TCONS_00003543 | -0.239875 | 1.13019     | 1.11123    | BGIOGA001662 | XP_006649519.1 origin of replication complex subunit 2                                                                                                               |
| TCONS_00011689 | -0.239813 | 0.609414    | 0.817008   | BGIOGA011320 | XP_003578287.1protein MICROTUBULE BINDING PROTEIN 2C                                                                                                                 |
| TCONS_00029218 | -0.239695 | -0.877306   | 0.130436   | BGIOGA030960 | XP_015690314.1 ribosomal large subunit pseudouridine synthase B isoform X1                                                                                           |
| TCONS_00011585 | -0.239519 | 1.51311     | 0.0228642  | BGIOGA011875 | XP_015695743.1 geranylgeranyl transferase type 2 subunit beta-like                                                                                                   |
| TCONS_00009486 | -0.239519 | -0.393779   | 1.3921     | BGIOGA028983 | XP_006663884.1 small RNA degrading nuclease 5                                                                                                                        |
| TCONS_00035696 | -0.239464 | -0.952819   | -0.520148  | BGIOGA037111 | XP_006644372.1 N-alpha-acetyltransferase 16, NatA auxiliary subunit                                                                                                  |
| TCONS_00003989 | -0.239427 | 0.0991269   | 0.0616139  | BGIOGA025210 | XP_004970278.1basic leucine zipper 23                                                                                                                                |
| TCONS_00001993 | -0.239347 | -2.97894    | -2.1475    | BGIOGA017801 | XP_003562954.160S ribosomal protein L38                                                                                                                              |
| TCONS_00033383 | -0.239242 | 0.257989    | 0.153356   | BGIOGA020149 | XP_004979658.1acyl-coenzyme A oxidase 2, peroxisomal                                                                                                                 |
| TCONS_00017242 | -0.238936 | 2.08613     | 1.19675    | BGIOGA019284 | XP_006655360.1 fructose-1,6-bisphosphatase, cytosolic-like                                                                                                           |
| TCONS_00019368 | -0.238873 | -0.854271   | -0.646085  | BGIOGA004865 | XP_006654492.1PREDICTED: uncharacterized protein LOC102707588                                                                                                        |
| TCONS_00019411 | -0.238849 | -1.39456    | 0.828516   | BGIOGA011050 | XP_006664651.2 UNC93-like protein 3 isoform X1                                                                                                                       |
| TCONS_00037379 | -0.238849 | -0.809597   | -0.393877  | BGIOGA018911 | XP_006663025.1PREDICTED: uncharacterized protein LOC102718497                                                                                                        |
| TCONS_00033784 | -0.238838 | -0.535926   | -0.475597  | BGIOGA035638 | XP_006655599.1 sugar transporter ERD6-like 6                                                                                                                         |
| TCONS_00018328 | -0.238826 | -0.633469   | -0.286734  | BGIOGA014371 | XP_015696881.1 heat stress transcription factor B-1                                                                                                                  |
| TCONS_00029151 | -0.238788 | -0.171863   | -0.744497  | BGIOGA000790 | XP_006657769.1 succinate dehydrogenase subunit 3-2, mitochondrial                                                                                                    |
| TCONS_00005303 | -0.238533 | 0.0525273   | 0.418905   | BGIOGA025827 | XP_006647625.1 putative kinase-like protein TMKL1                                                                                                                    |
| TCONS_00008516 | -0.23835  | -3.83537    | -0.734112  | BGIOGA039122 | XP_006653058.1 receptor protein kinase TMK1-like                                                                                                                     |
| TCONS_00016909 | -0.23806  | 0.092214    | -0.337293  | BGIOGA001890 | XP_020408426.1BEL1-like homeodomain protein 1 isoform X1                                                                                                             |
| TCONS_00034345 | -0.237908 | 0.0650707   | -1.13346   | BGIOGA034831 | XP_006660281.1 LOB domain-containing protein 24-like                                                                                                                 |
| TCONS_00026951 | -0.237788 | -1.39581    | 0.0184645  | BGIOGA027887 | XP_015699083.1 receptor-like serine/threonine-protein kinase ALE2 isoform X11                                                                                        |
| TCONS_00004269 | -0.237749 | -1.89387    | -0.705057  | BGIOGA016744 | XP_006659883.1 somatic embryogenesis receptor kinase 2-like                                                                                                          |
| TCONS_00026003 | -0.237657 | -0.465879   | -1.08448   | BGIOGA021625 | XP_006646262.1 branchpoint-bridging protein                                                                                                                          |
| TCONS_00004288 | -0.23763  | -1.22539    | -0.393087  | BGIOGA000919 | XP_006662748.1 cyclin-T1-3                                                                                                                                           |
| TCONS_00033003 | -0.237414 | -0.152615   | 0.151241   | BGIOGA034839 | XP_010233840.1uncharacterized protein LOC100827700                                                                                                                   |
| TCONS_00005472 | -0.237413 | -0.354081   | 0.867405   | BGIOGA022163 | XP_006644616.1 ras-related protein Rab7                                                                                                                              |
| TCONS_00004287 | -0.237239 | -0.612196   | 0.273408   | BGIOGA003048 | XP_004975169.1F-box protein At5g49610                                                                                                                                |
| TCONS_00030638 | -0.237239 | -0.00415011 | -0.282492  | BGIOGA032467 | XP_014661075.1zinc finger protein CONSTANS-LIKE 16 isoform X1                                                                                                        |
| TCONS_00008754 | -0.237098 | -0.449504   | -0.467037  | BGIOGA028838 | XP_002453584.160S ribosomal protein L10-1                                                                                                                            |
| TCONS_00033182 | -0.237088 | 0.401793    | -0.179462  | BGIOGA010802 | XP_006654591.1 probable calcium-transporting ATPase 6, plasma membrane-type                                                                                          |
| TCONS_00018057 | -0.237038 | 0.439488    | 0.764271   | BGIOGA013123 | XP_006657904.1 WD repeat-containing protein 82-B                                                                                                                     |
| TCONS_00024015 | -0.236926 | 0.0143964   | 0.44085    | BGIOGA017583 | XP_015696218.1PREDICTED: uncharacterized protein LOC102719792                                                                                                        |
| TCONS_00026768 | -0.236674 | -5.83748    | -1.5318    | BGIOGA028830 | XP_002438777.1protein GLUTAMINE DUMPER 5                                                                                                                             |
| TCONS_00021173 | -0.236361 | 0.25455     | -0.79251   | BGIOGA004903 | XP_015690690.1 serine/threonine-protein phosphatase BSL2 homolog                                                                                                     |
| TCONS_00012822 | -0.236289 | 0.735177    | 0.167945   | BGIOGA035823 | XP_006644103.1 ATP-citrate synthase beta chain protein 1                                                                                                             |
| TCONS_00003388 | -0.236284 | -0.321902   | -1.14897   | BGIOGA001820 | XP_004976512.1protein indeterminate-domain 5, chloroplastic                                                                                                          |
| TCONS_00006623 | -0.236246 | 0.347173    | -0.0455626 | BGIOGA022584 | XP_004971312.1protein O-linked-mannose beta-1,4-N-acetylglucosaminyltransferase 2                                                                                    |
| TCONS_00005121 | -0.236211 | -0.524054   | -0.815371  | BGIOGA015952 | XP_006645966.1 condensin complex subunit 2                                                                                                                           |
| TCONS_00001076 | -0.23613  | 0.0444822   | -0.632678  | BGIOGA003695 |                                                                                                                                                                      |

transcriptome

|                |           |            |            |              |                                                                                                  |
|----------------|-----------|------------|------------|--------------|--------------------------------------------------------------------------------------------------|
| TCONS_00026640 | -0.235977 | -0.0980681 | 0.0590244  | BGOSGA028708 | XP_015695608.1 F-box protein SKIP28                                                              |
| TCONS_00023518 | -0.2359   | -0.594401  | -0.417741  | BGOSGA011101 | XP_006664839.1 synaptotagmin-5<br>XP_006657457.1 putative deoxyribonuclease                      |
| TCONS_00023141 | -0.235682 | 0.409003   | 0.598097   | BGOSGA025176 | TATDN1<br>XP_003566629.1 bifunctional phosphatase                                                |
| TCONS_00023267 | -0.235575 | -0.779572  | -0.624565  | BGOSGA025315 | IMPL2, chloroplastic isoform X2<br>XP_009343889.1 BTB/POZ and MATH domain-                       |
| TCONS_00027595 | -0.23547  | -2.39861   | 0.334527   | BGOSGA034965 | containing protein 3-like isoform X1<br>XP_015694074.1 PREDICTED: uncharacterized                |
| TCONS_00021481 | -0.235459 | -0.0459035 | -0.236596  | BGOSGA022070 | protein LOC102705438<br>XP_015689756.1 pre-mRNA-splicing factor                                  |
| TCONS_00011525 | -0.235412 | 0.184767   | -0.494514  | BGOSGA011493 | cwf23<br>XP_008353740.1 ketol-acid reductoisomerase,                                             |
| TCONS_00005446 | -0.235333 | -0.375745  | 0.0509088  | BGOSGA033486 | chloroplastic-like<br>XP_006662806.1 zinc finger CCHC domain-                                    |
| TCONS_00034470 | -0.235316 | -0.465792  | 0.371368   | BGOSGA034347 | containing protein 10-like<br>XP_006664648.1 nuclear export mediator factor                      |
| TCONS_00037372 | -0.235235 | 0.352613   | 0.369249   | BGOSGA025511 | NEMF<br>XP_015697040.1 CBS domain-containing protein                                             |
| TCONS_00031404 | -0.235164 | -0.816044  | -0.284165  | BGOSGA027116 | CBSX5-like<br>XP_015697941.1 GDP-mannose 3,5-epimerase                                           |
| TCONS_00035110 | -0.234968 | -0.814267  | 0.0113327  | BGOSGA033702 | 2 isoform X2<br>XP_015694832.1 AUGMIN subunit 3-like isoform                                     |
| TCONS_00023246 | -0.234884 | -1.22569   | -0.730713  | BGOSGA022440 | X1                                                                                               |
| TCONS_00026166 | -0.234849 | -1.57898   | 1.09805    | #N/A         | #N/A<br>XP_002463768.1 fasciclin-like arabinogalactan                                            |
| TCONS_00013300 | -0.234642 | -5.29257   | -2.30759   | BGOSGA009681 | protein 16                                                                                       |
| TCONS_00025189 | -0.234501 | -0.663544  | -0.322078  | BGOSGA025792 | XP_015694650.1 protein RRP6-like 3<br>XP_006659584.2 squamosa promoter-binding-                  |
| TCONS_00026943 | -0.234358 | -0.569276  | -0.653953  | BGOSGA019689 | like protein 15<br>XP_006655919.1 polyadenylate-binding protein 2-                               |
| TCONS_00020366 | -0.234325 | -1.03903   | -0.29639   | BGOSGA005585 | like                                                                                             |
| TCONS_00032865 | -0.234153 | -1.49335   | -0.99072   | BGOSGA017997 | XP_006658042.1 pre-mRNA-splicing factor SYF1<br>XP_006650453.1 phosphatidylinositol 4-           |
| TCONS_00010775 | -0.234151 | -0.843389  | 0.0560246  | BGOSGA005339 | phosphate 5-kinase 1 isoform X1<br>XP_006650481.1 PREDICTED: uncharacterized                     |
| TCONS_00010802 | -0.234146 | 1.26555    | 0.404469   | BGOSGA013426 | protein LOC102710004<br>XP_006654330.2 PREDICTED: uncharacterized                                |
| TCONS_00017690 | -0.234012 | 0.228121   | -0.0432021 | BGOSGA003242 | protein LOC102708337                                                                             |
| TCONS_00018317 | -0.233954 | -0.160864  | -0.0760061 | BGOSGA016586 | XP_006654796.1 urease accessory protein G<br>XP_006644339.1 serine/threonine-protein             |
| TCONS_00003704 | -0.233739 | 0.573934   | -0.151119  | BGOSGA008525 | phosphatase 7 long form homolog<br>XP_003568127.1 probable xyloglucan                            |
| TCONS_00012657 | -0.233665 | -1.26335   | -3.31388   | BGOSGA010811 | glycosyltransferase 7                                                                            |
| TCONS_00000400 | -0.233615 | -0.196515  | -0.326091  | BGOSGA002977 | XP_006643893.2 SCAR-like protein 2                                                               |
| TCONS_00020495 | -0.233613 | 0.636786   | 0.495584   | BGOSGA022665 | XP_006655991.2 autophagy-related protein 2<br>XP_006649696.1 protein NRT1/ PTR FAMILY 8.3-       |
| TCONS_00011850 | -0.233347 | -0.473578  | -0.224558  | BGOSGA009904 | like isoform X1                                                                                  |
| TCONS_00023191 | -0.233318 | 0.971319   | 0.0992934  | BGOSGA009655 | XP_015695274.1 40S ribosomal protein S18<br>XP_006657992.1 putative receptor-like protein        |
| TCONS_00025567 | -0.233085 | -0.519829  | -0.398559  | BGOSGA007810 | kinase At4g00960<br>XP_015688128.1 PREDICTED: uncharacterized                                    |
| TCONS_00003488 | -0.23306  | -0.823867  | -0.625149  | BGOSGA023071 | protein LOC102712596<br>XP_006365432.1 peroxisome biogenesis protein                             |
| TCONS_00030543 | -0.233024 | -0.811638  | 0.206935   | BGOSGA029261 | 1                                                                                                |
| TCONS_00027909 | -0.232936 | 0.405588   | -0.671859  | BGOSGA027088 | XP_006659320.1 putative methyltransferase<br>NSUN6                                               |
| TCONS_00009952 | -0.232844 | 0.434764   | 0.0637829  | BGOSGA011417 | XP_006649989.1 PREDICTED: uncharacterized                                                        |
| TCONS_00025530 | -0.232704 | 0.896684   | 0.304296   | BGOSGA011331 | protein LOC102707011 isoform X1                                                                  |
| TCONS_00026658 | -0.232669 | -2.06107   | -0.947151  | BGOSGA012745 | XP_006657956.2 40S ribosomal protein Sa-2-like<br>XP_006659435.2 probable apyrase 6              |
| TCONS_00029633 | -0.232545 | -0.176595  | 0.062449   | BGOSGA030188 | XP_006660433.1 WPP domain-associated<br>protein-like                                             |
| TCONS_00016623 | -0.232426 | -0.0794173 | -0.225588  | BGOSGA014340 | XP_003580553.1 peroxisome biogenesis protein<br>6 isoform X1                                     |
| TCONS_00010930 | -0.2324   | 0.950478   | -0.0845437 | BGOSGA012085 | XP_004981818.1 protein transport protein sec23-                                                  |
| TCONS_00034878 | -0.232115 | -0.595447  | 0.911044   | BGOSGA033453 | 1                                                                                                |
| TCONS_00009274 | -0.23184  | -0.879633  | -0.979928  | BGOSGA031707 | XP_006654102.1 auxin-responsive protein IAA15<br>XP_015691111.1 tetratricopeptide repeat protein |
| TCONS_00001469 | -0.231828 | 0.645313   | 0.472887   | BGOSGA035770 | 7A<br>XP_006644437.1 WD repeat-containing protein                                                |
| TCONS_00012635 | -0.231814 | -1.97653   | -0.805662  | BGOSGA009004 | 43<br>XP_006652053.1 PREDICTED: uncharacterized                                                  |
| TCONS_00004494 | -0.231771 | -0.358137  | -1.76447   | BGOSGA000726 | protein LOC102717235<br>XP_006644789.1 PREDICTED: uncharacterized                                |
| TCONS_00012668 | -0.231533 | 0.831535   | -0.607471  | BGOSGA017292 | protein LOC102716826<br>XP_006650286.1 UDP-arabinopyranose mutase                                |
| TCONS_00002326 | -0.231343 | -0.19042   | -1.07368   | BGOSGA004968 | 1                                                                                                |
| TCONS_00017484 | -0.231301 | 0.214317   | -0.617661  | BGOSGA019550 | XP_006645154.1 BTB/POZ and TAZ domain-                                                           |
| TCONS_00011377 | -0.231163 | 0.700594   | 1.24911    | BGOSGA013991 | containing protein 3<br>XP_006654234.1 transcription initiation factor IIA                       |
| TCONS_00023664 | -0.231028 | -0.584752  | -0.179141  | BGOSGA033392 | subunit 1-like<br>XP_012698312.1 transducin beta-like protein 2                                  |
| TCONS_00036680 | -0.231028 | -1.2887    | 0.274449   | BGOSGA036632 | XP_006657692.1 NEP1-interacting protein 2-like                                                   |
| TCONS_00019318 | -0.230991 | -0.314991  | 0.0682052  | BGOSGA004931 | isoform X2<br>XP_015698216.1 E3 ubiquitin-protein ligase EL5-                                    |
| TCONS_00036835 | -0.230975 | -0.48282   | 0.366737   | BGOSGA036474 | like<br>XP_010231359.1 tubinuclein-1 isoform X3<br>XP_006664414.1 protein SUPPRESSOR OF          |

transcriptome

|                |           |            |            |               |                                                                                              |
|----------------|-----------|------------|------------|---------------|----------------------------------------------------------------------------------------------|
| TCONS_00022200 | -0.230435 | 0.168094   | -0.0353331 | BGIOSGA008021 | XP_015694102.1 probable pre-mRNA-splicing factor ATP-dependent RNA helicase DEAH5 isoform X2 |
| TCONS_00025989 | -0.230389 | -1.42845   | -0.650581  | BGIOSGA028064 | XP_006659169.2 haloacid dehalogenase-like hydrolase domain-containing protein 3              |
| TCONS_00031443 | -0.230389 | -2.40499   | -3.00017   | BGIOSGA033261 | XP_021307167.1 uncharacterized protein LOC8065863                                            |
| TCONS_00024914 | -0.230369 | -0.762275  | -0.892844  | BGIOSGA024356 | XP_024314303.1 uncharacterized protein LOC104582301                                          |
| TCONS_00024627 | -0.230362 | -0.861443  | -0.546377  | BGIOSGA005216 | XP_015695327.1 MACPF domain-containing protein At4g24290-like                                |
| TCONS_00001743 | -0.23027  | -0.230346  | 0.113112   | BGIOSGA004379 | XP_006646279.1 ultraviolet-B receptor UVR8                                                   |
| TCONS_00011361 | -0.230258 | 0.657873   | 0.391999   | BGIOSGA022733 | XP_006650926.1 outer envelope pore protein 24, chloroplastic                                 |
| TCONS_00013271 | -0.230174 | -1.43914   | 1.29531    | BGIOSGA009715 | XP_015690095.1 ribosome-binding ATPase YchF                                                  |
| TCONS_00030186 | -0.230085 | 0.00966539 | -2.00092   | BGIOSGA005769 | XP_006660717.1 zinc-finger homeodomain protein 1                                             |
| TCONS_00014384 | -0.230027 | -0.196667  | -1.62438   | BGIOSGA027913 | XP_006652373.1 glyceraldehyde-3-phosphate dehydrogenase A, chloroplastic                     |
| TCONS_00028908 | -0.229838 | -4.40568   | -1.19418   | BGIOSGA023312 | XP_006661179.1 RING-H2 finger protein ATL46-like                                             |
| TCONS_00009771 | -0.22981  | 0.593082   | 0.0580072  | BGIOSGA012322 | XP_006649839.1 oxysterol-binding protein-related protein 3C-like                             |
| TCONS_00003193 | -0.229594 | 0.0329453  | -0.140998  | BGIOSGA002022 | XP_006645699.1 probable folate-biopterin transporter 4 isoform X1                            |
| TCONS_00000623 | -0.229491 | -2.4475    | -0.885266  | BGIOSGA003206 | XP_006644027.1 PREDICTED: uncharacterized protein LOC102701863                               |
| TCONS_00013814 | -0.22924  | -1.08451   | -0.418065  | BGIOSGA029680 | XP_003581081.2 probable LRR receptor-like serine/threonine-protein kinase At3g47570          |
| TCONS_00011540 | -0.229228 | -1.40122   | -0.496902  | BGIOSGA011485 | XP_006649378.1 PREDICTED: uncharacterized protein LOC102719843                               |
| TCONS_00031484 | -0.229099 | -1.0143    | 0.153124   | BGIOSGA016946 | XP_006661972.1 F-box protein PP2-A13-like                                                    |
| TCONS_00033901 | -0.229092 | -2.62979   | -3.60456   | BGIOSGA013536 | XP_002437334.1 premmaspirodienone oxygenase                                                  |
| TCONS_00019590 | -0.228755 | 0.0824732  | -0.292332  | BGIOSGA017769 | XP_004961588.1 sulfite reductase [ferredoxin], chloroplastic                                 |
| TCONS_00012893 | -0.228716 | -0.0285292 | 0.678562   | BGIOSGA012605 | XP_015690277.1 40S ribosomal protein S21                                                     |
| TCONS_00030335 | -0.228681 | 0.845414   | 0.671635   | BGIOSGA000224 | XP_006660046.2 60S ribosomal protein L7a                                                     |
| TCONS_00000892 | -0.228569 | -0.138022  | -0.135869  | BGIOSGA030174 | XP_015693720.1 poly [ADP-ribose] polymerase 2-A isoform X1                                   |
| TCONS_00016934 | -0.228563 | 0.236562   | -0.078714  | BGIOSGA014030 | XP_006653084.1 PREDICTED: uncharacterized protein LOC102711527                               |
| TCONS_00024810 | -0.228516 | 0.592647   | -0.267864  | BGIOSGA007636 | XP_004981250.1 dof zinc finger protein DOF2.4                                                |
| TCONS_00008916 | -0.228371 | 0.108291   | -0.418327  | BGIOSGA005013 | XP_004954115.1 subtilisin-like protease SBT1.4                                               |
| TCONS_00036633 | -0.228026 | -0.913205  | 0.17838    | BGIOSGA034547 | XP_006663799.1 dual specificity protein phosphatase 12-like                                  |
| TCONS_00009829 | -0.22793  | -0.530082  | -0.47427   | BGIOSGA036062 | XP_006649898.1 PREDICTED: uncharacterized protein LOC102704684                               |
| TCONS_00037447 | -0.227409 | 1.19578    | 0.967176   | BGIOSGA007378 | XP_021317519.1 uncharacterized protein LOC8076351 isoform X1                                 |
| TCONS_00020383 | -0.227385 | 0.650115   | 0.729329   | BGIOSGA009998 | XP_006656798.1 PREDICTED: uncharacterized protein LOC102703693, partial                      |
| TCONS_00012525 | -0.227116 | 0.184024   | 0.519822   | BGIOSGA017281 | XP_006650232.1 ABC transporter F family member 4                                             |
| TCONS_00010482 | -0.227068 | -2.08725   | -1.10153   | BGIOSGA013086 | XP_006650284.1 cytochrome P450 85A1                                                          |
| TCONS_00027999 | -0.227001 | -0.409261  | -2.00859   | BGIOSGA015274 | XP_004959674.1 F-box protein At3g26160                                                       |
| TCONS_00007216 | -0.226988 | 0.448704   | -0.549187  | BGIOSGA016824 | NP_001183350.2 uncharacterized protein LOC100501758                                          |
| TCONS_00024266 | -0.22655  | 0.584327   | -0.174732  | BGIOSGA035389 | XP_006658058.2 protein transport protein SEC31 homolog B                                     |
| TCONS_00008735 | -0.22651  | 1.2585     | -0.687875  | BGIOSGA030958 | XP_006647828.2 transcription factor BIM2-like isoform X2                                     |
| TCONS_00014612 | -0.226489 | 0.290535   | 0.00509624 | BGIOSGA030526 | XP_015692282.1 pentatricopeptide repeat-containing protein At1g77360, mitochondrial-like     |
| TCONS_00025650 | -0.226375 | 0.580257   | 0.51807    | BGIOSGA012622 | XP_006658068.1 protein CHROMATIN REMODELING 5 isoform X2                                     |
| TCONS_00015924 | -0.226359 | -1.41007   | -2.42521   | BGIOSGA006264 | XP_015692131.1 protein disulfide isomerase-like 1-2                                          |
| TCONS_00026139 | -0.2262   | 0.642843   | -0.0470935 | BGIOSGA000133 | XP_004972551.1 glucan endo-1,3-beta-glucosidase 6                                            |
| TCONS_00025351 | -0.226182 | 0.107558   | 0.159313   | BGIOSGA024080 | XP_006657846.1 PREDICTED: uncharacterized protein LOC102704628                               |
| TCONS_00029122 | -0.226147 | 0.941826   | 1.27179    | BGIOSGA029662 | XP_015698225.1 F-box protein At3g07870-like                                                  |
| TCONS_00017076 | -0.226037 | -0.17487   | -0.502247  | BGIOSGA006973 | XP_006654012.1 probable protein phosphatase 2C 47                                            |
| TCONS_00036745 | -0.225945 | -0.487359  | -0.22412   | BGIOSGA034877 | XP_006663851.1 protein FAM135B-like isoform X1                                               |
| TCONS_00003764 | -0.225881 | 0.759256   | 0.211035   | BGIOSGA001441 | XP_006645990.1 PREDICTED: uncharacterized protein LOC102722172 isoform X1                    |
| TCONS_00008479 | -0.22558  | 0.25481    | 0.130463   | BGIOSGA033193 | XP_015688676.1 autophagy-related protein 13a                                                 |
| TCONS_00026083 | -0.225643 | -0.352074  | -0.137475  | BGIOSGA034318 | XP_015695725.1 F-box/LRR-repeat protein At1g55660-like isoform X2                            |
| TCONS_00001701 | -0.225476 | -0.352284  | -1.72285   | BGIOSGA013714 | XP_015688192.1 type IV inositol polyphosphate 5-phosphatase 3 isoform X1                     |
| TCONS_00030779 | -0.225424 | 0.910686   | -0.597446  | BGIOSGA012056 | XP_015697457.1 nucleolin-like isoform X3                                                     |
| TCONS_00027358 | -0.225368 | 0.57054    | 0.548094   | BGIOSGA028034 | XP_006659839.1 pentatricopeptide repeat-containing protein At4g16835, mitochondrial          |
| TCONS_00030329 | -0.225278 | -1.04886   | -0.913308  | BGIOSGA016744 | XP_015696485.1 nucleotide pyrophosphatase/phosphodiesterase-like                             |
| TCONS_00036500 | -0.225189 | -0.546467  | 0.168266   | BGIOSGA037869 | XP_006664786.2 mediator of RNA polymerase II transcription subunit 17                        |
| TCONS_00007197 | -0.225069 | 0.551786   | 0.793995   | BGIOSGA007299 | XP_015694814.1 U3 small nucleolar RNA-associated protein 6 homolog                           |
| TCONS_00029520 | -0.224959 | 0.465163   | 0.204792   | BGIOSGA014476 | XP_006660982.1 probable protein S-acyltransferase 19                                         |

## transcriptome

|                |           |             |             |               |                                                                                                              |
|----------------|-----------|-------------|-------------|---------------|--------------------------------------------------------------------------------------------------------------|
| TCONS_00006311 | -0.224884 | 0.432832    | -0.708961   | BGIOSGA016517 | XP_004952853.1 cryptochrome-1 isoform X1                                                                     |
| TCONS_00034097 | -0.224865 | 0.721912    | -0.183788   | BGIOSGA018951 | XP_006663689.1 scarecrow-like protein 34<br>XP_015691419.1 methyltransferase-like protein 13                 |
| TCONS_00014078 | -0.224781 | 0.784348    | 1.25895     | BGIOSGA016229 | XP_015693829.1 RPM1-interacting protein 4-like isoform X2                                                    |
| TCONS_00020541 | -0.224677 | -0.286696   | -0.58433    | BGIOSGA030368 | XP_006645004.1 probable mannose-1-phosphate guanylyltransferase 3                                            |
| TCONS_00002164 | -0.224353 | -1.63601    | -0.141768   | BGIOSGA011034 | XP_006659725.1 protein odr-4 homolog                                                                         |
| TCONS_00030831 | -0.224282 | -1.07403    | -0.736349   | BGIOSGA027830 | XP_006658008.1 cytochrome P450 709B2-like                                                                    |
| TCONS_00024173 | -0.22404  | 0.423524    | -0.550227   | BGIOSGA021755 | XP_006653160.1 bifunctional L-3-cyanoalanine synthase/cysteine synthase 1, mitochondrial                     |
| TCONS_00015355 | -0.223966 | -1.79939    | -1.94431    | BGIOSGA000001 |                                                                                                              |
| TCONS_00036906 | -0.223925 | 0.1153      | -0.0887454  | BGIOSGA007448 | XP_006663922.1 transcription factor HBP-1a-like<br>NP_001310439.1 uncharacterized<br>LOC103640569            |
| TCONS_00037472 | -0.223893 | -0.201445   | -0.215404   | BGIOSGA020656 | XP_004951470.2 receptor kinase-like protein Xa21                                                             |
| TCONS_00005665 | -0.223875 | -0.80175    | -0.900821   | BGIOSGA007787 | XP_003567336.1 tubinuclein-1 isoform X2                                                                      |
| TCONS_00002293 | -0.223872 | -0.560157   | -0.323885   | BGIOSGA017686 | XP_006660801.1 60S ribosomal protein L32-1                                                                   |
| TCONS_00030313 | -0.222971 | 0.174228    | -0.124391   | BGIOSGA029026 | XP_003569538.4 UDP-glycosyltransferase 73C1                                                                  |
| TCONS_00000299 | -0.222932 | -0.362705   | -1.16376    | BGIOSGA004408 | XP_006660801.1 60S ribosomal protein L32-1                                                                   |
| TCONS_00030315 | -0.222795 | 0.155304    | 0.312858    | BGIOSGA029026 | XP_006647797.1 outer envelope pore protein 16-3, chloroplastic/mitochondrial-like                            |
| TCONS_00006756 | -0.222769 | 0.357357    | 0.654444    | BGIOSGA008925 | XP_015692234.1 acyl-coenzyme A thioesterase 8 isoform X2                                                     |
| TCONS_00014732 | -0.222694 | -1.28305    | -0.218748   | BGIOSGA016909 | XP_003564374.2 sulfite exporter TauE/SafE family protein 5                                                   |
| TCONS_00004535 | -0.222678 | 0.155731    | -0.375648   | BGIOSGA000681 | XP_006653780.2 signal recognition particle 14 kDa protein                                                    |
| TCONS_00014976 | -0.222483 | -0.268451   | 0.158511    | BGIOSGA017165 | XP_006646694.1 probable NAD kinase 1                                                                         |
| TCONS_00002557 | -0.222451 | -0.204824   | -0.0979724  | BGIOSGA019788 | XP_015688962.1 amino acid permease 3-like                                                                    |
| TCONS_00005215 | -0.22245  | -1.76123    | -0.786301   | BGIOSGA021612 | XP_015692349.1 PREDICTED: uncharacterized protein LOC107304147                                               |
| TCONS_00016205 | -0.222412 | -0.232467   | -0.7575     | BGIOSGA029629 | XP_006645415.1 dnaJ protein P58IPK homolog                                                                   |
| TCONS_00007529 | -0.222279 | -0.295201   | 0.288534    | BGIOSGA005288 | XP_010941352.1 probable protein phosphatase 2C 79 isoform X2                                                 |
| TCONS_00005201 | -0.222039 | -0.14318    | -0.00258457 | BGIOSGA020522 | XP_006653074.1 small glutamine-rich tetra-ricopeptide repeat-containing protein                              |
| TCONS_00015220 | -0.22168  | -0.100006   | 0.490989    | BGIOSGA017400 |                                                                                                              |
| TCONS_00011182 | -0.221227 | 1.02429     | 0.190487    | BGIOSGA025573 | XP_006650764.1 40S ribosomal protein S2-4-like                                                               |
| TCONS_00020316 | -0.22095  | -0.014649   | -0.127775   | BGIOSGA022511 | NP_001148368.2 gb protein<br>XP_010102136.1 hypothetical protein L484_021370                                 |
| TCONS_00001829 | -0.220835 | -1.61091    | -0.528405   | BGIOSGA017552 | XP_006654843.1 PREDICTED: uncharacterized protein LOC102715021                                               |
| TCONS_00018386 | -0.22073  | 0.616616    | 0.345062    | BGIOSGA020438 | XP_006648050.1 two-component response regulator ORR23                                                        |
| TCONS_00008968 | -0.220671 | -0.93841    | -0.195277   | BGIOSGA012149 | XP_006649413.1 cell division control protein 48 homolog E-like                                               |
| TCONS_00011580 | -0.220477 | 0.332045    | -0.0663437  | BGIOSGA006908 |                                                                                                              |
| TCONS_00000007 | -0.220038 | -0.500611   | -0.387656   | BGIOSGA002576 | XP_006643625.1 sphingosine-1-phosphate lyase                                                                 |
| TCONS_00011418 | -0.219997 | 0.182589    | 0.222611    | BGIOSGA011606 | XP_015691213.1 SKP1-like protein 21                                                                          |
| TCONS_00020959 | -0.219945 | 0.331201    | -2.12657    | #N/A          | #N/A                                                                                                         |
| TCONS_00000271 | -0.219799 | -0.69686    | -1.00483    | BGIOSGA002851 | XP_015691963.1 probable staphylococcal-like nuclease CAN1                                                    |
| TCONS_00023257 | -0.219767 | -1.79211    | -2.27068    | BGIOSGA025298 | XP_006657520.1 peptidyl-prolyl cis-trans isomerase FKBP16-4, chloroplastic                                   |
| TCONS_00003763 | -0.219757 | -0.00467575 | -0.0376802  | BGIOSGA032220 | XP_015688978.1 protein MICRORCHIDIA 6-like<br>XP_006662146.1 PREDICTED: uncharacterized protein LOC102714587 |
| TCONS_00031744 | -0.219545 | -1.62175    | -1.03029    | BGIOSGA011145 |                                                                                                              |
| TCONS_00006675 | -0.219397 | 0.564327    | 0.0630083   | BGIOSGA008843 | XP_002454449.1 AP-2 complex subunit mu                                                                       |
| TCONS_00024037 | -0.219348 | -0.65796    | 0.81447     | BGIOSGA026075 | XP_006657915.1 EID1-like F-box protein 2                                                                     |
| TCONS_00010239 | -0.219313 | -0.349962   | 0.130164    | BGIOSGA026265 | XP_006650168.1 CLK4-associating serine/arginine rich protein                                                 |
| TCONS_00014585 | -0.219248 | 0.268342    | 0.29005     | BGIOSGA016749 | XP_015692372.1 putative G3BP-like protein isoform X2                                                         |
| TCONS_00032124 | -0.219198 | 0.0592673   | 0.0232237   | BGIOSGA032011 | XP_003564341.1 red chlorophyll catabolite reductase isoform X2                                               |
| TCONS_00030009 | -0.218953 | -0.477909   | -0.902256   | BGIOSGA013197 | XP_015696468.1 TPR repeat-containing thioredoxin TDX                                                         |
| TCONS_00004280 | -0.218848 | -1.31742    | -1.06625    | BGIOSGA014577 | XP_004969732.1 cytidine deaminase 1                                                                          |
| TCONS_00016596 | -0.218815 | 0.40654     | 0.214309    | BGIOSGA014369 | XP_006653757.1 probable RNA-binding protein 19                                                               |
| TCONS_00037480 | -0.218744 | -2.01857    | -1.61837    | BGIOSGA028533 | XP_004963109.1 CBL-interacting protein kinase 4                                                              |
| TCONS_00015224 | -0.218716 | -0.203948   | 0.536662    | BGIOSGA035129 | XP_006653077.2 protein NRT1/ PTR FAMILY 5.10-like                                                            |
| TCONS_00017266 | -0.218704 | 0.118276    | -0.125474   | BGIOSGA019308 | XP_006654130.1 nodulin homeobox                                                                              |
| TCONS_00013272 | -0.218462 | -0.103782   | 0.141375    | BGIOSGA009714 | XP_006650681.1 probable ribose-5-phosphate isomerase 4, chloroplastic isoform X1                             |
| TCONS_00027166 | -0.218419 | 1.09349     | 1.0834      | BGIOSGA022008 | XP_003573227.1 monothiol glutaredoxin-S10                                                                    |
| TCONS_00009729 | -0.218355 | 1.02319     | -0.211957   | BGIOSGA024122 | XP_006649796.1 putative serine/threonine-protein kinase                                                      |
| TCONS_00036309 | -0.21832  | -0.201476   | -0.0344584  | BGIOSGA011183 | XP_015698528.1 probable polyamine transporter At3g19553                                                      |
| TCONS_00019934 | -0.218288 | 0.0635626   | 0.0347082   | BGIOSGA022119 | XP_015694145.1 PREDICTED: uncharacterized protein LOC102710214 isoform X3                                    |
| TCONS_00026707 | -0.217839 | 0.255645    | -0.204802   | BGIOSGA028770 | XP_006660180.1 conserved oligomeric Golgi complex subunit 3 isoform X1                                       |
| TCONS_00026792 | -0.217577 | -0.689401   | -0.980636   | BGIOSGA028854 | XP_006659500.1 PREDICTED: uncharacterized protein LOC102711723 isoform X2                                    |

## transcriptome

|                |           |             |            |                |                                                                                         |
|----------------|-----------|-------------|------------|----------------|-----------------------------------------------------------------------------------------|
| TCONS_00019469 | -0.21756  | -1.23942    | -0.824482  | BGIOSGA010931  | XP_008649737.1protein MALE DISCOVERER 2 isoform X3                                      |
| TCONS_00007354 | -0.217237 | -0.650959   | -0.615542  | BGIOSGA023521  | XP_006646892.1PREDICTED: uncharacterized protein LOC102713517                           |
| TCONS_00000506 | -0.217092 | -0.4052     | 0.414783   | BGIOSGA003079  | XP_006647767.1 chromatin modification-related protein MEAF6                             |
| TCONS_00030434 | -0.216856 | -0.313591   | -0.0643987 | BGIOSGA029368  | XP_015696717.1 DNA-(apurinic or apyrimidinic site) lyase 2 isoform X1                   |
| TCONS_00001790 | -0.216655 | -1.31888    | -0.344906  | BGIOSGA002188  | XP_006644678.1 putative dual specificity protein phosphatase DSP8                       |
| TCONS_00039529 | -0.216627 | -0.393979   | 0.674503   | BGIOSGA039356  | YP_008815761.1photosystem I assembly protein ycf4 (plastid)                             |
| TCONS_00035008 | -0.216525 | 0.728182    | 0.0765922  | BGIOSGA033849  | XP_008679455.1transportin MOS14                                                         |
| TCONS_00014430 | -0.216468 | -0.0153887  | 1.612      | BGIOSGA016588  | XP_006652402.1PREDICTED: uncharacterized protein LOC102719483                           |
| TCONS_00013212 | -0.216415 | -5.1156     | -0.658884  | BGIOSGA027891  | XP_006650629.1 peamaclein-like                                                          |
| TCONS_00013716 | -0.216364 | 0.234503    | -0.297459  | BGIOSGA007562  | XP_015692158.1 ATG8-interacting protein 1-like                                          |
| TCONS_00006121 | -0.216341 | -0.849468   | 0.0178537  | #N/A           | XP_006647275.2 ubiquitin-like modifier-activating enzyme 5                              |
| TCONS_00005605 | -0.216324 | -0.167686   | 0.118644   | BGIOSGA007718  | XP_006646996.2PREDICTED: uncharacterized protein LOC102719552                           |
| TCONS_00003327 | -0.216277 | -0.0198186  | 0.319895   | BGIOSGA013187  | XP_006644066.1 ERF1 exoribonuclease 2-like                                              |
| TCONS_00009212 | -0.216209 | 0.211167    | 0.651998   | BGIOSGA027975  | XP_006649295.1 nascent polypeptide-associated complex subunit alpha-like protein 1      |
| TCONS_00015434 | -0.216163 | 0.14712     | -0.066106  | BGIOSGA000853  | XP_006652106.1 G-type lectin S-receptor-like serine/threonine-protein kinase RLK1       |
| TCONS_00000511 | -0.215632 | -1.56653    | -0.720331  | BGIOSGA029435  | XP_008806757.1 probable pectinesterase/pectinesterase inhibitor 34                      |
| TCONS_00020791 | -0.215559 | 0.765821    | 0.936902   | BGIOSGA022989  | XP_006656998.1PREDICTED: uncharacterized protein LOC102717626                           |
| TCONS_00026989 | -0.215508 | 0.360387    | 1.04293    | BGIOSGA027180  | XP_006659592.1 FHA domain-containing protein FHA2 isoform X1                            |
| TCONS_00012563 | -0.215497 | -0.571107   | -0.032066  | BGIOSGA010411  | XP_006650263.1 purple acid phosphatase 18 isoform X1                                    |
| TCONS_00023916 | -0.215256 | 0.84113     | 0.300052   | BGIOSGA025949  | XP_015695376.1 elongator complex protein 1                                              |
| TCONS_00021746 | -0.215145 | -1.29184    | -0.55689   | BGIOSGA009200  | XP_006655855.2 ubiquitin carboxyl-terminal hydrolase 23                                 |
| TCONS_00011952 | -0.215107 | 1.87309     | 1.10495    | BGIOSGA011059  | XP_006649791.1 splicing factor 3A subunit 2                                             |
| TCONS_00002660 | -0.214866 | -0.465992   | 0.0224206  | BGIOSGA002561  | XP_006663462.2 probable 3-beta-hydroxysteroid-Delta(8),Delta(7)-isomerase               |
| TCONS_00000794 | -0.214715 | -0.698734   | -0.111845  | BGIOSGA003386  | XP_003567621.1 protein FAM192A                                                          |
| TCONS_00003310 | -0.214514 | -0.259068   | 0.516085   | BGIOSGA015647  | XP_006644052.1 protein argonaute 4A                                                     |
| TCONS_00004334 | -0.214331 | -0.153345   | 0.123271   | BGIOSGA016023  | XP_015695404.1 F-box/FBD/LRR-repeat protein At1g13570-like isoform X1                   |
| TCONS_00032710 | -0.214317 | -0.543699   | -1.40328   | BGIOSGA024221  | XP_006662604.2 transcription factor DIVARICATA-like                                     |
| TCONS_00034198 | -0.214253 | -1.87516    | -1.17714   | BGIOSGA030403  | XP_006662689.1 vacuolar protein sorting-associated protein 32 homolog 2-like isoform X3 |
| TCONS_00021906 | -0.214187 | -0.262608   | -1.15699   | BGIOSGA021322  | XP_015693851.1 sphinganine C4-monoxygenase 1-like                                       |
| TCONS_00002936 | -0.213864 | 0.75665     | -0.736695  | BGIOSGA0002288 | XP_004968380.1transcription factor HY5                                                  |
| TCONS_00016513 | -0.21367  | 0.459593    | 0.312045   | BGIOSGA021330  | XP_006652719.1 AT-hook motif nuclear-localized protein 10-like                          |
| TCONS_00011323 | -0.213546 | 0.0634631   | 0.629723   | BGIOSGA023266  | XP_022683262.1uncharacterized protein LOC101757873 isoform X1                           |
| TCONS_00010848 | -0.213439 | 2.48903     | 0.137971   | BGIOSGA021785  | XP_015691127.1 glutamate decarboxylase 1                                                |
| TCONS_00022640 | -0.213417 | 0.413448    | 0.850876   | BGIOSGA030213  | NP_001149805.1CUE domain containing protein                                             |
| TCONS_00016115 | -0.21335  | 0.721227    | 0.695069   | BGIOSGA029175  | XP_006652424.1 protein-L-isoaspartate O-methyltransferase                               |
| TCONS_00003390 | -0.213026 | -0.490733   | 0.205663   | BGIOSGA006860  | XP_003567580.1pentatricopeptide repeat-containing protein At4g01990, mitochondrial      |
| TCONS_00011998 | -0.212987 | -0.00172698 | 2.51994    | BGIOSGA004688  | XP_004984730.1E3 ubiquitin-protein ligase XB3                                           |
| TCONS_00017692 | -0.212762 | -0.884804   | -0.452236  | BGIOSGA019753  | XP_015692578.1 peptide chain release factor PrfB3, chloroplastic                        |
| TCONS_00017968 | -0.212686 | -0.639837   | 0.250805   | BGIOSGA006455  | XP_008656382.1UTP-glucose-1-phosphate uridylyltransferase 3, chloroplastic              |
| TCONS_00006020 | -0.212634 | 0.0877975   | -0.372765  | BGIOSGA034610  | XP_010237945.1uncharacterized protein LOC100822671                                      |
| TCONS_00008294 | -0.212347 | 1.83539     | 0.573016   | BGIOSGA014885  | XP_006647446.1 protein NBR1 homolog                                                     |
| TCONS_00026095 | -0.21222  | -1.23837    | -0.234077  | BGIOSGA038523  | XP_015695987.1 probable LRR receptor-like serine/threonine-protein kinase At1g56140     |
| TCONS_00023924 | -0.212052 | -1.09648    | -0.0390198 | BGIOSGA025957  | XP_015694689.1 peptidyl-prolyl cis-trans isomerase CYP37, chloroplastic                 |
| TCONS_00009245 | -0.212001 | -0.555561   | -0.438156  | BGIOSGA030655  | XP_015689753.1 probable serine/threonine-protein kinase Cx32, chloroplastic             |
| TCONS_00025766 | -0.211957 | 1.27071     | 0.330316   | BGIOSGA010705  | XP_015695979.1 ENHANCER OF AG-4 protein 2-like                                          |
| TCONS_00028678 | -0.211878 | -0.169036   | -0.884597  | BGIOSGA000451  | XP_015696803.1 transcription factor TGA2-like isoform X1                                |
| TCONS_00014310 | -0.211777 | -0.512414   | -0.916904  | BGIOSGA019011  | NP_001336775.1uncharacterized LOC100194096                                              |
| TCONS_00007258 | -0.211524 | 0.0389268   | -0.11985   | BGIOSGA008530  | XP_010233736.1 bromodomain-containing protein 4 isoform X2                              |
| TCONS_00029269 | -0.211137 | -0.291522   | -0.848956  | BGIOSGA020364  | XP_006660779.1 splicing factor U2af small subunit A                                     |
| TCONS_00022053 | -0.210887 | 0.383063    | -1.43057   | BGIOSGA012168  | XP_004965227.1putative U-box domain-containing protein 42                               |
| TCONS_00011261 | -0.210265 | 0.0603732   | -1.0092    | BGIOSGA004154  | XP_021314601.1mannan endo-1,4-beta-mannosidase 3                                        |
| TCONS_00022849 | -0.210175 | 0.579308    | 0.397007   | BGIOSGA009856  | XP_015693694.1 serrate RNA effector molecule-like                                       |
| TCONS_00026890 | -0.210092 | -0.153654   | 0.0360839  | BGIOSGA028947  | XP_003574734.1mediator of RNA polymerase II transcription subunit 15                    |
| TCONS_00025393 | -0.210041 | -0.246639   | 0.484718   | BGIOSGA013396  | XP_006658727.1 importin-5                                                               |

transcriptome

|                |           |            |            |               |                                                                                        |
|----------------|-----------|------------|------------|---------------|----------------------------------------------------------------------------------------|
| TCONS_00024013 | -0.209949 | -1.15056   | 0.842045   | BGIOSGA025841 | XP_004958181.1LOB domain-containing protein 37                                         |
| TCONS_00036279 | -0.20992  | -0.636717  | -0.304465  | BGIOSGA037637 | XP_006664657.1 cleavage stimulation factor subunit 77 isoform X3                       |
| TCONS_00022906 | -0.209918 | -0.210085  | -1.26128   | BGIOSGA012283 | XP_004966442.1WAS protein family homolog 2                                             |
| TCONS_00034253 | -0.20974  | 0.115169   | 0.279554   | BGIOSGA036634 | XP_006662722.1 proteasome-associated protein ECM29 homolog isoform X1                  |
| TCONS_00009357 | -0.209327 | 0.780815   | 0.908634   | BGIOSGA017091 | XP_015690892.1 serine/threonine-protein kinase EDR1-like                               |
| TCONS_00005564 | -0.209003 | -0.988261  | -1.30168   | BGIOSGA000247 | XP_015688396.1PREDICTED: uncharacterized protein LOC102715728                          |
| TCONS_00024374 | -0.208586 | 0.0770389  | 0.39367    | BGIOSGA008697 | XP_006658151.1 short-chain dehydrogenase/reductase 2b-like isoform X1                  |
| TCONS_00004231 | -0.208518 | -1.75676   | -1.66111   | BGIOSGA004282 | XP_006644535.2 putative D-cysteine desulphydrase 2, mitochondrial                      |
| TCONS_00000214 | -0.208316 | -0.934386  | -0.432297  | BGIOSGA002793 | XP_006643761.1 very-long-chain (3R)-3-hydroxyacyl-CoA dehydratase PASTICCINO 2A        |
| TCONS_00005330 | -0.208308 | 0.436754   | 0.00143095 | #N/A          | XP_006659604.2 auxin response factor 21                                                |
| TCONS_00028318 | -0.208151 | -0.204325  | -0.123912  | BGIOSGA035840 | XP_006655239.1 beta-glucosidase 20-like                                                |
| TCONS_00017655 | -0.208141 | -0.467842  | -0.951387  | BGIOSGA003041 | XP_015689971.1 protein OSB1, mitochondrial-like                                        |
| TCONS_00012715 | -0.208137 | -0.639297  | -0.0240491 | BGIOSGA000111 | XP_006643766.1 histone H2B.5                                                           |
| TCONS_00000210 | -0.20807  | 0.429836   | -0.444861  | BGIOSGA030551 | XP_006646857.2 WD repeat-containing protein 11-like                                    |
| TCONS_00005373 | -0.207637 | -0.29274   | -0.305194  | BGIOSGA007484 | XP_015691220.1 importin-4 isoform X2                                                   |
| TCONS_00011945 | -0.207622 | 1.31409    | 0.393086   | BGIOSGA020300 | NP_001151705.1disease resistance response protein 206                                  |
| TCONS_00022980 | -0.207542 | -1.7672    | -0.496121  | BGIOSGA035005 | XP_024313641.1UDP-glycosyltransferase 83A1-like                                        |
| TCONS_00010985 | -0.207302 | -0.0796989 | -0.326509  | BGIOSGA030717 | XP_015690732.1 beta-glucosidase BoGH3B-like                                            |
| TCONS_00010961 | -0.207202 | -1.49578   | -0.593649  | BGIOSGA013561 | XP_006655983.1 putative 1-phosphatidylinositol-3-phosphate 5-kinase FAB1C              |
| TCONS_00022010 | -0.207106 | -0.526464  | 0.152936   | BGIOSGA029492 | XP_004980973.1probable carbohydrate esterase At4g34215                                 |
| TCONS_00011375 | -0.207062 | -2.77744   | -1.10307   | BGIOSGA015440 | XP_006649805.1PREDICTED: uncharacterized protein LOC102701899                          |
| TCONS_00011963 | -0.206952 | -1.07053   | 0.432953   | BGIOSGA017943 | XP_015691106.1PREDICTED: uncharacterized protein LOC102710767                          |
| TCONS_00009440 | -0.20692  | -0.600211  | -1.40839   | BGIOSGA011988 | XP_015697366.1 probable methyltransferase PMT18                                        |
| TCONS_00031445 | -0.206879 | 0.18273    | -0.158744  | BGIOSGA000319 | XP_015694027.1 glutamate receptor 2.8-like                                             |
| TCONS_00021769 | -0.206765 | -0.20546   | 0.719387   | BGIOSGA026866 | XP_015696330.1 potassium transporter 23                                                |
| TCONS_00029946 | -0.206602 | -0.655033  | -0.353554  | BGIOSGA019299 | XP_003572041.1GDSL esterase/lipase At5g45910                                           |
| TCONS_00005782 | -0.206542 | -1.35221   | -0.893821  | BGIOSGA019126 | XP_015694825.1 armadillo repeat-containing protein LFR                                 |
| TCONS_00024079 | -0.206506 | -0.349119  | 0.379816   | BGIOSGA026275 | XP_004967657.1putative disease resistance RPP13-like protein 3                         |
| TCONS_00001297 | -0.206474 | -1.46725   | -0.311012  | BGIOSGA027867 | XP_014754963.1dentin sialophosphoprotein                                               |
| TCONS_00002038 | -0.206397 | 0.386798   | -0.27878   | BGIOSGA004672 | XP_006654848.1 mitochondrial adenine nucleotide transporter ADNT1                      |
| TCONS_00019889 | -0.206076 | -0.581218  | 0.137031   | BGIOSGA017473 | XP_006654445.1PREDICTED: uncharacterized protein At5g49945-like                        |
| TCONS_00017866 | -0.205916 | 0.357117   | -0.0415053 | BGIOSGA009826 | XP_015692358.1PREDICTED: uncharacterized protein LOC102705158                          |
| TCONS_00016226 | -0.205818 | -0.219221  | -0.236103  | BGIOSGA011834 | XP_015690101.1 nuclear pore complex protein NUP1-like                                  |
| TCONS_00011095 | -0.205679 | 1.87484    | -0.0729453 | BGIOSGA013695 | XP_006645818.1 UDP-glucuronic acid decarboxylase 2                                     |
| TCONS_00003432 | -0.205574 | 1.88663    | 0.443954   | BGIOSGA009184 | XP_006659598.1 ras-related protein RABA5c-like                                         |
| TCONS_00028338 | -0.205346 | -0.712775  | -1.39826   | BGIOSGA008711 | XP_006658733.1 probable succinyl-CoA ligase [ADP-forming] subunit alpha, mitochondrial |
| TCONS_00023973 | -0.205242 | 0.462143   | 0.268788   | BGIOSGA030566 | XP_006650297.1PREDICTED: uncharacterized protein LOC102704131                          |
| TCONS_00010466 | -0.205061 | -1.16568   | 0.419272   | BGIOSGA034994 | XP_012698798.1lysine-specific demethylase JM30 isoform X1                              |
| TCONS_00030258 | -0.20494  | 1.32853    | 1.47109    | BGIOSGA022251 | XP_002464098.2ADP-ribosylation factor-like protein 2 isoform X2                        |
| TCONS_00007909 | -0.204856 | -0.902017  | -0.182328  | BGIOSGA025403 | XP_004976873.1CAP-Gly domain-containing linker protein 1                               |
| TCONS_00016649 | -0.204694 | 0.441751   | -0.538546  | BGIOSGA024983 | XP_006646499.1 sorting nexin 1                                                         |
| TCONS_00004770 | -0.204619 | 0.582551   | 0.655215   | BGIOSGA000445 | XP_006649326.2 glyceraldehyde-3-phosphate dehydrogenase GAPB, chloroplast              |
| TCONS_00009238 | -0.204613 | -0.170771  | -1.1938    | BGIOSGA020719 | XP_006647914.1PREDICTED: uncharacterized protein LOC102708495 isoform X1               |
| TCONS_00006895 | -0.204559 | -0.993874  | 0.40714    | BGIOSGA009073 | XP_006652149.2 tRNA-dihydrouridine(20/20a) synthase-like                               |
| TCONS_00015540 | -0.204536 | -0.635663  | -0.756079  | BGIOSGA015437 | XP_015698512.1 probable LRR receptor-like serine/threonine-protein kinase At1g06840    |
| TCONS_00005131 | -0.204524 | -1.35144   | -0.678988  | BGIOSGA000591 | XP_006651442.1 tRNA pseudouridine(38/39) synthase                                      |
| TCONS_00010194 | -0.204515 | 0.286179   | -0.312861  | BGIOSGA012760 | XP_006646087.1 carbon catabolite repressor protein 4 homolog 6                         |
| TCONS_00003965 | -0.204456 | -0.501821  | 0.267504   | BGIOSGA001225 | XP_015694433.1 dehydrolipichyl diphosphate synthase 6                                  |
| TCONS_00024069 | -0.204327 | -1.30837   | -0.177263  | BGIOSGA022383 | XP_015699114.1 neutral ceramidase                                                      |
| TCONS_00004013 | -0.204207 | -0.0893749 | 0.0290967  | BGIOSGA001179 | XP_015696370.1 gamma-tubulin complex component 3                                       |
| TCONS_00029108 | -0.204188 | 0.490861   | 0.440057   | BGIOSGA030861 | XP_006659497.1 patatin-like protein 2                                                  |
| TCONS_00028174 | -0.204154 | 0.446189   | 0.242637   | BGIOSGA037557 | XP_015689532.1 transmembrane 9 superfamily member 1-like                               |
| TCONS_00006251 | -0.204126 | 0.237009   | -0.868933  | BGIOSGA008412 |                                                                                        |



transcriptome

|                |           |            |             |               |                                                                                                                 |
|----------------|-----------|------------|-------------|---------------|-----------------------------------------------------------------------------------------------------------------|
| TCONS_00035715 | -0.203958 | -0.342555  | -0.00312523 | BGIOSGA013887 | XP_015698666.1 translocase of chloroplast 90, chloroplastic<br>XP_006660672.2 probable potassium transporter 17 |
| TCONS_00029116 | -0.203699 | -0.598642  | -0.714071   | BGIOSGA028182 | XP_006643995.1 germin-like protein 5-1                                                                          |
| TCONS_00003224 | -0.203458 | -4.20954   | -0.965473   | BGIOSGA034439 | XP_006660478.1 protein NEDD1                                                                                    |
| TCONS_00028651 | -0.203316 | -0.192851  | -0.103103   | BGIOSGA030403 | XP_006656381.2PREDICTED: uncharacterized protein LOC102712822                                                   |
| TCONS_00022781 | -0.203245 | -0.501299  | -0.0162033  | BGIOSGA019282 | XP_004968668.1ubiquitin-40S ribosomal protein S27a-1                                                            |
| TCONS_00003470 | -0.203129 | -0.0316871 | 0.316668    | BGIOSGA003405 | XP_014753998.1uncharacterized protein LOC100833370                                                              |
| TCONS_00011436 | -0.203024 | -0.233303  | -0.558523   | BGIOSGA011588 | XP_015695850.1 putative methyltransferase DDB_G0268948                                                          |
| TCONS_00001242 | -0.203013 | -3.49164   | -1.7641     | BGIOSGA004334 | XP_024318204.1uncharacterized protein LOC100834118                                                              |
| TCONS_00030874 | -0.202821 | -0.1474    | -1.0209     | BGIOSGA032678 |                                                                                                                 |
| TCONS_00003553 | -0.202652 | 0.882664   | 0.228448    | #N/A          | #N/A                                                                                                            |
| TCONS_00028300 | -0.202543 | 1.68135    | 1.06622     | BGIOSGA013123 | XP_006659616.1 calcium-transporting ATPase 8, plasma membrane-type-like isoform X2                              |
| TCONS_00026346 | -0.202461 | 0.659598   | 0.824272    | BGIOSGA007680 | XP_006659287.1 probable sucrose-phosphate synthase 4                                                            |
| TCONS_00030052 | -0.202326 | -0.982587  | -0.892288   | BGIOSGA006096 | XP_014758812.1CBL-interacting protein kinase 16                                                                 |
| TCONS_00010016 | -0.202319 | 0.690177   | -0.611177   | BGIOSGA021216 | XP_006650046.1 phospholipid-transporting ATPase 1-like                                                          |
| TCONS_00002961 | -0.202278 | 0.373745   | 0.308603    | BGIOSGA018693 | XP_015688186.1 MAR-binding filament-like protein 1                                                              |
| TCONS_00018237 | -0.202271 | 0.327488   | 0.242826    | BGIOSGA013619 | XP_006654397.1 RAN GTPase-activating protein 2-like                                                             |
| TCONS_00024842 | -0.202195 | 1.26189    | 0.803396    | BGIOSGA024527 | XP_006658440.1 pentatricopeptide repeat-containing protein At3g06920                                            |
| TCONS_00009317 | -0.202042 | -1.56469   | -1.45015    | BGIOSGA011860 | XP_006649399.1PREDICTED: uncharacterized protein SYNPCCT002_A1590                                               |
| TCONS_00021898 | -0.201923 | -0.0424619 | -0.556041   | BGIOSGA021631 | XP_021304238.1transcription termination factor MTERF15, mitochondrial isoform X1                                |
| TCONS_00010555 | -0.201751 | -0.957563  | -0.337583   | BGIOSGA008210 | XP_006650318.1 calcineurin B-like protein 3                                                                     |
| TCONS_00013171 | -0.201734 | -0.867967  | -0.196382   | BGIOSGA009813 | XP_015690066.1 photosystem II D1 precursor processing protein PSB27-H2, chloroplastic                           |
| TCONS_00031002 | -0.201672 | -1.18806   | 0.343717    | BGIOSGA012780 | NP_001149884.1catalytic/ hydrolase                                                                              |
| TCONS_00021568 | -0.201643 | -1.71743   | -1.60006    | BGIOSGA011877 | XP_006656612.1 armadillo repeat-containing kinesin-like protein 2                                               |
| TCONS_00013134 | -0.201569 | -0.149253  | -0.0633534  | BGIOSGA020076 | XP_015690933.1 probable NOT transcription complex subunit VIP2 isoform X2                                       |
| TCONS_00003317 | -0.201516 | 0.216288   | 0.581914    | BGIOSGA001897 | XP_006645765.2 glucosidase 2 subunit beta                                                                       |
| TCONS_00036976 | -0.201503 | -0.94314   | -2.58628    | BGIOSGA020439 | XP_015698395.1 probable solanesyl-diphosphate synthase 3, chloroplastic                                         |
| TCONS_00008254 | -0.201357 | -0.885295  | -0.295951   | BGIOSGA014926 | XP_006647427.1 dentin sialophosphoprotein-like                                                                  |
| TCONS_00015164 | -0.201347 | 0.896692   | 0.442532    | BGIOSGA017346 | XP_006653876.1 dihydroorotate dehydrogenase (quinone), mitochondrial                                            |
| TCONS_00021231 | -0.201344 | -0.493754  | 0.0390853   | BGIOSGA037776 | XP_015693718.1 NAC domain-containing protein 21/22-like                                                         |
| TCONS_00036999 | -0.201333 | -0.373919  | 0.189705    | BGIOSGA007498 | XP_006663935.1 zinc finger CCHH domain-containing protein 65 isoform X1                                         |
| TCONS_00029731 | -0.201186 | 0.224618   | 0.310612    | BGIOSGA028977 | XP_006660486.1 protein EMSY-LIKE 3-like                                                                         |
| TCONS_00013378 | -0.201126 | -1.07261   | -1.20088    | BGIOSGA009606 | XP_006651932.1 probable acyl-activating enzyme 18, peroxisomal                                                  |
| TCONS_00016029 | -0.201087 | 0.657982   | -0.147929   | BGIOSGA009914 | XP_006653489.1 anthranilate synthase beta subunit 1, chloroplastic                                              |
| TCONS_00011766 | -0.200874 | 0.336994   | -0.0574418  | BGIOSGA014312 | XP_006649602.1 metal transporter Nramp2                                                                         |
| TCONS_00021351 | -0.200757 | 0.339176   | 0.63004     | BGIOSGA035109 | XP_004966382.1mitogen-activated protein kinase 12                                                               |
| TCONS_00027168 | -0.200744 | -0.306306  | -0.241624   | BGIOSGA033093 | XP_015695925.1 ribokinase                                                                                       |
| TCONS_00001668 | -0.200685 | -0.33635   | -0.601904   | BGIOSGA014717 | XP_006644591.1 casein kinase I isoform delta-like isoform X1                                                    |
| TCONS_00003770 | -0.200654 | -0.673367  | -0.383233   | BGIOSGA019520 | XP_006645993.1 ribonuclease 3-like protein 2                                                                    |
| TCONS_00007028 | -0.20055  | 0.190872   | -0.238602   | BGIOSGA009210 | XP_006648056.1 transcriptional regulatory protein AlgP-like                                                     |
| TCONS_00007936 | -0.200257 | -1.2472    | -0.392459   | BGIOSGA023116 | XP_015692636.1PREDICTED: uncharacterized protein LOC107304196                                                   |
| TCONS_00037551 | -0.200101 | 0.779853   | 0.00095938  | BGIOSGA035814 | XP_006664215.1 methyl-CpG-binding domain-containing protein 11-like isoform X1                                  |
| TCONS_00017039 | -0.199803 | -1.10429   | -0.920094   | BGIOSGA017711 | XP_006653992.1 protein IQ-DOMAIN 1                                                                              |
| TCONS_00003983 | -0.199562 | -0.638019  | -1.15603    | BGIOSGA008609 | XP_006644368.1 3'-N-debenzoyl-2'-deoxytaxol N-benzoyltransferase-like                                           |
| TCONS_00016807 | -0.199432 | 0.0510836  | -0.255222   | BGIOSGA017305 | XP_022680720.1peptidyl-prolyl cis-trans isomerase NIMA-interacting 1                                            |
| TCONS_00033418 | -0.199354 | 0.134705   | -1.37051    | BGIOSGA018007 | XP_006662926.1 serine hydroxymethyltransferase 4                                                                |
| TCONS_00028478 | -0.199325 | -0.181794  | -0.293153   | BGIOSGA040675 | XP_006659708.1 puromycin-sensitive aminopeptidase isoform X1                                                    |
| TCONS_00019947 | -0.199323 | -0.775541  | 0.142522    | BGIOSGA022131 | XP_006656540.1 glycine--tRNA ligase, chloroplastic/mitochondrial 2                                              |
| TCONS_00021467 | -0.199319 | -2.14115   | -4.90546    | BGIOSGA022084 | XP_015694337.1 haloacid dehalogenase-like hydrolase domain-containing protein Sgpp                              |
| TCONS_00007203 | -0.199268 | 0.431821   | 0.0719651   | BGIOSGA019732 | XP_006646768.1 40S ribosomal protein S4                                                                         |
| TCONS_00036358 | -0.199115 | -0.531414  | 0.237574    | BGIOSGA013632 | XP_015698784.1 protein DA1-related 1-like                                                                       |
| TCONS_00017855 | -0.199081 | -0.712004  | 0.674379    | BGIOSGA000405 | XP_006654439.1 deoxycytidine kinase-like                                                                        |
| TCONS_00004395 | -0.198984 | -1.92702   | -0.3471     | BGIOSGA018089 | XP_015688107.1 probable WRKY transcription factor 65                                                            |
| TCONS_00000004 | -0.198974 | -0.480615  | -0.059669   | BGIOSGA007677 | XP_006643623.1 R3H domain-containing protein 1-like                                                             |
| TCONS_00025646 | -0.198973 | -2.76023   | -2.5894     | BGIOSGA023780 | XP_006658064.1 haloacid dehalogenase-like hydrolase domain-containing protein 3                                 |

## transcriptome

|                |           |            |              |               |                                                                                             |
|----------------|-----------|------------|--------------|---------------|---------------------------------------------------------------------------------------------|
| TCONS_00035637 | -0.198763 | -0.597922  | 0.20284      | BGIOSGA037057 | XP_015698228.1 5-formyltetrahydrofolate cyclo-ligase-like protein COG0212                   |
| TCONS_00004978 | -0.198661 | 0.298956   | -2.23083     | BGIOSGA034240 | XP_015688130.1 probable sucrose-phosphate synthase 1                                        |
| TCONS_00007988 | -0.198654 | 0.083624   | 0.48854      | BGIOSGA006493 | XP_006648632.1 riboflavin biosynthesis protein PYRR, chloroplastic isoform X1               |
| TCONS_00016471 | -0.198535 | 0.0497247  | -0.5268      | BGIOSGA005836 | XP_006652691.1 mitochondrial import inner membrane translocase subunit Tim13-like           |
| TCONS_00008841 | -0.198485 | -0.796915  | -0.190401    | BGIOSGA005575 | XP_006647944.1 armadillo repeat-containing protein 6 isoform X2                             |
| TCONS_00017060 | -0.198471 | -0.0189175 | 0.520319     | BGIOSGA030955 | XP_006654002.2 glutamate--cysteine ligase B, chloroplastic                                  |
| TCONS_00033859 | -0.198237 | -1.58808   | -0.667106    | BGIOSGA027080 | XP_015697811.1 protein ELF4-LIKE 4-like                                                     |
| TCONS_00011136 | -0.198015 | -1.40804   | 0.208979     | BGIOSGA025284 | XP_006651911.1 protein WVD2-like 1                                                          |
| TCONS_00008682 | -0.197983 | 0.0566029  | 0.110921     | BGIOSGA005748 | XP_022679424.1 galactan beta-1,4-galactosyltransferase GALS1-like                           |
| TCONS_00033362 | -0.197887 | 0.484606   | -0.105543    | BGIOSGA016174 | XP_006650241.2 ervatamin-C-like                                                             |
| TCONS_00008091 | -0.197835 | 0.112438   | 0.0984261    | BGIOSGA006361 | XP_015689538.1 protein BONZAI 1-like                                                        |
| TCONS_00023965 | -0.197829 | -0.498179  | -0.144715    | BGIOSGA009901 | XP_004958115.1 vacuolar protein sorting-associated protein 62                               |
| TCONS_00026865 | -0.197712 | 0.562391   | -0.105982    | BGIOSGA023434 | XP_002445949.1 nuclear transcription factor Y subunit C-6                                   |
| TCONS_00013223 | -0.197694 | 0.558617   | -0.551109    | BGIOSGA029649 | XP_015690086.1 vegetative cell wall protein gp1-like                                        |
| TCONS_00002633 | -0.197668 | -0.596875  | 0.212659     | BGIOSGA004058 | XP_006646740.2 AP3-complex subunit beta-A                                                   |
| TCONS_00022884 | -0.197553 | -0.273459  | 0.870572     | BGIOSGA020818 | XP_006656474.1 probable isoprenylcysteine alpha-carbonyl methyltransferase ICME1 isoform X1 |
| TCONS_00012800 | -0.197295 | -1.20117   | -1.29287     | BGIOSGA027705 | XP_006650337.1 BTB/POZ domain-containing protein At1g30440                                  |
| TCONS_00026937 | -0.197218 | -1.51623   | -1.10723     | BGIOSGA028988 | XP_004973897.1 serine/threonine-protein phosphatase 7                                       |
| TCONS_00005801 | -0.19702  | 0.122961   | 1.42266      | BGIOSGA021163 | XP_004951268.1 BTB/POZ domain-containing protein POB1 isoform X1                            |
| TCONS_00025132 | -0.196422 | 0.620161   | 0.238645     | BGIOSGA012025 | XP_010238113.1 ras-related protein RABH1b                                                   |
| TCONS_00006499 | -0.196324 | 0.0247585  | 0.410922     | BGIOSGA016779 | XP_006647553.1 PREDICTED: uncharacterized protein At2g24330-like                            |
| TCONS_00008160 | -0.196206 | -0.217104  | -1.02987     | BGIOSGA036558 | XP_006647358.1 V-type proton ATPase 16 kDa proteolipid subunit-like                         |
| TCONS_00006672 | -0.196152 | -0.850181  | -0.267234    | BGIOSGA017015 | XP_024318338.1 uncharacterized protein LOC100830018                                         |
| TCONS_00001370 | -0.196141 | -1.45012   | 0.693434     | BGIOSGA004000 | XP_006646105.1 psbP domain-containing protein 5, chloroplastic                              |
| TCONS_00005632 | -0.19609  | -0.387545  | -0.28741     | BGIOSGA020913 | XP_006647039.2 SEC14-like protein 1                                                         |
| TCONS_00006726 | -0.196082 | 0.160193   | -0.500712    | BGIOSGA008896 | XP_006647775.1 RING-box protein 1                                                           |
| TCONS_00007255 | -0.196038 | 0.504967   | 0.276196     | BGIOSGA030523 | XP_006648247.1 bifunctional protein FOLD 4, chloroplastic                                   |
| TCONS_00012031 | -0.196014 | 0.25316    | 0.102353     | BGIOSGA019077 | XP_002465447.1 calcium-transporting ATPase 4, endoplasmic reticulum-type                    |
| TCONS_00022090 | -0.195758 | -0.887578  | -0.586018    | BGIOSGA008736 | XP_003563941.1 protein kinase G11A                                                          |
| TCONS_00005835 | -0.195714 | -0.625148  | -0.658545    | BGIOSGA007961 | XP_006647158.1 NADPH:adrenodoxin oxidoreductase, mitochondrial                              |
| TCONS_00016079 | -0.195655 | 0.382748   | 0.280533     | BGIOSGA006144 | XP_006652403.1 60S ribosomal protein L6-3-like                                              |
| TCONS_00009287 | -0.195113 | 0.0756195  | -1.29507     | BGIOSGA014738 | XP_006649383.1 PREDICTED: uncharacterized protein LOC102721906                              |
| TCONS_00000283 | -0.19493  | -0.731644  | -0.109018    | BGIOSGA002860 | XP_015688240.1 angiogenic factor with G patch and FHA domains 1 isoform X1                  |
| TCONS_00026628 | -0.194927 | -0.156229  | 0.570253     | BGIOSGA014941 | XP_015695605.1 betaine aldehyde dehydrogenase 2                                             |
| TCONS_00024862 | -0.194385 | -1.00715   | 0.970958     | BGIOSGA032270 | XP_015689772.1 3-ketoacyl-CoA synthase 20-like                                              |
| TCONS_00036348 | -0.194277 | 0.108821   | -1.03214     | BGIOSGA025602 | XP_015698717.1 PREDICTED: uncharacterized protein LOC102712766                              |
| TCONS_00024425 | -0.194175 | -0.908351  | -0.096847    | BGIOSGA024984 | XP_015694991.1 probable tetraacyldisaccharide 4'-kinase, mitochondrial                      |
| TCONS_00003997 | -0.194158 | 0.350308   | -0.423195    | BGIOSGA015423 | XP_002458167.2 ATP-dependent zinc metalloprotease FTSH 9, chloroplastic/mitochondrial       |
| TCONS_00012266 | -0.194149 | 0.252486   | -0.0560346   | BGIOSGA000164 | XP_015690949.1 lipase-like isoform X1                                                       |
| TCONS_00020210 | -0.193874 | -0.0644593 | -0.738495    | BGIOSGA005164 | XP_014660472.1 probable calcium-binding protein CML30                                       |
| TCONS_00010605 | -0.19383  | -0.263945  | -0.449271    | BGIOSGA015356 | XP_015689997.1 myosin-binding protein 7-like                                                |
| TCONS_00036605 | -0.193708 | 1.44897    | -0.000551291 | BGIOSGA001074 | XP_004977445.1 NDR1/HIN1-like protein 13                                                    |
| TCONS_00025079 | -0.19367  | -0.405232  | -1.37916     | BGIOSGA033384 | XP_006657686.1 expansin-like A3 isoform X2                                                  |
| TCONS_00025326 | -0.193596 | -1.30904   | -0.907708    | BGIOSGA024103 | XP_012698871.1 equilibrative nucleotide transporter 3 isoform X2                            |
| TCONS_00004057 | -0.193416 | -0.905729  | -1.46419     | #N/A          | #N/A                                                                                        |
| TCONS_00017645 | -0.193411 | 0.666748   | -0.0519672   | BGIOSGA019707 | XP_006655234.1 PREDICTED: uncharacterized protein LOC102711535                              |
| TCONS_00003923 | -0.193226 | -1.19961   | 0.415005     | BGIOSGA005566 | XP_006649069.1 cytoplasmic tRNA 2-thiolation protein 1                                      |
| TCONS_00020882 | -0.193224 | -1.76757   | 1.3501       | BGIOSGA023090 | XP_010227607.1 uncharacterized protein LOC100843946                                         |
| TCONS_00011546 | -0.193121 | -0.757602  | -0.114459    | BGIOSGA011477 | NP_001140304.1 uncharacterized LOC100272349                                                 |
| TCONS_00018616 | -0.19298  | -0.270789  | -0.214583    | BGIOSGA036072 | XP_015693327.1 VIN3-like protein 1                                                          |
| TCONS_00024388 | -0.192923 | 0.215312   | -0.0025084   | BGIOSGA011155 | XP_015695040.1 transcription factor MYB108-like                                             |
| TCONS_00008115 | -0.192809 | -0.412379  | 1.20768      | BGIOSGA006335 | XP_015688619.1 poly [ADP-ribose] polymerase 3                                               |
| TCONS_00019557 | -0.192679 | -1.55657   | -1.14868     | BGIOSGA020526 | XP_020394449.1 putative bZIP transcription factor superfamily protein isoform X1            |
| TCONS_00036161 | -0.192652 | 0.0451059  | 0.556977     | BGIOSGA037517 | XP_015698701.1 protein RTF1 homolog                                                         |

## transcriptome

|                |           |             |            |               |                                                                                                               |
|----------------|-----------|-------------|------------|---------------|---------------------------------------------------------------------------------------------------------------|
| TCONS_00020145 | -0.192418 | 0.139897    | -0.964107  | BGIOSGA036462 | XP_015694431.1PREDICTED: uncharacterized protein ycf45                                                        |
| TCONS_00004720 | -0.192298 | -0.00712677 | 0.122277   | BGIOSGA000496 | XP_015688218.1 transcription initiation factor TFIIID subunit 12b isoform X2                                  |
| TCONS_00000378 | -0.192132 | 0.550598    | 0.504537   | BGIOSGA002953 | XP_002457170.2nuclear pore complex protein NUP35                                                              |
| TCONS_00009586 | -0.192084 | -0.407235   | -0.897681  | BGIOSGA032938 | XP_006649653.2 homocysteine S-methyltransferase 1                                                             |
| TCONS_00033437 | -0.19206  | 0.140223    | 0.201796   | BGIOSGA029039 | XP_010237731.1FHA domain-containing protein FHA2                                                              |
| TCONS_00022641 | -0.191864 | 0.0911764   | 0.1528     | BGIOSGA020804 | XP_006657182.1 ELKS/Rab6-interacting/CAST family member 1                                                     |
| TCONS_00007818 | -0.191709 | -0.0284817  | -0.295705  | BGIOSGA021301 | XP_003572668.1phosphatidylinositol 4-kinase gamma 4                                                           |
| TCONS_00002047 | -0.191688 | 0.525503    | 0.404275   | BGIOSGA004681 | XP_022682190.1 probable ADP-ribosylation factor GTPase-activating protein AGD14                               |
| TCONS_00022951 | -0.191252 | 0.325017    | 0.433587   | BGIOSGA020496 | XP_006656529.2PREDICTED: uncharacterized protein LOC102707973                                                 |
| TCONS_00013576 | -0.191076 | 0.0912039   | 0.471997   | BGIOSGA009400 | XP_006652048.1PREDICTED: uncharacterized protein LOC102715565                                                 |
| TCONS_00015812 | -0.191067 | #NA         | -3.70756   | BGIOSGA015170 | XP_004975474.1protein PYRICULARIA ORYZAE RESISTANCE 21                                                        |
| TCONS_00021276 | -0.190802 | -0.0365807  | -0.537118  | BGIOSGA001794 | XP_006656404.2 probable glucuronosyltransferase Os06g0687900                                                  |
| TCONS_00000003 | -0.19076  | 0.381424    | 0.267349   | BGIOSGA016906 | XP_004967891.1uncharacterized protein LOC101753816                                                            |
| TCONS_00011088 | -0.190695 | -0.422756   | 0.134966   | BGIOSGA001345 | XP_006650698.1 cullin-4                                                                                       |
| TCONS_00005170 | -0.190652 | -0.302123   | -0.123625  | BGIOSGA000035 | XP_015688132.1 UDP-D-apiose/UDP-D-xylose synthase                                                             |
| TCONS_00009356 | -0.190624 | -0.202623   | -0.46073   | BGIOSGA011905 | XP_006649432.1 pentatricopeptide repeat-containing protein At2g30780-like                                     |
| TCONS_00008100 | -0.190555 | 0.212759    | 0.727673   | BGIOSGA004544 | NP_001146865.1SAM domain family protein XP_006654063.1 mediator of RNA polymerase II transcription subunit 28 |
| TCONS_00018653 | -0.190329 | 0.0838532   | -0.553781  | BGIOSGA018782 | XP_015694700.1 glucan endo-1,3-beta-glucosidase 4-like                                                        |
| TCONS_00023970 | -0.190302 | -0.448716   | 0.048127   | BGIOSGA007921 | XP_015694434.1 deSI-like protein At4g17486 isoform X2                                                         |
| TCONS_00022427 | -0.190293 | -0.631844   | 0.525134   | BGIOSGA012052 | XP_006644589.1 glycopeptide N-tetradecanoyltransferase 1                                                      |
| TCONS_00001666 | -0.190263 | 1.627       | 1.16492    | BGIOSGA004301 | XP_006654097.1 probable cellulose synthase A catalytic subunit 1 [UDP-forming]                                |
| TCONS_00018712 | -0.190105 | -2.42843    | -2.29266   | BGIOSGA033504 | XP_015692007.1 zinc finger CCCH domain-containing protein 19-like isoform X2                                  |
| TCONS_00029385 | -0.190093 | 0.480074    | -0.0619131 | BGIOSGA033267 | XP_006657138.1 zinc finger CCCH domain-containing protein 44                                                  |
| TCONS_00022567 | -0.190047 | 0.557257    | 0.859894   | BGIOSGA017313 | XP_015690910.1 probable polygalacturonase                                                                     |
| TCONS_00009225 | -0.190026 | -3.11027    | 0.53779    | BGIOSGA013966 | XP_015696563.1 RHOMBOID-like protein 10, chloroplastic                                                        |
| TCONS_00029142 | -0.189984 | 0.0072444   | -0.61575   | BGIOSGA030893 | XP_006646913.1 40S ribosomal protein S14                                                                      |
| TCONS_00007395 | -0.189926 | 0.0657021   | -0.0113901 | BGIOSGA007344 | XP_008811147.1 heat shock protein 81-1-like                                                                   |
| TCONS_00029397 | -0.18972  | -0.788723   | -0.251464  | BGIOSGA029569 | XP_003574772.1putative L-ascorbate peroxidase 6 isoform X1                                                    |
| TCONS_00028327 | -0.189392 | -0.579289   | 0.915353   | BGIOSGA026652 | XP_006662879.1 phosphoinositide phosphatase SAC7-like                                                         |
| TCONS_00034730 | -0.189325 | -0.356259   | -0.624407  | BGIOSGA010944 | XP_015694628.1 probable plastid-lipid-associated protein 12, chloroplastic                                    |
| TCONS_00023644 | -0.189312 | -1.99398    | -0.935468  | BGIOSGA025666 | XP_015688156.1PREDICTED: uncharacterized protein LOC102705495                                                 |
| TCONS_00004809 | -0.189209 | 0.143981    | 0.393753   | BGIOSGA006274 | XP_015689426.1 splicing factor 3B subunit 3-like                                                              |
| TCONS_00005375 | -0.189169 | 0.807728    | 0.0938002  | BGIOSGA007486 | XP_006665128.1PREDICTED: uncharacterized protein LOC102716375                                                 |
| TCONS_00022958 | -0.188939 | -0.435285   | -0.378821  | BGIOSGA024993 | XP_006663950.1 50S ribosomal protein HLP, mitochondrial-like                                                  |
| TCONS_00037013 | -0.188563 | 0.344906    | -0.821311  | BGIOSGA035829 | XP_012704366.1uncharacterized protein LOC101779182, partial                                                   |
| TCONS_00010637 | -0.188556 | -0.173512   | -0.491374  | BGIOSGA010106 | NP_001151096.1integral membrane protein DUF6 containing protein                                               |
| TCONS_00010795 | -0.188467 | -0.567243   | -1.00394   | BGIOSGA032579 | XP_003581121.1ubiquitin-fold modifier-conjugating enzyme 1                                                    |
| TCONS_00030860 | -0.188322 | -0.0492919  | -0.280619  | BGIOSGA032665 | XP_004969576.1EEF1A lysine methyltransferase 2                                                                |
| TCONS_00001592 | -0.188294 | 0.346992    | 0.373051   | BGIOSGA010684 | XP_003570699.2RRP12-like protein                                                                              |
| TCONS_00006970 | -0.18829  | 0.895596    | 0.737459   | BGIOSGA009153 | XP_015692334.1 trihelix transcription factor GTL1-like isoform X2                                             |
| TCONS_00016334 | -0.188283 | -0.468597   | 0.570964   | BGIOSGA027744 | XP_006664965.1PREDICTED: uncharacterized protein LOC102715817 isoform X1                                      |
| TCONS_00019032 | -0.188157 | 0.371215    | 0.0610923  | BGIOSGA029400 | XP_003570124.1BOI-related E3 ubiquitin-protein ligase 1                                                       |
| TCONS_00008609 | -0.188147 | -0.660866   | -1.47853   | BGIOSGA022026 | XP_015696792.1 pentatricopeptide repeat-containing protein At1g76280 isoform X1                               |
| TCONS_00030213 | -0.188012 | -0.305439   | -0.656214  | BGIOSGA029596 | XP_015694557.1 zeta-carotene desaturase, chloroplastic/chromoplastic                                          |
| TCONS_00023324 | -0.188007 | 0.00672255  | -0.358135  | BGIOSGA025365 | XP_006652336.2 D-galacturonate reductase-like                                                                 |
| TCONS_00014331 | -0.187874 | 0.135789    | 0.686067   | BGIOSGA015612 | XP_006650641.1 upstream activation factor subunit spp27-like                                                  |
| TCONS_00011015 | -0.187851 | -0.269879   | 0.580076   | BGIOSGA016402 | XP_006644750.1PREDICTED: uncharacterized protein C9orf85 homolog                                              |
| TCONS_00004450 | -0.187747 | 0.0326748   | -0.0534779 | BGIOSGA000772 | NP_001151761.2acetolactate synthase 1, chloroplastic                                                          |
| TCONS_00006131 | -0.187576 | 0.272083    | 0.578083   | BGIOSGA016278 | XP_003578848.1O-fucosyltransferase 9 isoform X2                                                               |
| TCONS_00035656 | -0.187526 | 0.126608    | -0.0199428 | BGIOSGA019988 | XP_002265489.2 universal stress protein PHOS34                                                                |
| TCONS_00037336 | -0.187491 | -0.274798   | 0.0514915  | BGIOSGA036032 |                                                                                                               |

## transcriptome

|                |           |            |             |               |                                                                                     |
|----------------|-----------|------------|-------------|---------------|-------------------------------------------------------------------------------------|
| TCONS_00026527 | -0.187408 | 2.19159    | 1.02376     | BGIOSGA040488 | XP_015696060.1 serine/arginine-rich splicing factor SR45a-like isoform X2           |
| TCONS_00030025 | -0.187406 | 0.448041   | 0.919432    | BGIOSGA033437 | XP_006660614.1 U4/U6.U5 tri-snRNP-associated protein 2-like                         |
| TCONS_00025111 | -0.187404 | -0.248721  | 0.594819    | BGIOSGA008866 | XP_006658566.1 calmodulin-binding transcription activator 6-like                    |
| TCONS_00007666 | -0.187141 | 0.556958   | -0.48249    | BGIOSGA009469 | XP_006647108.1 shaggy-related protein kinase eta                                    |
| TCONS_00015020 | -0.18688  | -0.0720513 | 0.874869    | BGIOSGA012521 | XP_008661703.1 uncharacterized protein LOC100275650 isoform X6                      |
| TCONS_00018155 | -0.186633 | 0.261865   | 0.72856     | BGIOSGA000845 | XP_015693357.1 protein cereblon-like                                                |
| TCONS_00023436 | -0.186525 | -1.3224    | -1.67528    | BGIOSGA002599 | XP_003557327.1 probable cellulose synthase A catalytic subunit 6 [UDP-forming]      |
| TCONS_00013997 | -0.186242 | -0.807309  | -1.79979    | BGIOSGA040253 | XP_006652179.1 probable aldo-keto reductase 2                                       |
| TCONS_00009398 | -0.186217 | -0.502778  | 0.222586    | BGIOSGA011948 | XP_006649470.1 3-dehydroquinate synthase homolog isoform X2                         |
| TCONS_00025020 | -0.186112 | -0.166717  | 0.381575    | BGIOSGA035060 | XP_015695224.1 non-lysosomal glucosylceramidase-like isoform X2                     |
| TCONS_00037264 | -0.186002 | 1.1112     | -0.00344921 | BGIOSGA036114 | XP_003576025.1F-box protein At3g12350                                               |
| TCONS_00016801 | -0.185973 | 0.236927   | -1.5413     | BGIOSGA014165 | XP_015691606.1 GTP cyclohydrolase 1                                                 |
| TCONS_00004973 | -0.185707 | -1.75177   | -1.12166    | BGIOSGA000245 | XP_015690767.1 protein XRI1-like isoform X4                                         |
| TCONS_00007241 | -0.185535 | -0.324712  | -0.534129   | BGIOSGA006640 | XP_006646786.1 DNA-directed RNA polymerase II subunit 4                             |
| TCONS_00012165 | -0.185518 | -1.90922   | -0.388923   | BGIOSGA034729 | XP_015690842.1 alpha-L-arabinofuranosidase 1-like isoform X1                        |
| TCONS_00027517 | -0.18547  | -1.28179   | -0.00477158 | BGIOSGA027506 | XP_022683089.1putative F-box/LRR-repeat protein 22                                  |
| TCONS_00020610 | -0.185391 | 0.342666   | 0.281273    | BGIOSGA022795 | XP_006656013.1 E3 ubiquitin-protein ligase makorin                                  |
| TCONS_00022874 | -0.185303 | -0.503819  | -0.319101   | BGIOSGA007712 | XP_021305681.1pentatricopeptide repeat-containing protein At1g74600, chloroplastic  |
| TCONS_00006737 | -0.185299 | 0.888041   | 0.0016151   | BGIOSGA008908 | XP_015689382.1 heat shock 70 kDa protein 17                                         |
| TCONS_00000063 | -0.185215 | 0.480614   | -0.28874    | BGIOSGA022966 | XP_006645438.1 protein decapping 5-like                                             |
| TCONS_00004455 | -0.185176 | 0.206751   | 0.14727     | BGIOSGA000771 | XP_006644751.1PREDICTED: uncharacterized protein LOC102705673                       |
| TCONS_00004998 | -0.185142 | 1.31503    | 0.545948    | BGIOSGA036278 | XP_006645258.2 disease resistance protein RPP13-like                                |
| TCONS_00022614 | -0.185049 | 0.907127   | 1.02179     | BGIOSGA035350 | XP_006657164.1 plant UBX domain-containing protein 4-like                           |
| TCONS_00017195 | -0.184985 | 0.0658462  | -0.0188087  | BGIOSGA019237 | XP_015693174.1 arginine-tRNA ligase, cytoplasmic-like isoform X1                    |
| TCONS_00009425 | -0.184984 | 0.462083   | 0.722235    | BGIOSGA011976 | XP_006649496.1 tubulin-tyrosine ligase-like protein 12                              |
| TCONS_00021784 | -0.184915 | 0.326986   | -0.0582828  | BGIOSGA009155 | XP_015694201.1 phosphoinositide phosphatase SAC3-like isoform X1                    |
| TCONS_00029088 | -0.184643 | -0.301104  | 0.21035     | BGIOSGA035158 | NP_001333458.1 uncharacterized LOC103632816                                         |
| TCONS_00034378 | -0.18452  | 0.306307   | -0.131175   | BGIOSGA018529 | XP_015697571.1PREDICTED: uncharacterized protein LOC102717843, partial              |
| TCONS_00010222 | -0.184476 | -0.202898  | -0.280485   | BGIOSGA012786 | XP_006651458.1 F-box protein At1g78280                                              |
| TCONS_00026962 | -0.184384 | 0.341457   | 0.651876    | BGIOSGA030263 | XP_006659607.2 RNA pseudouridine synthase 3, mitochondrial                          |
| TCONS_00018416 | -0.184071 | -0.154629  | 0.936444    | BGIOSGA001256 | XP_015693305.1 transmembrane protein 33 homolog                                     |
| TCONS_00034949 | -0.183856 | 0.632919   | -0.347551   | BGIOSGA037317 | XP_006661053.1 E3 ubiquitin-protein ligase UPL1-like                                |
| TCONS_00029525 | -0.183796 | -0.298396  | -0.00269946 | BGIOSGA031281 | XP_006660990.2 nuclear pore complex protein GP210 isoform X2                        |
| TCONS_00002680 | -0.183788 | -0.210599  | 0.0372283   | BGIOSGA002541 | XP_021310910.1 uncharacterized protein LOC8079087 isoform X1                        |
| TCONS_00028306 | -0.183788 | 0.0662409  | 0.905984    | BGIOSGA031025 | XP_006659613.1 30S ribosomal protein S16                                            |
| TCONS_00036223 | -0.183459 | 0.309972   | -1.5984     | BGIOSGA011066 | XP_021301302.1calmodulin-binding protein 60 D                                       |
| TCONS_00030289 | -0.183371 | 0.600764   | 0.537163    | BGIOSGA037382 | XP_015696399.1 NAC domain-containing protein 16-like                                |
| TCONS_00034061 | -0.183326 | 0.545113   | -0.621789   | BGIOSGA015551 | XP_006663115.1 probable LRR receptor-like serine/threonine-protein kinase At3g47570 |
| TCONS_00017265 | -0.183298 | 0.0450792  | 0.454491    | BGIOSGA019307 | XP_006654129.2 sister-chromatid cohesion protein 3                                  |
| TCONS_00005639 | -0.18328  | -0.0621577 | 0.174224    | BGIOSGA026511 | XP_003571494.1cyanidin 3-O-rutinoside 5-O-glucosyltransferase                       |
| TCONS_00024210 | -0.183173 | -0.660123  | -0.0902827  | BGIOSGA026249 | XP_006658891.1 cytochrome P450 78A4-like                                            |
| TCONS_00010946 | -0.183002 | -0.825468  | -0.184917   | BGIOSGA013548 | XP_015690063.1 autophagy-related protein 16                                         |
| TCONS_00007296 | -0.182994 | -2.54794   | 0.52966     | BGIOSGA024510 | XP_006646836.1 metal transporter NRAT1                                              |
| TCONS_00007362 | -0.182969 | 0.609432   | 0.601326    | BGIOSGA022189 | XP_006646896.1 DNA-directed RNA polymerase V subunit 1                              |
| TCONS_00034501 | -0.182924 | -0.314183  | -1.16271    | BGIOSGA034322 | XP_003577269.1probable LRR receptor-like serine/threonine-protein kinase At3g47570  |
| TCONS_00026950 | -0.182861 | -1.91936   | -0.42869    | BGIOSGA016462 | NP_001149948.1K1KD-containing protein                                               |
| TCONS_00007119 | -0.182847 | 0.264395   | -0.149495   | BGIOSGA000020 | XP_006649176.1 pumilio homolog 1-like                                               |
| TCONS_00005828 | -0.1825   | 0.337736   | 1.01133     | BGIOSGA037028 | XP_006647154.1PREDICTED: uncharacterized protein LOC102721614                       |
| TCONS_00023341 | -0.182412 | -0.102749  | 0.109592    | BGIOSGA025382 | XP_006658391.2 DNA-binding protein EMPB-1-like                                      |
| TCONS_00013798 | -0.18232  | 0.0617553  | 0.170796    | BGIOSGA022835 | XP_003566733.2glycosyltransferase-like At2g41451                                    |
| TCONS_00023408 | -0.182034 | 1.07412    | 0.162162    | BGIOSGA024545 | XP_004955928.1F-box/kelch-repeat protein At3g23880                                  |
| TCONS_00013368 | -0.181873 | 0.250816   | 0.262685    | BGIOSGA011932 | XP_015690115.1PREDICTED: uncharacterized protein LOC102701437, partial              |
| TCONS_00022889 | -0.181849 | -0.226117  | 0.925035    | BGIOSGA026306 | XP_003563543.1 uncharacterized protein LOC100829885                                 |
| TCONS_00006555 | -0.181798 | -0.625201  | -0.922153   | BGIOSGA008721 | XP_006648884.1 ATP-dependent zinc metalloprotease FTSH 7, chloroplastic             |

transcriptome

|                |           |             |            |               |                                                                          |
|----------------|-----------|-------------|------------|---------------|--------------------------------------------------------------------------|
| TCONS_00011862 | -0.181346 | -0.318876   | 0.429903   | BGIOSGA032555 | XP_006651206.1PREDICTED: uncharacterized protein LOC102716394            |
| TCONS_00005759 | -0.181105 | -0.172049   | 0.568875   | BGIOSGA002151 | XP_015688535.1 polyadenylate-binding protein-interacting protein 8-like  |
| TCONS_00020083 | -0.180963 | -0.0581791  | 0.762139   | BGIOSGA002885 | XP_006655769.1PREDICTED: uncharacterized protein LOC102721844 isoform X2 |
| TCONS_00020131 | -0.180789 | -0.43868    | 0.142324   | BGIOSGA022331 | XP_006655795.1 DNA repair protein RadA homolog                           |
| TCONS_00004862 | -0.180713 | -0.503343   | 0.560522   | BGIOSGA000358 | XP_006646549.1 serine/threonine-protein kinase rio2                      |
| TCONS_00014125 | -0.180458 | 0.161296    | -0.124699  | BGIOSGA038099 | XP_006652215.1 2-oxoglutarate dehydrogenase, mitochondrial-like          |
| TCONS_00017296 | -0.180333 | -1.24993    | #N/A       | BGIOSGA004895 | XP_002439433.2 lachrymatory-factor synthase                              |
| TCONS_00003972 | -0.180332 | -0.0744623  | -0.168059  | BGIOSGA001967 | XP_006644362.1PREDICTED: uncharacterized protein LOC102708475            |
| TCONS_00006408 | -0.180292 | 0.76193     | -0.278134  | BGIOSGA016643 | XP_015689305.1 cyclin-dependent kinase G-1                               |
| TCONS_00019566 | -0.180203 | -0.495999   | -0.0750079 | BGIOSGA035871 | XP_015693332.1 glyoxysomal processing protease, glyoxysomal              |
| TCONS_00011403 | -0.179738 | -0.107015   | -0.316645  | BGIOSGA036283 | XP_006663986.1PREDICTED: uncharacterized protein LOC102709889 isoform X1 |
| TCONS_00014352 | -0.179596 | -0.893409   | -1.12858   | BGIOSGA006529 | XP_010491788.1 histone H3.3                                              |
| TCONS_00011358 | -0.179544 | -0.384596   | -0.305581  | BGIOSGA031910 | XP_006652039.1 heat stress transcription factor A-1                      |
| TCONS_00005018 | -0.179533 | -3.57287    | -0.581098  | BGIOSGA000199 | XP_015699164.1 serine/threonine-protein kinase CDL1-like isoform X2      |
| TCONS_00018397 | -0.179517 | 0.201571    | 0.305718   | BGIOSGA020449 | XP_020394635.1 uncharacterized LOC100381615 isoform X1                   |
| TCONS_00019377 | -0.179098 | -0.113993   | 0.690832   | BGIOSGA026536 | NP_001131692.1 uncharacterized LOC100193052                              |
| TCONS_00004447 | -0.178951 | -0.804016   | -0.694975  | BGIOSGA000775 | XP_006644746.1PREDICTED: uncharacterized protein LOC102704013            |
| TCONS_00029024 | -0.178947 | -6.39026    | -0.993183  | BGIOSGA025923 | XP_006660635.1 cellulose synthase A catalytic subunit 9 [UDP-forming]    |
| TCONS_00002597 | -0.178834 | 0.125365    | -0.197461  | BGIOSGA014051 | XP_004971373.2PH, RCC1 and FYVE domains-containing protein 1 isoform X2  |
| TCONS_00031287 | -0.178751 | 0.108627    | -0.0320443 | BGIOSGA033101 | XP_006661848.1 peroxisome biogenesis protein 12 isoform X1               |
| TCONS_00022982 | -0.178731 | -0.197156   | 0.200018   | BGIOSGA002861 | XP_006657396.1 phytylsulfokine receptor 2                                |
| TCONS_00036748 | -0.178707 | -0.746801   | 0.519389   | BGIOSGA025477 | XP_004977302.1 exocyst complex component EXO70B1                         |
| TCONS_00025288 | -0.178007 | -0.0426866  | -0.291573  | BGIOSGA024138 | XP_015694676.1 peptide chain release factor PrfB1, chloroplastic-like    |
| TCONS_00007337 | -0.177781 | 0.530102    | 0.0344177  | BGIOSGA008208 | XP_006646877.2 splicing factor 3B subunit 1                              |
| TCONS_00002983 | -0.177729 | 0.0801952   | -0.134947  | BGIOSGA002235 | XP_015699272.1 serine/threonine-protein kinase 38                        |
| TCONS_00000350 | -0.177617 | -0.537312   | -0.169233  | BGIOSGA014832 | XP_022682500.1 clavamate synthase-like protein At3g21360                 |
| TCONS_00010250 | -0.177581 | -0.253415   | 0.15099    | BGIOSGA012812 | XP_004984095.1E3 ubiquitin-protein ligase EL5                            |
| TCONS_00009226 | -0.177525 | -0.0939102  | 1.23499    | BGIOSGA011756 | XP_015691154.1 PIN2/TERF1-interacting telomerase inhibitor 1 isoform X2  |
| TCONS_00036361 | -0.177427 | -0.36463    | 0.0868871  | BGIOSGA000725 | XP_006664165.1 MATH domain-containing protein At5g43560-like             |
| TCONS_00025797 | -0.1773   | 0.69305     | 0.8047     | BGIOSGA027861 | XP_006656946.1 50S ribosomal protein L30                                 |
| TCONS_00034471 | -0.177242 | 0.592447    | 0.26048    | BGIOSGA003061 | XP_006662807.1 TOM1-like protein 2                                       |
| TCONS_00009221 | -0.177238 | 1.00756     | -1.2347    | BGIOSGA012861 | XP_006649302.1 homeobox protein BEL1 homolog                             |
| TCONS_00002578 | -0.177065 | 0.58786     | 0.0641475  | BGIOSGA005221 | XP_004971334.1 probable gamma-secretase subunit PEN-2                    |
| TCONS_00001466 | -0.176924 | -0.32582    | 0.279093   | BGIOSGA004104 | XP_003569452.1 uncharacterized protein LOC100830426                      |
| TCONS_00018134 | -0.176878 | -0.265191   | -0.542363  | BGIOSGA031780 | XP_006654649.1 ras-related protein Rab7 isoform X2                       |
| TCONS_00023063 | -0.17677  | -0.867673   | -0.492007  | BGIOSGA033444 | XP_006661064.1 hexose carrier protein HEX6-like                          |
| TCONS_00014941 | -0.176755 | 2.89812     | 2.10517    | BGIOSGA017119 | XP_006653765.2 protein argonaute 2-like                                  |
| TCONS_00006256 | -0.176752 | 0.175656    | -0.17732   | BGIOSGA008417 | XP_006647368.2PREDICTED: uncharacterized protein LOC102714703            |
| TCONS_00016922 | -0.176744 | 0.00856177  | 0.63433    | BGIOSGA016419 | XP_006653070.1 cationic peroxidase SPC4-like                             |
| TCONS_00005918 | -0.176517 | -0.852992   | 0.402082   | BGIOSGA008053 | XP_010234565.1 uncharacterized protein LOC100822445                      |
| TCONS_00030225 | -0.176477 | -0.594874   | 0.330594   | BGIOSGA029582 | XP_002462536.1 uncharacterized protein LOC8063750                        |
| TCONS_00025873 | -0.176416 | 1.70859     | 0.148088   | BGIOSGA027945 | XP_006659801.1PREDICTED: uncharacterized protein LOC102706676 isoform X2 |
| TCONS_00000609 | -0.176409 | -0.0959215  | -0.286011  | BGIOSGA003193 | XP_015688046.1PREDICTED: uncharacterized protein LOC102699906 isoform X2 |
| TCONS_00012696 | -0.176102 | -1.00361    | -0.594809  | BGIOSGA013095 | XP_002461077.2 uncharacterized protein LOC8079369                        |
| TCONS_00015826 | -0.176072 | -1.25532    | -0.174697  | BGIOSGA035124 | XP_006652240.1 probable BOI-related E3 ubiquitin-protein ligase 3        |
| TCONS_00023184 | -0.175819 | -0.395875   | -2.38732   | BGIOSGA025224 | XP_003557525.1 protein MET1, chloroplastic                               |
| TCONS_00013105 | -0.175773 | -0.875287   | -0.138462  | BGIOSGA010318 | XP_015690048.1 GTP-binding protein At3g49725, chloroplastic              |
| TCONS_00031786 | -0.175773 | -0.0196773  | 0.276576   | #N/A          | #N/A                                                                     |
| TCONS_00033040 | -0.175425 | -0.118632   | 1.03315    | BGIOSGA034876 | XP_006647316.1PREDICTED: uncharacterized protein LOC102700210            |
| TCONS_00018338 | -0.175125 | -0.00275677 | -0.338327  | BGIOSGA020389 | XP_015693307.1 common plant regulatory factor 1-like                     |
| TCONS_00023244 | -0.175036 | -0.300074   | -0.360873  | BGIOSGA013735 | XP_006657512.1 protein VVD2-like 1                                       |
| TCONS_00021808 | -0.174683 | 0.0648576   | -1.27125   | BGIOSGA007401 | XP_006655893.1 choline/ethanolaminephosphotransferase 1-like             |
| TCONS_00017344 | -0.174669 | -1.62482    | -2.27129   | BGIOSGA002531 | XP_015698944.1PREDICTED: uncharacterized protein LOC102718237            |
| TCONS_00000711 | -0.174587 | 1.66881     | 1.77582    | BGIOSGA012235 | XP_006644089.1 protein ROOT PRIMORDIUM DEFECTIVE 1                       |

transcriptome

|                |           |            |            |               |                                                                                           |
|----------------|-----------|------------|------------|---------------|-------------------------------------------------------------------------------------------|
| TCONS_00012131 | -0.17456  | -0.534758  | 0.406517   | BGIOSGA010877 | XP_006649970.1PREDICTED: uncharacterized protein LOC102701065                             |
| TCONS_00014162 | -0.174534 | -0.0873326 | 0.0994736  | BGIOSGA032223 | XP_006652232.2 probable glucuronosyltransferase Os04g0398600                              |
| TCONS_00020267 | -0.174502 | -0.179453  | 0.170253   | BGIOSGA022457 | XP_006656727.1 pre-mRNA-splicing factor ATP-dependent RNA helicase DEAH10                 |
| TCONS_00012350 | -0.174161 | -1.31662   | 0.266821   | BGIOSGA026659 | XP_006650136.2 probable mannan synthase 5                                                 |
| TCONS_00007779 | -0.174146 | 0.688308   | -1.15989   | BGIOSGA006383 | XP_022680572.1galactoside 2-alpha-L-fucosyltransferase isoform X2                         |
| TCONS_00005129 | -0.174135 | 0.253969   | -0.579518  | BGIOSGA000075 | XP_015691084.1 phosphatidylserine decarboxylase proenzyme 2                               |
| TCONS_00004721 | -0.174122 | -1.11172   | 0.679284   | BGIOSGA030356 | XP_006645005.1 CASP-like protein 5B1                                                      |
| TCONS_00016767 | -0.174037 | 0.474937   | 0.244014   | #N/A          | #N/A                                                                                      |
| TCONS_00018791 | -0.174029 | -0.405133  | -0.850241  | BGIOSGA010300 | XP_023156864.1 uncharacterized protein LOC103638887                                       |
| TCONS_00014302 | -0.173862 | 0.174857   | 0.94911    | BGIOSGA004260 | XP_006653425.1 probable pectinesterase/pectinesterase inhibitor 51                        |
| TCONS_00008638 | -0.173803 | 0.679775   | -1.536     | BGIOSGA021182 | XP_006648963.1 ubiquinol oxidase 1a, mitochondrial-like                                   |
| TCONS_00008425 | -0.173751 | -1.25824   | -1.18045   | BGIOSGA004358 | XP_006644638.1 putative disease resistance protein RGA3 isoform X1                        |
| TCONS_00013550 | -0.173746 | -2.31072   | 0.550688   | BGIOSGA009425 | XP_010232041.1 uncharacterized protein At5g65660 isoform X2                               |
| TCONS_00030216 | -0.173578 | 0.576118   | -0.180874  | BGIOSGA010814 | XP_014757402.1O-fucosyltransferase 34                                                     |
| TCONS_00005274 | -0.173525 | -0.671406  | -0.477236  | BGIOSGA011520 | XP_006646781.1 catalase isozyme A-like                                                    |
| TCONS_00021716 | -0.173447 | -0.571393  | 1.4423     | BGIOSGA021805 | XP_004964716.1ran-binding protein 9                                                       |
| TCONS_00024602 | -0.173399 | 0.0969359  | -0.0747578 | BGIOSGA037907 | XP_006655722.1PREDICTED: uncharacterized protein LOC102708063 isoform X1                  |
| TCONS_00022870 | -0.173145 | -1.07846   | -0.321323  | BGIOSGA020574 | XP_015694256.1 delta-aminolevulinic acid dehydratase, chloroplastic                       |
| TCONS_00016634 | -0.172767 | 0.438784   | -0.756507  | BGIOSGA014328 | XP_015691991.1 ABC transporter C family member 2-like                                     |
| TCONS_00003225 | -0.172608 | -0.36503   | -1.07397   | BGIOSGA017549 | XP_015688306.1PREDICTED: uncharacterized protein LOC102713223                             |
| TCONS_00015081 | -0.172435 | 0.0661431  | -0.319752  | BGIOSGA007496 | XP_006652933.1 vacuolar cation/proton exchanger 3                                         |
| TCONS_00017903 | -0.172432 | -0.347771  | 0.183414   | BGIOSGA019947 | XP_006655366.2PREDICTED: uncharacterized protein LOC102707680                             |
| TCONS_00024329 | -0.172376 | -0.0552663 | -0.0690254 | BGIOSGA010755 | XP_015695239.1PREDICTED: uncharacterized protein LOC102705092                             |
| TCONS_00024282 | -0.172357 | 0.504667   | -0.451406  | BGIOSGA023908 | XP_006658072.1 elongation factor 1-beta                                                   |
| TCONS_00032932 | -0.172228 | 0.036361   | 0.238257   | BGIOSGA015044 | XP_006660823.1PREDICTED: uncharacterized protein LOC102703243                             |
| TCONS_00017734 | -0.171881 | -0.0911792 | -0.334569  | BGIOSGA019795 | XP_006654353.1 probable folate-biopterin transporter 7                                    |
| TCONS_00005480 | -0.171844 | -0.475647  | -1.24173   | BGIOSGA033648 | XP_006647006.1 disease resistance protein RPM1-like                                       |
| TCONS_00019104 | -0.171597 | -0.302764  | 1.75508    | BGIOSGA018256 | XP_006654275.2 phagocyte signaling-impaired protein                                       |
| TCONS_00005172 | -0.171512 | -0.935796  | 0.52797    | BGIOSGA000064 | XP_024314581.1 uncharacterized protein LOC100835523, partial                              |
| TCONS_00025096 | -0.171327 | -0.66549   | 0.0270892  | BGIOSGA024303 | XP_006658559.2 E3 ubiquitin protein ligase RIN2-like                                      |
| TCONS_00016412 | -0.171208 | -0.360962  | -0.498509  | BGIOSGA023366 | XP_003580318.2lysine-specific histone demethylase 1 homolog 3                             |
| TCONS_00006845 | -0.171037 | -1.25644   | -0.539955  | BGIOSGA028870 | XP_015689320.1 DEXH-box ATP-dependent RNA helicase DEXH15 chloroplastic isoform X1        |
| TCONS_00019618 | -0.170794 | 0.179592   | -0.0894483 | BGIOSGA033125 | XP_006654631.1 serine/threonine-protein kinase tricornet-like                             |
| TCONS_00021594 | -0.170757 | -0.0804144 | 1.00986    | BGIOSGA002264 | XP_006655777.1 probable 1-deoxy-D-xylulose-5-phosphate synthase, chloroplastic isoform X1 |
| TCONS_00027099 | -0.170715 | -1.22592   | 0.287947   | BGIOSGA034849 | XP_015696038.1PREDICTED: uncharacterized protein LOC102715781                             |
| TCONS_00029197 | -0.170632 | 0.0573979  | 0.30289    | BGIOSGA030942 | XP_004957070.1protein SCA1 homolog isoform X1                                             |
| TCONS_00031293 | -0.17054  | -2.56452   | -1.75698   | BGIOSGA024994 | XP_003571861.1protein NRT1/ PTR FAMILY 5.2                                                |
| TCONS_00016178 | -0.17048  | -0.915987  | -0.0419907 | BGIOSGA037451 | XP_006664049.1 ubiquitin-like-conjugating enzyme ATG10                                    |
| TCONS_00016843 | -0.170462 | -1.13041   | -0.438421  | BGIOSGA014123 | XP_006653005.1 probable polyamine oxidase 4                                               |
| TCONS_00017166 | -0.170454 | -1.49805   | -0.454794  | BGIOSGA004652 | XP_006654067.2 heparan-alpha-glucosaminide N-acetyltransferase-like                       |
| TCONS_00002046 | -0.170449 | 0.159493   | 0.475422   | BGIOSGA020256 | XP_010232480.1 probable ADP-ribosylation factor GTPase-activating protein AGD14           |
| TCONS_00008564 | -0.170352 | 0.0922205  | 0.518577   | BGIOSGA005860 | XP_006647671.1PREDICTED: uncharacterized protein LOC102708409                             |
| TCONS_00027543 | -0.170209 | -0.990238  | -0.405443  | BGIOSGA027468 | XP_015695749.1 equilibrative nucleotide transporter 1-like                                |
| TCONS_00010334 | -0.170151 | 1.14668    | 0.349039   | BGIOSGA012907 | XP_004983991.140S ribosomal protein S19                                                   |
| TCONS_00001682 | -0.169989 | -1.37447   | -0.851138  | BGIOSGA037727 | XP_006644608.1 protein REVERSION-TO-ETHYLENE SENSITIVITY1-like                            |
| TCONS_00010730 | -0.169955 | 0.684006   | 1.276      | BGIOSGA013353 | XP_003559565.1protein FLOURY ENDOSPERM 6, chloroplastic                                   |
| TCONS_00009665 | -0.169907 | -0.792332  | -0.28912   | BGIOSGA032465 | XP_006649714.1PREDICTED: uncharacterized protein LOC102722938 isoform X1                  |
| TCONS_00037127 | -0.169862 | 0.2474     | 0.57156    | BGIOSGA036245 | XP_006663982.1 proline--tRNA ligase, cytoplasmic                                          |
| TCONS_00023434 | -0.169779 | -0.211893  | -0.0986998 | BGIOSGA008199 | XP_006658445.1 protein CIA1-like                                                          |
| TCONS_00025726 | -0.169729 | 0.398212   | 0.122937   | BGIOSGA023695 | XP_015695181.1 nuclear pore complex protein NUP214                                        |
| TCONS_00019113 | -0.169581 | -2.70541   | -1.58365   | BGIOSGA018251 | XP_015692556.1 cytosolic endo-beta-N-acetylglucosaminidase 1-like                         |
| TCONS_00033791 | -0.169561 | 1.35728    | 0.427032   | BGIOSGA018806 | XP_003577389.1DEAD-box ATP-dependent RNA helicase 52C                                     |
| TCONS_00015160 | -0.169443 | 0.0842735  | 0.638581   | BGIOSGA021369 | XP_006653019.2 protein S-acyltransferase 11                                               |

transcriptome

|                |           |            |            |               |                                                                                                                                                     |
|----------------|-----------|------------|------------|---------------|-----------------------------------------------------------------------------------------------------------------------------------------------------|
| TCONS_00000064 | -0.169366 | -0.619774  | -0.0917683 | BGIOSGA007547 | XP_023157643.1 uncharacterized LOC100279343 isoform X4<br>XP_015689224.1 staphylococcal nuclease domain-containing protein 1-like                   |
| TCONS_00008093 | -0.169332 | 0.70392    | 0.740599   | BGIOSGA015162 | #N/A                                                                                                                                                |
| TCONS_00033087 | -0.169253 | 0.474824   | -1.30531   | #N/A          |                                                                                                                                                     |
| TCONS_00035668 | -0.169168 | -0.756226  | 0.485973   | BGIOSGA012507 | XP_004977226.1 aspartic proteinase Asp1                                                                                                             |
| TCONS_00012120 | -0.168816 | 0.0651971  | -1.23859   | BGIOSGA006341 | XP_015689868.1 probable glycosyltransferase 4<br>XP_006658218.1 flavin-containing monooxygenase FMO GS-OX-like 9                                    |
| TCONS_00000930 | -0.168788 | -2.76773   | 0.155623   | BGIOSGA025034 | XP_006654721.2 SWR1-complex protein 4                                                                                                               |
| TCONS_00018224 | -0.168703 | 0.249178   | 0.088229   | BGIOSGA020282 | XP_015696320.1 aminopeptidase M1-C                                                                                                                  |
| TCONS_00028847 | -0.168685 | 0.0334102  | -1.17081   | BGIOSGA007797 | XP_004966062.1 heterogeneous nuclear ribonucleoprotein A3 homolog 2<br>XP_015691677.1 probable periplasmic serine endoprotease DegP-like isoform X4 |
| TCONS_00012871 | -0.168062 | -0.173872  | 0.168754   | BGIOSGA013258 | XP_015698359.1 methylcrotonoyl-CoA carboxylase subunit alpha, mitochondrial                                                                         |
| TCONS_00036385 | -0.167751 | 0.337755   | 0.853763   | BGIOSGA032771 | XP_015688178.1 protein ATAF2 isoform X2                                                                                                             |
| TCONS_00002998 | -0.16765  | -1.73044   | -0.396163  | BGIOSGA034037 | XP_006645681.1 zinc phosphodiesterase ELAC protein 2 isoform X1                                                                                     |
| TCONS_00000502 | -0.167341 | -0.26699   | 0.603773   | BGIOSGA003075 | XP_006650489.2 probable serine/threonine protein kinase IREH1                                                                                       |
| TCONS_00013055 | -0.167298 | 0.955396   | 0.352606   | BGIOSGA037819 |                                                                                                                                                     |
| TCONS_00021219 | -0.167263 | 0.122303   | -0.156222  | BGIOSGA023441 | XP_006656363.1 molybdenum cofactor sulfurase<br>XP_006646359.1 probable xyloglucan glycosyltransferase 1                                            |
| TCONS_00004470 | -0.167043 | -0.261566  | 0.172045   | BGIOSGA005632 | XP_006664240.1 BEL1-like homeodomain protein 7                                                                                                      |
| TCONS_00037596 | -0.166808 | -0.640544  | -0.617206  | BGIOSGA013510 | XP_021302775.1 DIMBOA UDP-glucosyltransferase BX9-like                                                                                              |
| TCONS_00034797 | -0.166787 | -3.38361   | -0.746223  | BGIOSGA031094 | XP_012702006.1GTP-binding protein SAR1A                                                                                                             |
| TCONS_00000844 | -0.166654 | 0.304405   | -0.550798  | BGIOSGA033678 | XP_015691318.1 DEAD-box ATP-dependent RNA helicase 13                                                                                               |
| TCONS_00016235 | -0.166615 | 0.482624   | 0.29189    | BGIOSGA017179 | XP_006659539.1 phosphatidylinositol/phosphatidylcholine transfer protein SFH6                                                                       |
| TCONS_00026870 | -0.166571 | -2.24127   | 0.235543   | BGIOSGA030981 | XP_006654235.1 dolichyl-diphosphooligosaccharide--protein glycosyltransferase subunit 1A                                                            |
| TCONS_00017498 | -0.166464 | 0.45286    | 0.392494   | BGIOSGA019571 | XP_006654406.1 putative disease resistance protein RGA3                                                                                             |
| TCONS_00019297 | -0.1663   | 0.471111   | 0.0954723  | BGIOSGA032316 | XP_015690279.1 molybdate-anion transporter-like                                                                                                     |
| TCONS_00009180 | -0.16619  | 0.00522513 | 0.446393   | BGIOSGA014189 | XP_006652292.1 histone-lysine N-methyltransferase ASHH1                                                                                             |
| TCONS_00014268 | -0.165985 | -0.592151  | 0.868358   | BGIOSGA031245 | XP_006646834.1 anthranilate phosphoribosyltransferase                                                                                               |
| TCONS_00007293 | -0.165955 | -0.139831  | 0.0366416  | BGIOSGA007189 | XP_006649001.1 chloride channel protein CLC-f-like                                                                                                  |
| TCONS_00008709 | -0.165809 | 0.231709   | -0.156281  | BGIOSGA028930 | XP_006659748.1PREDICTED: uncharacterized protein LOC102714034                                                                                       |
| TCONS_00027230 | -0.165778 | 0.223904   | -0.487316  | BGIOSGA013505 | XP_015698010.1 alpha-L-arabinofuranosidase 1-like isoform X1                                                                                        |
| TCONS_00032904 | -0.165767 | -1.84698   | -1.48172   | BGIOSGA010845 | XP_004955583.1 casein kinase 1-like protein HD16 isoform X2                                                                                         |
| TCONS_00023185 | -0.165505 | -0.0243587 | -0.272474  | BGIOSGA018634 | XP_006658603.1 rab3 GTPase-activating protein catalytic subunit                                                                                     |
| TCONS_00023747 | -0.165397 | -1.17563   | -0.475292  | BGIOSGA013147 | XP_006662116.1PREDICTED: uncharacterized protein LOC102703901                                                                                       |
| TCONS_00032795 | -0.165147 | 0.379466   | -0.205866  | BGIOSGA022057 | XP_006654231.1 acetyl-CoA carboxylase 2                                                                                                             |
| TCONS_00018999 | -0.165087 | 0.228922   | -0.345256  | BGIOSGA032771 | NP_001151260.1 stress regulated protein                                                                                                             |
| TCONS_00000967 | -0.164838 | -1.80936   | -0.0807543 | BGIOSGA015881 | XP_020405928.1 uncharacterized protein LOC100303930                                                                                                 |
| TCONS_00002623 | -0.164733 | -0.716405  | -1.07886   | BGIOSGA005262 | XP_006662560.1 probable protein phosphatase 2C 47                                                                                                   |
| TCONS_00031566 | -0.164731 | -0.1753    | 0.276081   | BGIOSGA033380 | XP_006644236.1 putative disease resistance protein RGA3 isoform X2                                                                                  |
| TCONS_00015630 | -0.164503 | -1.54189   | -1.14255   | BGIOSGA001516 | XP_015694963.1 predicted GPI-anchored protein 58                                                                                                    |
| TCONS_00023676 | -0.16444  | 0.888814   | 0.331122   | BGIOSGA025701 | XP_015691254.1 pheophorbide a oxygenase, chloroplastic                                                                                              |
| TCONS_00009316 | -0.16442  | -0.210038  | -0.2759    | BGIOSGA011859 | XP_006654459.1 polypyrimidine tract-binding protein homolog 3-like isoform X1                                                                       |
| TCONS_00019365 | -0.164299 | -0.758713  | 0.207724   | BGIOSGA004873 | XP_006656169.1 T-complex protein 1 subunit epsilon-like                                                                                             |
| TCONS_00022431 | -0.16406  | 1.4498     | 0.549074   | BGIOSGA001561 | XP_003569976.1 vacuolar-processing enzyme beta-isozyme 1                                                                                            |
| TCONS_00008477 | -0.164026 | -0.65843   | 0.3595     | BGIOSGA003766 | XP_006643673.1 G-type lectin S-receptor-like serine/threonine-protein kinase SD2-5                                                                  |
| TCONS_00000077 | -0.16375  | 0.350255   | -0.144402  | BGIOSGA024205 | XP_006662873.1PREDICTED: uncharacterized protein LOC102718029                                                                                       |
| TCONS_00033405 | -0.163603 | -1.71656   | 0.239102   | BGIOSGA015855 | XP_002444756.1 transcription termination factor MTERF6, chloroplastic/mitochondrial                                                                 |
| TCONS_00028296 | -0.163421 | -0.374439  | -0.0964598 | BGIOSGA026683 | XP_006664872.1 pentatricopeptide repeat-containing protein At2g38420, mitochondrial-like                                                            |
| TCONS_00019030 | -0.163388 | -0.985606  | 0.215572   | BGIOSGA034637 | XP_024310200.1 uncharacterized protein LOC100838037 isoform X1                                                                                      |
| TCONS_00029125 | -0.162893 | 0.373333   | 0.324434   | BGIOSGA030875 | XP_006657458.1 putative phosphatidylglycerol/phosphatidylinositol transfer protein DDB_G0282179                                                     |
| TCONS_00023147 | -0.162747 | -0.269004  | -0.353863  | BGIOSGA013694 | XP_006660260.1 DNA-damage-repair/tolerant protein DRT100-like                                                                                       |
| TCONS_00028266 | -0.16269  | -0.891155  | -0.808979  | BGIOSGA019255 | XP_006652015.1 ALBINO3-like protein 1, chloroplastic                                                                                                |
| TCONS_00011319 | -0.162316 | 1.03809    | 1.04598    | BGIOSGA002795 | XP_006662506.2 zinc finger CCHH domain-containing protein 19-like                                                                                   |
| TCONS_00031449 | -0.162203 | 0.458242   | 0.145192   | BGIOSGA003758 |                                                                                                                                                     |

transcriptome

|                |           |            |             |               |                                                                                                                 |
|----------------|-----------|------------|-------------|---------------|-----------------------------------------------------------------------------------------------------------------|
| TCONS_00020578 | -0.162155 | 1.21251    | 0.277152    | BGIOSGA005214 | XP_015696844.1 uncharacterized CRM domain-containing protein At3g25440, chloroplastic isoform X2                |
| TCONS_00022920 | -0.162108 | -0.200173  | -0.261047   | BGIOSGA033393 | XP_006656500.1 probable protein phosphatase 2C 60                                                               |
| TCONS_00022086 | -0.162066 | 1.55742    | -0.406918   | BGIOSGA017709 | XP_006656893.1 leucine-rich repeat receptor-like serine/threonine/tyrosine-protein kinase SOBIR1                |
| TCONS_00011806 | -0.162009 | -0.0802381 | -0.302645   | BGIOSGA011200 | XP_015690965.1PREDICTED: uncharacterized protein LOC102706926                                                   |
| TCONS_00012276 | -0.161972 | -0.167948  | -0.890692   | BGIOSGA010728 | XP_006650083.1 E3 ubiquitin-protein ligase RING1-like                                                           |
| TCONS_00021332 | -0.161942 | -0.592148  | 0.838405    | BGIOSGA023560 | XP_002437547.1protein APEM9                                                                                     |
| TCONS_00032819 | -0.161937 | -1.98116   | -2.66468    | BGIOSGA034655 | XP_020403558.1uncharacterized LOC100501783 isoform X1                                                           |
| TCONS_00002140 | -0.161693 | 1.23091    | 0.992937    | BGIOSGA017914 | XP_006644980.1 50S ribosomal protein L17-like                                                                   |
| TCONS_00014216 | -0.161601 | 0.108091   | -2.26087    | BGIOSGA016371 | XP_015691866.1 glycine-rich RNA-binding protein 4, mitochondrial isoform X1                                     |
| TCONS_00005475 | -0.161551 | -0.410956  | 0.0681594   | BGIOSGA022638 | XP_015688777.1 TATA-binding protein-associated factor BTAF1 isoform X1                                          |
| TCONS_00024068 | -0.161336 | -0.309584  | 0.139587    | BGIOSGA026102 | XP_006657942.1PREDICTED: uncharacterized protein LOC102707787                                                   |
| TCONS_00019342 | -0.161292 | -0.315487  | -0.305675   | BGIOSGA030346 | XP_010910914.1 serine hydroxymethyltransferase 7-like                                                           |
| TCONS_00024025 | -0.161075 | 0.470094   | -0.262172   | #N/A          | #N/A                                                                                                            |
| TCONS_00024793 | -0.161067 | 0.476555   | 0.115666    | BGIOSGA025155 | XP_015694782.1 40S ribosomal protein S12-like                                                                   |
| TCONS_00004676 | -0.16102  | 0.385199   | -0.154636   | BGIOSGA009558 | XP_006654522.1 40S ribosomal protein S23                                                                        |
| TCONS_00016073 | -0.160964 | -0.0950168 | -0.235905   | BGIOSGA014907 | XP_015692053.1PREDICTED: uncharacterized protein LOC102718921                                                   |
| TCONS_00034721 | -0.160904 | 0.00603335 | -0.00403165 | BGIOSGA034107 | XP_024314657.1uncharacterized protein LOC100822022                                                              |
| TCONS_00036485 | -0.160615 | 1.13123    | 2.67558     | BGIOSGA019389 | XP_015698376.1 glycine-rich RNA-binding protein GRP1A-like                                                      |
| TCONS_00025361 | -0.16056  | -0.074608  | 0.0814676   | BGIOSGA025656 | XP_006658707.1PREDICTED: uncharacterized protein At4g19900                                                      |
| TCONS_00009893 | -0.160378 | 0.71347    | 0.801576    | BGIOSGA012445 | XP_024311582.1peroxisomal membrane protein 11-3                                                                 |
| TCONS_00005066 | -0.160223 | -0.820488  | 0.36846     | BGIOSGA018172 | XP_004971209.1tyrosine-protein phosphatase non-receptor type 23                                                 |
| TCONS_00030575 | -0.16019  | 1.07678    | -0.0178456  | BGIOSGA026471 | XP_015696838.1 ABC transporter F family member 1-like                                                           |
| TCONS_00029527 | -0.16015  | -0.40893   | -0.645364   | BGIOSGA017586 | XP_010910663.1 arogenate dehydratase/prephenate dehydratase 6, chloroplastic-like                               |
| TCONS_00025602 | -0.160007 | -1.65907   | -1.03645    | #N/A          | XP_015699208.1 replication protein A 70 kDa DNA-binding subunit D-like isoform X2                               |
| TCONS_00036393 | -0.159938 | 0.122514   | -0.473161   | BGIOSGA036536 | XP_006664178.1 eukaryotic translation initiation factor 2 subunit gamma                                         |
| TCONS_00006937 | -0.159927 | 0.607863   | -0.23088    | BGIOSGA009963 | XP_015689484.1 mitogen-activated protein kinase kinase kinase 1-like                                            |
| TCONS_00005827 | -0.159917 | -0.252899  | -0.864184   | BGIOSGA020042 | XP_015689545.1 TOM1-like protein 2                                                                              |
| TCONS_00014683 | -0.159903 | -0.561016  | -2.23928    | BGIOSGA016856 | XP_002446872.1uncharacterized protein LOC8083337                                                                |
| TCONS_00024847 | -0.159651 | 1.48353    | 0.353399    | BGIOSGA003314 | XP_002459628.1IAA-amino acid hydrolase ILR1-like 9                                                              |
| TCONS_00004264 | -0.159459 | 0.537734   | -1.23204    | BGIOSGA034410 | XP_006646253.1 IAA-amino acid hydrolase ILR1-like 2                                                             |
| TCONS_00021522 | -0.159394 | -0.94621   | -0.849278   | BGIOSGA028899 | XP_015694186.1 oligopeptide transporter 7-like                                                                  |
| TCONS_00023739 | -0.159374 | -0.32002   | 0.947966    | BGIOSGA025772 | XP_006657743.1 transcription factor GTE9-like                                                                   |
| TCONS_00036699 | -0.159324 | 0.640657   | -1.00998    | BGIOSGA036611 | XP_024317377.1 pentatricopeptide repeat-containing protein At1g09820-like                                       |
| TCONS_00011248 | -0.159179 | 0.129474   | 0.600648    | BGIOSGA013847 | XP_015690709.1 RNA-binding protein 28 isoform X1                                                                |
| TCONS_00027891 | -0.159095 | 0.367351   | -0.0105455  | BGIOSGA004248 | NP_001336948.1uncharacterized LOC100382599                                                                      |
| TCONS_00004849 | -0.159018 | -0.503714  | -0.281353   | BGIOSGA000370 | XP_015691366.1PREDICTED: uncharacterized protein LOC102700194                                                   |
| TCONS_00020182 | -0.15901  | 0.974127   | 0.68982     | BGIOSGA022373 | XP_010228003.1subtilisin-like protease SBT6.1                                                                   |
| TCONS_00019346 | -0.158864 | -1.54355   | -0.272224   | BGIOSGA027817 | XP_015692608.1 carboxymethylenebutenolidase homolog                                                             |
| TCONS_00023071 | -0.158839 | -0.361943  | -0.970937   | BGIOSGA024973 | XP_006657430.1PREDICTED: uncharacterized protein LOC102702861 isoform X1                                        |
| TCONS_00030968 | -0.15836  | 0.200546   | 0.480597    | BGIOSGA032777 | XP_006661718.1PREDICTED: uncharacterized protein LOC102699989                                                   |
| TCONS_00024761 | -0.158129 | 0.0706819  | -0.390298   | BGIOSGA019815 | XP_014753334.1nitrate regulatory gene2 protein                                                                  |
| TCONS_00015133 | -0.158043 | -0.352945  | 0.370147    | BGIOSGA020883 | XP_015692062.1 zinc finger CCCH domain-containing protein 31                                                    |
| TCONS_00021815 | -0.158023 | 0.425396   | 0.362818    | BGIOSGA025296 | XP_006655898.2 putative transcription elongation factor SPT5 homolog 1                                          |
| TCONS_00004877 | -0.157987 | -2.00578   | -1.83717    | BGIOSGA019042 | XP_015690627.1 pectin acetyltransferase 5-like                                                                  |
| TCONS_00001288 | -0.157972 | 0.235648   | -0.101755   | BGIOSGA006852 | XP_015697908.1 serine/threonine protein phosphatase 2A 55 kDa regulatory subunit B beta isoform-like isoform X1 |
| TCONS_00003357 | -0.157726 | 0.0848283  | 0.265137    | BGIOSGA036803 | XP_004967622.1aspartic proteinase                                                                               |
| TCONS_00035655 | -0.157716 | -0.641548  | 0.418161    | BGIOSGA037079 | XP_006664381.2PREDICTED: uncharacterized protein LOC102715439                                                   |
| TCONS_00015019 | -0.157569 | -0.158136  | -0.238483   | BGIOSGA000693 | XP_006652876.1 diacylglycerol kinase 5-like                                                                     |
| TCONS_00028092 | -0.157483 | -0.270224  | -0.422431   | BGIOSGA017255 | XP_002445584.1D-3-phosphoglycerate dehydrogenase 2, chloroplastic                                               |
| TCONS_00004678 | -0.157423 | -1.02706   | -0.520853   | BGIOSGA012365 | XP_006644969.1 TBC1 domain family member 8B                                                                     |
| TCONS_00020890 | -0.157386 | -0.122521  | -0.00573539 | BGIOSGA003919 | XP_010227595.1serine/threonine protein phosphatase 2A 55 kDa regulatory subunit B alpha isoform isoform X2      |



transcriptome

|                |           |            |             |               |                                                                                              |
|----------------|-----------|------------|-------------|---------------|----------------------------------------------------------------------------------------------|
| TCONS_00009041 | -0.157305 | -1.23271   | -1.75688    | BGIOSGA005362 | XP_008677475.1ABC(yeast) homolog 1 isoform X1                                                |
| TCONS_00009321 | -0.157223 | 0.689494   | 0.0369021   | BGIOSGA030304 | XP_006649404.1 calmodulin-binding receptor-like cytoplasmic kinase 2                         |
| TCONS_00023583 | -0.157153 | -2.84154   | -1.28664    | BGIOSGA035928 | XP_002461109.2disease resistance RPP8-like protein 3                                         |
| TCONS_00033676 | -0.15711  | -1.01257   | 0.00952138  | BGIOSGA018472 | XP_021314164.1achilleol B synthase-like isoform X3                                           |
| TCONS_00016284 | -0.157081 | -0.0510912 | 0.0667797   | BGIOSGA014686 | XP_003580169.2large ribosomal RNA subunit accumulation protein YCED homolog 2, chloroplastic |
| TCONS_00012044 | -0.157004 | 0.506615   | -0.416971   | BGIOSGA010963 | XP_006649886.1 50S ribosomal protein L10, chloroplastic-like                                 |
| TCONS_00014122 | -0.156918 | 0.103129   | 0.0494435   | BGIOSGA026527 | XP_003574549.1transcription factor MYB30                                                     |
| TCONS_00014916 | -0.156825 | -1.85481   | -1.54665    | BGIOSGA034013 | XP_006652803.2 ent-kaur-16-ene synthase, chloroplastic isoform X1                            |
| TCONS_00024222 | -0.156817 | -0.239077  | 0.0450336   | BGIOSGA026263 | XP_003562559.1BSD domain-containing protein 1                                                |
| TCONS_00001385 | -0.156546 | -0.52714   | 0.301704    | BGIOSGA023898 | XP_006644383.1 calcium-dependent protein kinase 3-like                                       |
| TCONS_00024739 | -0.156538 | 0.345036   | -0.264772   | BGIOSGA024637 | XP_006658384.1 DNA damage-binding protein 1                                                  |
| TCONS_00034088 | -0.156499 | -0.662841  | -0.874364   | BGIOSGA037624 | XP_002464589.1osmotin-like protein                                                           |
| TCONS_00022627 | -0.156349 | -0.405038  | 0.336772    | BGIOSGA007697 | NP_001150336.1cyclase precursor                                                              |
| TCONS_00021130 | -0.156236 | 0.767563   | -0.247541   | BGIOSGA023352 | XP_006656286.1 ESCRT-related protein CHMP1                                                   |
| TCONS_00001538 | -0.156194 | -0.30282   | -0.167874   | BGIOSGA004169 | XP_006646183.1 protein VACUOLELESS1                                                          |
| TCONS_00000086 | -0.156183 | 0.476996   | -0.308057   | BGIOSGA015550 | XP_015698231.1 DEXH-box ATP-dependent RNA helicase DEXH3-like                                |
| TCONS_00009943 | -0.156057 | 0.301819   | 0.267886    | BGIOSGA033915 | XP_006649980.1 probable pre-mRNA-splicing factor ATP-dependent RNA helicase DEAH2            |
| TCONS_00019902 | -0.155902 | -0.644618  | -1.12282    | BGIOSGA010354 | XP_006654863.1 AAA-ATPase At3g50940-like                                                     |
| TCONS_00030347 | -0.155861 | -0.330735  | -1.08053    | BGIOSGA015096 | XP_006661423.1 beta-glucosidase 31                                                           |
| TCONS_00017106 | -0.155638 | 0.39053    | -1.19107    | BGIOSGA000169 | XP_004960436.1 uncharacterized protein LOC101774563                                          |
| TCONS_00034329 | -0.155569 | -0.0176673 | -1.28775    | BGIOSGA037596 | XP_015698016.1 ABC transporter C family member 10-like                                       |
| TCONS_00013492 | -0.155504 | -0.329342  | -0.815558   | BGIOSGA037529 | XP_006650861.1 acyl-CoA-binding domain-containing protein 4-like                             |
| TCONS_00004610 | -0.155501 | -1.86922   | -0.0540125  | BGIOSGA005107 | XP_006644890.2 beta-glucosidase 2-like                                                       |
| TCONS_00016914 | -0.155355 | -0.301725  | 0.843186    | BGIOSGA021607 | XP_006653061.1 putative pentatricopeptide repeat-containing protein At3g15130                |
| TCONS_00015997 | -0.15524  | -3.65437   | -2.25096    | BGIOSGA005593 | XP_006652354.2PREDICTED: uncharacterized protein LOC102706094                                |
| TCONS_00004967 | -0.155098 | 0.693053   | 0.24129     | BGIOSGA005200 | XP_015699140.1 THO complex subunit 2 isoform X1                                              |
| TCONS_00038356 | -0.154993 | -1.20366   | -0.858975   | BGIOSGA024171 | XP_002453153.2probable nucleolar protein 5-2                                                 |
| TCONS_00008403 | -0.154961 | -0.490601  | 0.455966    | BGIOSGA006019 | XP_006647532.1 E3 ubiquitin-protein ligase PRT1-like                                         |
| TCONS_00002317 | -0.154806 | -2.65491   | -0.608178   | BGIOSGA016395 | XP_010239693.1G-type lectin S-receptor-like serine/threonine-protein kinase At2g19130        |
| TCONS_00010075 | -0.154783 | 0.343043   | 0.983914    | BGIOSGA012620 | XP_003557836.1nuclear/nucleolar GTPase 2                                                     |
| TCONS_00029957 | -0.154781 | 1.08652    | 0.140221    | BGIOSGA016852 | XP_006661183.1 homeobox-leucine zipper protein HOX25-like                                    |
| TCONS_00017515 | -0.154749 | -3.30247   | -0.539355   | BGIOSGA034485 | XP_006655183.2 hippocampus abundant transcript 1 protein-like                                |
| TCONS_00018565 | -0.154548 | -1.10937   | -0.297053   | BGIOSGA001018 | XP_015693140.1 long chain acyl-CoA synthetase 1                                              |
| TCONS_00006298 | -0.154537 | 0.829547   | 1.47391     | BGIOSGA017178 | XP_015689340.1 polyadenylate-binding protein RBP47-like isoform X2                           |
| TCONS_00018526 | -0.154358 | 0.431983   | -0.00522119 | BGIOSGA012376 | XP_004960337.1probable sugar phosphate/phosphate translocator At3g11320                      |
| TCONS_00004867 | -0.154358 | 1.01128    | 0.876134    | BGIOSGA036382 | XP_006645148.2 rhodanese-like domain-containing protein 4A, chloroplastic                    |
| TCONS_00034385 | -0.154312 | -0.30673   | -1.09577    | BGIOSGA019844 | XP_006662769.1 fructose-bisphosphate aldolase, chloroplastic                                 |
| TCONS_00030601 | -0.154272 | -1.84192   | -1.41726    | BGIOSGA011659 | XP_006662140.2 protein NRT1/ PTR FAMILY 8.3-like                                             |
| TCONS_00004688 | -0.154262 | -0.340638  | -0.51916    | BGIOSGA002461 | XP_006646465.1 metal tolerance protein 5                                                     |
| TCONS_00018095 | -0.154012 | 1.56241    | -0.487584   | BGIOSGA025454 | XP_006654617.1 calreticulin-3-like                                                           |
| TCONS_00005538 | -0.153849 | -1.56711   | -1.39754    | BGIOSGA014385 | XP_006646953.1 probable cation transporter HKT6                                              |
| TCONS_00002459 | -0.153654 | 0.669258   | -0.879904   | BGIOSGA033885 | XP_006646641.1PREDICTED: uncharacterized protein LOC102718238                                |
| TCONS_00024652 | -0.153621 | -1.70774   | 0.0411536   | BGIOSGA020215 | XP_006663021.1 non-specific phospholipase C4-like                                            |
| TCONS_00032906 | -0.153477 | -1.0644    | 1.36726     | BGIOSGA021840 | XP_015698694.1 putative receptor protein kinase ZmPK1 isoform X1                             |
| TCONS_00016523 | -0.15281  | 0.37012    | 0.649153    | BGIOSGA014445 | XP_015691559.1 transducin beta-like protein 3                                                |
| TCONS_00004672 | -0.152598 | -0.022076  | 0.804027    | BGIOSGA017401 | XP_006644963.1 coatomer subunit delta-3                                                      |
| TCONS_00035364 | -0.152573 | 0.014699   | -1.67261    | BGIOSGA024778 | XP_022679613.1cysteine-rich receptor-like protein kinase 10                                  |
| TCONS_00009046 | -0.15256  | 0.224285   | 0.154611    | BGIOSGA033076 | XP_006649171.1 3-ketoacyl-CoA thiolase 2, peroxisomal                                        |
| TCONS_00033869 | -0.152228 | -0.0954736 | 0.208963    | BGIOSGA010054 | XP_006663061.2 vacuolar protein sorting-associated protein 26A-like                          |
| TCONS_00020004 | -0.151986 | 0.699837   | 0.48725     | BGIOSGA013577 | XP_004964371.1multiple organellar RNA editing factor 2, chloroplastic                        |
| TCONS_00005673 | -0.151276 | 0.699886   | 1.05915     | BGIOSGA028621 | XP_006648455.1 aminopeptidase M1-A                                                           |
| TCONS_00016322 | -0.151019 | 0.649504   | 0.0592803   | BGIOSGA005947 | XP_015691528.1 autophagy-related protein 13a-like                                            |
| TCONS_00014752 | -0.150938 | 0.487648   | -1.05716    | BGIOSGA016039 | XP_006652647.1 cis-zeatin O-glucosyltransferase 1-like                                       |
| TCONS_00014839 | -0.150827 | 0.427545   | 0.782512    | BGIOSGA037690 | XP_015698346.1 protein misato homolog 1                                                      |

transcriptome

|                |           |            |            |               |                                                                                                          |
|----------------|-----------|------------|------------|---------------|----------------------------------------------------------------------------------------------------------|
| TCONS_00008578 | -0.150815 | 0.014355   | 0.572318   | BGIOSGA007844 | XP_015688924.1PREDICTED: LOW QUALITY PROTEIN: uncharacterized protein LOC102711226                       |
| TCONS_00008612 | -0.150269 | 0.80874    | -0.0859384 | BGIOSGA031377 | XP_003570129.1serine/arginine repetitive matrix protein 1                                                |
| TCONS_00001754 | -0.1502   | 0.0323188  | 0.913618   | BGIOSGA021890 | XP_003569726.1uncharacterized protein LOC100836957                                                       |
| TCONS_00001136 | -0.150083 | 0.0430531  | 0.862992   | BGIOSGA003761 | XP_006646001.2 probable zinc protease PqQL XP_004976560.1putative FBD-associated F-box protein At1g61330 |
| TCONS_00016656 | -0.150083 | -0.973     | 0.156029   | BGIOSGA029488 | XP_006647337.1 copper transport protein ATX1                                                             |
| TCONS_00008113 | -0.150054 | -2.91474   | -2.15763   | BGIOSGA006337 | XP_003577345.1p21-activated protein kinase-interacting protein 1-like                                    |
| TCONS_00036429 | -0.149745 | 1.82689    | 1.93186    | BGIOSGA037798 | XP_006650375.1PREDICTED: uncharacterized protein LOC102702737 isoform X1                                 |
| TCONS_00012864 | -0.149706 | 0.785405   | 0.869513   | BGIOSGA010112 | XP_006644304.1 protein ROOT HAIR DEFECTIVE 3                                                             |
| TCONS_00001187 | -0.149687 | 0.313827   | 0.353832   | BGIOSGA003817 | XP_006653034.1 stem-specific protein TSJT1                                                               |
| TCONS_00016880 | -0.149509 | -0.437246  | 1.92598    | BGIOSGA009831 | XP_006657746.1 mitotic checkpoint serine/threonine-protein kinase BUB1                                   |
| TCONS_00023742 | -0.149454 | 0.35265    | -0.350632  | BGIOSGA034240 | XP_015697370.1 cellulose synthase A catalytic subunit 7 [UDP-forming]                                    |
| TCONS_00031290 | -0.149213 | -7.30782   | -1.68193   | BGIOSGA025466 | XP_006663878.1 GDP-L-galactose phosphorylase 2-like                                                      |
| TCONS_00036813 | -0.148926 | 0.731239   | -2.07331   | BGIOSGA036501 | XP_006648090.2 translation initiation factor eIF-2B subunit epsilon                                      |
| TCONS_00007081 | -0.148729 | 1.1811     | 1.33971    | BGIOSGA009264 | XP_006647675.1 transcription factor bHLH157-like                                                         |
| TCONS_00006629 | -0.148683 | 0.568136   | -1.0946    | BGIOSGA034846 | XP_015696028.1 protein CHROMATIN REMODELING 35-like                                                      |
| TCONS_00025002 | -0.148641 | -0.300894  | -0.840431  | BGIOSGA027385 | XP_006663283.1 F-box/LRR-repeat protein At3g59190-like                                                   |
| TCONS_00034487 | -0.148614 | -0.824782  | 0.653428   | BGIOSGA034330 | XP_015693921.1 putative glycerol-3-phosphate transporter 5                                               |
| TCONS_00021724 | -0.148415 | 0.75993    | 0.726935   | BGIOSGA008730 | XP_006659473.1PREDICTED: uncharacterized protein LOC102704077                                            |
| TCONS_00026733 | -0.148402 | -0.295738  | -0.280953  | BGIOSGA028796 | XP_006652588.1 NAD(P)H-quinone oxidoreductase subunit M, chloroplast                                     |
| TCONS_00014674 | -0.14828  | -0.0269127 | -1.60856   | BGIOSGA016844 | XP_015689262.1 cyclin-dependent kinase A-2                                                               |
| TCONS_00005307 | -0.148113 | -0.0171348 | -0.277312  | BGIOSGA006838 | XP_008807445.1PREDICTED: uncharacterized protein LOC103719813 isoform X1                                 |
| TCONS_00014117 | -0.148113 | -0.899032  | 0.172885   | BGIOSGA025856 | XP_015692184.1 gamma-tubulin complex component 2 isoform X2                                              |
| TCONS_00014550 | -0.148074 | -0.230008  | 0.0901647  | BGIOSGA016713 | XP_006656799.1 cytochrome P450 76C2-like                                                                 |
| TCONS_00022096 | -0.147994 | 0.648371   | 1.01868    | BGIOSGA035933 | XP_006650460.1 beta-glucosidase 8 isoform X2                                                             |
| TCONS_00013023 | -0.147634 | -1.53651   | 0.53236    | BGIOSGA020209 | XP_006662306.1 ras-related protein Rab11D-like                                                           |
| TCONS_00032099 | -0.147519 | 0.683335   | 0.17191    | BGIOSGA031125 | XP_015693312.1 SNF2 domain-containing protein CLASSY 3-like                                              |
| TCONS_00017748 | -0.14745  | -0.0847983 | 0.665497   | BGIOSGA011506 | XP_002456925.1scarecrow-like protein 3                                                                   |
| TCONS_00002519 | -0.147408 | -0.458596  | -0.426621  | BGIOSGA029476 | XP_006662707.1 glutamine-fructose-6-phosphate aminotransferase [isomerizing] 2-like                      |
| TCONS_00034236 | -0.147053 | 1.5883     | 0.861077   | BGIOSGA036685 | XP_006654182.1 random slug protein 5-like                                                                |
| TCONS_00018953 | -0.147025 | -2.09651   | -1.05762   | BGIOSGA018410 | XP_015689393.1 U2 snRNP-associated SURP motif-containing protein-like isoform X1                         |
| TCONS_00005556 | -0.146891 | 0.196179   | 0.127554   | BGIOSGA005227 | XP_006653553.1 transcription factor bHLH128-like                                                         |
| TCONS_00014489 | -0.146609 | 1.47167    | 0.791731   | BGIOSGA023462 | XP_006656531.2 lysine-specific demethylase 5B-B                                                          |
| TCONS_00022953 | -0.146548 | -0.031386  | 0.226343   | BGIOSGA020494 | XP_006649456.1 protein ROOT PRIMORDIUM DEFECTIVE 1-like                                                  |
| TCONS_00035011 | -0.14637  | 0.433182   | 0.777257   | BGIOSGA011984 | XP_006649822.1 digalactosyldiacylglycerol synthase 2, chloroplast-like                                   |
| TCONS_00011975 | -0.146269 | -0.575086  | 0.344293   | BGIOSGA011217 | XP_006648723.2 protein disulfide isomerase-like 5-3                                                      |
| TCONS_00006245 | -0.146255 | 1.67511    | 0.342571   | BGIOSGA003439 | XP_006655678.1 probable methyltransferase PMT17 isoform X1                                               |
| TCONS_00021441 | -0.146157 | -0.206588  | -0.161258  | BGIOSGA033474 | XP_006647126.1 cyclic nucleotide-gated ion channel 1                                                     |
| TCONS_00007722 | -0.146041 | -0.331539  | -0.383046  | BGIOSGA017229 | XP_003568548.1PH, RCC1 and FYVE domains-containing protein 1                                             |
| TCONS_00019215 | -0.14594  | 0.453149   | -0.288211  | BGIOSGA000098 | XP_010236068.1STOREKEEPER protein                                                                        |
| TCONS_00008874 | -0.145903 | 0.60563    | 0.0215748  | BGIOSGA022526 | XP_015690203.1 ubiquinone biosynthesis monooxygenase COQ6, mitochondrial isoform X2                      |
| TCONS_00013500 | -0.145881 | -0.713495  | 0.319136   | BGIOSGA009484 | XP_006657781.1 thiamine thiazole synthase 2, chloroplast                                                 |
| TCONS_00023818 | -0.145757 | 0.309124   | 0.799723   | BGIOSGA037056 | XP_010231335.1neurofilament medium polypeptide                                                           |
| TCONS_00017345 | -0.145664 | -0.260091  | 0.366171   | BGIOSGA006958 | XP_004953612.1tubby-like F-box protein 5                                                                 |
| TCONS_00006718 | -0.145599 | -0.540634  | 0.262014   | BGIOSGA025336 | XP_015689608.1 coatomer subunit delta-1 isoform X1                                                       |
| TCONS_00017524 | -0.14547  | -0.474078  | -0.110582  | BGIOSGA000544 | XP_008644627.2 atherin                                                                                   |
| TCONS_00010633 | -0.145298 | 0.394706   | -0.526657  | BGIOSGA037843 | XP_006661796.2 RNA-binding protein 39-like                                                               |
| TCONS_00031203 | -0.144796 | 0.239796   | 0.298956   | BGIOSGA034370 | XP_006659528.1 serine/threonine-protein kinase D6PK-like                                                 |
| TCONS_00026842 | -0.144662 | 0.603271   | 0.0932537  | BGIOSGA030966 | XP_006651187.1 conserved oligomeric Golgi complex subunit 6                                              |
| TCONS_00009609 | -0.144631 | 0.0517551  | 0.391622   | BGIOSGA012154 | XP_006654023.1 DNA-directed RNA polymerases I and III subunit rpa1                                       |
| TCONS_00012081 | -0.144484 | -0.122501  | 0.0320834  | BGIOSGA005710 | XP_002462619.2uncharacterized protein LOC8058965                                                         |
| TCONS_00000207 | -0.144461 | 2.10138    | 0.409655   | BGIOSGA037366 | XP_003575297.1cytosolic Fe-S cluster assembly factor NBP35                                               |
| TCONS_00016132 | -0.144398 | 0.0348038  | -0.043016  | BGIOSGA006108 |                                                                                                          |

transcriptome

|                |           |            |             |               |                                                                                                        |
|----------------|-----------|------------|-------------|---------------|--------------------------------------------------------------------------------------------------------|
| TCONS_00022375 | -0.144319 | -0.075052  | 0.30128     | BGIOSGA024906 | XP_006657033.1PREDICTED: uncharacterized protein LOC102705262                                          |
| TCONS_00026156 | -0.144263 | 0.603693   | 1.21904     | BGIOSGA014392 | XP_006659226.1PREDICTED: uncharacterized protein LOC102722514                                          |
| TCONS_00012070 | -0.144257 | -0.0216637 | -0.00448405 | BGIOSGA010938 | XP_004984863.1pyruvate decarboxylase 2                                                                 |
| TCONS_00009272 | -0.144102 | 0.310746   | -0.442636   | BGIOSGA011810 | XP_004985783.1uncharacterized protein LOC101755008                                                     |
| TCONS_00002752 | -0.144042 | 0.468157   | -0.143798   | BGIOSGA002466 | XP_006643698.1 transmembrane protein 214-A-like                                                        |
| TCONS_00017884 | -0.143741 | -2.71886   | -1.30584    | #N/A          | #N/A                                                                                                   |
| TCONS_00011255 | -0.143712 | 0.0541536  | -0.116411   | #N/A          | XP_006650827.1 zinc finger CCHH domain-containing protein 25                                           |
| TCONS_00016832 | -0.143649 | 0.494037   | 1.25735     | BGIOSGA014131 | XP_003580782.1probable carboxylesterase Os04g0669500                                                   |
| TCONS_00025728 | -0.143615 | -0.719014  | 1.50119     | BGIOSGA023693 | XP_006658982.1 E3 ubiquitin-protein ligase RHA2A-like                                                  |
| TCONS_00026163 | -0.143472 | 1.39675    | 0.0305949   | BGIOSGA038424 | XP_012700639.1exocyst complex component EXO70B1                                                        |
| TCONS_00019929 | -0.143407 | 0.578689   | 0.585523    | BGIOSGA006432 | XP_006655666.1 structural maintenance of chromosomes protein 5                                         |
| TCONS_00013087 | -0.143316 | -0.783787  | -0.78459    | BGIOSGA009927 | XP_023157350.1F-box/FBD/LRR-repeat protein At1g13570-like isoform X1                                   |
| TCONS_00015648 | -0.143309 | -1.22147   | 0.537657    | BGIOSGA015337 | XP_006653273.1 aspartic proteinase-like protein 2                                                      |
| TCONS_00025543 | -0.142969 | -0.728766  | -1.99109    | BGIOSGA031387 | XP_015694732.1 phospho-2-dehydro-3-deoxyheptanate aldolase 2, chloroplastic                            |
| TCONS_00014160 | -0.142958 | -0.380647  | 0.516662    | BGIOSGA029072 | XP_006653348.1 glycine-tRNA ligase, mitochondrial 1-like                                               |
| TCONS_00004984 | -0.142895 | 0.0575303  | -0.143213   | BGIOSGA015212 | XP_006645242.1 dynamin-related protein 3B-like isoform X1                                              |
| TCONS_00000380 | -0.142853 | -0.109532  | 0.335326    | BGIOSGA026350 | XP_002457168.1probable serine/threonine-protein kinase At1g54610                                       |
| TCONS_00037152 | -0.142698 | -0.317743  | 0.200005    | BGIOSGA013281 | XP_006664875.1 glioma tumor suppressor candidate region gene 1 protein                                 |
| TCONS_00021742 | -0.142512 | -0.306999  | 0.29686     | BGIOSGA018822 | XP_015694099.1 CHD3-type chromatin-remodeling factor PICKLE-like                                       |
| TCONS_00023252 | -0.142502 | -0.570978  | -0.636853   | BGIOSGA025294 | XP_015695166.1 probable D-2-hydroxyglutarate dehydrogenase, mitochondrial                              |
| TCONS_00030151 | -0.142496 | 0.506829   | -0.943507   | BGIOSGA006225 | XP_006660681.2 beta-1,3-galactosyltransferase 7-like                                                   |
| TCONS_00000181 | -0.14248  | 0.151093   | 0.761791    | BGIOSGA004696 | XP_006643736.2 mucin-5AC-like                                                                          |
| TCONS_00023015 | -0.142429 | -1.82132   | 0.0937405   | BGIOSGA011246 | XP_015695059.1PREDICTED: uncharacterized protein LOC107304628                                          |
| TCONS_00005211 | -0.142351 | 0.0139658  | 0.449941    | BGIOSGA007323 | XP_003570759.1translation initiation factor IF3-1, mitochondrial                                       |
| TCONS_00017788 | -0.142242 | -0.0015212 | -0.45062    | BGIOSGA019851 | XP_006654386.1 autophagy-related protein 18h-like                                                      |
| TCONS_00010296 | -0.142109 | -0.469408  | -0.897046   | BGIOSGA020407 | XP_002467695.1nuclear transcription factor Y subunit B-8                                               |
| TCONS_00032785 | -0.142009 | -0.883292  | -1.31929    | BGIOSGA031322 | XP_006662109.1 D-xylose-proton symporter-like 2                                                        |
| TCONS_00031447 | -0.142001 | -0.0902321 | 0.594959    | BGIOSGA023970 | XP_006661946.1 probable serine protease EDA2                                                           |
| TCONS_00019317 | -0.141996 | -0.350169  | -0.125046   | BGIOSGA018031 | XP_006655338.1PREDICTED: uncharacterized protein LOC102722018                                          |
| TCONS_00009547 | -0.141966 | -1.69842   | -0.723006   | BGIOSGA012092 | XP_006649611.1PREDICTED: uncharacterized protein LOC102716853                                          |
| TCONS_00002872 | -0.141948 | -0.425955  | 1.37078     | BGIOSGA018751 | XP_006645523.1 acyl-coenzyme A oxidase 4, peroxisomal-like                                             |
| TCONS_00036359 | -0.141168 | -1.47822   | 0.809881    | BGIOSGA037726 | XP_006664164.1 phosphatidylinositol-glycan biosynthesis class X protein isoform X1                     |
| TCONS_00009640 | -0.141165 | 0.729693   | 0.374682    | BGIOSGA033422 | XP_006649688.2 probable E3 ubiquitin-protein ligase ARI2                                               |
| TCONS_00028996 | -0.141392 | 0.978705   | 1.38867     | BGIOSGA030754 | XP_021319724.1uncharacterized protein LOC8074706 isoform X1                                            |
| TCONS_00018637 | -0.141342 | 0.646028   | 0.709231    | BGIOSGA003530 | XP_006654051.1 cullin-1-like                                                                           |
| TCONS_00031675 | -0.141339 | 0.100513   | -0.630877   | BGIOSGA033494 | XP_015697092.1 probable plastid-lipid-associated protein 3, chloroplastic                              |
| TCONS_00009055 | -0.141307 | 0.76537    | -0.173602   | BGIOSGA031832 | XP_006648129.1 probable receptor-like protein kinase At5g47070                                         |
| TCONS_00003521 | -0.141285 | 0.44315    | 0.424753    | BGIOSGA001682 | XP_006645880.1 ubiquitin-like-specific protease ESD4                                                   |
| TCONS_00034873 | -0.141244 | -0.345358  | 0.365976    | BGIOSGA028447 | XP_006662940.1 probable bifunctional methylthioribulose-1-phosphate dehydratase/enolase-phosphatase E1 |
| TCONS_00015168 | -0.141195 | -1.0341    | 0.192229    | BGIOSGA017350 | XP_006653878.1 probable protein arginine N-methyltransferase 6.1                                       |
| TCONS_00017456 | -0.141129 | 0.403468   | -0.248303   | BGIOSGA019531 | XP_015693280.1PREDICTED: uncharacterized protein LOC102705435 isoform X2                               |
| TCONS_00012402 | -0.141011 | -1.21294   | -0.569307   | BGIOSGA007114 | XP_006650171.1 protein STRUBBELIG-RECEPTOR FAMILY 7                                                    |
| TCONS_00024271 | -0.140998 | -0.793598  | -0.121886   | BGIOSGA011079 | XP_015694758.1 rho GTPase-activating protein 7-like                                                    |
| TCONS_00007407 | -0.140901 | 0.276375   | 0.30077     | BGIOSGA007625 | XP_006646926.1 cullin-associated NEDD8-dissociated protein 1                                           |
| TCONS_00006863 | -0.140895 | -0.938533  | -0.659651   | BGIOSGA003209 | XP_002454287.1geranylgeranyl diphosphate reductase, chloroplastic                                      |
| TCONS_00004640 | -0.140876 | -0.885876  | 0.737556    | BGIOSGA036953 | XP_002458689.1RING-H2 finger protein ATL74                                                             |
| TCONS_00008173 | -0.140811 | 0.670794   | 0.283994    | BGIOSGA034095 | XP_006647370.1 phosphoinositide phosphatase SAC7-like                                                  |
| TCONS_00023588 | -0.140664 | -4.82351   | -2.04809    | BGIOSGA024383 | XP_003563185.1COP1-interacting protein 7                                                               |
| TCONS_00037865 | -0.140174 | -1.35448   | -0.673663   | BGIOSGA026308 | XP_006658904.2PREDICTED: uncharacterized protein LOC102712743                                          |
| TCONS_00030102 | -0.140151 | -0.220906  | -0.272727   | BGIOSGA028535 | XP_006661267.1 AT-rich interactive domain-containing protein 4                                         |

transcriptome

|                |           |            |            |               |                                                                                                                       |
|----------------|-----------|------------|------------|---------------|-----------------------------------------------------------------------------------------------------------------------|
| TCONS_00011722 | -0.139964 | -0.430739  | 0.55253    | BGIOSGA011288 | XP_006649556.1 ribosome biogenesis protein TSR3 homolog isoform X1<br>XP_006647680.1 RING-H2 finger protein ATL2-like |
| TCONS_00006635 | -0.139964 | -1.13856   | -0.730404  | BGIOSGA016948 | XP_015689360.1 protein ELC-like                                                                                       |
| TCONS_00009106 | -0.139849 | 1.28614    | 0.363985   | BGIOSGA031140 | XP_006663448.1 PREDICTED: uncharacterized protein LOC102714137                                                        |
| TCONS_00034353 | -0.139837 | -0.597956  | -0.0506168 | BGIOSGA033992 | XP_006664846.1 heterogeneous nuclear ribonucleoprotein R-like                                                         |
| TCONS_00035540 | -0.139662 | -0.309474  | -0.513653  | BGIOSGA034759 | XP_006648463.2 serine/threonine-protein kinase EDR1                                                                   |
| TCONS_00007619 | -0.139518 | 0.881768   | 0.73696    | BGIOSGA014370 | XP_015698329.1 calmodulin-binding protein 60 C-like                                                                   |
| TCONS_00036220 | -0.139496 | -0.020725  | -0.654193  | BGIOSGA037577 | XP_006663193.1 DNA-directed RNA polymerase V subunit 5A                                                               |
| TCONS_00034279 | -0.139495 | -0.608635  | -0.20107   | BGIOSGA007988 | XP_015698423.1 amino acid permease 3                                                                                  |
| TCONS_00036801 | -0.139395 | 0.277168   | 0.374015   | BGIOSGA000394 | XP_021307824.1 protein Rf1, mitochondrial                                                                             |
| TCONS_00032487 | -0.139306 | 0.18254    | -2.31702   | BGIOSGA027785 | XP_020400022.1 probable WRKY transcription factor 4 isoform X2                                                        |
| TCONS_00010370 | -0.139182 | -0.177868  | 0.610941   | BGIOSGA026734 | XP_004978619.1 phosphoglycerate mutase-like protein 4                                                                 |
| TCONS_00032918 | -0.138948 | -5.04673   | -4.63985   | BGIOSGA034535 | XP_006657401.1 60S ribosomal protein L13a-2-like                                                                      |
| TCONS_00024446 | -0.138834 | 1.51402    | 1.24538    | BGIOSGA017281 | XP_006650865.1 glycine-rich RNA-binding protein RZ1A isoform X2                                                       |
| TCONS_00013494 | -0.138819 | -0.100574  | -0.26468   | BGIOSGA009493 | NP_001169346.1 putative DUF1664 domain family protein                                                                 |
| TCONS_00000006 | -0.138813 | -0.198139  | 0.521841   | BGIOSGA018977 | XP_006657851.1 exocyst complex component EXO84C                                                                       |
| TCONS_00025364 | -0.138806 | -1.01094   | -0.490835  | BGIOSGA024066 | XP_004952654.140S ribosomal protein S14                                                                               |
| TCONS_00015860 | -0.138792 | 0.486084   | -0.32499   | BGIOSGA007344 | XP_006656905.1 PREDICTED: uncharacterized protein LOC102716700                                                        |
| TCONS_00022097 | -0.138736 | -0.272266  | -0.929114  | BGIOSGA022740 | XP_006647718.1 ubiquitin carboxyl-terminal hydrolase 21                                                               |
| TCONS_00006679 | -0.138722 | 1.41094    | 1.5357     | BGIOSGA008848 | XP_006649567.1 serine-tRNA ligase                                                                                     |
| TCONS_00001138 | -0.138395 | 0.217911   | 0.0571769  | BGIOSGA003763 | XP_015698145.1 RNA polymerase sigma factor sigB                                                                       |
| TCONS_00033411 | -0.138213 | -0.233009  | 0.320845   | BGIOSGA012312 | XP_006662057.1 PREDICTED: uncharacterized protein LOC102709773                                                        |
| TCONS_00031620 | -0.138166 | -0.601481  | -0.303221  | BGIOSGA005812 | XP_015689695.1 probable inactive receptor-like protein kinase At3g56050 isoform X2                                    |
| TCONS_00012078 | -0.138068 | -2.25893   | -0.813858  | BGIOSGA006959 | XP_003562405.1 tankyrin repeat and SAM domain-containing protein 6                                                    |
| TCONS_00013541 | -0.138011 | 1.27401    | 0.738629   | BGIOSGA009435 | XP_006664559.1 DEAD-box ATP-dependent RNA helicase 28                                                                 |
| TCONS_00037179 | -0.138001 | -0.0309277 | 0.87261    | BGIOSGA036195 | XP_006652815.1 probable potassium transporter 11                                                                      |
| TCONS_00016606 | -0.137831 | -0.709581  | -0.361321  | BGIOSGA028185 | XP_006644282.1 DEAD-box ATP-dependent RNA helicase 15                                                                 |
| TCONS_00001114 | -0.137807 | 0.0113344  | 0.369412   | BGIOSGA003735 | XP_006662810.1 extra-large guanine nucleotide-binding protein 3                                                       |
| TCONS_00034490 | -0.137646 | 0.103786   | -0.19322   | BGIOSGA022079 | XP_006656895.1 UDP-glycosyltransferase 708A6-like                                                                     |
| TCONS_00020552 | -0.137559 | -3.80237   | -1.19302   | BGIOSGA026166 | XP_006650856.1 probable polygalacturonase isoform X3                                                                  |
| TCONS_00011279 | -0.137533 | -0.814355  | -0.782312  | BGIOSGA004006 | XP_006653995.1 E3 SUMO-protein ligase SIZ1 isoform X2                                                                 |
| TCONS_00017042 | -0.13747  | 0.698768   | 0.551845   | BGIOSGA013466 | XP_006644312.2 lycopene epsilon cyclase, chloroplastic                                                                |
| TCONS_00001209 | -0.137439 | -0.880494  | -0.0351629 | BGIOSGA003830 | XP_006661957.1 protein CDI-like                                                                                       |
| TCONS_00032563 | -0.137319 | -1.1419    | -1.73703   | BGIOSGA038478 | XP_021304390.1L-type lectin-domain containing receptor kinase IV.1                                                    |
| TCONS_00024514 | -0.137201 | 1.55839    | 0.765175   | BGIOSGA024883 | XP_019078959.1 PREDICTED: uncharacterized protein LOC104881002                                                        |
| TCONS_00036998 | -0.137163 | -1.34855   | 0.128277   | BGIOSGA003481 | XP_006649265.1 pyridoxine/pyridoxamine 5'-phosphate oxidase 2                                                         |
| TCONS_00009183 | -0.137152 | -1.10344   | -0.975299  | BGIOSGA002764 | XP_015689310.1 ATP-dependent DNA helicase Q-like 3                                                                    |
| TCONS_00008921 | -0.137025 | -1.49093   | -0.593388  | BGIOSGA005487 | XP_006651820.1 binding partner of ACD11 1                                                                             |
| TCONS_00010958 | -0.136976 | 0.495092   | 0.0181862  | BGIOSGA013559 | XP_012474758.1 granule-bound starch synthase 1, chloroplastic/amyloplastic-like isoform X3                            |
| TCONS_00024968 | -0.136652 | -3.25751   | -3.97093   | BGIOSGA022241 | XP_004982050.1 mitogen-activated protein kinase kinase kinase 1                                                       |
| TCONS_00013026 | -0.136488 | 1.17339    | -0.212104  | BGIOSGA009117 | XP_015694021.1 protein RKD2-like                                                                                      |
| TCONS_00020394 | -0.136465 | -0.920591  | 0.48323    | BGIOSGA028034 | XP_006656279.1 PREDICTED: uncharacterized protein LOC102707685                                                        |
| TCONS_00022616 | -0.136306 | 1.57621    | 0.0345179  | BGIOSGA003899 | XP_006644369.1 zinc finger CCHC domain-containing protein 8-like                                                      |
| TCONS_00003986 | -0.136303 | -0.315834  | 0.42447    | BGIOSGA001204 | XP_003569359.1 SCY1-like protein 2                                                                                    |
| TCONS_00001362 | -0.136247 | 0.600824   | 0.657568   | BGIOSGA003993 | NP_001159086.2 dirigent-like protein pDIR3                                                                            |
| TCONS_00026497 | -0.135903 | -3.462     | -5.85854   | BGIOSGA034394 | XP_006644390.1 heat stress transcription factor C-1a-like                                                             |
| TCONS_00001395 | -0.135827 | -2.14379   | -3.32571   | BGIOSGA010844 | XP_021310531.1 hypersensitive-induced response protein-like protein 2                                                 |
| TCONS_00028841 | -0.135723 | -3.72888   | -1.74101   | BGIOSGA001316 | XP_006649599.1 casein kinase II subunit alpha-like                                                                    |
| TCONS_00011764 | -0.135622 | -1.29605   | 0.851696   | BGIOSGA013616 | XP_006644724.1 basic salivary proline-rich protein 1 isoform X1                                                       |
| TCONS_00004413 | -0.135528 | 1.13963    | 0.143424   | BGIOSGA000809 | XP_006644391.1 beta-adaptin-like protein A                                                                            |
| TCONS_00001396 | -0.135503 | 0.467036   | 0.190164   | BGIOSGA004026 | XP_015695924.1 ABC transporter F family member 4                                                                      |
| TCONS_00000315 | -0.135499 | -0.327833  | 0.393966   | BGIOSGA019275 | XP_006664509.1 chloroplast sensor kinase, chloroplastic                                                               |
| TCONS_00035889 | -0.13533  | 0.17202    | -0.99508   | BGIOSGA037263 | XP_015691630.1 protein QUIRKY-like                                                                                    |
| TCONS_00015227 | -0.13532  | 0.376664   | -0.865031  | BGIOSGA001322 |                                                                                                                       |

transcriptome

|                |           |             |            |               |                                                                                                                   |
|----------------|-----------|-------------|------------|---------------|-------------------------------------------------------------------------------------------------------------------|
| TCONS_00018454 | -0.135271 | 1.85551     | 0.920833   | BGIOSGA009622 | XP_015692858.1 transcription factor bHLH77-like<br>XP_002446838.1probable                                         |
| TCONS_00014650 | -0.135227 | -1.28894    | -1.81263   | BGIOSGA005655 | galacturonosyltransferase-like 3<br>XP_006664752.2 serine/threonine-protein                                       |
| TCONS_00037542 | -0.135142 | 0.755818    | 0.184491   | BGIOSGA010144 | phosphatase BSL2 homolog                                                                                          |
| TCONS_00007381 | -0.135099 | -0.559744   | -1.1576    | BGIOSGA017252 | XP_004951837.1protein IRREGULAR XYLEM 15                                                                          |
| TCONS_00025236 | -0.135098 | -0.62505    | -1.34115   | BGIOSGA030042 | XP_006657785.1PREDICTED: uncharacterized<br>protein LOC102710713                                                  |
| TCONS_00027724 | -0.135062 | -0.386498   | 0.053884   | BGIOSGA027281 | XP_006659267.1 tobamovirus multiplication<br>protein 2A<br>XP_006647916.1 nuclear receptor coactivator 7-<br>like |
| TCONS_00006896 | -0.135058 | 0.206148    | 0.497542   | BGIOSGA021646 | XP_015691629.1 transportin-1                                                                                      |
| TCONS_00015225 | -0.134998 | 0.62433     | 0.485208   | BGIOSGA017411 | XP_006654442.2 probable magnesium<br>transporter NIPA6                                                            |
| TCONS_00019350 | -0.134937 | 0.518054    | 0.479431   | BGIOSGA018827 | XP_006647917.1 DIS3-like exonuclease 2                                                                            |
| TCONS_00008823 | -0.134819 | -0.391904   | -0.616741  | BGIOSGA011841 | XP_006652470.1 LETM1 and EF-hand domain-<br>containing protein 1, mitochondrial-like                              |
| TCONS_00016175 | -0.134807 | -0.802035   | 0.118748   | BGIOSGA006077 | XP_006659933.1 GTP-binding protein ERG                                                                            |
| TCONS_00026117 | -0.134802 | 1.645       | 0.671741   | BGIOSGA028189 | XP_006645646.1 GDT1-like protein 1,<br>chloroplastic                                                              |
| TCONS_00000451 | -0.13462  | 0.165892    | -0.0229009 | BGIOSGA003026 | XP_006660613.1 haloacid dehalogenase-like<br>hydrolase domain-containing protein Sgpp                             |
| TCONS_00030023 | -0.13454  | -0.58642    | -0.798329  | BGIOSGA029783 | XP_003571896.1probable LRR receptor-like<br>serine/threonine-protein kinase At5g45780                             |
| TCONS_00007665 | -0.134458 | -0.717508   | 0.252801   | BGIOSGA021624 | XP_015693857.1PREDICTED: uncharacterized<br>protein LOC102699695                                                  |
| TCONS_00021629 | -0.134434 | 0.143962    | -1.4547    | BGIOSGA018154 | XP_006659134.1 mitogen-activated protein<br>kinase 2                                                              |
| TCONS_00025942 | -0.134291 | -0.631152   | -0.67745   | BGIOSGA021882 | XP_006663035.2 ABC transporter F family<br>member 5-like                                                          |
| TCONS_00033810 | -0.134231 | -0.846554   | -2.25145   | BGIOSGA034056 | XP_004983991.140S ribosomal protein S19                                                                           |
| TCONS_00010335 | -0.134005 | 0.763107    | 0.303384   | BGIOSGA012907 | XP_006661241.2 centromere-associated protein<br>E                                                                 |
| TCONS_00030060 | -0.133995 | -1.88844    | -0.942145  | BGIOSGA029749 | XP_006644588.2 single myb histone 3 isoform<br>X2                                                                 |
| TCONS_00001665 | -0.133989 | -0.309767   | 0.366839   | BGIOSGA035841 | XP_003571252.1putative F-box protein<br>At2g33200                                                                 |
| TCONS_00034837 | -0.133972 | -0.316051   | 0.0847213  | BGIOSGA035236 | XP_015698119.1 DNA repair helicase XPB1-like                                                                      |
| TCONS_00001609 | -0.13395  | 0.254774    | 0.942986   | BGIOSGA004245 | XP_004978786.1F-box/LRR-repeat protein<br>At3g26922                                                               |
| TCONS_00033158 | -0.133905 | -0.0531004  | -0.128848  | BGIOSGA003294 | XP_006661941.2 E3 ubiquitin-protein ligase<br>BRE1-like 2                                                         |
| TCONS_00031644 | -0.133769 | -0.610551   | 0.0868578  | BGIOSGA033459 | XP_015692173.1 crossover junction<br>endonuclease MUS81                                                           |
| TCONS_00002518 | -0.133752 | -0.56144    | 0.0383736  | BGIOSGA005159 | XP_015695433.1PREDICTED: uncharacterized<br>protein LOC102709009                                                  |
| TCONS_00023673 | -0.133703 | 1.66089     | 0.57591    | BGIOSGA029238 | XP_006663111.1 putative disease resistance<br>RPP13-like protein 3 isoform X1                                     |
| TCONS_00038844 | -0.133597 | 0.641393    | -0.206915  | BGIOSGA034010 | XP_006647829.1 sodium-coupled neutral amino<br>acid transporter 1 isoform X2                                      |
| TCONS_00008736 | -0.133552 | -1.50922    | -0.59439   | BGIOSGA022688 | XP_015688112.1 transcription factor GTE4<br>isoform X1                                                            |
| TCONS_00000416 | -0.133379 | 0.295648    | 0.25318    | BGIOSGA014321 | XP_006659234.1 villin-4-like isoform X2                                                                           |
| TCONS_00026185 | -0.133361 | 0.424917    | 0.263433   | BGIOSGA012647 | XP_004961927.1cell division protein FtsZ<br>homolog 2-2, chloroplastic isoform X2                                 |
| TCONS_00019392 | -0.133298 | -1.41001    | -0.162058  | BGIOSGA013217 | XP_006646096.1 protein trichome birefringence-<br>like 3                                                          |
| TCONS_00001355 | -0.133288 | -0.329849   | -0.817434  | BGIOSGA019906 | XP_006648834.1 cell surface glycoprotein 1-like                                                                   |
| TCONS_00008374 | -0.133105 | 1.10891     | 1.48141    | BGIOSGA032439 | XP_006656677.1 proline iminopeptidase                                                                             |
| TCONS_00021673 | -0.133047 | -0.58386    | 0.599708   | BGIOSGA021846 | XP_015688958.1 putative pentatricopeptide<br>repeat-containing protein At1g64310                                  |
| TCONS_00001101 | -0.132978 | -2.3173     | -0.917737  | BGIOSGA003721 | XP_006654531.1 sorting and assembly<br>machinery component 50 homolog A-like                                      |
| TCONS_00019468 | -0.132872 | 0.785377    | 0.988891   | BGIOSGA026596 | XP_006649410.1 inorganic phosphate<br>transporter 1-1                                                             |
| TCONS_00011575 | -0.132817 | 1.11664     | 0.921439   | BGIOSGA011186 | XP_006661346.1 RNA-binding protein cabeza-<br>like                                                                |
| TCONS_00030218 | -0.132727 | 2.00431     | 0.49668    | BGIOSGA026755 | XP_006655873.1PREDICTED: uncharacterized<br>protein LOC102704708 isoform X2                                       |
| TCONS_00021778 | -0.132625 | -4.38434    | -1.37041   | BGIOSGA021744 | XP_013448283.1chromodomain helicase-DNA-<br>binding-like protein                                                  |
| TCONS_00011399 | -0.132573 | -1.73285    | -0.874343  | BGIOSGA011625 | XP_015693325.1 quinone oxidoreductase-like<br>protein 2                                                           |
| TCONS_00017529 | -0.132564 | -0.183861   | 0.931723   | BGIOSGA019599 | NP_001145703.1putative RING zinc finger<br>domain superfamily protein                                             |
| TCONS_00025917 | -0.132396 | -0.826178   | 0.596526   | BGIOSGA037240 | XP_015689993.1 GTPase LSG1-1-like                                                                                 |
| TCONS_00012826 | -0.132309 | 0.404326    | 0.38804    | BGIOSGA018275 | XP_006657402.1 protein LEO1 homolog                                                                               |
| TCONS_00024447 | -0.131991 | -0.477237   | -0.130096  | BGIOSGA009784 | XP_006657369.1PREDICTED: uncharacterized<br>protein LOC102702575 isoform X1                                       |
| TCONS_00022948 | -0.131951 | -0.00885334 | -0.260191  | BGIOSGA020498 | XP_015696547.1PREDICTED: uncharacterized<br>protein LOC102710051                                                  |
| TCONS_00029386 | -0.131888 | -0.11763    | 0.132674   | BGIOSGA020542 | XP_006660555.1 probable NADH kinase                                                                               |
| TCONS_00029877 | -0.131886 | -0.926353   | 0.522513   | BGIOSGA030562 | XP_004973145.1probable LRR receptor-like<br>serine/threonine-protein kinase At2g24230                             |
| TCONS_00027709 | -0.13142  | -0.5119     | 0.0326167  | BGIOSGA030546 | XP_002454995.1homeobox-leucine zipper<br>protein HOX29                                                            |
| TCONS_00003031 | -0.131249 | -0.536568   | -2.17657   | BGIOSGA006838 | XP_006648618.1 probable mediator of RNA<br>polymerase II transcription subunit 26c                                |
| TCONS_00034369 | -0.131105 | -1.13332    | -0.78752   | BGIOSGA026712 | NP_001147411.1plastoquinol-plastocyanin<br>reductase                                                              |
| TCONS_00011023 | -0.130954 | -1.42219    | -1.17982   | BGIOSGA007547 | XP_006664051.1 eukaryotic translation initiation<br>factor 5A-2                                                   |
| TCONS_00036090 | -0.130907 | 0.111226    | 0.786759   | BGIOSGA025428 |                                                                                                                   |

transcriptome

|                |           |            |            |               |                                                                                     |
|----------------|-----------|------------|------------|---------------|-------------------------------------------------------------------------------------|
| TCONS_00025574 | -0.130646 | -0.752101  | -0.794752  | BGIOSGA002240 | XP_015695126.1 glucan endo-1,3-beta-glucosidase 4                                   |
| TCONS_00017736 | -0.130555 | -0.884259  | -0.670208  | BGIOSGA019797 | XP_006655278.2 probable transmembrane GTPase FZO-like, chloroplastic                |
| TCONS_00035677 | -0.13054  | 0.231616   | -0.0577398 | BGIOSGA037096 | XP_022682920.1 uncharacterized protein LOC111257425                                 |
| TCONS_00011896 | -0.130225 | 0.14463    | -0.121852  | BGIOSGA027117 | XP_006649733.1 brefeldin A-inhibited guanine nucleotide-exchange protein 2          |
| TCONS_00014443 | -0.130092 | -0.216465  | -0.215774  | BGIOSGA008529 | XP_004975960.1 plant intracellular Ras-group-related LRR protein 3                  |
| TCONS_00011497 | -0.130083 | 0.102804   | 0.143809   | BGIOSGA011530 | XP_006651002.1 exosome complex exonuclease RRP44 homolog A                          |
| TCONS_00013156 | -0.129913 | 0.00528871 | -0.190571  | BGIOSGA014577 | XP_010230072.1 protein SPIRRIG                                                      |
| TCONS_00036347 | -0.129827 | -0.563449  | 0.22905    | BGIOSGA018027 | XP_015698653.1 PREDICTED: uncharacterized protein LOC102702624 isoform X2           |
| TCONS_00011347 | -0.129449 | -0.367144  | -1.76728   | BGIOSGA029082 | XP_006650906.1 ankyrin repeat domain-containing protein 2A-like isoform X2          |
| TCONS_00014221 | -0.129383 | -0.707562  | -0.479797  | BGIOSGA037029 | XP_006652271.1 putative HVA22-like protein g                                        |
| TCONS_00005793 | -0.129344 | -0.893603  | -0.435682  | BGIOSGA007908 | XP_003572147.1 protein THYLAKOID RHODANASE-LIKE, chloroplastic                      |
| TCONS_00009561 | -0.129337 | -0.0746019 | 0.566007   | BGIOSGA012109 | XP_021313687.1 recQ-mediated genome instability protein 1-like                      |
| TCONS_00006626 | -0.128965 | 0.815435   | 0.638386   | BGIOSGA031351 | XP_014756870.1 probable N6-adenosine-methyltransferase MT-A70-like                  |
| TCONS_00007607 | -0.128913 | 0.383264   | 1.53088    | BGIOSGA013766 | XP_002453535.1 serine/threonine-protein phosphatase PP2A-1 catalytic subunit        |
| TCONS_00028923 | -0.128836 | 0.901744   | -0.197168  | BGIOSGA030501 | XP_006660592.1 nucleobase-ascorbate transporter 6-like                              |
| TCONS_00025793 | -0.128795 | -1.05125   | -0.416931  | BGIOSGA007133 | XP_006659038.2 alcohol dehydrogenase                                                |
| TCONS_00008162 | -0.128645 | -0.0176677 | 0.307794   | BGIOSGA007432 | XP_006647359.1 cytosolic invertase 1                                                |
| TCONS_00001128 | -0.128563 | 0.666155   | 1.0384     | BGIOSGA003752 | XP_015699136.1 chaperone protein dnaJ 49                                            |
| TCONS_00011958 | -0.128473 | 0.645736   | 0.741801   | BGIOSGA011054 | XP_006649797.1 BTB/POZ domain-containing protein At3g09030                          |
| TCONS_00032352 | -0.128238 | -2.771     | 0.806904   | BGIOSGA033298 | XP_006661827.2 ras-related protein RABC2a-like                                      |
| TCONS_00018673 | -0.128174 | -0.181431  | -0.0946822 | BGIOSGA002366 | XP_015698986.1 calponin homology domain-containing protein DDB_G0272472-like        |
| TCONS_00009332 | -0.12808  | -0.0702911 | 0.0280992  | BGIOSGA011876 | XP_021301803.1 uncharacterized protein LOC8063279 isoform X1                        |
| TCONS_00022432 | -0.128065 | -0.165258  | 0.18088    | BGIOSGA021031 | XP_015694156.1 protein split ends                                                   |
| TCONS_00021112 | -0.127981 | -0.146528  | 0.451663   | BGIOSGA023335 | XP_015694289.1 E3 ubiquitin-protein ligase KEG isoform X2                           |
| TCONS_00007275 | -0.127979 | 0.859546   | 0.130333   | BGIOSGA007208 | XP_004952049.13-isopropylmalate dehydratase large subunit, chloroplastic isoform X1 |
| TCONS_00010314 | -0.127911 | 0.119335   | 0.0243662  | BGIOSGA000749 | XP_015689938.1 ninja-family protein Os03g0419100                                    |
| TCONS_00024953 | -0.127896 | 0.249667   | 0.130539   | BGIOSGA024441 | XP_002461868.1 zinc finger protein VAR3, chloroplastic                              |
| TCONS_00005957 | -0.12785  | 0.109329   | -0.483083  | BGIOSGA020262 | XP_006655700.2 cytochrome P450 88A1-like                                            |
| TCONS_00032701 | -0.127548 | -0.22281   | -0.219818  | BGIOSGA031410 | XP_006662599.1 autophagy-related protein 3                                          |
| TCONS_00004299 | -0.127497 | -0.148393  | 0.152343   | #N/A          | #N/A                                                                                |
| TCONS_00019081 | -0.127179 | -1.1536    | -0.423147  | BGIOSGA030138 | XP_015692047.1 phospholipid-transporting ATPase 2-like isoform X3                   |
| TCONS_00028843 | -0.127129 | -0.860694  | -0.434593  | BGIOSGA030595 | XP_010238089.1 isochorismate synthase 1, chloroplastic isoform X2                   |
| TCONS_00005006 | -0.126904 | -0.777822  | 0.113569   | BGIOSGA016316 | XP_003564973.1 probable glucuronosyltransferase Os01g0926600                        |
| TCONS_00035863 | -0.126842 | -0.13767   | -0.0880775 | BGIOSGA037235 | XP_015698265.1 DEXH-box ATP-dependent RNA helicase DEXH9                            |
| TCONS_00013529 | -0.126815 | -1.52711   | -0.559933  | BGIOSGA009453 | XP_006665086.2 probable acyl-activating enzyme 16, chloroplastic                    |
| TCONS_00017198 | -0.126492 | -0.0118237 | -0.0348392 | BGIOSGA012407 | XP_006655022.2 6-phosphofructo-2-kinase/fructose-2,6-bisphosphatase                 |
| TCONS_00002228 | -0.126485 | -1.69251   | -4.00557   | BGIOSGA011043 | XP_006645074.1 fructose-1,6-bisphosphatase, cytosolic                               |
| TCONS_00001917 | -0.126457 | 1.01532    | 0.451545   | BGIOSGA004553 | XP_015690113.1 conserved oligomeric Golgi complex subunit 1                         |
| TCONS_00015984 | -0.12625  | 0.514106   | 0.211125   | BGIOSGA012802 | XP_004975776.1 probable protein phosphatase 2C 40                                   |
| TCONS_00012250 | -0.126128 | 0.404292   | 0.20852    | BGIOSGA026370 | XP_006650067.2 PREDICTED: uncharacterized protein LOC102707566 isoform X1           |
| TCONS_00004938 | -0.126041 | -0.899805  | -1.3464    | BGIOSGA006774 | XP_006646591.1 glycine-rich cell wall structural protein 1.8-like                   |
| TCONS_00028441 | -0.126033 | 0.496744   | 0.355281   | BGIOSGA026523 | XP_006660365.1 probable 26S proteasome non-ATPase regulatory subunit 3              |
| TCONS_00018026 | -0.12602  | 0.19582    | 0.916824   | BGIOSGA000594 | XP_006654557.1 transmembrane protein 56-B-like                                      |
| TCONS_00011901 | -0.125974 | -1.14026   | -1.3433    | BGIOSGA026530 | XP_015690356.1 geraniol 8-hydroxylase-like                                          |
| TCONS_00036734 | -0.125729 | -0.18049   | 0.197019   | BGIOSGA036632 | XP_006663841.1 probable serine/threonine-protein kinase WNK9                        |
| TCONS_00022930 | -0.125722 | -0.788556  | -0.511788  | BGIOSGA020515 | XP_006656503.2 PREDICTED: uncharacterized protein LOC102700347                      |
| TCONS_00028473 | -0.125466 | -2.12921   | -1.36247   | BGIOSGA029235 | XP_015696157.1 serine/arginine repetitive matrix protein 1-like isoform X1          |
| TCONS_00034094 | -0.12539  | 3.25547    | 2.95811    | BGIOSGA003641 | XP_010041882.1 heat shock 70 kDa protein cognate 1-like                             |
| TCONS_00006479 | -0.125377 | 0.385374   | 0.0827186  | BGIOSGA016761 | XP_006648850.1 inositol phosphorylceramide glucuronosyltransferase 1-like           |
| TCONS_00030305 | -0.12528  | 0.406431   | 0.457764   | BGIOSGA022549 | XP_002462611.2 uncharacterized protein LOC8054763                                   |
| TCONS_00008700 | -0.125199 | 0.499506   | 0.128463   | BGIOSGA005730 | XP_006647798.1 clustered mitochondria protein isoform X1                            |
| TCONS_00030058 | -0.125177 | -0.56021   | -0.437186  | BGIOSGA000703 | XP_006660633.1 BTB/POZ domain-containing protein NPY1-like                          |

transcriptome

|                |           |             |            |               |                                                                                                                   |
|----------------|-----------|-------------|------------|---------------|-------------------------------------------------------------------------------------------------------------------|
| TCONS_00001836 | -0.125173 | 0.654124    | 0.95927    | BGIOSGA008536 | XP_006646330.1 GTP-binding protein TypA/BipA homolog isoform X1<br>XP_015698575.1 protein LURP-one-related 8-like |
| TCONS_00034189 | -0.124881 | -0.989695   | -0.547148  | BGIOSGA000190 | XP_006643969.2 protein NLP3                                                                                       |
| TCONS_00000521 | -0.124844 | -0.937308   | -0.617429  | BGIOSGA010052 | XP_006658595.1 WD repeat-containing protein DDB_G0290555                                                          |
| TCONS_00025162 | -0.124839 | 0.0141912   | 0.401346   | BGIOSGA024251 | XP_006663107.1 splicing factor U2af large subunit B isoform X2                                                    |
| TCONS_00034033 | -0.124834 | -0.342417   | -0.238263  | BGIOSGA022090 | XP_006662080.1 chlorophyllide a oxygenase, chloroplastic                                                          |
| TCONS_00032728 | -0.124742 | -1.65633    | -1.6128    | BGIOSGA031379 | XP_015694468.1 oxygen-evolving enhancer protein 2, chloroplastic-like                                             |
| TCONS_00024550 | -0.124528 | -0.438332   | -0.2332    | BGIOSGA024840 | YP_008815755.1NADH-plastoquinone oxidoreductase subunit K (plastid)                                               |
| TCONS_00036853 | -0.124486 | 1.08524     | -0.550569  | BGIOSGA040681 | XP_006657777.1 protein disulfide isomerase-like 5-4                                                               |
| TCONS_00023802 | -0.124403 | 0.314433    | 0.0414745  | BGIOSGA025837 | XP_015696822.1 ETHYLENE INSENSITIVE 3-like 3 protein                                                              |
| TCONS_00030260 | -0.124073 | -0.200919   | 0.246999   | BGIOSGA016530 | XP_006651781.1 calcium-transporting ATPase 3, endoplasmic reticulum-type                                          |
| TCONS_00013116 | -0.124012 | 0.124222    | 0.0669056  | BGIOSGA013360 | XP_006662984.1 protein yippee-like At4g27745                                                                      |
| TCONS_00035040 | -0.123865 | -0.759846   | -0.583328  | BGIOSGA036188 | XP_015693568.1 probable LRR receptor-like serine/threonine-protein kinase At3g47570                               |
| TCONS_00020660 | -0.123851 | -0.16982    | -0.360118  | BGIOSGA033536 |                                                                                                                   |
| TCONS_00031236 | -0.123706 | 0.674571    | 0.352252   | BGIOSGA011451 | XP_010234783.1methyltransferase-like protein 1                                                                    |
| TCONS_00024012 | -0.123553 | -1.19844    | 0.791447   | BGIOSGA011785 | XP_006654944.1 probable glucuronosyltransferase Os05g0123100                                                      |
| TCONS_00031887 | -0.123466 | -0.862763   | -0.353981  | BGIOSGA000124 | XP_002457173.1lecithin-cholesterol acyltransferase-like 1                                                         |
| TCONS_00004495 | -0.123409 | -0.681585   | 0.234325   | BGIOSGA037728 | XP_006644794.1 MATH domain-containing protein At5g43560-like isoform X2                                           |
| TCONS_00016919 | -0.123357 | -1.64614    | -0.613433  | BGIOSGA014043 | XP_006653063.1PREDICTED: uncharacterized protein LOC102705811 isoform X1                                          |
| TCONS_00015489 | -0.123252 | -0.114336   | -2.96043   | BGIOSGA017108 | XP_006652134.1 probable cinnamyl alcohol dehydrogenase 6                                                          |
| TCONS_00033512 | -0.123124 | 0.160999    | 0.429216   | BGIOSGA035306 | XP_006663466.1 zinc finger protein 511                                                                            |
| TCONS_00015079 | -0.122788 | -1.46244    | -1.45439   | BGIOSGA019120 | XP_015691689.1 endonuclease 2-like<br>XP_006645528.1 Golgi to ER traffic protein 4 homolog                        |
| TCONS_00000266 | -0.122671 | -0.240414   | -0.283468  | BGIOSGA002847 |                                                                                                                   |
| TCONS_00011635 | -0.122632 | -0.190618   | 0.350271   | BGIOSGA021438 | XP_014752695.1O-fucosyltransferase 3                                                                              |
| TCONS_00034596 | -0.122618 | -0.949087   | -0.173544  | BGIOSGA002391 | XP_015697829.1 putative disease resistance protein RGA4                                                           |
| TCONS_00013499 | -0.122566 | 0.519056    | 0.0601703  | BGIOSGA009485 | XP_006650873.1 E3 ubiquitin-protein ligase RNF170-like                                                            |
| TCONS_00010077 | -0.1225   | 0.187283    | -0.253699  | BGIOSGA022638 | XP_015690894.1 DNA helicase INO80                                                                                 |
| TCONS_00025595 | -0.122386 | -0.688741   | -0.296776  | BGIOSGA012702 | XP_006658023.1 pyrrolidone-carboxylate peptidase                                                                  |
| TCONS_00024225 | -0.122252 | -0.22687    | 0.728279   | BGIOSGA029161 | XP_006658049.1 DEAD-box ATP-dependent RNA helicase 57                                                             |
| TCONS_00010846 | -0.122161 | 0.16225     | -0.208032  | BGIOSGA019093 | XP_015698585.1 E3 SUMO-protein ligase SIZ2-like                                                                   |
| TCONS_00007032 | -0.122134 | 1.213       | 0.735971   | BGIOSGA019817 | XP_015688758.1PREDICTED: uncharacterized protein LOC102708695                                                     |
| TCONS_00010225 | -0.122087 | -0.375673   | -0.300342  | BGIOSGA012790 | XP_004984152.1uric acid degradation bifunctional protein TTL                                                      |
| TCONS_00008886 | -0.122042 | 0.429568    | 0.140863   | BGIOSGA005524 | XP_006647978.1PREDICTED: uncharacterized protein LOC102703462 isoform X3                                          |
| TCONS_00005882 | -0.121932 | -0.0425089  | -1.65983   | BGIOSGA024887 | XP_004986219.1L-type lectin-domain containing receptor kinase IV.1                                                |
| TCONS_00037348 | -0.121866 | 0.504742    | -0.0689584 | BGIOSGA019053 | XP_006664096.1 transmembrane protein 205-like                                                                     |
| TCONS_00013155 | -0.121848 | -0.386226   | -0.581201  | BGIOSGA014083 | XP_003559774.1stem-specific protein TSJT1                                                                         |
| TCONS_00029555 | -0.121765 | -0.512884   | 0.0287321  | BGIOSGA005351 | XP_006661579.2 P-loop NTPase domain-containing protein LPA1 homolog                                               |
| TCONS_00006706 | -0.12174  | -0.779203   | 0.0802173  | BGIOSGA017049 | XP_015688982.1 cell division cycle 20.2, cofactor of APC complex-like                                             |
| TCONS_00031739 | -0.121399 | -0.835028   | -0.336535  | BGIOSGA010923 | XP_015697361.1 barley B recombinant-like protein A                                                                |
| TCONS_00018264 | -0.121117 | 0.684098    | -1.1854    | BGIOSGA014196 | XP_020395231.1LEAF RUST 10 DISEASE-RESISTANCE LOCUS RECEPTOR-LIKE PROTEIN KINASE-like 1.2                         |
| TCONS_00000187 | -0.121037 | -0.938071   | 0.618389   | BGIOSGA010055 | XP_006643748.1 glucose-induced degradation protein 4 homolog isoform X1                                           |
| TCONS_00001644 | -0.121004 | -0.454369   | -0.135345  | BGIOSGA004278 | XP_006644575.1PREDICTED: uncharacterized protein LOC102700283 isoform X1                                          |
| TCONS_00017664 | -0.121003 | -3.39738    | -3.98485   | #N/A          | #N/A                                                                                                              |
| TCONS_00016796 | -0.120997 | 0.48325     | 0.154157   | BGIOSGA014171 | XP_006653845.1 serine/arginine repetitive matrix protein 2                                                        |
| TCONS_00036936 | -0.120854 | -0.304206   | -0.633668  | BGIOSGA040203 | YP_005090186.1ribulose-1,5-bisphosphate carboxylase/oxygenase large subunit (chloroplast)                         |
| TCONS_00016817 | -0.120643 | -0.758853   | -0.295791  | BGIOSGA019067 | XP_006652979.2 kinesin-like calmodulin-binding protein homolog                                                    |
| TCONS_00020357 | -0.120492 | -0.796944   | -1.58441   | BGIOSGA023024 | XP_004964885.12-hydroxyisoflavanone dehydratase                                                                   |
| TCONS_00024254 | -0.12048  | 2.00148     | 1.54096    | BGIOSGA037243 | XP_015695168.1 protein HUA2-LIKE 2-like                                                                           |
| TCONS_00014391 | -0.120437 | -2.27553    | -1.06592   | BGIOSGA014332 | XP_015691663.1 NAC domain-containing protein 92-like                                                              |
| TCONS_00033665 | -0.120314 | -0.938787   | 0.183333   | #N/A          | #N/A                                                                                                              |
| TCONS_00024038 | -0.120265 | -0.434596   | -0.0818307 | BGIOSGA026076 | XP_015695434.1 DNA annealing helicase and endonuclease ZRANB3                                                     |
| TCONS_00000461 | -0.120013 | -0.00439638 | -0.276059  | BGIOSGA026210 | XP_006643930.2 SMR domain-containing protein At5g58720-like                                                       |
| TCONS_00020615 | -0.11987  | -0.175576   | 0.434147   | BGIOSGA022799 | XP_006656040.1 CDK5RAP3-like protein                                                                              |

## transcriptome

|                |           |            |            |               |                                                                                                                    |
|----------------|-----------|------------|------------|---------------|--------------------------------------------------------------------------------------------------------------------|
| TCONS_00017977 | -0.119808 | 0.200405   | 1.0999     | BGIOSGA022398 | XP_015692630.1PREDICTED: uncharacterized protein LOC102717994<br>XP_015695736.1 lipid phosphate phosphatase 2-like |
| TCONS_00027889 | -0.11963  | -0.724422  | 0.263328   | BGIOSGA002737 | XP_024310935.1ethylene-responsive transcription factor ERF118                                                      |
| TCONS_00029796 | -0.119473 | -0.12216   | 0.0349043  | BGIOSGA030019 | XP_006653121.2 receptor-like protein 2                                                                             |
| TCONS_00013646 | -0.119308 | -0.25903   | -0.416648  | BGIOSGA015686 | XP_006653003.1 probable adenylyate kinase 6, chloroplastic                                                         |
| TCONS_00016841 | -0.119275 | -0.208604  | -0.126345  | BGIOSGA011771 | XP_014661017.1L-type lectin-domain containing receptor kinase IV.1                                                 |
| TCONS_00014653 | -0.119152 | -0.700289  | -0.763464  | BGIOSGA008015 | XP_015692627.1 selT-like protein                                                                                   |
| TCONS_00017959 | -0.118808 | 0.168474   | 0.655374   | BGIOSGA000548 | XP_015698339.1PREDICTED: uncharacterized protein LOC102719168, partial                                             |
| TCONS_00036314 | -0.118678 | -0.0743595 | 0.468801   | BGIOSGA013103 | XP_006657620.1 B-cell receptor-associated protein 31-like                                                          |
| TCONS_00024929 | -0.118618 | -1.22398   | -0.866075  | BGIOSGA009442 | XP_006663009.1 TBC1 domain family member 15-like                                                                   |
| TCONS_00035106 | -0.118512 | -0.336292  | 0.217937   | BGIOSGA005758 | XP_021318722.1proteinaceous RNase P 1, chloroplastic/mitochondrial isoform X5                                      |
| TCONS_00015231 | -0.118321 | 1.35475    | 0.182496   | BGIOSGA017417 | XP_015697132.1PREDICTED: uncharacterized protein LOC102707437 isoform X3                                           |
| TCONS_00014666 | -0.118271 | 0.0584802  | 0.159254   | BGIOSGA018900 | XP_006663966.1 CCAAT/enhancer-binding protein zeta                                                                 |
| TCONS_00028543 | -0.11819  | 0.376707   | 0.534509   | BGIOSGA030289 | XP_006650920.1 exosome complex exonuclease RRP46 homolog                                                           |
| TCONS_00013561 | -0.118058 | 0.365521   | -0.0269651 | BGIOSGA009414 | XP_015695425.1 uncharacterized hydrolase YugF-like                                                                 |
| TCONS_00025493 | -0.11792  | -0.602629  | -0.93035   | BGIOSGA023942 | XP_006659645.2 biotin synthase                                                                                     |
| TCONS_00027034 | -0.117898 | -0.162876  | -0.147477  | BGIOSGA015425 | XP_006654462.1 tubby-like F-box protein 8                                                                          |
| TCONS_00019367 | -0.117761 | 0.842742   | 0.671378   | BGIOSGA017392 | XP_006652633.1 mitogen-activated protein kinase kinase kinase YODA-like                                            |
| TCONS_00016409 | -0.117693 | 0.879761   | -0.0519696 | BGIOSGA005883 | XP_006658208.2 DBB1- and CUL4-associated factor 4                                                                  |
| TCONS_00022984 | -0.117581 | -0.292736  | 0.134683   | BGIOSGA025015 | XP_002451556.1putative adagio-like protein 2                                                                       |
| TCONS_00005444 | -0.117544 | 0.713031   | -0.467615  | BGIOSGA020618 | XP_006647220.1 protein MEI2-like 5                                                                                 |
| TCONS_00005936 | -0.117493 | 0.217581   | 0.291114   | BGIOSGA018983 | XP_015691250.1 nuclear transcription factor Y subunit A-3-like                                                     |
| TCONS_00010289 | -0.117285 | -1.14623   | -0.831695  | BGIOSGA023919 | XP_015696143.1 polyadenylate-binding protein RBP45-like                                                            |
| TCONS_00027485 | -0.117128 | -0.811309  | -0.0772836 | BGIOSGA016505 | XP_015695099.1 UPF0483 protein CG5412-like                                                                         |
| TCONS_00025732 | -0.117082 | -0.423942  | 0.266011   | BGIOSGA013543 | XP_015689133.1 myb family transcription factor APL                                                                 |
| TCONS_00007432 | -0.117064 | -0.402265  | -0.187424  | BGIOSGA021804 | XP_015694239.1PREDICTED: uncharacterized protein LOC102706205 isoform X2                                           |
| TCONS_00022746 | -0.116934 | 1.00529    | -0.0163605 | BGIOSGA020711 | XP_006652644.1 protein LAZ1-like                                                                                   |
| TCONS_00016420 | -0.116746 | -0.540041  | -0.445517  | BGIOSGA005866 | XP_015689491.1 eukaryotic translation initiation factor isoform 4G-2-like                                          |
| TCONS_00008364 | -0.11661  | 0.123865   | 1.08999    | BGIOSGA006061 | XP_006661747.1 general transcription factor IIE subunit 2                                                          |
| TCONS_00032159 | -0.116572 | -0.675795  | -0.264524  | BGIOSGA011968 | XP_023157350.1F-box/FBD/LRR-repeat protein At1g13570-like isoform X1                                               |
| TCONS_00035000 | -0.116571 | -1.19731   | -0.486509  | BGIOSGA035394 | XP_006646771.2 GDSL esterase/lipase At5g45950-like                                                                 |
| TCONS_00007220 | -0.116479 | -0.895115  | -1.03251   | BGIOSGA031848 | XP_015692595.1 pyruvate, phosphate dikinase 1, chloroplastic                                                       |
| TCONS_00019273 | -0.116317 | 0.411788   | -1.3202    | BGIOSGA018078 | XP_015698376.1 glycine-rich RNA-binding protein GRP1A-like                                                         |
| TCONS_00037581 | -0.116227 | 1.26123    | 2.71747    | BGIOSGA019389 | XP_003579954.2uncharacterized protein LOC100838142                                                                 |
| TCONS_00016078 | -0.116128 | 1.04786    | 1.48754    | BGIOSGA014902 | XP_006660874.1 GTPase-activating protein gyp7-like                                                                 |
| TCONS_00030405 | -0.116012 | -0.373501  | -0.0799784 | BGIOSGA029115 | XP_006660619.1 pentatricopeptide repeat-containing protein At2g36730                                               |
| TCONS_00028988 | -0.115938 | -0.0477968 | 0.844848   | BGIOSGA021201 | XP_004969045.1light-harvesting complex-like protein OHP2, chloroplastic                                            |
| TCONS_00001246 | -0.115767 | -0.496382  | -1.37314   | BGIOSGA029125 | XP_015696903.1PREDICTED: uncharacterized protein LOC102702975 isoform X1                                           |
| TCONS_00031229 | -0.115723 | 0.0852958  | 0.817027   | BGIOSGA033047 | XP_006656066.2 acyl-coenzyme A oxidase 3, peroxisomal-like                                                         |
| TCONS_00022218 | -0.115438 | 0.1544     | -0.0974398 | BGIOSGA021279 | XP_006655015.1 GDSL esterase/lipase At1g09390-like                                                                 |
| TCONS_00018666 | -0.115326 | -3.6675    | -1.19177   | BGIOSGA018768 | XP_006658054.1 serine/threonine-protein kinase AFC1-like                                                           |
| TCONS_00004689 | -0.115317 | -0.662249  | -0.411236  | BGIOSGA003876 | XP_015693456.1 protein-tyrosine sulfotransferase                                                                   |
| TCONS_00020159 | -0.115014 | -0.410462  | 0.378618   | BGIOSGA022356 | XP_006662750.1 exocyst complex component EXO70A1-like                                                              |
| TCONS_00034340 | -0.114913 | 0.262117   | -0.94618   | BGIOSGA014056 | NP_001149760.1syntxin 32                                                                                           |
| TCONS_00000314 | -0.11489  | 0.282271   | 0.0348277  | BGIOSGA002888 | XP_006645319.2 DNA repair protein recA homolog 2, mitochondrial                                                    |
| TCONS_00005079 | -0.114868 | 0.0204008  | 0.0967797  | BGIOSGA014071 | XP_006659446.2 probable CCR4-associated factor 1 homolog 7                                                         |
| TCONS_00026674 | -0.114865 | -0.0487151 | 1.55855    | BGIOSGA009832 | NP_001148222.1ubiquitin-conjugating enzyme E2-17 kDa                                                               |
| TCONS_00016821 | -0.114836 | 0.114282   | 1.05827    | BGIOSGA030459 | XP_006646907.1 CBL-interacting protein kinase 26                                                                   |
| TCONS_00007389 | -0.114788 | -0.260361  | -0.0211147 | BGIOSGA035923 | XP_006645677.1 transcription factor bHLH68-like isoform X2                                                         |
| TCONS_00003148 | -0.114775 | 0.381599   | -1.51698   | BGIOSGA007727 | XP_006658575.1 pentatricopeptide repeat-containing protein At4g17616                                               |
| TCONS_00025130 | -0.114705 | 0.365692   | -0.705684  | BGIOSGA024275 | XP_020399314.1heat shock protein binding protein isoform X1                                                        |
| TCONS_00026412 | -0.114514 | 0.703198   | -0.360091  | BGIOSGA030776 | XP_006655420.1 KH domain-containing protein SPIN1-like                                                             |
| TCONS_00019507 | -0.1145   | -0.0597337 | 0.623299   | BGIOSGA013816 |                                                                                                                    |



transcriptome

|                |           |            |            |               |                                                                                           |
|----------------|-----------|------------|------------|---------------|-------------------------------------------------------------------------------------------|
| TCONS_00031714 | -0.114483 | 0.226925   | 0.146293   | BGIOSGA014539 | XP_006661595.1PREDICTED: uncharacterized protein LOC102707710 isoform X1                  |
| TCONS_00017341 | -0.11443  | -2.82063   | -3.43577   | BGIOSGA004403 | XP_010911738.2 BURP domain-containing protein 6-like                                      |
| TCONS_00011369 | -0.11431  | 0.086854   | 1.76879    | BGIOSGA013984 | XP_015690040.1 ribosome-binding factor PSRP1, chloroplastic                               |
| TCONS_00013425 | -0.114167 | -0.484556  | -0.523758  | BGIOSGA032090 | XP_006654522.1 40S ribosomal protein S23                                                  |
| TCONS_00031609 | -0.114018 | -0.0860405 | -0.491347  | BGIOSGA028008 | XP_015697073.1 oxysterol-binding protein-related protein 1B-like                          |
| TCONS_00029053 | -0.114003 | 0.745944   | 0.264443   | BGIOSGA030801 | XP_006660647.1PREDICTED: uncharacterized protein LOC102720455 isoform X1                  |
| TCONS_00035738 | -0.113995 | -0.305912  | 0.435782   | BGIOSGA033263 | XP_006644633.1PREDICTED: uncharacterized protein At4g10930-like isoform X1                |
| TCONS_00019138 | -0.113957 | -0.262287  | 0.793109   | BGIOSGA010985 | XP_004962350.1lysophospholipid acyltransferase LPEAT1 isoform X2                          |
| TCONS_00036360 | -0.113668 | -0.157138  | -0.0655406 | BGIOSGA006666 | XP_004963077.1calcineurin B-like protein 2                                                |
| TCONS_00031191 | -0.113579 | 0.278096   | -0.902108  | BGIOSGA021860 | XP_006662378.2 soluble starch synthase 2-1, chloroplastic/amyloplastic isoform X2         |
| TCONS_00021271 | -0.113433 | -0.319393  | 0.166075   | BGIOSGA023497 | XP_015693687.1 cell wall integrity protein scw1                                           |
| TCONS_00027393 | -0.113343 | -1.40087   | -1.3098    | BGIOSGA011002 | XP_002445102.1probable mixed-linked glucan synthase 6                                     |
| TCONS_00036836 | -0.113159 | 0.233284   | -0.19075   | BGIOSGA019707 | XP_006663901.2PREDICTED: uncharacterized protein LOC102704378                             |
| TCONS_00023574 | -0.11308  | 0.208555   | -0.160628  | BGIOSGA037714 | XP_015695183.1PREDICTED: uncharacterized protein LOC102718006                             |
| TCONS_00024128 | -0.112903 | -0.617447  | 0.0728361  | BGIOSGA006276 | XP_015694731.1 serine/threonine-protein kinase SAPK2                                      |
| TCONS_00002593 | -0.112886 | -1.77981   | -1.58694   | BGIOSGA023924 | XP_006645351.1 abscisic stress-ripening protein 2-like                                    |
| TCONS_00000164 | -0.112881 | -0.500661  | -1.68329   | BGIOSGA001801 | XP_006643729.1PREDICTED: uncharacterized protein LOC102708932 isoform X2                  |
| TCONS_00017854 | -0.112592 | 0.090312   | -0.050147  | BGIOSGA038889 | YP_002000495.1ribulose-1,5-bisphosphate carboxylase/oxygenase large subunit (chloroplast) |
| TCONS_00010247 | -0.112502 | 0.320486   | -0.41879   | BGIOSGA012810 | XP_006650170.1 pre-mRNA-processing factor 17                                              |
| TCONS_00037751 | -0.112257 | -0.27028   | 1.6465     | BGIOSGA039198 | XP_017696574.1 DNA-directed RNA polymerase III subunit RPC4-like                          |
| TCONS_00010494 | -0.112227 | -0.511342  | -0.598004  | BGIOSGA013103 | XP_006650280.1PREDICTED: uncharacterized protein LOC102722752, partial                    |
| TCONS_00020824 | -0.112226 | 0.629635   | 0.0424143  | BGIOSGA022570 | XP_006657017.1 uncharacterized membrane protein YuiD                                      |
| TCONS_00000882 | -0.112085 | 0.0612691  | -0.136226  | BGIOSGA007466 | XP_006644156.1 glyoxysomal fatty acid beta-oxidation multifunctional protein MFP-a-like   |
| TCONS_00016999 | -0.112028 | -0.451136  | -1.24195   | BGIOSGA029236 | XP_003569001.1ACT domain-containing protein ACR9 isoform X2                               |
| TCONS_00018509 | -0.112002 | 0.162982   | 0.431241   | BGIOSGA018925 | XP_006653983.2PREDICTED: uncharacterized protein LOC102721549                             |
| TCONS_00006207 | -0.111802 | 0.743179   | 0.598854   | BGIOSGA008370 | XP_024317515.1uncharacterized protein LOC100843176                                        |
| TCONS_00031895 | -0.111772 | 0.971396   | 0.386725   | BGIOSGA029874 | XP_006661656.1 enolase                                                                    |
| TCONS_00009934 | -0.111575 | 0.830561   | 0.673502   | BGIOSGA012484 | XP_006651318.1PREDICTED: uncharacterized protein LOC102704504                             |
| TCONS_00020486 | -0.111466 | 0.131055   | 0.754042   | BGIOSGA015293 | XP_006655985.1 ubiquitin receptor RAD23d-like                                             |
| TCONS_00001061 | -0.111436 | 1.09479    | 1.20062    | BGIOSGA003677 | XP_010231885.1FK506-binding protein 3 isoform X2                                          |
| TCONS_00013393 | -0.110949 | -1.04946   | -0.315002  | BGIOSGA024615 | XP_010228007.1nudix hydrolase 16, mitochondrial                                           |
| TCONS_00034626 | -0.110891 | 0.174906   | 0.744735   | BGIOSGA008596 | XP_006663345.2 acetolactate synthase small subunit 2, chloroplastic-like                  |
| TCONS_00001070 | -0.110872 | 0.233775   | 0.382117   | BGIOSGA025051 | XP_015691873.1PREDICTED: uncharacterized protein LOC102699681                             |
| TCONS_00002661 | -0.110828 | -0.0797672 | 0.415809   | BGIOSGA011993 | XP_006643638.1 C-type lectin receptor-like tyrosine-protein kinase At1g52310 isoform X1   |
| TCONS_00029793 | -0.110538 | -1.30058   | -0.249811  | BGIOSGA004250 | XP_015696801.1 lipid phosphate phosphatase 2-like                                         |
| TCONS_00036899 | -0.110364 | -0.0976459 | 0.994105   | BGIOSGA025439 | NP_001150181.1membrane steroid-binding protein 1                                          |
| TCONS_00000929 | -0.110232 | 0.0169773  | -0.327282  | BGIOSGA005043 | XP_022682619.1probable serine/threonine-protein kinase At1g54610 isoform X2               |
| TCONS_00007556 | -0.110056 | -1.27161   | -0.508195  | BGIOSGA006928 | XP_006647042.2PREDICTED: uncharacterized protein LOC102708405                             |
| TCONS_00000763 | -0.110056 | 0.557769   | 0.841803   | BGIOSGA036953 | XP_008655848.1E3 ubiquitin-protein ligase EL5                                             |
| TCONS_00023086 | -0.109971 | 0.168855   | 0.0618537  | BGIOSGA025118 | XP_012699449.1GIGYF family protein CG11148                                                |
| TCONS_00024606 | -0.109852 | -0.541185  | 0.102515   | BGIOSGA016456 | XP_006657465.1 outer envelope protein 61                                                  |
| TCONS_00009757 | -0.10963  | 0.301974   | 0.453716   | BGIOSGA014455 | XP_006649829.1 AT-hook motif nuclear-localized protein 22                                 |
| TCONS_00008165 | -0.109561 | 0.320077   | 0.601275   | BGIOSGA006275 | XP_004952835.1nascent polypeptide-associated complex subunit alpha, muscle-specific form  |
| TCONS_00013572 | -0.109464 | 0.281489   | 0.263296   | BGIOSGA009403 | XP_006650931.1 protein EXPORTIN 1A-like                                                   |
| TCONS_00009057 | -0.109408 | 0.202512   | -0.168849  | BGIOSGA001699 | XP_006648131.1 serine/threonine-protein phosphatase PP1                                   |
| TCONS_00019957 | -0.109313 | 0.178188   | -0.0842255 | BGIOSGA022098 | XP_006655685.1PREDICTED: uncharacterized protein LOC102721280                             |
| TCONS_00031399 | -0.109276 | -1.51795   | -1.40131   | BGIOSGA014789 | XP_006654334.1 AB hydrolase superfamily protein YfhM-like                                 |
| TCONS_00014927 | -0.109124 | 0.103647   | -0.162742  | BGIOSGA030915 | XP_006652816.1 peroxisomal 2,4-dienoyl-CoA reductase                                      |
| TCONS_00035888 | -0.108937 | -1.03746   | -1.53821   | BGIOSGA007558 | XP_006663954.1 ribulose bisphosphate carboxylase small chain, chloroplastic-like          |
| TCONS_00015810 | -0.108902 | -0.562886  | 0.134691   | BGIOSGA015176 | XP_015692242.1 WASH complex subunit strumpellin homolog isoform X1                        |
| TCONS_00011839 | -0.108882 | 0.140651   | -0.127569  | BGIOSGA006318 | XP_002468223.1protein SHORT HYPOCOTYL IN WHITE LIGHT 1                                    |

## transcriptome

|                |           |            |            |               |                                                                                                |
|----------------|-----------|------------|------------|---------------|------------------------------------------------------------------------------------------------|
| TCONS_00017957 | -0.108793 | -0.0679729 | -0.130321  | BGIOSGA022922 | XP_010504143.1 histone H4                                                                      |
| TCONS_00023349 | -0.108755 | 0.455934   | -0.739992  | BGIOSGA003804 | XP_004955807.1 chloroplast stem-loop binding protein of 41 kDa a, chloroplastic                |
| TCONS_00024885 | -0.108746 | -1.40202   | -0.0508759 | BGIOSGA001906 | XP_015696506.1 protein argonate 16                                                             |
| TCONS_00004439 | -0.108651 | 0.211625   | 0.0140733  | BGIOSGA000784 | XP_006644741.1 PREDICTED: uncharacterized protein LOC102702332                                 |
| TCONS_00005849 | -0.108332 | -0.667419  | -0.0264115 | BGIOSGA021625 | XP_006647169.1 probable LRR receptor-like serine/threonine-protein kinase At5g10290            |
| TCONS_00009931 | -0.108263 | -0.750387  | -0.647395  | BGIOSGA017432 | XP_006647285.1 DNA repair protein RAD50 isoform X1                                             |
| TCONS_00020554 | -0.108213 | 0.336213   | -0.036146  | BGIOSGA028724 | XP_006656007.2 U-box domain-containing protein 35                                              |
| TCONS_00006216 | -0.108155 | -0.989223  | -0.92631   | BGIOSGA034845 | XP_006647351.2 digalactosyldiacylglycerol synthase 1, chloroplastic-like                       |
| TCONS_00006468 | -0.108106 | -0.634359  | -0.510528  | BGIOSGA015013 | NP_001148658.2 enzyme of the cupin superfamily                                                 |
| TCONS_00016780 | -0.108096 | 0.00205368 | -0.100704  | BGIOSGA014185 | XP_015691674.1 ribulose biphosphate carboxylase/oxygenase activase, chloroplastic              |
| TCONS_00013559 | -0.107865 | 0.902502   | 1.12027    | BGIOSGA003043 | XP_006650919.1 protein BCCIP homolog                                                           |
| TCONS_00005228 | -0.10782  | 1.07341    | 0.333724   | BGIOSGA037972 | XP_004951200.1 uncharacterized protein LOC101766807                                            |
| TCONS_00019378 | -0.107818 | 0.702602   | 0.144404   | BGIOSGA017970 | XP_015692870.1 histone deacetylase 8-like                                                      |
| TCONS_00016945 | -0.107789 | 0.624629   | 0.148582   | BGIOSGA018997 | XP_023157534.1 zinc finger BED domain-containing protein RICESLEEPER 2-like                    |
| TCONS_00016890 | -0.107786 | 0.167224   | 0.158833   | BGIOSGA014072 | XP_006653039.1 acyl-CoA-binding domain-containing protein 1-like                               |
| TCONS_00014455 | -0.107688 | -0.979125  | 0.17675    | BGIOSGA016617 | NP_001132121.1 uncharacterized LOC100193538 precursor                                          |
| TCONS_00020991 | -0.107654 | 1.11595    | 0.804673   | BGIOSGA015386 | XP_003563668.1 beta-glucuronosyltransferase GlcAT14A                                           |
| TCONS_00012117 | -0.107563 | 0.462969   | 1.64498    | BGIOSGA029291 | XP_006649956.1 acetate/butyrate--CoA ligase AAE7, peroxisomal                                  |
| TCONS_00015161 | -0.107531 | 0.0298246  | -0.199306  | BGIOSGA017341 | XP_006653022.1 saccin                                                                          |
| TCONS_00027725 | -0.107405 | 1.49635    | 0.453672   | BGIOSGA028024 | XP_006659267.1 tobamovirus multiplication protein 2A                                           |
| TCONS_00025037 | -0.106992 | -0.25084   | 0.36901    | BGIOSGA024369 | XP_015695431.1 tetra-ricopeptide repeat protein 27 homolog                                     |
| TCONS_00006201 | -0.106953 | 1.26705    | -0.107915  | BGIOSGA030373 | XP_006647344.1 beta-fructofuranosidase, insoluble isoenzyme 1                                  |
| TCONS_00015248 | -0.106904 | -0.021617  | -0.603467  | BGIOSGA015734 | XP_015691347.1 UMP-CMP kinase 2-like                                                           |
| TCONS_00012365 | -0.106855 | -0.257396  | 0.358224   | BGIOSGA026180 | XP_015690991.1 fibrous sheath CABYR-binding protein-like isoform X1                            |
| TCONS_00021430 | -0.106701 | -0.955599  | -0.635969  | BGIOSGA009320 | XP_004966574.1 signal peptide peptidase-like 5                                                 |
| TCONS_00034128 | -0.106593 | 1.81214    | -1.67065   | BGIOSGA036792 | XP_006662652.1 ferritin-1, chloroplastic-like                                                  |
| TCONS_00032484 | -0.106531 | 0.326588   | -0.242109  | BGIOSGA001307 | XP_008673420.1 glycosyltransferase isoform X1                                                  |
| TCONS_00021043 | -0.106391 | 0.0919473  | 0.00216817 | BGIOSGA023274 | XP_006657140.1 PREDICTED: uncharacterized protein LOC102722226 isoform X2                      |
| TCONS_00007012 | -0.106378 | -0.869738  | -0.212785  | BGIOSGA030637 | XP_015689589.1 nudix hydrolase 3 isoform X1                                                    |
| TCONS_00002418 | -0.106247 | 0.359731   | 0.0250025  | BGIOSGA005060 | XP_003564936.1 E3 ubiquitin-protein ligase complex slx8-rfp subunit slx8                       |
| TCONS_00006941 | -0.106161 | -2.9585    | #N/A       | #N/A          | #N/A                                                                                           |
| TCONS_00004996 | -0.106074 | -1.15204   | -0.19798   | BGIOSGA029470 | XP_006660046.2 60S ribosomal protein L7a                                                       |
| TCONS_00032334 | -0.106048 | 1.232      | 0.551715   | BGIOSGA004325 | XP_015698373.1 KRR1 small subunit processome component homolog                                 |
| TCONS_00007009 | -0.105966 | 0.637708   | -0.821207  | BGIOSGA026618 | XP_003570283.1 protein TIC 55, chloroplastic                                                   |
| TCONS_00008302 | -0.10561  | -2.26139   | -0.616008  | BGIOSGA006126 | XP_006647453.2 rhodanese-like domain-containing protein 11, chloroplastic                      |
| TCONS_00000345 | -0.105553 | 0.92177    | 0.232035   | BGIOSGA015509 | XP_004968473.1 uncharacterized protein LOC101780552                                            |
| TCONS_00029628 | -0.105385 | -1.6281    | -1.23503   | BGIOSGA020956 | XP_006664888.1 DNA-binding protein SMUBP-2-like                                                |
| TCONS_00023167 | -0.105361 | -0.278821  | -0.288415  | #N/A          | #N/A                                                                                           |
| TCONS_00037538 | -0.105273 | 1.8531     | -0.195526  | BGIOSGA031399 | XP_015698578.1 PREDICTED: uncharacterized protein LOC102703263                                 |
| TCONS_00013391 | -0.105229 | -1.41917   | 0.360091   | BGIOSGA009593 | XP_006651942.2 PREDICTED: uncharacterized protein LOC102707020, partial                        |
| TCONS_00017043 | -0.105131 | -3.16702   | -0.681662  | BGIOSGA014196 | XP_004960359.1 L-type lectin-domain containing receptor kinase VIII.2                          |
| TCONS_00008642 | -0.104778 | -2.18692   | -1.27864   | BGIOSGA016768 | XP_015688380.1 V-type proton ATPase subunit G1-like isoform X2                                 |
| TCONS_00024261 | -0.104624 | -1.1325    | 0.162192   | BGIOSGA014893 | XP_015695101.1 beta-glucosidase 26                                                             |
| TCONS_00016413 | -0.104574 | -1.6586    | -1.35239   | BGIOSGA037790 | XP_015691539.1 calcium-dependent protein kinase 29-like                                        |
| TCONS_00017231 | -0.104497 | -0.842874  | -0.308805  | BGIOSGA021947 | XP_006654103.1 pre-mRNA-splicing factor 38B-like isoform X1                                    |
| TCONS_00003925 | -0.104376 | -1.6951    | -0.553908  | BGIOSGA007821 | XP_006646071.1 inorganic pyrophosphatase 3-like                                                |
| TCONS_00019726 | -0.104317 | -0.474489  | 0.0376589  | BGIOSGA017636 | XP_021315696.1 uncharacterized protein LOC110434946 isoform X3                                 |
| TCONS_00037315 | -0.104307 | 0.304809   | 0.0936179  | BGIOSGA035053 | XP_006664614.1 5'-adenylylsulfate reductase-like 6                                             |
| TCONS_00029479 | -0.104155 | 0.788693   | 0.72313    | BGIOSGA031233 | XP_021308931.1 nicotinate-nucleotide pyrophosphorylase [carboxylating], chloroplastic          |
| TCONS_00004312 | -0.104036 | 1.3753     | 0.358424   | BGIOSGA006837 | XP_006656160.1 40S ribosomal protein S24-1-like                                                |
| TCONS_00017426 | -0.103918 | -1.07081   | -0.671147  | BGIOSGA038406 | XP_006654185.2 probable LRR receptor-like serine/threonine-protein kinase At1g56140 isoform X1 |
| TCONS_00017531 | -0.103851 | -0.401903  | 0.214539   | BGIOSGA019602 | XP_006655191.1 PREDICTED: uncharacterized protein LOC102719116                                 |
| TCONS_00018203 | -0.103687 | 0.595427   | 0.592354   | BGIOSGA001317 | XP_00665528.1 mitochondrial outer membrane protein porin 2                                     |
| TCONS_00006921 | -0.103603 | -1.89743   | -0.259753  | BGIOSGA025264 | XP_015693577.1 AP2/ERF and B3 domain-containing protein Os01g0141000-like                      |

transcriptome

|                |            |             |            |               |                                                                                                                                               |
|----------------|------------|-------------|------------|---------------|-----------------------------------------------------------------------------------------------------------------------------------------------|
| TCONS_00029978 | -0.103575  | -0.212037   | -0.0803675 | BGIOSGA029819 | XP_006660595.1 enhanced ethylene response protein 5                                                                                           |
| TCONS_00031029 | -0.103532  | 0.309822    | 1.1237     | BGIOSGA032846 | XP_006661735.1 alanine aminotransferase 2                                                                                                     |
| TCONS_00000118 | -0.103389  | -0.0882829  | -0.0844564 | BGIOSGA010309 | XP_006645454.1 factor of DNA methylation 1-like                                                                                               |
| TCONS_00007986 | -0.103093  | 0.0892673   | 0.242263   | BGIOSGA007095 | XP_015689233.1PREDICTED: uncharacterized protein LOC102707936                                                                                 |
| TCONS_00032036 | -0.102698  | 0.581       | -0.158486  | BGIOSGA032648 | XP_006661705.1 protein DETOXIFICATION 16-like                                                                                                 |
| TCONS_00012286 | -0.102672  | -0.267512   | 0.76903    | BGIOSGA002058 | XP_015690180.1 E3 ubiquitin-protein ligase SINAT3-like                                                                                        |
| TCONS_00028280 | -0.102657  | 0.833241    | 0.994355   | BGIOSGA024349 | XP_015695661.1 squamosa promoter-binding-like protein 14                                                                                      |
| TCONS_00029299 | -0.102507  | -0.537504   | 0.913854   | BGIOSGA031041 | XP_006661409.1 cyclin-C1-1                                                                                                                    |
| TCONS_00008095 | -0.102182  | -1.05597    | 0.562256   | BGIOSGA015157 | XP_004952609.1COPII coat assembly protein SEC16                                                                                               |
| TCONS_00018366 | -0.102182  | 1.03713     | -0.940244  | #N/A          | #N/A                                                                                                                                          |
| TCONS_00024048 | -0.102135  | 0.401489    | 0.561405   | BGIOSGA026085 | XP_006657927.2 U3 small nucleolar RNA-associated protein 18 homolog isoform X1                                                                |
| TCONS_00037218 | -0.102129  | -0.167423   | 0.258508   | BGIOSGA028595 | XP_004962955.1translation initiation factor eIF-2B subunit alpha                                                                              |
| TCONS_00000449 | -0.102002  | -0.144931   | -0.16985   | BGIOSGA017053 | XP_006645645.2PREDICTED: uncharacterized protein LOC102714794                                                                                 |
| TCONS_00017279 | -0.101969  | -0.0360299  | 0.0641609  | BGIOSGA018343 | XP_006654139.1 lysine-specific demethylase JMJ703                                                                                             |
| TCONS_00018259 | -0.101838  | 1.67609     | 0.195858   | BGIOSGA009102 | XP_004961326.1AP2/ERF and B3 domain-containing protein Os05g0549800                                                                           |
| TCONS_00033585 | -0.101704  | 0.201991    | 0.319158   | BGIOSGA006509 | XP_006663492.1PREDICTED: uncharacterized protein LOC102707074                                                                                 |
| TCONS_00025799 | -0.101442  | 0.190697    | -0.304951  | BGIOSGA016652 | XP_006659047.1 U-box domain-containing protein 4                                                                                              |
| TCONS_00035919 | -0.101384  | 0.186509    | -1.70287   | BGIOSGA003613 | XP_006664006.1 chloroplast stem-loop binding protein of 41 kDa b, chloroplastic                                                               |
| TCONS_00014414 | -0.101324  | 0.462533    | -0.480613  | BGIOSGA027635 | XP_015691491.1 probable RNA-dependent RNA polymerase 2                                                                                        |
| TCONS_00021153 | -0.101169  | -0.378981   | -0.942745  | BGIOSGA025368 | XP_006656305.1 transcription initiation factor TFIID subunit 5                                                                                |
| TCONS_00018040 | -0.100854  | 0.478123    | 0.880762   | BGIOSGA022536 | XP_006654569.1 ABSCISIC ACID-INSENSITIVE 5-like protein 2                                                                                     |
| TCONS_00027445 | -0.10078   | -0.512009   | -0.797301  | BGIOSGA024536 | XP_003571426.1phenolic glucoside malonyltransferase 1                                                                                         |
| TCONS_00021553 | -0.10076   | 0.137202    | -0.450138  | BGIOSGA012239 | XP_006655758.1 40S ribosomal protein S20                                                                                                      |
| TCONS_00003320 | -0.100753  | 0.099148    | 1.44923    | BGIOSGA026501 | XP_002457650.2calmodulin-binding protein 25                                                                                                   |
| TCONS_00007910 | -0.100711  | -0.429414   | -0.335964  | BGIOSGA006568 | XP_015689515.1PREDICTED: uncharacterized protein LOC102711407 isoform X1                                                                      |
| TCONS_00028290 | -0.100682  | 0.357471    | 0.377982   | BGIOSGA029535 | XP_006659579.1PREDICTED: uncharacterized protein LOC102711369                                                                                 |
| TCONS_00008296 | -0.100503  | 0.0996016   | -0.124074  | BGIOSGA014880 | XP_006647447.2 beta-1,4-mannosyl-glycoprotein 4-beta-N-acetylglucosaminyltransferase-like isoform X1                                          |
| TCONS_00014366 | -0.100474  | -3.72793    | -2.32846   | BGIOSGA036203 | XP_003581302.1sugar transport protein MST1                                                                                                    |
| TCONS_00005393 | -0.100437  | -0.486201   | 0.384307   | BGIOSGA035975 | XP_002451521.1molybdopterin synthase catalytic subunit                                                                                        |
| TCONS_00032982 | -0.100374  | -0.682853   | -0.140056  | BGIOSGA034818 | XP_008679418.1signal recognition particle 54 kDa protein, chloroplastic isoform X2                                                            |
| TCONS_00004272 | -0.100278  | 0.0468129   | -0.425831  | BGIOSGA018279 | XP_006644603.1 phospholipase A1-II 5 isoform X2                                                                                               |
| TCONS_00008327 | -0.100106  | 0.9543      | 0.265207   | BGIOSGA006099 | XP_006647466.1 transcription factor GTE9-like                                                                                                 |
| TCONS_00036074 | -0.099945  | -0.783146   | -0.126013  | BGIOSGA010054 | XP_006664039.2 vacuolar protein sorting-associated protein 26A-like isoform X1                                                                |
| TCONS_00007794 | -0.0998706 | 1.8158      | 0.282917   | BGIOSGA035413 | XP_003572542.1ABC transporter E family member 2 isoform X1                                                                                    |
| TCONS_00018568 | -0.0996292 | 0.209368    | 0.102343   | BGIOSGA018864 | XP_003569073.1protein EMBRYO SAC DEVELOPMENT ARREST 30                                                                                        |
| TCONS_00013817 | -0.0994026 | -0.741589   | -0.904259  | BGIOSGA014014 | XP_006652121.2PREDICTED: uncharacterized protein LOC102703480                                                                                 |
| TCONS_00002820 | -0.0992436 | 0.415391    | 0.661577   | BGIOSGA029493 | XP_004294038.1 histone deacetylase HDT1-like                                                                                                  |
| TCONS_00008505 | -0.0992239 | -0.404888   | 0.131278   | BGIOSGA035269 | XP_015689576.1 ELMO domain-containing protein A-like                                                                                          |
| TCONS_00010206 | -0.0992118 | -0.697251   | -0.430242  | BGIOSGA005049 | XP_015691204.1 uncharacterized WD repeat-containing protein C2A9.03-like isoform X1                                                           |
| TCONS_00012971 | -0.099072  | -1.36723    | 1.16457    | BGIOSGA010021 | XP_015690023.1 tetratricopeptide repeat protein 38                                                                                            |
| TCONS_00036666 | -0.0988327 | 0.449221    | -0.071172  | BGIOSGA005605 | XP_004978649.1structure-specific endonuclease subunit slx1                                                                                    |
| TCONS_00010875 | -0.0987358 | -0.240386   | -0.49445   | BGIOSGA013498 | XP_015691314.1PREDICTED: uncharacterized protein LOC102700881                                                                                 |
| TCONS_00005845 | -0.0987297 | -0.456228   | -0.0957359 | BGIOSGA007666 | XP_009123854.1 protein phosphatase 2C and cyclic nucleotide-binding/kinase domain-containing protein                                          |
| TCONS_00017092 | -0.0986583 | -2.16648    | 0.31271    | BGIOSGA020063 | XP_003566126.1cytochrome P450 714D1                                                                                                           |
| TCONS_00005428 | -0.0986175 | 0.268133    | -0.555314  | BGIOSGA007537 | XP_015689253.1 centrosome-associated protein CEP250                                                                                           |
| TCONS_00009786 | -0.0985858 | -0.00563373 | -0.655686  | BGIOSGA012338 | XP_006649857.1 trifunctional UDP-glucose 4,6-dehydratase/UDP-4-keto-6-deoxy-D-glucose 3,5-epimerase/UDP-4-keto-L-rhamnose-reductase RHM1-like |
| TCONS_00015046 | -0.0985145 | -0.21931    | 0.0495185  | BGIOSGA006757 | XP_006652903.1 probable cyclic nucleotide-gated ion channel 5                                                                                 |
| TCONS_00000139 | -0.0984093 | 0.167459    | -0.148526  | BGIOSGA002713 | XP_006643688.1 plastidic glucose transporter 4                                                                                                |
| TCONS_00022754 | -0.0980271 | 0.103661    | -0.322719  | BGIOSGA004651 | XP_015694080.1 tubulin beta-3 chain isoform X2                                                                                                |
| TCONS_00022828 | -0.0979247 | 0.523229    | -0.228866  | BGIOSGA007551 | XP_015694133.1 adagio-like protein 1                                                                                                          |
| TCONS_00030817 | -0.0978884 | 0.247682    | 0.308103   | BGIOSGA004748 | XP_006661663.1 V-type proton ATPase subunit a3-like                                                                                           |

transcriptome

|                |            |           |           |               |                                                                                            |
|----------------|------------|-----------|-----------|---------------|--------------------------------------------------------------------------------------------|
| TCONS_00031470 | -0.0978401 | -0.62739  | -0.483576 | BGIOSGA011706 | XP_006661963.1 molybdate-anion transporter                                                 |
| TCONS_00006361 | -0.097723  | -0.596759 | -0.877153 | BGIOSGA030090 | XP_006647439.1 probable serine/threonine-protein kinase DDB_G0276461                       |
| TCONS_00036891 | -0.0976765 | -2.16409  | -0.97669  | BGIOSGA013813 | XP_015698545.1 probable calcium-binding protein CML28                                      |
| TCONS_00005652 | -0.0976166 | 1.63535   | 1.80638   | BGIOSGA005456 | XP_006647062.1 probable ADP-ribosylation factor GTPase-activating protein AGD14 isoform X1 |
| TCONS_00029604 | -0.0975484 | -1.90484  | -0.622968 | BGIOSGA036071 | XP_006655836.1 DNA-directed RNA polymerase I subunit rpa43-like isoform X1                 |
| TCONS_00024578 | -0.0973105 | 0.751638  | 0.544429  | BGIOSGA009696 | XP_006657449.2 PREDICTED: uncharacterized protein LOC102708350                             |
| TCONS_00014872 | -0.0972593 | -0.885765 | 0.590978  | BGIOSGA008874 | XP_015691685.1 cell division cycle 20.2, cofactor of APC complex-like                      |
| TCONS_00004921 | -0.0972171 | 0.549573  | 0.358043  | BGIOSGA034421 | XP_006645191.1 fructose-bisphosphate aldolase cytoplasmic isozyme-like                     |
| TCONS_00034652 | -0.0972001 | 1.02133   | 1.09157   | BGIOSGA003234 | XP_006662909.1 RRP15-like protein isoform X2                                               |
| TCONS_00029503 | -0.0971618 | -0.658695 | -0.527998 | BGIOSGA031257 | XP_015696703.1 organic cation/carnitine transporter 7-like isoform X2                      |
| TCONS_00018443 | -0.0970681 | 1.07058   | -0.281204 | BGIOSGA002542 | XP_014754694.1 paired amphipathic helix protein Sin3-like 4                                |
| TCONS_00018475 | -0.0969359 | 0.756902  | 0.932407  | BGIOSGA004186 | NP_001150630.1 pseudouridylate synthase/transporter                                        |
| TCONS_00014451 | -0.0969031 | 0.311506  | 0.237393  | BGIOSGA008120 | XP_006653525.1 eukaryotic translation initiation factor 4B1-like                           |
| TCONS_00031355 | -0.0966878 | 0.757032  | 0.773424  | BGIOSGA033168 | XP_015697418.1 probable prefoldin subunit 5                                                |
| TCONS_00036080 | -0.0966413 | -0.453172 | 0.224452  | BGIOSGA017454 | XP_002442191.1 eukaryotic translation initiation factor 5B                                 |
| TCONS_00028220 | -0.0966287 | 1.03236   | -0.789433 | BGIOSGA015096 | XP_003574679.1 UDP-glycosyltransferase 89B1                                                |
| TCONS_00016568 | -0.0966028 | -0.270511 | -1.04972  | BGIOSGA013123 | XP_006652779.1 calcium-transporting ATPase 8, plasma membrane-type-like isoform X1         |
| TCONS_00001667 | -0.0965819 | -0.557857 | 0.131205  | BGIOSGA004302 | XP_006644590.1 probable magnesium transporter NIPA9                                        |
| TCONS_00001661 | -0.0963628 | 0.458004  | 0.366     | BGIOSGA027568 | XP_003569648.1 uncharacterized protein LOC100838789                                        |
| TCONS_00002966 | -0.0963414 | 0.13545   | 0.0817519 | BGIOSGA028858 | XP_006645569.1 FRIGIDA-like protein 4a                                                     |
| TCONS_00035875 | -0.0962315 | -0.508074 | -0.166149 | BGIOSGA037249 | XP_015698748.1 probable Ufm1-specific protease                                             |
| TCONS_00009418 | -0.0956491 | 1.26395   | 0.218064  | BGIOSGA011972 | XP_006649494.1 elongation factor 1-alpha                                                   |
| TCONS_00014446 | -0.0956144 | -1.03067  | -2.02198  | BGIOSGA004078 | XP_015691861.1 BTB/POZ domain-containing protein At1g67900-like                            |
| TCONS_00014790 | -0.0955121 | 1.06559   | -0.110681 | BGIOSGA037276 | XP_002446969.1 guard cell S-type anion channel SLAC1                                       |
| TCONS_00013048 | -0.0954559 | 0.161684  | 0.0171315 | BGIOSGA009938 | XP_006651740.1 phosphatidylinositol 4-kinase alpha 1                                       |
| TCONS_00002336 | -0.0953001 | 0.517709  | 0.109071  | BGIOSGA004977 | XP_006645165.1 60S ribosomal protein L5-1                                                  |
| TCONS_00015242 | -0.0952409 | -0.428356 | 0.145947  | BGIOSGA015738 | XP_006652062.1 rhomboid-like protein 19                                                    |
| TCONS_00009738 | -0.0950578 | -0.385452 | 0.626956  | BGIOSGA012287 | XP_002468129.2 uncharacterized protein LOC8054288                                          |
| TCONS_00032196 | -0.0950578 | 0.936477  | 5.11524   | BGIOSGA015061 | XP_008776735.1 BURP domain-containing protein 12-like                                      |
| TCONS_00004179 | -0.0950472 | -0.632545 | 0.608569  | BGIOSGA007472 | XP_015689583.1 O-acyltransferase WSD1-like                                                 |
| TCONS_00009508 | -0.0948548 | 0.210709  | -0.368797 | BGIOSGA006680 | XP_006663973.1 40S ribosomal protein S3a                                                   |
| TCONS_00036249 | -0.0948332 | -1.95412  | -1.75734  | BGIOSGA018709 | XP_021301504.1 probable boron transporter 2                                                |
| TCONS_00005217 | -0.0944595 | -0.296713 | -0.219272 | BGIOSGA007329 | XP_006648202.1 26S proteasome non-ATPase regulatory subunit 10-like                        |
| TCONS_00025940 | -0.0943437 | -0.625525 | 1.21694   | BGIOSGA014578 | XP_006659130.1 putative glycerol-3-phosphate transporter 1                                 |
| TCONS_00015763 | -0.0941489 | 0.796935  | 0.464508  | BGIOSGA016236 | XP_006652203.1 stearoyl-[acyl-carrier-protein] 9-desaturase 5, chloroplastic               |
| TCONS_00004784 | -0.0938963 | 1.80135   | 1.18992   | BGIOSGA026957 | XP_002458823.1 G-box-binding factor 4                                                      |
| TCONS_00009751 | -0.0937826 | 1.55177   | 0.261137  | BGIOSGA028786 | XP_008654057.1 serine/threonine-protein phosphatase PP1 isoform X1                         |
| TCONS_00030444 | -0.0937731 | -0.881571 | -1.20464  | BGIOSGA028564 | XP_006660908.1 SKP1-like protein 1B                                                        |
| TCONS_00032080 | -0.093695  | -0.92338  | -1.10824  | BGIOSGA028967 | XP_015696973.1 probable protein phosphatase 2C 71                                          |
| TCONS_00017173 | -0.0934286 | -0.637034 | -0.092684 | BGIOSGA027666 | XP_015696101.1 PREDICTED: uncharacterized protein LOC102719510                             |
| TCONS_00013164 | -0.0932567 | -1.6967   | -1.2337   | BGIOSGA032319 | XP_004981799.1 uncharacterized protein LOC10177146                                         |
| TCONS_00017570 | -0.0932517 | -2.35733  | -2.24428  | BGIOSGA017870 | XP_006654265.1 CBL-interacting protein kinase 18                                           |
| TCONS_00025616 | -0.0930852 | 0.0434123 | 0.141473  | BGIOSGA023819 | XP_006658892.1 transcription-associated protein 1-like                                     |
| TCONS_00024302 | -0.0930557 | -0.386994 | -0.943018 | BGIOSGA020348 | XP_024318711.1 tubby-like F-box protein 6                                                  |
| TCONS_00006572 | -0.0930387 | 0.540118  | 1.20647   | BGIOSGA033883 | XP_006648897.1 PREDICTED: uncharacterized protein LOC102705603 isoform X1                  |
| TCONS_00009101 | -0.0928959 | 0.419566  | 0.621459  | BGIOSGA017183 | XP_015689007.1 probable phospholipase A2 homolog 1                                         |
| TCONS_00032371 | -0.0926948 | 0.72178   | 1.13903   | BGIOSGA031756 | XP_006650259.2 psbP-like protein 1, chloroplastic isoform X2                               |
| TCONS_00000971 | -0.092594  | -0.40045  | -0.343605 | BGIOSGA017112 | XP_006644189.1 LEC14B protein-like                                                         |
| TCONS_00004055 | -0.0923496 | 0.742031  | -0.809959 | BGIOSGA026933 | XP_015689374.1 CASP-like protein 4U1                                                       |
| TCONS_00004330 | -0.0923336 | 0.348569  | 0.257471  | #N/A          | #N/A                                                                                       |
| TCONS_00002346 | -0.0923203 | 0.895907  | 0.0475246 | BGIOSGA014827 | XP_006645176.1 CMP-sialic acid transporter 3                                               |
| TCONS_00020194 | -0.0922875 | 0.559839  | 0.221457  | BGIOSGA021342 | XP_004964738.1 proteasome subunit alpha type-4-2                                           |
| TCONS_00011390 | -0.0922778 | 0.245666  | 0.230424  | BGIOSGA025008 | XP_006661016.2 PREDICTED: uncharacterized protein LOC102712932                             |
| TCONS_00006890 | -0.0920242 | 0.256948  | 0.581731  | BGIOSGA016882 | XP_004953948.1 ethylene-responsive transcription factor RAP2-4                             |
| TCONS_00025918 | -0.0917526 | -0.243893 | -0.144692 | BGIOSGA027993 | XP_006659114.2 monodehydroascorbate reductase 5, mitochondrial                             |
| TCONS_00000328 | -0.0917201 | -0.380027 | 0.833562  | BGIOSGA002904 | XP_006643845.1 F-box protein At2g05970-like                                                |

## transcriptome

|                |            |            |           |               |                                                                                          |
|----------------|------------|------------|-----------|---------------|------------------------------------------------------------------------------------------|
| TCONS_00028550 | -0.0916708 | 0.56417    | 1.23287   | BGIOSGA033364 | XP_021312951.1 uncharacterized protein LOC110433976                                      |
| TCONS_00001172 | -0.0915391 | 0.610739   | 0.386704  | BGIOSGA020890 | NP_001150382.1 LIN1 protein                                                              |
| TCONS_00007305 | -0.0915387 | 0.43728    | 0.230559  | BGIOSGA007176 | XP_015689396.1 structural maintenance of chromosomes protein 3                           |
| TCONS_00014873 | -0.0913375 | -0.59903   | 0.0778773 | BGIOSGA004425 | XP_006652753.1 clathrin interactor EPSIN 1-like                                          |
| TCONS_00008526 | -0.0912356 | -0.185053  | 0.0118954 | BGIOSGA000345 | XP_006647633.1 PREDICTED: uncharacterized protein LOC102719928 isoform X1                |
| TCONS_00029548 | -0.0912203 | -1.99175   | -1.05999  | BGIOSGA031463 | NP_001136855.1 Retinol dehydrogenase 14                                                  |
| TCONS_00026669 | -0.0908238 | -0.539265  | 0.556275  | BGIOSGA028735 | XP_015695619.1 DCN1-like protein 4                                                       |
| TCONS_00021779 | -0.0906573 | 0.21223    | -0.342952 | BGIOSGA009202 | XP_006655875.1 transcription factor SPATULA-like isoform X1                              |
| TCONS_00012676 | -0.0904691 | 1.09316    | -0.824576 | BGIOSGA016924 | XP_002446942.2 putative F-box protein At4g22170                                          |
| TCONS_00029320 | -0.0904504 | -0.0579022 | -0.42315  | BGIOSGA003415 | XP_004957303.1 NAC domain-containing protein 41                                          |
| TCONS_00027131 | -0.0902705 | -0.590392  | -0.48174  | BGIOSGA029173 | XP_002445704.1 NADH dehydrogenase [ubiquinone] iron-sulfur protein 5-B                   |
| TCONS_00028638 | -0.0901576 | 0.423166   | 0.944869  | BGIOSGA030393 | XP_006660473.2 GBF-interacting protein 1-like isoform X1                                 |
| TCONS_00032759 | -0.0901078 | -0.344697  | -0.57172  | BGIOSGA031353 | XP_006662097.1 mitochondrial carnitine/acylcarnitine carrier-like protein                |
| TCONS_00000919 | -0.0900972 | 0.483615   | 0.766373  | BGIOSGA003510 | XP_006645888.2 PREDICTED: uncharacterized protein LOC102701879                           |
| TCONS_00021189 | -0.0900293 | -0.712474  | -0.570065 | BGIOSGA023407 | XP_006657211.2 probable homogentisate phytyltransferase 1, chloroplastic                 |
| TCONS_00016091 | -0.089985  | -0.0718338 | 0.228665  | BGIOSGA025001 | XP_003579963.12-oxoglutarate-dependent dioxygenase DAO                                   |
| TCONS_00030520 | -0.0899748 | 0.653588   | 0.658456  | BGIOSGA029287 | XP_006661527.1 cysteine-tRNA ligase, chloroplastic/mitochondrial                         |
| TCONS_00032820 | -0.0897746 | -0.379361  | 0.235626  | BGIOSGA036859 | XP_021301782.1 protein DETOXIFICATION 44, chloroplastic isoform X3                       |
| TCONS_00015275 | -0.0893953 | -0.48339   | -0.686912 | BGIOSGA015708 | XP_015691813.1 transcription factor E2FB-like                                            |
| TCONS_00029471 | -0.0892273 | 0.628989   | 0.337505  | BGIOSGA029297 | XP_015696862.1 25S rRNA (cytosine-C(5))-methyltransferase nop2 isoform X2                |
| TCONS_00010427 | -0.0891135 | -1.59355   | -1.30217  | BGIOSGA013023 | XP_006650305.1 peroxisomal membrane protein 2-like                                       |
| TCONS_00027122 | -0.0889066 | -1.08394   | -0.464922 | BGIOSGA037087 | XP_006659678.1 transmembrane 9 superfamily member 9-like                                 |
| TCONS_00002713 | -0.0888915 | -1.26341   | -0.415103 | BGIOSGA002518 | XP_015699285.1 probable receptor-like protein kinase At1g67000                           |
| TCONS_00008796 | -0.0888257 | 0.72319    | -0.558788 | BGIOSGA027247 | XP_002452564.1 uncharacterized protein LOC8075719                                        |
| TCONS_00022382 | -0.0887929 | 0.427197   | -0.825254 | BGIOSGA036287 | XP_006657037.1 CBL-interacting protein kinase 25-like                                    |
| TCONS_00023045 | -0.0887602 | 0.705642   | 0.361464  | BGIOSGA007419 | XP_006659404.1 eukaryotic translation initiation factor 3 subunit C-like                 |
| TCONS_00007509 | -0.0887321 | -0.389801  | 0.801948  | BGIOSGA022688 | XP_006647004.1 sodium-coupled neutral amino acid transporter 1-like                      |
| TCONS_00037526 | -0.0886887 | 0.471079   | 0.286319  | BGIOSGA022468 | XP_015698719.1 auxin response factor 25                                                  |
| TCONS_00019231 | -0.0886819 | -1.00202   | -0.587067 | BGIOSGA026305 | XP_003568536.1 probable glycosyltransferase STELLO2                                      |
| TCONS_00027311 | -0.0885616 | -0.376662  | -0.494447 | BGIOSGA024146 | XP_006659812.1 transcription factor ILR3-like                                            |
| TCONS_00009076 | -0.0885385 | 0.848614   | 0.488591  | BGIOSGA033230 | XP_004954465.1 uncharacterized protein LOC101774373                                      |
| TCONS_00000670 | -0.0884062 | -0.584896  | -0.431601 | BGIOSGA003257 | XP_006645769.1 50S ribosomal protein 5, chloroplastic                                    |
| TCONS_00008633 | -0.0883156 | -2.06526   | -1.9619   | BGIOSGA001376 | XP_006648955.1 pentatricopeptide repeat-containing protein At1g31920                     |
| TCONS_00031070 | -0.0880125 | 0.405665   | 1.0112    | BGIOSGA032889 | XP_002467267.1 protein HGH1 homolog                                                      |
| TCONS_00012955 | -0.0878523 | -2.05905   | -1.26422  | BGIOSGA010034 | XP_006650416.1 PREDICTED: uncharacterized protein LOC102714440                           |
| TCONS_00035766 | -0.0877511 | -2.4564    | -2.34184  | BGIOSGA038223 | XP_006664438.1 2-alkenal reductase (NADP(+)-dependent)-like                              |
| TCONS_00031411 | -0.087747  | -0.177748  | 0.927652  | BGIOSGA033224 | XP_015697143.1 pentatricopeptide repeat-containing protein At2g20710, mitochondrial-like |
| TCONS_00035326 | -0.0876734 | 0.491157   | 0.479773  | BGIOSGA026370 | XP_006663096.2 PREDICTED: uncharacterized protein LOC102715982                           |
| TCONS_00023253 | -0.0876624 | 0.304202   | 0.717772  | BGIOSGA013742 | XP_006658347.1 SEC12-like protein 1 isoform X1                                           |
| TCONS_00022198 | -0.0876043 | -0.0245879 | -0.167341 | BGIOSGA005467 | XP_008668705.1 signal recognition particle 19 kDa protein                                |
| TCONS_00014190 | -0.0872469 | -0.626108  | -0.694129 | BGIOSGA010861 | XP_015691999.1 neutral/alkaline invertase 3, chloroplastic-like                          |
| TCONS_00027142 | -0.0871952 | -0.470461  | -0.293408 | BGIOSGA004839 | XP_021320832.160S ribosomal protein L10a isoform X1                                      |
| TCONS_00028957 | -0.0871749 | -0.335282  | 0.0808904 | BGIOSGA030713 | XP_015696886.1 PREDICTED: uncharacterized protein LOC107305020 isoform X4                |
| TCONS_00017798 | -0.0870158 | 0.218892   | 0.521241  | BGIOSGA025694 | XP_006654398.2 cysteine proteinase inhibitor 3-like                                      |
| TCONS_00011505 | -0.0869645 | 0.192746   | -0.611491 | BGIOSGA028357 | XP_006651009.2 protein NLP1-like                                                         |
| TCONS_00016933 | -0.0866168 | -0.90307   | -0.145323 | BGIOSGA014031 | XP_006653082.1 tubulin-folding cofactor B                                                |
| TCONS_00011164 | -0.0866095 | -0.753791  | -0.270075 | BGIOSGA030649 | XP_006651935.1 protochlorophyllide-dependent translocon component 52, chloroplastic-like |
| TCONS_00033822 | -0.0865727 | -1.82797   | -0.43084  | BGIOSGA035579 | XP_006663039.1 putative disease resistance RPP13-like protein 3 isoform X1               |
| TCONS_00031432 | -0.0865652 | 0.0717734  | -0.267443 | BGIOSGA033247 | XP_021306494.1 leukocyte receptor cluster member 1 homolog                               |
| TCONS_00005049 | -0.0865252 | -0.193942  | -0.202658 | BGIOSGA000167 | XP_006645293.2 spermatogenesis-associated protein 20 isoform X1                          |
| TCONS_00009870 | -0.0864447 | 0.0747248  | 0.31154   | BGIOSGA018246 | XP_006649933.1 40S ribosomal protein S7                                                  |
| TCONS_00009197 | -0.0863411 | -0.480786  | 0.322643  | BGIOSGA007417 | XP_003558962.1 cyclin-dependent kinase A-1                                               |
| TCONS_00030103 | -0.0862894 | 0.320551   | 1.40153   | BGIOSGA029699 | XP_006660652.1 E3 ubiquitin-protein ligase AIP2                                          |

## transcriptome

|                |            |            |            |               |                                                                                            |
|----------------|------------|------------|------------|---------------|--------------------------------------------------------------------------------------------|
| TCONS_00004934 | -0.0862672 | -0.335779  | -0.521514  | BGIOSGA036314 | XP_006645200.1 endoribonuclease Dicer homolog 3a isoform X5                                |
| TCONS_00022121 | -0.0859598 | 0.729809   | 0.728886   | BGIOSGA021384 | XP_006656910.2 ERAD-associated E3 ubiquitin-protein ligase HRD1                            |
| TCONS_00015970 | -0.085929  | -0.141884  | -0.0186457 | BGIOSGA015008 | XP_006652334.1 probable signal peptidase complex subunit 2                                 |
| TCONS_00020690 | -0.0856102 | -0.0751347 | -0.626067  | BGIOSGA022884 | XP_006661782.1 pheophytinase, chloroplastic                                                |
| TCONS_00014816 | -0.0854793 | -0.794677  | -1.75549   | BGIOSGA016988 | XP_006652694.1 pentatricopeptide repeat-containing protein At5g13770, chloroplastic        |
| TCONS_00033629 | -0.0854506 | 0.709221   | 0.611536   | BGIOSGA006690 | XP_006662991.1 ABC transporter E family member 2                                           |
| TCONS_00026114 | -0.0853829 | -0.510738  | -0.444109  | BGIOSGA014361 | XP_006659213.1 UDP-N-acetylglucosamine diphosphorylase 1-like                              |
| TCONS_00027721 | -0.0853694 | -1.07438   | -1.04399   | BGIOSGA027282 | XP_003573659.2F-box protein At5g03100 isoform X2                                           |
| TCONS_00023951 | -0.0853568 | -1.08325   | -0.3459    | BGIOSGA005858 | XP_006657871.1 probable serine/threonine-protein kinase WNK1                               |
| TCONS_00000573 | -0.0851224 | 1.00295    | 0.844018   | BGIOSGA000971 | XP_003566368.250S ribosomal protein L3-2, chloroplastic                                    |
| TCONS_00020323 | -0.0850082 | 0.0423884  | 0.0761275  | BGIOSGA022515 | XP_006656748.2 pantothenate kinase 1                                                       |
| TCONS_00012846 | -0.0848536 | -1.50645   | 0.0603867  | BGIOSGA016232 | XP_015691089.1 chlorophyll(ide) b reductase NOL, chloroplastic isoform X2                  |
| TCONS_00037589 | -0.084639  | -1.45848   | -1.60922   | BGIOSGA035852 | XP_015698584.1PREDICTED: uncharacterized protein LOC102711115                              |
| TCONS_00016248 | -0.084619  | 0.348841   | -0.14718   | BGIOSGA007591 | XP_002448165.2putative disease resistance RPP13-like protein 1                             |
| TCONS_00005459 | -0.0846034 | 0.556771   | -0.89879   | BGIOSGA032160 | XP_006648324.2 thiosulfate sulfurtransferase 16, chloroplastic-like                        |
| TCONS_00034825 | -0.0844769 | #NA        | -0.984853  | BGIOSGA034019 | XP_003560487.1anthocyanidin 3-O-glucosyltransferase                                        |
| TCONS_00018574 | -0.084442  | 0.478169   | 0.652118   | BGIOSGA018860 | XP_006654013.1 putative RNA polymerase II subunit B1 CTD phosphatase RPAP2 homolog         |
| TCONS_00029678 | -0.0843796 | -1.45658   | -0.769754  | BGIOSGA031939 | XP_021318578.1phospholipid-transporting ATPase 2 isoform X6                                |
| TCONS_00010749 | -0.0841576 | -0.0609312 | 0.458089   | BGIOSGA033241 | XP_006650434.1 valine-tRNA ligase, mitochondrial 1-like                                    |
| TCONS_00033045 | -0.0841389 | -0.0480817 | -0.125079  | BGIOSGA015098 | XP_006662764.1 RNA-binding protein FUS-like                                                |
| TCONS_00016227 | -0.0838913 | -0.526809  | 0.400428   | BGIOSGA014747 | XP_006653589.2 general transcription factor IIH subunit 2                                  |
| TCONS_00013050 | -0.0838186 | -0.186918  | -0.112631  | BGIOSGA009936 | XP_006650487.1 coatomer subunit alpha-3 isoform X1                                         |
| TCONS_00006669 | -0.0837751 | 0.388097   | 0.623613   | BGIOSGA017003 | XP_006662363.1 probable purine permease 11                                                 |
| TCONS_00026111 | -0.0837446 | 0.0726575  | 0.833155   | BGIOSGA027463 | XP_006659930.1 bifunctional purine biosynthesis protein PurH isoform X1                    |
| TCONS_00006144 | -0.0837271 | -1.14565   | 1.50713    | BGIOSGA025074 | XP_003575031.1glycerophosphodiester phosphodiesterase GDPD1, chloroplastic                 |
| TCONS_00009687 | -0.083642  | -0.257794  | -0.394549  | BGIOSGA012237 | XP_006649744.1 peptidyl-tRNA hydrolase ICT1, mitochondrial                                 |
| TCONS_00023365 | -0.0835084 | 0.0120549  | 0.120396   | BGIOSGA025407 | XP_004955822.160S ribosomal protein L24                                                    |
| TCONS_00036903 | -0.0834209 | 0.431394   | 1.89547    | BGIOSGA033341 | XP_006645389.1 probable glutathione S-transferase                                          |
| TCONS_00009327 | -0.0834133 | -0.194681  | -0.167173  | BGIOSGA036374 | XP_006651047.2 lysine-specific demethylase SE14-like                                       |
| TCONS_00003440 | -0.0834115 | -0.0580045 | -0.211956  | BGIOSGA001785 | XP_006645828.1 protein translocase subunit SECA1, chloroplastic                            |
| TCONS_00012782 | -0.0833888 | -3.44332   | -1.1082    | BGIOSGA035878 | XP_015690817.1 protein NETWORKED 1A-like                                                   |
| TCONS_00003287 | -0.0833811 | 0.182914   | -0.145797  | BGIOSGA036677 | XP_015688142.1 probable peptide/nitrate transporter At3g43790                              |
| TCONS_00011936 | -0.0833635 | -3.9837    | -1.98766   | BGIOSGA011075 | XP_004984959.11ST1-like protein                                                            |
| TCONS_00008749 | -0.0831611 | 0.263978   | 0.23422    | BGIOSGA005683 | XP_006647841.1 rRNA-processing protein fcf2-like                                           |
| TCONS_00016875 | -0.0831463 | 0.115543   | -0.414457  | BGIOSGA001898 | XP_006653027.1 pyruvate kinase, cytosolic isozyme                                          |
| TCONS_00010556 | -0.0830586 | -0.241985  | 1.17551    | BGIOSGA010207 | XP_006650319.1 iron-sulfur protein NUBPL                                                   |
| TCONS_00018449 | -0.0830401 | -0.0819463 | -0.221454  | BGIOSGA008606 | XP_006653930.1 50S ribosomal protein L28, chloroplastic                                    |
| TCONS_00015767 | -0.0829724 | -0.900532  | 0.128469   | BGIOSGA000233 | XP_022684244.1dynamin-related protein 3A                                                   |
| TCONS_00022964 | -0.0829522 | -0.89461   | -1.31088   | BGIOSGA023470 | XP_015695189.1 glutamate receptor 3.5-like                                                 |
| TCONS_00021546 | -0.0828596 | 0.597082   | 0.01763    | BGIOSGA000532 | XP_004964437.1protein GPR107                                                               |
| TCONS_00024751 | -0.0828184 | -3.35704   | -1.69694   | BGIOSGA027158 | XP_006657551.1 probable cellulose synthase A catalytic subunit 8 [UDP-forming]             |
| TCONS_00013911 | -0.0827869 | -3.02096   | -1.59787   | BGIOSGA033693 | XP_006652156.1 short-chain dehydrogenase TIC 32, chloroplastic-like                        |
| TCONS_00006030 | -0.0827414 | -0.493518  | 0.354903   | BGIOSGA008182 | XP_015688909.1PREDICTED: uncharacterized protein LOC107303569                              |
| TCONS_00026530 | -0.0827324 | 0.29716    | 0.458032   | BGIOSGA003034 | XP_006660101.2 mitochondrial carrier protein MTM1-like                                     |
| TCONS_00026636 | -0.0825948 | 0.554608   | 1.37295    | BGIOSGA033940 | XP_004487626.1 probable histone H2A.3                                                      |
| TCONS_00028030 | -0.0825877 | -0.230031  | 0.219684   | BGIOSGA021161 | XP_006660138.1 methylcrotonoyl-CoA carboxylase beta chain, mitochondrial                   |
| TCONS_00024417 | -0.0824096 | 1.82248    | -0.990066  | BGIOSGA038098 | XP_021308816.1developmental and secondary metabolism regulator VEL1                        |
| TCONS_00019741 | -0.0823607 | 0.188899   | -0.48072   | BGIOSGA038127 | XP_015692688.1 probable receptor-like protein kinase At1g67000                             |
| TCONS_00037471 | -0.0822441 | -0.321755  | 0.508462   | BGIOSGA009840 | XP_006664711.1 E3 ubiquitin protein ligase DRIP1-like                                      |
| TCONS_00025051 | -0.0822351 | -3.62253   | -1.73897   | BGIOSGA035476 | XP_004956141.1uncharacterized protein LOC101768197                                         |
| TCONS_00001229 | -0.0822205 | 0.233599   | -0.0216013 | BGIOSGA017146 | XP_006644316.1 serine/threonine-protein phosphatase 6 regulatory subunit 3-like isoform X2 |
| TCONS_00028739 | -0.0821003 | 0.523557   | -0.258968  | BGIOSGA030492 | XP_006661107.1 putative disease resistance protein RGA3                                    |
| TCONS_00011155 | -0.0820656 | -1.17795   | -0.575895  | BGIOSGA027058 | XP_006650751.1PREDICTED: uncharacterized protein LOC102717971                              |

transcriptome

|                |            |           |             |               |                                                                                     |
|----------------|------------|-----------|-------------|---------------|-------------------------------------------------------------------------------------|
| TCONS_00005554 | -0.081932  | 0.110383  | 0.361594    | BGIOSGA007663 | XP_006646967.1 ubiquitin receptor RAD23b isoform X2                                 |
| TCONS_00008109 | -0.081744  | 0.817562  | 0.673976    | BGIOSGA019930 | XP_006647332.1 probable glycosyltransferase 2                                       |
| TCONS_00019436 | -0.0817404 | 1.44822   | 0.317793    | BGIOSGA004774 | XP_003568309.1 transcription factor MYB3R-2 isoform X2                              |
| TCONS_00033983 | -0.0816885 | 1.07418   | -0.893839   | BGIOSGA033577 | XP_015698951.1 calmodulin-binding protein 60 D-like                                 |
| TCONS_00032120 | -0.0815848 | 0.71453   | 0.592818    | BGIOSGA032015 | XP_015697159.1 eukaryotic initiation factor 4A-1                                    |
| TCONS_00027785 | -0.0813587 | 0.714246  | 0.0545916   | BGIOSGA004740 | XP_003573688.1 protein RER1A                                                        |
| TCONS_00005236 | -0.0812628 | -0.3083   | -0.0967151  | BGIOSGA027652 | XP_006648213.1 transmembrane protein 120 homolog                                    |
| TCONS_00009739 | -0.0811375 | -0.602204 | 0.195532    | BGIOSGA012291 | XP_006649806.2 OTU domain-containing protein At3g57810 isoform X3                   |
| TCONS_00029896 | -0.0808646 | 3.45613   | 1.42108     | BGIOSGA029909 | XP_006660562.1 probable LRR receptor-like serine/threonine-protein kinase At1g51820 |
| TCONS_00034944 | -0.0808593 | 0.829918  | 0.745112    | BGIOSGA004060 | XP_006662962.1 RNA polymerase II C-terminal domain phosphatase-like 3               |
| TCONS_00010654 | -0.0808449 | -0.509351 | -0.88888    | BGIOSGA013283 | XP_015690883.1 protein ROOT PRIMORDIUM DEFECTIVE 1                                  |
| TCONS_00005553 | -0.0805379 | 0.488506  | 0.129917    | BGIOSGA004087 | XP_006646965.1 HD domain-containing protein 2-like                                  |
| TCONS_00013049 | -0.0803753 | 0.338455  | 0.620854    | BGIOSGA009938 | XP_006650486.1 serine/threonine-protein kinase GRIK1-like                           |
| TCONS_00018677 | -0.0803114 | 0.69055   | 0.895267    | BGIOSGA018754 | XP_004964745.3 pre-mRNA-processing-splicing factor 8A                               |
| TCONS_00016735 | -0.0800542 | 1.26009   | -0.259026   | BGIOSGA014229 | NP_001340287.1 ubiquitin carboxyl-terminal hydrolase 22                             |
| TCONS_00026277 | -0.0800542 | -1.18048  | -0.259026   | BGIOSGA028358 | XP_015695817.1 PREDICTED: uncharacterized protein LOC102707514                      |
| TCONS_00019189 | -0.0799995 | -0.91935  | -0.345821   | BGIOSGA014792 | XP_006652477.1 protein CHROMOSOME TRANSMISSION FIDELITY 7                           |
| TCONS_00030964 | -0.0799704 | -0.605795 | -0.146701   | BGIOSGA032774 | XP_015697333.1 F-box/kelch-repeat protein At1g22040-like                            |
| TCONS_00010292 | -0.0799509 | -0.509997 | 0.673211    | BGIOSGA016721 | XP_006650192.1 PREDICTED: uncharacterized protein LOC102720778                      |
| TCONS_00024801 | -0.0796142 | 0.104714  | -0.488947   | BGIOSGA021524 | XP_006657578.1 PHD finger protein ALFIN-LIKE 2                                      |
| TCONS_00027944 | -0.0795676 | 0.315996  | 0.464616    | BGIOSGA027052 | XP_015696045.1 PREDICTED: uncharacterized protein LOC102704273 isoform X1           |
| TCONS_00030962 | -0.079468  | -1.35465  | -1.29805    | BGIOSGA018366 | XP_015697314.1 acetyl-CoA carboxylase 1                                             |
| TCONS_00034772 | -0.0794071 | -1.31488  | -0.167549   | BGIOSGA015987 | XP_006663388.2 serine carboxypeptidase-like 18                                      |
| TCONS_00025995 | -0.0792608 | -0.638346 | 0.117499    | BGIOSGA000764 | XP_004970074.1 clp protease adapter protein ClpF, chloroplastic                     |
| TCONS_00004926 | -0.0792261 | 0.0638712 | 0.420532    | BGIOSGA000294 | XP_006646582.1 UDP-N-acetylglucosamine--peptide N-acetylglucosaminyltransferase     |
| TCONS_00006876 | -0.0792241 | -0.16409  | 0.470579    | BGIOSGA021620 | XP_015689585.1 PREDICTED: uncharacterized protein LOC102705413                      |
| TCONS_00002489 | -0.0791466 | -0.60064  | 0.187587    | BGIOSGA004267 | XP_006645304.1 nascent polypeptide-associated complex subunit alpha-like protein 1  |
| TCONS_00018676 | -0.0789335 | 0.375315  | -0.620285   | BGIOSGA018756 | XP_006654082.1 PHD finger protein ALFIN-LIKE 1                                      |
| TCONS_00025956 | -0.0787141 | -1.18218  | -1.26238    | BGIOSGA030280 | XP_003578830.1 uncharacterized protein LOC100822076                                 |
| TCONS_00004616 | -0.0786295 | -0.115173 | -0.584519   | BGIOSGA020083 | XP_002458673.1 uncharacterized protein At5g19025                                    |
| TCONS_00010928 | -0.0786295 | 1.82414   | 0.392761    | BGIOSGA033114 | XP_002466479.1 PRA1 family protein B6                                               |
| TCONS_00019370 | -0.0786045 | 0.285198  | -0.555574   | BGIOSGA004862 | XP_006654464.1 actin-1                                                              |
| TCONS_00000274 | -0.0784253 | -0.326936 | 0.0779363   | BGIOSGA004592 | XP_006643783.1 protein synthesis inhibitor II-like                                  |
| TCONS_00028093 | -0.0782572 | 0.870661  | -0.607624   | BGIOSGA010648 | XP_003564855.14-coumarate--CoA ligase-like 5                                        |
| TCONS_00028650 | -0.0779479 | -0.327234 | -0.0759871  | BGIOSGA030402 | XP_006660475.1 PREDICTED: uncharacterized protein LOC102716063 isoform X1           |
| TCONS_00017133 | -0.0779153 | 0.750642  | -0.250121   | BGIOSGA024257 | XP_006654993.1 actin cytoskeleton-regulatory complex protein pan1-like              |
| TCONS_00023072 | -0.0778546 | -0.547085 | -0.192276   | BGIOSGA009739 | XP_006657431.1 probable LRR receptor-like serine/threonine-protein kinase At2g16250 |
| TCONS_00007238 | -0.0778106 | -0.541052 | -0.220323   | BGIOSGA019080 | XP_006659053.1 transcription factor IIIA-like                                       |
| TCONS_00001710 | -0.0776351 | -0.531468 | -2.00204    | BGIOSGA004344 | XP_006644630.1 PREDICTED: uncharacterized protein LOC102715525                      |
| TCONS_00026811 | -0.0775078 | 1.1519    | -0.471839   | BGIOSGA028871 | XP_002445983.1 uncharacterized protein LOC8067040                                   |
| TCONS_00005693 | -0.0773973 | -0.08869  | -0.00744348 | BGIOSGA030511 | XP_006647079.1 probable protein phosphatase 2C 12                                   |
| TCONS_00019813 | -0.0771969 | -0.320832 | -0.0637642  | BGIOSGA031408 | XP_004961181.150S ribosomal protein L12, chloroplastic                              |
| TCONS_00007219 | -0.0771959 | 0.560404  | -0.551294   | BGIOSGA031105 | XP_003571751.1 protein KINESIN LIGHT CHAIN-RELATED 1                                |
| TCONS_00004776 | -0.0771798 | 0.356449  | 0.652875    | BGIOSGA000438 | XP_006645071.1 uricase-2                                                            |
| TCONS_00032084 | -0.076966  | -0.233337 | -1.51083    | BGIOSGA024994 | XP_006661601.1 protein NRT1/ PTR FAMILY 8.3-like                                    |
| TCONS_00032765 | -0.0768816 | 0.822952  | 0.085923    | BGIOSGA031345 | XP_004983558.1 dnaJ homolog subfamily C GRV2                                        |
| TCONS_00008407 | -0.0767391 | 0.0937854 | -0.018082   | BGIOSGA035967 | XP_003580128.160S ribosomal protein L14-1                                           |
| TCONS_00020501 | -0.076499  | -0.646085 | 0.264437    | BGIOSGA005685 | XP_006656871.1 aldehyde dehydrogenase family 2 member B7, mitochondrial-like        |
| TCONS_00030410 | -0.0764599 | -1.31449  | 0.235231    | BGIOSGA029391 | XP_007020909.1 vacuolar protein sorting-associated protein 22 homolog 1 isoform X3  |
| TCONS_00012832 | -0.0763772 | -0.670559 | 0.869303    | BGIOSGA010138 | XP_006650355.2 probable E3 ubiquitin-protein ligase BAH1-like 1 isoform X1          |
| TCONS_00019895 | -0.0763551 | -0.14924  | -0.373866   | BGIOSGA006173 | XP_021316256.1 uncharacterized protein LOC8055410                                   |
| TCONS_00014227 | -0.0762277 | -3.35034  | -2.61451    | BGIOSGA008374 | XP_015691448.1 2-Cys peroxiredoxin BAS1, chloroplastic                              |
| TCONS_00008750 | -0.0757155 | -0.270015 | 0.249664    | BGIOSGA021478 | XP_015689245.1 aspartic proteinase Asp1-like                                        |

transcriptome

|                |            |           |            |               |                                                                                                                                |
|----------------|------------|-----------|------------|---------------|--------------------------------------------------------------------------------------------------------------------------------|
| TCONS_00024624 | -0.0757067 | -0.143833 | -0.814878  | BGIOSGA024760 | XP_006657475.1PREDICTED: uncharacterized protein LOC102715316 isoform X2                                                       |
| TCONS_00023661 | -0.0756763 | 0.273419  | -0.479081  | BGIOSGA013351 | XP_006657691.1 arginine/serine-rich protein PNISR isoform X2                                                                   |
| TCONS_00008789 | -0.0753474 | 0.883589  | 0.622993   | BGIOSGA005647 | XP_006649036.1 nuclear-pore anchor XP_006653023.1 dolichyl-diphosphooligosaccharide--protein glycosyltransferase subunit STT3B |
| TCONS_00016865 | -0.0752996 | 1.28571   | 0.83954    | BGIOSGA010992 | XP_006654872.1 serine/threonine-protein phosphatase 6 regulatory subunit 3-like isoform X1                                     |
| TCONS_00018428 | -0.0752684 | 0.271516  | 0.446363   | BGIOSGA017146 | XP_006654709.1 ras-related protein Rab7-like                                                                                   |
| TCONS_00018204 | -0.0751874 | -1.65449  | -0.4702    | BGIOSGA018386 | XP_021305127.1pre-mRNA-processing-splicing factor 8A                                                                           |
| TCONS_00021686 | -0.0750745 | 0.948017  | 1.33141    | BGIOSGA018755 | XP_002437838.1uncharacterized protein LOC8071317                                                                               |
| TCONS_00003630 | -0.0746924 | 0.175317  | 0.286113   | BGIOSGA007028 | XP_003564221.1protein SRG1                                                                                                     |
| TCONS_00020227 | -0.074689  | 0.634171  | 0.784354   | BGIOSGA022416 | XP_006659609.1PREDICTED: uncharacterized protein LOC102721010                                                                  |
| TCONS_00026960 | -0.0746696 | -0.616125 | -1.21585   | BGIOSGA020942 | XP_006663997.2 E3 ubiquitin-protein ligase UPL2-like                                                                           |
| TCONS_00035945 | -0.0745857 | 0.434656  | -0.166502  | BGIOSGA009162 | XP_015689377.1PREDICTED: uncharacterized protein LOC102718059                                                                  |
| TCONS_00005210 | -0.0745473 | 0.336275  | 0.292438   | BGIOSGA007322 | XP_004966031.1serine/threonine-protein phosphatase PP2A-1 catalytic subunit                                                    |
| TCONS_00020921 | -0.0744889 | 0.416351  | 0.428851   | BGIOSGA004246 | XP_006664361.1 transcription factor VIP1-like                                                                                  |
| TCONS_00035621 | -0.0744618 | 0.319225  | 0.277167   | BGIOSGA034853 | XP_006652248.1PREDICTED: uncharacterized protein LOC102721263                                                                  |
| TCONS_00015841 | -0.0742718 | #NA       | -1.76396   | BGIOSGA015144 | XP_006662757.1 disease resistance protein RGA2-like                                                                            |
| TCONS_00033020 | -0.0742061 | -1.67329  | -0.136076  | BGIOSGA004354 |                                                                                                                                |
| TCONS_00035796 | -0.0741012 | -0.175559 | -0.18073   | BGIOSGA037202 | XP_006664454.2 fructose-bisphosphate aldolase-lysine N-methyltransferase, chloroplastic                                        |
| TCONS_00005992 | -0.0740728 | -0.762847 | -0.196382  | BGIOSGA036886 | XP_006664278.1 non-specific lipid-transfer protein 4                                                                           |
| TCONS_00004629 | -0.0740509 | -1.41045  | -0.75939   | BGIOSGA006546 | XP_006644912.1 synaptotagmin-2-like                                                                                            |
| TCONS_00005629 | -0.0740181 | 0.289947  | 0.122846   | BGIOSGA007506 | XP_006648429.2 putative disease resistance RPP13-like protein 3                                                                |
| TCONS_00004845 | -0.0739049 | 0.469646  | 0.109545   | BGIOSGA014815 | XP_015698070.1 NAC domain-containing protein 48-like                                                                           |
| TCONS_00013012 | -0.0737819 | -0.362937 | -0.0897319 | BGIOSGA009976 | XP_008665260.1elongation of fatty acids protein 3-like                                                                         |
| TCONS_00015313 | -0.0737267 | -0.506436 | -0.209669  | BGIOSGA025570 | XP_015692079.1 sterol 3-beta-glucosyltransferase UGT80A2-like isoform X1                                                       |
| TCONS_00024871 | -0.0736793 | -0.754872 | -0.248885  | BGIOSGA024508 | XP_015694591.1PREDICTED: uncharacterized protein LOC102721466                                                                  |
| TCONS_00030919 | -0.0735229 | -0.42156  | 0.0611879  | BGIOSGA013553 | XP_006648000.1 myosin-15-like                                                                                                  |
| TCONS_00016200 | -0.0733145 | -0.323177 | 0.137336   | BGIOSGA006053 | XP_024311700.1leucine-rich repeat-containing G-protein coupled receptor 4 isoform X1                                           |
| TCONS_00030506 | -0.0731886 | 0.413615  | 0.306037   | BGIOSGA029302 | XP_006661518.1 nudix hydrolase 23, chloroplastic                                                                               |
| TCONS_00008209 | -0.0731097 | -0.790835 | -0.0346195 | BGIOSGA015003 | XP_006647400.1PREDICTED: uncharacterized protein LOC102700211                                                                  |
| TCONS_00028326 | -0.0728719 | -0.457197 | 0.831187   | #N/A          | #N/A                                                                                                                           |
| TCONS_00031442 | -0.0728485 | -0.581868 | -2.23249   | BGIOSGA018965 | XP_006661943.1 actin-2                                                                                                         |
| TCONS_00011925 | -0.0728182 | -0.397726 | -1.44711   | BGIOSGA032183 | XP_006649760.1 probable E3 ubiquitin-protein ligase LOG2                                                                       |
| TCONS_00023430 | -0.0726079 | 0.647528  | -0.159871  | BGIOSGA025462 | XP_006657591.1PREDICTED: uncharacterized protein LOC102700911                                                                  |
| TCONS_00016931 | -0.0724551 | 1.02051   | 0.504511   | BGIOSGA011679 | XP_006653079.2 increased DNA methylation 1                                                                                     |
| TCONS_00018143 | -0.0724499 | -0.491894 | 0.0926524  | BGIOSGA020201 | XP_014754572.1alpha,alpha-trehalose-phosphate synthase [UDP-forming] 1                                                         |
| TCONS_00023793 | -0.0724291 | -1.04807  | 0.0419752  | BGIOSGA021758 | XP_006657772.2 glutamate receptor 3.4-like isoform X1                                                                          |
| TCONS_00000265 | -0.0723676 | 0.0638816 | -0.146703  | BGIOSGA007036 | XP_008673678.2transcription initiation factor TFIID subunit 15b                                                                |
| TCONS_00012937 | -0.0720507 | -0.27413  | -0.322779  | BGIOSGA013510 | XP_006650408.1 BEL 1-like homeodomain protein 7                                                                                |
| TCONS_00009744 | -0.0720236 | -1.22762  | -0.35436   | BGIOSGA019097 | XP_015690888.1 LRR receptor-like serine/threonine-protein kinase FEI 1                                                         |
| TCONS_00013853 | -0.0717957 | 1.54987   | 0.604393   | BGIOSGA023484 | XP_006652141.1 eukaryotic peptide chain release factor GTP-binding subunit ERF3A                                               |
| TCONS_00035023 | -0.0717794 | 0.640236  | -0.174238  | BGIOSGA020235 | XP_002450905.1patatin-like phospholipase domain-containing protein 4                                                           |
| TCONS_00009856 | -0.0716912 | -0.4578   | -1.1948    | BGIOSGA012407 | XP_015691164.1 6-phosphofructo-2-kinase/fructose-2,6-bisphosphatase-like isoform X1                                            |
| TCONS_00007051 | -0.0716327 | 0.142837  | 0.93029    | BGIOSGA009233 | XP_006649139.1 probable 18S rRNA (guanine-N(7))-methyltransferase                                                              |
| TCONS_00028016 | -0.0716071 | 0.616094  | 0.192798   | BGIOSGA028089 | XP_006659179.1 BUD13 homolog                                                                                                   |
| TCONS_00003465 | -0.0715475 | -0.240525 | -0.280129  | BGIOSGA001761 | XP_008810079.1 protein GFS12                                                                                                   |
| TCONS_00019533 | -0.0715166 | -0.12232  | 0.0472985  | BGIOSGA017827 | XP_006654565.1 E3 ubiquitin-protein ligase RING1-like                                                                          |
| TCONS_00027356 | -0.0712685 | -1.05808  | 0.231468   | BGIOSGA007347 | XP_006659835.2 transmembrane protein 120 homolog                                                                               |
| TCONS_00011784 | -0.0711971 | 0.84288   | 0.612473   | BGIOSGA011221 | XP_006651166.1 DExH-box ATP-dependent RNA helicase DEXH14                                                                      |
| TCONS_00022726 | -0.0711744 | 0.357919  | 0.680806   | BGIOSGA020725 | XP_024312552.1formin-like protein 3                                                                                            |
| TCONS_00025786 | -0.0711216 | 0.915563  | 0.559724   | BGIOSGA027848 | XP_006649390.1 ribosome maturation protein SBDS                                                                                |
| TCONS_00008485 | -0.0706605 | -0.219992 | -0.199649  | BGIOSGA031126 | XP_015689428.1 kinesin-like protein NACK1                                                                                      |
| TCONS_00019416 | -0.0706479 | 0.54548   | 2.05727    | BGIOSGA017936 | XP_006654495.1 protein GUCD1 isoform X1                                                                                        |
| TCONS_00028117 | -0.0703977 | -6.20946  | -2.47988   | BGIOSGA026872 | XP_006659474.1PREDICTED: uncharacterized protein LOC102704354                                                                  |
| TCONS_00005615 | -0.0701967 | 0.574863  | 0.0747569  | BGIOSGA022563 | XP_006647021.2 zinc transporter ZIP12                                                                                          |



## transcriptome

|                |            |            |            |               |                                                                                                                                |
|----------------|------------|------------|------------|---------------|--------------------------------------------------------------------------------------------------------------------------------|
| TCONS_00002777 | -0.070165  | -0.685479  | -0.159986  | BGIOSGA002733 | XP_015697568.1 probable serine/threonine-protein kinase At1g18390 isoform X2<br>XP_004970721.1 TLC domain-containing protein 2 |
| TCONS_00002242 | -0.0700291 | -0.38124   | -0.0182367 | BGIOSGA004880 | XP_021313359.1 uncharacterized protein LOC8074102 isoform X2                                                                   |
| TCONS_00036662 | -0.069953  | 0.0496343  | -0.867477  | BGIOSGA023755 | XP_006648254.1 protein DETOXIFICATION 46, chloroplastic                                                                        |
| TCONS_00007261 | -0.069888  | -0.529949  | -0.695857  | BGIOSGA007221 | XP_006650447.1 suppressor of disruption of TFILS-like                                                                          |
| TCONS_00010772 | -0.0697316 | 0.288665   | 0.584317   | BGIOSGA007855 | XP_006651788.1 glucose-1-phosphate adenyltransferase large subunit                                                             |
| TCONS_00013130 | -0.0696822 | -0.703307  | -0.834554  | BGIOSGA009199 | XP_015689506.1 E3 ubiquitin-protein ligase Os04g0590900 isoform X1                                                             |
| TCONS_00008617 | -0.0696148 | -1.43839   | -0.0674854 | BGIOSGA027900 | XP_019078711.1 ethanolamine-phosphate cytidyltransferase isoform X2                                                            |
| TCONS_00034197 | -0.0695739 | -0.0790384 | 0.212155   | BGIOSGA028217 | XP_006649640.1 probable glucan 1,3-alpha-glucosidase                                                                           |
| TCONS_00009573 | -0.0693832 | 0.765344   | 0.606474   | BGIOSGA012122 | XP_006662540.1 C-terminal binding protein AN-like                                                                              |
| TCONS_00031530 | -0.0693076 | -0.492751  | -0.295827  | BGIOSGA011545 | XP_006661868.1 double-stranded RNA-binding protein 6                                                                           |
| TCONS_00032436 | -0.0692475 | 0.590472   | 0.377911   | BGIOSGA031681 | XP_006659275.1 threonine-tRNA ligase, mitochondrial 1                                                                          |
| TCONS_00027760 | -0.0692264 | 0.770728   | 0.676575   | BGIOSGA027239 | XP_006659616.1 calcium-transporting ATPase 8, plasma membrane-type-like isoform X2                                             |
| TCONS_00028301 | -0.0687669 | 1.07941    | 1.57867    | BGIOSGA005135 | XP_006657272.1 T-complex protein 1 subunit eta                                                                                 |
| TCONS_00022806 | -0.0687468 | 1.09528    | 0.180105   | BGIOSGA021336 | XP_015695375.1 DEAD-box ATP-dependent RNA helicase 52B                                                                         |
| TCONS_00024733 | -0.06871   | 1.1791     | -0.151581  | BGIOSGA027614 | XP_003565112.1 DNA mismatch repair protein MLH1 isoform X2                                                                     |
| TCONS_00002573 | -0.0685958 | -0.211204  | 0.242061   | BGIOSGA006140 | XP_006659106.1 beta-glucuronosyltransferase GicAT14B-like                                                                      |
| TCONS_00025900 | -0.0685886 | -0.248537  | 0.296631   | BGIOSGA030859 | XP_015693523.1 protein CREG2                                                                                                   |
| TCONS_00011824 | -0.0685709 | -1.9861    | -0.0436657 | BGIOSGA011186 | XP_006647897.2 pentatricopeptide repeat-containing protein At4g39620, chloroplastic                                            |
| TCONS_00006880 | -0.0685293 | 0.127534   | 1.02338    | BGIOSGA009059 | XP_003558105.1 probable galacturonosyltransferase-like 7                                                                       |
| TCONS_00009884 | -0.0683227 | -0.81706   | -0.175359  | BGIOSGA026261 | NP_001182883.1 putative lipase class 3 family protein precursor                                                                |
| TCONS_00000758 | -0.0682185 | -0.184572  | 0.921029   | BGIOSGA009511 | XP_015693724.1 spermine synthase-like                                                                                          |
| TCONS_00020820 | -0.0682002 | -0.469516  | 0.134682   | BGIOSGA023029 | XP_006656106.1 PREDICTED: uncharacterized protein LOC102702667 isoform X1                                                      |
| TCONS_00016651 | -0.0681421 | -0.44435   | -0.429231  | BGIOSGA014309 | XP_006647845.1 protein CURVATURE THYLAKOID 1A, chloroplastic                                                                   |
| TCONS_00006810 | -0.0679518 | -1.33966   | -0.928717  | BGIOSGA009089 | XP_006647952.1 cyclin-dependent kinase inhibitor 1-like                                                                        |
| TCONS_00006915 | -0.067786  | -0.238269  | -0.493502  | BGIOSGA012328 | XP_006651360.1 putative GTP diphosphokinase RSH1, chloroplastic                                                                |
| TCONS_00010044 | -0.067777  | 0.700148   | -0.0730941 | BGIOSGA012596 | #N/A                                                                                                                           |
| TCONS_00031958 | -0.0677581 | 0.39637    | 0.200118   | #N/A          | #N/A                                                                                                                           |
| TCONS_00036893 | -0.0676845 | -0.462099  | -0.278341  | BGIOSGA034168 | XP_006663917.1 chaperone protein CipC2, chloroplastic                                                                          |
| TCONS_00001602 | -0.0676505 | -0.203544  | -0.472741  | BGIOSGA004239 | XP_015689623.1 protein ABHD17C-like                                                                                            |
| TCONS_00028371 | -0.0676308 | -0.921864  | 0.0282841  | BGIOSGA026592 | XP_010927726.1 COMM domain-containing protein 9                                                                                |
| TCONS_00028107 | -0.0675258 | -0.113255  | 0.742137   | BGIOSGA026884 | XP_006659468.1 cyclin-dependent kinase C-3                                                                                     |
| TCONS_00017726 | -0.0674987 | -0.556588  | -0.83884   | BGIOSGA005202 | XP_006655275.1 putative NAD kinase 3                                                                                           |
| TCONS_00015430 | -0.0674823 | -1.64762   | -0.150078  | BGIOSGA015342 | XP_004961357.1 jacalin-related lectin 19 isoform X2                                                                            |
| TCONS_00018113 | -0.0673488 | -0.141374  | -1.32095   | BGIOSGA020169 | XP_015692873.1 putative rRNA methylase YtqB                                                                                    |
| TCONS_00000010 | -0.06733   | 0.227649   | -0.386817  | BGIOSGA006040 | XP_024316020.1 serine/arginine-rich splicing factor 11                                                                         |
| TCONS_00011737 | -0.0671704 | 0.568371   | 0.933728   | BGIOSGA011270 | XP_015690299.1 tetratricopeptide repeat protein 7B isoform X1                                                                  |
| TCONS_00009347 | -0.0670047 | -0.59292   | 0.497454   | BGIOSGA031850 | XP_015689767.1 FH protein interacting protein FIP2-like                                                                        |
| TCONS_00003042 | -0.0667971 | 0.820557   | 0.265428   | BGIOSGA031561 | XP_006643882.2 aquaporin NIP1-2-like                                                                                           |
| TCONS_00004914 | -0.0667718 | -2.17787   | -1.67815   | BGIOSGA000307 | NP_001140580.1 Protein kinase superfamily protein                                                                              |
| TCONS_00012565 | -0.0667277 | 0.703189   | 1.23534    | BGIOSGA016505 | XP_004982540.1 polyadenylate-binding protein RBP45                                                                             |
| TCONS_00005642 | -0.0666715 | -1.07029   | -0.773787  | BGIOSGA020932 | XP_006647055.1 PREDICTED: uncharacterized protein LOC102712500 isoform X1                                                      |
| TCONS_00016847 | -0.0665689 | -0.670386  | -0.961271  | BGIOSGA007119 | XP_015692160.1 phyto-sulfokine receptor 1-like                                                                                 |
| TCONS_00030374 | -0.0664887 | -0.952492  | 0.363921   | BGIOSGA026550 | XP_015696553.1 PREDICTED: uncharacterized protein LOC102712469                                                                 |
| TCONS_00018700 | -0.0664841 | 0.392392   | 0.431428   | BGIOSGA018729 | XP_006654093.1 PREDICTED: uncharacterized protein LOC102706471                                                                 |
| TCONS_00006725 | -0.0663892 | -0.342544  | -0.227106  | BGIOSGA008895 | XP_015689616.1 uridine-cytidine kinase C-like                                                                                  |
| TCONS_00011956 | -0.0660245 | 0.588736   | 0.220398   | BGIOSGA009526 | XP_006651238.2 anthranilate synthase alpha subunit 2, chloroplastic                                                            |
| TCONS_00012952 | -0.0658057 | -0.106528  | -0.0547824 | BGIOSGA010037 | XP_006650414.2 E3 ubiquitin-protein ligase UPL7                                                                                |
| TCONS_00017332 | -0.0656603 | 0.461491   | 0.522318   | BGIOSGA010919 | XP_006655099.1 abscisic acid receptor PYL8-like                                                                                |
| TCONS_00000278 | -0.0656558 | 0.228919   | 1.21198    | BGIOSGA002855 | XP_010230494.1 RING finger and transmembrane domain-containing protein 2                                                       |
| TCONS_00027297 | -0.0654717 | 0.234807   | -0.146989  | BGIOSGA011245 | XP_006659093.1 BTB/POZ domain-containing protein At1g30440-like                                                                |
| TCONS_00021343 | -0.0654263 | -0.492284  | -0.22054   | BGIOSGA023570 | XP_006657320.1 thylakoid lumenal 16.5 kDa protein, chloroplastic                                                               |
| TCONS_00035013 | -0.0653353 | -0.665343  | 0.384797   | BGIOSGA033844 | XP_006662992.1 glutamyl-tRNA(Gln) amidotransferase subunit B, chloroplastic/mitochondrial                                      |

## transcriptome

|                |            |            |            |               |                                                                              |
|----------------|------------|------------|------------|---------------|------------------------------------------------------------------------------|
| TCONS_00018364 | -0.0652012 | 0.358003   | -0.360166  | BGIOSGA020416 | XP_006655617.1 translation initiation factor IF-2, chloroplastic             |
| TCONS_00001027 | -0.0649473 | 1.00741    | 0.885364   | BGIOSGA024278 | XP_015688348.1PREDICTED: uncharacterized protein LOC102715620                |
| TCONS_00025328 | -0.0649282 | 0.69083    | 0.143783   | BGIOSGA014178 | XP_015695254.1 probable serine/threonine-protein kinase abkC                 |
| TCONS_00037745 | -0.0649047 | -2.18158   | #N/A       | #N/A          | #N/A                                                                         |
| TCONS_00018322 | -0.0648042 | 0.51476    | -0.0616509 | BGIOSGA001073 | XP_006654800.1PREDICTED: uncharacterized protein LOC102700994                |
| TCONS_00033924 | -0.0646932 | 0.184091   | 0.665741   | BGIOSGA034056 | XP_015698007.1 nuclear pore complex protein NUP107                           |
| TCONS_00025050 | -0.0646302 | 0.0653744  | 0.937721   | BGIOSGA024357 | XP_006654002.2 glutamate--cysteine ligase B, chloroplastic                   |
| TCONS_00035602 | -0.0645042 | 0.55567    | -0.378838  | BGIOSGA037016 | XP_006663832.2 trithorax group protein osa-like                              |
| TCONS_00006757 | -0.0644888 | -0.177406  | 0.00344463 | BGIOSGA008927 | XP_006647799.1PREDICTED: uncharacterized protein LOC102721425                |
| TCONS_00019250 | -0.0642221 | 0.84754    | 0.872672   | BGIOSGA018098 | XP_015692591.1 ARM REPEAT PROTEIN INTERACTING WITH ABF2                      |
| TCONS_00019812 | -0.0642072 | 1.22745    | 0.281074   | BGIOSGA009273 | XP_006655600.1 3-ketoacyl-CoA synthase 4-like                                |
| TCONS_00004844 | -0.0641492 | -1.25179   | -0.458087  | BGIOSGA010987 | XP_006645134.1 probable methyltransferase PMT26                              |
| TCONS_00024687 | -0.0641232 | -0.460276  | 0.0544503  | BGIOSGA024698 | XP_006657518.1 glycine-rich RNA-binding protein RZ1C-like                    |
| TCONS_00016574 | -0.0641004 | 0.603819   | 0.482741   | BGIOSGA014747 | XP_006652783.1 mannosyl-oligosaccharide 1,2-alpha-mannosidase MNS1-like      |
| TCONS_00005452 | -0.063942  | -2.04376   | -0.443614  | BGIOSGA020625 | XP_015688456.1PREDICTED: uncharacterized protein LOC102707005                |
| TCONS_00024836 | -0.0639035 | 0.323603   | -0.16547   | BGIOSGA007481 | XP_006657588.1 protein transport protein SEC13 homolog B-like                |
| TCONS_00036834 | -0.0636859 | -2.048     | -1.35909   | BGIOSGA020984 | XP_006664413.2 protein SUPPRESSOR OF GENE SILENCING 3 homolog                |
| TCONS_00002234 | -0.0635257 | -0.133485  | 0.194739   | BGIOSGA004871 | XP_015690472.1 sterol 3-beta-glucosyltransferase UGT80B1                     |
| TCONS_00007360 | -0.0634929 | 0.21369    | 0.680375   | BGIOSGA007125 | XP_006648311.1 VIN3-like protein 2                                           |
| TCONS_00004285 | -0.063425  | 0.192859   | 0.200057   | BGIOSGA028004 | XP_002458398.1protein PLASTID MOVEMENT IMPAIRED 1-RELATED 1                  |
| TCONS_00004846 | -0.0633422 | -0.798525  | -0.37254   | BGIOSGA019894 | XP_015698050.1 zinc finger CCHC domain-containing protein 19-like isoform X1 |
| TCONS_00008934 | -0.0632862 | 0.903194   | 0.387151   | BGIOSGA022458 | XP_004954152.126S proteasome regulatory subunit 7A                           |
| TCONS_00024047 | -0.0632279 | -0.104619  | -0.42049   | BGIOSGA000233 | XP_006657925.1 histone deacetylase 5 isoform X1                              |
| TCONS_00013306 | -0.0629593 | 0.268128   | 0.960923   | BGIOSGA007229 | XP_006651762.1PREDICTED: uncharacterized protein LOC102720419 isoform X1     |
| TCONS_00012095 | -0.0629312 | 0.247069   | -0.0564944 | BGIOSGA019642 | XP_003558119.1uncharacterized protein LOC100845835                           |
| TCONS_00009501 | -0.0628905 | 0.315587   | 0.422997   | BGIOSGA003763 | XP_006649567.1 serine--tRNA ligase                                           |
| TCONS_00003796 | -0.0626043 | -0.0141806 | -0.160002  | #N/A          | #N/A                                                                         |
| TCONS_00007412 | -0.062476  | -0.248944  | -0.960436  | BGIOSGA007062 | XP_015688467.1 peptidyl-prolyl cis-trans isomerase FKBP17-1, chloroplastic   |
| TCONS_00009652 | -0.0622106 | 0.154713   | -1.07067   | BGIOSGA012197 | XP_006649700.1 anaphase-promoting complex subunit 6                          |
| TCONS_00005422 | -0.0621376 | 0.484327   | 0.719223   | BGIOSGA001292 | XP_006646877.2 splicing factor 3B subunit 1                                  |
| TCONS_00023205 | -0.0621034 | -0.540433  | 0.259726   | BGIOSGA035519 | XP_006658331.1 ETO1-like protein 1                                           |
| TCONS_00035979 | -0.0620325 | #N/A       | -2.67776   | BGIOSGA035291 | XP_002442723.1cucurbit peeling cupredoxin                                    |
| TCONS_00000294 | -0.0619864 | 1.68024    | -0.27026   | BGIOSGA023095 | XP_015699259.1 ABC transporter C family member 3-like                        |
| TCONS_00007060 | -0.0619684 | 1.40747    | 0.576442   | BGIOSGA023119 | XP_004954284.1GATA transcription factor 8                                    |
| TCONS_00033703 | -0.0618734 | 0.232717   | 0.02214    | BGIOSGA035512 | XP_006663539.1 polycypene isomerase, chloroplastic                           |
| TCONS_00037524 | -0.0617347 | 0.819158   | 0.163476   | BGIOSGA035842 | XP_015698393.1 histone-lysine N-methyltransferase ATXR7-like isoform X1      |
| TCONS_00036761 | -0.0615033 | -2.37712   | -2.00059   | BGIOSGA007161 | XP_015698834.1 CBS domain-containing protein CBSCBSPB3-like                  |
| TCONS_00018206 | -0.0614766 | -0.878784  | 0.239022   | BGIOSGA032728 | XP_021303107.1myosin-17 isoform X4                                           |
| TCONS_00002793 | -0.0613124 | -0.227591  | 0.306662   | BGIOSGA023090 | XP_006643735.1 protein DAMAGED DNA-BINDING 2                                 |
| TCONS_00008708 | -0.0611818 | 0.0170391  | -0.129292  | BGIOSGA002744 | XP_006647806.1 protein ASPARTIC PROTEASE IN GUARD CELL 2-like                |
| TCONS_00033827 | -0.0610649 | -1.27062   | -0.464252  | BGIOSGA019356 | XP_002449840.1RING-H2 finger protein ATL51                                   |
| TCONS_00021342 | -0.0610161 | 0.592155   | -0.346834  | BGIOSGA004046 | XP_015693703.1 glycosyltransferase family 64 protein C4                      |
| TCONS_00027138 | -0.0608739 | 0.534409   | -0.294188  | BGIOSGA031291 | XP_006659687.1 histidine-containing phosphotransfer protein 1                |
| TCONS_00031533 | -0.0606773 | 0.34573    | 0.0238125  | BGIOSGA028018 | XP_006662544.2 mitogen-activated protein kinase 6                            |
| TCONS_00016879 | -0.0605848 | -0.324119  | -0.0848704 | BGIOSGA020130 | XP_006653882.2 putative serine/threonine-protein kinase                      |
| TCONS_00010122 | -0.0605492 | 0.406902   | 0.566808   | BGIOSGA026779 | XP_006651407.1 probable protein S-acyltransferase 17                         |
| TCONS_00019529 | -0.0605436 | 0.433321   | -0.127343  | BGIOSGA025407 | XP_006654560.1 60S ribosomal protein L24-like                                |
| TCONS_00013052 | -0.0603037 | 0.916327   | 0.214137   | BGIOSGA009937 | XP_006650487.1 coatomer subunit alpha-3 isoform X1                           |
| TCONS_00021869 | -0.0602288 | 1.66516    | 1.06625    | BGIOSGA021651 | XP_003564074.1serine/threonine-protein phosphatase 2A activator              |
| TCONS_00032754 | -0.0600398 | -0.0169245 | -2.7513    | BGIOSGA033586 | XP_006662095.2AT-hook motif nuclear-localized protein 10-like                |
| TCONS_00007256 | -0.0600002 | -0.379204  | 0.66113    | BGIOSGA007227 | XP_015688433.1 glutamate--tRNA ligase, chloroplastic/mitochondrial           |
| TCONS_00001677 | -0.0599609 | -0.0895776 | -0.903518  | BGIOSGA021014 | XP_015699086.1 V-type proton ATPase subunit B 2-like isoform X1              |
| TCONS_00001863 | -0.0596428 | -1.01568   | -0.17442   | BGIOSGA004497 | XP_006644745.2 malonate--CoA ligase isoform X1                               |

## transcriptome

|                |            |            |            |               |                                                                                          |
|----------------|------------|------------|------------|---------------|------------------------------------------------------------------------------------------|
| TCONS_00008455 | -0.0593323 | -0.633958  | -1.32005   | BGIOSGA015984 | XP_006647577.1 alcohol dehydrogenase-like 6                                              |
| TCONS_00030664 | -0.0592197 | -4.65803   | -2.67321   | BGIOSGA008257 | XP_002464781.1 acyl transferase 1<br>XP_006649658.2 nuclear pore complex protein NUP155  |
| TCONS_00020579 | -0.0591805 | -0.0669786 | 0.10796    | BGIOSGA017093 | XP_015694128.1 uncharacterized membrane protein At1g06890-like                           |
| TCONS_00022311 | -0.0591151 | -6.42387   | -1.7677    | BGIOSGA004708 | XP_006660649.1 beta-1,3-galactosyltransferase 6-like                                     |
| TCONS_00030095 | -0.0590914 | -0.499831  | -0.0966944 | BGIOSGA029707 | XP_004977101.1 dihydriolipoyl dehydrogenase, mitochondrial                               |
| TCONS_00017183 | -0.0590373 | -0.0787745 | -0.110727  | BGIOSGA013257 | NP_001278542.1 COX VIIa-like protein                                                     |
| TCONS_00024223 | -0.05903   | -0.726633  | -0.2824    | BGIOSGA007081 | XP_006656264.1 AT-rich interactive domain-containing protein 5-like                      |
| TCONS_00021055 | -0.0588786 | 0.617267   | 0.221446   | BGIOSGA005739 | XP_006643745.1 PREDICTED: uncharacterized protein At3g49720-like isoform X1              |
| TCONS_00002804 | -0.0588325 | -0.0967472 | 0.351744   | BGIOSGA029066 | XP_015689705.1 PREDICTED: uncharacterized protein LOC102706542 isoform X3                |
| TCONS_00009416 | -0.0586458 | -1.45154   | -0.355945  | BGIOSGA011969 | XP_006664576.1 PREDICTED: uncharacterized protein LOC102709234, partial                  |
| TCONS_00037227 | -0.0583791 | -1.06207   | -1.04208   | BGIOSGA036147 | XP_015698382.1 PREDICTED: uncharacterized protein LOC102706435                           |
| TCONS_00036499 | -0.0581428 | 0.662543   | -0.173371  | BGIOSGA037868 | XP_024318338.1 uncharacterized protein LOC100830018                                      |
| TCONS_00014840 | -0.0581173 | -0.755846  | 0.0911436  | BGIOSGA008840 | XP_006649638.1 pentatricopeptide repeat-containing protein At4g16390, chloroplastic      |
| TCONS_00011792 | -0.0579499 | 0.549827   | 0.219818   | BGIOSGA037353 | XP_006651990.1 probable RNA 3'-terminal phosphate cyclase-like protein                   |
| TCONS_00013488 | -0.0578853 | 0.380312   | 1.2847     | BGIOSGA009503 | XP_021316190.1 ATPase 10, plasma membrane-type isoform X2                                |
| TCONS_00005156 | -0.0578571 | -2.33038   | -0.567046  | BGIOSGA018305 | XP_012698366.1 cationic amino acid transporter 2, vacuolar                               |
| TCONS_00012845 | -0.057773  | 0.597432   | -0.0276216 | BGIOSGA010127 | XP_006647973.2 separase                                                                  |
| TCONS_00012917 | -0.0576941 | -1.19685   | 0.624661   | BGIOSGA032572 | XP_002456892.1 uncharacterized protein LOC8059401                                        |
| TCONS_00002462 | -0.0576547 | 0.640332   | 0.490208   | BGIOSGA005307 | XP_006657624.1 nuclear pore complex protein NUP54                                        |
| TCONS_00023505 | -0.0576511 | -0.501647  | 0.5164     | BGIOSGA031001 | XP_006653313.2 60S ribosomal protein L35                                                 |
| TCONS_00015743 | -0.0573822 | 0.0788356  | -0.0777917 | BGIOSGA008264 | XP_003562767.1 cysteine proteinase inhibitor 8                                           |
| TCONS_00010346 | -0.0573822 | 1.85474    | 1.04944    | BGIOSGA011234 | XP_003557839.1 calcium/calmodulin-dependent serine/threonine-protein kinase 1 isoform X2 |
| TCONS_00010132 | -0.0573415 | 0.449953   | 0.556276   | BGIOSGA007434 | XP_006660144.2 vacuolar fusion protein CCZ1 homolog                                      |
| TCONS_00026635 | -0.0571756 | -0.365841  | -0.269575  | BGIOSGA011244 | XP_015692488.1 macrophage erythroblast attacher                                          |
| TCONS_00017184 | -0.0570687 | -0.109795  | 0.201195   | BGIOSGA021093 | XP_015690283.1 PREDICTED: uncharacterized protein LOC102701624                           |
| TCONS_00012281 | -0.0568166 | 0.944872   | 0.571559   | BGIOSGA009630 | XP_015689744.1 COP9 signalosome complex subunit 1                                        |
| TCONS_00011451 | -0.0568166 | 0.0693845  | 0.423731   | BGIOSGA011573 | XP_006654284.1 PREDICTED: uncharacterized protein LOC102717247                           |
| TCONS_00017605 | -0.0566531 | 0.996208   | 0.336196   | BGIOSGA019664 | XP_006656539.1 homogentisate 1,2-dioxygenase                                             |
| TCONS_00021438 | -0.0565027 | 0.0672243  | 1.12675    | BGIOSGA022113 | XP_006644461.1 PREDICTED: uncharacterized protein LOC102713683                           |
| TCONS_00018458 | -0.0564841 | 0.27349    | -0.404038  | BGIOSGA002575 | XP_015689509.1 vacuolar protein sorting-associated protein 45 homolog                    |
| TCONS_00007928 | -0.0563074 | -0.814364  | -0.520111  | BGIOSGA006558 | XP_008645668.1 UDP-glycosyltransferase 73C3                                              |
| TCONS_00007578 | -0.0563022 | 0.089612   | 0.223119   | BGIOSGA029561 | XP_006663817.1 DEAD-box ATP-dependent RNA helicase 52B                                   |
| TCONS_00035577 | -0.0560245 | 0.905322   | 1.78323    | BGIOSGA034798 | XP_006650088.1 ribosomal RNA-processing protein 17                                       |
| TCONS_00010083 | -0.0557269 | -0.477286  | 0.0261397  | BGIOSGA012629 | XP_006644993.1 laccase-4                                                                 |
| TCONS_00004706 | -0.0556539 | -5.99601   | -3.42714   | BGIOSGA024987 | XP_006660246.1 elongator complex protein 2                                               |
| TCONS_00026855 | -0.0555919 | 0.374566   | 0.87498    | BGIOSGA028909 | XP_006646776.1 60S ribosomal protein L37-1-like                                          |
| TCONS_00025854 | -0.0554156 | 0.0271586  | -0.415934  | BGIOSGA009278 | XP_006661897.1 alpha-galactosidase                                                       |
| TCONS_00031376 | -0.0550972 | -0.947913  | 1.30066    | BGIOSGA010707 | XP_006660601.1 probable plastidic glucose transporter 1 isoform X2                       |
| TCONS_00028951 | -0.0548862 | -1.35063   | -0.0757493 | BGIOSGA033375 | XP_006659315.2 protein ENHANCED DOWNY MILDEW 2-like isoform X1                           |
| TCONS_00026416 | -0.0547029 | -0.49013   | 0.136285   | BGIOSGA003622 | XP_006662240.1 PREDICTED: uncharacterized protein LOC102705752                           |
| TCONS_00030830 | -0.0545343 | -1.22682   | -0.199242  | BGIOSGA036596 | XP_023157549.1 uncharacterized protein LOC103646630                                      |
| TCONS_00005343 | -0.0543217 | -1.37214   | 0.402652   | BGIOSGA018630 | XP_006647364.1 probable L-ascorbate peroxidase 8, chloroplastic                          |
| TCONS_00008171 | -0.0539614 | -0.095855  | 0.527425   | BGIOSGA036534 | XP_006645092.2 probable magnesium transporter NIPA6                                      |
| TCONS_00002264 | -0.0538633 | 0.7344     | 0.463108   | BGIOSGA014027 | XP_006656744.2 mechanosensitive ion channel protein 10                                   |
| TCONS_00021811 | -0.0538305 | 0.890716   | -0.113207  | BGIOSGA021702 | XP_006654646.1 transcription factor VOZ1-like                                            |
| TCONS_00019632 | -0.0535696 | -0.126376  | 0.258601   | BGIOSGA000815 | XP_015688705.1 shikimate O-hydroxycinnamoyltransferase-like                              |
| TCONS_00027053 | -0.0533246 | -2.10926   | -2.70815   | BGIOSGA029102 | XP_015696723.1 putative disease resistance protein RGA3                                  |
| TCONS_00031043 | -0.0532293 | -0.41178   | -0.0135399 | BGIOSGA034004 | XP_006660166.1 omega-6 fatty acid desaturase, chloroplastic                              |
| TCONS_00028074 | -0.0531787 | -0.683633  | -0.632117  | BGIOSGA026918 | XP_024315197.1 receptor-like cytoplasmic kinase 185 isoform X2                           |
| TCONS_00017676 | -0.0531264 | -0.157178  | 0.311998   | BGIOSGA002441 | XP_015688185.1 methyltransferase-like protein 1                                          |
| TCONS_00000632 | -0.0531174 | 0.78602    | 0.914641   | BGIOSGA026793 | XP_022679705.1 uncharacterized protein LOC111256259                                      |
| TCONS_00024493 | -0.0530519 | 1.34983    | 0.991612   | BGIOSGA032295 | XP_015694686.1 mini-chromosome maintenance complex-binding protein                       |
| TCONS_00002901 | -0.0529797 | -1.67425   | -0.73232   | BGIOSGA002318 |                                                                                          |

## transcriptome

|                |            |            |            |               |                                                                                                  |
|----------------|------------|------------|------------|---------------|--------------------------------------------------------------------------------------------------|
| TCONS_00013295 | -0.0529458 | -0.109733  | -0.249659  | BGIOSGA035815 | XP_006650700.1 protein IQ-DOMAIN 1-like isoform X1                                               |
| TCONS_00030324 | -0.0529201 | 0.0277379  | 0.968918   | BGIOSGA029484 | XP_015696546.1 PREDICTED: uncharacterized protein LOC102721954                                   |
| TCONS_00019909 | -0.0527865 | 0.691591   | 0.394951   | BGIOSGA037444 | XP_015692994.1 eukaryotic translation initiation factor 5B-like                                  |
| TCONS_00012329 | -0.0527376 | -1.49081   | 0.340789   | BGIOSGA026221 | XP_006650123.1 novel plant SNARE 12-like isoform X2                                              |
| TCONS_00010052 | -0.0526133 | 1.01487    | 0.726875   | BGIOSGA010714 | XP_006650063.1 U3 small nucleolar RNA-associated protein 14-like                                 |
| TCONS_00031380 | -0.0524724 | -1.83044   | 0.25051    | #N/A          | XP_015697222.1 PREDICTED: uncharacterized protein LOC102708649 isoform X2                        |
| TCONS_00012187 | -0.0524286 | 0.474579   | 0.334024   | BGIOSGA010818 | XP_015690293.1 U11/U12 small nuclear ribonucleoprotein 65 kDa protein                            |
| TCONS_00006956 | -0.0523979 | 0.361006   | 0.259856   | BGIOSGA009181 | XP_006649094.2 isoleucine--tRNA ligase, chloroplastic/mitochondrial                              |
| TCONS_00015073 | -0.0520886 | 0.661039   | 0.394149   | BGIOSGA026901 | XP_015691599.1 D-3-phosphoglycerate dehydrogenase 1, chloroplastic-like                          |
| TCONS_00009933 | -0.0517694 | -0.535093  | 0.260572   | BGIOSGA019269 | XP_006649975.1 probable enoyl-CoA hydratase 1, peroxisomal                                       |
| TCONS_00011529 | -0.0517607 | -0.227155  | 0.374891   | BGIOSGA011501 | XP_006649353.2 F-box/LRR-repeat protein 10                                                       |
| TCONS_00017611 | -0.0517428 | 1.42221    | 0.230619   | BGIOSGA010932 | XP_006654281.1 importin subunit beta-1-like                                                      |
| TCONS_00007532 | -0.0516575 | 0.486328   | 0.569582   | BGIOSGA002970 | XP_003571257.1 outer envelope protein 80, chloroplastic                                          |
| TCONS_00005374 | -0.0516435 | 0.344746   | 0.262423   | BGIOSGA020570 | XP_015689577.1 PREDICTED: uncharacterized protein LOC102704209 isoform X1                        |
| TCONS_00021721 | -0.0516134 | 0.375858   | 0.650186   | BGIOSGA021800 | XP_006656700.1 protein NUCLEAR FUSION DEFECTIVE 4                                                |
| TCONS_00038464 | -0.0513281 | -3.2373    | -2.97612   | BGIOSGA030641 | NP_001131192.1 retrotransposon protein precursor                                                 |
| TCONS_00014955 | -0.0512182 | 0.643576   | 0.537141   | BGIOSGA017142 | XP_006652836.1 OTU domain-containing protein 6B                                                  |
| TCONS_00003131 | -0.0511513 | 1.60867    | -1.81626   | BGIOSGA033988 | XP_015699148.1 mitochondrial arginine transporter BAC2                                           |
| TCONS_00013067 | -0.0511303 | 0.957067   | 1.57412    | BGIOSGA009915 | XP_003570580.1 splicing factor SF3a60 homolog                                                    |
| TCONS_00012554 | -0.0511014 | 1.31115    | -0.0799618 | BGIOSGA016743 | XP_006650252.1 probable dolichyl-diphosphooligosaccharide--protein glycosyltransferase subunit 3 |
| TCONS_00002583 | -0.05104   | -0.80265   | 0.606554   | BGIOSGA005226 | XP_024312259.1 uncharacterized protein LOC100842716                                              |
| TCONS_00028471 | -0.050985  | -0.0731765 | 0.58198    | BGIOSGA026485 | XP_015695874.1 dnaJ homolog subfamily C member 28-like                                           |
| TCONS_00003564 | -0.0506964 | 0.0754691  | -0.157267  | BGIOSGA001638 | XP_006644171.1 serine/arginine repetitive matrix protein 5-like                                  |
| TCONS_00025101 | -0.0505828 | 0.363239   | 0.487729   | BGIOSGA024299 | XP_006657705.1 PREDICTED: uncharacterized protein LOC102711274                                   |
| TCONS_00009124 | -0.0505721 | -0.585208  | -0.326586  | BGIOSGA031095 | XP_006649221.1 palmitoyl-protein thioesterase 1-like                                             |
| TCONS_00001300 | -0.0504235 | -0.305545  | -0.393388  | BGIOSGA015786 | XP_024318484.1 receptor-like protein EIX1                                                        |
| TCONS_00013269 | -0.0503944 | 0.259587   | -0.608908  | BGIOSGA011132 | XP_006650675.1 actin-depolymerizing factor 2                                                     |
| TCONS_00005290 | -0.0501632 | -0.575221  | 0.0529126  | BGIOSGA037541 | XP_015689664.1 metalloprotease A-like protein ARB_03789                                          |
| TCONS_00013588 | -0.0499961 | 0.189414   | -0.375959  | BGIOSGA007532 | XP_015690156.1 rhodanese-like domain-containing protein 8, chloroplastic                         |
| TCONS_00029321 | -0.0499923 | 0.0363535  | 0.563551   | BGIOSGA029064 | XP_015696781.1 pyruvate dehydrogenase E1 component subunit beta-2, mitochondrial                 |
| TCONS_00004475 | -0.0499726 | -0.68416   | -0.273129  | BGIOSGA010097 | XP_006644770.1 transmembrane protein 56-like                                                     |
| TCONS_00025042 | -0.0498632 | -0.500801  | 0.278928   | BGIOSGA024364 | XP_006658532.1 PREDICTED: uncharacterized protein slr1919                                        |
| TCONS_00026484 | -0.0496965 | 0.13218    | 0.703626   | BGIOSGA018629 | XP_023157549.1 uncharacterized protein LOC103646630                                              |
| TCONS_00009372 | -0.0496866 | 0.345609   | 0.321791   | BGIOSGA011923 | XP_015689774.1 putative ion channel POLLUX-like 2                                                |
| TCONS_00008978 | -0.0493475 | 0.215404   | 0.724531   | BGIOSGA005428 | XP_006648059.1 PREDICTED: uncharacterized protein LOC102702632                                   |
| TCONS_00018665 | -0.0493233 | -0.0368824 | -0.292725  | BGIOSGA007895 | XP_006654078.1 GDSL esterase/lipase LIP-4-like                                                   |
| TCONS_00031396 | -0.0491845 | -1.934     | -0.779583  | BGIOSGA007810 | XP_006661911.1 probable receptor-like protein kinase At2g42960                                   |
| TCONS_00005004 | -0.0491813 | -0.0390254 | 0.247377   | BGIOSGA000217 | XP_006646634.2 trisaldolase                                                                      |
| TCONS_00005695 | -0.048961  | -0.0776956 | 0.937704   | BGIOSGA007817 | XP_006648470.1 xaa-Pro dipeptidase                                                               |
| TCONS_00027241 | -0.0486486 | 0.727527   | 0.697954   | BGIOSGA027762 | XP_006659058.1 squamous cell carcinoma antigen recognized by T-cells 3                           |
| TCONS_00007126 | -0.0486392 | 0.749643   | 1.91201    | BGIOSGA009310 | XP_006648138.1 mediator of RNA polymerase II transcription subunit 36a-like                      |
| TCONS_00004944 | -0.0485408 | -1.21991   | -0.826251  | BGIOSGA000277 | XP_006646594.2 ABC transporter B family member 26, chloroplastic                                 |
| TCONS_00029542 | -0.048416  | -0.773265  | -0.577333  | BGIOSGA007606 | XP_015696570.1 PREDICTED: uncharacterized protein LOC102708365 isoform X1                        |
| TCONS_00037339 | -0.0479977 | -0.646212  | 0.371499   | BGIOSGA029804 | XP_002444474.1 protein trichome birefringence-like 16                                            |
| TCONS_00032640 | -0.0478521 | 0.21793    | 0.31443    | BGIOSGA031472 | XP_015697344.1 zinc finger protein GIS2-like                                                     |
| TCONS_00014134 | -0.0478304 | 0.679453   | -0.0964201 | BGIOSGA025327 | XP_021319649.1 ACT domain-containing protein ACR6-like                                           |
| TCONS_00009290 | -0.0478125 | 1.07637    | 0.52269    | BGIOSGA031734 | XP_006649384.1 60S ribosomal protein L21-1                                                       |
| TCONS_00029480 | -0.0476242 | -1.33751   | -1.67456   | BGIOSGA031234 | XP_006660953.1 PREDICTED: uncharacterized protein LOC102718768                                   |
| TCONS_00000851 | -0.0474462 | 0.32125    | 0.393242   | BGIOSGA008407 | XP_006644146.1 protein disulfide isomerase-like 2-2                                              |
| TCONS_00027552 | -0.0474135 | 0.205477   | -0.105055  | BGIOSGA014776 | XP_006659214.1 40S ribosomal protein S11-like                                                    |
| TCONS_00014889 | -0.04736   | 0.991868   | 0.684893   | BGIOSGA031510 | XP_006652780.1 60S ribosomal protein L7-3-like                                                   |
| TCONS_00008161 | -0.0473204 | 0.0248207  | -0.328305  | BGIOSGA006280 | XP_024318176.1 trafficking protein particle complex subunit 12                                   |

transcriptome

|                |            |             |            |               |                                                                                                   |
|----------------|------------|-------------|------------|---------------|---------------------------------------------------------------------------------------------------|
| TCONS_00015433 | -0.0472647 | 0.299049    | -0.735347  | BGIOSGA015598 | XP_006652106.1 G-type lectin S-receptor-like serine/threonine-protein kinase RLK1                 |
| TCONS_00013569 | -0.0471799 | -2.15924    | 0.246204   | BGIOSGA015775 | XP_006652043.1 probable carbohydrate esterase At4g34215                                           |
| TCONS_00015679 | -0.047178  | 0.432118    | 0.342374   | BGIOSGA008232 | XP_006652189.2 40S ribosomal protein S8-like XP_003580275.1 putative kinase-like protein TMKL1    |
| TCONS_00016365 | -0.0471751 | -0.560325   | -0.521311  | BGIOSGA003050 | XP_015698025.1 PREDICTED: uncharacterized protein LOC102711575 isoform X1                         |
| TCONS_00032854 | -0.0470592 | 0.109525    | 0.215286   | BGIOSGA034672 | XP_020401151.1 hornerin isoform X1                                                                |
| TCONS_00031990 | -0.0470436 | 0.298453    | 0.323988   | BGIOSGA012108 | XP_015690713.1 DEXH-box ATP-dependent RNA helicase DEXH3                                          |
| TCONS_00013176 | -0.047016  | 0.218096    | 0.118398   | BGIOSGA002654 | XP_006664219.2 dihydrofolate synthetase                                                           |
| TCONS_00037559 | -0.0466486 | -0.365591   | -0.19424   | BGIOSGA000219 | XP_015692106.1 eukaryotic translation initiation factor isoform 4G-1                              |
| TCONS_00016185 | -0.0464832 | 0.820076    | 0.757654   | BGIOSGA023011 | XP_003568712.1 uncharacterized protein LOC100836950                                               |
| TCONS_00018898 | -0.0463671 | -0.0317994  | -0.78578   | BGIOSGA018461 | XP_006663783.1 alpha-L-arabinofuranosidase 1-like                                                 |
| TCONS_00035512 | -0.0461758 | -0.54855    | 0.420798   | BGIOSGA010845 | XP_006647968.2 PREDICTED: uncharacterized protein LOC102700684 isoform X1                         |
| TCONS_00006933 | -0.045809  | 0.545016    | -0.024551  | BGIOSGA021698 | NP_001130533.1 lipid binding protein                                                              |
| TCONS_00027773 | -0.045728  | -2.15801    | 0.258593   | BGIOSGA027224 | XP_015693549.1 DNA oxidative demethylase ALKBH2                                                   |
| TCONS_00020540 | -0.0456122 | 0.0934973   | 0.695678   | BGIOSGA022711 | XP_006649964.2 probable glutamyl endopeptidase, chloroplastic                                     |
| TCONS_00009911 | -0.045536  | -0.269645   | -0.3858    | BGIOSGA026433 | XP_006651005.1 epidermal growth factor receptor substrate 15-like                                 |
| TCONS_00011502 | -0.0454616 | 0.317912    | 0.612044   | BGIOSGA011524 | XP_015693789.1 putative BPI/LBP family protein At1g04970                                          |
| TCONS_00022137 | -0.0452978 | -0.265727   | -0.682024  | BGIOSGA029564 | XP_004963300.1 xylose kinase                                                                      |
| TCONS_00034531 | -0.045286  | -0.273194   | 0.367099   | BGIOSGA026237 | XP_003558721.1 uncharacterized protein LOC100825547                                               |
| TCONS_00011637 | -0.0452405 | -0.642021   | 0.451288   | BGIOSGA030628 | XP_004963161.1 patatin-like protein 3                                                             |
| TCONS_00037512 | -0.0447581 | -2.84037    | -0.952476  | BGIOSGA006114 | XP_006654171.1 serine/threonine-protein kinase TOR                                                |
| TCONS_00017380 | -0.0447327 | 0.21679     | 0.497176   | BGIOSGA019441 | XP_010240474.1 G-type lectin S-receptor-like serine/threonine-protein kinase At1g11330 isoform X1 |
| TCONS_00016673 | -0.0443441 | -0.00402135 | 0.145125   | BGIOSGA012967 | XP_006658071.1 PREDICTED: uncharacterized protein LOC102721379                                    |
| TCONS_00025658 | -0.0443278 | -0.39445    | -0.208002  | BGIOSGA023764 | XP_015697974.1 CBL-interacting protein kinase 32                                                  |
| TCONS_00035526 | -0.0442625 | -0.233513   | -0.49567   | BGIOSGA036907 | XP_015692748.1 ADP-ribosylation factor 2 isoform X1                                               |
| TCONS_00019535 | -0.0442591 | -0.215539   | 0.675298   | BGIOSGA025403 | XP_006658913.1 thioredoxin reductase NTRC                                                         |
| TCONS_00024269 | -0.044191  | 0.0567581   | -0.366273  | BGIOSGA026313 | XP_015693211.1 keratin, type II cytoskeletal 5-like                                               |
| TCONS_00004855 | -0.0441518 | -0.664366   | 0.562306   | BGIOSGA024834 | XP_006652094.1 protein argonaute 4B                                                               |
| TCONS_00015336 | -0.0440311 | 0.157356    | 0.615142   | BGIOSGA024499 | XP_015692311.1 F-box protein 7 isoform X1                                                         |
| TCONS_00014284 | -0.0440205 | -0.246149   | -0.244275  | BGIOSGA016439 | XP_003561787.1 serine/threonine-protein kinase ATG1c isoform X1                                   |
| TCONS_00011974 | -0.0438226 | -0.535857   | 0.211706   | BGIOSGA011740 | XP_006646192.1 non-canonical poly(A) RNA polymerase PAPD5                                         |
| TCONS_00001552 | -0.0436766 | -0.185287   | 0.737699   | BGIOSGA004182 | XP_006659695.1 multiple myeloma tumor-associated protein 2 homolog                                |
| TCONS_00028465 | -0.043645  | -0.0981671  | 0.17833    | BGIOSGA026490 | XP_015696083.1 afadin- and alpha-actinin-binding protein-like isoform X2                          |
| TCONS_00027629 | -0.0435525 | 0.0841104   | -0.675359  | BGIOSGA027390 | XP_006653627.1 probable metal-nicotinamine transporter YSL9                                       |
| TCONS_00016336 | -0.04353   | -0.425452   | -0.872611  | BGIOSGA005930 | XP_006649802.1 coronatine-insensitive protein homolog 2                                           |
| TCONS_00009735 | -0.0433911 | 0.199818    | 0.272447   | BGIOSGA019953 | XP_006657397.1 serine/arginine repetitive matrix protein 2                                        |
| TCONS_00022983 | -0.0433738 | 0.107828    | 0.470822   | BGIOSGA008138 | XP_006650007.1 WRKY transcription factor 44-like                                                  |
| TCONS_00009971 | -0.043256  | -0.117977   | -0.208706  | BGIOSGA000583 | XP_006647719.1 uncharacterized membrane protein At4g09580                                         |
| TCONS_00008620 | -0.0432139 | -1.15871    | -2.12833   | BGIOSGA013408 | XP_010940064.1 glutamate dehydrogenase 1, mitochondrial isoform X2                                |
| TCONS_00013328 | -0.0430065 | -0.331614   | -1.12032   | BGIOSGA008724 | XP_003558129.1 mitoferrin isoform X1                                                              |
| TCONS_00009868 | -0.0429752 | -0.446567   | -1.57169   | BGIOSGA005021 | XP_015692701.1 fasciclin-like arabinogalactan protein 12                                          |
| TCONS_00018308 | -0.042968  | -4.28344    | -2.16174   | BGIOSGA002349 | XP_006652492.1 protein LOW PSII ACCUMULATION 1, chloroplastic isoform X2                          |
| TCONS_00016215 | -0.042935  | -1.30397    | -1.65899   | BGIOSGA002157 | XP_006650900.1 random slug protein 5-like                                                         |
| TCONS_00013543 | -0.0428818 | -0.945405   | -0.940972  | BGIOSGA005094 | XP_006655483.2 proline iminopeptidase                                                             |
| TCONS_00019627 | -0.042759  | -0.137518   | -1.1859    | BGIOSGA017731 | XP_006648044.2 formin-like protein 7                                                              |
| TCONS_00008961 | -0.0426273 | -0.0356976  | -0.0462932 | BGIOSGA023968 | XP_006650027.1 endoglucanase 9                                                                    |
| TCONS_00012195 | -0.0422452 | 0.279164    | 0.340315   | BGIOSGA021512 | XP_006656686.2 AP-1 complex subunit gamma-2-like isoform X1                                       |
| TCONS_00020191 | -0.0421621 | 0.100637    | 0.422594   | BGIOSGA005409 | XP_015696231.1 protein CROWDED NUCLEI 3                                                           |
| TCONS_00028298 | -0.0419637 | 0.192471    | 0.62896    | BGIOSGA026681 | XP_006658053.2 TVP38/TMEM64 family membrane protein slr0305                                       |
| TCONS_00024260 | -0.0418545 | -1.01573    | -0.353912  | BGIOSGA026302 | XP_006648646.2 transcriptional activator DEMETER-like isoform X1                                  |
| TCONS_00006096 | -0.0418484 | -0.59922    | 1.16001    | BGIOSGA006439 | XP_004985506.1 copper-transporting ATPase PAA2, chloroplastic                                     |
| TCONS_00011666 | -0.0418037 | -0.998611   | -1.19712   | BGIOSGA020639 | XP_006662072.1 mediator of RNA polymerase II transcription subunit 31                             |
| TCONS_00032718 | -0.0417676 | -0.805174   | 0.717153   | BGIOSGA025202 | XP_016649378.1 B2 protein                                                                         |
| TCONS_00019572 | -0.0416654 | -0.307992   | 0.338896   | BGIOSGA017785 | XP_015689404.1 mitogen-activated protein kinase 13 isoform X1                                     |
| TCONS_00007313 | -0.0416028 | -0.243435   | 0.00494861 | BGIOSGA006577 |                                                                                                   |

transcriptome

|                |            |             |            |               |                                                                                          |
|----------------|------------|-------------|------------|---------------|------------------------------------------------------------------------------------------|
| TCONS_00005368 | -0.0415396 | 0.0983684   | 0.395      | BGIOSGA014171 | XP_004951961.1myb-binding protein 1A-like protein                                        |
| TCONS_00003967 | -0.0413407 | -3.2078     | -2.7985    | BGIOSGA008891 | XP_002458146.1thrombospondin type-1 domain-containing protein 4                          |
| TCONS_00024972 | -0.0411784 | -1.15738    | -0.652065  | BGIOSGA024422 | NP_001151489.1F-actin capping protein alpha subunit                                      |
| TCONS_00032156 | -0.0410081 | 0.501226    | 0.36977    | BGIOSGA028040 | XP_015697387.1 F-box/LRR-repeat protein 15                                               |
| TCONS_00029854 | -0.0407145 | 0.227491    | 0.287643   | BGIOSGA002266 | XP_004956611.1ABC transporter G family member 53                                         |
| TCONS_00032581 | -0.0407096 | -0.146897   | 0.428496   | BGIOSGA009182 | XP_006661969.1 probable E3 ubiquitin-protein ligase XBOS33                               |
| TCONS_00004479 | -0.0406898 | 0.250484    | 0.20654    | BGIOSGA003162 | XP_003569912.1F-box protein At4g18380                                                    |
| TCONS_00016598 | -0.0406477 | -0.251218   | -0.460533  | BGIOSGA007321 | XP_003580529.1coatomer subunit epsilon-1                                                 |
| TCONS_00018205 | -0.0403592 | 2.13081     | 0.722593   | BGIOSGA017690 | XP_006654710.1 probable WRKY transcription factor 26                                     |
| TCONS_00024681 | -0.0400625 | 1.60386     | -0.071513  | BGIOSGA024703 | XP_024313011.1ylmG homolog protein 1-2, chloroplastic                                    |
| TCONS_00008053 | -0.0400302 | 0.582855    | 0.785868   | BGIOSGA006402 | XP_015698022.1 SART-1 family protein DOT2 isoform X1                                     |
| TCONS_00027978 | -0.0400241 | 1.79054     | 0.590506   | BGIOSGA027018 | XP_015695855.1 pre-mRNA cleavage factor Im 25 kDa subunit 1-like                         |
| TCONS_00037280 | -0.039939  | -0.380854   | 0.77013    | BGIOSGA036093 | XP_006664063.1PREDICTED: uncharacterized protein LOC102708390                            |
| TCONS_00001243 | -0.0399144 | 0.106582    | 0.0606942  | BGIOSGA035841 | XP_006644322.1 single myb histone 2-like isoform X1                                      |
| TCONS_00023552 | -0.0398528 | 0.398516    | -0.289892  | BGIOSGA006754 | XP_015695131.1 protein TSS-like                                                          |
| TCONS_00007921 | -0.0398256 | -0.272907   | 0.247708   | BGIOSGA032925 | NP_001151182.1protein transporter                                                        |
| TCONS_00015795 | -0.0397092 | 0.545032    | 1.57822    | BGIOSGA039198 | XP_015691715.1 DNA-directed RNA polymerase III subunit rpo4                              |
| TCONS_00027464 | -0.0393811 | -0.541338   | 0.155487   | BGIOSGA027550 | XP_006659891.1 mRNA cap guanine-N7 methyltransferase 1                                   |
| TCONS_00011709 | -0.0391844 | -0.0402772  | -0.850827  | BGIOSGA011301 | XP_004985391.1probable mitochondrial adenine nucleotide transporter BTL3                 |
| TCONS_00034966 | -0.0391361 | 0.00927571  | -0.642801  | BGIOSGA033884 | XP_015697853.1PREDICTED: uncharacterized protein LOC102705960                            |
| TCONS_00007629 | -0.0391071 | -1.69164    | -0.851737  | BGIOSGA011717 | XP_006661972.1 F-box protein PP2-A13-like                                                |
| TCONS_00021064 | -0.039085  | 1.16368     | -0.0731793 | BGIOSGA035191 | XP_015693395.1PREDICTED: uncharacterized protein LOC102704621 isoform X1                 |
| TCONS_00008792 | -0.0390729 | 0.496206    | 1.17247    | BGIOSGA005644 | XP_015688965.1 protein LSM12 homolog                                                     |
| TCONS_00020779 | -0.0389211 | 0.58757     | 1.09739    | BGIOSGA012884 | XP_006660073.1 nucleolar complex protein 3 homolog                                       |
| TCONS_00008258 | -0.0388684 | 0.959005    | 0.195291   | BGIOSGA014922 | XP_015688650.1PREDICTED: uncharacterized protein LOC102716382                            |
| TCONS_00021832 | -0.0388684 | -0.51048    | -0.104269  | BGIOSGA021686 | XP_004964897.1protein TIC 22, chloroplastic                                              |
| TCONS_00013976 | -0.0388174 | 0.646997    | 0.718726   | BGIOSGA014629 | XP_006660481.1 cyclin-P4-1-like                                                          |
| TCONS_00011480 | -0.0386774 | -0.333474   | 0.445163   | BGIOSGA033347 | XP_012698377.1C-terminal binding protein AN                                              |
| TCONS_00000625 | -0.0383826 | 0.646446    | 0.894516   | BGIOSGA003208 | XP_015698686.1 pre-mRNA-splicing factor SPF27 homolog                                    |
| TCONS_00013868 | -0.0382993 | 0.0989432   | 0.018503   | BGIOSGA018578 | XP_006652006.1 BTB/POZ domain-containing protein At2g13690-like                          |
| TCONS_00029063 | -0.038173  | -0.42371    | -0.343178  | BGIOSGA030810 | XP_015696362.1 pentatricopeptide repeat-containing protein At5g10690                     |
| TCONS_00013482 | -0.0381527 | 0.263961    | 1.27597    | BGIOSGA009509 | XP_015690138.1 phosphoribosylformylglycinamide cyclo-ligase, chloroplastic/mitochondrial |
| TCONS_00016570 | -0.0380816 | -0.104764   | 0.408772   | BGIOSGA028240 | XP_006652780.1 60S ribosomal protein L7-3-like                                           |
| TCONS_00022668 | -0.0379415 | -1.47092    | 0.152601   | BGIOSGA000252 | XP_004965715.1chaperone protein dnaJ 8, chloroplastic                                    |
| TCONS_00018958 | -0.0378921 | 0.499655    | 1.66155    | BGIOSGA018405 | XP_015692965.1PREDICTED: uncharacterized protein LOC102720606                            |
| TCONS_00007622 | -0.0377679 | 0.00567954  | 0.186479   | BGIOSGA023102 | XP_015689436.1 glycine-rich RNA-binding protein 3, mitochondrial-like                    |
| TCONS_00026838 | -0.0377436 | -2.21234    | 0.362405   | BGIOSGA027198 | XP_004973769.1fascilin-like arabinogalactan protein 1                                    |
| TCONS_00028509 | -0.0375811 | -0.656626   | -0.258129  | BGIOSGA030262 | XP_015696900.1PREDICTED: uncharacterized protein LOC102720903                            |
| TCONS_00009235 | -0.0375368 | -1.05019    | -0.950436  | BGIOSGA023834 | XP_019709773.1 calcium-dependent protein kinase 5 isoform X2                             |
| TCONS_00022606 | -0.0375022 | -0.181162   | -1.17453   | BGIOSGA020832 | XP_006656272.1 tryptophan synthase beta chain 2 isoform X1                               |
| TCONS_00004919 | -0.0374768 | -2.12522    | -0.678903  | BGIOSGA000304 | XP_006645188.1 two-component response regulator ORR26                                    |
| TCONS_00009618 | -0.0374419 | -0.00220393 | -0.453943  | BGIOSGA025345 | XP_006649665.1 coatomer subunit gamma-1                                                  |
| TCONS_00010599 | -0.0374318 | 0.621541    | 0.295065   | BGIOSGA013221 | XP_015690689.1 DNA-directed RNA polymerase II subunit RPB2 isoform X3                    |
| TCONS_00004765 | -0.0374236 | -0.364542   | 0.433517   | BGIOSGA000450 | XP_015699264.1 F-box/LRR-repeat protein At1g67190                                        |
| TCONS_00037385 | -0.0372968 | 1.03502     | 0.99872    | BGIOSGA035986 | XP_006664651.2 UNC93-like protein 3 isoform X1                                           |
| TCONS_00032486 | -0.0369142 | -0.904453   | 0.538555   | BGIOSGA019154 | XP_006661896.2PREDICTED: uncharacterized protein LOC102708090                            |
| TCONS_00006979 | -0.0368395 | 0.137125    | 0.0732618  | BGIOSGA020339 | XP_006648023.1 60S ribosomal protein L35a-1-like                                         |
| TCONS_00004159 | -0.036731  | -0.0188924  | -0.565754  | BGIOSGA001088 | XP_004969503.1ubiquitin-conjugating enzyme E2 36                                         |
| TCONS_00011636 | -0.0365959 | -0.00619759 | 0.445176   | BGIOSGA030832 | XP_006649467.1 50S ribosomal protein L18                                                 |
| TCONS_00032143 | -0.0365632 | -0.31503    | 0.0335799  | BGIOSGA031995 | XP_015697358.1 signal peptide peptidase-like 1                                           |
| TCONS_00017744 | -0.0365337 | -0.788335   | -0.0155949 | BGIOSGA019806 | XP_015692586.1 mannosylglycoprotein endo-beta-mannosidase                                |
| TCONS_00030303 | -0.0364054 | -1.10134    | 0.117844   | BGIOSGA035508 | XP_004957254.1uncharacterized protein LOC101756298                                       |
| TCONS_00033296 | -0.0362679 | -3.34984    | -1.59745   | BGIOSGA030469 | XP_003577653.4protein NRT1/ PTR FAMILY 4.5                                               |
| TCONS_00002481 | -0.0362563 | 0.637072    | -0.332429  | BGIOSGA036737 | XP_006645297.1 serine/threonine-protein kinase CDL1-like                                 |

## transcriptome

|                |            |            |             |               |                                                                                          |
|----------------|------------|------------|-------------|---------------|------------------------------------------------------------------------------------------|
| TCONS_00028708 | -0.0362288 | 0.711488   | 0.0805172   | BGIOSGA006669 | XP_006660509.1PREDICTED: uncharacterized protein LOC102702593 isoform X1                 |
| TCONS_00004607 | -0.0359525 | 0.0508065  | 0.0360437   | BGIOSGA037495 | XP_006644889.1 vacuolar protein sorting-associated protein 36                            |
| TCONS_00018785 | -0.035825  | 0.592589   | 0.711264    | BGIOSGA022348 | XP_006655076.1 probable beta-1,3-galactosyltransferase 12                                |
| TCONS_00025791 | -0.035733  | 0.0111086  | -0.0623821  | BGIOSGA027855 | XP_006659035.1 TOM1-like protein 2                                                       |
| TCONS_00022911 | -0.0355633 | 0.850993   | 0.613317    | BGIOSGA020532 | XP_015693846.1 BRCA1-A complex subunit BRE                                               |
| TCONS_00022939 | -0.0353609 | -0.104797  | -0.26045    | BGIOSGA015140 | XP_006656510.2 1,4-alpha-glucan-branching enzyme, chloroplastic/amyloplastic             |
| TCONS_00011106 | -0.0353589 | -2.12859   | 0.597851    | BGIOSGA029210 | XP_003559345.1 probable glutamate carboxypeptidase PLA3 isoform X2                       |
| TCONS_00022810 | -0.0353147 | -1.36726   | -0.407673   | BGIOSGA023515 | XP_015693689.1 putative cysteine-rich receptor-like protein kinase 20                    |
| TCONS_00035037 | -0.0352777 | 0.00999956 | 1.007       | BGIOSGA033819 | XP_006662985.1PREDICTED: uncharacterized protein LOC102706141                            |
| TCONS_00021725 | -0.035229  | 1.03241    | -0.813778   | BGIOSGA003238 | XP_010227959.1hydroxyproline O-arabinosyltransferase 1                                   |
| TCONS_00026470 | -0.0351739 | -2.63062   | -1.22895    | BGIOSGA009997 | XP_015695839.1 protein tesmin/TSO1-like CXC 7                                            |
| TCONS_00032465 | -0.03512   | 0.784346   | 0.0685946   | BGIOSGA010653 | XP_006661882.1 E3 ubiquitin-protein ligase RING1-like                                    |
| TCONS_00028166 | -0.03512   | 0.722945   | -2.39901    | BGIOSGA024776 | XP_004973676.1probable carboxylesterase 5                                                |
| TCONS_00004376 | -0.0350816 | 0.135816   | 0.155339    | BGIOSGA000844 | XP_022682565.1casein kinase 1-like protein HD16                                          |
| TCONS_00026529 | -0.0349982 | 0.267275   | -0.165258   | BGIOSGA022413 | XP_004973352.2hydroxyproline O-galactosyltransferase HPGT1                               |
| TCONS_00014556 | -0.0349844 | -0.579465  | -0.0884365  | BGIOSGA008944 | XP_015691514.1 calcium uptake protein 1 homolog, mitochondrial-like                      |
| TCONS_00036636 | -0.0346975 | 0.201955   | 0.137009    | BGIOSGA036634 | XP_006662723.1 proteasome-associated protein ECM29 homolog isoform X2                    |
| TCONS_00017187 | -0.0346341 | 0.73793    | 0.0916377   | BGIOSGA018762 | XP_015692956.1PREDICTED: uncharacterized protein LOC107304245                            |
| TCONS_00019622 | -0.034505  | 0.275425   | 0.707989    | BGIOSGA017735 | XP_006655477.2 BAG family molecular chaperone regulator 8, chloroplastic                 |
| TCONS_00029780 | -0.0344911 | 0.527715   | -0.96761    | BGIOSGA030035 | XP_006660519.1 two pore potassium channel c-like                                         |
| TCONS_00017125 | -0.034467  | -0.101171  | 0.4235      | BGIOSGA019173 | XP_006654043.1 protease Do-like 2, chloroplastic                                         |
| TCONS_00011148 | -0.0344651 | 0.797159   | 0.403903    | BGIOSGA013847 | XP_015690709.1 RNA-binding protein 28 isoform X1                                         |
| TCONS_00017996 | -0.0343694 | -1.04667   | -2.23095    | BGIOSGA020044 | XP_015692632.1 WEB family protein At2g38370-like                                         |
| TCONS_00000437 | -0.0343044 | -0.658685  | -0.055257   | BGIOSGA014789 | XP_015692833.1 protein DJ-1 homolog B-like                                               |
| TCONS_00021001 | -0.0342912 | 1.97443    | 0.710541    | BGIOSGA035520 | XP_003563656.1EIN3-binding F-box protein 1                                               |
| TCONS_00009895 | -0.0342097 | -0.049041  | 0.12429     | BGIOSGA001803 | XP_004984650.1uncharacterized protein LOC101764593                                       |
| TCONS_00001947 | -0.0341798 | 0.768056   | 0.0905128   | BGIOSGA004586 | XP_015690165.1 pentatricopeptide repeat-containing protein At1g55890, mitochondrial-like |
| TCONS_00032683 | -0.0339485 | 0.308338   | 0.63476     | BGIOSGA036417 | XP_006662050.1 CCR4-NOT transcription complex subunit 1                                  |
| TCONS_00022524 | -0.0338873 | -0.253237  | -0.22705    | BGIOSGA020927 | XP_006656215.1 heme oxygenase 1, chloroplastic                                           |
| TCONS_00009201 | -0.0338542 | -1.89532   | -0.00982844 | BGIOSGA029108 | XP_006649284.2 hydroxymethylglutaryl-CoA synthase-like                                   |
| TCONS_00010889 | -0.0338232 | -5.53921   | -0.331833   | BGIOSGA008839 | XP_015690053.1 serine carboxypeptidase-like 7                                            |
| TCONS_00029831 | -0.0337927 | 0.274529   | 0.540217    | BGIOSGA004614 | XP_020404942.1uncharacterized protein LOC109944582                                       |
| TCONS_00019901 | -0.0336942 | -0.480482  | 0.182421    | BGIOSGA003944 | XP_006654862.1 AAA-ATPase At3g50940-like                                                 |
| TCONS_00012749 | -0.0336942 | 1.64053    | 1.43035     | BGIOSGA016262 | XP_006650335.1 U3 snoRNP-associated protein-like YAOH                                    |
| TCONS_00006077 | -0.0335995 | 0.709534   | -0.0298328  | BGIOSGA015295 | XP_006648644.2 40S ribosomal protein S8                                                  |
| TCONS_00004524 | -0.0334921 | 1.53026    | 0.674642    | BGIOSGA026827 | XP_003564362.1universal stress protein PHOS32                                            |
| TCONS_00017809 | -0.0334677 | -1.99534   | 0.181862    | BGIOSGA004651 | XP_004967662.1tubulin beta-5 chain                                                       |
| TCONS_00020760 | -0.0334423 | 0.623538   | -2.8182     | BGIOSGA024257 | XP_006656105.1 protein DETOXIFICATION 16-like                                            |
| TCONS_00010581 | -0.0334173 | -0.449063  | -0.0889675  | BGIOSGA013196 | XP_006659111.1 protein ALWAYS EARLY 2 isoform X3                                         |
| TCONS_00023969 | -0.033328  | -1.41055   | -1.59609    | BGIOSGA026000 | XP_015694700.1 glucan endo-1,3-beta-glucosidase 4-like                                   |
| TCONS_00013929 | -0.0332763 | 0.229694   | 0.0743096   | BGIOSGA016104 | XP_006652161.1 aminoacyl tRNA synthase complex-interacting multifunctional protein 1     |
| TCONS_00012087 | -0.0332281 | 1.1512     | 0.766232    | BGIOSGA024669 | XP_024313368.1probable mediator of RNA polymerase II transcription subunit 26c           |
| TCONS_00011312 | -0.0331375 | 0.858055   | 0.452884    | BGIOSGA013918 | XP_006650880.1 30S ribosomal protein S6 alpha, chloroplastic                             |
| TCONS_00015183 | -0.0330436 | -0.459072  | -0.635836   | BGIOSGA017365 | XP_006653037.1 probable allantoinase                                                     |
| TCONS_00030810 | -0.0330348 | -1.73339   | -0.0793839  | BGIOSGA032618 | NP_001150888.2CMV 1a interacting protein 1                                               |
| TCONS_00025334 | -0.0328645 | -1.55709   | -2.18478    | BGIOSGA011584 | XP_004958017.1uncharacterized protein LOC101785046                                       |
| TCONS_00019332 | -0.0327564 | -0.674305  | -2.08293    | BGIOSGA036073 | NP_001147922.2phenylalanine ammonia-lyase                                                |
| TCONS_00016445 | -0.0326962 | 0.325619   | -0.820043   | BGIOSGA000169 | XP_006652658.1 homeobox-leucine zipper protein ROC4                                      |
| TCONS_00023898 | -0.0326772 | 0.665316   | -0.183023   | BGIOSGA025931 | XP_015695124.1 eukaryotic translation initiation factor 4G isoform X1                    |
| TCONS_00026372 | -0.0322574 | -0.727782  | 0.797213    | BGIOSGA028442 | XP_015696134.1PREDICTED: uncharacterized protein LOC102719788 isoform X1                 |
| TCONS_00012397 | -0.0320379 | 0.10866    | -0.0232988  | BGIOSGA026152 | XP_015691130.1 protein WEAK CHLOROPLAST MOVEMENT UNDER BLUE LIGHT 1-like                 |
| TCONS_00008851 | -0.0320028 | -0.377607  | 0.441098    | BGIOSGA001286 | XP_006649069.1 cytoplasmic tRNA 2-thiolation protein 1                                   |
| TCONS_00029290 | -0.0317795 | -0.501032  | -0.0853353  | BGIOSGA031033 | XP_015696867.1 DNA topoisomerase 3-beta                                                  |

transcriptome

|                |            |             |            |               |                                                                                            |
|----------------|------------|-------------|------------|---------------|--------------------------------------------------------------------------------------------|
| TCONS_00000355 | -0.031751  | 0.804328    | -0.42861   | BGIOSGA020219 | XP_002457198.1ATP-dependent 6-phosphofructokinase 6 isoform X1                             |
| TCONS_00008227 | -0.0317261 | 1.2092      | -0.291235  | BGIOSGA017915 | XP_006647406.1 probable bifunctional riboflavin biosynthesis protein RIBA 2, chloroplastic |
| TCONS_00009461 | -0.0314633 | 0.784255    | 0.953025   | #N/A          | XP_008651787.3dentin sialophosphoprotein                                                   |
| TCONS_00025606 | -0.0313931 | -0.433223   | -0.628926  | BGIOSGA030921 | XP_004958497.1probable carboxylesterase 18                                                 |
| TCONS_00011947 | -0.0311391 | -0.300087   | -0.402411  | BGIOSGA016081 | XP_006649786.1PREDICTED: uncharacterized protein LOC102720498                              |
| TCONS_00023153 | -0.0310973 | -1.6443     | -0.391797  | BGIOSGA024789 | XP_012699389.2putative FBD-associated F-box protein At5g38570                              |
| TCONS_00036320 | -0.0309857 | -0.00764347 | 1.05808    | BGIOSGA037683 | XP_015698508.1PREDICTED: uncharacterized protein LOC102721131                              |
| TCONS_00008914 | -0.0309035 | 0.259064    | 0.164519   | BGIOSGA005308 | XP_006649093.1 serine/threonine-protein kinase At5g01020                                   |
| TCONS_00020695 | -0.0308456 | -0.476292   | -0.0442842 | BGIOSGA027859 | XP_015696195.1 bromodomain-containing factor 1                                             |
| TCONS_00035963 | -0.0306863 | -0.116516   | -1.72367   | BGIOSGA037327 | XP_010237282.1disease resistance protein RGA2 isoform X1                                   |
| TCONS_00022644 | -0.030631  | -0.344219   | 0.531078   | BGIOSGA028425 | XP_006656289.2 probable sucrose-phosphate synthase 3 isoform X1                            |
| TCONS_00030154 | -0.0305083 | 0.775316    | 0.0501302  | BGIOSGA027941 | XP_006660685.1 thylakoidal processing peptidase 1, chloroplastic-like                      |
| TCONS_00019538 | -0.0304993 | 0.0602539   | 0.951766   | BGIOSGA017822 | XP_015692642.1 protein kri1                                                                |
| TCONS_00001714 | -0.0303986 | -2.59061    | -1.68248   | BGIOSGA028644 | XP_006644632.1 copper transport protein ATX1                                               |
| TCONS_00026770 | -0.030313  | 0.337549    | 0.640266   | BGIOSGA028833 | XP_006659492.1 glycoprotein 3-alpha-L-fucosyltransferase A-like                            |
| TCONS_00001441 | -0.0302215 | 1.16713     | -0.273446  | BGIOSGA020588 | XP_006644417.1 DEAD-box ATP-dependent RNA helicase 2                                       |
| TCONS_00015590 | -0.0301269 | -1.34048    | -1.06012   | BGIOSGA006823 | XP_006653257.2 phototropin-2                                                               |
| TCONS_00028278 | -0.0301095 | -3.99118    | -1.00258   | BGIOSGA029543 | XP_003574750.1beta-galucosidase 28                                                         |
| TCONS_00006751 | -0.029792  | -3.09811    | -1.82791   | BGIOSGA026692 | XP_006647792.1PREDICTED: uncharacterized protein LOC102719458                              |
| TCONS_00019290 | -0.0297281 | -0.304291   | -1.34362   | BGIOSGA019864 | XP_006654400.1 protein NRT1/ PTR FAMILY 3.1-like                                           |
| TCONS_00032915 | -0.0295391 | -0.663233   | -1.02878   | BGIOSGA001923 | XP_015698006.1 hydroxymethylglutaryl-CoA lyase, mitochondrial-like                         |
| TCONS_00034643 | -0.0294304 | -0.975622   | -0.203391  | BGIOSGA031219 | XP_015697622.1 protein NLP2                                                                |
| TCONS_00033626 | -0.0294006 | 0.513118    | -0.134836  | BGIOSGA034477 | XP_015698167.1PREDICTED: uncharacterized protein At3g49140                                 |
| TCONS_00036722 | -0.0290192 | 0.249677    | 0.31216    | BGIOSGA036594 | XP_004977339.1NDR1/HIN1-like protein 10                                                    |
| TCONS_00009703 | -0.0288184 | -1.01566    | 0.121237   | BGIOSGA006609 | XP_006649764.1PREDICTED: uncharacterized protein LOC102713884                              |
| TCONS_00001008 | -0.0285592 | -0.700983   | 0.368222   | BGIOSGA003610 | XP_006644216.1 ell-associated factor Eaf                                                   |
| TCONS_00032191 | -0.0283917 | 0.0205727   | 0.438571   | BGIOSGA028247 | NP_001150714.1catalytic/ oxidoreductase, acting on NADH or NADPH                           |
| TCONS_00016599 | -0.0282697 | 0.94536     | 0.996878   | BGIOSGA014365 | XP_003580534.1pentatricopeptide repeat-containing protein At1g79490, mitochondrial         |
| TCONS_00017810 | -0.0281639 | -0.6506     | -0.0560561 | BGIOSGA035405 | XP_006655322.2 isopentenyl-diphosphate Delta-isomerase I-like                              |
| TCONS_00010355 | -0.028094  | 0.718207    | -0.227083  | BGIOSGA012300 | XP_015698680.1 mechanosensitive ion channel protein 2, chloroplastic-like isoform X3       |
| TCONS_00005563 | -0.02805   | -0.314159   | 0.577412   | BGIOSGA016968 | XP_006646981.1 ubiquitin fusion degradation protein 1 homolog                              |
| TCONS_00024322 | -0.0277571 | -3.45633    | -4.0078    | BGIOSGA006521 | XP_006658093.1 flowering-promoting factor 1-like protein 5                                 |
| TCONS_00027381 | -0.0277305 | 0.161072    | -0.0588604 | BGIOSGA025859 | XP_010234378.1NAC domain-containing protein 14                                             |
| TCONS_00013858 | -0.0276823 | -0.541445   | -0.287606  | BGIOSGA022725 | XP_006652144.1 UDP-glycosyltransferase 92A1-like                                           |
| TCONS_00002478 | -0.0275877 | -0.926305   | 0.571517   | BGIOSGA023739 | XP_010921761.1 potassium transporter 7 isoform X2                                          |
| TCONS_00024365 | -0.0274987 | -1.34452    | 0.359097   | BGIOSGA009037 | XP_010233812.1uncharacterized protein LOC100825692 isoform X3                              |
| TCONS_00001890 | -0.0274484 | 0.70732     | -0.288423  | BGIOSGA006653 | XP_003569904.1protein PAT1 homolog 1                                                       |
| TCONS_00020272 | -0.0273974 | -0.585535   | -1.12305   | BGIOSGA005480 | XP_003564157.1ethylene-responsive transcription factor 1 isoform X1                        |
| TCONS_00025617 | -0.0273866 | -2.25764    | -1.00934   | BGIOSGA012663 | XP_015694750.1PREDICTED: uncharacterized protein LOC102709668                              |
| TCONS_00012059 | -0.0272165 | 1.9355      | 0.0443482  | BGIOSGA010949 | XP_006649901.1 lipid phosphate phosphatase gamma, chloroplastic                            |
| TCONS_00006436 | -0.0272045 | -0.927334   | 0.678095   | BGIOSGA008599 | XP_006647488.1PREDICTED: uncharacterized protein LOC102702253                              |
| TCONS_00016544 | -0.0270565 | 0.673013    | 1.11269    | BGIOSGA014423 | XP_015692332.1PREDICTED: uncharacterized protein LOC102705530                              |
| TCONS_00028716 | -0.0270258 | -0.691515   | -1.04323   | BGIOSGA012541 | XP_015696865.1 protein PHR1-LIKE 1-like isoform X2                                         |
| TCONS_00009213 | -0.026953  | 0.557934    | 0.928717   | BGIOSGA011036 | XP_006650987.1 serine/threonine-protein kinase ATG1a                                       |
| TCONS_00014702 | -0.0268835 | -2.3055     | -0.724366  | BGIOSGA011649 | XP_006652605.1 deSI-like protein At4g17486                                                 |
| TCONS_00020417 | -0.0267006 | 0.150335    | 0.76241    | BGIOSGA022602 | XP_006655952.1 tRNA (guanine-N(7))-methyltransferase                                       |
| TCONS_00007186 | -0.0266934 | 1.01745     | 0.143819   | BGIOSGA007312 | XP_006646756.1 E3 ubiquitin-protein ligase UPL3                                            |
| TCONS_00023845 | -0.0265931 | 0.343786    | 0.285312   | BGIOSGA016405 | XP_006657793.1 putative receptor-like protein kinase At4g00960                             |
| TCONS_00009271 | -0.0265708 | 0.154207    | 0.659491   | BGIOSGA011226 | XP_010229238.1CSC1-like protein At4g35870                                                  |
| TCONS_00005017 | -0.0264759 | -0.00772653 | 0.267971   | BGIOSGA000204 | XP_006645277.1 long chain base biosynthesis protein 2d                                     |
| TCONS_00037564 | -0.026456  | -0.237612   | -0.46704   | BGIOSGA035795 | XP_006650311.2 anaphase-promoting complex subunit 5                                        |
| TCONS_00023043 | -0.0264111 | 0.755532    | -0.54384   | BGIOSGA021712 | XP_006658245.1 protein PHLOEM PROTEIN 2-LIKE A10-like                                      |
| TCONS_00009216 | -0.0263959 | -0.403942   | -0.047852  | BGIOSGA022835 | XP_006649300.1 33 kDa ribonucleoprotein, chloroplastic-like                                |



transcriptome

|                |            |             |             |               |                                                                                       |
|----------------|------------|-------------|-------------|---------------|---------------------------------------------------------------------------------------|
| TCONS_00026884 | -0.0261701 | -0.472969   | -0.00187413 | BGIOSGA028941 | XP_006659555.1 phosphoribosylglycinamide formyltransferase, chloroplastic isoform X1  |
| TCONS_00007462 | -0.026085  | -0.127082   | -0.102092   | BGIOSGA007021 | XP_006646971.2 autophagy-related protein 11                                           |
| TCONS_00022869 | -0.0257097 | 0.423019    | 0.214551    | BGIOSGA028929 | XP_015693824.1PREDICTED: uncharacterized protein LOC102708538 isoform X1              |
| TCONS_00003859 | -0.0256741 | -0.690727   | -0.33754    | BGIOSGA001358 | XP_006644305.1 DNA repair protein RAD51 homolog 3                                     |
| TCONS_00005272 | -0.0256587 | 0.526691    | 0.809283    | BGIOSGA007380 | XP_006648227.1 RNA-binding protein NOB1                                               |
| TCONS_00002407 | -0.0253543 | 1.28771     | 1.55152     | BGIOSGA005046 | XP_006645227.1 glycine-rich RNA-binding protein 2, mitochondrial-like                 |
| TCONS_00015624 | -0.0252608 | -2.61293    | -1.25981    | BGIOSGA006027 | XP_004975276.17-deoxyloganetin glucosyltransferase                                    |
| TCONS_00010922 | -0.0251246 | 0.592826    | -0.0715905  | BGIOSGA029750 | XP_006650561.1 deoxyhypusine synthase-like                                            |
| TCONS_00014963 | -0.0248939 | 0.127998    | 0.21183     | BGIOSGA020482 | XP_004976847.1serine/threonine-protein phosphatase 6 regulatory subunit 3 isoform X1  |
| TCONS_00031439 | -0.0247354 | -0.694552   | 0.172701    | BGIOSGA033253 | XP_015697342.1 endonuclease Muts2                                                     |
| TCONS_00002757 | -0.0246685 | -2.38545    | -1.37304    | BGIOSGA002459 | XP_003565292.1protein NEGATIVE REGULATOR OF RESISTANCE                                |
| TCONS_00000228 | -0.0245988 | 0.254448    | 0.773607    | BGIOSGA002807 | XP_015694044.1 probable LRR receptor-like serine/threonine-protein kinase At3g47570   |
| TCONS_00011837 | -0.0244613 | -0.520614   | -0.95082    | BGIOSGA011176 | XP_006649680.1 squalene monooxygenase-like                                            |
| TCONS_00031562 | -0.0243199 | -3.4294     | -0.644288   | BGIOSGA016191 | XP_003581111.3chloroplast envelope quinone oxidoreductase homolog                     |
| TCONS_00004266 | -0.024281  | -0.882478   | 0.0298893   | BGIOSGA013381 | XP_004969709.1probable cytokinin riboside 5'-monophosphate phosphoribohydrolase LOGL1 |
| TCONS_00007421 | -0.0241716 | 0.373256    | 1.1119      | BGIOSGA020425 | XP_015689486.1 nuclear transcription factor Y subunit C-2                             |
| TCONS_00014295 | -0.0240753 | -0.340049   | -0.410388   | BGIOSGA008418 | XP_015692320.1 ultraviolet-B receptor UVR8-like                                       |
| TCONS_00037163 | -0.0240593 | -4.86795    | -0.766113   | BGIOSGA014777 | XP_012699834.1 leucine-rich repeat extensin-like protein 3                            |
| TCONS_00018154 | -0.0240585 | -1.86105    | -0.246837   | BGIOSGA020208 | XP_024314855.1F-box protein At5g49610 isoform X1                                      |
| TCONS_00033288 | -0.0240155 | #NA         | -1.95967    | BGIOSGA028249 | XP_006659958.1 endo-1,3;1,4-beta-D-glucanase-like                                     |
| TCONS_00036313 | -0.0238665 | 1.1979      | -1.1451     | BGIOSGA003839 | XP_006664146.2 probable protein phosphatase 2C 78                                     |
| TCONS_00032521 | -0.0238292 | 0.548668    | 0.621578    | BGIOSGA027817 | XP_002464409.1probable ascorbate-specific transmembrane electron transporter 1        |
| TCONS_00008738 | -0.0236521 | -0.28201    | -0.320627   | BGIOSGA007700 | XP_006647831.1 protein FAM32A                                                         |
| TCONS_00026528 | -0.0232738 | 1.25399     | -0.821115   | BGIOSGA030346 | XP_003574419.1probable WRKY transcription factor 53                                   |
| TCONS_00013146 | -0.0232317 | 0.557275    | -0.0311971  | BGIOSGA013731 | XP_021313661.1E3 ubiquitin protein ligase DRIP2                                       |
| TCONS_00010947 | -0.0230916 | -1.8022     | #NA         | BGIOSGA021907 | XP_015690064.1PREDICTED: uncharacterized protein LOC107303805                         |
| TCONS_00033588 | -0.0230738 | 1.13826     | 0.915353    | BGIOSGA033865 | XP_006663487.1 FBD-associated F-box protein At1g66310-like                            |
| TCONS_00004011 | -0.0229687 | 1.73599     | 1.484       | BGIOSGA007013 | XP_015694570.1 S-type anion channel SLAH2-like                                        |
| TCONS_00004540 | -0.0228562 | 0.555339    | 0.713514    | BGIOSGA011577 | XP_006644829.1 RNA-binding protein PNO1-like                                          |
| TCONS_00014595 | -0.022796  | -0.802515   | -1.64084    | BGIOSGA006476 | XP_015691894.1 dCTP pyrophosphatase 1-like                                            |
| TCONS_00031453 | -0.0224318 | 1.28988     | 1.28431     | BGIOSGA016343 | XP_003574177.1cytochrome P450 89A2                                                    |
| TCONS_00028183 | -0.0224079 | -0.205748   | -0.305068   | BGIOSGA029622 | XP_015695641.1 ubiquitin carboxyl-terminal hydrolase 17-like                          |
| TCONS_00016918 | -0.0223949 | -0.554604   | -0.721359   | BGIOSGA000012 | XP_006653062.1 soluble inorganic pyrophosphatase                                      |
| TCONS_00020215 | -0.0223901 | -0.132912   | -0.153193   | BGIOSGA023242 | XP_004964721.126S proteasome regulatory subunit 6A homolog                            |
| TCONS_00000620 | -0.0223166 | 1.23693     | 0.170452    | BGIOSGA031613 | XP_008662633.1protein STABILIZED1                                                     |
| TCONS_00011859 | -0.022217  | -0.556467   | -0.446588   | BGIOSGA004903 | XP_015690512.1 cyclin-J18-like isoform X1                                             |
| TCONS_00003024 | -0.0220544 | -0.767435   | 0.37632     | BGIOSGA014356 | XP_006643875.1 casein kinase I homolog 2-like                                         |
| TCONS_00001386 | -0.021775  | 0.353493    | 0.262467    | BGIOSGA011435 | XP_003569389.1cell division control protein 48 homolog C                              |
| TCONS_00010238 | -0.0216831 | 1.1112      | 0.569566    | BGIOSGA012803 | XP_006650166.2PREDICTED: uncharacterized protein LOC102713252                         |
| TCONS_00023603 | -0.0216681 | -0.521377   | 0.00698215  | BGIOSGA025625 | XP_006658525.1 exonuclease mut-7 homolog                                              |
| TCONS_00011089 | -0.0215296 | 0.647215    | 0.565634    | BGIOSGA013689 | XP_006650699.2 trafficking protein particle complex subunit 8 isoform X1              |
| TCONS_00005647 | -0.021379  | -0.304262   | 1.42974     | BGIOSGA001119 | XP_004951502.1plastidic ATP/ADP-transporter                                           |
| TCONS_00022169 | -0.02135   | -0.00016953 | 0.199846    | BGIOSGA013899 | NP_001150415.1thioredoxin reductase 2                                                 |
| TCONS_00019974 | -0.0211691 | 0.99467     | 0.367609    | BGIOSGA040185 | XP_006656555.1 cell division control protein 48 homolog C                             |
| TCONS_00020782 | -0.0211552 | -0.0430829  | 0.0826315   | BGIOSGA029799 | XP_015693590.1PREDICTED: uncharacterized protein LOC102712369, partial                |
| TCONS_00011641 | -0.0211475 | -0.769403   | -0.39874    | BGIOSGA015776 | XP_006649471.1 protein kinase 2B, chloroplastic-like                                  |
| TCONS_00027202 | -0.0210277 | -0.547732   | -0.891477   | BGIOSGA024011 | XP_006659025.1 ferredoxin-1, chloroplastic                                            |
| TCONS_00011718 | -0.021027  | -0.828626   | 0.172317    | BGIOSGA011292 | XP_003558604.1FRIGIDA-like protein 3                                                  |
| TCONS_00000306 | -0.0208206 | 0.258052    | 0.494424    | BGIOSGA015724 | XP_006645559.1 ubiquitin carboxyl-terminal hydrolase 14 isoform X1                    |
| TCONS_00022994 | -0.0207851 | -1.21855    | -0.131338   | #N/A          | #N/A                                                                                  |
| TCONS_00027336 | -0.0207769 | -0.01889    | 0.677816    | BGIOSGA027668 | XP_015695492.1 lysine-specific histone demethylase 1 homolog 2-like                   |
| TCONS_00017896 | -0.0205398 | 0.301236    | -0.209762   | BGIOSGA019944 | XP_006654478.1 solute carrier family 35 member F2-like                                |
| TCONS_00006931 | -0.0204039 | 0.0249596   | 0.446219    | BGIOSGA009111 | XP_006647966.1PREDICTED: uncharacterized protein LOC102700120                         |
| TCONS_00037055 | -0.0203116 | 1.75494     | 0.756507    | BGIOSGA020576 | XP_004962571.1serine hydroxymethyltransferase 4                                       |
| TCONS_00008502 | -0.0203088 | -1.45718    | 0.207151    | BGIOSGA006309 | XP_004953297.1protein ORANGE, chloroplastic                                           |
| TCONS_00018530 | -0.0201151 | 0.0700262   | -0.488823   | BGIOSGA023627 | XP_003563269.1NADH dehydrogenase [ubiquinone] 1 beta subcomplex subunit 2             |

## transcriptome

|                |            |            |            |               |                                                                                |
|----------------|------------|------------|------------|---------------|--------------------------------------------------------------------------------|
| TCONS_00015184 | -0.0199462 | 0.278111   | 0.391934   | BGIOSGA017366 | XP_015691620.1 endonuclease MutS2                                              |
| TCONS_00010765 | -0.0197079 | -0.758586  | -0.315241  | BGIOSGA013390 | XP_006650441.2 F-box protein At1g55000                                         |
| TCONS_00009481 | -0.0196699 | -0.672508  | -0.113172  | BGIOSGA036188 | XP_004985376.1 putative yippee-like protein Os10g0369500                       |
| TCONS_00020140 | -0.0194589 | 0.0344931  | 0.681492   | BGIOSGA022197 | XP_006656655.2 F-box/LRR-repeat MAX2 homolog                                   |
| TCONS_00029244 | -0.0186382 | -0.0345072 | 2.12472    | BGIOSGA030987 | XP_022680062.1 heat shock protein 81-1-like                                    |
| TCONS_00006906 | -0.018623  | -0.284774  | 0.212754   | BGIOSGA011314 | XP_006647937.2 transport inhibitor response 1-like protein                     |
| TCONS_00017711 | -0.0185387 | -0.713153  | -0.757794  | BGIOSGA005604 | NP_001141942.1 annexin-like protein RJ4                                        |
| TCONS_00015913 | -0.0185357 | 0.742895   | -0.214737  | BGIOSGA006274 | XP_015692355.1 PREDICTED: uncharacterized protein LOC102714282 isoform X2      |
| TCONS_00003361 | -0.0185083 | -1.50868   | -0.455813  | BGIOSGA001208 | XP_015688307.1 3'-N-debenzoyl-2'-deoxytaxol N-benzoyltransferase-like          |
| TCONS_00024387 | -0.0184363 | -0.485396  | 0.348102   | BGIOSGA026429 | XP_006665015.1 manganese-dependent ADP-ribose/CDP-alcohol diphosphatase        |
| TCONS_00019221 | -0.0182997 | -0.458315  | 0.510503   | BGIOSGA018127 | XP_006654348.1 protein N-terminal glutamine amidohydrolase isoform X2          |
| TCONS_00016125 | -0.0179142 | -1.06918   | -0.550072  | BGIOSGA021390 | XP_006653538.1 very-long-chain 3-oxoacyl-CoA reductase 1-like                  |
| TCONS_00024121 | -0.0178344 | 0.37324    | 1.26298    | BGIOSGA026156 | XP_015695304.1 homeobox-DDT domain protein RL3                                 |
| TCONS_00018160 | -0.0177229 | 0.772784   | 0.563101   | BGIOSGA002932 | XP_006654672.1 ATP-dependent 6-phosphofructokinase 6-like                      |
| TCONS_00023096 | -0.0177052 | 0.383396   | -0.332269  | BGIOSGA005684 | XP_006652223.1 U4/U6 small nuclear ribonucleoprotein Prp31                     |
| TCONS_00016763 | -0.0176105 | 0.154767   | 0.712047   | BGIOSGA014201 | XP_006652932.1 protein FATTY ACID EXPORT 7-like                                |
| TCONS_00027032 | -0.0175003 | -2.22524   | -0.498209  | BGIOSGA013958 | XP_012702477.1 disease resistance protein RPM1                                 |
| TCONS_00023891 | -0.0173982 | -0.932564  | -0.518289  | BGIOSGA028499 | XP_006657820.1 mitochondrial pyruvate carrier 4-like                           |
| TCONS_00009168 | -0.0173672 | -0.920039  | -0.0796332 | BGIOSGA007048 | XP_006650434.1 valine-tRNA ligase, mitochondrial 1-like                        |
| TCONS_00000628 | -0.0173619 | 0.740417   | 1.16656    | BGIOSGA003211 | XP_015688103.1 Ia-related protein 1A isoform X2                                |
| TCONS_00009299 | -0.0171495 | -0.875283  | -0.453739  | BGIOSGA006036 | XP_015689761.1 PREDICTED: uncharacterized protein LOC102706550                 |
| TCONS_00027804 | -0.0169061 | 0.00342695 | 0.27877    | BGIOSGA027196 | XP_006655101.1 signal recognition particle subunit SRP68                       |
| TCONS_00024558 | -0.0168431 | 0.618512   | 0.38442    | BGIOSGA013864 | XP_006658271.1 DEAD-box ATP-dependent RNA helicase 53                          |
| TCONS_00010934 | -0.0166767 | 1.81554    | 1.10686    | BGIOSGA017813 | XP_006650569.1 calmodulin-like protein 4                                       |
| TCONS_00028496 | -0.01655   | 0.273133   | 0.561044   | BGIOSGA026460 | XP_010236392.1 bifunctional TH2 protein, mitochondrial                         |
| TCONS_00005134 | -0.0164824 | 0.0692938  | -0.0482495 | BGIOSGA000033 | XP_006645358.1 E3 ubiquitin-protein ligase RGLG1-like                          |
| TCONS_00006388 | -0.0164357 | -0.200687  | -0.293562  | BGIOSGA008550 | XP_006647461.2 myosin-3                                                        |
| TCONS_00007880 | -0.0162705 | 0.072207   | 0.638405   | BGIOSGA011284 | XP_006647224.1 F-box/kelch-repeat protein OR23 isoform X1                      |
| TCONS_00010565 | -0.0159388 | 0.0973327  | 0.25087    | BGIOSGA013180 | XP_003562225.1 F-box/LRR-repeat protein 17 isoform X1                          |
| TCONS_00023975 | -0.0158448 | -1.10217   | -1.19      | BGIOSGA026006 | XP_006657882.1 major facilitator superfamily domain-containing protein 12-like |
| TCONS_00023757 | -0.0157762 | -0.734501  | -0.114634  | BGIOSGA035423 | XP_006663516.2 PREDICTED: uncharacterized protein LOC102714870                 |
| TCONS_00032556 | -0.0157228 | -2.26718   | -0.754284  | BGIOSGA027994 | NP_001105021.1 aquaporin NIP3-1                                                |
| TCONS_00010472 | -0.0156991 | -0.469586  | -1.13601   | BGIOSGA012862 | XP_015691101.1 ACT domain-containing protein ACR4-like isoform X1              |
| TCONS_00021418 | -0.0155936 | 0.742084   | -0.0946185 | BGIOSGA010045 | XP_006656523.1 protein argonaute 1D                                            |
| TCONS_00014644 | -0.0155521 | -0.0248582 | -0.39663   | BGIOSGA004756 | XP_006652549.1 ABC transporter G family member 11-like                         |
| TCONS_00012462 | -0.015171  | -0.0202579 | 0.342008   | BGIOSGA033170 | XP_006651508.1 vacuolar protein sorting-associated protein 52 A isoform X2     |
| TCONS_00010276 | -0.0150174 | 0.263959   | 0.630098   | BGIOSGA023908 | XP_006650180.1 elongation factor 1-delta 2                                     |
| TCONS_00020126 | -0.0149766 | -0.230646  | 0.600555   | BGIOSGA021023 | XP_006655790.1 cysteine synthase-like isoform X1                               |
| TCONS_00013906 | -0.0149471 | 0.159181   | 0.0491613  | BGIOSGA016081 | XP_015691394.1 protein root UVB sensitive 1, chloroplastic                     |
| TCONS_00018486 | -0.0149456 | 0.0136635  | -0.210342  | BGIOSGA002861 | XP_015693068.1 probable serine/threonine-protein kinase NAK                    |
| TCONS_00001168 | -0.014819  | -0.145578  | 0.634136   | BGIOSGA014717 | XP_004969013.1 casein kinase I                                                 |
| TCONS_00010343 | -0.0147437 | 0.0813581  | 0.134261   | BGIOSGA012919 | XP_006650215.1 probable ubiquitin conjugation factor E4                        |
| TCONS_00022582 | -0.0146431 | 0.477868   | 0.290983   | BGIOSGA020861 | XP_015694418.1 cell division cycle protein 27 homolog B isoform X1             |
| TCONS_00031422 | -0.0144373 | -4.00889   | -2.40918   | BGIOSGA033236 | XP_015697386.1 cingulin-like                                                   |
| TCONS_00024428 | -0.0142625 | -1.18731   | -0.507467  | BGIOSGA010422 | XP_003557706.1 tobamovirus multiplication protein 1                            |
| TCONS_00020746 | -0.0142276 | 0.105859   | 0.296237   | BGIOSGA002436 | XP_015694195.1 tRNA(adenine(34)) deaminase, chloroplastic                      |
| TCONS_00006032 | -0.013896  | -1.61667   | 0.279872   | BGIOSGA034048 | XP_010235427.1 protein MICRORCHIDIA 7 isoform X2                               |
| TCONS_00003773 | -0.0138075 | 0.0185199  | -0.144476  | BGIOSGA001433 | XP_015699102.1 PREDICTED: uncharacterized protein LOC102707069                 |
| TCONS_00006205 | -0.0136816 | -0.22082   | -0.0987495 | BGIOSGA008368 | XP_004952660.2 uncharacterized protein LOC101786880                            |
| TCONS_00031941 | -0.0135976 | -0.479011  | 0.779498   | BGIOSGA005102 | XP_015697454.1 transcription initiation factor IIF subunit alpha-like          |
| TCONS_00014019 | -0.0134654 | -0.645637  | 0.418937   | BGIOSGA016165 | XP_006652188.1 cell division cycle 5-like protein                              |
| TCONS_00005124 | -0.0134542 | -0.190783  | 0.364561   | BGIOSGA000080 | XP_024312562.1 uncharacterized protein LOC104581991                            |
| TCONS_00027179 | -0.0133873 | 0.670158   | 0.205099   | BGIOSGA012829 | XP_006659013.1 B3 domain-containing protein IDEF1-like                         |

transcriptome

|                |             |            |            |               |                                                                                           |
|----------------|-------------|------------|------------|---------------|-------------------------------------------------------------------------------------------|
| TCONS_00006794 | -0.0133423  | -0.0389212 | -1.25721   | BGIOSGA025621 | XP_006647832.1 E3 ubiquitin-protein ligase CIP8-like                                      |
| TCONS_00002100 | -0.0131004  | -1.2145    | -0.115606  | BGIOSGA029525 | XP_006646443.1 cinnamoyl-CoA reductase 1-like                                             |
| TCONS_00035671 | -0.0129165  | -1.47425   | -0.363908  | BGIOSGA032924 | XP_006663868.2 aldehyde dehydrogenase family 3 member H1-like                             |
| TCONS_00029118 | -0.0128043  | 0.46589    | 0.144759   | BGIOSGA030869 | XP_015696767.1 PREDICTED: uncharacterized protein LOC102702971 isoform X2                 |
| TCONS_00005772 | -0.0127501  | -1.33431   | -0.0173924 | BGIOSGA001487 | XP_015688536.1 putative callose synthase 8                                                |
| TCONS_00028008 | -0.0124821  | 0.390717   | 0.23707    | BGIOSGA026978 | XP_015696022.1 EVI5-like protein                                                          |
| TCONS_00005009 | -0.0124678  | -1.57893   | 0.0443897  | BGIOSGA000210 | XP_006645270.2 PREDICTED: uncharacterized protein LOC102713964                            |
| TCONS_00017732 | -0.0124589  | -1.90253   | 0.594748   | BGIOSGA016726 | XP_006654350.1 AP2-like ethylene-responsive transcription factor At2g41710                |
| TCONS_00033447 | -0.0124005  | 0.384314   | -0.359093  | BGIOSGA025185 | XP_006663437.1 ubiquitin carboxyl-terminal hydrolase 5                                    |
| TCONS_00013238 | -0.0120469  | 0.302228   | 0.799218   | BGIOSGA038953 | XP_006650660.1 cytochrome c biogenesis protein CCS1, chloroplast                          |
| TCONS_00022441 | -0.0120145  | -0.0769973 | 0.344437   | BGIOSGA011333 | XP_006649500.1 UDP-glycosyltransferase TURAN                                              |
| TCONS_00010608 | -0.0119688  | -0.023002  | 0.194944   | BGIOSGA010131 | XP_006650361.1 CCR4-NOT transcription complex subunit 3 isoform X1                        |
| TCONS_00001827 | -0.0119344  | -5.53622   | -0.597618  | BGIOSGA027158 | XP_015697864.1 cellulose synthase A catalytic subunit 4 [UDP-forming] isoform X2          |
| TCONS_00029773 | -0.0117143  | 0.489106   | -0.430648  | BGIOSGA035876 | XP_006660510.1 ubiquitin-conjugating enzyme E2 variant 1C-like                            |
| TCONS_00020036 | -0.0116715  | -2.96626   | -2.34709   | BGIOSGA022217 | XP_015693420.1 BAG family molecular chaperone regulator 3-like                            |
| TCONS_00030876 | -0.0115562  | -1.54682   | 0.316095   | BGIOSGA037136 | XP_006661684.1 PREDICTED: uncharacterized protein At1g10890-like                          |
| TCONS_00025054 | -0.0115117  | -1.40055   | 0.00865216 | BGIOSGA025649 | XP_006657673.1 acyl-coenzyme A thioesterase 13-like                                       |
| TCONS_00031489 | -0.0113447  | -0.132648  | 0.909801   | BGIOSGA033301 | XP_006662527.1 flavonol synthase/flavanone 3-hydroxylase-like                             |
| TCONS_00000682 | -0.011082   | -1.39468   | -0.758183  | BGIOSGA003269 | XP_004967668.1F-box protein At2g26850                                                     |
| TCONS_00029337 | -0.011028   | 0.516207   | 0.32351    | BGIOSGA016671 | XP_004957335.1 histidine protein methyltransferase 1 homolog                              |
| TCONS_00001621 | -0.0109979  | -0.706306  | -1.30717   | BGIOSGA023551 | XP_006646232.1 putative clathrin assembly protein At2g01600                               |
| TCONS_00010989 | -0.0107982  | 0.820629   | -0.666132  | BGIOSGA011455 | XP_015690890.1 UDP-glucose 6-dehydrogenase 3                                              |
| TCONS_00017688 | -0.0107291  | -1.40898   | -0.71106   | BGIOSGA002233 | XP_006654329.1 cytokinin dehydrogenase 9 isoform X1                                       |
| TCONS_00028525 | -0.0106347  | 0.178495   | -0.0170801 | BGIOSGA030278 | XP_024957980.1 sodium/proton antiporter 1 isoform X2                                      |
| TCONS_00021015 | -0.0106144  | 0.157325   | -1.8511    | BGIOSGA034025 | XP_006656232.1 fructose-bisphosphate aldolase, cytoplasmic isozyme 1-like                 |
| TCONS_00030375 | -0.0106118  | -2.23176   | -0.186259  | BGIOSGA016385 | XP_006660854.1 protein LITTLE ZIPPER 2-like                                               |
| TCONS_00031412 | -0.0106106  | 0.41707    | 1.01286    | BGIOSGA027116 | XP_015697143.1 pentatricopeptide repeat-containing protein At2g20710, mitochondrial-like  |
| TCONS_00001019 | -0.0105845  | -0.418319  | 0.0128154  | BGIOSGA028482 | XP_006644210.1 protein ENHANCED DOWNY MILDEW 2-like                                       |
| TCONS_00012624 | -0.0104595  | 0.547833   | 0.973539   | BGIOSGA010349 | XP_006650304.1 arabinosyltransferase XEG113                                               |
| TCONS_00011471 | -0.010361   | 0.631467   | 0.505597   | BGIOSGA002691 | XP_006649296.1 50S ribosomal protein L11                                                  |
| TCONS_00001996 | -0.0101664  | -0.191831  | 0.613554   | BGIOSGA003541 | XP_006644856.1 4-diphosphocytidyl-2-C-methyl-D-erythritol kinase, chloroplast             |
| TCONS_00000488 | -0.0100652  | -1.11721   | -0.500078  | BGIOSGA003064 | XP_015697550.1 acyl-coenzyme A thioesterase 13-like isoform X3                            |
| TCONS_00021527 | -0.00998065 | -0.0796784 | 0.67788    | BGIOSGA005707 | XP_015694198.1 PREDICTED: uncharacterized protein LOC102702856 isoform X3                 |
| TCONS_00002333 | -0.00996713 | -3.3651    | -1.79608   | BGIOSGA014525 | XP_021312966.1 protein IQ-DOMAIN 14                                                       |
| TCONS_00020338 | -0.00980025 | 0.220379   | -0.180372  | BGIOSGA029299 | XP_002436684.1 mitochondrial phosphate carrier protein 3, mitochondrial                   |
| TCONS_00001612 | -0.00973552 | 0.34427    | 0.148896   | BGIOSGA027108 | XP_003569601.1 uncharacterized protein LOC100824080                                       |
| TCONS_00015185 | -0.00966167 | 0.901306   | 2.47618    | BGIOSGA034926 | XP_006653888.1 MLO-like protein 14                                                        |
| TCONS_00013025 | -0.00960661 | -1.57973   | -3.25849   | BGIOSGA009964 | XP_006650462.1 PREDICTED: uncharacterized protein LOC102704500 isoform X1                 |
| TCONS_00011675 | -0.00949693 | -0.125318  | 0.289969   | BGIOSGA021019 | XP_006649500.1 UDP-glycosyltransferase TURAN                                              |
| TCONS_00001519 | -0.00949507 | -0.666125  | -0.189062  | BGIOSGA000351 | XP_015695030.1 putative exosome complex component rrp40                                   |
| TCONS_00000980 | -0.00943978 | 0.50373    | 0.910335   | BGIOSGA001607 | XP_004968801.1 protein DMP3                                                               |
| TCONS_00004500 | -0.0093804  | -0.0954074 | 0.00849889 | BGIOSGA036998 | XP_006646385.1 purple acid phosphatase 2                                                  |
| TCONS_00019131 | -0.00933706 | -0.164978  | -0.0891057 | BGIOSGA015886 | XP_004962376.1 protein trichome birefringence-like 28                                     |
| TCONS_00007276 | -0.0092777  | 0.24049    | 0.395356   | BGIOSGA007207 | XP_015688440.1 RNA polymerase II transcription factor B subunit 4                         |
| TCONS_00004550 | -0.00907224 | -1.96287   | 0.474794   | BGIOSGA020116 | XP_006644836.1 PREDICTED: uncharacterized protein LOC102706984                            |
| TCONS_00014359 | -0.00905915 | -0.180283  | 0.149216   | BGIOSGA008474 | XP_015692202.1 cryptochrome-1 isoform X1                                                  |
| TCONS_00023379 | -0.00894882 | 0.54388    | 1.13714    | BGIOSGA013821 | XP_010228213.1 amino acid transporter ANT1                                                |
| TCONS_00008908 | -0.00803594 | -0.208541  | -1.00007   | BGIOSGA023919 | XP_006647991.2 nuclear transcription factor Y subunit A-4-like                            |
| TCONS_00013729 | -0.00803594 | 0.501952   | -0.192711  | #N/A          | #N/A                                                                                      |
| TCONS_00022072 | -0.00786039 | 0.476698   | 0.705468   | BGIOSGA014137 | XP_006665104.1 phosphatidylinositol 4-kinase gamma 5-like                                 |
| TCONS_00031001 | -0.00783076 | 0.273456   | 0.431413   | BGIOSGA005081 | XP_006662301.1 calmodulin-binding transcription activator 3-like                          |
| TCONS_00004602 | -0.00777398 | -0.51023   | -0.558225  | BGIOSGA001903 | XP_008451087.1 60S ribosomal protein L30                                                  |
| TCONS_00017848 | -0.00776902 | 0.898717   | 1.00253    | BGIOSGA036861 | XP_006655343.1 protein trichome birefringence-like 7                                      |
| TCONS_00013321 | -0.00776551 | 1.31858    | 0.661509   | BGIOSGA006954 | XP_006651898.1 zinc finger A20 and AN1 domain-containing stress-associated protein 7-like |

## transcriptome

|                |             |             |            |               |                                                                                               |
|----------------|-------------|-------------|------------|---------------|-----------------------------------------------------------------------------------------------|
| TCONS_00010658 | -0.00772941 | 1.68214     | 0.169094   | BGIOSGA019279 | XP_020408369.1 putative disease resistance RPP13-like protein 3                               |
| TCONS_00029340 | -0.00771827 | 0.527981    | 0.389616   | BGIOSGA031088 | XP_006660844.1 transcription factor 25                                                        |
| TCONS_00013227 | -0.00767006 | 0.0781448   | 0.596268   | BGIOSGA009759 | XP_015689841.1 transmembrane protein 147                                                      |
| TCONS_00035499 | -0.00760634 | -2.5133     | -3.47665   | BGIOSGA034717 | XP_006662695.1 PREDICTED: uncharacterized protein LOC102706327                                |
| TCONS_00037562 | -0.00757212 | -0.345209   | -1.51068   | BGIOSGA007809 | XP_006664222.1 cysteine synthase                                                              |
| TCONS_00004861 | -0.0074053  | 0.436522    | 1.09037    | BGIOSGA019009 | XP_015699178.1 probable phosphoribosylformylglycinamide synthase, chloroplastic/mitochondrial |
| TCONS_00024151 | -0.00737584 | 0.705148    | 0.358885   | BGIOSGA026189 | XP_006657987.1 PREDICTED: uncharacterized protein LOC102720617                                |
| TCONS_00004584 | -0.00731109 | 0.563772    | 0.457557   | BGIOSGA000629 | XP_006644873.1 rhomboid-like protein 20                                                       |
| TCONS_00023164 | -0.00727353 | -0.691043   | 0.0106183  | BGIOSGA031389 | XP_003572096.1 mediator of RNA polymerase II transcription subunit 31                         |
| TCONS_00035639 | -0.00722426 | 0.23393     | -0.426866  | BGIOSGA019609 | XP_015698722.1 long chain acyl-CoA synthetase 9, chloroplastic isoform X1                     |
| TCONS_00036173 | -0.00718153 | -0.683552   | -0.324125  | BGIOSGA037530 | XP_008662016.1 riboflavin synthase alpha chain isoform X1                                     |
| TCONS_00003837 | -0.00715467 | 0.203757    | 0.519728   | BGIOSGA005794 | XP_006646018.2 IQ domain-containing protein IQM1                                              |
| TCONS_00033240 | -0.00712815 | -0.204269   | 1.25385    | BGIOSGA029101 | XP_015697615.1 la-related protein 6B-like                                                     |
| TCONS_00019584 | -0.00708734 | -3.40614    | -1.00243   | BGIOSGA034564 | XP_006654606.1 NAD(P)H dehydrogenase (quinone) FQR1-like                                      |
| TCONS_00013322 | -0.00699559 | -1.04368    | -0.562087  | BGIOSGA011785 | XP_006654944.1 probable glucuronosyltransferase Os05g0123100                                  |
| TCONS_00016086 | -0.00697846 | -1.83433    | -0.328868  | BGIOSGA026304 | XP_006652406.1 beta-glucosidase 13                                                            |
| TCONS_00002928 | -0.00685996 | -0.364306   | -0.36879   | BGIOSGA002294 | XP_006645542.2 dol-P-Man:Man(5)GlcNAc(2)-PP-Dol alpha-1,3-mannosyltransferase                 |
| TCONS_00011847 | -0.00684783 | -0.475702   | -0.0722906 | BGIOSGA011162 | XP_004987091.1 mucin-7 isoform X1                                                             |
| TCONS_00028853 | -0.00680933 | -0.334212   | -0.488551  | BGIOSGA028627 | XP_015696755.1 PREDICTED: uncharacterized protein LOC102720628                                |
| TCONS_00033628 | -0.00672147 | 0.13747     | 0.219943   | BGIOSGA020099 | XP_006662993.1 dr1-associated corepressor-like                                                |
| TCONS_00022004 | -0.0066775  | -0.576083   | 0.545337   | BGIOSGA021513 | XP_015694178.1 THO complex subunit 4D isoform X2                                              |
| TCONS_00014014 | -0.00666492 | -1.79184    | -1.30197   | BGIOSGA016161 | XP_006652185.2 protein PRD1                                                                   |
| TCONS_00026932 | -0.00646546 | 0.134451    | 0.758521   | BGIOSGA035356 | XP_015695743.1 geranylgeranyl transferase type-2 subunit beta-like                            |
| TCONS_00032483 | -0.00640527 | 0.129202    | 0.598796   | BGIOSGA031634 | XP_006662467.1 protein TIC110, chloroplastic                                                  |
| TCONS_00022632 | -0.00628986 | 0.450838    | 0.387902   | BGIOSGA020810 | XP_015693890.1 elongator complex protein 4                                                    |
| TCONS_00020758 | -0.00616663 | -0.107531   | -0.383375  | BGIOSGA009251 | XP_006656103.2 phosphate transporter PHO1-3-like                                              |
| TCONS_00035411 | -0.0060916  | -0.638172   | -1.72914   | BGIOSGA033512 | XP_015697867.1 ribulose bisphosphate carboxylase/oxygenase activase, chloroplastic            |
| TCONS_00001578 | -0.0060671  | -0.138446   | 1.28455    | BGIOSGA004210 | XP_006646205.2 protein SDE2 homolog                                                           |
| TCONS_00009190 | -0.00588791 | -1.85673    | -1.14573   | BGIOSGA005701 | XP_006649275.1 ARM REPEAT PROTEIN INTERACTING WITH ABF2                                       |
| TCONS_00011932 | -0.00585512 | 0.0131638   | 0.717682   | BGIOSGA009792 | XP_006649766.2 imidazole glycerol phosphate synthase hisHf, chloroplastic isoform X2          |
| TCONS_00035486 | -0.00577388 | -1.14866    | 0.101155   | BGIOSGA036899 | XP_006662683.1 PREDICTED: uncharacterized protein LOC102702887                                |
| TCONS_00002051 | -0.00563798 | -0.00535118 | 0.522483   | BGIOSGA025407 | XP_015688326.1 zinc finger protein VAR3, chloroplastic                                        |
| TCONS_00004126 | -0.00535488 | -0.363928   | -2.42178   | BGIOSGA008700 | XP_015689505.1 probable WRKY transcription factor 71                                          |
| TCONS_00036672 | -0.00532712 | 0.785557    | 0.18766    | BGIOSGA001898 | XP_006663816.1 pyruvate kinase 1, cytosolic                                                   |
| TCONS_00033739 | -0.00523172 | 0.587131    | 0.476718   | BGIOSGA012399 | XP_006663004.2 PREDICTED: uncharacterized protein LOC102711922                                |
| TCONS_00008515 | -0.00521198 | -0.282636   | -0.0761014 | BGIOSGA005913 | XP_015689479.1 putative lipase YOR059C                                                        |
| TCONS_00014090 | -0.00496153 | 0.254148    | 0.051181   | BGIOSGA016248 | XP_006652127.1 probable sodium/metabolite cotransporter BASS1, chloroplastic                  |
| TCONS_00037948 | -0.00487361 | 1.78901     | -0.649376  | BGIOSGA005576 | XP_006663677.1 wall-associated receptor kinase 5-like                                         |
| TCONS_00016698 | -0.00482853 | 2.00605     | 0.264976   | BGIOSGA001936 | XP_002448611.1 UBP1-associated protein 2B                                                     |
| TCONS_00022457 | -0.00479124 | 0.490677    | 0.517371   | BGIOSGA007805 | XP_015694101.1 elongation factor 1-gamma 3                                                    |
| TCONS_00017938 | -0.00471725 | -0.210372   | 0.0390071  | BGIOSGA003812 | XP_015692619.1 ATP-dependent zinc metalloprotease FTSH 8, mitochondrial                       |
| TCONS_00015226 | -0.00464659 | 0.504511    | -0.045312  | BGIOSGA020949 | XP_006653078.1 30S ribosomal protein S17, chloroplastic                                       |
| TCONS_00033929 | -0.0042743  | -1.71855    | -3.4208    | BGIOSGA008289 | XP_015697731.1 myosin-7-like                                                                  |
| TCONS_00025955 | -0.00427345 | 0.00181254  | -0.669122  | BGIOSGA026513 | XP_006659860.1 transmembrane 9 superfamily member 2-like                                      |
| TCONS_00037045 | -0.00407583 | -0.190762   | -0.366049  | BGIOSGA004918 | XP_015698843.1 PREDICTED: uncharacterized protein LOC102703739                                |
| TCONS_00021705 | -0.00383464 | 0.0505007   | 0.956273   | BGIOSGA021818 | XP_006656691.1 fanconi-associated nuclease 1 homolog                                          |
| TCONS_00018013 | -0.00383205 | 0.0739206   | -0.608185  | BGIOSGA020061 | XP_003626648.1 NADH dehydrogenase [ubiquinone] 1 alpha subcomplex subunit 1                   |
| TCONS_00012651 | -0.00382333 | -0.576391   | -1.17189   | BGIOSGA019463 | XP_006650296.2 PREDICTED: uncharacterized protein LOC102703851 isoform X2                     |
| TCONS_00015942 | -0.0036533  | 1.14413     | 0.716971   | BGIOSGA015041 | XP_006652316.1 regulator of nonsense transcripts UPF3 isoform X2                              |
| TCONS_00017098 | -0.00359694 | -0.387279   | 0.38218    | BGIOSGA020375 | XP_006654022.1 aspartic proteinase                                                            |
| TCONS_00009450 | -0.00352098 | 0.0718933   | 1.1404     | BGIOSGA011999 | XP_015690392.1 putative dihydroflavonol-4-reductase                                           |
| TCONS_00006108 | -0.0035185  | -4.41063    | -4.01128   | BGIOSGA019196 | XP_003571092.1 isoflavone 2'-hydroxylase                                                      |
| TCONS_00034316 | -0.00343645 | -0.710294   | -2.42652   | BGIOSGA037225 | XP_006664468.1 pre-mRNA-splicing factor CWC22 homolog                                         |
| TCONS_00029341 | -0.00319954 | 0.55535     | 0.454679   | BGIOSGA031089 | XP_006660845.1 ATPase family AAA domain-containing protein At1g05910                          |
| TCONS_00021425 | -0.00316215 | -0.589203   | -0.236692  | BGIOSGA023650 | XP_006656527.1 transmembrane protein 53-like                                                  |
| TCONS_00029676 | -0.00307444 | -1.1569     | -2.36718   | BGIOSGA020912 | XP_006660469.1 SEC14 cytosolic factor-like                                                    |

## transcriptome

|                |              |            |             |               |                                                                                     |
|----------------|--------------|------------|-------------|---------------|-------------------------------------------------------------------------------------|
| TCONS_00028616 | -0.00304575  | 0.742064   | 0.686565    | BGIOSGA030365 | XP_015696490.1 exosome complex component RRP41 homolog isoform X3                   |
| TCONS_00011122 | -0.0029869   | -0.282015  | 0.379723    | BGIOSGA014096 | XP_006650721.1 pentatricopeptide repeat-containing protein At2g02980, chloroplastic |
| TCONS_00004369 | -0.00292585  | -0.107101  | 0.177731    | BGIOSGA004368 | XP_015699141.1 hexokinase-6                                                         |
| TCONS_00019956 | -0.00274419  | 0.343285   | 0.51037     | BGIOSGA035757 | XP_015693831.1 protein arginine N-methyltransferase 7 isoform X1                    |
| TCONS_00016858 | -0.00268838  | -0.541322  | -1.04225    | BGIOSGA023855 | XP_002448757.1small glutamine-rich tetraatricopeptide repeat-containing protein 2   |
| TCONS_00005469 | -0.00220206  | 0.167208   | 0.559384    | BGIOSGA007579 | XP_003574897.2putative FBD-associated F-box protein At5g56390                       |
| TCONS_00015173 | -0.002168    | -1.41233   | -2.01461    | BGIOSGA029759 | XP_004960064.1WD repeat-containing protein 44                                       |
| TCONS_00013507 | -0.00206841  | -1.37882   | -0.54802    | BGIOSGA010394 | XP_022679114.1wall-associated receptor kinase 2                                     |
| TCONS_00013546 | -0.00189969  | 1.10319    | 0.514702    | BGIOSGA009429 | XP_002463510.1elongation factor Tu, mitochondrial                                   |
| TCONS_00018379 | -0.00168383  | -0.641556  | -0.373938   | BGIOSGA001160 | XP_006654840.2 auxilin-like protein 1                                               |
| TCONS_00019875 | -0.00155464  | -0.696887  | -0.268886   | BGIOSGA038132 | XP_003576022.3putative disease resistance protein RGA3                              |
| TCONS_00018658 | -0.00150194  | 0.5064     | -0.0344205  | BGIOSGA006264 | XP_006654072.1 protein disulfide isomerase-like 2-1                                 |
| TCONS_00034220 | -0.00141678  | 0.675629   | 0.592431    | BGIOSGA036703 | XP_006663176.1 actin cytoskeleton-regulatory complex protein pan1-like              |
| TCONS_00007233 | -0.00128527  | -0.661136  | 0.479938    | BGIOSGA007255 | XP_006646779.1 F-box/kelch-repeat protein SKIP4                                     |
| TCONS_00018147 | -0.00123487  | -0.975969  | 0.28667     | BGIOSGA002182 | XP_015693148.1 mitogen-activated protein kinase kinase kinase 13-A-like             |
| TCONS_00000322 | -0.00106397  | 0.437255   | 0.385556    | BGIOSGA002897 | XP_006643839.2PREDICTED: uncharacterized protein LOC102717287 isoform X2            |
| TCONS_00011710 | -0.0010044   | -0.189308  | -0.0559875  | BGIOSGA035144 | XP_006649537.1PREDICTED: uncharacterized protein LOC102720124                       |
| TCONS_00004432 | -0.000901371 | -4.4862    | -0.490162   | BGIOSGA002848 | XP_006646341.1PREDICTED: uncharacterized protein LOC102718327                       |
| TCONS_00022724 | -0.000729097 | -0.132074  | 0.0353728   | BGIOSGA020728 | XP_003577500.1probable Xaa-Pro aminopeptidase P                                     |
| TCONS_00007426 | -0.000602723 | 0.929482   | 0.487328    | BGIOSGA007051 | XP_006647411.1 F-box/kelch-repeat protein At1g22040-like                            |
| TCONS_00037140 | -0.000234566 | 0.834379   | 0.112012    | BGIOSGA036234 | XP_006664540.2 iron-sulfur cluster co-chaperone protein HscB, mitochondrial         |
| TCONS_00028547 | -0.000153597 | 0.999479   | 0.49052     | BGIOSGA009236 | XP_004964736.1ribonucleoside-diphosphate reductase large subunit                    |
| TCONS_00005039 | 8.22606E-06  | 0.837626   | 0.130559    | BGIOSGA004092 | XP_004971179.1autophagy-related protein 18a                                         |
| TCONS_00018817 | 0.00017305   | 0.718361   | -0.506843   | BGIOSGA018600 | XP_015693365.1 mannosyl-oligosaccharide 1,2-alpha-mannosidase MNS3                  |
| TCONS_00015748 | 0.000311492  | 0.216869   | 0.59471     | BGIOSGA015230 | XP_015692084.1 eukaryotic translation initiation factor 3 subunit H-like isoform X1 |
| TCONS_00004203 | 0.000479438  | 0.370069   | 0.243324    | BGIOSGA020321 | XP_003567006.2ras/Rap GTPase-activating protein SynGAP                              |
| TCONS_00023870 | 0.000479725  | -0.0388338 | -1.00521    | BGIOSGA011174 | XP_006657807.1 chitin-inducible gibberellin-responsive protein 1                    |
| TCONS_00008280 | 0.000773412  | -2.55832   | -1.81292    | BGIOSGA006148 | XP_004956139.1lecithin-cholesterol acyltransferase-like 1                           |
| TCONS_00006366 | 0.000866042  | -1.65009   | -2.84196    | BGIOSGA008528 | XP_006647444.1 inorganic phosphate transporter 2-1, chloroplastic                   |
| TCONS_00005209 | 0.000953728  | -1.68115   | -1.0798     | BGIOSGA014366 | XP_003570757.1NDR1/HIN1-like protein 26                                             |
| TCONS_00026212 | 0.00102912   | -0.58171   | -3.07999    | BGIOSGA032723 | XP_006659244.1 probable LRR receptor-like serine/threonine-protein kinase At3g47570 |
| TCONS_00014385 | 0.00145273   | -0.964827  | -0.830316   | BGIOSGA010100 | XP_006652369.2 protease Do-like 8, chloroplastic                                    |
| TCONS_00034293 | 0.00166994   | -0.40453   | 0.284459    | BGIOSGA036643 | XP_006664333.1 long chain acyl-CoA synthetase 6, peroxisomal-like                   |
| TCONS_00020811 | 0.00170084   | -0.0958334 | 0.0388636   | BGIOSGA006745 | XP_006656129.1PREDICTED: uncharacterized protein LOC102709850                       |
| TCONS_00016627 | 0.00170305   | -0.772728  | -0.369721   | BGIOSGA014336 | XP_015691639.1 gamma-soluble NSF attachment protein                                 |
| TCONS_00006265 | 0.00191394   | -0.934557  | 0.262365    | BGIOSGA016459 | XP_006648736.1PREDICTED: uncharacterized protein LOC102721810                       |
| TCONS_00031670 | 0.00192812   | -0.743111  | -0.43831    | BGIOSGA033491 | XP_004983570.1uncharacterized protein At2g38710                                     |
| TCONS_00008159 | 0.00216248   | 0.583431   | 0.0184645   | BGIOSGA037527 | XP_021310923.1coleoptile phototropism protein 1                                     |
| TCONS_00008453 | 0.0021718    | 0.554354   | -0.060495   | BGIOSGA026163 | XP_006647575.1 putative GEM-like protein 8                                          |
| TCONS_00013487 | 0.00219511   | 0.342039   | -0.300695   | BGIOSGA009504 | XP_006650854.1 squamosa promoter-binding-like protein 6                             |
| TCONS_00008457 | 0.00223191   | 0.15374    | -0.382574   | BGIOSGA005970 | XP_006648871.1PREDICTED: uncharacterized protein LOC102720772 isoform X1            |
| TCONS_00011129 | 0.00224172   | -0.366847  | 0.764894    | BGIOSGA006236 | XP_004981425.1transcription factor UNE12                                            |
| TCONS_00017881 | 0.00235168   | 0.0891316  | 0.307642    | BGIOSGA006726 | XP_006654458.1 protein LIKE COV 2-like                                              |
| TCONS_00018012 | 0.00255578   | -1.07949   | 0.181657    | BGIOSGA000591 | XP_006654550.1 probable LRR receptor-like serine/threonine-protein kinase At1g06840 |
| TCONS_00027976 | 0.00263961   | 0.697093   | -0.0900597  | BGIOSGA014488 | XP_015696021.1 ABC transporter A family member 2                                    |
| TCONS_00006395 | 0.0026436    | 0.243057   | 0.435392    | BGIOSGA008552 | XP_015689345.1 telomere length regulation protein TEL2 homolog                      |
| TCONS_00006230 | 0.00281549   | 0.132129   | 0.204861    | BGIOSGA008392 | XP_006648718.1 WD repeat domain-containing protein 83                               |
| TCONS_00029788 | 0.00293405   | 0.375342   | 0.270854    | BGIOSGA025431 | XP_015696294.1 probable NAD(P)H dehydrogenase subunit CRR3, chloroplastic           |
| TCONS_00003051 | 0.00296018   | -0.173782  | -1.75114    | BGIOSGA023409 | XP_004968566.1protein GRAVITROPIC IN THE LIGHT 1                                    |
| TCONS_00003286 | 0.0030122    | 0.349806   | -0.126712   | BGIOSGA021271 | XP_006649997.1 calmodulin                                                           |
| TCONS_00025449 | 0.00309402   | 0.214598   | 0.819228    | BGIOSGA023980 | XP_006657905.1 FRIGIDA-like protein 3                                               |
| TCONS_00017878 | 0.00343722   | 0.297841   | 0.448075    | BGIOSGA006601 | XP_015692420.1 signal peptide peptidase 2-like                                      |
| TCONS_00019207 | 0.00353164   | -0.561163  | -0.00838811 | BGIOSGA018141 | XP_006655269.2 AP-3 complex subunit mu                                              |

transcriptome

|                |            |            |            |               |                                                                                             |
|----------------|------------|------------|------------|---------------|---------------------------------------------------------------------------------------------|
| TCONS_00036425 | 0.00386794 | -2.28655   | -0.443813  | BGIOSGA003109 | XP_024312685.1wall-associated receptor kinase 5 isoform X1                                  |
| TCONS_00024284 | 0.00416118 | -1.0368    | -0.916671  | BGIOSGA026328 | XP_006658074.1 4-alpha-glucanotransferase DPE2                                              |
| TCONS_00017415 | 0.00424028 | -1.8874    | -0.0808275 | BGIOSGA028165 | XP_021321454.1probable LRR receptor-like serine/threonine-protein kinase At1g56130          |
| TCONS_00017117 | 0.00425386 | -0.649022  | -0.761398  | BGIOSGA001130 | XP_006654030.1 mitogen-activated protein kinase 14                                          |
| TCONS_00032391 | 0.00428375 | 0.777638   | 0.248567   | BGIOSGA031732 | XP_015697177.1 54S ribosomal protein L19, mitochondrial                                     |
| TCONS_00036519 | 0.00428981 | 0.678564   | 1.0737     | BGIOSGA005293 | XP_008662745.1NEDD8-specific protease 1                                                     |
| TCONS_00003184 | 0.00436513 | -1.04184   | -0.797335  | BGIOSGA019463 | XP_004967339.1triose phosphate/phosphate translocator, chloroplastic                        |
| TCONS_00010703 | 0.00445109 | 0.865124   | 0.875147   | BGIOSGA013327 | XP_006650406.1 phosphomethylpyrimidine synthase, chloroplastic isoform X1                   |
| TCONS_00010284 | 0.00445271 | -2.43447   | -1.3029    | #N/A          | #N/A                                                                                        |
| TCONS_00007128 | 0.00458435 | -0.275372  | 0.071848   | BGIOSGA009312 | XP_006648141.1 proline-rich receptor-like protein kinase PERK14                             |
| TCONS_00018643 | 0.0046251  | 0.450789   | 0.395839   | BGIOSGA033114 | XP_006655000.1 histidine-tRNA ligase, cytoplasmic                                           |
| TCONS_00032589 | 0.00462578 | 0.144244   | -0.215811  | BGIOSGA031526 | XP_006661973.1 post-GPI attachment to proteins factor 3-like                                |
| TCONS_00000459 | 0.00466147 | -0.0337589 | 0.30323    | BGIOSGA002717 | XP_006645654.1 mitochondrial carrier protein MTM1-like                                      |
| TCONS_00024148 | 0.0051153  | 0.383266   | -0.1547    | BGIOSGA026185 | XP_015695220.1 E3 ubiquitin-protein ligase RKP                                              |
| TCONS_00027045 | 0.00523736 | 0.0805611  | 0.0237647  | #N/A          | #N/A                                                                                        |
| TCONS_00009248 | 0.00526193 | 0.70131    | 0.00547993 | BGIOSGA026900 | XP_006649341.1 4-coumarate-CoA ligase-like 4                                                |
| TCONS_00025612 | 0.00540047 | 0.472513   | 1.46092    | BGIOSGA004230 | XP_006658042.1 pre-mRNA-splicing factor SYF1                                                |
| TCONS_00015233 | 0.00551449 | 0.0790626  | 0.729292   | BGIOSGA017419 | XP_006653923.2 farnesylcysteine lyase isoform X1                                            |
| TCONS_00022860 | 0.00553435 | 1.01815    | -1.4018    | BGIOSGA020585 | XP_003560515.1cation transporter HKT1                                                       |
| TCONS_00023338 | 0.00566578 | 1.18312    | 0.609079   | BGIOSGA025379 | XP_006657553.1 dolichyl-diphosphooligosaccharide-protein glycosyltransferase 48 kDa subunit |
| TCONS_00031638 | 0.00583228 | -0.473602  | 0.0662507  | BGIOSGA033454 | XP_006662610.1 RNA-binding KH domain-containing protein PEPPEP                              |
| TCONS_00015499 | 0.00598404 | -0.300029  | -1.94686   | BGIOSGA016280 | XP_006652131.1 heavy metal-associated isoprenylated plant protein 26-like                   |
| TCONS_00020371 | 0.00609019 | -0.224936  | 0.114285   | BGIOSGA021098 | XP_006656789.1 5'-adenylylsulfate reductase-like 2                                          |
| TCONS_00000443 | 0.00626305 | -0.564485  | -0.448325  | BGIOSGA024948 | XP_006643913.1 vesicle transport protein SFT2B                                              |
| TCONS_00032604 | 0.00627799 | -1.76649   | -0.795684  | BGIOSGA005168 | XP_006661987.1 probable glutathione S-transferase GSTU6                                     |
| TCONS_00019389 | 0.00639249 | 0.225381   | 0.275438   | BGIOSGA016362 | XP_004961931.1protein transport protein sec24                                               |
| TCONS_00027286 | 0.00648323 | -0.200537  | 0.253903   | BGIOSGA000054 | XP_006659086.1 actin-related protein 3-like                                                 |
| TCONS_00006758 | 0.00688551 | 0.827101   | 0.434616   | BGIOSGA008928 | XP_006648992.2 probable glucosamine 6-phosphate N-acetyltransferase 2                       |
| TCONS_00021572 | 0.00692212 | 1.28532    | 0.428855   | BGIOSGA023979 | XP_006655770.1PREDICTED: uncharacterized protein LOC102722126                               |
| TCONS_00002446 | 0.00711101 | 0.221719   | 0.295375   | BGIOSGA005089 | XP_006646631.1 delta(3,5)-Delta(2,4)-dienoyl-CoA isomerase, peroxisomal                     |
| TCONS_00016949 | 0.00731571 | 0.383996   | 0.776153   | BGIOSGA003286 | XP_004960938.1photosynthetic NDH subunit of luminal location 5, chloroplastic               |
| TCONS_00001449 | 0.00752714 | 0.479843   | 0.429287   | BGIOSGA007662 | XP_004969283.1HD domain-containing protein 2 homolog                                        |
| TCONS_00030302 | 0.00752855 | -3.4968    | 0.225719   | BGIOSGA029506 | XP_003578366.1protein MANNAN SYNTHESIS-RELATED 1 isoform X1                                 |
| TCONS_00024886 | 0.00753803 | -0.312696  | 0.659345   | BGIOSGA015647 | XP_015696506.1 protein argonaute 16                                                         |
| TCONS_00008768 | 0.00755717 | 0.394438   | 0.597732   | BGIOSGA023562 | XP_006649025.1 E3 ubiquitin protein ligase RIE1-like                                        |
| TCONS_00017250 | 0.00766149 | 0.483891   | 0.59853    | BGIOSGA016798 | XP_006654117.1PREDICTED: uncharacterized protein LOC102713358                               |
| TCONS_00000309 | 0.00767643 | -0.92958   | -0.342537  | BGIOSGA002884 | XP_015696859.1 transmembrane protein 19                                                     |
| TCONS_00016195 | 0.00780711 | 0.678634   | 0.325789   | BGIOSGA006056 | XP_020401239.1enolase-phosphatase E1                                                        |
| TCONS_00012516 | 0.00788403 | 0.317872   | -0.604756  | BGIOSGA012067 | XP_006650237.1 probable esterase D14L                                                       |
| TCONS_00003827 | 0.00789194 | -0.780875  | 0.25264    | BGIOSGA001388 | XP_006644259.1PREDICTED: uncharacterized protein LOC102701212                               |
| TCONS_00027994 | 0.00791144 | -0.177937  | -1.4351    | BGIOSGA022213 | NP_001140351.1uncharacterized protein LOC100272399                                          |
| TCONS_00024053 | 0.00816407 | 1.73121    | 0.946613   | BGIOSGA026089 | XP_004958238.1pentatricopeptide repeat-containing protein PNM1, mitochondrial               |
| TCONS_00022898 | 0.00820747 | -0.503816  | 0.612532   | BGIOSGA008494 | XP_006656482.1 MADS-box transcription factor 16                                             |
| TCONS_00009350 | 0.00826699 | 0.833848   | -0.0779771 | BGIOSGA010658 | XP_003558775.1phosphoserine aminotransferase 1, chloroplastic                               |
| TCONS_00008849 | 0.00838214 | -0.108051  | -0.579107  | BGIOSGA004369 | XP_015688940.1 putative 4-hydroxy-4-methyl-2-oxoglutarate aldolase 2                        |
| TCONS_00030763 | 0.00853175 | -0.487937  | -0.19745   | BGIOSGA003728 | XP_021306844.1disease resistance protein RPM1                                               |
| TCONS_00008924 | 0.00872522 | -0.596013  | 0.302013   | BGIOSGA021098 | XP_006648011.1PREDICTED: uncharacterized protein LOC102712504 isoform X1                    |
| TCONS_00004393 | 0.00895731 | -0.306705  | -0.943982  | BGIOSGA004967 | XP_006644703.1 serine/threonine-protein kinase TNNI3K-like                                  |
| TCONS_00001498 | 0.00912264 | -0.139461  | -0.385635  | BGIOSGA035444 | XP_004969353.1long chain acyl-CoA synthetase 4 isoform X2                                   |
| TCONS_00006856 | 0.00918598 | 0.553845   | 0.314806   | BGIOSGA021603 | XP_015689295.1 serine/threonine-protein kinase CTR1-like                                    |
| TCONS_00009690 | 0.00920576 | -0.311343  | -0.678742  | BGIOSGA017806 | XP_003558346.1UDP-glucuronate 4-epimerase 3                                                 |
| TCONS_00001489 | 0.00923793 | 0.265241   | 0.458737   | BGIOSGA011422 | XP_004981468.1uncharacterized protein LOC101783491                                          |

transcriptome

|                |            |           |            |               |                                                                                             |
|----------------|------------|-----------|------------|---------------|---------------------------------------------------------------------------------------------|
| TCONS_00013252 | 0.00935917 | -1.44553  | -1.37541   | BGIOSGA009736 | XP_006650668.1 5'-nucleotidase domain-containing protein 4 isoform X1                       |
| TCONS_00028982 | 0.00936201 | -0.694683 | -0.611646  | BGIOSGA030741 | XP_006661218.2 transcription initiation factor TFIIID subunit 2 isoform X1                  |
| TCONS_00034672 | 0.00937067 | -0.731129 | -1.26924   | BGIOSGA022950 | XP_021302975.1 probable serine/threonine-protein kinase PBL28                               |
| TCONS_00016762 | 0.00949458 | 0.969894  | 1.11307    | BGIOSGA014202 | XP_004960253.1 peptidyl-tRNA hydrolase 2, mitochondrial                                     |
| TCONS_00008229 | 0.00952589 | 0.892356  | 0.879986   | BGIOSGA008410 | XP_006648771.1 protein indeterminate-domain 13-like                                         |
| TCONS_00011240 | 0.00954077 | -0.377572 | 0.429381   | BGIOSGA032009 | XP_006650809.2 protein kinase APK1A, chloroplastic-like isoform X2                          |
| TCONS_00018825 | 0.00978108 | 0.495662  | 0.775447   | BGIOSGA018593 | XP_015693362.1 LRR receptor-like serine/threonine-protein kinase EFR                        |
| TCONS_00006738 | 0.00981395 | -1.13523  | -1.26521   | BGIOSGA007345 | XP_006648979.1 PREDICTED: uncharacterized protein At1g26090, chloroplastic                  |
| TCONS_00022978 | 0.00994827 | -3.56891  | 0.0118275  | BGIOSGA034398 | XP_006658206.2 dirigent protein 1-like                                                      |
| TCONS_00023785 | 0.00999547 | -0.157236 | 0.13777    | BGIOSGA013261 | XP_006657768.1 protein LHCP                                                                 |
| TCONS_00036232 | 0.0100926  | 0.0615822 | 1.15112    | BGIOSGA037591 | TRANSLOCATION DEFECT                                                                        |
| TCONS_00024410 | 0.0103295  | -0.242781 | 0.456278   | BGIOSGA026449 | XP_004962771.1 uncharacterized protein LOC101771063                                         |
| TCONS_00013173 | 0.0105189  | 0.984911  | 0.961594   | BGIOSGA009811 | XP_015695164.1 symplekin isoform X2                                                         |
| TCONS_00025152 | 0.0106842  | -0.306953 | -0.487187  | BGIOSGA024258 | XP_003559631.1 protein NDH-DEPENDENT CYCLIC ELECTRON FLOW 5                                 |
| TCONS_00017990 | 0.0107057  | 1.21574   | 0.193637   | BGIOSGA012615 | XP_021309726.1 DSC E3 ubiquitin ligase complex subunit 1-like                               |
| TCONS_00031840 | 0.0107579  | 0.107988  | 0.27674    | BGIOSGA021723 | XP_006654538.2 protein RETICULATA-RELATED 5, chloroplastic-like                             |
| TCONS_00018708 | 0.0107752  | 0.445371  | 1.09928    | BGIOSGA032637 | XP_006662182.1 F-box/LRR-repeat protein 4-like                                              |
| TCONS_00029933 | 0.0108636  | -0.288858 | 0.397883   | BGIOSGA029877 | XP_004962938.3 F-box protein At5g07610                                                      |
| TCONS_00007044 | 0.0109531  | 1.28288   | 0.846071   | BGIOSGA009228 | XP_015696473.1 putative F-box protein At4g21240                                             |
| TCONS_00025172 | 0.0112424  | 0.953772  | 0.784472   | BGIOSGA014371 | XP_003570332.1 protein diaphanous homolog 1                                                 |
| TCONS_00009151 | 0.0112484  | 0.772829  | -0.0088079 | BGIOSGA006054 | XP_015695363.1 probable potassium transporter 14                                            |
| TCONS_00007114 | 0.0112786  | -0.99664  | 0.659416   | BGIOSGA038246 | XP_004986049.1 probable glucuronosyltransferase Os03g0107900                                |
| TCONS_00013381 | 0.011289   | 0.429422  | 1.45323    | BGIOSGA009604 | XP_006648122.1 PREDICTED: uncharacterized protein Ytol-like isoform X2                      |
| TCONS_00021591 | 0.0114802  | 0.283272  | 0.443579   | BGIOSGA022076 | XP_006650763.1 PREDICTED: uncharacterized protein LOC102721533                              |
| TCONS_00010070 | 0.0116452  | 0.620578  | 0.266041   | BGIOSGA023751 | XP_006646013.2 protein EARLY FLOWERING 3-like isoform X1                                    |
| TCONS_00001338 | 0.0116551  | 0.30895   | -0.0143003 | BGIOSGA003970 | XP_002467862.1 zinc finger protein CONSTANS-LIKE 13                                         |
| TCONS_00002011 | 0.0117032  | 0.0580939 | 0.736702   | BGIOSGA004641 | NP_001149665.1 vacuolar ATP synthase 21 kDa proteolipid subunit                             |
| TCONS_00005889 | 0.0120367  | -0.226249 | 0.289562   | BGIOSGA037567 | XP_006644868.1 psbP domain-containing protein 6, chloroplastic isoform X1                   |
| TCONS_00036503 | 0.0122258  | 0.185415  | 0.592116   | BGIOSGA037872 | XP_006647192.1 eukaryotic translation initiation factor 1A-like                             |
| TCONS_00036215 | 0.0122448  | -1.37913  | 0.386315   | BGIOSGA030851 | XP_006664245.1 protein NUCLEAR FUSION DEFECTIVE 4                                           |
| TCONS_00012853 | 0.0122456  | -1.05356  | -0.31105   | BGIOSGA010120 | XP_002459541.1 probable galactinol--sucrose galactosyltransferase 2                         |
| TCONS_00010731 | 0.012307   | 2.02956   | 1.57491    | BGIOSGA038809 | XP_015690389.1 protein disulfide-isomerase LQY1, chloroplastic                              |
| TCONS_00024668 | 0.0123517  | -1.28743  | 0.722868   | BGIOSGA009645 | XP_006651701.1 heterogeneous nuclear ribonucleoprotein A1, A2/B1 homolog                    |
| TCONS_00006619 | 0.0123826  | 0.608969  | 0.548478   | BGIOSGA020414 | XP_006657502.1 PREDICTED: uncharacterized protein LOC102722972                              |
| TCONS_00034678 | 0.012498   | -1.18452  | -0.671273  | BGIOSGA034152 | XP_006647666.1 amino acid transporter ANTL1-like                                            |
| TCONS_00007585 | 0.012715   | -0.737783 | 0.263106   | BGIOSGA034758 | XP_006662900.2 ATP-dependent (S)-NAD(P)-hydrate dehydratase                                 |
| TCONS_00009725 | 0.012845   | -0.372319 | -0.266254  | BGIOSGA029299 | XP_015689065.1 caffeoylshikimate esterase-like                                              |
| TCONS_00010229 | 0.013168   | -0.285961 | 0.123891   | BGIOSGA023897 | XP_004984704.1 mitochondrial phosphate carrier protein 3, mitochondrial                     |
| TCONS_00029211 | 0.013225   | 1.59691   | 1.15559    | BGIOSGA027972 | XP_015690206.1 ADP-ribosylation factor-related protein 1-like                               |
| TCONS_00026757 | 0.0133557  | 1.0903    | 0.642485   | BGIOSGA030881 | XP_021309231.1 pentatricopeptide repeat-containing protein At3g62890                        |
| TCONS_00008657 | 0.0133568  | -1.98145  | -3.65783   | BGIOSGA013424 | XP_015695633.1 mediator-associated protein 1-like                                           |
| TCONS_00004572 | 0.0133882  | -0.838656 | 0.146448   | BGIOSGA005137 | XP_015689029.1 pheophytinase, chloroplastic                                                 |
| TCONS_00019612 | 0.0134424  | -1.11386  | -1.16689   | BGIOSGA023596 | XP_015688170.1 probable glycerol-3-phosphate dehydrogenase [NAD(+)] 2, cytosolic isoform X1 |
| TCONS_00025331 | 0.0134486  | -1.01001  | -3.14471   | BGIOSGA024098 | XP_006654626.1 general transcription factor IIF subunit 2-like                              |
| TCONS_00025699 | 0.0134555  | -0.743291 | -0.307145  | BGIOSGA005715 | XP_015694685.1 putative PAP-specific phosphatase, mitochondrial                             |
| TCONS_00006920 | 0.0135892  | -0.308054 | 0.0504382  | BGIOSGA009104 | XP_024315124.1 tyrosine--tRNA ligase 1, cytoplasmic isoform X1                              |
| TCONS_00001812 | 0.0137725  | 0.197003  | 0.334737   | BGIOSGA004448 | XP_015688744.1 galactoside 2-alpha-L-fucosyltransferase-like                                |
| TCONS_00004154 | 0.0139281  | 0.0530064 | 0.0165898  | BGIOSGA022076 | XP_015688182.1 nuclear pore complex protein NUP85                                           |
| TCONS_00025559 | 0.0141759  | -0.114788 | -0.846794  | BGIOSGA009047 | XP_015699143.1 callose synthase 12-like                                                     |
| TCONS_00014799 | 0.0142005  | -0.736594 | 0.0610347  | BGIOSGA008813 | XP_006657988.1 sphinganine C4-monooxygenase 1-like isoform X2                               |
| TCONS_00023582 | 0.0144608  | -0.736921 | 0.0252021  | BGIOSGA025558 | XP_006652676.1 rho GTPase-activating protein 5-like                                         |
|                |            |           |            |               | XP_010230263.1 F-box/FBD/LRR-repeat protein At1g13570                                       |

transcriptome

|                |           |            |            |               |                                                                                            |
|----------------|-----------|------------|------------|---------------|--------------------------------------------------------------------------------------------|
| TCONS_00017012 | 0.0145827 | 0.183701   | 0.092039   | BGIOSGA019058 | XP_006654921.2 UDP-galactose/UDP-glucose transporter 5                                     |
| TCONS_00029526 | 0.0146037 | 1.06909    | 0.0001347  | BGIOSGA033775 | XP_006661554.1 delta(14)-sterol reductase                                                  |
| TCONS_00027150 | 0.0146578 | -0.172951  | -2.261     | BGIOSGA010019 | XP_006659703.1 protein DMR6-LIKE OXYGENASE 1                                               |
| TCONS_00010011 | 0.0148297 | 0.424868   | 0.0985471  | BGIOSGA016565 | XP_003557976.1receptor-like protein kinase FERONIA                                         |
| TCONS_00005464 | 0.0148425 | -0.0192422 | -0.425509  | BGIOSGA020204 | XP_006646904.1PREDICTED: uncharacterized protein LOC102716841                              |
| TCONS_00011900 | 0.0151291 | -0.480292  | -0.32214   | BGIOSGA022770 | XP_006649742.1 autophagy-related protein 9-like                                            |
| TCONS_00007222 | 0.01517   | 1.40118    | 0.689538   | BGIOSGA007269 | XP_006646772.2 pentatricopeptide repeat-containing protein At2g37230                       |
| TCONS_00003166 | 0.0153239 | 0.365944   | -0.533885  | BGIOSGA016842 | XP_006643963.1 exportin-2                                                                  |
| TCONS_00033174 | 0.0154743 | -1.40594   | 0.471894   | BGIOSGA034298 | XP_015697973.1 serine/threonine-protein kinase TAO2-like                                   |
| TCONS_00031968 | 0.0156336 | -0.0833557 | -0.0852442 | BGIOSGA003551 | XP_006662254.1 probable E3 ubiquitin-protein ligase LUL2                                   |
| TCONS_00035735 | 0.0156347 | -1.18345   | -2.95715   | BGIOSGA025191 | XP_021321592.1zinc-finger homeodomain protein 3                                            |
| TCONS_00025121 | 0.015649  | -0.77906   | -3.64197   | BGIOSGA007428 | XP_022680328.1monooxygenase 3-like                                                         |
| TCONS_00020759 | 0.0160114 | -1.34037   | -0.334286  | BGIOSGA022957 | XP_015693423.1 paired amphipathic helix protein Sin3-like 2                                |
| TCONS_00030367 | 0.016071  | 0.668871   | 0.204988   | BGIOSGA040472 | XP_006660849.1 acyl-coenzyme A thioesterase 9, mitochondrial                               |
| TCONS_00025532 | 0.0163879 | 0.0981742  | 0.401884   | BGIOSGA030815 | XP_006657960.1 alanine aminotransferase 2-like isoform X1                                  |
| TCONS_00002270 | 0.0164545 | -1.5771    | 0.632954   | BGIOSGA000267 | XP_015690541.1 dnaJ protein homolog 1-like                                                 |
| TCONS_00002890 | 0.0165499 | -1.64545   | -1.07981   | BGIOSGA002328 | XP_006645527.2 probable protein phosphatase 2C 1                                           |
| TCONS_00036258 | 0.0165552 | 0.842354   | 0.479889   | BGIOSGA010932 | XP_006664116.1 importin subunit beta-1                                                     |
| TCONS_00021213 | 0.0166148 | 0.862968   | 0.461576   | BGIOSGA027463 | XP_006656351.1 nuclear transcription factor Y subunit C-2-like                             |
| TCONS_00024419 | 0.0166425 | 1.06652    | 0.995057   | BGIOSGA038100 | XP_015695217.1 telomeric repeat-binding factor 2-like                                      |
| TCONS_00001597 | 0.0168194 | 2.03715    | 0.632047   | BGIOSGA004233 | XP_006644558.1 methionyl-tRNA formyltransferase                                            |
| TCONS_00036109 | 0.0168194 | 0.329331   | -0.660735  | BGIOSGA012053 | XP_006664586.1 protein CLT2, chloroplastic                                                 |
| TCONS_00031457 | 0.0168393 | 0.830161   | 0.320342   | BGIOSGA025623 | XP_004982612.1cytochrome P450 89A2                                                         |
| TCONS_00015106 | 0.016873  | -0.185417  | 0.341704   | BGIOSGA028463 | XP_006660775.1 protein EMSY-LIKE 3-like isoform X1                                         |
| TCONS_00006716 | 0.0169237 | -0.160284  | 0.149878   | BGIOSGA008885 | XP_006647758.1 lipid phosphate phosphatase epsilon 1, chloroplastic-like                   |
| TCONS_00026983 | 0.0169257 | -0.643906  | 1.47062    | BGIOSGA029032 | XP_015695814.1 ankyrin repeat and SAM domain-containing protein 6-like                     |
| TCONS_00013341 | 0.0169373 | 0.430258   | 0.749079   | BGIOSGA009643 | XP_006650731.1 light-inducible protein CPRF2-like                                          |
| TCONS_00013135 | 0.0169453 | -2.69265   | 0.246881   | BGIOSGA014799 | XP_006650552.1 endoglucanase 10                                                            |
| TCONS_00008489 | 0.0171823 | -1.1995    | -1.41067   | BGIOSGA002861 | XP_006647607.1 probable receptor-like protein kinase At4g10390                             |
| TCONS_00031312 | 0.0172459 | 0.76245    | 0.358762   | BGIOSGA006974 | XP_006661862.1 probable serine/threonine protein phosphatase 2A regulatory subunit B"delta |
| TCONS_00033610 | 0.0173804 | 0.00794248 | 0.376867   | BGIOSGA037972 | XP_008676643.1citrate synthase isoform X1                                                  |
| TCONS_00002232 | 0.0174003 | -0.533897  | 0.408213   | BGIOSGA019905 | XP_004953713.1tyrosine--tRNA ligase 1, cytoplasmic                                         |
| TCONS_00026556 | 0.0174032 | 0.193953   | -0.0827949 | BGIOSGA031747 | XP_006659381.1 hypersensitive-induced response protein 1-like                              |
| TCONS_00008992 | 0.0175504 | -0.0976514 | 0.175481   | BGIOSGA005245 | XP_006648068.1 vacuolar protein sorting-associated protein 55 homolog                      |
| TCONS_00035743 | 0.0175694 | -2.35611   | 0.595421   | BGIOSGA037154 | XP_006663902.1 2-dehydro-3-deoxyphosphooctonate aldolase 1                                 |
| TCONS_00010183 | 0.017634  | 1.84768    | 1.59526    | BGIOSGA020069 | XP_004984217.1probable apyrase 6                                                           |
| TCONS_00027807 | 0.0176732 | 0.549146   | -0.456846  | BGIOSGA023222 | XP_006659301.1 rubredoxin                                                                  |
| TCONS_00004529 | 0.0177126 | -0.408759  | -0.0900609 | BGIOSGA029777 | XP_006644815.1 transcription factor bHLH123-like                                           |
| TCONS_00034651 | 0.017728  | -1.25678   | -0.303093  | BGIOSGA034178 | XP_006662911.1PREDICTED: uncharacterized protein LOC102706508                              |
| TCONS_00025169 | 0.0177514 | 0.792834   | 0.768186   | BGIOSGA031778 | XP_015695241.1 pre-mRNA-splicing factor ATP-dependent RNA helicase DEAH7                   |
| TCONS_00009061 | 0.0178915 | -0.790413  | 0.771992   | BGIOSGA005343 | XP_015688929.1PREDICTED: uncharacterized protein LOC102722654                              |
| TCONS_00009100 | 0.017921  | -0.46525   | -0.282451  | BGIOSGA013699 | XP_015689290.1 protein argonate 1C isoform X2                                              |
| TCONS_00004224 | 0.0180502 | 1.03328    | 1.01543    | BGIOSGA000980 | XP_002458353.1threonine synthase, chloroplastic                                            |
| TCONS_00027432 | 0.018077  | -0.0571638 | -0.0268323 | BGIOSGA010867 | XP_006659172.1 AP2-like ethylene-responsive transcription factor PLT2                      |
| TCONS_00024071 | 0.0181097 | -0.493895  | -1.8245    | BGIOSGA022835 | XP_002460999.1uncharacterized protein LOC8060668                                           |
| TCONS_00018731 | 0.0181151 | -0.247976  | -0.156721  | BGIOSGA027214 | XP_006654109.2 phosphatidylinositol 3-kinase, root isoform                                 |
| TCONS_00032675 | 0.0182997 | -1.87898   | -0.93105   | BGIOSGA025033 | XP_004983701.1flavin-containing monooxygenase FMO GS-OX-like 2                             |
| TCONS_00002871 | 0.0183825 | -0.444367  | -0.147334  | BGIOSGA018753 | XP_006643778.1 E3 ubiquitin-protein ligase MBR2-like                                       |
| TCONS_00024943 | 0.0185008 | 0.0411465  | 0.234537   | BGIOSGA022030 | XP_006658485.1 endoplasmic reticulum metalloproteinase 1 isoform X1                        |
| TCONS_00013606 | 0.0186414 | 0.037387   | 0.0539746  | BGIOSGA015760 | XP_006652085.1 arginase 1, mitochondrial                                                   |
| TCONS_00030232 | 0.0186614 | -0.260513  | 0.23314    | BGIOSGA004722 | XP_022680444.1probable WRKY transcription factor 2                                         |
| TCONS_00008728 | 0.018763  | 0.829039   | 0.0235483  | BGIOSGA005705 | NP_001132348.1uncharacterized LOC100193791                                                 |
| TCONS_00019234 | 0.0187907 | 0.511622   | 0.126397   | BGIOSGA018114 | XP_006655283.1 E3 ubiquitin-protein ligase KEG                                             |



## transcriptome

|                |           |              |            |               |                                                                                     |
|----------------|-----------|--------------|------------|---------------|-------------------------------------------------------------------------------------|
| TCONS_00028989 | 0.0188104 | -0.204065    | 0.15865    | BGIOSGA006187 | XP_003578110.1 uncharacterized protein LOC100834851                                 |
| TCONS_00000223 | 0.0188762 | -0.614363    | 0.477808   | BGIOSGA014973 | XP_006645503.2 PREDICTED: uncharacterized protein LOC102717201                      |
| TCONS_00017508 | 0.0188853 | -0.615263    | -0.119314  | BGIOSGA019581 | XP_006654245.1 transcription factor IIIB 60 kDa subunit-like isoform X2             |
| TCONS_00007003 | 0.0189301 | -0.504927    | 0.297511   | BGIOSGA027337 | XP_015689599.1 probable E3 ubiquitin-protein ligase XBOS32 isoform X2               |
| TCONS_00001227 | 0.0189497 | -0.804731    | -0.469103  | BGIOSGA003855 | XP_010231954.1 nitrate regulatory gene2 protein isoform X1                          |
| TCONS_00014649 | 0.0189913 | -0.91497     | 0.073031   | BGIOSGA037014 | XP_006652554.1 syntaxin-81                                                          |
| TCONS_00012533 | 0.0192452 | 0.453599     | -0.15475   | BGIOSGA010448 | XP_006650245.1 30S ribosomal protein S5                                             |
| TCONS_00015300 | 0.0194234 | 0.373362     | 0.725136   | BGIOSGA002841 | XP_006653121.2 aspartokinase 2, chloroplast-like isoform X2                         |
| TCONS_00003104 | 0.0194322 | 0.204881     | 0.276083   | BGIOSGA004136 | XP_006643912.1 histone-lysine N-methyltransferase ATX5-like                         |
| TCONS_00028742 | 0.0195002 | 0.302857     | -0.0554839 | BGIOSGA030494 | XP_015696545.1 peroxisome biogenesis protein 3-1-like                               |
| TCONS_00016176 | 0.0196771 | 0.896093     | 0.960295   | BGIOSGA037172 | XP_006652471.1 2-alkenal reductase (NADP(+)-dependent)-like                         |
| TCONS_00018200 | 0.0197402 | -0.55235     | 0.271362   | BGIOSGA017662 | XP_006654704.1 tRNA(His) guanylyltransferase 1-like isoform X2                      |
| TCONS_00025400 | 0.0197829 | 1.20355      | 0.0515401  | BGIOSGA024027 | XP_003562833.1 bet1-like protein At4g14600                                          |
| TCONS_00024949 | 0.0198797 | -1.16637     | -1.44591   | BGIOSGA000207 | XP_015695303.1 aspartokinase 2, chloroplast-like isoform X2                         |
| TCONS_00003284 | 0.0200068 | -0.530129    | 0.72915    | BGIOSGA001928 | XP_015693298.1 cell number regulator 5                                              |
| TCONS_00005105 | 0.020066  | 0.322222     | 0.0421883  | BGIOSGA018133 | XP_004971285.1 PH, RCC1 and FYVE domains-containing protein 1                       |
| TCONS_00001818 | 0.0200884 | -0.0318997   | 0.175219   | BGIOSGA004455 | XP_015688233.1 MACPF domain-containing protein CAD1                                 |
| TCONS_00025548 | 0.0202082 | -0.000513813 | -0.456274  | BGIOSGA014982 | XP_006657979.1 PREDICTED: uncharacterized protein LOC102718470                      |
| TCONS_00023160 | 0.0203008 | 0.109633     | 0.506956   | BGIOSGA000898 | XP_015695395.1 valine-tRNA ligase, chloroplast/ mitochondrial 2 isoform X1          |
| TCONS_00000463 | 0.0204524 | -0.277667    | 0.0279584  | BGIOSGA003038 | XP_006643931.2 PREDICTED: uncharacterized protein LOC102721964                      |
| TCONS_00015091 | 0.0204542 | -0.0288245   | 0.425947   | BGIOSGA011068 | XP_006652939.1 protein KAKU4                                                        |
| TCONS_00022401 | 0.0204838 | 0.260659     | 0.582495   | BGIOSGA010692 | XP_006643887.1 60S ribosomal protein L11                                            |
| TCONS_00017322 | 0.0205177 | -0.530886    | -0.186964  | BGIOSGA035199 | XP_015692511.1 mitochondrial dicarboxylate/tricarboxylate transporter DTC-like      |
| TCONS_00008077 | 0.0207345 | -0.0608314   | -1.06951   | BGIOSGA013671 | XP_006648672.1 WAS/WASL-interacting protein family member 3-like                    |
| TCONS_00032448 | 0.0208123 | 1.7968       | 1.48725    | BGIOSGA031671 | XP_004982826.1 uncharacterized protein LOC101780267                                 |
| TCONS_00015621 | 0.0208165 | 0.435943     | 0.569357   | BGIOSGA012430 | XP_006653269.2 pentatricopeptide repeat-containing protein At1g60770                |
| TCONS_00006682 | 0.0208469 | -0.75567     | -0.380136  | BGIOSGA036524 | XP_006648952.2 E3 ubiquitin-protein ligase RNF14-like isoform X1                    |
| TCONS_00026321 | 0.0209633 | -0.582765    | -0.641228  | BGIOSGA028404 | XP_014758889.1 putative disease resistance protein RGA3 isoform X2                  |
| TCONS_00018541 | 0.0209849 | -0.124626    | 0.223389   | BGIOSGA003052 | XP_006654948.2 PREDICTED: uncharacterized protein LOC102700148, partial             |
| TCONS_00023631 | 0.0212018 | -0.205893    | -0.969899  | BGIOSGA012037 | XP_006658539.1 ABC transporter B family member 28                                   |
| TCONS_00026604 | 0.0212625 | -1.44001     | 0.18399    | BGIOSGA028665 | XP_015695601.1 PREDICTED: uncharacterized protein LOC102718764                      |
| TCONS_00013389 | 0.0214576 | 0.627795     | 0.108486   | BGIOSGA009595 | XP_015690687.1 probable protein phosphatase 2C 55                                   |
| TCONS_00011513 | 0.0217687 | 0.514795     | 1.54849    | BGIOSGA007411 | XP_015690163.1 putative HVA22-like protein g                                        |
| TCONS_00023437 | 0.021798  | -0.465828    | -0.487366  | #N/A          | #N/A                                                                                |
| TCONS_00005425 | 0.0218185 | -0.534504    | 0.0179831  | BGIOSGA000187 | XP_006646880.1 DNA-binding protein BIN4                                             |
| TCONS_00007374 | 0.0220038 | -2.12902     | -0.973315  | BGIOSGA023514 | XP_015689441.1 tyrosine-sulfated glycopeptide receptor 1-like                       |
| TCONS_00002653 | 0.0223414 | -0.900714    | -0.586072  | BGIOSGA030202 | XP_010912729.1 cinnamoyl-CoA reductase 1                                            |
| TCONS_00027339 | 0.0223429 | 0.501237     | 0.289065   | BGIOSGA019219 | XP_006644248.1 PREDICTED: uncharacterized protein LOC102721967 isoform X1           |
| TCONS_00005110 | 0.0226394 | -0.687552    | -1.31031   | BGIOSGA029369 | XP_004971298.1 uncharacterized protein LOC101786750                                 |
| TCONS_00016389 | 0.0227429 | 0.0540057    | -0.129997  | BGIOSGA025702 | XP_015692404.1 PREDICTED: LOW QUALITY PROTEIN: uncharacterized protein LOC102716588 |
| TCONS_00018445 | 0.0228657 | 0.331102     | -0.130396  | BGIOSGA018451 | XP_006653928.1 PREDICTED: uncharacterized protein At4g28440-like                    |
| TCONS_00025117 | 0.0229027 | 0.706258     | -0.0749641 | BGIOSGA024285 | XP_006657716.1 COP9 signalosome complex subunit 7 isoform X2                        |
| TCONS_00007526 | 0.023149  | -0.55456     | -1.74065   | BGIOSGA013393 | XP_006648416.1 lipoygenase 2.3, chloroplast-like                                    |
| TCONS_00005269 | 0.0231876 | 0.399648     | -0.081669  | BGIOSGA004552 | XP_002439211.1 uncharacterized protein LOC8071260                                   |
| TCONS_00024741 | 0.0232386 | 0.250622     | 0.0205835  | BGIOSGA024634 | XP_006657547.1 probable Xaa-Pro aminopeptidase P                                    |
| TCONS_00012085 | 0.023282  | -0.245482    | -0.638237  | BGIOSGA010925 | XP_006649925.1 gamma-interferon-inducible lysosomal thiol reductase-like isoform X2 |
| TCONS_00001711 | 0.023356  | 0.19647      | 0.320375   | #N/A          | #N/A                                                                                |
| TCONS_00035874 | 0.0234106 | -1.03491     | 0.115613   | BGIOSGA036065 | XP_021321913.1 uncharacterized protein LOC8074247                                   |
| TCONS_00007746 | 0.023507  | 2.04916      | 1.13701    | BGIOSGA006736 | XP_006648524.2 U1 small nuclear ribonucleoprotein C-1                               |
| TCONS_00016041 | 0.0235904 | 0.238496     | -0.0496321 | BGIOSGA031211 | XP_006653495.1 FBD-associated F-box protein At1g66310-like                          |
| TCONS_00030458 | 0.0241115 | -0.0842951   | 0.658022   | BGIOSGA029343 | NP_001145190.2 uncharacterized protein LOC100278440                                 |
| TCONS_00031080 | 0.0241592 | -0.812571    | 0.111197   | #N/A          | #N/A                                                                                |
| TCONS_00009821 | 0.024255  | 0.767788     | 0.970958   | BGIOSGA023662 | XP_006649890.1 L-ascorbate peroxidase 1, cytosolic                                  |
| TCONS_00013979 | 0.0244644 | -0.173803    | -0.469366  | BGIOSGA013945 | XP_006652174.1 FACT complex subunit SPT16                                           |

transcriptome

|                |           |             |             |               |                                                                                           |
|----------------|-----------|-------------|-------------|---------------|-------------------------------------------------------------------------------------------|
| TCONS_00016093 | 0.0246743 | 1.47748     | -0.181131   | BGIOSGA006134 | XP_006652412.2 protein NBR1 homolog                                                       |
| TCONS_00005256 | 0.024726  | -0.358872   | 0.609857    | BGIOSGA007369 | XP_015689330.1 GPI mannosyltransferase 3                                                  |
| TCONS_00024404 | 0.0247617 | -1.3058     | -0.764811   | BGIOSGA017574 | XP_015695175.1 probable LRR receptor-like serine/threonine-protein kinase MRH1 isoform X2 |
| TCONS_00009754 | 0.0248028 | -0.653698   | -0.249636   | BGIOSGA023075 | XP_006664426.2 aquaporin NIP3-2-like                                                      |
| TCONS_00009624 | 0.0249988 | -0.341796   | -0.130458   | BGIOSGA012166 | XP_002465601.1 uncharacterized protein LOC8085242                                         |
| TCONS_00009047 | 0.0250317 | -0.377036   | -0.335379   | BGIOSGA012326 | XP_006648121.1 telomere-binding protein 1                                                 |
| TCONS_00016572 | 0.0250705 | -1.3104     | -1.2323     | BGIOSGA001448 | XP_015688595.1 phenolic glucoside malonyltransferase 1-like                               |
| TCONS_00003657 | 0.0258564 | -0.255377   | 0.20039     | BGIOSGA001547 | XP_006644218.1 transcription initiation factor TFIID subunit 6                            |
| TCONS_00022550 | 0.0260212 | 0.0603819   | -1.84665    | BGIOSGA004313 | XP_006644607.1 glycine dehydrogenase (decarboxylating) 2, mitochondrial                   |
| TCONS_00015884 | 0.0261158 | 0.381484    | 0.751861    | BGIOSGA015102 | XP_002466218.1 uncharacterized protein LOC8057075                                         |
| TCONS_00007356 | 0.0263372 | -2.25361    | -1.89704    | BGIOSGA016278 | XP_006648310.1 endoglucanase 5                                                            |
| TCONS_00032204 | 0.0266862 | 0.658799    | 0.334411    | BGIOSGA011933 | XP_022678934.1 carbon catabolite repressor protein 4 homolog 1                            |
| TCONS_00037403 | 0.0266988 | 1.15127     | -0.00642311 | BGIOSGA010279 | XP_015698749.1 asparagine synthetase domain-containing protein 1-like                     |
| TCONS_00000773 | 0.0267014 | -1.83959    | -0.78422    | BGIOSGA008017 | XP_006645815.2 putative disease resistance RPP13-like protein 3                           |
| TCONS_00028061 | 0.0267326 | -0.12488    | 0.327604    | BGIOSGA001194 | XP_006660154.1 polypyrimidine tract-binding protein homolog 1-like                        |
| TCONS_00010398 | 0.026776  | 0.663582    | 1.01964     | BGIOSGA037226 | XP_006650257.1 elongation factor G, mitochondrial                                         |
| TCONS_00014119 | 0.0267774 | 0.0281556   | -0.258514   | BGIOSGA012779 | XP_006652212.1 calmodulin-binding transcription activator 4                               |
| TCONS_00009681 | 0.0268454 | -1.61137    | 0.499387    | #N/A          | #N/A                                                                                      |
| TCONS_00016072 | 0.0270212 | -0.719876   | -1.42344    | BGIOSGA014908 | XP_004975926.1 WPP domain-interacting protein 1 isoform X3                                |
| TCONS_00012421 | 0.0270212 | -1.28378    | -0.0290999  | BGIOSGA026243 | XP_006658888.1 trafficking protein particle complex subunit 3                             |
| TCONS_00034534 | 0.0271124 | -2.21418    | -1.87638    | BGIOSGA027872 | XP_004979103.1 NAD(P)H-quinone oxidoreductase subunit T, chloroplastic                    |
| TCONS_00007117 | 0.0271856 | -0.54425    | 0.0802583   | BGIOSGA029467 | XP_006648124.1 probable protein S-acyltransferase 15                                      |
| TCONS_00029766 | 0.0272318 | -1.54757    | 0.221804    | BGIOSGA030678 | XP_015696286.1 bifunctional aspartokinase/homoserine dehydrogenase 2, chloroplastic       |
| TCONS_00033085 | 0.027255  | -0.238334   | -0.857725   | BGIOSGA034929 | XP_006662784.1 short-chain dehydrogenase TIC 32, chloroplastic-like                       |
| TCONS_00007096 | 0.0273519 | 0.986944    | 0.51662     | BGIOSGA024774 | XP_006648100.1 glutathionyl-hydroquinone reductase YqjG                                   |
| TCONS_00026958 | 0.0273596 | 0.218144    | 1.13196     | #N/A          | #N/A                                                                                      |
| TCONS_00011270 | 0.0274563 | -0.226658   | 0.679734    | BGIOSGA013874 | XP_006650846.1 zinc finger matrix-type protein 2                                          |
| TCONS_00007033 | 0.027773  | 0.240236    | -0.517447   | BGIOSGA023197 | XP_006648060.1 probable protein phosphatase 2C 27                                         |
| TCONS_00024442 | 0.0278363 | 0.202902    | -0.783568   | BGIOSGA024963 | XP_015695121.1 glutamate--glyoxylate aminotransferase 2-like                              |
| TCONS_00032707 | 0.0279275 | -0.00659875 | 0.117405    | BGIOSGA029278 | XP_006662063.1 putative dual specificity protein phosphatase DSP8                         |
| TCONS_00021748 | 0.0280651 | 0.45309     | 0.59814     | BGIOSGA019284 | XP_015694122.1 hydrophobic protein OSR8-like                                              |
| TCONS_00037488 | 0.0282754 | -0.0601125  | 0.564174    | BGIOSGA017384 | XP_006664176.1 ubiquitin-conjugating enzyme E2 variant 1C-like                            |
| TCONS_00031693 | 0.0282857 | 0.0378384   | 0.698035    | BGIOSGA037905 | XP_006662645.1 ankyrin repeat domain-containing protein 29                                |
| TCONS_00003283 | 0.0284644 | -0.0805202  | 1.97901     | BGIOSGA001929 | XP_006644034.1 PREDICTED: uncharacterized protein LOC102703908                            |
| TCONS_00009178 | 0.0284923 | -0.423062   | 0.0336034   | BGIOSGA031001 | XP_006649260.1 serine/threonine-protein kinase OSR1-like isoform X1                       |
| TCONS_00028299 | 0.0286903 | -0.142542   | -0.827984   | BGIOSGA037594 | XP_008678366.1 cyclin-dependent protein kinase inhibitor SMR1                             |
| TCONS_00018455 | 0.0287875 | 0.0993472   | 0.579089    | BGIOSGA011842 | XP_003569146.1 translocon-associated protein subunit beta                                 |
| TCONS_00025233 | 0.0288153 | 1.53107     | 1.52177     | BGIOSGA001410 | XP_006657780.1 isocitrate lyase                                                           |
| TCONS_00016948 | 0.0288685 | 0.13483     | -0.252832   | BGIOSGA002562 | XP_006653935.1 charged multivesicular body protein 5-like                                 |
| TCONS_00024061 | 0.0289528 | -0.928847   | -2.88038    | BGIOSGA006672 | XP_006657934.1 MADS-box transcription factor 18                                           |
| TCONS_00008561 | 0.0291769 | -0.85185    | -1.67552    | BGIOSGA016645 | XP_015688118.1 pentatricopeptide repeat-containing protein At1g06140, mitochondrial-like  |
| TCONS_00032490 | 0.029193  | 0.133361    | 0.240232    | BGIOSGA004568 | XP_015697397.1 katanin p80 WD40 repeat-containing subunit B1 homolog isoform X1           |
| TCONS_00002968 | 0.0292014 | -0.696445   | 0.220385    | #N/A          | #N/A                                                                                      |
| TCONS_00007264 | 0.0294711 | 0.96487     | -0.243556   | BGIOSGA007218 | XP_002453222.1 uncharacterized protein LOC8055043                                         |
| TCONS_00025655 | 0.029573  | -0.381139   | 0.382197    | BGIOSGA018258 | XP_004958592.1 protein EARLY RESPONSIVE TO DEHYDRATION 15                                 |
| TCONS_00036755 | 0.0296727 | 0.183732    | -0.72968    | BGIOSGA036560 | XP_006663853.1 RNA polymerase II subunit A C-terminal domain phosphatase SSU72            |
| TCONS_00031696 | 0.0296791 | 0.231822    | -2.83453    | BGIOSGA018401 | XP_006657377.1 probable pyridoxal 5'-phosphate synthase subunit PDX1.1                    |
| TCONS_00016907 | 0.0297604 | 0.217026    | 0.399301    | BGIOSGA014057 | XP_006653902.1 exocyst complex component EXO70A1-like                                     |
| TCONS_00027035 | 0.0298309 | 0.212509    | 0.738676    | BGIOSGA016670 | XP_006659646.1 probable E3 ubiquitin-protein ligase ARI8                                  |
| TCONS_00002790 | 0.0298514 | 0.0836516   | 0.366516    | BGIOSGA007576 | XP_006643734.1 protein SUPPRESSOR OF K(+) TRANSPORT GROWTH DEFECT 1                       |
| TCONS_00016813 | 0.029853  | -0.681471   | 0.456951    | BGIOSGA014152 | XP_006652974.1 cell division protein FtsZ homolog 1, chloroplastic                        |
| TCONS_00017293 | 0.0299605 | -2.13856    | -3.31537    | BGIOSGA034240 | XP_003566442.2lachrymatory-factor synthase                                                |

## transcriptome

|                |           |             |            |               |                                                                                                                      |
|----------------|-----------|-------------|------------|---------------|----------------------------------------------------------------------------------------------------------------------|
| TCONS_00011571 | 0.0302116 | 1.42441     | 0.842318   | BGIOSGA026279 | XP_003558805.1 uncharacterized protein<br>LOC100825549                                                               |
| TCONS_00009349 | 0.0302235 | -0.428685   | 0.215368   | BGIOSGA031852 | XP_006649429.1 protein RRP6-like 2 isoform X1<br>XP_006664281.1 probable WRKY transcription<br>factor 54             |
| TCONS_00034174 | 0.0302338 | 0.44606     | -0.316054  | BGIOSGA000583 | XP_004972796.1 protein NTM1-like 9                                                                                   |
| TCONS_00027382 | 0.0302447 | 2.03417     | 0.199196   | BGIOSGA022861 | XP_006647486.1 PREDICTED: uncharacterized<br>protein LOC102701695                                                    |
| TCONS_00006414 | 0.0307888 | 0.186826    | 0.333235   | BGIOSGA008578 | XP_018506047.1 PREDICTED: uncharacterized<br>protein LOC103959960                                                    |
| TCONS_00022059 | 0.0309097 | -0.70718    | -0.373974  | BGIOSGA035797 | XP_003566470.1 protein pleiotropic regulatory<br>locus 1                                                             |
| TCONS_00010034 | 0.030958  | 0.588295    | 1.12899    | BGIOSGA012587 | XP_006661876.1 pre-mRNA-processing protein<br>40C isoform X2                                                         |
| TCONS_00032454 | 0.0310408 | -0.0798121  | 0.168531   | BGIOSGA031663 | XP_004984943.1 putative<br>metallophosphoesterase At3g03305                                                          |
| TCONS_00011942 | 0.031048  | -0.825023   | 0.250193   | BGIOSGA011071 | XP_004953885.1 protease Do-like 9                                                                                    |
| TCONS_00008794 | 0.0311326 | 0.451529    | 0.640133   | BGIOSGA005640 | XP_006659222.1 ethanolamine-phosphate<br>cytidyltransferase-like                                                     |
| TCONS_00026141 | 0.0311693 | 0.0887296   | -0.47947   | BGIOSGA034595 | XP_022681616.1 uncharacterized protein<br>LOC101753518                                                               |
| TCONS_00021556 | 0.0311856 | -1.56767    | -0.0353857 | BGIOSGA017194 | XP_006649468.1 PREDICTED: uncharacterized<br>protein LOC102700034                                                    |
| TCONS_00011638 | 0.0313298 | -0.230918   | 0.229802   | BGIOSGA032908 | XP_015695776.1 myb-related protein Zm38-like                                                                         |
| TCONS_00028437 | 0.0313643 | 0.819026    | 1.70348    | BGIOSGA002691 | XP_006649238.1 sporulation-specific protein 15-<br>like                                                              |
| TCONS_00009145 | 0.0316126 | -1.02782    | -0.59602   | BGIOSGA031467 | XP_006659116.1 protein ENHANCED DISEASE<br>RESISTANCE 2-like                                                         |
| TCONS_00027350 | 0.0316128 | -0.563097   | -0.643177  | BGIOSGA027648 | XP_006663183.1 glutamate-rich WD repeat-<br>containing protein 1-like                                                |
| TCONS_00034240 | 0.0317169 | 0.895083    | 0.561157   | BGIOSGA036678 | XP_010237951.1 uncharacterized protein<br>LOC100826374                                                               |
| TCONS_00034159 | 0.031766  | 0.564758    | 0.45075    | BGIOSGA012580 | NP_001131978.1 Purine permease 3                                                                                     |
| TCONS_00030193 | 0.0320068 | -0.40418    | -0.735535  | BGIOSGA029614 | XP_015692424.1 probable LRR receptor-like<br>serine/threonine-protein kinase MRH1                                    |
| TCONS_00019785 | 0.0321833 | -0.00964993 | -0.291696  | BGIOSGA018227 | XP_006660036.1 indole-3-glycerol phosphate<br>synthase, chloroplastic-like                                           |
| TCONS_00026373 | 0.0322442 | -0.333285   | -1.08748   | BGIOSGA014924 | XP_006653389.2 protein FAM188A                                                                                       |
| TCONS_00015875 | 0.0322657 | -0.212843   | -0.212251  | BGIOSGA015114 | XP_015693219.1 nuclear pore complex protein<br>NUP50B-like                                                           |
| TCONS_00019123 | 0.032293  | 0.645383    | 1.34493    | BGIOSGA008589 | XP_006647946.2 methionine aminopeptidase<br>1D, chloroplastic/mitochondrial                                          |
| TCONS_00008845 | 0.0323925 | -0.995391   | -0.513929  | BGIOSGA014372 | XP_015699157.1 serine/threonine-protein kinase<br>Nek5                                                               |
| TCONS_00004775 | 0.0325772 | -2.77268    | -0.527402  | BGIOSGA025243 | XP_006653038.1 choline transporter-like protein<br>2                                                                 |
| TCONS_00016887 | 0.0325816 | -1.22547    | -0.445456  | BGIOSGA014074 | XP_006660095.2 phosphoglucon phosphatase<br>LSF1, chloroplastic                                                      |
| TCONS_00026514 | 0.0326155 | 0.0223037   | 0.677693   | BGIOSGA034915 | XP_004967687.1 uncharacterized protein<br>LOC101776220                                                               |
| TCONS_00000666 | 0.0327543 | -0.23193    | 0.466144   | BGIOSGA003253 | #N/A                                                                                                                 |
| TCONS_00026239 | 0.0328027 | 0.0489644   | 0.31997    | #N/A          | #N/A                                                                                                                 |
| TCONS_00013075 | 0.0328533 | 0.262603    | 0.208885   | BGIOSGA009906 | XP_006650506.1 phytochrome A                                                                                         |
| TCONS_00010850 | 0.0329161 | -0.432651   | 0.069909   | BGIOSGA033761 | XP_006665115.1 probable F-box protein<br>At4g22165                                                                   |
| TCONS_00023752 | 0.03297   | 0.612294    | 0.960213   | BGIOSGA027780 | XP_006657752.2 ATP-dependent helicase rhp16<br>XP_015689679.1 receptor-like serine/threonine-<br>protein kinase NCRK |
| TCONS_00007224 | 0.0331642 | -3.32404    | -2.03934   | BGIOSGA005308 | XP_006656058.2 PREDICTED: uncharacterized<br>protein LOC102711627                                                    |
| TCONS_00022196 | 0.0332291 | 0.188758    | 0.484238   | BGIOSGA021300 | XP_022684934.1 protein FAM135B                                                                                       |
| TCONS_00033041 | 0.0332389 | 1.02442     | 0.613434   | BGIOSGA036569 | XP_004965737.1 homeobox protein knotted-1-like<br>11 isoform X1                                                      |
| TCONS_00022655 | 0.0332947 | -0.533277   | -0.127986  | BGIOSGA007674 | XP_006657273.1 EH domain-containing protein 1-<br>like                                                               |
| TCONS_00021275 | 0.0335866 | -0.405316   | -0.191764  | BGIOSGA017326 | XP_015690189.1 probable apyrase 1                                                                                    |
| TCONS_00012193 | 0.0337227 | -0.750635   | -0.410259  | BGIOSGA009975 | XP_006653397.2 ubiquitin carboxyl-terminal<br>hydrolase 27                                                           |
| TCONS_00014269 | 0.0338052 | -0.83309    | 0.528216   | BGIOSGA016425 | XP_006660302.1 type I inositol polyphosphate 5-<br>phosphatase 13-like                                               |
| TCONS_00026971 | 0.0339258 | 0.317065    | 0.136039   | BGIOSGA006480 | XP_006656146.1 PREDICTED: uncharacterized<br>protein LOC102715027                                                    |
| TCONS_00022381 | 0.0339593 | 0.349559    | -0.538803  | BGIOSGA009791 | XP_006662570.1 PREDICTED: uncharacterized<br>protein LOC102709683                                                    |
| TCONS_00031587 | 0.0339598 | -0.00717992 | 0.466512   | BGIOSGA013510 | XP_006662375.1 cationic amino acid transporter<br>3, mitochondrial-like                                              |
| TCONS_00032277 | 0.0340666 | 0.348364    | -0.690812  | BGIOSGA010128 | XP_006656144.1 PREDICTED: uncharacterized<br>protein LOC102714019                                                    |
| TCONS_00022368 | 0.0340876 | 0.721745    | 0.573874   | BGIOSGA001614 | XP_006644440.1 GDSL esterase/lipase                                                                                  |
| TCONS_00001476 | 0.0341506 | -0.558892   | -0.418952  | BGIOSGA001241 | At1g28600-like isoform X2                                                                                            |
| TCONS_00000705 | 0.0342277 | 0.519013    | 0.673965   | BGIOSGA029758 | XP_006644083.1 putative L-cysteine<br>desulphydrase 2                                                                |
| TCONS_00005224 | 0.0342712 | -1.03956    | -0.0188321 | BGIOSGA018608 | XP_022678510.1 uncharacterized protein<br>LOC101765570                                                               |
| TCONS_00016459 | 0.0342998 | -1.91274    | -1.4025    | BGIOSGA014512 | XP_006652679.1 protein FATTY ACID EXPORT<br>4, chloroplastic                                                         |
| TCONS_00034406 | 0.0343908 | -2.00292    | -0.933981  | #N/A          | #N/A                                                                                                                 |
| TCONS_00000663 | 0.0344245 | -1.31413    | -1.21105   | BGIOSGA011224 | XP_021313762.1E3 ubiquitin-protein ligase<br>RING1-like                                                              |
| TCONS_00016533 | 0.0344285 | -0.087147   | 1.09259    | BGIOSGA014435 | XP_006652735.1 protein AE7 isoform X2                                                                                |
| TCONS_00002805 | 0.0346087 | -1.09556    | -0.0279549 | BGIOSGA013326 | XP_006643749.1 PREDICTED: uncharacterized<br>protein LOC102714322                                                    |
| TCONS_00000024 | 0.0347533 | 0.410479    | -0.396344  | BGIOSGA012543 | XP_004967932.1 ricin B-like lectin R40G3                                                                             |

## transcriptome

|                |           |           |             |               |                                                                                  |
|----------------|-----------|-----------|-------------|---------------|----------------------------------------------------------------------------------|
| TCONS_00014192 | 0.0349403 | -0.871905 | -0.810875   | BGIOSGA016347 | XP_015691684.1PREDICTED: uncharacterized protein LOC102699394 isoform X3         |
| TCONS_00023303 | 0.0351002 | 0.312811  | -0.104353   | BGIOSGA012163 | XP_006658376.1 coatomer subunit gamma-2                                          |
| TCONS_00009404 | 0.0352636 | 1.32737   | 1.44374     | BGIOSGA011957 | XP_006649480.1 nuclear pore complex protein NUP96                                |
| TCONS_00037941 | 0.0352994 | -0.234659 | 0.162645    | BGIOSGA003329 | XP_015697609.1 disease resistance protein RPP13-like                             |
| TCONS_00037365 | 0.0353912 | -1.40845  | 0.0403101   | BGIOSGA029560 | XP_004979741.1UDP-glycosyltransferase 91B1                                       |
| TCONS_00033420 | 0.0354616 | -0.311822 | -0.248049   | BGIOSGA011098 | XP_006648080.1 long chain base biosynthesis protein 1c                           |
| TCONS_00029732 | 0.0355141 | 0.0299487 | 0.0833005   | BGIOSGA008523 | XP_006660487.1 AP2-associated protein kinase 1-like                              |
| TCONS_00036372 | 0.0355832 | -1.04741  | -0.0871231  | BGIOSGA037738 | XP_017631547.1 pyridoxal kinase                                                  |
| TCONS_00020414 | 0.0356849 | 0.0565319 | -0.0675028  | BGIOSGA022599 | XP_003562759.2S phase cyclin A-associated protein in the endoplasmic reticulum   |
| TCONS_00012497 | 0.0357267 | -1.15895  | 0.00383687  | BGIOSGA011798 | XP_002467646.1probable amino-acid acetyltransferase NAGS2, chloroplastic         |
| TCONS_00028505 | 0.0359636 | -2.20694  | -2.05977    | BGIOSGA009410 | XP_015698603.1PREDICTED: uncharacterized protein LOC102700483                    |
| TCONS_00003336 | 0.0361371 | -2.82934  | -0.882709   | BGIOSGA013254 | NP_001167651.1tubulin beta-6 chain                                               |
| TCONS_00037177 | 0.0363019 | -0.28582  | 0.294674    | BGIOSGA016920 | XP_006664017.2 protein S-acyltransferase 10                                      |
| TCONS_00028508 | 0.0363824 | -0.746355 | -0.00825219 | BGIOSGA027634 | XP_006660408.1 triacylglycerol lipase 1 isoform X1                               |
| TCONS_00002135 | 0.0364297 | -0.952235 | -3.80477    | BGIOSGA012351 | XP_006646464.2PREDICTED: uncharacterized protein LOC102710086                    |
| TCONS_00017548 | 0.0365247 | 0.451415  | 0.653162    | BGIOSGA009387 | XP_004962449.1rhodanese-like domain-containing protein 7                         |
| TCONS_00014530 | 0.0365662 | 0.870177  | 1.25313     | BGIOSGA016695 | XP_006652474.1PREDICTED: uncharacterized protein LOC102717792                    |
| TCONS_00012982 | 0.0367613 | -0.297873 | 0.016834    | BGIOSGA037662 | NP_001333999.1uncharacterized LOC103643836                                       |
| TCONS_00001902 | 0.036852  | 0.495764  | 0.433917    | BGIOSGA017746 | XP_006644784.1 signal recognition particle 54 kDa protein 2                      |
| TCONS_00012079 | 0.0368807 | 0.164734  | 0.414223    | BGIOSGA003631 | XP_022678806.1ubiquitin-activating enzyme E1 3 isoform X1                        |
| TCONS_00016304 | 0.036925  | -1.20064  | -0.858467   | BGIOSGA005611 | XP_006653619.1 probable beta-D-xylosidase 6                                      |
| TCONS_00008812 | 0.0369337 | 0.670378  | 0.385665    | BGIOSGA005617 | XP_006647894.1 exocyst complex component SEC6 isoform X1                         |
| TCONS_00024553 | 0.0369703 | -0.59579  | -0.149189   | BGIOSGA021456 | XP_022684001.1disease resistance protein RPM1                                    |
| TCONS_00022591 | 0.0370018 | 0.108599  | -0.114354   | BGIOSGA020852 | XP_010227485.1stromal processing peptidase, chloroplastic isoform X1             |
| TCONS_00033468 | 0.0373318 | 0.221375  | -1.1638     | BGIOSGA000760 | XP_021316333.1cytochrome P450 94B3-like                                          |
| TCONS_00014798 | 0.0373419 | -0.24649  | 0.300811    | BGIOSGA029521 | XP_004976563.1ubiquitin fusion degradation protein 1 homolog                     |
| TCONS_00013908 | 0.0377799 | -0.150313 | -1.57892    | BGIOSGA034929 | XP_006652156.1 short-chain dehydrogenase TIC 32, chloroplastic-like              |
| TCONS_00020112 | 0.037924  | 1.38213   | 0.367276    | BGIOSGA022297 | XP_006656631.1 single-stranded DNA-binding protein WHY1, chloroplastic-like      |
| TCONS_00025813 | 0.0380277 | -2.036    | -2.59705    | BGIOSGA018174 | XP_012702109.1beta-carotene isomerase D27, chloroplastic                         |
| TCONS_00028735 | 0.0381066 | 0.334701  | -0.139169   | BGIOSGA031849 | XP_003576406.1uncharacterized protein LOC100829630                               |
| TCONS_00004752 | 0.0382465 | 0.812225  | 0.394413    | BGIOSGA016807 | XP_015699191.1 RNA polymerase II C-terminal domain phosphatase-like 2 isoform X1 |
| TCONS_00030811 | 0.0386824 | 0.256521  | -0.159533   | BGIOSGA017773 | XP_006662230.1 alanine-tRNA ligase                                               |
| TCONS_00010557 | 0.0387222 | 0.413885  | 0.328741    | BGIOSGA037730 | XP_003562255.1flowering locus K homology domain                                  |
| TCONS_00031621 | 0.0387472 | -2.90094  | -0.14935    | BGIOSGA005905 | XP_006662058.1 VAN3-binding protein-like                                         |
| TCONS_00027029 | 0.0387485 | -0.913846 | -0.324836   | BGIOSGA031077 | XP_004974050.1E3 ubiquitin-protein ligase RF12 isoform X1                        |
| TCONS_00015999 | 0.0387762 | -0.220568 | 0.542631    | BGIOSGA004525 | XP_002447950.1lipoyl synthase, mitochondrial                                     |
| TCONS_00013037 | 0.0388302 | 0.513228  | -0.249953   | BGIOSGA031968 | XP_015690036.1 myosin-binding protein 2-like                                     |
| TCONS_00029497 | 0.0388591 | -1.14018  | -0.65531    | BGIOSGA031252 | XP_006660969.1 trihelix transcription factor ASIL1-like                          |
| TCONS_00026965 | 0.0390086 | 0.804212  | 0.613444    | BGIOSGA029016 | XP_015696115.1 ranBP2-type zinc finger protein At1g67325                         |
| TCONS_00022791 | 0.0390827 | -1.12289  | 0.0563204   | BGIOSGA007584 | XP_015694268.1 zinc finger CCH domain-containing protein 13-like isoform X3      |
| TCONS_00022891 | 0.039255  | -5.21707  | -2.90995    | BGIOSGA032421 | XP_006657332.1 benzyl alcohol O-benzoyltransferase-like                          |
| TCONS_00024950 | 0.0393557 | 0.176868  | 0.0651818   | BGIOSGA004003 | XP_010228166.1DEAD-box ATP-dependent RNA helicase 5                              |
| TCONS_00031437 | 0.0394558 | -0.363046 | 0.367124    | BGIOSGA033252 | XP_006661938.1PREDICTED: uncharacterized protein LOC102720912                    |
| TCONS_00000015 | 0.0396569 | 1.29669   | -0.100987   | BGIOSGA036411 | XP_006643632.1PREDICTED: uncharacterized protein LOC102702786                    |
| TCONS_00006899 | 0.0396912 | 0.363762  | -1.12686    | BGIOSGA017184 | XP_021315253.1outer envelope protein 64, mitochondrial                           |
| TCONS_00008804 | 0.0397257 | -0.156927 | 0.206475    | BGIOSGA017225 | XP_015689462.1 cullin-3A-like                                                    |
| TCONS_00024619 | 0.0398274 | -0.440139 | 0.699321    | BGIOSGA024767 | XP_015695177.1 histone deacetylase 15-like                                       |
| TCONS_00016372 | 0.0399661 | -0.10616  | -0.353432   | BGIOSGA005906 | XP_006652610.1PREDICTED: uncharacterized protein LOC102712248                    |
| TCONS_00011808 | 0.0399801 | -0.290897 | 0.00757767  | BGIOSGA010817 | NP_001339006.1Outer arm dynein light chain 1 protein                             |
| TCONS_00007748 | 0.0401581 | 0.553747  | 0.2834      | BGIOSGA020743 | XP_015688882.1 basic leucine zipper 9-like isoform X1                            |
| TCONS_00018523 | 0.0402995 | -0.286837 | -0.00381416 | BGIOSGA010963 | XP_002440502.150S ribosomal protein L10, chloroplastic                           |
| TCONS_00013142 | 0.0403956 | -0.814941 | -0.766659   | BGIOSGA009843 | XP_004981843.1inositol 3-kinase isoform X1                                       |
| TCONS_00013356 | 0.0404321 | 0.896179  | 0.656208    | BGIOSGA024679 | XP_006650742.1PREDICTED: uncharacterized protein LOC102715282                    |
| TCONS_00016963 | 0.0405022 | -2.0039   | -2.7578     | BGIOSGA019014 | XP_015692939.1 protein EMBRYO SAC DEVELOPMENT ARREST 3, chloroplastic isoform X2 |

## transcriptome

|                |           |            |            |               |                                                                                          |
|----------------|-----------|------------|------------|---------------|------------------------------------------------------------------------------------------|
| TCONS_00007534 | 0.0405112 | 0.139357   | 0.276299   | BGIOSGA021732 | XP_003571262.13-oxoacyl-[acyl-carrier-protein] synthase, mitochondrial                   |
| TCONS_00005557 | 0.0405907 | -0.619267  | 0.330152   | BGIOSGA008557 | XP_006646975.1 probable protein phosphatase 2C 11                                        |
| TCONS_00018429 | 0.0406569 | 0.693185   | -0.187449  | BGIOSGA019816 | XP_006654880.1 calcium permeable stress-gated cation channel 1-like                      |
| TCONS_00036284 | 0.0407057 | 0.0601103  | -0.486707  | BGIOSGA037645 | XP_015698444.1 PREDICTED: uncharacterized protein LOC102703916                           |
| TCONS_00032049 | 0.0407095 | 0.460481   | 0.290828   | BGIOSGA032089 | XP_006654523.1 probable apyrase 7                                                        |
| TCONS_00011477 | 0.0407407 | 0.816795   | -1.80872   | BGIOSGA011548 | XP_021306961.1 beta-carotene 3-hydroxylase, chloroplastic                                |
| TCONS_00000034 | 0.0408254 | 0.22008    | 0.661435   | BGIOSGA002603 | XP_015699194.1 serine/threonine-protein kinase ATM isoform X2                            |
| TCONS_00008719 | 0.0409057 | 0.415385   | 0.192966   | BGIOSGA022746 | XP_006647816.2 enhancer of mRNA-decapping protein 4-like                                 |
| TCONS_00028186 | 0.0410455 | -0.495101  | -0.0170407 | BGIOSGA029619 | XP_015696223.1 glucose-6-phosphate isomerase 1, chloroplastic-like                       |
| TCONS_00010583 | 0.0411685 | -1.0415    | -0.402002  | BGIOSGA013198 | XP_004982347.1 DNA repair protein recA homolog 1, chloroplastic                          |
| TCONS_00011549 | 0.0413219 | -1.18359   | -0.121632  | BGIOSGA011470 | XP_015690770.1 PREDICTED: uncharacterized protein LOC102707106                           |
| TCONS_00009263 | 0.041389  | -0.116776  | 0.138975   | BGIOSGA017907 | XP_006663594.1 phosphatidate phosphatase PAH2-like                                       |
| TCONS_00036824 | 0.0414361 | -1.21383   | -0.395417  | BGIOSGA036487 | XP_024315750.1 uncharacterized protein LOC100832377 isoform X1                           |
| TCONS_00022610 | 0.0415211 | 0.523028   | -0.488738  | BGIOSGA000230 | XP_015693900.1 NEP1-interacting protein-like 2                                           |
| TCONS_00036392 | 0.041525  | 0.53765    | 0.194969   | BGIOSGA032938 | XP_006664177.1 homocysteine S-methyltransferase 3                                        |
| TCONS_00035050 | 0.0416927 | -0.390854  | -0.587264  | BGIOSGA033804 | XP_006662979.1 myb-related protein 306-like                                              |
| TCONS_00014749 | 0.0417556 | -0.301805  | 0.15002    | BGIOSGA018660 | XP_006652646.2 transport and Golgi organization 2 homolog                                |
| TCONS_00016867 | 0.0419192 | -0.0169797 | -0.58389   | BGIOSGA014097 | XP_006653024.2 plastid division protein CDP1, chloroplastic                              |
| TCONS_00005548 | 0.0420126 | -0.465622  | -0.415238  | BGIOSGA019760 | XP_021313837.1 zinc finger protein CONSTANS-LIKE 3                                       |
| TCONS_00004087 | 0.042161  | -0.996744  | 0.387041   | BGIOSGA001101 | XP_006644452.2 membrane-bound transcription factor site-2 protease homolog               |
| TCONS_00013480 | 0.0421656 | 0.731578   | 1.42465    | BGIOSGA009510 | XP_006651985.1 pumilio homolog 24                                                        |
| TCONS_00035137 | 0.0422688 | -0.484338  | -0.0143417 | BGIOSGA021456 | XP_006663025.1 PREDICTED: uncharacterized protein LOC102718497                           |
| TCONS_00026547 | 0.0425976 | -0.0212213 | -0.627844  | BGIOSGA037142 | XP_006659379.1 AP-4 complex subunit sigma                                                |
| TCONS_00025988 | 0.042619  | -1.52465   | -1.12042   | BGIOSGA028063 | XP_015696097.1 translation initiation factor IF-2 isoform X1                             |
| TCONS_00036594 | 0.0428104 | 0.176754   | 0.273593   | BGIOSGA006117 | XP_006664298.1 bifunctional aspartokinase/homoserine dehydrogenase 1 isoform X3          |
| TCONS_00031542 | 0.0428657 | 0.232243   | -1.73669   | BGIOSGA038222 | XP_006662551.1 protein CURVATURE THYLAKOID 1B, chloroplastic-like                        |
| TCONS_00004930 | 0.0429002 | 0.414565   | 0.433856   | BGIOSGA016437 | XP_015688276.1 magnesium transporter MRS2-F                                              |
| TCONS_00034230 | 0.0429354 | 0.153513   | 0.507748   | BGIOSGA036939 | XP_006663786.1 aladin-like                                                               |
| TCONS_00001119 | 0.0431807 | 0.0205801  | -1.3011    | BGIOSGA003741 | XP_004968940.1 uncharacterized protein LOC101776372                                      |
| TCONS_00009384 | 0.0432465 | 0.572823   | 0.489961   | BGIOSGA031938 | XP_006651071.1 carbon catabolite repressor protein 4 homolog 1-like                      |
| TCONS_00006591 | 0.0432958 | 0.462362   | 1.45695    | BGIOSGA037784 | XP_006647638.1 probable lipid phosphate phosphatase beta                                 |
| TCONS_00021376 | 0.0434626 | -0.0563589 | -0.111208  | BGIOSGA023604 | XP_006656490.1 PREDICTED: uncharacterized protein LOC102720530                           |
| TCONS_00035458 | 0.0435527 | -2.47953   | -1.33028   | BGIOSGA006347 | XP_015698002.1 serine/threonine-protein kinase At5g01020-like                            |
| TCONS_00037046 | 0.0437563 | 0.614288   | 0.465346   | BGIOSGA006680 | XP_006663971.1 40S ribosomal protein S3a-like                                            |
| TCONS_00011704 | 0.0438904 | -0.0327678 | 1.11481    | BGIOSGA011306 | XP_006649533.1 2-carboxy-1,4-naphthoquinone phytyltransferase, chloroplastic isoform X1  |
| TCONS_00014934 | 0.0440021 | 0.0379959  | 0.0147431  | BGIOSGA007260 | XP_006652817.1 gamma-aminobutyrate transaminase 1, mitochondrial                         |
| TCONS_00018339 | 0.0441086 | -0.548875  | 0.0405441  | BGIOSGA001086 | XP_006654808.1 putative glucose-6-phosphate 1-epimerase isoform X1                       |
| TCONS_00021723 | 0.0441303 | -0.81406   | -0.749264  | BGIOSGA023197 | XP_015693757.1 probable protein phosphatase 2C 54                                        |
| TCONS_00012812 | 0.0441793 | 0.614398   | 1.12134    | BGIOSGA010149 | XP_006650339.1 ornithine aminotransferase, mitochondrial                                 |
| TCONS_00008707 | 0.044318  | -0.275883  | -2.45251   | BGIOSGA005725 | XP_006648997.2 basic blue protein-like                                                   |
| TCONS_00025556 | 0.0443222 | -0.119126  | 0.329042   | BGIOSGA023877 | XP_003562650.1 putative MYST-like histone acetyltransferase 1                            |
| TCONS_00000955 | 0.0443789 | 0.841146   | 0.0510794  | BGIOSGA024227 | XP_004968778.1 1NPL4-like protein                                                        |
| TCONS_00006392 | 0.0444021 | 0.584769   | 0.242449   | BGIOSGA026762 | XP_006647462.1 26S proteasome non-ATPase regulatory subunit 6-like                       |
| TCONS_00032543 | 0.044535  | -1.17946   | -0.88319   | BGIOSGA018965 | XP_011004377.1 actin-7-like isoform X2                                                   |
| TCONS_00020100 | 0.0445711 | -0.948008  | -0.719598  | BGIOSGA022281 | XP_006655781.2 DNA-repair protein XRCC1                                                  |
| TCONS_00011481 | 0.0445937 | 0.264957   | -1.30462   | BGIOSGA011544 | XP_015689699.1 PREDICTED: uncharacterized protein LOC102721435                           |
| TCONS_00031685 | 0.0446011 | 0.934882   | 0.25336    | BGIOSGA008862 | XP_006662105.1 TOM1-like protein 2                                                       |
| TCONS_00007560 | 0.0447213 | 0.444998   | 0.725721   | BGIOSGA006923 | XP_006647045.1 DEAD-box ATP-dependent RNA helicase 41                                    |
| TCONS_00017747 | 0.0447238 | 0.436503   | 1.18271    | BGIOSGA019809 | XP_006655285.1 cyclin-dependent kinase D-1                                               |
| TCONS_00013348 | 0.0448648 | -0.402103  | -1.45389   | BGIOSGA022384 | XP_002463733.1 PRA1 family protein E                                                     |
| TCONS_00012596 | 0.0448872 | -0.382053  | -1.06361   | BGIOSGA023467 | XP_006650268.1 probable beta-1,3-galactosyltransferase 2                                 |
| TCONS_00003979 | 0.0449262 | -0.534758  | 0.150919   | BGIOSGA001213 | XP_006646097.1 ubiquitin-like modifier-activating enzyme atg7                            |
| TCONS_00031663 | 0.0449401 | -0.421514  | 0.375041   | BGIOSGA013044 | XP_006662087.1 NADH dehydrogenase [ubiquinone] 1 alpha subcomplex assembly factor 3-like |

## transcriptome

|                |           |            |             |               |                                                                                            |
|----------------|-----------|------------|-------------|---------------|--------------------------------------------------------------------------------------------|
| TCONS_00031402 | 0.0450764 | 0.444544   | 0.116329    | BGIOSGA033214 | XP_006662479.2 mediator of RNA polymerase II transcription subunit 16                      |
| TCONS_00013288 | 0.0451797 | 1.46       | -1.45468    | BGIOSGA031515 | XP_006650693.1 probable glutathione S-transferase GSTU1                                    |
| TCONS_00028214 | 0.0452123 | 0.292101   | 1.79498     | BGIOSGA026168 | XP_006659519.1 serine/arginine-rich splicing factor SC35                                   |
| TCONS_00031535 | 0.0452446 | 0.319371   | -0.11866    | BGIOSGA021783 | XP_006661997.1 desumoylating isopeptidase 2-like                                           |
| TCONS_00010524 | 0.0453946 | 0.988022   | 0.723669    | BGIOSGA020338 | XP_015691206.1 T-complex protein 1 subunit beta                                            |
| TCONS_00022916 | 0.0454187 | 2.01742    | -0.0603926  | BGIOSGA028131 | XP_004966470.1 protein EARLY-RESPONSIVE TO DEHYDRATION 7, chloroplastic                    |
| TCONS_00014018 | 0.0454198 | 1.39913    | 0.452696    | BGIOSGA016164 | XP_006652188.1 cell division cycle 5-like protein                                          |
| TCONS_00022797 | 0.0454701 | -0.208934  | -0.309442   | BGIOSGA005753 | XP_015694284.1 external alternative NAD(P)H-ubiquinone oxidoreductase B1, mitochondrial    |
| TCONS_00029598 | 0.0455589 | -2.10109   | 0.19878     | BGIOSGA004689 | XP_006661031.1 PI-PLC X domain-containing protein At5g67130                                |
| TCONS_00032782 | 0.0455761 | -0.180253  | -0.32372    | BGIOSGA007638 | XP_006662107.1 choline-phosphate cytidylyltransferase 2-like                               |
| TCONS_00004604 | 0.0456959 | -1.822     | 0.418507    | BGIOSGA000613 | XP_009386029.1 14 kDa zinc-binding protein                                                 |
| TCONS_00018226 | 0.0458544 | -1.32159   | -1.20083    | BGIOSGA008016 | XP_006654722.1 protein IQ-DOMAIN 1-like                                                    |
| TCONS_00011229 | 0.0459471 | 0.368849   | 0.629352    | BGIOSGA009190 | XP_015690129.1 NEDD8-activating enzyme E1 regulatory subunit-like                          |
| TCONS_00003934 | 0.0465063 | 2.27594    | 0.789927    | BGIOSGA001585 | XP_006644394.2 cytochrome P450 72A15-like                                                  |
| TCONS_00019999 | 0.0465131 | -1.61542   | -0.492125   | BGIOSGA023825 | XP_006656567.1 protein SMG9-like                                                           |
| TCONS_00016633 | 0.0465164 | 0.00436688 | -0.397528   | BGIOSGA014343 | XP_006652838.1 F-box/VWD-40 repeat-containing protein At5g21040                            |
| TCONS_00022417 | 0.0465884 | -0.956126  | -0.946911   | BGIOSGA022118 | XP_006656159.2 ABC transporter G family member 42-like                                     |
| TCONS_00025072 | 0.0465909 | -0.314765  | -2.44409    | BGIOSGA034755 | XP_004957041.1 ttuliposide A-converting enzyme 1, chloroplastic                            |
| TCONS_00036544 | 0.0467436 | 0.30367    | 0.576791    | BGIOSGA036776 | XP_006664861.1 PREDICTED: uncharacterized protein LOC102700676                             |
| TCONS_00017087 | 0.0471546 | -0.366546  | -0.310065   | BGIOSGA009787 | XP_006654810.1 pto-interacting protein 1-like                                              |
| TCONS_00003138 | 0.0471724 | -0.376232  | -0.34171    | BGIOSGA002083 | XP_006643936.1 protein Mpv17                                                               |
| TCONS_00013539 | 0.0471845 | 0.222993   | -0.0446572  | BGIOSGA009437 | XP_006650897.1 3-oxoacyl-[acyl-carrier-protein] reductase FabG isoform X2                  |
| TCONS_00025377 | 0.047236  | -0.482382  | 0.382962    | BGIOSGA004566 | XP_006657864.2 zinc-metalloproteinase, peroxisomal-like isoform X1                         |
| TCONS_00000466 | 0.0474488 | 0.135196   | -0.290429   | BGIOSGA004415 | NP_001333482.1 reticulon-like protein B1                                                   |
| TCONS_00014730 | 0.0476914 | 0.454734   | -0.847616   | BGIOSGA034146 | XP_002446921.1 probable phospholipid hydroperoxide glutathione peroxidase 6, mitochondrial |
| TCONS_00019810 | 0.0477973 | 1.17915    | 0.62624     | BGIOSGA029939 | XP_006654803.1 DNA-3-methyladenine glycosylase 1-like                                      |
| TCONS_00011763 | 0.0478113 | 0.167009   | 0.638703    | BGIOSGA011242 | XP_004985267.154S ribosomal protein L51, mitochondrial                                     |
| TCONS_00033701 | 0.0480962 | -0.158756  | -0.346553   | BGIOSGA035474 | XP_015698034.1 replication factor C subunit 1 isoform X1                                   |
| TCONS_00017058 | 0.0482218 | -0.611066  | 0.171504    | BGIOSGA019111 | XP_006654953.1 PREDICTED: uncharacterized protein LOC102701824                             |
| TCONS_00031677 | 0.0486802 | 0.26113    | -0.412644   | BGIOSGA033496 | XP_006662101.1 NADH dehydrogenase [ubiquinone] 1 beta subcomplex subunit 10-B-like         |
| TCONS_00010435 | 0.0486868 | 0.103029   | -0.0837413  | BGIOSGA021974 | XP_015690752.1 PREDICTED: LOW QUALITY PROTEIN: uncharacterized protein LOC102704410        |
| TCONS_00011246 | 0.0487458 | -0.304221  | 1.20614     | BGIOSGA027931 | XP_006650819.1 hemK methyltransferase family member 2                                      |
| TCONS_00032842 | 0.0490634 | 0.621757   | 0.105776    | BGIOSGA036733 | XP_006663737.1 PREDICTED: uncharacterized protein LOC102701873                             |
| TCONS_00034546 | 0.0492229 | -0.725493  | -0.241279   | BGIOSGA015581 | XP_002449362.1 uncharacterized protein LOC8071686                                          |
| TCONS_00029620 | 0.0493291 | -1.83823   | 0.514023    | BGIOSGA036325 | XP_021304755.1 ABC transporter G family member 11                                          |
| TCONS_00023792 | 0.0495806 | 1.03843    | 0.214363    | BGIOSGA012310 | XP_006658622.1 ABC transporter G family member 43-like                                     |
| TCONS_00017142 | 0.0497511 | -0.0603536 | -0.881118   | BGIOSGA010749 | XP_006654999.1 formin-like protein 7                                                       |
| TCONS_00020783 | 0.0500395 | -0.546144  | -0.296871   | BGIOSGA001535 | XP_024318165.1 disease resistance protein RPM1                                             |
| TCONS_00023820 | 0.0500709 | -0.582184  | 0.412568    | BGIOSGA025851 | XP_015694906.1 protein ORAOV1 homolog                                                      |
| TCONS_00019395 | 0.0501151 | -0.393341  | 0.817451    | BGIOSGA003012 | XP_006655367.2 PREDICTED: uncharacterized protein LOC102707966                             |
| TCONS_00024381 | 0.0501495 | 2.70165    | 0.925249    | BGIOSGA020734 | XP_015694964.1 protein kinase 2A, chloroplastic-like                                       |
| TCONS_00036070 | 0.050191  | -0.569737  | 0.218657    | BGIOSGA000593 | XP_006664036.2 PREDICTED: uncharacterized protein LOC102700197                             |
| TCONS_00016640 | 0.0503017 | -0.218802  | 0.586255    | BGIOSGA002990 | XP_004987374.1 transcription factor GTE7                                                   |
| TCONS_00000626 | 0.050493  | -0.28368   | -0.660565   | BGIOSGA003209 | NP_001310340.1 geranylgeranyl diphosphate reductase, chloroplastic-like                    |
| TCONS_00036837 | 0.0505973 | 1.01387    | -0.00874608 | BGIOSGA032873 | XP_006664417.1 probable protein phosphatase 2C 77                                          |
| TCONS_00018979 | 0.0506847 | -0.409452  | -0.298469   | BGIOSGA019146 | XP_004962489.1 acyl transferase 5                                                          |
| TCONS_00009068 | 0.0507043 | -0.283333  | -3.18986    | BGIOSGA009554 | XP_004954457.1 zinc finger protein ZAT5                                                    |
| TCONS_00007195 | 0.0508019 | 0.00537726 | -0.195071   | BGIOSGA029555 | XP_006660762.1 60S ribosomal protein L9                                                    |
| TCONS_00014081 | 0.0508538 | 0.512914   | -0.0542343  | BGIOSGA016234 | XP_006652201.1 RPM1-interacting protein 4-like                                             |
| TCONS_00029094 | 0.0508583 | -0.0228745 | -0.424554   | BGIOSGA030844 | XP_006660663.1 oryzain gamma chain                                                         |
| TCONS_00008289 | 0.0509389 | 0.715759   | 0.888529    | BGIOSGA006141 | NP_001149298.1 alkaline phosphatase D precursor                                            |
| TCONS_00001756 | 0.0509747 | 0.0802514  | -0.107569   | BGIOSGA029866 | XP_003578837.1 probable alpha, alpha-trehalose-phosphate synthase [UDP-forming] 7          |
| TCONS_00027187 | 0.0511521 | 1.28805    | 0.824492    | BGIOSGA027815 | XP_006659731.1 nicalin                                                                     |
| TCONS_00030040 | 0.0511782 | 0.270372   | 0.0401939   | BGIOSGA028017 | XP_004956809.160S ribosomal protein L34                                                    |

## transcriptome

|                |           |            |            |               |                                                                                     |
|----------------|-----------|------------|------------|---------------|-------------------------------------------------------------------------------------|
| TCONS_00004981 | 0.0511819 | 0.612581   | 0.0347709  | BGIOSGA026597 | XP_004971074.1CBS domain-containing protein CBSX6                                   |
| TCONS_00006458 | 0.0511997 | -3.58338   | -3.07127   | BGIOSGA007704 | XP_020407052.1uncharacterized LOC100278596 isoform X1                               |
| TCONS_00030943 | 0.0514634 | -1.1329    | -0.59585   | BGIOSGA013687 | XP_006662250.1 probable tRNA (guanine(26)-N(2))-dimethyltransferase 2               |
| TCONS_00029547 | 0.0517268 | 0.21727    | -0.0649776 | BGIOSGA031305 | XP_006661005.2PREDICTED: uncharacterized protein LOC102709675                       |
| TCONS_00018430 | 0.0517641 | -0.203562  | 0.102504   | BGIOSGA020485 | XP_006654882.1 sm-like protein LSM8                                                 |
| TCONS_00021554 | 0.0519331 | -0.0120208 | -0.0446081 | BGIOSGA021997 | XP_002437766.2RNA 2'-phosphotransferase 1                                           |
| TCONS_00028559 | 0.0519668 | -0.444681  | 0.0985351  | BGIOSGA038076 | XP_006660423.1 calmodulin-binding receptor-like cytoplasmic kinase 3                |
| TCONS_00001059 | 0.0519746 | 0.561593   | 0.413647   | BGIOSGA003674 | XP_006644245.1 protein AATF                                                         |
| TCONS_00007586 | 0.0519754 | #N/A       | -3.86159   | #N/A          | #N/A                                                                                |
| TCONS_00014275 | 0.0521873 | -0.455734  | -0.735141  | BGIOSGA006968 | XP_003579753.1probable serine/threonine-protein kinase At1g01540 isoform X1         |
| TCONS_00000996 | 0.0523494 | -1.52467   | 0.135856   | BGIOSGA003595 | XP_006644206.1 oxygen-evolving enhancer protein 1, chloroplastic                    |
| TCONS_00023598 | 0.0523501 | 0.775061   | -0.70945   | BGIOSGA005904 | XP_015695105.1 probable aquaporin PIP2-1                                            |
| TCONS_00006218 | 0.052452  | 0.311443   | 0.892806   | BGIOSGA008381 | XP_006647352.2 ribonuclease J isoform X1                                            |
| TCONS_00008119 | 0.0524769 | 0.120005   | -0.391988  | BGIOSGA006316 | XP_015688620.1PREDICTED: uncharacterized protein At5g03900, chloroplastic, partial  |
| TCONS_00011012 | 0.0525215 | -0.0322016 | 1.46489    | BGIOSGA024936 | XP_015690083.1 casein kinase II subunit alpha-like                                  |
| TCONS_00007844 | 0.0526352 | -0.937666  | -0.788533  | BGIOSGA022389 | XP_015689528.1 putative disease resistance RPP13-like protein X1                    |
| TCONS_00022277 | 0.0530591 | 0.803477   | -0.221374  | BGIOSGA023101 | XP_006656098.1 putative phospholipid-transporting ATPase 9 isoform X1               |
| TCONS_00020617 | 0.0531461 | 0.476943   | 1.23724    | #N/A          | #N/A                                                                                |
| TCONS_00035698 | 0.0532893 | -2.04984   | -0.96279   | BGIOSGA037113 | XP_006663881.1 photosystem I reaction center subunit N, chloroplastic               |
| TCONS_00016275 | 0.0533114 | 0.211685   | -0.214707  | BGIOSGA015695 | XP_006652525.1 endoplasmic reticulum metalloproteinase 1                            |
| TCONS_00010265 | 0.0534612 | 0.643332   | 0.590846   | BGIOSGA012829 | XP_006432385.1DNA-directed RNA polymerase III subunit 2 isoform X1                  |
| TCONS_00001888 | 0.0535952 | 0.330559   | 0.443169   | BGIOSGA010095 | XP_006644769.1 regulatory protein NPR3-like                                         |
| TCONS_00026821 | 0.0539742 | 0.0824483  | -0.030502  | BGIOSGA028874 | XP_015696016.1 copper-transporting ATPase PAA1, chloroplastic isoform X2            |
| TCONS_00011931 | 0.0542419 | 3.40849    | 1.23447    | BGIOSGA003170 | XP_006651229.2PREDICTED: uncharacterized protein LOC102700696                       |
| TCONS_00013882 | 0.0543132 | 0.462619   | 0.058969   | BGIOSGA016060 | XP_015692182.1PREDICTED: uncharacterized protein LOC102717977                       |
| TCONS_00037535 | 0.0544105 | 0.484873   | 0.512044   | BGIOSGA029774 | XP_015698721.1 septin and tuftelin-interacting protein 1 homolog 1                  |
| TCONS_00031522 | 0.0546806 | 0.0264149  | -1.76377   | BGIOSGA014998 | XP_006661986.1 probable glutathione S-transferase GSTU6                             |
| TCONS_00025382 | 0.0547167 | -0.474289  | -0.7036    | BGIOSGA011168 | XP_015695379.1 vacuole membrane protein KMS1-like                                   |
| TCONS_00032962 | 0.0548245 | 0.273079   | 0.267277   | BGIOSGA036986 | XP_006663204.1PREDICTED: uncharacterized protein LOC102705296                       |
| TCONS_00001371 | 0.054944  | -0.0614338 | 0.309861   | BGIOSGA008529 | XP_006646107.2 probable protein phosphatase 2C 7                                    |
| TCONS_00013235 | 0.0551868 | -0.0543046 | 0.169705   | BGIOSGA004457 | XP_015690088.1PREDICTED: uncharacterized protein LOC102702085                       |
| TCONS_00003686 | 0.0551999 | -0.672751  | 0.00264636 | BGIOSGA001515 | XP_006644235.1 putative disease resistance protein RGA3 isoform X1                  |
| TCONS_00007396 | 0.0552628 | 0.911466   | 0.448494   | BGIOSGA020678 | XP_015689243.1 BEACH domain-containing protein B                                    |
| TCONS_00029897 | 0.055301  | -0.858687  | -0.0780441 | BGIOSGA033598 | XP_024318534.1disease resistance protein RPP13-like                                 |
| TCONS_00022025 | 0.0553685 | -0.771876  | -1.00552   | BGIOSGA021491 | XP_004965187.1protein CURVATURE THYLAKOID 1A, chloroplastic                         |
| TCONS_00008133 | 0.0555454 | -0.714757  | 0.465619   | BGIOSGA025643 | XP_015689155.1 putative F-box/FBD/LRR-repeat protein At1g66290                      |
| TCONS_00010843 | 0.0555496 | 0.783011   | -0.716916  | BGIOSGA037877 | XP_006650501.1 actin-1                                                              |
| TCONS_00010547 | 0.0556831 | 1.29979    | 0.330377   | BGIOSGA013526 | XP_010232509.2protein JINGUBANG                                                     |
| TCONS_00024490 | 0.0557581 | -1.50446   | -0.320942  | BGIOSGA021093 | XP_006658233.1PREDICTED: uncharacterized protein LOC102719504                       |
| TCONS_00021221 | 0.0557979 | -0.797576  | -0.24061   | BGIOSGA023443 | XP_006657238.1 peptidyl-prolyl cis-trans isomerase CYP59                            |
| TCONS_00027173 | 0.0558123 | 0.143538   | 0.31197    | BGIOSGA029222 | XP_015696224.1PREDICTED: uncharacterized protein LOC102714213                       |
| TCONS_00016262 | 0.055857  | -0.554103  | -2.38616   | BGIOSGA022261 | XP_006652519.1 probable low-specificity L-threonine aldolase 1                      |
| TCONS_00027532 | 0.0558723 | 1.03303    | 1.041      | BGIOSGA027482 | XP_006659206.1 KH domain-containing protein At4g18375                               |
| TCONS_00024551 | 0.056183  | -0.752696  | -0.354449  | BGIOSGA024840 | XP_015694468.1 oxygen-evolving enhancer protein 2, chloroplastic-like               |
| TCONS_00015655 | 0.0562933 | 0.597372   | 0.139327   | BGIOSGA002002 | XP_006653274.1 aspartic proteinase-like protein 2                                   |
| TCONS_00006412 | 0.0564986 | -0.0357816 | 1.17978    | BGIOSGA037734 | XP_006648820.2 transcription factor bHLH128                                         |
| TCONS_00027735 | 0.056834  | -0.988129  | -0.142253  | BGIOSGA027267 | XP_015696161.1 probable adenylate kinase 5, chloroplastic isoform X1                |
| TCONS_00008772 | 0.0568808 | 0.855722   | 0.619217   | BGIOSGA005662 | XP_006647858.1 nicastrin isoform X1                                                 |
| TCONS_00030624 | 0.0569077 | 1.66481    | -0.270759  | BGIOSGA024238 | XP_012703807.1UDP-glycosyltransferase 91C1                                          |
| TCONS_00022837 | 0.0569223 | -0.78135   | -0.202589  | BGIOSGA007550 | XP_006656423.1 E3 ubiquitin-protein ligase arkadia-like                             |
| TCONS_00022045 | 0.0572089 | 0.502326   | 0.850087   | BGIOSGA015551 | XP_006663115.1 probable LRR receptor-like serine/threonine-protein kinase At3g47570 |
| TCONS_00009171 | 0.0573573 | 0.351737   | 0.345081   | BGIOSGA013744 | XP_006650969.2PREDICTED: uncharacterized protein LOC102711416                       |
| TCONS_00029459 | 0.0573808 | -1.47237   | 0.555007   | BGIOSGA031212 | XP_002445194.1putative F-box/LRR-repeat protein At5g41840 isoform X1                |
| TCONS_00005427 | 0.0574051 | 0.402689   | -1.0227    | BGIOSGA023549 | XP_006646882.1 protein CHLOROPLAST IMPORT APPARATUS 2                               |

## transcriptome

|                |           |            |             |               |                                                                                                                          |
|----------------|-----------|------------|-------------|---------------|--------------------------------------------------------------------------------------------------------------------------|
| TCONS_00037268 | 0.0574272 | -0.455665  | -0.517645   | BGIOSGA036403 | XP_015698314.1 ABC transporter G family member 50-like                                                                   |
| TCONS_00002611 | 0.0575153 | -0.237266  | 0.211762    | BGIOSGA000031 | XP_024314581.1 uncharacterized protein LOC100835523, partial                                                             |
| TCONS_00014412 | 0.0576284 | -2.3672    | -1.32773    | BGIOSGA016575 | XP_015691490.1 protein ALTERED XYLOGLUCAN 4-like                                                                         |
| TCONS_00030358 | 0.0578095 | 0.107183   | -0.499326   | BGIOSGA034853 | XP_015696550.1 transcription factor RF2a                                                                                 |
| TCONS_00010923 | 0.0581041 | -0.0756433 | 0.556204    | BGIOSGA013531 | XP_006650562.1 CWF19-like protein 2                                                                                      |
| TCONS_00024199 | 0.0581172 | -0.382263  | 0.33019     | BGIOSGA034288 | XP_006658030.1 xylulose kinase-like                                                                                      |
| TCONS_00013379 | 0.0581284 | -2.27698   | -1.00869    | BGIOSGA013773 | XP_015690117.1 protochlorophyllide-dependent translocon component 52, chloroplastic-like                                 |
| TCONS_00009117 | 0.0581949 | 0.615964   | 0.316373    | BGIOSGA020885 | XP_006650939.1 ribose-phosphate pyrophosphokinase 1-like                                                                 |
| TCONS_00025535 | 0.058371  | 0.107301   | 0.591886    | BGIOSGA004017 | XP_006657969.2 CDPK-related protein kinase-like                                                                          |
| TCONS_00025166 | 0.0584783 | 0.359679   | 0.334049    | BGIOSGA013582 | XP_006657739.1 serine/threonine-protein kinase svkA-like                                                                 |
| TCONS_00014016 | 0.0587375 | 0.619322   | 0.672499    | BGIOSGA016162 | XP_015691726.1 PREDICTED: uncharacterized protein LOC102699399 isoform X2                                                |
| TCONS_00004045 | 0.0588256 | -0.39497   | -0.282369   | BGIOSGA001147 | XP_015692399.1 protein CHROMATIN REMODELING 24-like                                                                      |
| TCONS_00002391 | 0.0592779 | 0.00756361 | 0.338045    | BGIOSGA005028 | XP_004971016.1 protein BLISTER                                                                                           |
| TCONS_00017168 | 0.0597366 | -1.26827   | -0.660671   | BGIOSGA019214 | XP_006655010.1 PREDICTED: uncharacterized protein LOC102718837 isoform X1                                                |
| TCONS_00033912 | 0.0598873 | -0.432325  | 0.00460005  | BGIOSGA035607 | XP_006663072.1 protein FRA10AC1                                                                                          |
| TCONS_00027790 | 0.0599643 | -0.915732  | -0.109191   | BGIOSGA030213 | XP_003571630.1 uncharacterized protein LOC100825830                                                                      |
| TCONS_00021741 | 0.0600577 | -1.18378   | 0.804847    | BGIOSGA021780 | XP_006655853.2 PREDICTED: uncharacterized protein LOC102722683                                                           |
| TCONS_00027004 | 0.0601503 | 1.22789    | 1.61357     | BGIOSGA029055 | XP_010235340.1 plant-specific TFIIIB-related protein PTF2                                                                |
| TCONS_00002733 | 0.0601742 | 0.590929   | 0.484637    | BGIOSGA002489 | XP_015688104.1 ABC transporter G family member 7                                                                         |
| TCONS_00025234 | 0.0602364 | -0.627397  | 0.580901    | BGIOSGA000657 | XP_015695426.1 tyrosyl-DNA phosphodiesterase 1 isoform X1                                                                |
| TCONS_00001245 | 0.0604184 | -0.236528  | -0.634143   | BGIOSGA003873 | XP_006644326.1 PREDICTED: uncharacterized protein LOC102721028                                                           |
| TCONS_00019707 | 0.0604356 | 1.06283    | 1.18282     | BGIOSGA022322 | XP_015693166.1 nucleosome assembly protein 1;2 isoform X1                                                                |
| TCONS_00021891 | 0.0607503 | -0.291573  | 0.658733    | BGIOSGA021631 | XP_002454582.1 transcription termination factor MTERF8, chloroplastic                                                    |
| TCONS_00024633 | 0.0607633 | 0.0911756  | -1.68172    | #N/A          | #N/A                                                                                                                     |
| TCONS_00022720 | 0.061235  | 0.37661    | 0.379228    | BGIOSGA029051 | XP_006657223.1 squamosa promoter-binding-like protein 11                                                                 |
| TCONS_00026961 | 0.0616353 | 0.490669   | 0.159407    | BGIOSGA029511 | XP_006659608.1 pumilio homolog 5                                                                                         |
| TCONS_00022296 | 0.0618707 | 0.0743684  | 0.179571    | BGIOSGA021193 | XP_006651498.1 dihydrolipoylysine-residue acetyltransferase component 1 of pyruvate dehydrogenase complex, mitochondrial |
| TCONS_00023918 | 0.0618803 | -0.760776  | 0.152161    | BGIOSGA025951 | XP_019701983.1 WASH complex subunit FAM21 isoform X1                                                                     |
| TCONS_00014680 | 0.0620181 | 0.112091   | -0.0043408  | BGIOSGA033281 | XP_015692174.1 sphingoid long-chain bases kinase 1-like                                                                  |
| TCONS_00016602 | 0.0621678 | -0.470237  | -0.0691507  | BGIOSGA034397 | XP_015692329.1 cell differentiation protein RCD1 homolog                                                                 |
| TCONS_00033551 | 0.0622505 | 0.589801   | 0.727633    | BGIOSGA000204 | XP_006662956.1 long chain base biosynthesis protein 2a                                                                   |
| TCONS_00031811 | 0.0623704 | 0.398264   | -0.593215   | BGIOSGA007985 | XP_024315700.1 uncharacterized protein LOC100840606 isoform X1                                                           |
| TCONS_00030056 | 0.0623843 | -3.40911   | -0.785894   | BGIOSGA006511 | XP_015696346.1 probable GMP synthase [glutamine-hydrolyzing]                                                             |
| TCONS_00006913 | 0.062435  | 0.397767   | 0.216357    | BGIOSGA009095 | XP_006649067.1 presequence protease 1, chloroplastic/mitochondrial-like                                                  |
| TCONS_00024729 | 0.0626327 | -1.40942   | -0.271936   | BGIOSGA017111 | XP_010227266.2 uncharacterized protein LOC100833242 isoform X2                                                           |
| TCONS_00014744 | 0.0627998 | 0.275052   | 0.425956    | BGIOSGA011777 | XP_006652641.1 coiled-coil domain-containing protein 124-like                                                            |
| TCONS_00022658 | 0.062908  | -0.599883  | 0.560073    | BGIOSGA034468 | XP_006657192.1 lysosomal Pro-X carboxypeptidase                                                                          |
| TCONS_00008112 | 0.0630103 | 0.460405   | -0.520287   | BGIOSGA006338 | XP_006647336.1 pentatricopeptide repeat-containing protein At4g39530-like                                                |
| TCONS_00007087 | 0.0633312 | -1.04755   | -1.47154    | BGIOSGA009269 | XP_015689525.1 F-box protein PP2-B1-like                                                                                 |
| TCONS_00021569 | 0.0633856 | 0.550881   | 1.46243     | BGIOSGA021976 | XP_006655766.1 ribosome production factor 1                                                                              |
| TCONS_00014309 | 0.0634731 | 0.0381656  | 0.49858     | BGIOSGA012541 | XP_015691669.1 protein phosphatase methylesterase 1                                                                      |
| TCONS_00036531 | 0.0635335 | 0.350259   | -0.859126   | BGIOSGA036795 | XP_006663712.1 SAM50-like protein SPAC17C9.06                                                                            |
| TCONS_00022439 | 0.0635669 | -0.252809  | -0.264584   | BGIOSGA027055 | XP_006656171.1 cysteine synthase-like                                                                                    |
| TCONS_00005726 | 0.0636409 | -0.223061  | -0.789001   | BGIOSGA021058 | XP_008677269.1 zinc ion binding protein isoform X1                                                                       |
| TCONS_00022915 | 0.0637632 | 0.462163   | -0.70615    | BGIOSGA017801 | XP_004966469.1 basic leucine zipper 23                                                                                   |
| TCONS_00035642 | 0.0638725 | -0.130293  | 0.00606614  | BGIOSGA003276 | XP_006663861.1 gamma carbonic anhydrase 2, mitochondrial                                                                 |
| TCONS_00035922 | 0.0640414 | -2.36079   | -0.771845   | BGIOSGA040478 | XP_006649309.1 histone-lysine N-methyltransferase SETD1A-like                                                            |
| TCONS_00021202 | 0.0640482 | 1.13312    | -0.0991106  | BGIOSGA034617 | XP_006656342.1 vacuolar-sorting receptor 7                                                                               |
| TCONS_00011201 | 0.064063  | -0.486895  | -0.183592   | BGIOSGA001940 | XP_015690632.1 ADP-ribosylation factor 1-like                                                                            |
| TCONS_00018748 | 0.0640957 | 0.404474   | 0.37378     | BGIOSGA004998 | XP_006654126.1 30S ribosomal protein S31, chloroplastic-like                                                             |
| TCONS_00026473 | 0.0641932 | 1.11682    | 0.487673    | BGIOSGA000169 | XP_003571689.1 p1pin-like protein                                                                                        |
| TCONS_00016051 | 0.0642024 | 1.5961     | 0.102698    | BGIOSGA006174 | XP_006652391.1 PREDICTED: uncharacterized protein LOC102716401                                                           |
| TCONS_00025623 | 0.0642403 | -0.224122  | -0.00410653 | BGIOSGA023811 | XP_004958524.139S ribosomal protein L45, mitochondrial                                                                   |
| TCONS_00009663 | 0.0643492 | -0.176251  | -0.182988   | BGIOSGA009740 | XP_015690960.1 TSL-kinase interacting protein 1                                                                          |



## transcriptome

|                |           |             |             |              |                                                                                       |
|----------------|-----------|-------------|-------------|--------------|---------------------------------------------------------------------------------------|
| TCONS_00007939 | 0.0643643 | -1.35028    | -1.29156    | BGOSGA000589 | XP_006647240.1 synaptotagmin-2-like                                                   |
| TCONS_00019209 | 0.064396  | -2.09943    | -1.68861    | BGOSGA037761 | XP_008649587.1ATPase WRNIP1<br>XP_004961422.1enoyl-CoA delta isomerase 2, peroxisomal |
| TCONS_00019671 | 0.0646695 | -0.00017433 | -0.463396   | BGOSGA002968 | XP_006658888.1 trafficking protein particle complex subunit 3                         |
| TCONS_00024202 | 0.0647409 | -0.625126   | -0.624523   | BGOSGA010567 | XP_006649993.1 glucose-6-phosphate 1-dehydrogenase 4, chloroplastic                   |
| TCONS_00012160 | 0.064999  | -0.0775886  | 0.19362     | BGOSGA010851 | XP_006656708.1PREDICTED: uncharacterized protein LOC102719776, partial                |
| TCONS_00020239 | 0.0650723 | -1.02069    | 0.00735356  | BGOSGA022429 | XP_015690289.1 proline transporter 1-like                                             |
| TCONS_00012816 | 0.0650808 | -1.82269    | -0.373035   | BGOSGA024989 | XP_004956996.1junctophilin-1                                                          |
| TCONS_00030157 | 0.0651379 | -0.0126672  | -0.443393   | BGOSGA028826 | XP_006644978.1 coatomer subunit zeta-3-like                                           |
| TCONS_00002138 | 0.0651774 | 0.230774    | 0.129013    | BGOSGA008061 | XP_015691208.1 E3 ubiquitin-protein ligase RFW3D3-like                                |
| TCONS_00009153 | 0.0653131 | -0.0767957  | 0.398999    | BGOSGA031471 | XP_006663051.1 mitochondrial inner membrane protease subunit 1                        |
| TCONS_00035211 | 0.0654074 | 0.422882    | 0.630768    | BGOSGA033616 | XP_006647611.1 probable receptor-like protein kinase At5g47070                        |
| TCONS_00008499 | 0.0654107 | -0.0619948  | -0.505837   | BGOSGA032009 | XP_006653574.2 trafficking protein particle complex II-specific subunit 120 homolog   |
| TCONS_00014553 | 0.0656388 | -0.0439589  | 0.438251    | BGOSGA016716 | XP_015688509.1 sterol 3-beta-glucosyltransferase UGT80B1                              |
| TCONS_00005654 | 0.0658334 | 0.119213    | 1.13365     | BGOSGA007769 | XP_006656840.1 pyrophosphate-fructose 6-phosphate 1-phosphotransferase subunit beta   |
| TCONS_00021972 | 0.0661233 | 0.0664416   | 0.354077    | BGOSGA021542 | XP_006652038.1 probable ADP-ribosylation factor GTPase-activating protein AGD9        |
| TCONS_00013560 | 0.0661837 | 0.206095    | -0.0335578  | BGOSGA031346 | XP_002444515.1tuliposide A-converting enzyme 1, chloroplastic                         |
| TCONS_00028170 | 0.0662273 | -0.963746   | -0.47876    | BGOSGA024334 | XP_015688832.1 probable receptor-like protein kinase At1g80640                        |
| TCONS_00007472 | 0.0669427 | -2.44992    | -0.412903   | BGOSGA026026 | XP_006647354.1PREDICTED: uncharacterized protein LOC102710758                         |
| TCONS_00006226 | 0.0671492 | 0.677752    | 1.22911     | BGOSGA018829 | XP_006661033.1 flowering time control protein FCA-like                                |
| TCONS_00028558 | 0.0671516 | 0.918983    | 0.387408    | BGOSGA030303 | XP_006652645.2 Niemann-Pick C1 protein-like                                           |
| TCONS_00016424 | 0.0672551 | 1.00454     | 0.466726    | BGOSGA014543 | XP_003561933.1 uncharacterized protein LOC100834465                                   |
| TCONS_00017046 | 0.067322  | 0.276157    | 0.272185    | BGOSGA011863 | XP_004957095.1protein ROOT PRIMORDIUM DEFECTIVE 1                                     |
| TCONS_00029207 | 0.0674493 | 0.0133405   | -0.00786136 | BGOSGA033898 | XP_015694090.1 spastin isoform X2                                                     |
| TCONS_00020052 | 0.0674674 | 0.155252    | 1.10953     | BGOSGA027570 | XP_006663372.1 pre-rRNA-processing protein TSR1 homolog                               |
| TCONS_00033332 | 0.0675234 | 1.18741     | 1.0504      | BGOSGA035161 | XP_015690432.1 alpha-ketoglutarate-dependent dioxygenase AlkB-like                    |
| TCONS_00011215 | 0.067673  | -2.40828    | -1.37862    | BGOSGA013818 | XP_012701813.1classical arabinogalactan protein 9                                     |
| TCONS_00002682 | 0.0677281 | -4.1036     | -1.11203    | BGOSGA002539 | XP_006664874.2 biogenesis of lysosome-related organelles complex 1 subunit 1-like     |
| TCONS_00035908 | 0.0677592 | -0.485207   | 0.678274    | BGOSGA040457 | XP_006662065.2 protein ARABIDILLO 1-like                                              |
| TCONS_00032714 | 0.0678521 | 0.544614    | 0.89781     | BGOSGA031393 | XP_015696733.1 uncharacterized ATP-dependent helicase C29A10.10c-like                 |
| TCONS_00030295 | 0.068436  | 0.0063451   | 0.0971928   | BGOSGA016421 | XP_006650102.1 ER membrane protein complex subunit 4                                  |
| TCONS_00012302 | 0.0684712 | 0.225146    | 0.228062    | BGOSGA010693 | XP_015688792.1 20 kDa chaperonin, chloroplastic-like                                  |
| TCONS_00008923 | 0.0684864 | -4.10456    | -0.891538   | BGOSGA029691 | XP_004955547.1eukaryotic translation initiation factor 3 subunit I                    |
| TCONS_00027783 | 0.0685187 | 1.43613     | 0.608561    | BGOSGA018691 | XP_003571119.1glucosyltransferase 1                                                   |
| TCONS_00007515 | 0.0687383 | -3.46941    | -0.748015   | BGOSGA017741 | XP_015689138.1 sugar transport protein 5-like                                         |
| TCONS_00006314 | 0.0687463 | -0.397756   | -0.635026   | BGOSGA036166 | XP_006644154.1 protein SRG1-like                                                      |
| TCONS_00000895 | 0.0690808 | #NA         | #NA         | BGOSGA000168 | XP_006661959.1 sphingoid long-chain bases kinase 1-like                               |
| TCONS_00031463 | 0.0691549 | 0.811682    | -0.0238695  | BGOSGA016850 | XP_006650663.2 L-type lectin-domain containing receptor kinase IV.1-like              |
| TCONS_00011042 | 0.0696878 | -0.037639   | 0.850546    | BGOSGA033351 | XP_006657630.1 ATG8-interacting protein 1                                             |
| TCONS_00023537 | 0.0699012 | -0.0101845  | -0.158786   | BGOSGA015877 | XP_015696697.1 protein transport protein Sec61 subunit alpha-like isoform X1          |
| TCONS_00029881 | 0.0699791 | 0.693104    | 0.369521    | BGOSGA027570 | XP_015692399.1 protein CHROMATIN REMODELING 24-like                                   |
| TCONS_00016936 | 0.0701284 | 0.302918    | 0.0958169   | BGOSGA014029 | XP_006654369.1 endo-1,3;1,4-beta-D-glucanase-like                                     |
| TCONS_00017766 | 0.0701963 | -0.474044   | -1.90098    | BGOSGA028248 | XP_006654797.1PREDICTED: uncharacterized protein ycf23-like                           |
| TCONS_00019801 | 0.0705192 | -0.521175   | 0.446431    | BGOSGA017554 | XP_015689027.1PREDICTED: uncharacterized protein LOC102719651, partial                |
| TCONS_00006124 | 0.0707875 | -0.589639   | 0.441363    | BGOSGA016267 | XP_006650221.1 uncharacterized isomerase BH0283-like                                  |
| TCONS_00010359 | 0.0709504 | -2.52271    | -0.120073   | BGOSGA012941 | XP_006661078.1PREDICTED: uncharacterized protein LOC102721193                         |
| TCONS_00029748 | 0.0710602 | 0.388359    | 0.155682    | BGOSGA027147 | XP_006649864.2 zinc finger protein 652-A                                              |
| TCONS_00012022 | 0.0712007 | 0.70058     | 1.35982     | BGOSGA003899 | XP_004976131.2gamma-tubulin complex component 2                                       |
| TCONS_00014551 | 0.0715452 | -0.649773   | 0.56102     | BGOSGA016714 | XP_006652294.1 40S ribosomal protein S10                                              |
| TCONS_00006241 | 0.0716423 | -0.263899   | 0.0297937   | BGOSGA016432 | XP_015693518.1 transcription factor bHLH155-like                                      |
| TCONS_00021928 | 0.071813  | -0.739528   | -1.5917     | BGOSGA000583 | XP_006653028.1 katanin p80 WD40 repeat-containing subunit B1-like                     |
| TCONS_00016876 | 0.0718401 | -1.72429    | -1.11193    | BGOSGA004568 | XP_003558900.1NADH dehydrogenase [ubiquinone] 1 beta subcomplex subunit 7             |
| TCONS_00011500 | 0.0719288 | 1.20309     | 1.06661     | BGOSGA011526 | XP_004959299.1 uncharacterized protein LOC101757514                                   |
| TCONS_00029686 | 0.0723962 | 0.414066    | -0.708623   | BGOSGA030389 | XP_003568116.1tubby-like F-box protein 9                                              |
| TCONS_00018126 | 0.0724584 | 0.283017    | 1.02368     | BGOSGA017392 |                                                                                       |

## transcriptome

|                |           |           |            |              |                                                                                          |
|----------------|-----------|-----------|------------|--------------|------------------------------------------------------------------------------------------|
| TCONS_00011517 | 0.072621  | 0.760674  | 1.64617    | BGOSGA010892 | XP_006649346.2 probable acyl-activating enzyme 1, peroxisomal                            |
| TCONS_00030068 | 0.0726511 | 0.659334  | 0.27739    | BGOSGA009198 | XP_006660636.1 AUGMIN subunit 8-like                                                     |
| TCONS_00023144 | 0.0726522 | 0.601389  | 1.0126     | BGOSGA013222 | XP_004955489.1myristoylated alanine-rich C-kinase substrate                              |
| TCONS_00009340 | 0.0727244 | 0.593399  | -0.0790563 | BGOSGA012751 | XP_006663032.1 40S ribosomal protein S9-2-like                                           |
| TCONS_00028729 | 0.0728179 | 0.662784  | -0.126868  | BGOSGA030482 | XP_015696295.1 mediator of RNA polymerase II transcription subunit 25                    |
| TCONS_00001926 | 0.0729927 | -1.73029  | 0.25621    | BGOSGA024055 | XP_006644800.2 zinc-metallopeptidase, peroxisomal-like                                   |
| TCONS_00016249 | 0.0732497 | #NA       | -1.12577   | BGOSGA034558 | XP_003581423.2probable inactive beta-glucosidase 14 isoform X1                           |
| TCONS_00035144 | 0.0735354 | -0.103201 | 0.0333861  | BGOSGA035534 | XP_006663029.1 transcription factor bHLH47-like isoform X1                               |
| TCONS_00026136 | 0.0735478 | -0.376228 | 0.500557   | BGOSGA014376 | XP_015695528.1 protein strawberry notch homolog 1-like                                   |
| TCONS_00020964 | 0.0736681 | 1.28466   | 0.348954   | BGOSGA023187 | XP_015693421.1 UDP-galactose/UDP-glucose transporter 3-like                              |
| TCONS_00008940 | 0.0737361 | 0.264349  | -0.328406  | BGOSGA005466 | XP_004954172.1diacylglycerol kinase 7                                                    |
| TCONS_00009456 | 0.0737726 | -0.489803 | 0.559073   | BGOSGA012004 | XP_006651110.2 uroporphyrinogen-III synthase, chloroplastic                              |
| TCONS_00007484 | 0.0739446 | -0.806587 | -1.39753   | BGOSGA014346 | XP_006648389.2 myosin heavy chain, clone 203                                             |
| TCONS_00006613 | 0.0740062 | 0.865761  | 1.73034    | BGOSGA008779 | XP_006647660.1 tRNA pseudouridine synthase A, mitochondrial-like                         |
| TCONS_00010014 | 0.0740534 | -1.12253  | -0.230144  | BGOSGA012564 | XP_004984476.1photosystem II repair protein PSB27-H1, chloroplastic                      |
| TCONS_00022340 | 0.0741568 | 1.36041   | -0.364823  | BGOSGA028889 | NP_001145340.1uncharacterized protein LOC100278669                                       |
| TCONS_00004131 | 0.074308  | 0.40049   | 0.435339   | BGOSGA000819 | XP_006654794.1 60S ribosomal protein L18a-like                                           |
| TCONS_00017602 | 0.0743794 | 0.900962  | 0.0131089  | BGOSGA003020 | XP_006655220.2 chlorophyll synthase, chloroplastic                                       |
| TCONS_00016549 | 0.0746335 | 1.15045   | 0.628778   | BGOSGA006676 | XP_015692306.1 GPCR-type G protein COLD1                                                 |
| TCONS_00004490 | 0.0746444 | -0.171367 | 0.657601   | BGOSGA000730 | XP_006644787.1PREDICTED: uncharacterized protein LOC102716265                            |
| TCONS_00010773 | 0.0747998 | 0.294592  | 0.420311   | BGOSGA013398 | XP_015690031.1PREDICTED: uncharacterized protein LOC102700606                            |
| TCONS_00027213 | 0.0753217 | -1.03937  | -0.801481  | BGOSGA012721 | XP_004972417.1 protein DMP3                                                              |
| TCONS_00030785 | 0.0753482 | -0.354707 | 0.756336   | BGOSGA032594 | XP_006661659.1 maspardin                                                                 |
| TCONS_00020241 | 0.0754737 | -0.514455 | -0.292055  | BGOSGA023368 | XP_006655852.1 two-component response regulator ORR22                                    |
| TCONS_00017019 | 0.0755633 | 0.55981   | 0.311481   | BGOSGA019066 | XP_006653977.1 E3 UFM1-protein ligase 1 homolog                                          |
| TCONS_00024703 | 0.0756265 | 0.482301  | 0.343612   | BGOSGA026446 | XP_006658363.1 DDT domain-containing protein DDR4-like                                   |
| TCONS_00009569 | 0.0758057 | -2.29711  | 0.199669   | BGOSGA012117 | XP_006649637.1 microtubule-associated protein 70-4-like                                  |
| TCONS_00025740 | 0.0761973 | 0.105051  | 0.309529   | BGOSGA026432 | XP_006658987.1 aldehyde dehydrogenase 22A1                                               |
| TCONS_00032281 | 0.0762016 | -0.120172 | 0.661716   | BGOSGA037565 | XP_015697153.1 FH protein interacting protein FIP2-like isoform X2                       |
| TCONS_00000516 | 0.0763454 | 0.344794  | 0.547714   | BGOSGA008052 | XP_006643966.1 KH domain-containing protein At4g18375-like                               |
| TCONS_00032171 | 0.0763536 | 0.339278  | 0.604164   | BGOSGA031967 | XP_006649068.1 phenylalanine-tRNA ligase alpha subunit, cytoplasmic                      |
| TCONS_00007300 | 0.0768489 | 0.401226  | 0.448718   | BGOSGA007183 | XP_006648286.1 pentatricopeptide repeat-containing protein At4g04790, mitochondrial-like |
| TCONS_00030556 | 0.0768965 | 1.164     | 0.543781   | BGOSGA005053 | XP_015696607.1 serine/threonine-protein kinase CTR1-like                                 |
| TCONS_00024316 | 0.0771135 | -1.66197  | 0.869906   | BGOSGA016077 | XP_015695123.1PREDICTED: uncharacterized protein LOC102703991                            |
| TCONS_00002930 | 0.0771447 | -0.397948 | 0.554537   | BGOSGA027158 | XP_006645545.1PREDICTED: uncharacterized protein LOC102706803                            |
| TCONS_00016559 | 0.0771577 | -1.1637   | -1.1784    | BGOSGA028258 | XP_006652770.1 E3 ubiquitin-protein ligase RLIM                                          |
| TCONS_00002243 | 0.0772173 | -1.11994  | -4.72628   | BGOSGA019271 | XP_002456704.1photosystem II 22 kDa protein, chloroplastic                               |
| TCONS_00002312 | 0.0772215 | 0.37807   | 0.130176   | BGOSGA004954 | XP_006646550.1 signal recognition particle subunit SRP72                                 |
| TCONS_00033077 | 0.0775113 | -3.95838  | -0.510543  | BGOSGA034918 | XP_006662778.1 dirigent protein 22-like                                                  |
| TCONS_00024370 | 0.0777879 | 0.960568  | -0.583934  | BGOSGA012543 | XP_021310045.1ricin B-like lectin R40G3                                                  |
| TCONS_00023073 | 0.0778508 | 0.0458512 | 0.257845   | BGOSGA025103 | XP_012704125.1transcription termination factor MTERF2, chloroplastic                     |
| TCONS_00010769 | 0.0779117 | 0.24314   | 0.0899481  | BGOSGA000202 | XP_006650445.1 ethylene-insensitive protein 2-like                                       |
| TCONS_00005831 | 0.0779146 | 1.2427    | 0.00495768 | BGOSGA007956 | XP_015689407.1 probable plastidic glucose transporter 2                                  |
| TCONS_00020972 | 0.0779783 | 0.514974  | -0.254339  | BGOSGA005941 | XP_015693624.1 palmitoyl-acyl carrier protein thioesterase, chloroplastic-like           |
| TCONS_00003004 | 0.0783047 | -1.34634  | -0.529155  | BGOSGA021030 | XP_006643866.1 pollen-specific protein SF21-like                                         |
| TCONS_00024448 | 0.0783459 | -0.470606 | -0.0400149 | #N/A         | #N/A                                                                                     |
| TCONS_00024461 | 0.078395  | #NA       | -1.30519   | BGOSGA033951 | XP_015694933.1 mavicyanin-like                                                           |
| TCONS_00036235 | 0.0785066 | 1.3097    | 0.115458   | BGOSGA023666 | XP_021302165.1phosphoinositide phospholipase C 2                                         |
| TCONS_00013254 | 0.0790787 | -0.754611 | 0.297652   | BGOSGA036746 | XP_015697991.1PREDICTED: uncharacterized protein LOC102704371 isoform X3                 |
| TCONS_00011190 | 0.0793037 | 0.514789  | 0.427248   | BGOSGA021815 | XP_022679005.1probable galactinol-sucrose galactosyltransferase 2                        |
| TCONS_00013099 | 0.0793156 | 0.785659  | -0.35203   | BGOSGA005913 | XP_015690047.1PREDICTED: uncharacterized protein LOC102700607                            |
| TCONS_00004310 | 0.0793315 | 0.778307  | 0.300496   | BGOSGA001259 | XP_002458418.1RGG repeats nuclear RNA binding protein C                                  |

## transcriptome

|                |           |            |            |               |                                                                                                 |
|----------------|-----------|------------|------------|---------------|-------------------------------------------------------------------------------------------------|
| TCONS_00018493 | 0.0793538 | -0.34602   | 0.531937   | BGIOSGA018940 | XP_006653970.1PREDICTED: uncharacterized protein LOC102717986 isoform X1                        |
| TCONS_00023300 | 0.0793551 | 0.601085   | 0.208004   | BGIOSGA024648 | XP_004955762.1exocyst complex component EXO84B                                                  |
| TCONS_00001900 | 0.0795001 | 0.384625   | 0.0150793  | BGIOSGA004534 | XP_015699269.1 protein MON2 homolog isoform X1                                                  |
| TCONS_00026647 | 0.0795374 | 0.700674   | 0.456385   | BGIOSGA028715 | XP_006659426.1 NADH-ubiquinone oxidoreductase 20.9 kDa subunit                                  |
| TCONS_00000203 | 0.0795547 | 0.336786   | 0.0739793  | BGIOSGA002774 | XP_006643753.1 protein IWS1 homolog                                                             |
| TCONS_00028019 | 0.0796241 | 0.70046    | 0.778499   | BGIOSGA026972 | XP_006660129.1 DEAD-box ATP-dependent RNA helicase 29                                           |
| TCONS_00027489 | 0.079742  | 3.37758    | 1.23187    | BGIOSGA011492 | XP_015695984.1 putative aconitate hydratase, cytoplasmic                                        |
| TCONS_00011970 | 0.0798766 | -1.19094   | -2.21057   | BGIOSGA004865 | XP_006649814.1 fructose-1,6-bisphosphatase, chloroplastic                                       |
| TCONS_00001872 | 0.0799776 | 0.405147   | -0.583411  | BGIOSGA004505 | XP_006644753.1 exocyst complex component EXO70B1-like                                           |
| TCONS_00022955 | 0.0800948 | 1.33427    | 0.197353   | BGIOSGA017360 | XP_002437649.1clathrin light chain 2                                                            |
| TCONS_00036694 | 0.0800958 | -0.630363  | 0.274063   | BGIOSGA003265 | XP_015698657.1 transcription factor TGA6-like                                                   |
| TCONS_00011504 | 0.0801352 | -0.0577015 | 0.564879   | BGIOSGA011522 | XP_004985847.1cancer-related nucleoside-triphosphatase                                          |
| TCONS_00035082 | 0.0804258 | -0.409826  | 0.356173   | BGIOSGA035516 | XP_004985754.1uncharacterized protein LOC101779601                                              |
| TCONS_00008703 | 0.0804365 | 0.551981   | 0.805127   | BGIOSGA031003 | XP_015688714.1 PRELI domain containing protein 3B                                               |
| TCONS_00034739 | 0.0804385 | -0.284772  | 0.26471    | BGIOSGA030435 | XP_004979204.1protein krasavietz                                                                |
| TCONS_00033987 | 0.080496  | -1.63087   | -1.49246   | BGIOSGA024959 | XP_015696687.1 polycomb group protein EMBRYONIC FLOWER 2                                        |
| TCONS_00016903 | 0.0807746 | -0.08087   | 0.614587   | BGIOSGA013026 | XP_006653899.1 ribosome biogenesis regulatory protein homolog                                   |
| TCONS_00029393 | 0.0808135 | 0.743129   | 1.36362    | BGIOSGA022661 | XP_015696681.1 probable inactive purple acid phosphatase 29                                     |
| TCONS_00002105 | 0.0808218 | 0.0121316  | -0.82923   | BGIOSGA019052 | XP_006646447.1 internal alternative NAD(P)-ubiquinone oxidoreductase A1, mitochondrial-like     |
| TCONS_00021256 | 0.0809861 | -0.894518  | -1.81561   | BGIOSGA011222 | XP_010267846.1 putative beta-glucosidase 41 isoform X3                                          |
| TCONS_00024006 | 0.0810432 | -0.140429  | -0.485581  | BGIOSGA032095 | XP_006657900.1 formin-like protein 13                                                           |
| TCONS_00031398 | 0.0813624 | 0.28079    | 0.592563   | BGIOSGA016808 | XP_015697181.1 lanC-like protein GCR2                                                           |
| TCONS_00002567 | 0.0815572 | 0.295329   | 0.556841   | BGIOSGA005211 | XP_021312544.1RRP12-like protein                                                                |
| TCONS_00022857 | 0.0818427 | 0.125949   | 0.0791773  | BGIOSGA020587 | XP_006657303.1 UDP-sugar pyrophosphorylase                                                      |
| TCONS_00007738 | 0.081849  | -0.0045404 | -0.0546123 | BGIOSGA017219 | XP_006647130.1PREDICTED: uncharacterized protein LOC102713982                                   |
| TCONS_00003154 | 0.0818826 | 0.0162457  | -0.259262  | BGIOSGA004605 | XP_006643957.2 salt stress root protein RS1-like                                                |
| TCONS_00003379 | 0.0819125 | 1.34365    | 0.268129   | BGIOSGA001838 | XP_010230815.1probable tRNA N6-adenosine threonylcarbamoyltransferase, mitochondrial isoform X3 |
| TCONS_00015736 | 0.0819488 | 0.822758   | 0.711265   | BGIOSGA006431 | XP_015692156.1 ras GTPase-activating protein-binding protein 1                                  |
| TCONS_00029489 | 0.0821012 | 0.793836   | -0.238038  | BGIOSGA027234 | XP_004957602.1protein PHOX1                                                                     |
| TCONS_00000669 | 0.0821092 | 0.241574   | -1.01103   | BGIOSGA003256 | XP_010237097.2putative protease Do-like 14                                                      |
| TCONS_00013077 | 0.0822187 | -0.395214  | 0.0271511  | BGIOSGA011159 | XP_006650507.2 protein NRT1/ PTR FAMILY 8.3-like                                                |
| TCONS_00024790 | 0.0823151 | 0.241315   | 0.824963   | BGIOSGA025907 | XP_015694572.1 F-box/FBD/LRR-repeat protein At4g00160-like                                      |
| TCONS_00018294 | 0.0824139 | -1.32961   | -1.10668   | BGIOSGA021697 | XP_006654776.1 photosystem I reaction center subunit VI, chloroplastic                          |
| TCONS_00006721 | 0.0825987 | 0.444493   | 0.703969   | BGIOSGA023242 | XP_006647768.1 ATPase family AAA domain-containing protein 3C-like                              |
| TCONS_00004966 | 0.0827227 | 0.335817   | 0.96078    | BGIOSGA000256 | XP_004971045.1E3 ubiquitin-protein ligase Smurf1 isoform X1                                     |
| TCONS_00034172 | 0.0828233 | -0.17436   | 0.0378339  | BGIOSGA032100 | XP_006664280.1 vacuolar-sorting receptor 1-like                                                 |
| TCONS_00008815 | 0.0828831 | 0.0355659  | -0.271548  | BGIOSGA022570 | XP_006647896.1 alkylated DNA repair protein alkB homolog 8                                      |
| TCONS_00007817 | 0.0828993 | 0.212597   | 0.0696699  | BGIOSGA006669 | XP_015689378.1PREDICTED: uncharacterized protein LOC102705977                                   |
| TCONS_00005972 | 0.0829173 | -0.138433  | -0.0627453 | BGIOSGA008107 | XP_006664824.1 AUGMIN subunit 6 isoform X2                                                      |
| TCONS_00025082 | 0.0833159 | -0.131218  | 0.314899   | BGIOSGA024320 | XP_006647244.1 protein CTR9 homolog                                                             |
| TCONS_00004936 | 0.0834065 | -0.373835  | 1.18515    | BGIOSGA010790 | XP_015694821.1 histone deacetylase HDT2-like                                                    |
| TCONS_00037563 | 0.0835316 | -0.337781  | 1.2663     | BGIOSGA036577 | XP_006663847.1 deoxyhypusine hydroxylase-A                                                      |
| TCONS_00036294 | 0.0835463 | 2.75332    | 2.58414    | BGIOSGA037656 | XP_002466839.1mitochondrial import receptor subunit TOM5 homolog                                |
| TCONS_00015067 | 0.083772  | -0.687412  | -0.582491  | BGIOSGA020610 | XP_006652918.1 probable E3 ubiquitin-protein ligase HIP1 isoform X1                             |
| TCONS_00013414 | 0.0838308 | -0.48765   | -0.481175  | BGIOSGA028213 | XP_006650792.1 serine/threonine-protein kinase HT1                                              |
| TCONS_00001023 | 0.0838473 | -0.828809  | 0.700952   | BGIOSGA003625 | XP_006644224.1 AP-3 complex subunit delta                                                       |
| TCONS_00009258 | 0.08407   | -1.68118   | -2.54248   | BGIOSGA037562 | XP_006663045.1 patatin-like protein 1                                                           |
| TCONS_00031391 | 0.0840797 | 0.609      | 0.363233   | BGIOSGA033203 | XP_006661906.1PREDICTED: uncharacterized protein LOC102711185                                   |
| TCONS_00022526 | 0.0841397 | 1.64355    | 1.38078    | BGIOSGA008501 | XP_006656216.1 DNA-directed RNA polymerase III subunit rpoC                                     |
| TCONS_00006374 | 0.0842665 | 0.488497   | 0.610842   | BGIOSGA004558 | XP_006647451.1 eukaryotic translation initiation factor 4B1                                     |
| TCONS_00000830 | 0.0844172 | 1.00021    | 0.420137   | BGIOSGA007895 | XP_006645847.1 GDSL esterase/lipase At1g09390-like                                              |
| TCONS_00010953 | 0.0845283 | 0.717221   | 0.478185   | BGIOSGA004205 | XP_021302677.1YTH domain-containing family protein 1 isoform X2                                 |
| TCONS_00019424 | 0.0845652 | 0.0107424  | 0.264238   | BGIOSGA017930 | XP_006654503.1PREDICTED: uncharacterized protein At2g39795, mitochondrial                       |
| TCONS_00011114 | 0.0845727 | 0.161078   | 0.0734101  | BGIOSGA018634 | XP_014752719.1casein kinase 1-like protein HD16                                                 |

## transcriptome

|                |           |            |            |               |                                                                                            |
|----------------|-----------|------------|------------|---------------|--------------------------------------------------------------------------------------------|
| TCONS_00019443 | 0.0849672 | -0.611495  | -1.36786   | BGIOSGA025900 | XP_004961835.1probable histone H2A.4                                                       |
| TCONS_00031589 | 0.0849745 | 0.019754   | -0.273535  | BGIOSGA004605 | XP_006662027.1 carotene epsilon-monoxygenase, chloroplastic                                |
| TCONS_00005672 | 0.0850318 | -0.737993  | 0.392752   | BGIOSGA007795 | XP_015688512.1 probable 28S rRNA (cytosine-C(5))-methyltransferase                         |
| TCONS_00005838 | 0.0852103 | 1.33305    | #NA        | BGIOSGA024549 | XP_021307881.1 uncharacterized protein LOC8081771                                          |
| TCONS_00000220 | 0.0853508 | 0.414516   | -0.58714   | BGIOSGA028022 | XP_006645501.1 inner membrane protein ALBINO3, chloroplastic                               |
| TCONS_00005031 | 0.085489  | 0.331502   | 0.30146    | BGIOSGA033850 | XP_006645281.2 heparan-alpha-glucosaminide N-acetyltransferase-like                        |
| TCONS_00029181 | 0.08552   | -1.94179   | -1.75777   | BGIOSGA021819 | XP_006660714.1 PREDICTED: uncharacterized protein LOC102717924                             |
| TCONS_00022749 | 0.0856612 | 0.775424   | 0.655912   | BGIOSGA035743 | XP_006656359.1 protein REVEILLE 6-like isoform X3                                          |
| TCONS_00005608 | 0.0857483 | -0.53136   | -0.303779  | BGIOSGA007721 | XP_006646994.1 mediator of RNA polymerase II transcription subunit 18                      |
| TCONS_00021078 | 0.085942  | -0.4889    | 0.616166   | BGIOSGA023305 | XP_003563591.1 UPF0690 protein C1orf52 homolog isoform X2                                  |
| TCONS_00016437 | 0.0861703 | -0.203074  | -0.389033  | BGIOSGA007108 | XP_006653681.1 PREDICTED: uncharacterized protein LOC102712079                             |
| TCONS_00032192 | 0.0863652 | 0.168231   | 0.472306   | BGIOSGA032892 | XP_015696991.1 protein NEN1-like                                                           |
| TCONS_00013548 | 0.0865804 | -0.112948  | -0.0642527 | BGIOSGA009427 | XP_006650904.1 26S proteasome non-ATPase regulatory subunit 12 homolog A-like              |
| TCONS_00005565 | 0.0865955 | 0.272778   | 0.067105   | BGIOSGA020786 | NP_001169973.1 putative knotted-like transcription factor family protein                   |
| TCONS_00036776 | 0.0866015 | 0.959195   | 0.518553   | BGIOSGA036540 | XP_006663864.1 monothiol glutaredoxin-S12, chloroplastic                                   |
| TCONS_00019205 | 0.0866439 | -2.24342   | -1.37482   | BGIOSGA019010 | XP_006654341.1 annexin D4                                                                  |
| TCONS_00003633 | 0.0866788 | 0.213434   | 0.875921   | BGIOSGA003435 | XP_006644199.1 AMSH-like ubiquitin thioesterase 3                                          |
| TCONS_00024641 | 0.0866962 | 1.1867     | 0.354067   | BGIOSGA018969 | XP_006657489.1 PREDICTED: uncharacterized protein LOC102719216                             |
| TCONS_00029841 | 0.0869639 | -0.247164  | 0.487836   | BGIOSGA019011 | XP_006660543.1 putative disease resistance protein RGA1 isoform X1                         |
| TCONS_00024177 | 0.0870786 | -2.57898   | 0.25005    | BGIOSGA010954 | NP_001147403.2 hydrophobic protein LT16A                                                   |
| TCONS_00015148 | 0.0871508 | -0.355071  | -0.529715  | BGIOSGA000480 | XP_006652995.1 reticulon-like protein B11                                                  |
| TCONS_00018892 | 0.0872519 | 0.479741   | 0.00857664 | BGIOSGA020447 | XP_015690988.1 zinc finger BED domain-containing protein RICESLEEPER 2                     |
| TCONS_00019452 | 0.0873769 | 0.296652   | 0.322985   | BGIOSGA017901 | XP_00665387.1 E3 ubiquitin-protein ligase UPL4 isoform X1                                  |
| TCONS_00028869 | 0.0874114 | -0.259478  | -0.52268   | BGIOSGA017612 | NP_001140205.1 uncharacterized protein LOC100272233                                        |
| TCONS_00016406 | 0.0877189 | -0.11877   | 0.0250597  | BGIOSGA033410 | XP_015691538.1 branched-chain-amino-acid aminotransferase 5, chloroplastic-like            |
| TCONS_00031896 | 0.0877411 | -0.678436  | -1.72375   | BGIOSGA032246 | XP_003573808.1 deoxyribodipyrimidine photolyase                                            |
| TCONS_00009246 | 0.0877722 | 0.814048   | 0.209711   | BGIOSGA011776 | XP_006649337.1 thiol-disulfide oxidoreductase LTO1 isoform X2                              |
| TCONS_00021143 | 0.0878144 | 0.869251   | 0.444581   | BGIOSGA009164 | XP_002437354.1 probable LIM domain-containing serine/threonine-protein kinase DDB_G0286997 |
| TCONS_00021921 | 0.0878531 | 0.506128   | 0.376456   | BGIOSGA015052 | XP_006656814.2 serine/threonine-protein kinase EDR1-like                                   |
| TCONS_00014219 | 0.0878649 | -3.11595   | -1.94274   | BGIOSGA004853 | XP_008669437.1 uncharacterized protein LOC103646490 isoform X1                             |
| TCONS_00002617 | 0.088001  | -0.650887  | 0.584378   | BGIOSGA020386 | XP_015699275.1 BTB/POZ domain-containing protein FBL11-like                                |
| TCONS_00001299 | 0.0880219 | -1.73495   | -1.55752   | BGIOSGA021813 | XP_003569313.1 transcription factor MYBS3                                                  |
| TCONS_00008211 | 0.0882275 | -0.0220106 | 0.88916    | BGIOSGA026838 | NP_001152223.2 salt tolerant protein                                                       |
| TCONS_00008213 | 0.0882354 | 0.88958    | -0.692455  | BGIOSGA006222 | XP_010235574.1 thioredoxin-like 4, chloroplastic isoform X3                                |
| TCONS_00026469 | 0.0882665 | 1.87397    | 0.943084   | BGIOSGA011700 | XP_021320072.1 uncharacterized protein LOC8064003                                          |
| TCONS_00010649 | 0.0883434 | 0.43447    | -0.152486  | BGIOSGA015052 | XP_004982227.1 ARF guanine-nucleotide exchange factor GNOM                                 |
| TCONS_00002958 | 0.0883663 | -0.143281  | -0.38398   | BGIOSGA016472 | XP_006647617.1 GTP-binding protein YPTM2                                                   |
| TCONS_00014388 | 0.0886315 | -0.839508  | -0.891587  | #N/A          | XP_009401412.1 PREDICTED: uncharacterized protein LOC103985441                             |
| TCONS_00023360 | 0.0886756 | 0.443812   | -0.111346  | BGIOSGA001940 | XP_004955819.1 ADP-ribosylation factor 1                                                   |
| TCONS_00014350 | 0.0887025 | -0.765986  | -0.931618  | BGIOSGA016510 | XP_006652344.1 FK506-binding protein 2-like                                                |
| TCONS_00007671 | 0.0889338 | 0.0508232  | -0.131644  | BGIOSGA007862 | XP_015692361.1 altered inheritance rate of mitochondria protein 25                         |
| TCONS_00031803 | 0.0891336 | -0.380917  | -0.389298  | BGIOSGA012212 | XP_006661622.1 uncharacterized GTP-binding protein At5g64813                               |
| TCONS_00030620 | 0.089384  | -0.285011  | -0.366643  | BGIOSGA028363 | XP_015696919.1 formin-like protein 3                                                       |
| TCONS_00028312 | 0.0895178 | 0.0839357  | 0.355627   | BGIOSGA019016 | XP_015695702.1 spindle pole body component 110-like                                        |
| TCONS_00025087 | 0.0895523 | -0.0871757 | 0.12295    | BGIOSGA007257 | XP_006657694.1 serine carboxypeptidase-like                                                |
| TCONS_00021384 | 0.0896346 | 0.0348281  | -0.0568005 | BGIOSGA026520 | XP_006656499.1 NEP1-interacting protein-like 1                                             |
| TCONS_00020675 | 0.0898674 | 0.0623154  | -0.0638388 | BGIOSGA008023 | XP_015694312.1 nicotianamine aminotransferase A-like isoform X2                            |
| TCONS_00009354 | 0.0900295 | 0.554213   | -0.465179  | BGIOSGA016744 | XP_004985627.1 probable serine/threonine-protein kinase PBL16                              |
| TCONS_00036921 | 0.0900998 | -0.351742  | -0.0514921 | BGIOSGA036406 | XP_006663927.1 PREDICTED: uncharacterized protein LOC102712212 isoform X2                  |
| TCONS_00017819 | 0.0901389 | 0.790315   | 0.724331   | BGIOSGA019879 | XP_015692750.1 protease Do-like 10, mitochondrial                                          |
| TCONS_00028425 | 0.0902365 | -1.35402   | -0.124428  | BGIOSGA016943 | XP_006659655.1 RHOMBOD-like protein 2                                                      |
| TCONS_00032600 | 0.090258  | 1.08849    | 1.70348    | BGIOSGA005165 | XP_006661977.1 glutathione S-transferase U17-like                                          |
| TCONS_00019924 | 0.0903352 | -0.253637  | 0.676433   | BGIOSGA024281 | XP_004960972.1 nucleoside diphosphate kinase 3                                             |
| TCONS_00036780 | 0.0904425 | 0.430654   | 0.651541   | BGIOSGA037759 | XP_006664178.1 eukaryotic translation initiation factor 2 subunit gamma                    |

transcriptome

|                |           |            |             |               |                                                                                                       |
|----------------|-----------|------------|-------------|---------------|-------------------------------------------------------------------------------------------------------|
| TCONS_00033660 | 0.0904656 | -0.596274  | 0.702958    | BGIOSGA035440 | XP_006662981.1 endothelin-converting enzyme 2                                                         |
| TCONS_00009830 | 0.0905958 | 0.788065   | 1.50991     | BGIOSGA012382 | XP_010228758.1 cytochrome c oxidase assembly protein cox16, mitochondrial                             |
| TCONS_00026096 | 0.0906744 | -1.43624   | -0.75092    | BGIOSGA025886 | XP_015695988.1 probable LRR receptor-like serine/threonine-protein kinase At1g56140                   |
| TCONS_00002173 | 0.0907776 | 1.43674    | -0.140071   | BGIOSGA017940 | XP_006645017.1 phosphatidylinositol:ceramide inositolphosphotransferase                               |
| TCONS_00022886 | 0.0907957 | 1.09727    | 0.0841529   | BGIOSGA023585 | XP_002438989.1 tarogenate dehydrogenase 2, chloroplastic                                              |
| TCONS_00004538 | 0.0908026 | 0.449142   | 0.76534     | BGIOSGA011244 | XP_006644826.1 disease resistance protein RPS2-like                                                   |
| TCONS_00021296 | 0.0910868 | -0.183158  | -0.159654   | BGIOSGA020067 | XP_006656418.1 nifU-like protein 3, chloroplastic                                                     |
| TCONS_00010019 | 0.0911133 | 0.899136   | 0.317331    | BGIOSGA036761 | XP_006650048.1 vacuolar-sorting receptor 1-like                                                       |
| TCONS_00029536 | 0.0911619 | 0.998439   | -0.0162912  | BGIOSGA031294 | XP_006661565.2 R3H domain-containing protein 1-like                                                   |
| TCONS_00023119 | 0.0913369 | -0.299481  | -0.503637   | BGIOSGA024575 | XP_006658281.2 40S ribosomal protein S12                                                              |
| TCONS_00033325 | 0.0914407 | 0.950913   | 0.745058    | BGIOSGA035155 | XP_006664857.1 mediator of RNA polymerase II transcription subunit 15-like                            |
| TCONS_00004297 | 0.0915254 | -0.0140813 | -0.149969   | BGIOSGA000911 | XP_006644623.1 probable choline kinase 2 isoform X1                                                   |
| TCONS_00015932 | 0.0915439 | -0.347459  | 0.623357    | BGIOSGA015053 | XP_008662249.1 OSJNBa0006B20.20-like protein isoform X1                                               |
| TCONS_00023989 | 0.0915531 | -1.13452   | -0.108864   | BGIOSGA012031 | XP_006657890.1 putative yippee-like protein Os10g0369500                                              |
| TCONS_00034380 | 0.0917271 | 0.36887    | 0.723813    | BGIOSGA036558 | XP_015698755.1 V-type proton ATPase 16 kDa proteolipid subunit-like                                   |
| TCONS_00025205 | 0.0918256 | 0.570448   | 0.290103    | BGIOSGA030818 | XP_015694654.1 phospholipase A I                                                                      |
| TCONS_00008226 | 0.0918793 | 0.804035   | -0.300574   | BGIOSGA028831 | XP_015689153.1 E3 ubiquitin-protein ligase RING1-like                                                 |
| TCONS_00021974 | 0.0918968 | -3.34932   | -1.83457    | BGIOSGA016278 | XP_015694446.1 endoglucanase 16 isoform X3                                                            |
| TCONS_00015131 | 0.092148  | 0.256566   | 0.626557    | BGIOSGA017310 | XP_008661409.1 uncharacterized                                                                        |
| TCONS_00016466 | 0.0922358 | 0.858913   | -0.449653   | BGIOSGA005839 | LOC100193333 isoform X1                                                                               |
| TCONS_00018864 | 0.0922912 | -0.0364712 | -0.0689439  | BGIOSGA018554 | XP_006652686.1 scarecrow-like protein 8                                                               |
| TCONS_00015762 | 0.0924943 | 0.00483786 | -0.0997988  | BGIOSGA000237 | XP_006655109.1 DNA (cytosine-5)-methyltransferase 1-like                                              |
| TCONS_00027879 | 0.0928405 | 0.088896   | -0.338908   | #N/A          | XP_006652203.1 stearyl-[acyl-carrier-protein] 9-desaturase 5, chloroplastic                           |
| TCONS_00014374 | 0.0929592 | -0.537445  | -0.772156   | BGIOSGA032833 | #N/A                                                                                                  |
| TCONS_00003215 | 0.0929861 | #N/A       | 0.23183     | BGIOSGA002003 | NP_001150220.1 wound/stress protein precursor                                                         |
| TCONS_00014320 | 0.0930728 | -0.357986  | -0.170413   | BGIOSGA008513 | XP_006643989.2 receptor-like serine/threonine-protein kinase At1g78530                                |
| TCONS_00013426 | 0.0931619 | -0.78694   | -0.533208   | BGIOSGA005285 | XP_002447913.1 trihelix transcription factor ASIL2                                                    |
| TCONS_00015760 | 0.0931734 | -0.291794  | 0.0943079   | BGIOSGA023009 | XP_004981265.1 protein SODIUM POTASSIUM ROOT DEFECTIVE 2                                              |
| TCONS_00027665 | 0.0931966 | 0.802372   | 0.218099    | BGIOSGA027346 | XP_021308940.1 uncharacterized protein LOC8054862                                                     |
| TCONS_00019102 | 0.0932498 | 0.2851     | 0.144643    | BGIOSGA009563 | XP_003573618.1 uncharacterized protein LOC100831568                                                   |
| TCONS_00020755 | 0.0934484 | 0.565236   | 1.35512     | BGIOSGA007658 | XP_008649553.1 CASP-like protein 4B4                                                                  |
| TCONS_00023456 | 0.093475  | -0.0642134 | -0.450066   | BGIOSGA016259 | XP_002453821.1 F-box/LRR-repeat protein 13                                                            |
| TCONS_00018289 | 0.0935266 | 0.476994   | 0.045139    | BGIOSGA027620 | XP_006658457.1 PREDICTED: uncharacterized protein LOC102699882                                        |
| TCONS_00007108 | 0.093546  | 0.430121   | 0.179889    | BGIOSGA005422 | XP_006662577.1 branched-chain-amino-acid aminotransferase 5, chloroplastic-like                       |
| TCONS_00018137 | 0.093595  | -0.0190603 | 0.600784    | BGIOSGA030715 | XP_006648113.2 NADH dehydrogenase [ubiquinone] 1 alpha subcomplex subunit 9, mitochondrial isoform X1 |
| TCONS_00010616 | 0.093723  | -0.0840582 | 0.631485    | BGIOSGA013239 | XP_015693179.1 probable alpha, alpha-trehalose-phosphate synthase [UDP-forming] 7                     |
| TCONS_00015241 | 0.0937678 | 1.2616     | 1.01213     | BGIOSGA015739 | XP_006650366.1 3-isopropylmalate dehydrogenase 2, chloroplastic-like                                  |
| TCONS_00014353 | 0.0938222 | -0.159943  | 0.31608     | BGIOSGA016513 | XP_015692082.1 eukaryotic translation initiation factor 3 subunit M-like                              |
| TCONS_00021985 | 0.0938222 | -0.822908  | 0.24208     | BGIOSGA031855 | XP_015692398.1 PREDICTED: uncharacterized protein LOC102715387 isoform X2                             |
| TCONS_00001576 | 0.0938407 | -0.221612  | -0.00910444 | BGIOSGA004208 | XP_015693906.1 BTB/POZ and MATH domain-containing protein 1-like                                      |
| TCONS_00021797 | 0.0938473 | 0.277854   | 1.4416      | BGIOSGA029856 | XP_006644524.1 PREDICTED: uncharacterized protein LOC102708567                                        |
| TCONS_00016263 | 0.0938578 | 0.505564   | -0.235723   | BGIOSGA005283 | XP_015693484.1 pentatricopeptide repeat-containing protein At3g18110, chloroplastic                   |
| TCONS_00006039 | 0.0938816 | -1.14975   | -0.258489   | BGIOSGA021450 | XP_015692254.1 myb-related protein Myb4-like                                                          |
| TCONS_00016332 | 0.0939979 | 0.761834   | 0.578679    | BGIOSGA002861 | XP_006656881.1 DNA topoisomerase 1                                                                    |
| TCONS_00036701 | 0.0940753 | 0.536859   | 0.473473    | BGIOSGA006048 | XP_006652593.1 probable receptor-like protein kinase At1g33260                                        |
| TCONS_00002903 | 0.0944989 | -1.03153   | 0.303283    | BGIOSGA008656 | XP_006663828.1 UDP-galactose transporter 2-like                                                       |
| TCONS_00009564 | 0.0945174 | -0.293483  | 0.345666    | BGIOSGA029476 | XP_006643793.1 uncharacterized membrane protein At1g06890                                             |
| TCONS_00036707 | 0.0945455 | -1.65849   | -0.861851   | BGIOSGA008181 | XP_015689815.1 probable inactive purple acid phosphatase 1                                            |
| TCONS_00008883 | 0.0945491 | 1.00534    | 1.49721     | BGIOSGA028623 | XP_006663830.1 rho GTPase-activating protein 4-like                                                   |
| TCONS_00016133 | 0.0945646 | 0.618366   | 0.249678    | BGIOSGA027403 | XP_006665059.1 mediator-associated protein 1-like                                                     |
| TCONS_00014629 | 0.0946341 | 0.497998   | 0.799494    | BGIOSGA022587 | XP_006652433.1 F-box protein SKIP14                                                                   |
| TCONS_00019558 | 0.0946391 | -3.48923   | #N/A        | BGIOSGA017800 | XP_004976282.1 protein RETICULATA-RELATED 1, chloroplastic                                            |
| TCONS_00035175 | 0.0949137 | 0.318676   | 0.997071    | BGIOSGA011471 | XP_006655447.2 eukaryotic translation initiation factor 3 subunit J-like                              |
|                |           |            |             |               | XP_006663044.1 SEC12-like protein 2                                                                   |

transcriptome

|                |           |            |            |               |                                                                                             |
|----------------|-----------|------------|------------|---------------|---------------------------------------------------------------------------------------------|
| TCONS_00002758 | 0.0949282 | 0.134536   | 0.848181   | BGIOSGA002458 | XP_015692812.1PREDICTED: uncharacterized protein LOC102704932                               |
| TCONS_00021429 | 0.0949347 | -0.157655  | -0.377218  | BGIOSGA023652 | XP_006644463.1 coiled-coil domain-containing protein 12-like                                |
| TCONS_00031592 | 0.094992  | 0.0696019  | 0.136239   | BGIOSGA024578 | XP_006662028.1 mediator of RNA polymerase II transcription subunit 32                       |
| TCONS_00015754 | 0.0950955 | -0.348043  | 0.50644    | BGIOSGA015225 | XP_006652199.1 dnaJ homolog subfamily C member 2                                            |
| TCONS_00016015 | 0.0951442 | -0.184538  | 0.267655   | BGIOSGA035171 | XP_006652371.1 probable ran guanine nucleotide release factor                               |
| TCONS_00026014 | 0.0953198 | -0.108398  | 0.533095   | BGIOSGA025888 | XP_006659889.1 vacuolar protein sorting-associated protein 18 homolog                       |
| TCONS_00019331 | 0.0953664 | 0.474673   | 0.387784   | BGIOSGA004910 | XP_015693038.1 cleavage stimulation factor subunit 2 tau variant isoform X2                 |
| TCONS_00021718 | 0.0954598 | -1.088     | 0.238022   | BGIOSGA013442 | XP_003561022.2probable glycosyltransferase At5g25310                                        |
| TCONS_00022239 | 0.0954998 | -0.334272  | -0.141576  | BGIOSGA021260 | XP_006656085.1 probable WRKY transcription factor 19                                        |
| TCONS_00012974 | 0.0955621 | 0.443633   | 0.198618   | BGIOSGA029486 | XP_015691103.1 scarecrow-like protein 9                                                     |
| TCONS_00034126 | 0.0957364 | 1.89811    | -1.8222    | BGIOSGA034644 | XP_006662652.1 ferritin-1, chloroplastic-like                                               |
| TCONS_00024258 | 0.0957598 | -0.0959373 | -0.111859  | BGIOSGA026296 | XP_006658053.2 TVP38/TMEM64 family membrane protein slr0305                                 |
| TCONS_00004674 | 0.0958658 | -3.9954    | -0.788516  | BGIOSGA000798 | XP_014755194.1interactor of constitutive active ROPs 2, chloroplastic isoform X2            |
| TCONS_00029813 | 0.0958658 | -2.60309   | -1.20355   | BGIOSGA030006 | XP_004956563.1glutathione S-transferase T3                                                  |
| TCONS_00009506 | 0.0958715 | -1.77965   | -0.938079  | BGIOSGA030677 | XP_006649573.1PREDICTED: uncharacterized protein LOC102705987                               |
| TCONS_00015353 | 0.0959406 | 0.200904   | -0.244988  | BGIOSGA020873 | XP_006652098.1 protein YIF1B-like                                                           |
| TCONS_00027383 | 0.0960172 | 0.128528   | -0.966888  | BGIOSGA027621 | NP_001140781.1putative FAD-binding Berberine family protein precursor                       |
| TCONS_00005125 | 0.0962044 | 0.00262044 | 0.138492   | BGIOSGA000079 | NP_001105732.1chloroplast srp54 receptor 1                                                  |
| TCONS_00020219 | 0.0963381 | 0.120972   | 0.419193   | BGIOSGA022410 | XP_006655845.1 cystathionine beta-lyase, chloroplastic                                      |
| TCONS_00004890 | 0.0964162 | -0.85521   | -0.939651  | BGIOSGA000331 | XP_004970893.1uncharacterized protein LOC101764087                                          |
| TCONS_00027647 | 0.0964927 | -1.2413    | -1.2051    | BGIOSGA027367 | XP_006659248.1 probable receptor-like serine/threonine-protein kinase At5g57670             |
| TCONS_00018657 | 0.0965    | 1.33082    | 0.0810513  | BGIOSGA003166 | XP_006655009.1 importin subunit alpha-1b                                                    |
| TCONS_00005232 | 0.0965808 | -0.0235837 | -0.264982  | BGIOSGA022106 | XP_006648210.2 BAG family molecular chaperone regulator 7                                   |
| TCONS_00006327 | 0.0967889 | 0.123      | 0.0576745  | BGIOSGA008491 | XP_002452338.1uncharacterized endoplasmic reticulum membrane protein YGL010W                |
| TCONS_00025753 | 0.0970492 | 0.301948   | 0.277083   | BGIOSGA023242 | XP_006658170.1 26S protease regulatory subunit 4 homolog                                    |
| TCONS_00016237 | 0.0970647 | -0.469604  | 0.50555    | BGIOSGA014737 | XP_006653593.1PREDICTED: uncharacterized protein LOC102706841                               |
| TCONS_00028247 | 0.0971603 | 0.649349   | 0.561001   | BGIOSGA037824 | XP_003574712.1COP9 signalosome complex subunit 6a                                           |
| TCONS_00014559 | 0.0971923 | 0.306149   | 0.696031   | BGIOSGA005392 | XP_006652482.1 calmodulin-binding receptor-like cytoplasmic kinase 3                        |
| TCONS_00011661 | 0.0973107 | -1.39886   | -2.57288   | BGIOSGA010821 | XP_015689784.1PREDICTED: uncharacterized protein LOC102702269, partial                      |
| TCONS_00018312 | 0.0973479 | -0.0423458 | 0.471379   | BGIOSGA001057 | XP_022680692.1probable E3 ubiquitin-protein ligase ZFP1                                     |
| TCONS_00009658 | 0.0973938 | 0.266109   | 0.419936   | BGIOSGA014375 | XP_006649705.1 protein OBERON 3-like                                                        |
| TCONS_00008680 | 0.0973975 | 0.606224   | 0.378271   | BGIOSGA005750 | XP_006647787.2 protease Do-like 7 isoform X1                                                |
| TCONS_00036391 | 0.0974143 | -0.0934107 | 0.680104   | BGIOSGA012214 | XP_015698360.1 probable ubiquitin-like-specific protease 2B                                 |
| TCONS_00021967 | 0.097453  | 0.721475   | 0.766167   | BGIOSGA021549 | XP_006655961.2 alpha-mannosidase 2                                                          |
| TCONS_00012646 | 0.0975017 | 0.975258   | 0.85092    | BGIOSGA010327 | XP_006651579.2 DUF21 domain-containing protein At1g55930, chloroplastic-like                |
| TCONS_00018837 | 0.0975508 | -5.32243   | -3.00933   | BGIOSGA002110 | XP_006654158.1 bidirectional sugar transporter SWEET3a                                      |
| TCONS_00037517 | 0.0976279 | -0.422895  | -0.734744  | BGIOSGA035848 | XP_006664187.1 WPP domain-associated protein-like isoform X1                                |
| TCONS_00035891 | 0.0976896 | -0.168065  | 0.439241   | BGIOSGA037264 | XP_006663956.1 WD repeat-containing protein 89 homolog isoform X1                           |
| TCONS_00020056 | 0.097724  | 0.592055   | 0.63555    | BGIOSGA022238 | XP_006656599.1 protein DECREASED SIZE EXCLUSION LIMIT 1                                     |
| TCONS_00021273 | 0.0977809 | -0.615548  | -0.823161  | BGIOSGA022635 | XP_002437483.1protein IRX15-LIKE                                                            |
| TCONS_00003988 | 0.0981735 | 0.657409   | 1.31897    | BGIOSGA017537 | XP_006644371.1 CTP synthase-like                                                            |
| TCONS_00003298 | 0.098216  | -1.19716   | -0.183703  | BGIOSGA032060 | XP_006644043.1 glutamate--tRNA ligase, cytoplasmic-like                                     |
| TCONS_00014691 | 0.098278  | 0.699668   | -0.173873  | BGIOSGA025432 | XP_006652598.1 glutamate dehydrogenase A-like                                               |
| TCONS_00024986 | 0.0983017 | -1.32828   | -0.3517    | BGIOSGA024409 | XP_006657637.1PREDICTED: uncharacterized protein LOC102713833 isoform X3                    |
| TCONS_00004615 | 0.0983647 | -0.568311  | -0.295106  | BGIOSGA003893 | XP_006644897.1 NADH--cytochrome b5 reductase 1                                              |
| TCONS_00007094 | 0.0983751 | -0.958823  | -0.175789  | BGIOSGA005145 | XP_006648098.1 cytochrome c1 2, heme protein, mitochondrial-like isoform X1                 |
| TCONS_00034132 | 0.0987519 | -0.32265   | 1.28147    | BGIOSGA015908 | XP_006663720.1PREDICTED: uncharacterized protein LOC102720754                               |
| TCONS_00034978 | 0.0989867 | -3.59074   | -1.73475   | BGIOSGA032589 | XP_006662967.1 chalcone synthase 1                                                          |
| TCONS_00030546 | 0.0990875 | 1.7492     | 0.474408   | BGIOSGA030272 | XP_015696457.1 28 kDa ribonucleoprotein, chloroplastic-like                                 |
| TCONS_00033382 | 0.0992482 | 0.936891   | 1.67146    | BGIOSGA017670 | XP_002458100.1pentatricopeptide repeat-containing protein At3g49240                         |
| TCONS_00002273 | 0.099287  | -0.729946  | -0.0473466 | BGIOSGA015756 | XP_021313085.1phytolongin Phyl1.1                                                           |
| TCONS_00033245 | 0.0993656 | 0.152455   | 0.765797   | BGIOSGA025013 | XP_006662858.1 probably inactive leucine-rich repeat receptor-like protein kinase At5g48380 |
| TCONS_00030900 | 0.0994077 | 0.549138   | 0.398694   | BGIOSGA032704 | XP_006644149.1 mevalonate kinase                                                            |
| TCONS_00020093 | 0.099451  | -0.806093  | -0.698616  | BGIOSGA004551 | XP_022685112.1uncharacterized protein LOC101754700 isoform X1                               |
| TCONS_00019633 | 0.0995014 | -2.98655   | -0.356009  | BGIOSGA016471 | XP_006654650.1 ras-related protein RIC2-like                                                |

## transcriptome

|                |           |            |            |               |                                                                                                   |
|----------------|-----------|------------|------------|---------------|---------------------------------------------------------------------------------------------------|
| TCONS_00009378 | 0.0995263 | 0.657525   | 0.347757   | BGIOSGA011928 | XP_006651066.1 2-dehydro-3-deoxygluconokinase                                                     |
| TCONS_00009925 | 0.0996316 | 0.411773   | 0.228067   | BGIOSGA037754 | XP_006647081.1 pentatricopeptide repeat-containing protein At3g06430, chloroplastic               |
| TCONS_00004205 | 0.099906  | 0.614805   | 0.0572943  | BGIOSGA029797 | XP_002278705.1 zinc finger protein BRUTUS isoform X1                                              |
| TCONS_00021653 | 0.10009   | 0.71301    | 0.293253   | BGIOSGA021867 | XP_006655815.1 rRNA-processing protein FCF1 homolog                                               |
| TCONS_00016605 | 0.100133  | -0.334242  | -0.214275  | BGIOSGA028186 | XP_006653762.1 UDP-N-acetylglucosamine diphosphorylase 2-like                                     |
| TCONS_00030050 | 0.100223  | 0.128158   | -1.52804   | BGIOSGA019646 | XP_003578125.1 WRKY transcription factor WRKY76                                                   |
| TCONS_00013639 | 0.100277  | 0.165086   | 0.746409   | BGIOSGA015794 | XP_006652078.1 amidase 1-like                                                                     |
| TCONS_00031462 | 0.100306  | -0.160885  | 0.989786   | BGIOSGA033279 | XP_006661958.2 electron transfer flavoprotein-ubiquinone oxidoreductase, mitochondrial isoform X1 |
| TCONS_00033160 | 0.101093  | #NA        | #NA        | BGIOSGA023267 | XP_004951581.1 TBCC domain-containing protein 1                                                   |
| TCONS_00009833 | 0.101115  | 0.464793   | 0.428456   | BGIOSGA012385 | XP_006649902.1 transmembrane protein 209                                                          |
| TCONS_00000656 | 0.10113   | 0.10955    | 0.191853   | BGIOSGA010870 | XP_003565639.1 BSD domain-containing protein 1                                                    |
| TCONS_00006707 | 0.101203  | -1.3788    | -1.4077    | BGIOSGA023422 | XP_006647740.1 myb family transcription factor APL-like                                           |
| TCONS_00029979 | 0.101257  | 0.380081   | 0.242238   | BGIOSGA029829 | XP_006660597.2 AUGMIN subunit 5                                                                   |
| TCONS_00027628 | 0.101261  | -0.237884  | -0.72063   | BGIOSGA027371 | XP_006659236.1 ACT domain-containing protein DS12, chloroplastic isoform X2                       |
| TCONS_00006858 | 0.101565  | -0.398611  | -0.0258749 | BGIOSGA021605 | XP_006647877.1 NEP1-interacting protein-like 2                                                    |
| TCONS_00021321 | 0.101641  | -0.913103  | -0.639256  | BGIOSGA017624 | XP_006657301.1 putative clathrin assembly protein At5g57200                                       |
| TCONS_00023281 | 0.101668  | 0.276166   | 1.08634    | BGIOSGA025326 | XP_006657528.1 basic proline-rich protein                                                         |
| TCONS_00010187 | 0.102195  | -0.0724966 | -0.292702  | BGIOSGA033474 | XP_006650137.1 probable methyltransferase PMT2                                                    |
| TCONS_00000316 | 0.102594  | 0.308391   | 0.461787   | BGIOSGA011243 | XP_006643831.2 PREDICTED: uncharacterized protein LOC102715339                                    |
| TCONS_00022234 | 0.102605  | -0.0460088 | -0.136527  | BGIOSGA021267 | XP_006656073.1 PREDICTED: uncharacterized protein LOC102716222                                    |
| TCONS_00000676 | 0.102656  | -0.649373  | -0.0387629 | BGIOSGA031307 | XP_015688222.1 probable anion transporter 1, chloroplastic                                        |
| TCONS_00031021 | 0.102706  | -0.652519  | 0.0416417  | BGIOSGA032833 | XP_006662311.2 PREDICTED: uncharacterized protein LOC102722149                                    |
| TCONS_00018460 | 0.102887  | 0.652087   | 1.13037    | BGIOSGA018975 | XP_006653944.1 eukaryotic translation initiation factor 3 subunit F                               |
| TCONS_00021416 | 0.103066  | 0.215013   | 0.414596   | BGIOSGA023642 | XP_015694182.1 epidermal growth factor receptor substrate 15-like 1 isoform X2                    |
| TCONS_00029544 | 0.10313   | 1.09998    | 0.625562   | BGIOSGA034902 | XP_006661001.1 U-box domain-containing protein 33-like                                            |
| TCONS_00023325 | 0.10316   | 2.20025    | 0.768094   | BGIOSGA025367 | XP_006657543.1 cytochrome b-c1 complex subunit 7-like                                             |
| TCONS_00026531 | 0.103246  | -0.123221  | 0.3001     | BGIOSGA028593 | XP_006659360.1 golgin candidate 4-like                                                            |
| TCONS_00014346 | 0.103405  | -0.262079  | -1.63839   | BGIOSGA016511 | XP_006652342.1 UPF0483 protein AGAP003155-like                                                    |
| TCONS_00023397 | 0.103407  | 0.399729   | 0.159169   | BGIOSGA025435 | XP_006658423.1 protein RETICULATA, chloroplastic-like                                             |
| TCONS_00007138 | 0.103476  | 0.598413   | -0.217343  | BGIOSGA031308 | XP_015689461.1 PREDICTED: LOW QUALITY PROTEIN: uncharacterized protein LOC102704866               |
| TCONS_00013214 | 0.103544  | 1.11256    | -0.84537   | BGIOSGA020074 | XP_006650630.1 probable protein phosphatase 2C 34                                                 |
| TCONS_00025598 | 0.103571  | 0.177776   | 0.417553   | BGIOSGA017475 | XP_002463267.1 calcium/calmodulin-dependent serine/threonine-protein kinase 1                     |
| TCONS_00026808 | 0.103776  | -0.0703507 | 0.670264   | BGIOSGA025331 | XP_015690776.1 carbon catabolite-derepressing protein kinase-like                                 |
| TCONS_00026992 | 0.103879  | 0.331924   | 1.18542    | BGIOSGA006714 | XP_015696172.1 uridine kinase-like protein 1, chloroplastic                                       |
| TCONS_00005734 | 0.103975  | 0.11329    | 0.682755   | BGIOSGA007850 | XP_006654147.1 60S ribosomal protein L11                                                          |
| TCONS_00034120 | 0.104034  | -1.56772   | -1.52481   | BGIOSGA027711 | XP_004961135.1 protein CHUP1, chloroplastic                                                       |
| TCONS_00022084 | 0.104069  | 0.698136   | 0.357612   | BGIOSGA025917 | XP_006656003.1 sister chromatid cohesion protein PDS5 homolog A                                   |
| TCONS_00016452 | 0.104263  | 0.25422    | 0.346169   | BGIOSGA022225 | XP_003580353.1 probable methyltransferase PMT15                                                   |
| TCONS_00011220 | 0.104325  | 0.689174   | 1.16444    | BGIOSGA013823 | XP_003563748.1 protein FLC EXPRESSOR                                                              |
| TCONS_00032672 | 0.104398  | 0.503145   | -0.648507  | BGIOSGA023704 | XP_006662038.1 probable trehalose-phosphate phosphatase 2                                         |
| TCONS_00003294 | 0.104568  | -0.770565  | -0.551527  | BGIOSGA001919 | XP_015692735.1 actin-related protein 6                                                            |
| TCONS_00004451 | 0.104935  | 0.115909   | -0.697068  | BGIOSGA008683 | XP_004970055.1 transcription factor PCF5                                                          |
| TCONS_00028887 | 0.104984  | 0.872774   | 0.0938802  | BGIOSGA007204 | XP_006659387.1 hexuronate transporter                                                             |
| TCONS_00027437 | 0.105184  | -2.29677   | -1.80225   | BGIOSGA017213 | XP_003573421.1 uncharacterized protein LOC100823080                                               |
| TCONS_00016706 | 0.105294  | -1.01097   | -0.592224  | BGIOSGA014258 | XP_015691839.1 putative E3 ubiquitin-protein ligase RING1a isoform X2                             |
| TCONS_00011163 | 0.10531   | 0.329509   | -0.308513  | BGIOSGA035823 | XP_004981369.1 serine/threonine-protein phosphatase PP2A-2 catalytic subunit                      |
| TCONS_00036078 | 0.105531  | -0.903222  | -0.113589  | BGIOSGA037442 | XP_006664044.1 nitrilase-like protein 2                                                           |
| TCONS_00029638 | 0.105622  | 0.240053   | -0.255169  | BGIOSGA029878 | XP_015696827.1 serine/threonine-protein kinase 16-like isoform X1                                 |
| TCONS_00003188 | 0.105649  | -0.506092  | -0.2112    | BGIOSGA002028 | XP_006643982.1 D-tyrosyl-tRNA(Tyr) deacylase                                                      |
| TCONS_00024620 | 0.105815  | -0.266508  | -0.206678  | BGIOSGA024766 | XP_006657473.1 syntaxin-132                                                                       |
| TCONS_00030718 | 0.105819  | -1.29432   | 0.495441   | BGIOSGA018480 | XP_015689722.1 PREDICTED: uncharacterized protein LOC107303725 isoform X2                         |
| TCONS_00020519 | 0.105857  | 0.0710427  | -0.0811658 | BGIOSGA023592 | XP_015694339.1 kanadaplin                                                                         |
| TCONS_00012168 | 0.105898  | 0.126524   | 0.265663   | BGIOSGA014979 | XP_008643716.1 uncharacterized protein LOC100382001 isoform X1                                    |
| TCONS_00023754 | 0.1059    | -0.813688  | 0.347665   | BGIOSGA024780 | XP_006657762.1 calcium-dependent protein kinase isoform 2                                         |
| TCONS_00030508 | 0.106378  | -0.745997  | -1.54499   | BGIOSGA022286 | NP_001148281.2 PRL1-interacting factor A                                                          |

transcriptome

|                |          |             |            |               |                                                                                                                     |
|----------------|----------|-------------|------------|---------------|---------------------------------------------------------------------------------------------------------------------|
| TCONS_00016053 | 0.106396 | -0.00717554 | 0.153008   | BGIOSGA014924 | XP_006653504.1 poly(A)-specific ribonuclease PARN                                                                   |
| TCONS_00013305 | 0.10642  | 0.553032    | -0.260257  | BGIOSGA024778 | XP_010228727.1 myosin-binding protein 7                                                                             |
| TCONS_00002464 | 0.106422 | -0.464231   | -0.19023   | BGIOSGA019719 | XP_006646644.1 beta-glucosidase 5-like                                                                              |
| TCONS_00010819 | 0.106517 | -0.167629   | 0.24079    | BGIOSGA004209 | XP_006651745.1 dynamin-related protein 1C<br>XP_002452968.1 probable steroid-binding protein 3                      |
| TCONS_00007013 | 0.106912 | -1.23825    | -1.2088    | BGIOSGA009195 | XP_015691605.1 molybdopterin biosynthesis protein CNX1                                                              |
| TCONS_00015118 | 0.107199 | 1.28449     | 2.77747    | BGIOSGA017297 | XP_015698033.1 transcription factor VIP1-like                                                                       |
| TCONS_00033017 | 0.107199 | #NA         | #NA        | BGIOSGA037037 | #NA                                                                                                                 |
| TCONS_00017135 | 0.107199 | -0.300475   | #NA        | #NA           | #NA                                                                                                                 |
| TCONS_00007349 | 0.107386 | -0.44313    | -0.549131  | BGIOSGA017551 | XP_015689349.1 mitogen-activated protein kinase 3                                                                   |
| TCONS_00021377 | 0.107434 | 0.456599    | -0.0364855 | BGIOSGA029015 | XP_006656491.1 translocon-associated protein subunit alpha                                                          |
| TCONS_00016818 | 0.107524 | 0.485526    | 1.23353    | BGIOSGA014146 | XP_006653858.1 N-acylphosphatidylethanolamine synthase<br>XP_002437266.1 subtilisin-like protease SBT5.3 isoform X2 |
| TCONS_00021018 | 0.107682 | 0.0536782   | -0.39384   | BGIOSGA028236 | XP_015689702.1 GPN-loop GTPase 1                                                                                    |
| TCONS_00009938 | 0.108131 | 0.659877    | 0.859664   | BGIOSGA007567 | XP_006663091.1 palmitoyl-acyl carrier protein thioesterase, chloroplastic-like                                      |
| TCONS_00008481 | 0.10822  | -0.420009   | 0.158953   | BGIOSGA023195 | XP_008658694.1 tac7077 isoform X1                                                                                   |
| TCONS_00020270 | 0.108401 | 0.415257    | -1.48693   | BGIOSGA022461 | XP_002459121.1 U-box domain-containing protein 14                                                                   |
| TCONS_00005120 | 0.108425 | 0.0452775   | -0.793092  | BGIOSGA000083 |                                                                                                                     |
| TCONS_00001655 | 0.108466 | -0.261237   | -0.3726    | BGIOSGA028930 | XP_006646251.1 chloride channel CLC-e<br>XP_006651450.1 probable ribosomal protein S11, mitochondrial               |
| TCONS_00012370 | 0.108581 | 0.267943    | 1.23808    | BGIOSGA037982 | XP_006656441.1 PREDICTED: uncharacterized protein LOC102705923                                                      |
| TCONS_00022854 | 0.108596 | 0.000295753 | -0.227047  | BGIOSGA007653 | XP_015698319.1 bifunctional 3-dehydroquinate dehydratase/shikimate dehydrogenase, chloroplastic-like                |
| TCONS_00037299 | 0.108869 | -0.519307   | -0.286236  | BGIOSGA014525 | XP_006654504.1 aldo-keto reductase family 4 member C10-like                                                         |
| TCONS_00019426 | 0.108929 | #NA         | -1.83874   | BGIOSGA032431 | XP_015689591.1 PREDICTED: uncharacterized protein LOC102716758                                                      |
| TCONS_00007401 | 0.109135 | 0.537602    | 0.040721   | BGIOSGA023459 | XP_006657507.2 transcription factor UNE12-like                                                                      |
| TCONS_00023224 | 0.109483 | 0.518074    | 0.734848   | BGIOSGA031055 | XP_006653586.1 2-phytyl-1,4-beta-naphthoquinone methyltransferase, chloroplastic isoform X1                         |
| TCONS_00016220 | 0.109526 | -2.00813    | -0.133619  | BGIOSGA014753 | XP_015697758.1 TBC1 domain family member 13-like                                                                    |
| TCONS_00033459 | 0.109569 | 0.807707    | -0.302641  | BGIOSGA000293 | XP_015691665.1 WD repeat-containing protein 44-like                                                                 |
| TCONS_00015869 | 0.109579 | -0.0135353  | 0.220672   | BGIOSGA006296 | XP_004951978.1 proteasome subunit alpha type-1                                                                      |
| TCONS_00005361 | 0.109647 | 1.0305      | 0.330359   | BGIOSGA020334 | XP_002452493.1 uncharacterized protein LOC8066188                                                                   |
| TCONS_00006509 | 0.109676 | 0.973473    | 0.164875   | BGIOSGA008619 | XP_015689916.1 cystathionine gamma-synthase 1, chloroplastic-like                                                   |
| TCONS_00012346 | 0.110086 | -0.769941   | -0.112994  | BGIOSGA010643 | XP_015692368.1 cysteine protease ATG4B-like                                                                         |
| TCONS_00016891 | 0.110305 | -0.328242   | -0.570079  | BGIOSGA005526 | XP_002465541.1 disease resistance protein RPS2                                                                      |
| TCONS_00036847 | 0.110305 | -0.409602   | -0.169722  | BGIOSGA036466 | XP_006661845.2 pre-mRNA-processing factor 19                                                                        |
| TCONS_00032392 | 0.110404 | 0.666581    | 0.670514   | BGIOSGA017029 | XP_002436975.1 galactan beta-1,4-galactosyltransferase GALS1                                                        |
| TCONS_00020634 | 0.110483 | -1.33583    | -2.25763   | BGIOSGA034133 | XP_006654053.1 double-stranded RNA-binding protein 2-like                                                           |
| TCONS_00018640 | 0.110488 | -0.204573   | -0.0820175 | BGIOSGA018794 | XP_006647076.1 tetraspanin-2-like                                                                                   |
| TCONS_00005679 | 0.110609 | 0.295502    | -0.192711  | BGIOSGA019086 | XP_024310550.1 putative disease resistance protein RGA4 isoform X1                                                  |
| TCONS_00033026 | 0.110657 | 0.751419    | -0.128773  | BGIOSGA034451 | XP_022683178.1 pectinesterase inhibitor 28-like                                                                     |
| TCONS_00027218 | 0.11106  | -1.33383    | -0.296999  | BGIOSGA006850 | XP_006661559.1 PREDICTED: uncharacterized protein LOC102715790                                                      |
| TCONS_00030554 | 0.111116 | 0.699003    | -0.799759  | BGIOSGA012068 | XP_015697330.1 PREDICTED: uncharacterized protein LOC102709312 isoform X3                                           |
| TCONS_00032696 | 0.111117 | 0.401134    | -0.110556  | BGIOSGA031412 | XP_015697795.1 PREDICTED: uncharacterized protein LOC102706976 isoform X1                                           |
| TCONS_00031947 | 0.111128 | 0.406463    | -0.829548  | BGIOSGA005188 | XP_015693948.1 (R)-mandelonitrile lyase-like                                                                        |
| TCONS_00014539 | 0.111149 | -0.307524   | #NA        | BGIOSGA004432 | XP_004964501.1 uncharacterized protein LOC101784438                                                                 |
| TCONS_00021579 | 0.111149 | #NA         | -2.40249   | BGIOSGA011798 | XP_006651374.1 nuclear pore complex protein NUP93A-like                                                             |
| TCONS_00012268 | 0.111172 | 0.773518    | 0.31848    | BGIOSGA011790 | XP_015690191.1 bifunctional epoxide hydrolase 2-like                                                                |
| TCONS_00013468 | 0.111215 | 0.0274776   | 0.669873   | BGIOSGA033212 | XP_006648278.1 protein TRI1-like                                                                                    |
| TCONS_00007287 | 0.111393 | 0.868305    | 0.589481   | BGIOSGA007195 | NP_001148673.1 ribosomal protein L32 containing protein                                                             |
| TCONS_00009393 | 0.111418 | -0.426245   | -2.03848   | BGIOSGA031945 | XP_006659618.1 PREDICTED: uncharacterized protein LOC102699889                                                      |
| TCONS_00028372 | 0.111424 | 1.66299     | 1.26361    | BGIOSGA026591 | XP_015688987.1 calcium sensing receptor, chloroplastic                                                              |
| TCONS_00008745 | 0.111594 | -2.70827    | -2.23316   | BGIOSGA005687 | XP_006652226.1 poly(A) polymerase I-like                                                                            |
| TCONS_00015801 | 0.111687 | 0.223679    | 0.696641   | BGIOSGA015183 | XP_004982996.1 rubisco accumulation factor 1, chloroplastic-like                                                    |
| TCONS_00032313 | 0.111697 | 1.58526     | 0.821118   | BGIOSGA006963 | XP_006650091.1 probable diphthine methyl ester synthase                                                             |
| TCONS_00012283 | 0.111713 | 0.820626    | 0.137458   | BGIOSGA010722 |                                                                                                                     |
| TCONS_00020336 | 0.111734 | 0.668267    | 0.0639869  | BGIOSGA026688 | XP_015693818.1 aminoacylase-1-like isoform X1                                                                       |
| TCONS_00029407 | 0.111802 | 0.0954777   | -0.0909579 | BGIOSGA019674 | NP_001169272.1 ARO1-like protein 2                                                                                  |
| TCONS_00023913 | 0.111854 | -0.245426   | 0.132347   | BGIOSGA000699 | XP_015694822.1 sphingosine kinase 1-like                                                                            |



## transcriptome

|                |          |            |            |               |                                                                                           |
|----------------|----------|------------|------------|---------------|-------------------------------------------------------------------------------------------|
| TCONS_00018474 | 0.111917 | -1.05085   | -0.65419   | BGIOSGA005243 | XP_006653954.1 ABC transporter D family member 1                                          |
| TCONS_00000364 | 0.11206  | -0.852378  | -0.561079  | BGIOSGA013293 | XP_008655733.1 putative transcription factor bHLH041                                      |
| TCONS_00008611 | 0.112106 | 0.840414   | 0.176118   | BGIOSGA004883 | XP_006647706.1 phosphatidylinositol glycan anchor biosynthesis class U protein-like       |
| TCONS_00030421 | 0.112206 | -1.9133    | 0.0592892  | BGIOSGA034841 | XP_006660883.1 two-component response regulator-like PRR95                                |
| TCONS_00036184 | 0.112232 | -0.0398527 | -1.21749   | BGIOSGA001788 | XP_004957251.1 probable sarcosine oxidase                                                 |
| TCONS_00027079 | 0.112291 | 1.40786    | 1.24442    | BGIOSGA009379 | XP_006659664.1 proteasome subunit alpha type-7-A                                          |
| TCONS_00039844 | 0.112533 | -0.987765  | 0.312276   | BGIOSGA031206 | XP_004976668.1 phosphoribulokinase, chloroplastic                                         |
| TCONS_00000279 | 0.112644 | 0.477324   | -0.610863  | BGIOSGA019249 | XP_015698988.1 autophagy-related protein 18d-like isoform X2                              |
| TCONS_00001470 | 0.112679 | 0.410071   | 0.621218   | BGIOSGA004733 | XP_006644438.1 malate dehydrogenase, mitochondrial-like                                   |
| TCONS_00005569 | 0.112787 | 0.133771   | 0.306547   | BGIOSGA028425 | XP_006646988.1 probable sucrose-phosphate synthase 2                                      |
| TCONS_00020363 | 0.11279  | -3.39387   | -1.20765   | BGIOSGA005920 | XP_006655916.1 blue copper protein-like                                                   |
| TCONS_00031684 | 0.112838 | 1.09169    | 0.551492   | BGIOSGA033502 | XP_015697455.1 glycerol-3-phosphate acyltransferase, chloroplastic                        |
| TCONS_00018836 | 0.112858 | 0.567724   | -0.447853  | #N/A          | #N/A                                                                                      |
| TCONS_00008689 | 0.112868 | -0.684105  | 0.759197   | BGIOSGA028505 | XP_006648988.1 pyrophosphate-fructose 6-phosphate 1-phosphotransferase subunit alpha-like |
| TCONS_00017281 | 0.112868 | 0.0972543  | 0.118526   | BGIOSGA030717 | XP_015692509.1 diacylglycerol O-acyltransferase 1-like                                    |
| TCONS_00004313 | 0.112888 | -0.419128  | -0.759272  | BGIOSGA014966 | XP_006644646.1 putative ABC transporter B family member 8                                 |
| TCONS_00002170 | 0.113007 | 0.750447   | -0.166972  | BGIOSGA030289 | XP_015699217.1 PREDICTED: uncharacterized protein LOC102710642 isoform X3                 |
| TCONS_00023926 | 0.11306  | 0.274109   | 1.1776     | BGIOSGA003645 | XP_015693233.1 probable manganese-transporting ATPase PDR2                                |
| TCONS_00033631 | 0.11307  | 0.537829   | 0.329567   | BGIOSGA013429 | XP_006662988.1 14-3-3-like protein GF14-D                                                 |
| TCONS_00020355 | 0.113273 | 0.87695    | -0.0705837 | BGIOSGA005572 | XP_015693499.1 PREDICTED: uncharacterized protein LOC102717445                            |
| TCONS_00000604 | 0.113287 | -0.137708  | 0.127781   | BGIOSGA019279 | XP_010230731.1 putative disease resistance protein RGA3                                   |
| TCONS_00005163 | 0.113317 | 1.30379    | 0.444439   | BGIOSGA006711 | XP_006646728.2 proteinaceous RNase P 2                                                    |
| TCONS_00021466 | 0.113335 | -2.79614   | 0.73911    | BGIOSGA026749 | XP_004964304.1 E3 ubiquitin-protein ligase RHA1B                                          |
| TCONS_00032467 | 0.11358  | 0.42385    | 1.05852    | BGIOSGA031653 | XP_014757242.1 DNA ligase 1                                                               |
| TCONS_00001314 | 0.113727 | 0.511215   | 0.619578   | BGIOSGA003947 | XP_015689221.1 PREDICTED: uncharacterized protein LOC102703543                            |
| TCONS_00023188 | 0.113752 | -0.620741  | -0.0608227 | BGIOSGA025229 | XP_006658317.1 folate-biopterin transporter 1, chloroplastic-like                         |
| TCONS_00006813 | 0.113795 | 0.532011   | -0.0887538 | BGIOSGA009273 | XP_006647846.1 3-ketoacyl-CoA synthase 5-like                                             |
| TCONS_00023625 | 0.113912 | 0.0600391  | -0.0880862 | BGIOSGA025649 | XP_015694623.1 acyl-coenzyme A thioesterase 13-like                                       |
| TCONS_00016026 | 0.11397  | 1.81072    | 1.29409    | BGIOSGA022794 | XP_002447973.1 prohibitin-3, mitochondrial                                                |
| TCONS_00005430 | 0.114075 | 0.368853   | 0.323526   | BGIOSGA010036 | XP_006646885.1 GATA transcription factor 17-like isoform X1                               |
| TCONS_00008950 | 0.114094 | 0.209525   | 0.443445   | BGIOSGA005457 | XP_006649120.1 autophagy-related protein 18b isoform X1                                   |
| TCONS_00002907 | 0.114188 | 0.0759748  | 0.192671   | BGIOSGA018735 | XP_015691467.1 protein NETWORKED 4B-like                                                  |
| TCONS_00038002 | 0.114307 | 0.0615637  | 1.23037    | BGIOSGA034459 | XP_006653448.1 chaperonin 60 subunit beta 4, chloroplastic-like                           |
| TCONS_00023619 | 0.114477 | 0.16762    | -0.338888  | BGIOSGA006305 | XP_021309522.1 ultraviolet-B receptor UVR8                                                |
| TCONS_00024980 | 0.114522 | -1.26801   | -1.03456   | BGIOSGA015744 | XP_006657631.1 PREDICTED: uncharacterized protein LOC102713007 isoform X3                 |
| TCONS_00007888 | 0.114597 | -0.0381145 | -0.537255  | BGIOSGA036403 | XP_006648597.1 ABC transporter G family member 40 isoform X1                              |
| TCONS_00011678 | 0.114805 | 0.485168   | 0.434656   | BGIOSGA011330 | XP_006649509.1 eukaryotic translation initiation factor 3 subunit K                       |
| TCONS_00032605 | 0.114846 | -1.24335   | -2.47252   | BGIOSGA031599 | XP_006661987.1 probable glutathione S-transferase GSTU6                                   |
| TCONS_00004342 | 0.114921 | -2.31407   | 0.494813   | BGIOSGA008289 | XP_015699162.1 mitochondrial import receptor subunit TOM7-1-like                          |
| TCONS_00022907 | 0.114921 | #N/A       | 1.17289    | BGIOSGA020536 | XP_003563567.1 uncharacterized protein LOC100837547                                       |
| TCONS_00034649 | 0.115308 | -0.231106  | 0.321737   | BGIOSGA034183 | XP_010237773.1 F-box protein SKIP16 isoform X1                                            |
| TCONS_00012238 | 0.115831 | -0.942269  | 0.514042   | BGIOSGA026380 | XP_006650060.1 60S ribosomal protein L18-3-like                                           |
| TCONS_00003103 | 0.116044 | 0.0325198  | -0.217297  | BGIOSGA002120 | XP_006643911.2 ABC transporter D family member 2, chloroplastic                           |
| TCONS_00016260 | 0.116049 | 0.0613456  | -0.0807655 | BGIOSGA006015 | XP_015688822.1 60S ribosomal protein L14-1-like                                           |
| TCONS_00011304 | 0.116065 | -1.51952   | 0.548784   | #N/A          | #N/A                                                                                      |
| TCONS_00010030 | 0.116099 | -0.546383  | -0.223093  | BGIOSGA010772 | XP_002467895.1 uroporphyrinogen decarboxylase                                             |
| TCONS_00030535 | 0.116152 | -0.423771  | -0.178167  | BGIOSGA029271 | XP_004957636.1 uncharacterized protein LOC101772363                                       |
| TCONS_00026009 | 0.11627  | -1.34168   | -0.511603  | BGIOSGA028561 | XP_002443946.2 putative disease resistance RPP13-like protein 3                           |
| TCONS_00011775 | 0.116379 | 0.556051   | -0.0607101 | BGIOSGA030881 | XP_015689812.1 glycine-rich cell wall structural protein 1.0-like                         |
| TCONS_00025743 | 0.116431 | 0.274251   | 0.560186   | BGIOSGA010148 | XP_006658168.1 lon protease homolog, mitochondrial                                        |
| TCONS_00003871 | 0.116562 | -0.942232  | -0.353821  | BGIOSGA001343 | NP_001183642.1 putative homeodomain-like transcription factor superfamily protein         |
| TCONS_00011642 | 0.1166   | -0.613987  | -1.33504   | BGIOSGA021515 | XP_004985544.1 uncharacterized protein LOC101768541                                       |

transcriptome

|                |          |              |             |               |                                                                                                                          |
|----------------|----------|--------------|-------------|---------------|--------------------------------------------------------------------------------------------------------------------------|
| TCONS_00034493 | 0.116602 | 1.26583      | 0.646081    | BGIOSGA034336 | XP_010100144.1Putative disease resistance RPP13-like protein 1                                                           |
| TCONS_00022145 | 0.116735 | -0.317182    | -0.831696   | #N/A          | #N/A                                                                                                                     |
| TCONS_00005555 | 0.116883 | 0.691236     | 0.45897     | BGIOSGA037467 | XP_003571019.3heptahelical transmembrane protein ADIPOR2 isoform X1                                                      |
| TCONS_00002040 | 0.117411 | -0.86309     | 0.250047    | BGIOSGA017821 | XP_006644887.1 F-box protein At4g18380-like                                                                              |
| TCONS_00002344 | 0.117526 | -2.4795      | -0.815641   | BGIOSGA004985 | XP_006645174.1 patatin-like protein 2                                                                                    |
| TCONS_00004367 | 0.117553 | 1.67427      | 1.09118     | BGIOSGA000851 | XP_006644689.1 uncharacterized tRNA/rRNA methyltransferase slr0955                                                       |
| TCONS_00003425 | 0.117696 | 0.109958     | 0.50241     | BGIOSGA001796 | XP_006645814.2 lipamide acyltransferase component of branched-chain alpha-keto acid dehydrogenase complex, mitochondrial |
| TCONS_00020464 | 0.117797 | 0.767359     | -0.0731765  | BGIOSGA028164 | XP_015690956.1 glucose-6-phosphate isomerase, cytosolic B                                                                |
| TCONS_00009080 | 0.117833 | 0.84303      | 1.42551     | BGIOSGA005323 | NP_001031856.1 structural maintenance of chromosomes-like protein, putative (DUF3531)                                    |
| TCONS_00012772 | 0.118086 | -0.396137    | -0.746637   | BGIOSGA002282 | XP_004982373.2CBL-interacting protein kinase 7                                                                           |
| TCONS_00011683 | 0.118251 | 0.429138     | 0.28457     | BGIOSGA003918 | XP_012698500.1ethylene-responsive transcription factor ERF073                                                            |
| TCONS_00011293 | 0.118305 | -0.040014    | -0.139432   | BGIOSGA017034 | XP_006651997.1 probable cellulose synthase A catalytic subunit 5 [UDP-forming]                                           |
| TCONS_00030280 | 0.118473 | 0.185975     | -0.485672   | BGIOSGA020770 | XP_006660780.1 cinnamoyl-CoA reductase 1-like                                                                            |
| TCONS_00014075 | 0.118537 | -0.512792    | -0.0288032  | BGIOSGA016226 | XP_006652200.1 ankyrin repeat and SAM domain-containing protein 6-like                                                   |
| TCONS_00023351 | 0.118537 | 1.26482      | 0.163842    | #N/A          | #N/A                                                                                                                     |
| TCONS_00006240 | 0.118561 | #N/A         | -0.943732   | BGIOSGA013269 | XP_004952846.1probable serine/threonine-protein kinase At1g01540 isoform X2                                              |
| TCONS_00016124 | 0.118587 | 0.55067      | 0.544373    | BGIOSGA014852 | XP_024311292.1microtubule-associated protein futsch isoform X2                                                           |
| TCONS_00032241 | 0.118664 | -0.204751    | -0.163774   | BGIOSGA011911 | XP_006661783.1 protein NETWORKED 1D                                                                                      |
| TCONS_00027391 | 0.118825 | 0.894835     | 0.277663    | BGIOSGA024643 | XP_015696029.1 DEAD-box ATP-dependent RNA helicase 42                                                                    |
| TCONS_00031585 | 0.119255 | 1.10189      | 1.53712     | BGIOSGA028804 | YP_008815731.1photosystem II protein D1 (plastid)                                                                        |
| TCONS_00014807 | 0.119379 | 0.00104821   | 0.860806    | BGIOSGA008817 | XP_015692309.1 mechanosensitive ion channel protein 1, mitochondrial-like isoform X1                                     |
| TCONS_00007392 | 0.119433 | 0.941184     | 1.88941     | BGIOSGA031637 | XP_012700817.1 polyubiquitin-like                                                                                        |
| TCONS_00003326 | 0.119598 | 0.355191     | 0.505163    | BGIOSGA014054 | XP_006645773.1 somatic embryogenesis receptor kinase 1                                                                   |
| TCONS_00030053 | 0.119618 | -0.158088    | -0.790887   | BGIOSGA003282 | XP_006660629.1 cinnamoyl-CoA reductase 1-like                                                                            |
| TCONS_00020235 | 0.119618 | -0.107975    | 0.422401    | BGIOSGA022426 | XP_015694282.1PREDICTED: LOW QUALITY PROTEIN: uncharacterized protein LOC102718657                                       |
| TCONS_00009430 | 0.119655 | -0.77543     | -0.80126    | BGIOSGA011981 | XP_015690724.1 polyadenylate-binding protein-interacting protein 7-like                                                  |
| TCONS_00014487 | 0.119767 | -8.98436E-05 | 0.76833     | BGIOSGA016646 | XP_015691749.1PREDICTED: uncharacterized protein ycf20                                                                   |
| TCONS_00015296 | 0.119922 | 0.0547655    | 0.114538    | BGIOSGA014159 | XP_004975019.1peptidyl-prolyl cis-trans isomerase Pin1                                                                   |
| TCONS_00003127 | 0.119929 | -2.48252     | -0.319076   | BGIOSGA000352 | XP_006643928.2 G-type lectin S-receptor-like serine/threonine-protein kinase At2g19130                                   |
| TCONS_00029941 | 0.119974 | -3.64511     | -0.728703   | BGIOSGA028570 | XP_015696874.1 serine/threonine-protein kinase CDL1-like                                                                 |
| TCONS_00003019 | 0.120116 | 0.600884     | 0.187681    | BGIOSGA029870 | XP_022682630.1DEAD-box ATP-dependent RNA helicase 20                                                                     |
| TCONS_00005947 | 0.120218 | -0.423354    | 0.663719    | BGIOSGA029185 | XP_015689347.1 60S ribosomal protein L10a-like                                                                           |
| TCONS_00006092 | 0.120344 | 0.209717     | 1.07717     | BGIOSGA006441 | XP_006647287.1PREDICTED: uncharacterized protein LOC102714806                                                            |
| TCONS_00014524 | 0.120375 | -0.20014     | -0.492751   | BGIOSGA031219 | XP_006652467.1 protein NLP2-like isoform X1                                                                              |
| TCONS_00027399 | 0.120634 | -0.0307527   | -0.00532946 | BGIOSGA027061 | XP_006659154.1 dnaJ homolog subfamily B member 4                                                                         |
| TCONS_00037256 | 0.12083  | -3.42835     | -1.20309    | BGIOSGA013092 | XP_015698689.1PREDICTED: uncharacterized protein LOC102705026                                                            |
| TCONS_00006853 | 0.120936 | 0.545947     | -0.0833151  | BGIOSGA009032 | XP_015689266.1PREDICTED: uncharacterized protein LOC102719358                                                            |
| TCONS_00020043 | 0.120983 | -0.445294    | -0.484756   | BGIOSGA030756 | XP_015693439.1 probable methyltransferase PMT15                                                                          |
| TCONS_00009409 | 0.121018 | -1.05453     | -0.131486   | BGIOSGA035713 | XP_006651086.2PREDICTED: uncharacterized protein LOC102700608 isoform X1                                                 |
| TCONS_00011258 | 0.121277 | 0.900785     | 0.587128    | BGIOSGA024833 | XP_004981197.1DEAD-box ATP-dependent RNA helicase 3B, chloroplastic                                                      |
| TCONS_00037454 | 0.121572 | -0.180137    | -0.0538212  | BGIOSGA035903 | XP_015698819.1 SPX and EXS domain-containing protein 5                                                                   |
| TCONS_00023571 | 0.121759 | -0.90627     | -0.382624   | BGIOSGA040468 | XP_006657648.2 tyrosine decarboxylase 1                                                                                  |
| TCONS_00003635 | 0.121802 | -0.304778    | 0.472056    | BGIOSGA019815 | XP_003567735.1nitrate regulatory gene2 protein                                                                           |
| TCONS_00016797 | 0.122134 | 0.0093677    | 0.465755    | BGIOSGA014169 | XP_006652964.1 U3 small nucleolar ribonucleoprotein protein IMP3                                                         |
| TCONS_00021200 | 0.122175 | 0.594635     | 0.308244    | BGIOSGA032116 | XP_006656338.1 serine/threonine-protein kinase HT1                                                                       |
| TCONS_00036159 | 0.122176 | -0.296437    | 0.330125    | BGIOSGA037511 | XP_003575781.1 uncharacterized protein LOC100843284                                                                      |
| TCONS_00032023 | 0.122581 | -0.515677    | 0.274992    | BGIOSGA017531 | XP_004983274.1alpha-L-fucosidase 2                                                                                       |
| TCONS_00009688 | 0.122623 | 0.304641     | 0.320628    | BGIOSGA032595 | XP_012698390.1chloride conductance regulatory protein ICln                                                               |
| TCONS_00003241 | 0.12264  | 0.298036     | 0.0918237   | BGIOSGA005780 | XP_006644008.1 syntaxin-22-like                                                                                          |
| TCONS_00023143 | 0.122699 | -0.84384     | 0.660669    | BGIOSGA028051 | XP_006657457.1 putative deoxyribonuclease TATDN1                                                                         |
| TCONS_00030443 | 0.122731 | 0.079078     | -0.701164   | BGIOSGA029359 | XP_004957492.13-dehydroquinate synthase, chloroplastic                                                                   |
| TCONS_00006689 | 0.122841 | -2.34652     | -0.722154   | BGIOSGA022835 | XP_004953564.1probable xyloglucan endotransglucosylase/hydrolase protein 30                                              |

transcriptome

|                |          |             |            |               |                                                                                                          |
|----------------|----------|-------------|------------|---------------|----------------------------------------------------------------------------------------------------------|
| TCONS_00023401 | 0.122958 | -1.34667    | 0.0551639  | BGIOSGA036961 | XP_006657581.1 UDP-glycosyltransferase 76C2-like                                                         |
| TCONS_00007835 | 0.123087 | -1.81982    | -0.497263  | BGIOSGA006649 | XP_015688879.1 sirohdrochlorin ferrochelataase, chloroplastic isoform X1                                 |
| TCONS_00008885 | 0.12311  | -2.20151    | -1.50208   | BGIOSGA005156 | XP_006647977.1 glucan endo-1,3-beta-glucosidase 12-like                                                  |
| TCONS_00028474 | 0.123238 | 0.650561    | 0.467142   | BGIOSGA011539 | XP_002444576.1NAC domain-containing protein 53                                                           |
| TCONS_00021679 | 0.123244 | -0.964717   | 0.655533   | BGIOSGA017267 | XP_015693931.1 putative receptor protein kinase ZmPK1                                                    |
| TCONS_00008877 | 0.123263 | 0.314922    | -0.186256  | BGIOSGA021971 | XP_006647970.1 proteasome subunit beta type-6-like                                                       |
| TCONS_00003279 | 0.123327 | 0.70336     | 0.282605   | BGIOSGA001211 | XP_015688136.1 UBP1-associated protein 2A-like                                                           |
| TCONS_00009810 | 0.123483 | 0.520912    | 0.4713     | BGIOSGA012364 | XP_015690453.1 protein MODIFIER OF SNC1 11                                                               |
| TCONS_00003734 | 0.123523 | 0.0218558   | 1.54562    | BGIOSGA008526 | XP_015688890.1PREDICTED: uncharacterized protein LOC102712132                                            |
| TCONS_00018181 | 0.12356  | -0.328387   | 0.566258   | BGIOSGA000888 | XP_006654695.1PREDICTED: uncharacterized protein LOC102719206                                            |
| TCONS_00028362 | 0.12356  | -0.0653523  | 0.15122    | BGIOSGA002250 | XP_008664221.1uncharacterized LOC100277175 isoform X1                                                    |
| TCONS_00004505 | 0.12356  | #NA         | #NA        | BGIOSGA013826 | XP_004970175.1uncharacterized protein LOC1011755031                                                      |
| TCONS_00019063 | 0.12356  | 0.671613    | 1.47315    | #NA           | #NA                                                                                                      |
| TCONS_00006878 | 0.123613 | 0.925527    | 0.0333613  | BGIOSGA015654 | XP_012704268.1transcription termination factor MTERF2, chloroplastic                                     |
| TCONS_00025526 | 0.123666 | -1.0462     | -2.90183   | BGIOSGA007873 | XP_004968896.1SPX domain-containing protein 6                                                            |
| TCONS_00031207 | 0.123731 | -0.466226   | -1.06896   | BGIOSGA024887 | XP_012704300.1L-type lectin-domain containing receptor kinase IV.1                                       |
| TCONS_00030449 | 0.123826 | 1.07851     | 0.851754   | BGIOSGA028752 | XP_006661487.1 mediator of RNA polymerase II transcription subunit 4                                     |
| TCONS_00033815 | 0.123867 | 0.0809319   | 0.00174519 | BGIOSGA028591 | NP_001136713.1zinc finger, C3HC4 type family protein                                                     |
| TCONS_00014480 | 0.123906 | -0.378234   | 0.0528144  | BGIOSGA018024 | XP_015691711.1 kelch repeat-containing protein At3g27220-like                                            |
| TCONS_00016021 | 0.123944 | -1.71421    | -0.915954  | BGIOSGA014955 | XP_002447971.1uncharacterized protein LOC8073441 isoform X2                                              |
| TCONS_00000900 | 0.123945 | -0.0748907  | -0.36232   | BGIOSGA002906 | XP_015693885.1 polynucleotide 5'-hydroxyl-kinase NOL9-like                                               |
| TCONS_00028157 | 0.12399  | 0.587549    | 0.47654    | BGIOSGA026827 | XP_006659490.2 zinc finger protein ZPR1-like                                                             |
| TCONS_00027010 | 0.124106 | -0.770058   | 0.647376   | BGIOSGA030107 | XP_015695993.1PREDICTED: uncharacterized protein LOC102703145                                            |
| TCONS_00023637 | 0.124269 | -0.00895886 | 0.275668   | BGIOSGA013307 | XP_006657676.1 growth-regulating factor 11                                                               |
| TCONS_00010214 | 0.124387 | 0.837744    | 0.614894   | BGIOSGA016274 | XP_006650150.2 calmodulin-binding transcription activator 3-like isoform X1                              |
| TCONS_00028798 | 0.124439 | -1.47406    | -0.948504  | BGIOSGA030543 | XP_006660549.1 delta(8)-fatty-acid desaturase 2-like                                                     |
| TCONS_00006362 | 0.124452 | 0.179007    | 0.192468   | BGIOSGA026374 | NP_001148018.1hypoxia induced protein conserved region containing protein                                |
| TCONS_00009894 | 0.124471 | 0.777929    | 0.639894   | BGIOSGA023675 | XP_021310192.1sarcoplasmic reticulum histidine-rich calcium-binding protein                              |
| TCONS_00013123 | 0.124697 | 0.739807    | 0.152233   | BGIOSGA003643 | XP_015690988.1 zinc finger BED domain-containing protein RICESLEEPER 2                                   |
| TCONS_00013433 | 0.124738 | 0.502631    | 0.0518525  | BGIOSGA009552 | XP_002463627.1phosphatidylinositol/phosphatidylcholine transfer protein SFH2                             |
| TCONS_00005522 | 0.12483  | -3.40699    | -2.00411   | BGIOSGA028081 | XP_006648775.1 phosphopantothenate--cysteine ligase 1 isoform X2                                         |
| TCONS_00007063 | 0.124873 | -0.386108   | 0.0250757  | BGIOSGA009244 | XP_015689287.1 probable starch synthase 4, chloroplastic/amyloplastic                                    |
| TCONS_00018283 | 0.125064 | -0.0820353  | 0.808302   | BGIOSGA001021 | XP_015692845.1PREDICTED: uncharacterized protein LOC102702944                                            |
| TCONS_00031683 | 0.125246 | 0.162427    | -0.190295  | BGIOSGA008859 | XP_006662104.1 lysine-specific demethylase JM706 isoform X1                                              |
| TCONS_00034655 | 0.125283 | -1.62165    | 0.741403   | BGIOSGA034174 | XP_006663355.1 general transcription factor 3C polypeptide 3 isoform X1                                  |
| TCONS_00003057 | 0.125458 | 0.139503    | -0.0160109 | BGIOSGA011945 | XP_006643885.2 pentatricopeptide repeat-containing protein DOT4, chloroplastic                           |
| TCONS_00036252 | 0.125547 | -0.419117   | -0.0724153 | BGIOSGA037611 | XP_006664113.2 membrane magnesium transporter                                                            |
| TCONS_00016209 | 0.125585 | -0.875527   | -0.358     | BGIOSGA014763 | XP_006653580.1 F-box protein At1g47056-like                                                              |
| TCONS_00032507 | 0.125599 | 0.883183    | 0.265345   | BGIOSGA031613 | XP_006662478.1 protein STABILIZED1                                                                       |
| TCONS_00025778 | 0.125742 | -0.313387   | -0.902342  | BGIOSGA011937 | XP_006659024.2 receptor homology region, transmembrane domain- and RING domain-containing protein 2-like |
| TCONS_00004660 | 0.126044 | 0.790863    | -0.420717  | BGIOSGA025958 | XP_006644946.1 UPF0051 protein ABC18, chloroplastic                                                      |
| TCONS_00016532 | 0.126056 | -1.04643    | 0.300686   | BGIOSGA009201 | XP_006653725.1 UV-B-induced protein At3g17800, chloroplastic-like                                        |
| TCONS_00016962 | 0.126118 | -0.98677    | -0.766048  | BGIOSGA019013 | XP_006653949.1PREDICTED: uncharacterized protein LOC102711430                                            |
| TCONS_00011598 | 0.126232 | 0.0736605   | -0.891803  | BGIOSGA006455 | XP_015689769.1 photosynthetic NDH subunit of subcomplex B 2, chloroplastic                               |
| TCONS_00037220 | 0.126237 | 0.198474    | -0.475298  | BGIOSGA037010 | XP_020407159.1membrane-associated phospholipid phosphatase isoform X1                                    |
| TCONS_00009678 | 0.126241 | -4.37455    | -0.437538  | BGIOSGA032576 | XP_006649732.1 filament-like plant protein 4                                                             |
| TCONS_00027759 | 0.126469 | -0.066711   | 0.569078   | BGIOSGA036394 | XP_015696093.1 large proline-rich protein bag6 isoform X2                                                |
| TCONS_00012957 | 0.126515 | 0.720175    | 1.09325    | BGIOSGA010032 | XP_006650422.1 angio-associated migratory cell protein                                                   |
| TCONS_00007290 | 0.126623 | -0.0623421  | 0.608726   | BGIOSGA007192 | XP_015689490.1 BOI-related E3 ubiquitin-protein ligase 1-like                                            |
| TCONS_00035638 | 0.126623 | 0.710191    | 1.05034    | BGIOSGA022052 | XP_006663854.2 chaperone protein DnaJ-like                                                               |
| TCONS_00021868 | 0.126627 | 0.163459    | 0.224774   | BGIOSGA009083 | XP_015693772.1 F-box protein FBW2-like                                                                   |

transcriptome

|                |          |              |            |               |                                                                              |
|----------------|----------|--------------|------------|---------------|------------------------------------------------------------------------------|
| TCONS_00001837 | 0.126717 | -0.344992    | -0.101015  | BGIOSGA004472 | XP_006644717.1 reticulon-4-interacting protein 1, mitochondrial              |
| TCONS_00002490 | 0.126726 | 1.25163      | 1.9508     | BGIOSGA005134 | XP_007134493.1 hypothetical protein PHAVU_010G051900g                        |
| TCONS_00007908 | 0.126726 | #NA          | #NA        | #NA           | #NA                                                                          |
| TCONS_00018991 | 0.126726 | -1.33333     | -0.856555  | #NA           | #NA                                                                          |
| TCONS_00001134 | 0.126763 | 1.34547      | 0.798453   | BGIOSGA003759 | XP_006646000.1 PREDICTED: uncharacterized protein At1g51745, partial         |
| TCONS_00019143 | 0.126934 | 1.33391      | 0.236485   | BGIOSGA018213 | XP_006654299.1 phospholipase D zeta 1-like isoform X1                        |
| TCONS_00036463 | 0.127017 | -0.349999    | 0.3752     | BGIOSGA000840 | XP_006664221.2 GATA transcription factor 2-like                              |
| TCONS_00018220 | 0.127226 | 0.072349     | 0.0834778  | #NA           | XP_003565984.1 uncharacterized protein ycf36                                 |
| TCONS_00013063 | 0.127285 | 0.462503     | 0.48001    | BGIOSGA036435 | XP_006650498.1 vam6/Vps39-like protein                                       |
| TCONS_00000219 | 0.127331 | 0.610264     | -0.219926  | BGIOSGA000907 | XP_006643762.1 PREDICTED: uncharacterized protein LOC102718117               |
| TCONS_00008928 | 0.127728 | 0.173787     | -0.177514  | BGIOSGA022463 | XP_006648015.1 ethylene-responsive transcription factor 1                    |
| TCONS_00010170 | 0.127853 | -0.352436    | -0.394073  | BGIOSGA008841 | XP_006651427.1 protein phosphatase 2C 32-like                                |
| TCONS_00010491 | 0.127871 | -0.178341    | -0.505772  | BGIOSGA013095 | XP_002461077.2 uncharacterized protein LOC8079369                            |
| TCONS_00018961 | 0.127996 | -0.000279891 | 0.0904644  | BGIOSGA018402 | XP_006654217.1 protein SAD1/UNC-84 domain protein 1-like                     |
| TCONS_00009471 | 0.128196 | 0.194049     | 0.448566   | BGIOSGA017027 | XP_006649530.1 PREDICTED: uncharacterized protein LOC102717879 isoform X2    |
| TCONS_00021216 | 0.128245 | #NA          | #NA        | BGIOSGA003091 | XP_006643967.2 tubby-related protein 1-like                                  |
| TCONS_00004069 | 0.128419 | -0.268543    | -0.112528  | BGIOSGA001119 | XP_020398008.1 ADP,ATP carrier protein 2, chloroplastic                      |
| TCONS_00004422 | 0.128662 | 0.290073     | 0.796732   | BGIOSGA000801 | XP_006646336.1 la-related protein 6A                                         |
| TCONS_00020311 | 0.128666 | 0.962018     | 0.593615   | BGIOSGA022507 | XP_006655894.1 ubiquitin-like protein ATG12                                  |
| TCONS_00035416 | 0.128683 | -0.312051    | -0.732075  | BGIOSGA024996 | XP_006663696.1 methylsterol monooxygenase 2-2-like                           |
| TCONS_00007603 | 0.128695 | 0.815689     | 0.374059   | BGIOSGA006872 | XP_015689478.1 YLP motif-containing protein 1 isoform X2                     |
| TCONS_00019684 | 0.128716 | -0.855053    | -0.455352  | BGIOSGA018669 | XP_010915190.1 hexokinase-2                                                  |
| TCONS_00021637 | 0.12875  | -0.231825    | -0.117351  | BGIOSGA033350 | XP_025985265.1 mitogen-activated protein kinase 6 isoform X3                 |
| TCONS_00019139 | 0.128764 | 0.355374     | -0.64007   | BGIOSGA018216 | XP_002440945.1 protein DEHYDRATION-INDUCED 19 homolog 2 isoform X1           |
| TCONS_00021370 | 0.128794 | 0.281531     | 0.349817   | BGIOSGA004017 | XP_003563563.1 CDPK-related kinase 3                                         |
| TCONS_00019670 | 0.128866 | 0.390251     | 0.752905   | BGIOSGA019929 | XP_006654686.1 protein LIKE COV 1-like                                       |
| TCONS_00029367 | 0.129114 | 0.105546     | 0.811172   | BGIOSGA031118 | XP_006660861.1 ribosomal RNA processing protein 36 homolog                   |
| TCONS_00013035 | 0.129145 | 0.943981     | -0.347107  | BGIOSGA009952 | XP_002464017.1 peptidyl-prolyl cis-trans isomerase FKBP17-2, chloroplastic   |
| TCONS_00000821 | 0.129479 | 0.921984     | 0.171727   | BGIOSGA017079 | XP_024315496.1 YTH domain-containing family protein 1                        |
| TCONS_00027371 | 0.129596 | 0.551965     | -0.267051  | BGIOSGA005953 | XP_003573476.1 vesicle-associated protein 1-2                                |
| TCONS_00005570 | 0.12967  | 0.246705     | 0.133619   | BGIOSGA020802 | XP_006646989.1 PREDICTED: uncharacterized protein LOC102717037               |
| TCONS_00001761 | 0.129714 | -0.337894    | 0.551188   | BGIOSGA000822 | NP_001315573.1 uncharacterized protein LOC103637583                          |
| TCONS_00037525 | 0.129726 | 0.355861     | 0.519192   | BGIOSGA018193 | XP_015698366.1 BTB/POZ domain-containing protein At1g30440-like              |
| TCONS_00026685 | 0.129944 | -1.24677     | -0.130862  | BGIOSGA028750 | XP_015695837.1 PREDICTED: uncharacterized protein LOC102723222               |
| TCONS_00024092 | 0.129949 | -0.359991    | -0.905074  | BGIOSGA026125 | XP_006658807.1 protein STRICTOSIDINE SYNTHASE-LIKE 4-like                    |
| TCONS_00019688 | 0.130092 | 0.804392     | -0.408273  | BGIOSGA017671 | XP_004961406.1 probable serine acetyltransferase 5                           |
| TCONS_00014535 | 0.13021  | 0.645981     | 0.474202   | BGIOSGA016700 | XP_006653565.2 cell division control protein 48 homolog B isoform X1         |
| TCONS_00010313 | 0.130308 | 0.447919     | 0.857747   | BGIOSGA023938 | XP_006650201.1 putative G3BP-like protein                                    |
| TCONS_00006284 | 0.130411 | 0.546139     | -0.0588581 | BGIOSGA009559 | XP_006647393.1 PHD finger protein ALFIN-LIKE 7                               |
| TCONS_00028855 | 0.130507 | 0.314402     | 0.514109   | BGIOSGA022434 | XP_015696467.1 zinc finger CCHC domain-containing protein 59                 |
| TCONS_00001003 | 0.130652 | 0.0889683    | 0.36733    | BGIOSGA010873 | XP_002455084.12-hydroxyacyl-CoA lyase                                        |
| TCONS_00005069 | 0.130787 | -0.680982    | -0.425736  | BGIOSGA004368 | XP_006645311.1 hexokinase-3 isoform X1                                       |
| TCONS_00023994 | 0.130864 | 0.917631     | 0.675196   | BGIOSGA026040 | XP_002460932.1 U-box domain-containing protein 4                             |
| TCONS_00020260 | 0.130919 | 0.567137     | 0.915582   | BGIOSGA022449 | XP_006655869.1 DNA-dependent metalloprotease WSS1                            |
| TCONS_00004782 | 0.130958 | 0.223079     | -0.208288  | BGIOSGA000432 | XP_002458820.1 protein BOLA2                                                 |
| TCONS_00014410 | 0.131146 | #NA          | 0.132674   | BGIOSGA004057 | XP_006647155.1 peroxisomal fatty acid beta-oxidation multifunctional protein |
| TCONS_00024714 | 0.131146 | -1.34002     | #NA        | BGIOSGA018450 | XP_002440849.1 D-amino-acid transaminase, chloroplastic                      |
| TCONS_00030788 | 0.131146 | 2.8299       | 3.13267    | BGIOSGA021998 | XP_015690285.1 40S ribosomal protein S20-1-like                              |
| TCONS_00028206 | 0.131327 | -0.733932    | 1.09705    | BGIOSGA030944 | XP_006660230.1 tRNA (cytosine(34)-C(5))-methyltransferase isoform X1         |
| TCONS_00019754 | 0.131387 | 0.156861     | 0.232066   | BGIOSGA017602 | XP_015692881.1 65-kDa microtubule-associated protein 3-like                  |
| TCONS_00015891 | 0.131425 | 0.482165     | 0.405383   | BGIOSGA011386 | XP_006652291.1 ribonuclease P protein subunit p25-like protein               |
| TCONS_00001018 | 0.131648 | 0.262349     | 0.568587   | BGIOSGA003620 | XP_006644211.1 mitogen-activated protein kinase kinase 1                     |
| TCONS_00004681 | 0.131651 | -1.41241     | -0.373232  | BGIOSGA017892 | XP_006646459.1 protein NETWORKED 2A-like                                     |
| TCONS_00026749 | 0.131855 | -0.104347    | -0.386625  | BGIOSGA013602 | XP_006659484.2 cytochrome P450 76M5-like                                     |
| TCONS_00026436 | 0.13186  | 0.33633      | -0.178257  | BGIOSGA017828 | XP_015695721.1 protein PHR1-LIKE 1-like                                      |
| TCONS_00004796 | 0.131898 | -0.29281     | 0.325651   | BGIOSGA028607 | XP_021310983.1 probable ion channel POLLUX                                   |

## transcriptome

|                |          |           |            |               |                                                                                                                                                                                                                                       |
|----------------|----------|-----------|------------|---------------|---------------------------------------------------------------------------------------------------------------------------------------------------------------------------------------------------------------------------------------|
| TCONS_00009980 | 0.132017 | 0.443885  | 0.686019   | BGIOSGA026709 | XP_006650014.1 ETHYLENE INSENSITIVE 3-like 1 protein                                                                                                                                                                                  |
| TCONS_00019276 | 0.132253 | -1.14542  | -0.11947   | BGIOSGA033878 | XP_006655309.1 cytochrome P450 734A1-like<br>XP_006655797.1 ubiquinone biosynthesis O-methyltransferase, mitochondrial                                                                                                                |
| TCONS_00020136 | 0.132518 | 1.65792   | 1.71426    | BGIOSGA022335 |                                                                                                                                                                                                                                       |
| TCONS_00037655 | 0.132518 | 0.657925  | 1.12929    | #N/A          | #N/A                                                                                                                                                                                                                                  |
| TCONS_00026579 | 0.132542 | 0.286063  | 0.391458   | BGIOSGA028647 | XP_015695594.1 tRNA modification GTPase MnmE                                                                                                                                                                                          |
| TCONS_00007363 | 0.132544 | 0.92458   | -0.177406  | BGIOSGA007121 | XP_002453316.1 transcription factor Sp8                                                                                                                                                                                               |
| TCONS_00029467 | 0.132678 | -0.203488 | -1.15566   | BGIOSGA034185 | XP_015696831.1 protein NLP1-like                                                                                                                                                                                                      |
| TCONS_00020995 | 0.132726 | 0.636393  | -0.277559  | BGIOSGA007405 | XP_006656220.1 phospholipase D alpha 2<br>XP_015689406.1 probable LRR receptor-like serine/threonine-protein kinase At1g53440<br>XP_006659026.1 putative 1-phosphatidylinositol-3-phosphate 5-kinase FAB1D                            |
| TCONS_00005724 | 0.132894 | -0.73613  | 0.55805    | BGIOSGA020685 | XP_006645797.2 nodal modulator 1<br>XP_006647558.1 regulator of nonsense transcripts UPF2                                                                                                                                             |
| TCONS_00025779 | 0.133049 | 0.448596  | -0.0957686 | BGIOSGA026950 | XP_003562876.1 organic cation/carnitine transporter 2                                                                                                                                                                                 |
| TCONS_00003389 | 0.133101 | 0.602497  | 0.195105   | BGIOSGA001819 | XP_003568665.1 TLC domain-containing protein At5g14285                                                                                                                                                                                |
| TCONS_00008433 | 0.133319 | 0.65793   | 0.0235772  | BGIOSGA014690 | XP_006665019.1 F-box protein PP2-A13-like<br>XP_006655865.1 probable cyclic nucleotide-gated ion channel 17                                                                                                                           |
| TCONS_00023906 | 0.133354 | 0.173314  | 0.534205   | BGIOSGA019748 | XP_003580623.1 uncharacterized protein LOC100837954                                                                                                                                                                                   |
| TCONS_00017501 | 0.133384 | 0.519199  | 0.251974   | BGIOSGA003212 | XP_006652012.2 probable ion channel CASTOR isoform X1                                                                                                                                                                                 |
| TCONS_00006632 | 0.133564 | 0.352321  | -0.535072  | BGIOSGA029410 | XP_015697167.1 metacaspase-1<br>XP_015694363.1 potassium transporter 24-like<br>XP_004972473.1 succinate dehydrogenase [ubiquinone] flavoprotein subunit, mitochondrial<br>XP_006649525.1 zinc finger CCH domain-containing protein 4 |
| TCONS_00020255 | 0.133609 | 0.528806  | 0.16546    | BGIOSGA005462 | XP_006650654.2 cold-regulated 413 plasma membrane protein 2                                                                                                                                                                           |
| TCONS_00028572 | 0.133634 | -0.169784 | 0.436788   | BGIOSGA030314 | XP_006655892.1 fatty-acid-binding protein 2-like<br>XP_006645346.2 ABC transporter D family member 1-like<br>XP_012700334.1 transcription factor PCF8 isoform X2                                                                      |
| TCONS_00011313 | 0.134172 | 0.267708  | 0.480662   | BGIOSGA000420 | XP_021302228.1 putative F-box/FBD/LRR-repeat protein At4g03220 isoform X2                                                                                                                                                             |
| TCONS_00031643 | 0.134293 | -0.288845 | 0.0610765  | #N/A          | XP_015698438.1 bifunctional epoxide hydrolase 2-like isoform X1                                                                                                                                                                       |
| TCONS_00022042 | 0.134485 | -0.796042 | -1.49267   | BGIOSGA021302 | XP_015689166.1 PREDICTED: uncharacterized protein LOC102720665                                                                                                                                                                        |
| TCONS_00024528 | 0.134567 | 1.23907   | 0.63395    | BGIOSGA034120 | XP_015690275.1 mitochondrial substrate carrier family protein B-like<br>XP_006662815.1 phosphatidylinositol 4-kinase beta 1-like                                                                                                      |
| TCONS_00009460 | 0.13465  | 0.826557  | 1.08509    | BGIOSGA012008 | XP_006664088.1 trafficking protein particle complex II-specific subunit 130 homolog isoform X2                                                                                                                                        |
| TCONS_00011030 | 0.134755 | 0.636952  | 0.0236086  | BGIOSGA003470 | XP_015694382.1 protein trichome birefringence-like                                                                                                                                                                                    |
| TCONS_00020306 | 0.135092 | 1.29178   | 0.799951   | BGIOSGA009140 | #N/A                                                                                                                                                                                                                                  |
| TCONS_00002604 | 0.135124 | 0.824626  | 0.0736519  | BGIOSGA036786 | XP_023157790.1 putative FBD-associated F-box protein At5g53635                                                                                                                                                                        |
| TCONS_00018119 | 0.135449 | -0.40679  | -0.0855956 | BGIOSGA034831 | XP_002460441.1 pirin-like protein At1g50590<br>XP_006644780.1 transcription initiation factor IIF subunit beta-like isoform X1                                                                                                        |
| TCONS_00021573 | 0.135502 | -0.451785 | -0.0408495 | BGIOSGA020417 | XP_006657610.1 prohibitin-2, mitochondrial<br>XP_006658154.2 RINT1-like protein MAG2L                                                                                                                                                 |
| TCONS_00032867 | 0.135626 | -0.288589 | -0.206636  | BGIOSGA034693 | XP_006663254.1 cleavage stimulating factor 64<br>XP_006661314.2 probable quinone oxidoreductase                                                                                                                                       |
| TCONS_00001256 | 0.135687 | 0.717583  | 0.645965   | BGIOSGA003883 | XP_006659698.1 peptidyl-prolyl cis-trans isomerase CYP18-2                                                                                                                                                                            |
| TCONS_00009750 | 0.135895 | 0.378522  | 0.995171   | BGIOSGA002419 | XP_006653834.1 NADPH--cytochrome P450 reductase-like                                                                                                                                                                                  |
| TCONS_00034505 | 0.135983 | 1.05497   | 0.346021   | BGIOSGA034317 | XP_006649825.1 tropinone reductase homolog At5g06060-like                                                                                                                                                                             |
| TCONS_00037340 | 0.136057 | 1.78054   | 1.06257    | BGIOSGA036027 | XP_014754219.1 peroxidase 25<br>XP_010228047.1 putative F-box protein At1g50870 isoform X2                                                                                                                                            |
| TCONS_00020325 | 0.136116 | -0.412433 | -0.377394  | BGIOSGA012471 | XP_006654697.1 PREDICTED: uncharacterized protein LOC102719769                                                                                                                                                                        |
| TCONS_00032064 | 0.136423 | -0.34768  | 0.119789   | #N/A          | XP_006652118.2 PREDICTED: uncharacterized protein LOC102702648                                                                                                                                                                        |
| TCONS_00014449 | 0.136508 | -1.51736  | -0.7308    | BGIOSGA005687 | XP_006659649.1 acid sugar phosphatase isoform X1                                                                                                                                                                                      |
| TCONS_00029254 | 0.136522 | -0.142943 | 0.550424   | BGIOSGA028543 | XP_004984976.1 patatin-like protein 7                                                                                                                                                                                                 |
| TCONS_00004486 | 0.136537 | 0.0280615 | -0.387055  | BGIOSGA017744 | XP_006646686.1 F-box protein At3g54460                                                                                                                                                                                                |
| TCONS_00024880 | 0.136627 | 0.31188   | 0.694962   | BGIOSGA009574 | XP_015688888.1 protein LYK5-like                                                                                                                                                                                                      |
| TCONS_00024380 | 0.13672  | 0.136995  | 0.314301   | BGIOSGA030858 | XP_006650200.1 protein LONGIFOLIA 2-like<br>XP_015697195.1 PREDICTED: uncharacterized protein LOC102707343                                                                                                                            |
| TCONS_00033066 | 0.136758 | 0.553457  | 0.216181   | BGIOSGA034909 | XP_006657012.1 protein trichome birefringence-like 24                                                                                                                                                                                 |
| TCONS_00029163 | 0.136831 | 0.676776  | 0.50103    | BGIOSGA030915 | XP_006645972.1 DIBOA-glucoside dioxygenase BX6-like                                                                                                                                                                                   |
| TCONS_00028468 | 0.136945 | 0.0353837 | 1.23076    | BGIOSGA026488 |                                                                                                                                                                                                                                       |
| TCONS_00015083 | 0.136976 | 0.0736523 | 0.361896   | BGIOSGA029279 |                                                                                                                                                                                                                                       |
| TCONS_00011980 | 0.137303 | 0.402417  | 1.09559    | BGIOSGA003544 |                                                                                                                                                                                                                                       |
| TCONS_00000290 | 0.137446 | -1.72907  | -1.32634   | BGIOSGA012711 |                                                                                                                                                                                                                                       |
| TCONS_00000958 | 0.137574 | -1.09752  | -0.112086  | BGIOSGA003562 |                                                                                                                                                                                                                                       |
| TCONS_00019685 | 0.137644 | #NA       | #NA        | BGIOSGA009548 |                                                                                                                                                                                                                                       |
| TCONS_00015463 | 0.137644 | 0.387576  | 0.853776   | BGIOSGA014637 |                                                                                                                                                                                                                                       |
| TCONS_00027047 | 0.137789 | -0.127832 | -0.648576  | BGIOSGA029097 |                                                                                                                                                                                                                                       |
| TCONS_00009701 | 0.137805 | -0.360848 | -2.06019   | BGIOSGA019252 |                                                                                                                                                                                                                                       |
| TCONS_00002537 | 0.138156 | 0.236528  | 0.55555    | BGIOSGA005181 |                                                                                                                                                                                                                                       |
| TCONS_00006649 | 0.138235 | 1.04252   | -0.591339  | BGIOSGA034249 |                                                                                                                                                                                                                                       |
| TCONS_00010312 | 0.138272 | -0.898081 | 1.03537    | BGIOSGA034577 |                                                                                                                                                                                                                                       |
| TCONS_00007630 | 0.13844  | 0.49362   | 0.166972   | BGIOSGA006850 |                                                                                                                                                                                                                                       |
| TCONS_00020812 | 0.138531 | 0.671208  | 0.874526   | BGIOSGA013107 |                                                                                                                                                                                                                                       |
| TCONS_00003730 | 0.138833 | -1.35102  | 1.11392    | BGIOSGA005991 |                                                                                                                                                                                                                                       |

transcriptome

|                |          |           |            |               |                                                                                                                                      |
|----------------|----------|-----------|------------|---------------|--------------------------------------------------------------------------------------------------------------------------------------|
| TCONS_00031565 | 0.138833 | -0.351018 | #NA        | BGIOSGA033376 | XP_003563429.1 uncharacterized protein                                                                                               |
| TCONS_00036083 | 0.138833 | 0.97091   | -0.886076  | #N/A          | LOC100845879                                                                                                                         |
| TCONS_00024964 | 0.138842 | 0.520458  | 0.568737   | BGIOSGA007341 | XP_006664840.1 dihydrolipoyllysine-residue acetyltransferase component 3 of pyruvate dehydrogenase complex, mitochondrial-like       |
| TCONS_00029808 | 0.138847 | -0.171597 | 0.605627   | BGIOSGA020435 | XP_015696296.1 rab3 GTPase-activating protein non-catalytic subunit                                                                  |
| TCONS_00015085 | 0.139127 | -0.889887 | -1.21504   | BGIOSGA015857 | XP_006652936.1 probable receptor-like serine/threonine-protein kinase At5g57670                                                      |
| TCONS_00021532 | 0.139252 | -0.501152 | -0.0601802 | BGIOSGA022018 | XP_006656590.1 ABC transporter B family member 25, mitochondrial-like                                                                |
| TCONS_00009550 | 0.139262 | 0.208248  | -0.532875  | BGIOSGA021314 | XP_006649617.1 pentatricopeptide repeat-containing protein At3g29290                                                                 |
| TCONS_00019358 | 0.139285 | 1.67245   | 0.401589   | BGIOSGA013904 | XP_004961969.1 subtilisin-like protease SBT3.11                                                                                      |
| TCONS_00019217 | 0.139673 | -2.42704  | -1.24351   | BGIOSGA010530 | XP_006650604.2 COBRA-like protein 3 isoform X2                                                                                       |
| TCONS_00001240 | 0.139779 | 0.332644  | 0.661848   | BGIOSGA003868 | XP_006646051.2 NADH dehydrogenase [ubiquinone] complex 1, assembly factor 7                                                          |
| TCONS_00003886 | 0.139822 | -0.615239 | -0.28788   | BGIOSGA001328 | XP_015691417.1 SNF1-related protein kinase regulatory subunit gamma-1-like                                                           |
| TCONS_00014149 | 0.139893 | 0.617661  | 0.175162   | BGIOSGA015187 | XP_006652219.1 dihydrolipoyllysine-residue succinyltransferase component of 2-oxoglutarate dehydrogenase complex 1, chloroplast-like |
| TCONS_00021552 | 0.139981 | 0.490211  | -0.946471  | BGIOSGA016022 | XP_006656605.2 transketolase, chloroplast-like                                                                                       |
| TCONS_00002366 | 0.139989 | 1.23238   | 0.111128   | BGIOSGA005003 | XP_004970959.1 uncharacterized protein                                                                                               |
| TCONS_00022834 | 0.139989 | #NA       | 1.11113    | #N/A          | LOC101753699                                                                                                                         |
| TCONS_00029040 | 0.140016 | 0.0539492 | 0.532837   | BGIOSGA008971 | NP_001105285.1 senescence-associated protein DH                                                                                      |
| TCONS_00029200 | 0.140022 | 1.22667   | 1.06559    | BGIOSGA026778 | XP_006660733.1 tRNA (cytosine(34)-C(5))-methyltransferase                                                                            |
| TCONS_00028207 | 0.140093 | 0.296655  | 0.624623   | BGIOSGA031387 | XP_006659515.1 phospho-2-dehydro-3-deoxyheptonate aldolase 1, chloroplast-like                                                       |
| TCONS_00019751 | 0.140296 | 0.256724  | 0.628755   | BGIOSGA006734 | XP_015692692.1 sulfhydryl oxidase 1                                                                                                  |
| TCONS_00004858 | 0.14052  | -0.058669 | 1.15753    | BGIOSGA016480 | XP_021311627.1 PHD finger protein ALFIN-LIKE 6 isoform X1                                                                            |
| TCONS_00009052 | 0.14073  | -0.111344 | 0.329979   | BGIOSGA005352 | XP_015688928.1 protein N-lysine methyltransferase METTL21A                                                                           |
| TCONS_00011368 | 0.141    | 0.60534   | 0.425894   | BGIOSGA013986 | XP_006650929.1 sucrose nonfermenting 4-like protein isoform X2                                                                       |
| TCONS_00019973 | 0.141069 | -4.45041  | -1.95913   | BGIOSGA022160 | XP_004964307.1 WAT1-related protein At3g30340                                                                                        |
| TCONS_00003221 | 0.141099 | 2.45327   | 3.56784    | BGIOSGA001996 | XP_006643993.1 DNA replication complex GINS protein PSF2                                                                             |
| TCONS_00003240 | 0.141099 | -0.354081 | 0.108413   | BGIOSGA003170 | XP_015688086.1 PREDICTED: uncharacterized protein LOC107303456                                                                       |
| TCONS_00013158 | 0.141099 | 0.645919  | 0.108413   | BGIOSGA018725 | NP_001141300.1 Suppressor/enhancer of lin-12 protein 9 precursor                                                                     |
| TCONS_00003504 | 0.141099 | #NA       | #NA        | #N/A          | #N/A                                                                                                                                 |
| TCONS_00027541 | 0.141164 | -0.406137 | -0.291938  | BGIOSGA027470 | XP_014660873.1 AUGCIN subunit 2                                                                                                      |
| TCONS_00002335 | 0.141227 | 0.720237  | 0.120093   | BGIOSGA004978 | XP_006645165.1 60S ribosomal protein L5-1                                                                                            |
| TCONS_00009127 | 0.141231 | -0.928787 | 0.178763   | BGIOSGA011653 | XP_006650947.2 formyltetrahydrofolate deformylase 2, mitochondrial-like                                                              |
| TCONS_00018652 | 0.141239 | 0.519304  | -0.167236  | BGIOSGA003476 | XP_003568901.1 E3 ubiquitin-protein ligase RF12                                                                                      |
| TCONS_00006508 | 0.141282 | 0.452631  | 0.45424    | BGIOSGA027286 | XP_006648859.1 probable metal-nicotianamine transporter YSL14                                                                        |
| TCONS_00026420 | 0.141317 | 0.105535  | 0.0145719  | BGIOSGA030352 | XP_004952139.1 D-aminoacyl-tRNA deacylase                                                                                            |
| TCONS_00036994 | 0.141774 | 0.354452  | -0.219939  | BGIOSGA036385 | XP_006663939.1 U-box domain-containing protein 43-like                                                                               |
| TCONS_00022680 | 0.141854 | 0.661573  | 0.67011    | BGIOSGA020761 | XP_006657202.2 ubiquitin carboxyl-terminal hydrolase 18-like isoform X1                                                              |
| TCONS_00003518 | 0.141928 | 0.180179  | 0.435164   | BGIOSGA036044 | XP_015688216.1 auxilin-related protein 2-like                                                                                        |
| TCONS_00016648 | 0.142173 | #NA       | -0.894224  | BGIOSGA008857 | XP_022685093.1 uncharacterized protein LOC101771785                                                                                  |
| TCONS_00017262 | 0.142173 | -0.219104 | 0.386585   | BGIOSGA029577 | XP_002439406.1 uncharacterized protein LOC8065892                                                                                    |
| TCONS_00021181 | 0.142173 | 0.644477  | -0.894224  | #N/A          | #N/A                                                                                                                                 |
| TCONS_00031288 | 0.142173 | -1.67745  | -0.63119   | #N/A          | #N/A                                                                                                                                 |
| TCONS_00031927 | 0.142183 | 0.495103  | 0.215768   | BGIOSGA032217 | XP_015697443.1 probable disease resistance protein At1g58602 isoform X1                                                              |
| TCONS_00021875 | 0.142289 | 0.292866  | 0.270376   | BGIOSGA009074 | XP_006655922.1 oxidation resistance protein 1-like                                                                                   |
| TCONS_00007758 | 0.142298 | 0.261529  | 0.434143   | BGIOSGA019929 | XP_006647146.1 protein LIKE COV 1-like                                                                                               |
| TCONS_00002244 | 0.142419 | -0.5513   | -0.286973  | BGIOSGA026164 | XP_006645084.1 serine/threonine-protein kinase SAPK4                                                                                 |
| TCONS_00016905 | 0.142435 | -0.96719  | -0.502452  | BGIOSGA015125 | XP_006653056.1 NDR1/HIN1-Like protein 3-like                                                                                         |
| TCONS_00021294 | 0.142581 | -0.364433 | 0.11933    | BGIOSGA023523 | XP_006656414.1 PREDICTED: uncharacterized protein At2g39910                                                                          |
| TCONS_00015857 | 0.142769 | -0.842456 | 0.389734   | BGIOSGA015132 | XP_003581203.3 ABC transporter B family member 29, chloroplast-like                                                                  |
| TCONS_00031578 | 0.142906 | 0.315917  | 0.158566   | BGIOSGA020522 | XP_015697371.1 probable protein phosphatase 2C 72                                                                                    |
| TCONS_00035249 | 0.14298  | -0.698721 | 0.426293   | BGIOSGA033656 | XP_015698088.1 1-acyl-sn-glycerol-3-phosphate acyltransferase PLS1 isoform X2                                                        |
| TCONS_00009276 | 0.14322  | 0.643099  | 0.51826    | BGIOSGA011814 | XP_008672062.1 uncharacterized protein LOC100278549 isoform X1                                                                       |
| TCONS_00027877 | 0.14322  | -0.356901 | #NA        | #N/A          | #N/A                                                                                                                                 |
| TCONS_00032622 | 0.143239 | -0.428832 | -0.0558106 | BGIOSGA031488 | XP_006662006.1 PREDICTED: uncharacterized protein LOC102717375 isoform X1                                                            |
| TCONS_00031487 | 0.143368 | 0.153816  | 0.503931   | BGIOSGA033301 | XP_006662527.1 flavonol synthase/flavanone 3-hydroxylase-like                                                                        |

transcriptome

|                |          |            |            |               |                                                                                                      |
|----------------|----------|------------|------------|---------------|------------------------------------------------------------------------------------------------------|
| TCONS_00025877 | 0.143379 | 0.655201   | 0.620097   | BGIOSGA036349 | XP_015695752.1 E3 ubiquitin-protein ligase RGLG2-like                                                |
| TCONS_0001791  | 0.143578 | -0.144165  | -0.179022  | BGIOSGA004428 | XP_003569759.1endoribonuclease YBEY, chloroplastic                                                   |
| TCONS_00037168 | 0.143623 | -1.53726   | -0.590844  | BGIOSGA006676 | XP_021301308.1uncharacterized protein LOC8064056                                                     |
| TCONS_00013074 | 0.143845 | 1.01263    | 0.233408   | BGIOSGA004742 | XP_006650505.1PREDICTED: uncharacterized protein LOC102716856                                        |
| TCONS_00020864 | 0.143903 | 0.964048   | 0.972679   | BGIOSGA002172 | XP_015693609.1 protein BZR1 homolog 3-like                                                           |
| TCONS_00003794 | 0.14401  | -0.0407253 | -0.300056  | BGIOSGA013829 | XP_006644268.1 ras-related protein RIC1                                                              |
| TCONS_00012659 | 0.144069 | 0.138447   | -0.144729  | BGIOSGA032980 | XP_004982554.1pentatricopeptide repeat-containing protein At3g53700, chloroplastic                   |
| TCONS_00017023 | 0.144229 | 1.22674    | 1.6857     | BGIOSGA019070 | XP_015692947.1PREDICTED: uncharacterized protein LOC107304241                                        |
| TCONS_00008957 | 0.144483 | -0.303802  | -0.266157  | BGIOSGA005450 | XP_006649127.1 endochitinase A-like                                                                  |
| TCONS_00009302 | 0.144686 | -0.296029  | 0.00625951 | BGIOSGA011843 | XP_006649388.1 protein PIR                                                                           |
| TCONS_00026429 | 0.144699 | 0.443303   | 0.19116    | BGIOSGA016436 | XP_006659341.1 histone deacetylase 6-like                                                            |
| TCONS_00004180 | 0.145114 | 1.5445     | 1.11331    | BGIOSGA018867 | XP_006644526.2 long chain acyl-CoA synthetase 4-like                                                 |
| TCONS_00000116 | 0.145204 | -0.359498  | -0.638633  | BGIOSGA002473 | XP_006645453.1 multicopper oxidase LPR1-like                                                         |
| TCONS_00006992 | 0.1455   | -0.649882  | -0.34632   | BGIOSGA029989 | XP_006648026.1 E3 ubiquitin-protein ligase At1g63170-like                                            |
| TCONS_00021757 | 0.145545 | -0.722008  | 0.0720317  | BGIOSGA033901 | XP_006655863.2 probable folate-biopterin transporter 2                                               |
| TCONS_00013673 | 0.145568 | -0.0570642 | -0.6621    | BGIOSGA015833 | XP_010229311.1stress response protein NST1                                                           |
| TCONS_00009244 | 0.145641 | -0.227965  | -0.0209679 | BGIOSGA011180 | XP_006649331.1 serine/threonine-protein kinase CDL1-like isoform X4                                  |
| TCONS_00028178 | 0.145945 | -0.601372  | 0.761898   | BGIOSGA026807 | XP_006659499.1 sodium channel modifier 1-like                                                        |
| TCONS_00031704 | 0.146151 | -0.134507  | -0.376119  | BGIOSGA003149 | XP_004983488.1homeobox-leucine zipper protein HOX15                                                  |
| TCONS_00025764 | 0.146312 | -0.225332  | -0.126514  | BGIOSGA004507 | XP_006658180.2PREDICTED: uncharacterized protein LOC102703229, partial                               |
| TCONS_00016371 | 0.146451 | 0.18214    | -0.0922091 | BGIOSGA014597 | XP_006652607.1 E3 ubiquitin-protein ligase BRE1-like 1                                               |
| TCONS_00008800 | 0.146565 | 0.444512   | -1.1872    | BGIOSGA031315 | XP_015689673.1 soluble starch synthase 2-2, chloroplastic/amyloplastic                               |
| TCONS_00012445 | 0.146781 | 0.181172   | -0.762475  | BGIOSGA026404 | XP_003557723.1probable galacturonosyltransferase 11                                                  |
| TCONS_00003656 | 0.146898 | -0.768418  | 0.563287   | BGIOSGA031552 | XP_015699203.1 protein FLUORESCENT IN BLUE LIGHT, chloroplastic-like                                 |
| TCONS_00012684 | 0.147011 | 0.743225   | 0.346      | BGIOSGA035962 | XP_006651586.1 transcription initiation factor TFIIID subunit 8-like                                 |
| TCONS_00031255 | 0.147077 | 0.638116   | -0.90626   | BGIOSGA037352 | XP_006662411.1 protein fluG                                                                          |
| TCONS_00012805 | 0.147077 | 0.223079   | #NA        | #N/A          | #N/A                                                                                                 |
| TCONS_00007576 | 0.147228 | 2.51003    | 0.587548   | BGIOSGA009273 | XP_006647059.1 3-ketoacyl-CoA synthase 11-like                                                       |
| TCONS_00035799 | 0.147237 | 0.542757   | 0.692001   | BGIOSGA021917 | XP_006656637.1 mitogen-activated protein kinase kinase 2 isoform X1                                  |
| TCONS_00005500 | 0.147878 | -0.378804  | -0.330792  | BGIOSGA035867 | XP_006646922.1 thiosulfate/3-mercaptopyruvate sulfurtransferase 1, mitochondrial-like isoform X2     |
| TCONS_00003715 | 0.147911 | 0.520139   | 0.183246   | BGIOSGA011731 | XP_010462583.1 callose synthase 7-like                                                               |
| TCONS_00035408 | 0.147971 | 0.0155056  | 0.229051   | BGIOSGA006740 | XP_015697507.1PREDICTED: uncharacterized protein LOC102703627 isoform X2                             |
| TCONS_00035218 | 0.147971 | #NA        | 0.091547   | BGIOSGA017668 | XP_015690560.1 universal stress protein YxiE-like isoform X3                                         |
| TCONS_00018457 | 0.148028 | 0.154048   | 0.126197   | BGIOSGA018978 | XP_006653939.2 putative ankyrin repeat protein RF_0381                                               |
| TCONS_00007627 | 0.148061 | 0.534451   | 0.397093   | BGIOSGA031963 | XP_015689537.1 serine/threonine protein phosphatase 2A 55 kDa regulatory subunit B beta isoform-like |
| TCONS_00002663 | 0.148153 | -0.273584  | 0.155288   | BGIOSGA002558 | XP_006643642.1 light-mediated development protein DET1                                               |
| TCONS_00026055 | 0.148469 | 0.599372   | 1.32266    | BGIOSGA036477 | XP_006662842.1 phosphoribosylamine--glycine ligase-like isoform X1                                   |
| TCONS_00008450 | 0.148712 | -0.267914  | 0.764727   | BGIOSGA011203 | XP_006647573.1 DEAD-box ATP-dependent RNA helicase 47A                                               |
| TCONS_00025681 | 0.148719 | -0.619982  | 0.380402   | BGIOSGA023742 | XP_006658089.1 xylose isomerase                                                                      |
| TCONS_00000581 | 0.148802 | 1.50869    | 2.00262    | BGIOSGA018778 | XP_006644004.2 importin subunit alpha-1a                                                             |
| TCONS_00009578 | 0.148843 | 4.02824    | 3.41134    | #N/A          | #N/A                                                                                                 |
| TCONS_00005626 | 0.1489   | 0.190395   | 0.445995   | BGIOSGA007739 | XP_006647034.1 DNA damage-inducible protein 1                                                        |
| TCONS_00035886 | 0.148971 | -1.02343   | -1.60561   | BGIOSGA007558 | XP_006663954.1 ribulose biphosphate carboxylase small chain, chloroplastic-like                      |
| TCONS_00017054 | 0.148987 | -1.26415   | 0.137228   | BGIOSGA006773 | XP_006654000.1 phosphoinositide phospholipase C 2-like                                               |
| TCONS_00037067 | 0.149053 | -0.798566  | -2.67029   | BGIOSGA011208 | XP_015695738.1 inositol 2-dehydrogenase                                                              |
| TCONS_00012216 | 0.149309 | 1.02052    | 0.63796    | BGIOSGA010791 | XP_006650047.1 transmembrane protein 87B                                                             |
| TCONS_00021177 | 0.149499 | 0.344623   | -0.226263  | BGIOSGA007031 | XP_006657208.1 CASP-like protein 2C1                                                                 |
| TCONS_00010378 | 0.149547 | -1.47601   | -1.93498   | BGIOSGA012965 | XP_006651544.1 LON peptidase N-terminal domain and RING finger protein 1                             |
| TCONS_00016803 | 0.149685 | -0.0756522 | 0.656314   | BGIOSGA014163 | XP_015692220.1 zinc finger CCHC domain-containing protein 30 isoform X1                              |
| TCONS_00036344 | 0.14969  | 2.21985    | 5.37275    | BGIOSGA032863 | NP_001143921.1uncharacterized protein LOC100276732                                                   |
| TCONS_00004172 | 0.14969  | #NA        | #NA        | BGIOSGA037816 | XP_006657459.2 ubiquitin carboxyl-terminal hydrolase 8                                               |
| TCONS_00016765 | 0.14969  | 0.482885   | #NA        | #N/A          | #N/A                                                                                                 |
| TCONS_00030473 | 0.14969  | 0.634888   | 0.0873507  | #N/A          | #N/A                                                                                                 |
| TCONS_00014910 | 0.149719 | -1.05854   | 0.0252025  | BGIOSGA011908 | XP_006653754.1 serine/threonine-protein kinase CTR1                                                  |
| TCONS_00001931 | 0.149741 | 0.433043   | 1.38516    | BGIOSGA004572 | XP_006644803.1 vacuolar protein sorting-associated protein 28 homolog 1                              |

transcriptome

|                |          |            |            |               |                                                                                |
|----------------|----------|------------|------------|---------------|--------------------------------------------------------------------------------|
| TCONS_00036624 | 0.149968 | 0.532125   | 0.100033   | BGIOSGA036678 | XP_006663183.1 glutamate-rich WD repeat-containing protein 1-like              |
| TCONS_00028776 | 0.149997 | 0.22752    | 0.156527   | BGIOSGA020600 | XP_015694184.1 eukaryotic translation initiation factor 5-like                 |
| TCONS_00011346 | 0.150044 | 0.0928806  | 0.677839   | BGIOSGA031080 | XP_006650905.2 U5 small nuclear ribonucleoprotein 40 kDa protein-like          |
| TCONS_00004789 | 0.150133 | 0.312556   | 0.713152   | BGIOSGA000220 | XP_006645080.1 protein S-acyltransferase 8-like                                |
| TCONS_00001257 | 0.150243 | 0.628759   | -0.103356  | BGIOSGA003885 | XP_010231976.1 protein MARD1                                                   |
| TCONS_00008757 | 0.150286 | 0.128733   | 0.335393   | BGIOSGA005675 | XP_006650330.1 mediator of RNA polymerase II transcription subunit 23          |
| TCONS_00035508 | 0.150327 | -0.384117  | -0.0938859 | BGIOSGA028931 | XP_014757318.1 uncharacterized protein LOC100826700 isoform X3                 |
| TCONS_00030967 | 0.150369 | -0.393158  | 1.09137    | BGIOSGA037473 | XP_015696968.1 mitochondrial import inner membrane translocase subunit TIM22-3 |
| TCONS_00005157 | 0.150403 | 0.603237   | 0.288701   | BGIOSGA000090 | XP_006661738.1 5-oxoprolinase                                                  |
| TCONS_00011993 | 0.150508 | -1.36611   | 1.8927     | BGIOSGA000018 | XP_003558241.1 uncharacterized protein LOC100832493                            |
| TCONS_00029655 | 0.150508 | -1.95107   | 0.0853427  | BGIOSGA003798 | XP_006660448.1 nitrile-specifier protein 5                                     |
| TCONS_00002499 | 0.150827 | -0.12096   | 0.161355   | BGIOSGA022880 | XP_006645312.2 glucan endo-1,3-beta-glucosidase, acidic isoform-like           |
| TCONS_00008092 | 0.150854 | 0.22383    | -0.0970283 | BGIOSGA037753 | XP_006664166.1 gamma-tubulin complex component 5-like isoform X1               |
| TCONS_00012791 | 0.15099  | 0.509885   | 0.989544   | BGIOSGA031175 | XP_006650332.1 histone-binding protein MSI1 homolog                            |
| TCONS_00034592 | 0.151166 | -0.0511068 | 0.241176   | BGIOSGA036028 | XP_006650254.1 protein trichome birefringence-like 14 isoform X1               |
| TCONS_00014404 | 0.151201 | 1.4202     | 0.276659   | BGIOSGA016568 | XP_015691339.1 plant UBX domain-containing protein 4-like                      |
| TCONS_00007190 | 0.151234 | 0.704647   | 0.52658    | BGIOSGA012206 | XP_006649711.1 small nuclear ribonucleoprotein SmD3b-like                      |
| TCONS_00006493 | 0.1513   | -0.367061  | #NA        | BGIOSGA008658 | XP_021313868.1 uncharacterized protein LOC110434333 isoform X1                 |
| TCONS_00035829 | 0.1513   | #NA        | #NA        | BGIOSGA031017 | XP_006660787.1 chitinase-like protein 1                                        |
| TCONS_00010226 | 0.151646 | -0.174642  | -0.124036  | BGIOSGA014071 | XP_015692368.1 cysteine protease ATG4B-like                                    |
| TCONS_00021318 | 0.15174  | -0.348156  | 0.0151113  | BGIOSGA007136 | XP_006656437.1 mitogen-activated protein kinase 4                              |
| TCONS_00016750 | 0.151828 | 1.1013     | -1.08337   | BGIOSGA008814 | XP_008668660.1 glycosyltransferase isoform X1                                  |
| TCONS_00005266 | 0.151937 | 0.17881    | 0.323591   | BGIOSGA004552 | XP_002439211.1 uncharacterized protein LOC8071260                              |
| TCONS_00000622 | 0.152069 | -1.36798   | -0.918495  | BGIOSGA000169 | XP_015696264.1 PREDICTED: uncharacterized protein LOC107304866                 |
| TCONS_00008854 | 0.152069 | -0.367978  | #NA        | BGIOSGA018154 | XP_006647955.1 uncharacterized calcium-binding protein B0563.7-like            |
| TCONS_00023937 | 0.152069 | 1.95395    | 0.88886    | #N/A          | #N/A                                                                           |
| TCONS_00028761 | 0.152069 | 0.632022   | #NA        | #N/A          | #N/A                                                                           |
| TCONS_00017523 | 0.152094 | 0.16828    | 0.740315   | BGIOSGA000544 | XP_015689608.1 coatomer subunit delta-1 isoform X1                             |
| TCONS_00015420 | 0.152156 | 0.587482   | 0.913672   | BGIOSGA033798 | XP_006653188.1 ABC transporter G family member 28-like                         |
| TCONS_00022494 | 0.152354 | -0.198717  | 0.0605397  | BGIOSGA020961 | XP_003563704.1 protein RMD5 homolog                                            |
| TCONS_00024544 | 0.152369 | 0.708522   | 0.321522   | BGIOSGA019943 | XP_015694522.1 PREDICTED: uncharacterized protein LOC102706862, partial        |
| TCONS_00016590 | 0.152441 | 0.149297   | 0.0213949  | BGIOSGA028211 | XP_006652799.1 protein strawberry notch-like                                   |
| TCONS_00023504 | 0.15257  | -0.458651  | -0.614137  | BGIOSGA033493 | XP_008651505.1 regulatory protein isoform X1                                   |
| TCONS_00012620 | 0.152681 | -0.796031  | -0.364202  | BGIOSGA013022 | XP_006651573.1 endoribonuclease Dicer homolog 2a                               |
| TCONS_00010010 | 0.152773 | 1.75664    | 0.844091   | BGIOSGA030655 | XP_008655361.1 ribosome biogenesis protein BMS1 homolog                        |
| TCONS_00014951 | 0.152806 | -0.050703  | -0.985756  | BGIOSGA027930 | XP_015692097.1 probable UDP-arabinose 4-epimerase 2                            |
| TCONS_00001555 | 0.152815 | 1.80106    | 0.0796651  | BGIOSGA004185 | XP_004969515.1 uncharacterized protein LOC101769093                            |
| TCONS_00010107 | 0.152848 | -1.30195   | -1.63536   | BGIOSGA012660 | XP_003557871.1 transcription termination factor MTEF1, chloroplastic           |
| TCONS_00018305 | 0.152854 | #NA        | -1.0707    | BGIOSGA022664 | XP_006654785.1 NAC domain-containing protein 73-like                           |
| TCONS_00020450 | 0.152862 | 0.341147   | 1.30518    | BGIOSGA021098 | XP_015693788.1 tRNA threonylcarbamoyladenine dehydratase                       |
| TCONS_00009467 | 0.153177 | 2.9971     | 0.216932   | BGIOSGA010403 | XP_015690335.1 protein DETOXIFICATION 27-like                                  |
| TCONS_00021781 | 0.153209 | 0.169615   | 0.0571769  | BGIOSGA009348 | XP_006655877.1 sucrose synthase 2                                              |
| TCONS_00008973 | 0.153318 | 0.71862    | 0.301184   | BGIOSGA008949 | XP_015689445.1 transmembrane 9 superfamily member 11-like                      |
| TCONS_00020986 | 0.153377 | -0.789565  | 0.485201   | BGIOSGA026958 | XP_006656208.1 protein OVEREXPRESSION OF CATIONIC PEROXIDASE 3                 |
| TCONS_00015381 | 0.153521 | 0.0696933  | 1.00842    | BGIOSGA029977 | XP_021311222.1 pentatricopeptide repeat-containing protein At2g15690           |
| TCONS_00018669 | 0.153529 | 0.14892    | 0.21909    | BGIOSGA003007 | XP_015692956.1 PREDICTED: uncharacterized protein LOC107304245                 |
| TCONS_00029318 | 0.153538 | 1.95221    | -0.922127  | #N/A          | #N/A                                                                           |
| TCONS_00022646 | 0.153999 | 0.367431   | 0.212005   | BGIOSGA005696 | XP_006656297.1 probable sodium-coupled neutral amino acid transporter 6        |
| TCONS_00008290 | 0.154163 | 1.208      | 1.12237    | BGIOSGA005217 | XP_006647441.1 DNA mismatch repair protein PMS1                                |
| TCONS_00009801 | 0.154211 | 1.18446    | 0.558152   | BGIOSGA014330 | XP_002468067.1 receptor-like protein kinase HERK1                              |
| TCONS_00007443 | 0.154241 | 0.0934114  | 0.575701   | BGIOSGA015278 | XP_003570467.1 transmembrane protein 230                                       |
| TCONS_00007473 | 0.154241 | -1.08423   | -0.637566  | BGIOSGA031885 | NP_001144700.1 uncharacterized protein LOC100277736                            |
| TCONS_00000934 | 0.154241 | -0.0486076 | -0.338908  | BGIOSGA035642 | XP_006644173.1 glutaredoxin-C1                                                 |
| TCONS_00020505 | 0.154241 | 0.214427   | 0.661092   | #N/A          | #N/A                                                                           |
| TCONS_00023173 | 0.154241 | 0.214427   | 0.0761298  | #N/A          | #N/A                                                                           |
| TCONS_00031183 | 0.154308 | -0.635235  | -0.534687  | BGIOSGA009810 | XP_004983051.1 probable NAD(P)H dehydrogenase (quinone) FQR1-like 2            |



## transcriptome

|                |          |            |             |               |                                                                                    |
|----------------|----------|------------|-------------|---------------|------------------------------------------------------------------------------------|
| TCONS_00023610 | 0.154365 | 0.0827001  | 0.292576    | BGIOSGA037193 | XP_015695307.1 endo-1,4-beta-xylanase A-like                                       |
| TCONS_00022405 | 0.154468 | -0.323249  | -0.523444   | BGIOSGA014312 | NP_001147080.1 zinc ion binding protein                                            |
| TCONS_00032591 | 0.154928 | 0.213638   | 0.0744347   | #N/A          | #N/A                                                                               |
| TCONS_00023963 | 0.155232 | -0.3314    | -0.362292   | BGIOSGA025398 | XP_006657877.1 tubulin alpha-3 chain                                               |
| TCONS_00011434 | 0.155595 | 1.62791    | 0.880137    | BGIOSGA031588 | XP_006661929.1 UPF0329 protein                                                     |
| TCONS_00033446 | 0.155595 | 1.79784    | 1.65774     | #N/A          | ECU05_1680/ECU11_0050-like isoform X1                                              |
| TCONS_00010815 | 0.155711 | 0.255059   | -0.44861    | BGIOSGA032204 | XP_006650493.1 phosphoglucomutase, cytoplasmic 2                                   |
| TCONS_00017115 | 0.155867 | -2.03645   | 0.0335703   | BGIOSGA033493 | XP_015692806.1 PREDICTED: putative uncharacterized protein DDB_G0277003 isoform X1 |
| TCONS_00005043 | 0.15596  | 0.189525   | 0.18569     | BGIOSGA035969 | XP_015699239.1 esterase PIR7B-like                                                 |
| TCONS_00009557 | 0.15599  | 0.368304   | 0.559879    | BGIOSGA005244 | XP_006651164.1 probable mitochondrial-processing peptidase subunit beta            |
| TCONS_00008459 | 0.156063 | 0.566586   | -0.615498   | BGIOSGA005968 | XP_015689089.1 ferredoxin-thioredoxin reductase, variable chain-like               |
| TCONS_00021435 | 0.1561   | -1.33614   | -0.601012   | BGIOSGA022117 | XP_006655671.1 plastocyanin, chloroplastic                                         |
| TCONS_00027117 | 0.156195 | 0.830385   | 0.825077    | BGIOSGA026269 | XP_015695451.1 probable rhamnogalacturonate lyase B                                |
| TCONS_00004094 | 0.156243 | #NA        | #NA         | BGIOSGA020405 | XP_010095709.1 hypothetical protein L484_002759                                    |
| TCONS_00027320 | 0.156243 | 0.627177   | 2.07118     | BGIOSGA028484 | XP_004977990.1 UPF0481 protein At3g47200                                           |
| TCONS_00037406 | 0.156243 | -0.372823  | 0.0711755   | BGIOSGA036151 | XP_008465297.1 glycine-rich cell wall structural protein 1.0-like                  |
| TCONS_00009182 | 0.156559 | 0.770172   | 0.133523    | BGIOSGA008273 | XP_006650977.1 WD repeat-containing protein 44-like                                |
| TCONS_00030389 | 0.156665 | -0.139554  | -0.198316   | BGIOSGA021964 | XP_006660862.1 F-box protein PP2-A13                                               |
| TCONS_00003765 | 0.156777 | 1.04961    | 0.44402     | BGIOSGA001440 | XP_006644280.1 ubiquitin carboxyl-terminal hydrolase 6                             |
| TCONS_00018567 | 0.156806 | -0.170962  | 0.888667    | BGIOSGA018865 | XP_003569071.1 DUF724 domain-containing protein 3 isoform X1                       |
| TCONS_00029161 | 0.156821 | -1.14371   | -1.4077     | BGIOSGA030912 | NP_001142366.1 EF hand family                                                      |
| TCONS_00006645 | 0.157083 | 0.174752   | 0.0806921   | BGIOSGA016969 | XP_002454478.1 rho GTPase-activating protein 5                                     |
| TCONS_00015098 | 0.157087 | 0.66541    | 0.606559    | BGIOSGA017280 | XP_006652947.1 PREDICTED: uncharacterized protein LOC102718262                     |
| TCONS_00003710 | 0.15712  | 0.699225   | 0.451983    | BGIOSGA001495 | XP_006644253.2 pre-mRNA-processing protein 40A isoform X1                          |
| TCONS_00002668 | 0.157196 | 0.929301   | 0.709128    | BGIOSGA002554 | XP_006643645.1 uncharacterized sugar kinase slr0537                                |
| TCONS_00011910 | 0.157272 | -2.11858   | -1.03512    | BGIOSGA027463 | XP_004984993.1 nuclear transcription factor Y subunit C-2                          |
| TCONS_00021440 | 0.15736  | -0.247263  | -0.213427   | BGIOSGA022111 | XP_006655677.1 glutamyl-peptide cyclotransferase                                   |
| TCONS_00032750 | 0.157488 | -0.0522922 | 0.238013    | BGIOSGA024412 | XP_015692448.1 PREDICTED: uncharacterized protein LOC102708621                     |
| TCONS_00001087 | 0.157488 | -0.37422   | #NA         | #N/A          | #N/A                                                                               |
| TCONS_00015113 | 0.157505 | -0.841281  | 0.0259894   | BGIOSGA017292 | XP_006652955.1 probable UDP-arabinopyranose mutase 2                               |
| TCONS_00017796 | 0.157539 | -0.064848  | 0.245977    | BGIOSGA019856 | XP_015693221.1 squamosa promoter-binding-like protein 9                            |
| TCONS_00033306 | 0.157564 | -5.9794    | -0.935141   | BGIOSGA032722 | XP_006653690.1 cytochrome P450 87A3-like                                           |
| TCONS_00010425 | 0.157673 | -0.0694119 | -0.3244     | BGIOSGA005422 | XP_006650279.1 cyclin-B1-2                                                         |
| TCONS_00024640 | 0.157796 | -0.804855  | -0.168112   | BGIOSGA035103 | XP_015694802.1 2-oxoisovalerate dehydrogenase subunit beta 1, mitochondrial        |
| TCONS_00021432 | 0.157812 | 0.462892   | 0.204707    | BGIOSGA023655 | XP_006656530.1 tetraspanin-18-like                                                 |
| TCONS_00036854 | 0.157846 | 0.941989   | -0.757889   | BGIOSGA004222 | YP_899414.1 ATP synthase CF1 beta subunit (chloroplast)                            |
| TCONS_00015515 | 0.157984 | -1.60533   | -0.928898   | BGIOSGA020371 | XP_006653226.2 PREDICTED: uncharacterized protein LOC102699500                     |
| TCONS_00021244 | 0.158197 | -2.40913   | -2.64763    | BGIOSGA021758 | XP_006657254.1 glutamate receptor 3.5                                              |
| TCONS_00031169 | 0.158206 | -0.892419  | 0.125618    | BGIOSGA032991 | XP_006662369.1 PREDICTED: uncharacterized protein LOC102716447                     |
| TCONS_00017109 | 0.1585   | 0.535917   | -0.00954616 | BGIOSGA006437 | XP_003568971.1 RNA-binding protein Y14A                                            |
| TCONS_00012231 | 0.158651 | 0.17446    | 1.01872     | BGIOSGA010777 | XP_006651355.1 putative tRNA pseudouridine synthase                                |
| TCONS_00033795 | 0.158667 | -0.375527  | #NA         | BGIOSGA000601 | XP_015697905.1 PREDICTED: uncharacterized protein LOC107305277                     |
| TCONS_00012116 | 0.158667 | -3.18288   | #NA         | BGIOSGA003344 | NP_001131487.1 cAMP-regulated phosphoprotein 19-related protein                    |
| TCONS_00022113 | 0.158667 | #NA        | #NA         | BGIOSGA033307 | XP_015693555.1 very-long-chain 3-oxoacyl-CoA reductase-like protein At1g24470      |
| TCONS_00009789 | 0.158747 | -0.0016721 | 0.120634    | BGIOSGA012342 | XP_015689844.1 PREDICTED: uncharacterized protein LOC102718159                     |
| TCONS_00011257 | 0.158855 | -0.448177  | 0.631935    | BGIOSGA032852 | XP_006650832.1 SPX domain-containing protein 4                                     |
| TCONS_00033140 | 0.158942 | 0.373573   | -0.210397   | BGIOSGA034982 | XP_006663275.1 PREDICTED: uncharacterized protein LOC102706048                     |
| TCONS_00023038 | 0.158954 | 0.189591   | 0.579864    | BGIOSGA025069 | XP_015694459.1 protein HGV2                                                        |
| TCONS_00010770 | 0.159014 | -1.04849   | -0.110704   | BGIOSGA025172 | XP_006650445.1 ethylene-insensitive protein 2-like                                 |
| TCONS_00017458 | 0.159192 | 0.193666   | 0.121171    | BGIOSGA022773 | XP_015693346.1 60S ribosomal protein L15 isoform X3                                |
| TCONS_00034453 | 0.159194 | 0.341746   | 0.853495    | BGIOSGA036521 | XP_015697586.1 probable receptor-like protein kinase At5g56460                     |
| TCONS_00009032 | 0.159309 | 0.57466    | -0.377891   | BGIOSGA005376 | XP_006649161.1 phospholipid--sterol O-acyltransferase                              |
| TCONS_00021286 | 0.159375 | -1.02539   | -0.7657     | BGIOSGA007565 | XP_006656407.1 tyrosine-sulfated glycopeptide receptor 1-like                      |
| TCONS_00015032 | 0.159453 | 1.09948    | -0.0925082  | BGIOSGA017214 | XP_006652891.1 stress enhanced protein 2, chloroplastic                            |
| TCONS_00008314 | 0.159588 | -0.537693  | -0.0596603  | BGIOSGA006101 | XP_010235642.1 protein HHL1, chloroplastic                                         |
| TCONS_00002297 | 0.159788 | -2.96171   | -1.52257    | BGIOSGA038922 | XP_015692159.1 cytochrome c-like                                                   |

transcriptome

|                |          |            |            |               |                                                                                     |
|----------------|----------|------------|------------|---------------|-------------------------------------------------------------------------------------|
| TCONS_00022845 | 0.159907 | 1.06885    | 1.12105    | BGIOSGA033266 | XP_006656432.1 probable protein phosphatase 2C 59                                   |
| TCONS_00015027 | 0.160044 | 0.91668    | 0.477375   | BGIOSGA027564 | XP_006653805.1 DNA polymerase I A, chloroplastic                                    |
| TCONS_00012208 | 0.160074 | 0.0996877  | 0.0982007  | BGIOSGA010798 | XP_006650038.1 PREDICTED: uncharacterized protein LOC102721997 isoform X2           |
| TCONS_00019084 | 0.160263 | 0.49293    | 0.622389   | BGIOSGA018270 | NP_001143959.1 uncharacterized protein LOC100276774                                 |
| TCONS_00005135 | 0.160327 | 1.5402     | 1.41469    | BGIOSGA000072 | XP_006645357.2 mitochondrial import inner membrane translocase subunit tim16-like   |
| TCONS_00036203 | 0.160327 | 0.944592   | 0.0610564  | BGIOSGA036032 | XP_006664626.1 universal stress protein YxiE-like                                   |
| TCONS_00011558 | 0.160479 | -0.0842722 | 0.434586   | BGIOSGA011459 | XP_006649393.1 ankyrin repeat and SOCS box protein 13                               |
| TCONS_00025023 | 0.160595 | 0.167231   | -0.0217728 | BGIOSGA024382 | XP_006657658.1 probable E3 ubiquitin-protein ligase XBOS34                          |
| TCONS_00030201 | 0.160643 | 0.505701   | -0.62064   | BGIOSGA029605 | XP_006660725.2 isoamylase 3, chloroplastic                                          |
| TCONS_00031212 | 0.160798 | 1.05943    | 0.21123    | BGIOSGA004174 | XP_006662392.1 cell division cycle protein 48 homolog                               |
| TCONS_00008274 | 0.160853 | -0.383685  | 0.891633   | BGIOSGA014914 | XP_006647432.1 small nuclear ribonucleoprotein Sm D1                                |
| TCONS_00007439 | 0.160879 | 0.67574    | 0.507175   | BGIOSGA007042 | XP_006646958.1 proline-rich protein PRCC                                            |
| TCONS_00023873 | 0.16096  | 0.603225   | 0.319849   | BGIOSGA033460 | XP_002460828.1 protein IQ-DOMAIN 14                                                 |
| TCONS_00005376 | 0.161132 | 1.23225    | -0.231822  | BGIOSGA020572 | XP_006646863.2 probable histone acetyltransferase HAC-like 1 isoform X1             |
| TCONS_00009172 | 0.16119  | 0.0245197  | 0.537492   | BGIOSGA011699 | XP_006649678.1 thymidine kinase-like                                                |
| TCONS_00008901 | 0.161281 | -1.32729   | -0.171246  | BGIOSGA031562 | XP_006649091.1 kinesin-related protein 4                                            |
| TCONS_00013754 | 0.161334 | 0.155733   | -1.47187   | BGIOSGA011440 | XP_022683825.1 probable inorganic phosphate transporter 1-5                         |
| TCONS_00034577 | 0.161365 | 1.20651    | 0.0584883  | BGIOSGA020798 | XP_015697608.1 probable sucrose-phosphate synthase 5                                |
| TCONS_00022919 | 0.161365 | -0.030528  | 0.68652    | BGIOSGA033392 | XP_006656499.1 NEP1-interacting protein-like 1                                      |
| TCONS_00016674 | 0.161371 | -1.05623   | -0.0736034 | BGIOSGA012967 | XP_006652874.1 G-type lectin S-receptor-like serine/threonine-protein kinase B120   |
| TCONS_00032706 | 0.161402 | -1.06171   | -0.453756  | BGIOSGA027973 | XP_002464930.1 transcription factor MYBS3                                           |
| TCONS_00006452 | 0.161454 | 0.297926   | 1.0742     | BGIOSGA025969 | XP_006647511.1 protein TIC 20-I, chloroplastic-like isoform X2                      |
| TCONS_00024090 | 0.161516 | 0.0802299  | -0.724775  | BGIOSGA025868 | XP_008653340.2 serine/threonine-protein kinase RIPK                                 |
| TCONS_00001365 | 0.161572 | 0.328874   | 0.811878   | BGIOSGA017585 | XP_003575377.139S ribosomal protein L22, mitochondrial                              |
| TCONS_00001570 | 0.161679 | -0.190765  | 0.669201   | BGIOSGA024943 | XP_003569562.1 DNA-directed RNA polymerase III subunit RPC3                         |
| TCONS_00030281 | 0.161731 | -0.126905  | -1.00793   | BGIOSGA021761 | XP_006660780.1 cinnamoyl-CoA reductase 1-like                                       |
| TCONS_00003350 | 0.161866 | -0.378981  | #N/A       | #N/A          | #N/A                                                                                |
| TCONS_00013436 | 0.162134 | -0.359189  | 0.513711   | BGIOSGA017674 | XP_006651480.1 dolichyl-phosphate beta-glucosyltransferase                          |
| TCONS_00015806 | 0.162369 | 1.406      | 0.783852   | BGIOSGA008338 | XP_006652229.2 chaperone protein ClpC1, chloroplastic                               |
| TCONS_00036117 | 0.162458 | 0.502733   | 0.629194   | BGIOSGA011319 | XP_006664064.1 mitochondrial import inner membrane translocase subunit TIM22-3-like |
| TCONS_00013180 | 0.162506 | -0.998031  | -0.26258   | BGIOSGA036962 | XP_003559512.1 protein STRICTOSIDINE SYNTHASE-LIKE 3                                |
| TCONS_00023419 | 0.162704 | -0.994219  | -0.930697  | BGIOSGA009502 | NP_001140513.1 putative cytidine/deoxycytidylate deaminase family protein           |
| TCONS_00025176 | 0.162732 | -2.89556   | -1.64772   | BGIOSGA031102 | XP_006657749.1 anthocyanidin 3-O-glucosyltransferase 2-like                         |
| TCONS_00014614 | 0.162827 | 0.356972   | 1.27727    | BGIOSGA015745 | XP_006652527.2 PREDICTED: uncharacterized protein LOC102710777                      |
| TCONS_00027289 | 0.162827 | 1.42736    | -0.945118  | BGIOSGA027712 | XP_006659087.1 PREDICTED: uncharacterized protein LOC102702399 isoform X2           |
| TCONS_00027044 | 0.162827 | -2.18735   | 0.0548821  | BGIOSGA029099 | XP_006660348.1 putative disease resistance protein RGA4                             |
| TCONS_00036611 | 0.162827 | -0.0320702 | 0.180413   | BGIOSGA034567 | XP_006654114.1 transmembrane protein 230-like isoform X1                            |
| TCONS_00011054 | 0.163061 | -0.419784  | 0.261083   | BGIOSGA034375 | XP_015690956.1 glucose-6-phosphate isomerase, cytosolic B                           |
| TCONS_00018129 | 0.163289 | #N/A       | -1.85315   | BGIOSGA000825 | XP_015692663.1 PREDICTED: uncharacterized protein LOC102699963                      |
| TCONS_00006500 | 0.163289 | #N/A       | -0.94626   | BGIOSGA008666 | XP_014751434.1 photosynthetic NDH subunit of luminal location 3, chloroplastic      |
| TCONS_00033645 | 0.163289 | 0.204484   | 1.37567    | #N/A          | #N/A                                                                                |
| TCONS_00000068 | 0.163443 | -3.65062   | -1.37385   | BGIOSGA017262 | XP_006643667.1 leucine-rich repeat extensin-like protein 3                          |
| TCONS_00029123 | 0.163737 | 2.03409    | 0.789593   | BGIOSGA030874 | XP_015694263.1 PREDICTED: uncharacterized protein LOC107304498                      |
| TCONS_00037464 | 0.163902 | 0.317635   | 1.57931    | BGIOSGA035896 | XP_006664708.1 probable ureidoglycolate hydrolase                                   |
| TCONS_00001924 | 0.164037 | 0.689161   | -0.0091999 | BGIOSGA035727 | XP_006654749.1 vacuole membrane protein KMS1                                        |
| TCONS_00011460 | 0.164173 | -0.381411  | -0.685426  | #N/A          | #N/A                                                                                |
| TCONS_00021834 | 0.164276 | -0.0354416 | 0.146843   | BGIOSGA017184 | XP_006655907.1 PREDICTED: uncharacterized protein LOC102715213                      |
| TCONS_00018646 | 0.164553 | 0.750059   | 1.33163    | BGIOSGA003497 | XP_006655002.1 translocase of chloroplast 159, chloroplastic                        |
| TCONS_00033326 | 0.164596 | 0.203103   | -0.212556  | BGIOSGA006550 | XP_006649469.1 PREDICTED: uncharacterized protein LOC102700314                      |
| TCONS_00024161 | 0.1647   | 0.667118   | 0.595794   | BGIOSGA010644 | XP_006657998.1 transmembrane emp24 domain-containing protein p24delta9-like         |
| TCONS_00021056 | 0.16501  | 1.3712     | 0.207611   | BGIOSGA023284 | XP_006657145.1 bZIP transcription factor 60                                         |
| TCONS_00023638 | 0.165304 | -0.85571   | 0.386456   | BGIOSGA009612 | XP_015694474.1 probable protein S-acyltransferase 12 isoform X3                     |

transcriptome

|                |          |            |            |               |                                                                                         |
|----------------|----------|------------|------------|---------------|-----------------------------------------------------------------------------------------|
| TCONS_00002268 | 0.165414 | #NA        | 2.37036    | BGIOSGA018011 | XP_006645097.1PREDICTED: uncharacterized protein LOC102712313                           |
| TCONS_00001068 | 0.165414 | -0.382726  | -0.536529  | #N/A          | #N/A                                                                                    |
| TCONS_00009454 | 0.165809 | 1.17559    | 0.565915   | BGIOSGA012002 | XP_015690488.1PREDICTED: uncharacterized protein At5g64816                              |
| TCONS_00013382 | 0.165892 | 0.0505747  | 0.394677   | BGIOSGA029786 | XP_006659353.2 pentatricopeptide repeat-containing protein At1g19720                    |
| TCONS_00009785 | 0.166209 | -0.252757  | -1.05895   | BGIOSGA020769 | XP_006649856.1 UDP-glucuronic acid decarboxylase 6                                      |
| TCONS_00008809 | 0.166399 | -0.0287869 | -0.0730294 | BGIOSGA035533 | XP_015689510.1 F-box/kelch-repeat protein At1g74510-like                                |
| TCONS_00036528 | 0.166419 | -1.40082   | -2.5382    | BGIOSGA027711 | XP_009356128.1 protein CHUP1, chloroplastic                                             |
| TCONS_00025898 | 0.166456 | 0.627509   | 0.638683   | BGIOSGA028879 | XP_004972879.1vesicle-associated protein 4-2                                            |
| TCONS_00009218 | 0.166549 | 0.439653   | 0.591856   | BGIOSGA005268 | XP_006650989.1 protein FIZZY-RELATED 2-like                                             |
| TCONS_00020545 | 0.16657  | -1.1913    | -0.76181   | BGIOSGA022713 | XP_022681755.1putative disease resistance protein At1g50180 isoform X3                  |
| TCONS_00035459 | 0.166935 | -0.15301   | -0.893973  | BGIOSGA034031 | XP_002441776.1uncharacterized protein LOC8074828                                        |
| TCONS_00024593 | 0.166935 | -1.9693    | 0.781592   | BGIOSGA035609 | XP_004985802.1uncharacterized protein LOC101763926                                      |
| TCONS_00009930 | 0.167087 | 0.783625   | 0.576849   | BGIOSGA015244 | XP_006647284.1 ras GTPase-activating protein-binding protein 1-like                     |
| TCONS_00023134 | 0.167158 | 0.0488436  | 1.35049    | BGIOSGA028211 | XP_020395849.1uncharacterized protein LOC100037820 isoform X1                           |
| TCONS_00022723 | 0.16721  | 0.347572   | 0.264353   | BGIOSGA000523 | NP_001148233.1FKBP-type peptidyl-prolyl cis-trans isomerase 4                           |
| TCONS_00005766 | 0.167264 | -0.188413  | 0.567507   | BGIOSGA007174 | XP_006657996.1 transcription elongation factor 1 homolog                                |
| TCONS_00013041 | 0.167291 | 0.615284   | 0.043728   | BGIOSGA020918 | XP_006650480.1 chemocyanin-like                                                         |
| TCONS_00007688 | 0.167291 | -1.96968   | -1.54123   | BGIOSGA035627 | XP_006658807.1 protein STRICTOSIDINE SYNTHASE-LIKE 4-like                               |
| TCONS_00017601 | 0.167291 | #NA        | -0.541234  | #N/A          | #N/A                                                                                    |
| TCONS_00025306 | 0.167407 | -1.01857   | 0.367559   | BGIOSGA010658 | XP_008651857.1kinase interacting kinase 1 isoform X1                                    |
| TCONS_00019228 | 0.167413 | 0.801969   | -0.301562  | BGIOSGA020409 | XP_003566295.1phospholipase A1-Igamma1, chloroplastic                                   |
| TCONS_00005367 | 0.16757  | 0.469267   | -0.203611  | BGIOSGA034437 | XP_006646850.2 protein O-linked-mannose beta-1,4-N-acetylglucosaminyltransferase 2-like |
| TCONS_00031708 | 0.167638 | 0.714448   | 0.235496   | BGIOSGA015558 | XP_006661596.2 notchless protein homolog                                                |
| TCONS_00008549 | 0.167638 | #NA        | 0.457888   | BGIOSGA031177 | XP_006647659.1PREDICTED: uncharacterized protein LOC102704488                           |
| TCONS_00006152 | 0.167664 | 0.727751   | 0.490888   | BGIOSGA004827 | XP_003569904.1protein PAT1 homolog 1                                                    |
| TCONS_00005796 | 0.167977 | -1.38545   | 0.0419932  | BGIOSGA002171 | XP_015689205.1PREDICTED: uncharacterized protein LOC107303658                           |
| TCONS_00017684 | 0.168026 | 0.0178624  | -0.0341318 | BGIOSGA011739 | XP_006654327.1 nascent polypeptide-associated complex subunit alpha-like protein        |
| TCONS_00025073 | 0.168292 | -0.719845  | -2.36107   | BGIOSGA030920 | XP_004957035.1probable tuliposide A-converting enzyme b6, amyloplastic                  |
| TCONS_00006826 | 0.168307 | 2.31689    | 1.15436    | BGIOSGA009001 | XP_015688963.1PREDICTED: uncharacterized protein LOC102713443 isoform X1                |
| TCONS_00019353 | 0.168307 | -0.648842  | 1.15663    | BGIOSGA017995 | XP_006658042.1 pre-mRNA-splicing factor SYF1                                            |
| TCONS_00003485 | 0.168307 | 0.508416   | 0.581259   | BGIOSGA024654 | XP_006644140.1 putative disease resistance RPP13-like protein 3                         |
| TCONS_00015097 | 0.168465 | -0.884626  | -0.0176109 | BGIOSGA001086 | XP_006652946.1 putative glucose-6-phosphate 1-epimerase                                 |
| TCONS_00013558 | 0.168568 | 0.454759   | 0.616596   | BGIOSGA020488 | XP_006650917.1 PAX3- and PAX7-binding protein 1                                         |
| TCONS_00025419 | 0.168629 | 0.185192   | 0.527458   | BGIOSGA017876 | XP_015695163.1 WRKY transcription factor SUSIBA2-like                                   |
| TCONS_00007510 | 0.16863  | -2.38616   | 0.36226    | BGIOSGA018030 | XP_015689193.1 basic leucine zipper 1-like                                              |
| TCONS_00032076 | 0.168757 | 1.31443    | 1.03833    | BGIOSGA032061 | XP_006661720.1 glutamate--tRNA ligase, cytoplasmic-like                                 |
| TCONS_00024993 | 0.168834 | -2.53968   | -0.856691  | BGIOSGA024119 | XP_006664834.1 probable cellulose synthase A catalytic subunit 3 [UDP-forming]          |
| TCONS_00029448 | 0.168944 | #NA        | #NA        | BGIOSGA029334 | XP_006660936.1 auxin-responsive protein SAUR36-like                                     |
| TCONS_00004986 | 0.169212 | -0.4087    | -0.288896  | BGIOSGA004699 | XP_004971088.1F-box protein At1g67340                                                   |
| TCONS_00004132 | 0.169242 | -0.0769129 | -0.0312193 | BGIOSGA010966 | XP_004969524.2protein ATAF2                                                             |
| TCONS_00030090 | 0.169252 | #NA        | #NA        | BGIOSGA029710 | XP_006661260.1 zinc finger protein 2-like                                               |
| TCONS_00029429 | 0.169554 | 0.197805   | 1.54048    | BGIOSGA029129 | XP_015696635.1PREDICTED: uncharacterized protein LOC107304960                           |
| TCONS_00012149 | 0.169618 | -0.429238  | -0.450867  | BGIOSGA017483 | XP_015691133.1 protein REDUCED WALL ACETYLATION 1-like isoform X1                       |
| TCONS_00020669 | 0.169884 | -0.0213875 | -0.339763  | BGIOSGA008018 | XP_003563824.1eukaryotic translation initiation factor 1A                               |
| TCONS_00012581 | 0.169932 | 0.587781   | -0.703156  | BGIOSGA024966 | XP_004982535.1protein DETOXIFICATION 40                                                 |
| TCONS_00008678 | 0.170138 | 0.612211   | 0.358424   | BGIOSGA029415 | XP_002452661.1uncharacterized protein LOC8073839                                        |
| TCONS_00001372 | 0.17019  | 0.909475   | 0.997245   | BGIOSGA024643 | XP_006646108.1 DEAD-box ATP-dependent RNA helicase 25                                   |
| TCONS_00026267 | 0.170422 | 0.781829   | 1.03578    | BGIOSGA004920 | XP_006659261.1 probable DNA replication complex GINS protein PSF3                       |
| TCONS_00009623 | 0.170422 | 1.07134    | 1.73622    | #N/A          | #N/A                                                                                    |
| TCONS_00030881 | 0.170616 | -4.53078   | -1.45592   | BGIOSGA035935 | XP_006661696.2 flavonoid 3'-monooxygenase-like                                          |
| TCONS_00004370 | 0.170698 | -1.12536   | -0.286849  | BGIOSGA030759 | XP_003569775.2uncharacterized protein LOC100824998                                      |
| TCONS_00014133 | 0.17097  | 2.41866    | -0.550569  | BGIOSGA007382 | XP_003579626.1probable metal-nicotianamine transporter YSL6                             |
| TCONS_00026940 | 0.17097  | -0.38869   | -0.702572  | BGIOSGA012463 | XP_006659583.1 calvin cycle protein CP12-3, chloroplastic-like                          |
| TCONS_00007541 | 0.17097  | #NA        | 1.25679    | BGIOSGA017413 | NP_001145103.1uncharacterized protein LOC100278318                                      |

transcriptome

|                |          |            |           |               |                                                                                                            |
|----------------|----------|------------|-----------|---------------|------------------------------------------------------------------------------------------------------------|
| TCONS_00021005 | 0.171399 | 0.192191   | -0.536912 | BGIOSGA023236 | XP_006656224.2 glucan endo-1,3-beta-glucosidase 14                                                         |
| TCONS_00034791 | 0.171495 | 0.610739   | -0.551895 | BGIOSGA012000 | XP_004972914.1 DIMBOA UDP-glucosyltransferase BX8                                                          |
| TCONS_00020032 | 0.171495 | 1.93267    | 3.30609   | BGIOSGA012251 | XP_006655729.1 PREDICTED: uncharacterized protein LOC102710500                                             |
| TCONS_00023081 | 0.171495 | -1.38926   | -0.966933 | #N/A          | #N/A                                                                                                       |
| TCONS_00031560 | 0.171749 | 0.48493    | 0.447463  | BGIOSGA021607 | XP_015697456.1 pentatricopeptide repeat-containing protein At1g08070, chloroplastic-like                   |
| TCONS_00015190 | 0.171998 | 0.800014   | -0.110222 | BGIOSGA008693 | XP_006653041.1 elicitor-responsive protein 3-like                                                          |
| TCONS_00012519 | 0.171998 | -1.97477   | -0.553166 | #N/A          | #N/A                                                                                                       |
| TCONS_00009223 | 0.172147 | 1.28557    | 0.221164  | BGIOSGA012562 | XP_006650992.1 probable receptor-like protein kinase At5g24010                                             |
| TCONS_00030539 | 0.172211 | -1.04768   | -1.7697   | BGIOSGA013107 | NP_001148278.1 thiol protease SEN102 precursor                                                             |
| TCONS_00004025 | 0.172241 | -0.0115663 | 0.0784868 | #N/A          | #N/A                                                                                                       |
| TCONS_00012408 | 0.172304 | -0.413817  | -0.581024 | BGIOSGA017414 | XP_006650173.1 1-phosphatidylinositol-3-phosphate 5-kinase FAB1A-like                                      |
| TCONS_00004206 | 0.172478 | 0.527197   | -0.139347 | BGIOSGA000996 | XP_006644552.2 PREDICTED: uncharacterized protein LOC102717385 isoform X1                                  |
| TCONS_00026948 | 0.172478 | 0.609659   | 1.03058   | BGIOSGA008168 | XP_022681835.1 glutathione S-transferase T3-like                                                           |
| TCONS_00023795 | 0.172478 | -0.0277708 | 0.223223  | BGIOSGA024375 | XP_004984875.160S ribosomal protein L44                                                                    |
| TCONS_00004139 | 0.172478 | -0.712269  | 1.40909   | BGIOSGA035645 | XP_003569532.1 monothiol glutaredoxin-S5                                                                   |
| TCONS_00002552 | 0.17271  | -1.3906    | -0.970013 | BGIOSGA019782 | XP_015697046.1 PREDICTED: uncharacterized protein LOC107305075                                             |
| TCONS_00030897 | 0.17271  | 1.51629    | 1.67384   | #N/A          | #N/A                                                                                                       |
| TCONS_00011239 | 0.172937 | #N/A       | -1.97059  | BGIOSGA005135 | XP_002443307.1 putative disease resistance protein RGA1                                                    |
| TCONS_00037034 | 0.173137 | 0.921915   | -0.401476 | BGIOSGA037260 | XP_006663954.1 ribulose bisphosphate carboxylase small chain, chloroplastic-like                           |
| TCONS_00039026 | 0.173159 | 0.193858   | -0.386198 | BGIOSGA010143 | XP_015689993.1 GTPase LSG1-1-like                                                                          |
| TCONS_00010436 | 0.17328  | 0.755619   | 0.875539  | BGIOSGA013028 | XP_015691311.1 DNA-binding protein SMUBP-2 isoform X2                                                      |
| TCONS_00035632 | 0.173568 | 0.574377   | 0.356188  | BGIOSGA037052 | XP_006664369.1 nuclear pore complex protein NUP98A                                                         |
| TCONS_00018358 | 0.173591 | 0.655715   | 0.490083  | BGIOSGA000520 | XP_006643766.1 histone H2B.5                                                                               |
| TCONS_00006768 | 0.173631 | 1.0395     | 0.708721  | BGIOSGA021368 | XP_006648996.2 PHD finger protein At3g20280-like                                                           |
| TCONS_00020851 | 0.173633 | 1.22568    | 1.27653   | BGIOSGA023058 | XP_015693606.1 polyadenylate-binding protein-interacting protein 11-like                                   |
| TCONS_00036426 | 0.173758 | -0.301612  | 0.839408  | BGIOSGA025218 | XP_024312685.1 wall-associated receptor kinase 5 isoform X1                                                |
| TCONS_00002146 | 0.173938 | 0.713956   | 0.562815  | BGIOSGA003060 | XP_006644989.1 myb-related protein B                                                                       |
| TCONS_00016790 | 0.173949 | 0.564845   | 0.524397  | BGIOSGA009765 | XP_006652956.1 MAP3K epsilon protein kinase 1-like isoform X2                                              |
| TCONS_00011692 | 0.174103 | -0.159768  | -0.67568  | BGIOSGA007056 | NP_001306702.1 MADS-box transcription factor 47                                                            |
| TCONS_00009838 | 0.174209 | -0.84232   | -0.300476 | BGIOSGA012390 | XP_006651273.1 rhodanese-like domain-containing protein 10                                                 |
| TCONS_00022699 | 0.174213 | 0.813349   | 0.588995  | BGIOSGA020744 | XP_006656331.1 V-type proton ATPase catalytic subunit A                                                    |
| TCONS_00035488 | 0.174407 | -1.19987   | 0.0256734 | BGIOSGA034697 | XP_006663167.1 bis(5'-adenosyl)-triphosphatase-like                                                        |
| TCONS_00020666 | 0.174602 | -2.71466   | 0.288217  | BGIOSGA012501 | XP_006656950.2 PREDICTED: uncharacterized protein LOC102711358                                             |
| TCONS_00002118 | 0.174602 | 1.2187     | 0.44022   | BGIOSGA017891 | XP_006644960.1 PREDICTED: uncharacterized protein At4g08330, chloroplastic-like                            |
| TCONS_00032077 | 0.174602 | -1.71466   | -0.296746 | BGIOSGA034221 | XP_004985376.1 putative yippee-like protein Os10g0369500                                                   |
| TCONS_00004279 | 0.174742 | -0.667364  | -1.14297  | BGIOSGA000926 | XP_006646257.2 PREDICTED: uncharacterized protein LOC102714525                                             |
| TCONS_00023516 | 0.17515  | 0.300985   | 0.26094   | BGIOSGA025549 | XP_006657641.1 F-box-like/WD repeat-containing protein TBL1XR1                                             |
| TCONS_00006821 | 0.175162 | -0.808408  | -0.266825 | BGIOSGA016319 | XP_006647851.1 nudix hydrolase 21, chloroplastic                                                           |
| TCONS_00001672 | 0.17541  | 0.0761993  | -0.346216 | BGIOSGA004307 | XP_006646255.2 5'-nucleotidase SurE                                                                        |
| TCONS_00007315 | 0.175472 | -0.153711  | 0.364894  | BGIOSGA007169 | XP_006646851.1 PREDICTED: uncharacterized protein LOC102702068 isoform X2                                  |
| TCONS_00033376 | 0.175507 | -1.33086   | -2.16978  | BGIOSGA035199 | XP_015697756.1 mitochondrial dicarboxylate/tricarboxylate transporter DTC-like                             |
| TCONS_00014520 | 0.175518 | -0.393779  | 1.4379    | BGIOSGA016683 | XP_003580054.3 uncharacterized protein LOC100842706                                                        |
| TCONS_00028602 | 0.17569  | 1.19098    | 1.02243   | BGIOSGA028486 | XP_003573407.1 D-aminoacyl-tRNA deacylase isoform X3                                                       |
| TCONS_00010511 | 0.17569  | -0.616372  | 0.384997  | #N/A          | #N/A                                                                                                       |
| TCONS_00024152 | 0.17569  | #N/A       | 0.0224264 | #N/A          | #N/A                                                                                                       |
| TCONS_00029658 | 0.175714 | 0.915741   | 0.566283  | BGIOSGA030162 | XP_006660451.1 serine/threonine-protein phosphatase 2A 65 kDa regulatory subunit A beta isoform isoform X1 |
| TCONS_00016219 | 0.175756 | -0.372488  | 0.380968  | BGIOSGA009289 | XP_015692099.1 CLIP-associated protein-like                                                                |
| TCONS_00013717 | 0.17586  | 0.70536    | 0.214642  | BGIOSGA015878 | XP_006653159.1 mitochondrial inner membrane protease subunit 2-like isoform X2                             |
| TCONS_00027630 | 0.17586  | 0.53871    | -1.43743  | BGIOSGA019780 | XP_015696083.1 afadin- and alpha-actinin-binding protein-like isoform X2                                   |
| TCONS_00017324 | 0.17586  | 0.383432   | 0.799604  | BGIOSGA028567 | XP_006654151.1 nudix hydrolase 15, mitochondrial-like                                                      |
| TCONS_00010588 | 0.175973 | -1.25067   | 0.0411698 | BGIOSGA013201 | XP_006650338.1 mediator of RNA polymerase II transcription subunit 19a-like isoform X2                     |
| TCONS_00009642 | 0.176188 | 0.453437   | -2.30077  | BGIOSGA017720 | XP_006651196.1 non-symbiotic hemoglobin 2-like                                                             |
| TCONS_00015805 | 0.176217 | -0.308543  | 0.308821  | BGIOSGA034171 | XP_006652229.2 chaperone protein ClpC1, chloroplastic                                                      |
| TCONS_00007393 | 0.176299 | 1.348      | 0.31867   | BGIOSGA026264 | NP_001278542.1 COX VIIa-like protein                                                                       |

transcriptome

|                |          |            |            |               |                                                                                                        |
|----------------|----------|------------|------------|---------------|--------------------------------------------------------------------------------------------------------|
| TCONS_00004581 | 0.176348 | 0.54746    | 0.171246   | BGIOSGA000633 | XP_006644865.1 50S ribosomal protein L34, chloroplastic                                                |
| TCONS_00030233 | 0.176505 | 1.43514    | -0.564607  | BGIOSGA029573 | XP_002462551.1 uncharacterized protein LOC8063765                                                      |
| TCONS_00007730 | 0.176505 | -1.39493   | -0.979645  | BGIOSGA031913 | XP_021317282.1 uncharacterized protein LOC8074381 isoform X2                                           |
| TCONS_00035455 | 0.176569 | 0.282455   | 0.473181   | BGIOSGA036733 | XP_006663737.1 PREDICTED: uncharacterized protein LOC102701873                                         |
| TCONS_00005064 | 0.176659 | -4.56504   | -1.14996   | BGIOSGA008953 | XP_015697232.1 PREDICTED: uncharacterized protein LOC107305119                                         |
| TCONS_00007158 | 0.1767   | 0.55032    | 0.36783    | BGIOSGA019729 | XP_015689288.1 PREDICTED: uncharacterized protein LOC102706919                                         |
| TCONS_00002218 | 0.177249 | 0.381797   | 0.381035   | BGIOSGA002421 | XP_003567296.1 transcription factor DIVARICATA XP_023157553.1 E3 ubiquitin-protein ligase Os04g0509000 |
| TCONS_00034089 | 0.177249 | -0.395811  | #NA        | BGIOSGA005460 | NP_001148446.1 cp protein                                                                              |
| TCONS_00009546 | 0.177249 | -3.03967   | #NA        | BGIOSGA012091 | XP_006660738.1 basic leucine zipper 43-like                                                            |
| TCONS_00030214 | 0.177249 | -1.39581   | -1.98154   | BGIOSGA035772 | XP_006652595.1 homeobox-leucine zipper protein HOX22-like                                              |
| TCONS_00014681 | 0.177325 | -0.343407  | -0.757163  | BGIOSGA029853 | XP_015693254.1 zinc finger AN1 domain-containing stress-associated protein 15                          |
| TCONS_00019014 | 0.17739  | -0.495514  | -0.801321  | BGIOSGA028955 | XP_004958088.1 organic cation/carnitine transporter 7                                                  |
| TCONS_00025384 | 0.177537 | -0.301052  | -0.491716  | BGIOSGA013190 | XP_015688826.1 PREDICTED: uncharacterized protein At5g41620-like                                       |
| TCONS_00005800 | 0.177572 | 0.0877652  | 0.49475    | BGIOSGA016804 | XP_015690757.1 protein TORNADO 1 isoform X1                                                            |
| TCONS_00010968 | 0.177664 | -0.0752354 | 0.586267   | BGIOSGA013568 | XP_006647106.1 U2 small nuclear ribonucleoprotein A'                                                   |
| TCONS_00007664 | 0.177694 | 0.104518   | 0.179641   | BGIOSGA006822 | XP_006648266.2 cyclin-P4-1-like                                                                        |
| TCONS_00005320 | 0.17806  | -2.64471   | -2.64656   | BGIOSGA035361 | XP_006647397.1 probable nucleoside diphosphate kinase 5                                                |
| TCONS_00006289 | 0.178313 | -0.577658  | 0.513266   | BGIOSGA008450 | XP_006647956.1 cell number regulator 1-like                                                            |
| TCONS_00006916 | 0.178313 | -0.882513  | 0.0157661  | BGIOSGA009518 | XP_015690560.1 universal stress protein YxiE-like isoform X3                                           |
| TCONS_00012119 | 0.178313 | #NA        | 2.60073    | BGIOSGA020051 | XP_015695558.1 aberrant root formation protein 4                                                       |
| TCONS_00027741 | 0.178359 | -0.702948  | 0.303313   | BGIOSGA027260 | XP_006650674.1 PREDICTED: uncharacterized protein LOC102719752                                         |
| TCONS_00013263 | 0.178557 | 0.602618   | 0.52972    | BGIOSGA009724 | XP_006650725.1 B11-like protein                                                                        |
| TCONS_00013335 | 0.178568 | 0.565998   | -0.139358  | BGIOSGA009646 | XP_006646628.1 protein DEK-like                                                                        |
| TCONS_00002444 | 0.178625 | 0.839665   | 0.567188   | BGIOSGA005087 |                                                                                                        |
| TCONS_00032592 | 0.17871  | 0.629203   | 0.459039   | BGIOSGA031184 | XP_015697363.1 phospholipase D gamma 1-like                                                            |
| TCONS_00008543 | 0.17891  | 1.60219    | 0.751222   | BGIOSGA004372 | XP_004960887.1 NADP-dependent malic enzyme, chloroplastic                                              |
| TCONS_00015000 | 0.17891  | -0.39781   | 0.133555   | BGIOSGA017191 | XP_006653793.1 peroxisome biogenesis protein 22                                                        |
| TCONS_00014505 | 0.179273 | 0.822666   | 1.08144    | BGIOSGA016670 | XP_006652453.1 eIF-2-alpha kinase GCN2 isoform X1                                                      |
| TCONS_00000496 | 0.179393 | 0.500381   | 0.108592   | BGIOSGA017448 | XP_006643947.1 casein kinase I-like isoform X2                                                         |
| TCONS_00023760 | 0.179567 | -1.84607   | -0.0363103 | BGIOSGA025789 | XP_006646828.1 dnaJ homolog subfamily B member 1-like                                                  |
| TCONS_00017536 | 0.179615 | 0.813515   | 0.0839753  | BGIOSGA034885 | XP_015693213.1 long chain acyl-CoA synthetase 8                                                        |
| TCONS_00006606 | 0.179769 | 0.530899   | -0.667454  | BGIOSGA031177 | XP_006647654.1 aquaporin PIP1-1                                                                        |
| TCONS_00027347 | 0.179773 | -0.176471  | 0.681932   | BGIOSGA014082 | XP_008680222.2 probable chromatin-remodeling complex ATPase chain                                      |
| TCONS_00015890 | 0.179972 | 1.09122    | 0.477242   | BGIOSGA015099 | XP_006652290.1 COP9 signalosome complex subunit 8                                                      |
| TCONS_00025365 | 0.180129 | 0.68031    | 0.565854   | BGIOSGA010746 | XP_006657855.1 PREDICTED: uncharacterized protein LOC102706861                                         |
| TCONS_00000764 | 0.180166 | -0.261845  | 0.496518   | BGIOSGA002775 | XP_012701322.1 RING-H2 finger protein ATL3                                                             |
| TCONS_00002646 | 0.18026  | 0.40789    | -0.989147  | BGIOSGA009557 | XP_008674049.1 protein SODIUM POTASSIUM ROOT DEFECTIVE 1                                               |
| TCONS_00005988 | 0.18026  | 2.55473    | 0.332781   | BGIOSGA016611 | XP_003573046.1 eukaryotic translation initiation factor 4B3                                            |
| TCONS_00020010 | 0.18026  | -1.62186   | -0.796502  | BGIOSGA029432 | NP_001130976.1 harpin-induced 1                                                                        |
| TCONS_00005603 | 0.180468 | 0.591796   | -0.0173924 | #N/A          | XP_015689301.1 methyl-CpG-binding domain-containing protein 9                                          |
| TCONS_00016729 | 0.180536 | #NA        | -0.989841  | BGIOSGA029257 | XP_015691930.1 VQ motif-containing protein 31                                                          |
| TCONS_00010294 | 0.180666 | -0.502495  | 0.130813   | BGIOSGA039220 | XP_006651499.1 glucose-6-phosphate 1-dehydrogenase, chloroplastic-like                                 |
| TCONS_00011431 | 0.180771 | -0.151782  | 0.226496   | BGIOSGA011593 | XP_006650967.2 folylpolyglutamate synthase-like                                                        |
| TCONS_00028104 | 0.180885 | 0.599759   | 1.00928    | BGIOSGA029700 | XP_006662238.1 AT-rich interactive domain-containing protein 4-like                                    |
| TCONS_00033844 | 0.180885 | -0.198607  | 0.210914   | BGIOSGA035615 | XP_015697532.1 PREDICTED: uncharacterized protein LOC102701767                                         |
| TCONS_00012735 | 0.180899 | 0.253436   | 0.222152   | BGIOSGA010231 | XP_003580705.1 SEC1 family transport protein SLY1                                                      |
| TCONS_00020888 | 0.180969 | #NA        | -1.21332   | BGIOSGA007902 | XP_006656168.1 abscisic acid receptor PYL2                                                             |
| TCONS_00023181 | 0.181208 | -1.2489    | -0.453907  | BGIOSGA025221 | XP_006657488.1 PREDICTED: uncharacterized protein LOC102718936, partial                                |
| TCONS_00025408 | 0.181294 | -1.98571   | #NA        | #N/A          | #N/A                                                                                                   |
| TCONS_00011384 | 0.181362 | -0.151209  | 0.240334   | BGIOSGA009390 | XP_006650935.1 transcriptional corepressor LEUNIG_HOMOLOG-like isoform X2                              |
| TCONS_00013355 | 0.181435 | 0.0717926  | -1.16211   | BGIOSGA017005 | XP_006650741.1 thioredoxin H2-2                                                                        |
| TCONS_00014057 | 0.181526 | 0.0139945  | -0.136727  | BGIOSGA015413 | XP_006653303.1 reticulon-like protein B12                                                              |
| TCONS_00032053 | 0.181601 | -2.9861    | -0.577489  | BGIOSGA031430 | XP_004983255.1 uncharacterized protein LOC101781197 isoform X2                                         |
| TCONS_00009487 | 0.181601 | -0.164098  | -0.477954  | BGIOSGA035939 | XP_006649553.1 N-acetyltransferase 9-like protein isoform X2                                           |
| TCONS_00013080 | 0.181601 | -2.72307   | -0.5071    | #N/A          | #N/A                                                                                                   |

transcriptome

|                |          |            |             |               |                                                                                       |
|----------------|----------|------------|-------------|---------------|---------------------------------------------------------------------------------------|
| TCONS_00000661 | 0.181609 | 0.410211   | 0.268586    | BGIOSGA003249 | XP_006644055.1 isocitrate dehydrogenase [NAD] catalytic subunit 5, mitochondrial-like |
| TCONS_00005279 | 0.181672 | 0.0378914  | -0.131367   | BGIOSGA007386 | XP_006648233.1 protein LOW PSII ACCUMULATION 3, chloroplastic                         |
| TCONS_00019313 | 0.181893 | -0.401504  | 0.743705    | BGIOSGA025424 | XP_006648657.2 coiled-coil domain-containing protein 177-like                         |
| TCONS_00038843 | 0.181893 | -1.05358   | -0.130765   | BGIOSGA036031 | XP_006663112.1 disease resistance protein RPM1-like isoform X2                        |
| TCONS_00016854 | 0.181893 | 3.10946    | 1.5917      | #N/A          | #N/A                                                                                  |
| TCONS_00035018 | 0.181948 | -0.395862  | 0.192323    | BGIOSGA006464 | XP_015698155.1 centromere/kinetochore protein zwT0 homolog                            |
| TCONS_00003399 | 0.181964 | -0.401592  | 0.369131    | BGIOSGA022008 | XP_020405347.1PIT1 isoform X1                                                         |
| TCONS_00026056 | 0.182127 | -1.25045   | -0.67677    | BGIOSGA028123 | XP_015696079.1 starch synthase 3, chloroplastic/amyloplastic-like isoform X1          |
| TCONS_00034258 | 0.182237 | -0.209292  | -1.21652    | BGIOSGA034537 | XP_006664852.2 phosphoglycerate mutase-like protein 4                                 |
| TCONS_00028068 | 0.182237 | -2.9869    | -0.994126   | #N/A          | #N/A                                                                                  |
| TCONS_00016614 | 0.182303 | 1.18294    | 0.268742    | BGIOSGA010113 | XP_004976810.1 uncharacterized protein At4g15545                                      |
| TCONS_00002027 | 0.182368 | 0.45772    | 0.460109    | BGIOSGA000417 | XP_006644878.1 PREDICTED: uncharacterized protein LOC102719437                        |
| TCONS_00024315 | 0.182368 | 1.19555    | 0.331896    | BGIOSGA018180 | XP_006658949.2 PREDICTED: uncharacterized protein LOC102703417                        |
| TCONS_00005946 | 0.182433 | -0.987147  | -0.42204    | BGIOSGA009442 | XP_004952370.1B-cell receptor-associated protein 31                                   |
| TCONS_00002279 | 0.182497 | 1.14522    | 0.764213    | BGIOSGA004916 | XP_003561922.1dirigent protein 8                                                      |
| TCONS_00002906 | 0.182744 | -0.126943  | -1.65836    | BGIOSGA002313 | XP_022682852.1 uncharacterized protein LOC101753820                                   |
| TCONS_00012543 | 0.182864 | 2.13332    | 0.267335    | BGIOSGA010439 | XP_003561920.2 uncharacterized protein LOC100829561                                   |
| TCONS_00024076 | 0.182864 | 0.174581   | 0.216845    | BGIOSGA026111 | XP_021308682.1 stress-response A/B barrel domain-containing protein UP3               |
| TCONS_00018257 | 0.182922 | -0.372429  | 0.177485    | BGIOSGA002450 | XP_008649964.1 peptidyl-tRNA hydrolase, mitochondrial isoform X2                      |
| TCONS_00004512 | 0.182922 | 0.394381   | 0.223163    | BGIOSGA020136 | XP_006644802.1 protein ULTRAPETALA 1-like isoform X2                                  |
| TCONS_00036746 | 0.183054 | 0.822604   | -0.0651905  | BGIOSGA036568 | XP_006663852.1 WD repeat-containing protein 48                                        |
| TCONS_00024397 | 0.183205 | 1.31673    | 0.308299    | BGIOSGA029631 | XP_002461259.1 probable protein phosphatase 2C 33 isoform X2                          |
| TCONS_00009503 | 0.183367 | 0.0913985  | 0.128569    | BGIOSGA037468 | XP_006651138.1 protein CLT2, chloroplastic-like isoform X1                            |
| TCONS_00033308 | 0.183524 | -4.104     | -2.11283    | BGIOSGA026786 | XP_006647933.2 uclacyanin-3-like                                                      |
| TCONS_00026818 | 0.183625 | -0.0317244 | 0.869126    | #N/A          | #N/A                                                                                  |
| TCONS_00024430 | 0.183675 | -0.0925547 | -0.229058   | BGIOSGA024978 | XP_004987271.1 DDRGK domain-containing protein 1                                      |
| TCONS_00034656 | 0.183774 | 0.50301    | -0.413016   | BGIOSGA034172 | XP_015698066.1 PREDICTED: uncharacterized protein LOC102705200 isoform X2             |
| TCONS_00010195 | 0.183822 | 0.110631   | -0.142489   | BGIOSGA012761 | XP_006651443.2 probable F-actin-capping protein subunit beta                          |
| TCONS_00014874 | 0.183822 | 0.259023   | -0.775707   | BGIOSGA017810 | XP_006652754.2 myb family transcription factor APL-like                               |
| TCONS_00033243 | 0.183822 | 0.454039   | -0.538667   | BGIOSGA019279 | XP_004955354.1 putative disease resistance RPP13-like protein 3                       |
| TCONS_00025642 | 0.183848 | 0.341351   | -1.45055    | BGIOSGA023722 | XP_003559858.1 ferredoxin-dependent glutamate synthase, chloroplastic                 |
| TCONS_00024471 | 0.183917 | -1.47445   | -1.5833     | BGIOSGA024927 | XP_006658228.1 probable N-acetyltransferase HLS1                                      |
| TCONS_00003385 | 0.18401  | -0.543156  | -0.291351   | BGIOSGA019123 | XP_006644100.1 PREDICTED: uncharacterized protein LOC102699440 isoform X1             |
| TCONS_00031572 | 0.184234 | -0.798127  | -0.707666   | BGIOSGA019155 | XP_006662017.1 chitinase 8                                                            |
| TCONS_00020793 | 0.18432  | -1.21193   | 0.410531    | BGIOSGA006739 | XP_006656122.1 plastid division protein PDV1-like                                     |
| TCONS_00019672 | 0.18432  | 0.57728    | 0.322583    | BGIOSGA015227 | XP_002441426.1 ER lumen protein-retaining receptor A                                  |
| TCONS_00011360 | 0.184405 | -0.40468   | 0.348367    | BGIOSGA025981 | XP_015690154.1 PREDICTED: uncharacterized protein LOC102712522                        |
| TCONS_00021714 | 0.184475 | 0.127207   | 1.50993     | BGIOSGA025459 | XP_002437933.1 vesicle-associated membrane protein 711                                |
| TCONS_00027708 | 0.184587 | 1.1547     | 0.963906    | BGIOSGA036755 | XP_015695556.1 probable WRKY transcription factor 32                                  |
| TCONS_00007853 | 0.184879 | 0.372329   | 0.513834    | BGIOSGA006628 | XP_006647197.1 PREDICTED: uncharacterized protein LOC102711222                        |
| TCONS_00013342 | 0.184952 | -0.509208  | 0.84038     | BGIOSGA009639 | XP_015690257.1 tryptophan synthase alpha chain-like                                   |
| TCONS_00017934 | 0.185096 | 0.209157   | 0.0861828   | BGIOSGA034427 | XP_003568316.1 probable protein S-acyltransferase 16                                  |
| TCONS_00002731 | 0.185165 | -0.405641  | -1.17138    | BGIOSGA026844 | XP_015688077.1 CAX-interacting protein 4                                              |
| TCONS_00032290 | 0.185165 | 0.108932   | -1.22385    | BGIOSGA031841 | XP_004983025.1 transcription factor-like protein DPB                                  |
| TCONS_00007136 | 0.185267 | 2.36607    | -1.85586    | BGIOSGA005904 | XP_015689555.1 aquaporin PIP 1-3                                                      |
| TCONS_00027226 | 0.185301 | -1.87148   | -0.815378   | BGIOSGA040494 | XP_004955700.1 probable nucleolar protein 5-1                                         |
| TCONS_00001007 | 0.185367 | -0.0887057 | -0.232254   | BGIOSGA003609 | XP_002460837.1 protein PGR                                                            |
| TCONS_00019388 | 0.185399 | 0.0301622  | 1.52521     | BGIOSGA031062 | XP_003568356.1 NAC domain-containing protein 90                                       |
| TCONS_00001198 | 0.185495 | -1.76863   | 1.50022     | BGIOSGA020255 | XP_006644309.1 calcineurin B-like protein 9                                           |
| TCONS_00002205 | 0.185558 | 1.55322    | #N/A        | BGIOSGA024463 | XP_003564666.1 acidic endochitinase                                                   |
| TCONS_00020569 | 0.1856   | 0.0936853  | 0.0223684   | BGIOSGA005712 | XP_006656024.1 enhancer of mRNA-decapping protein 4-like                              |
| TCONS_00002274 | 0.185649 | -1.54376   | -0.877129   | BGIOSGA004263 | XP_006645107.1 RNA-binding protein 24-B-like isoform X1                               |
| TCONS_00033899 | 0.185768 | #N/A       | 0.914582    | BGIOSGA015162 | XP_006663615.1 adenylyl-sulfate kinase 3-like                                         |
| TCONS_00005687 | 0.185768 | 1.78624    | 1.09658     | BGIOSGA021020 | XP_006647078.1 cysteine synthase-like                                                 |
| TCONS_00033281 | 0.185797 | -1.05852   | -0.00302794 | BGIOSGA001169 | XP_006662904.1 mitogen-activated protein kinase 15                                    |

transcriptome

| TCONS_ID       | Value 1  | Value 2    | Value 3     | Gene ID       | Description                                                                         |
|----------------|----------|------------|-------------|---------------|-------------------------------------------------------------------------------------|
| TCONS_00018946 | 0.185883 | -0.319085  | 0.903649    | #N/A          | #N/A                                                                                |
| TCONS_00032736 | 0.185911 | 0.194868   | 0.920068    | BGIOSGA031372 | XP_015697176.1 VAN3-binding protein-like                                            |
| TCONS_00022065 | 0.185939 | #N/A       | -3.00338    | BGIOSGA025003 | XP_006662662.1 peroxidase 4-like                                                    |
| TCONS_00008532 | 0.185939 | -3.40662   | -0.418418   | BGIOSGA025707 | XP_006647637.1 probable trehalose-phosphate phosphatase 1                           |
| TCONS_00009620 | 0.185994 | 0.474668   | -1.08152    | BGIOSGA029831 | XP_002436775.2U-box domain-containing protein 39                                    |
| TCONS_00011284 | 0.18604  | -0.12516   | -0.734001   | BGIOSGA037130 | XP_015690143.1 translocase of chloroplast 159, chloroplastic-like                   |
| TCONS_00009734 | 0.186048 | 0.953032   | 0.778466    | BGIOSGA012283 | XP_006649801.1 50S ribosomal protein L4, chloroplastic                              |
| TCONS_00016529 | 0.186048 | 0.153959   | -0.62514    | BGIOSGA022173 | XP_006652732.1 binding partner of ACD11 1-like isoform X1                           |
| TCONS_00004368 | 0.186101 | 0.818597   | 0.175539    | BGIOSGA021382 | XP_003569774.1probable 3-hydroxyisobutyrate dehydrogenase-like 1, mitochondrial     |
| TCONS_00017446 | 0.186128 | 0.459877   | 1.66357     | BGIOSGA022893 | XP_006654218.1 ribonuclease 3-like protein 2                                        |
| TCONS_00018044 | 0.186205 | 0.221077   | -0.556584   | BGIOSGA020092 | XP_010231224.1putative disease resistance protein RGA3                              |
| TCONS_00011420 | 0.186221 | -0.273264  | -0.117989   | BGIOSGA011604 | XP_006649241.2 phosphoglucan phosphatase DSP4, amyloplastic isoform X1              |
| TCONS_00024120 | 0.186231 | 1.26544    | 0.388211    | BGIOSGA026155 | NP_001151935.2calmodulin binding protein                                            |
| TCONS_00008974 | 0.186281 | 1.38436    | 0.617257    | BGIOSGA019802 | XP_022679429.1uncharacterized protein LOC101771126                                  |
| TCONS_00028128 | 0.186281 | 2.17791    | 1.4697      | BGIOSGA039076 | XP_006659478.2 putative F-box/LRR-repeat protein At3g18150                          |
| TCONS_00006090 | 0.186306 | 0.962152   | 0.658671    | BGIOSGA015087 | XP_002447851.1golgin subfamily A member 6-like protein 1                            |
| TCONS_00000098 | 0.186498 | -0.813316  | -0.117982   | BGIOSGA019197 | XP_022682352.1E3 ubiquitin-protein ligase SINA-like 10                              |
| TCONS_00013359 | 0.18659  | 1.93651    | 1.72083     | BGIOSGA009625 | XP_006650744.2 defective chorion-1 protein, FC106 isoform                           |
| TCONS_00032899 | 0.186657 | -0.112068  | -0.0722807  | BGIOSGA007026 | XP_014757318.1uncharacterized protein LOC100826700 isoform X3                       |
| TCONS_00016629 | 0.186679 | -1.14452   | -1.32715    | BGIOSGA000636 | NP_001170586.1uncharacterized LOC100384618                                          |
| TCONS_00014632 | 0.186723 | 0.806518   | 0.480097    | BGIOSGA040035 | XP_020400622.1ATP-dependent Clp protease proteolytic subunit isoform X1             |
| TCONS_00006267 | 0.186766 | 0.699254   | -0.120913   | BGIOSGA010979 | XP_003572617.1tubulin-folding cofactor C                                            |
| TCONS_00015008 | 0.186766 | 0.213827   | 1.10148     | BGIOSGA032389 | XP_015692241.1 anthocyanidin reductase-like                                         |
| TCONS_00026521 | 0.186829 | 0.514257   | 0.916404    | BGIOSGA028588 | XP_024314338.1putative F-box protein At5g15660                                      |
| TCONS_00000206 | 0.186891 | 1.46665    | 0.994253    | BGIOSGA002779 | XP_006451924.1ribosome biogenesis protein BRX1 homolog 1                            |
| TCONS_00017831 | 0.186932 | 0.411992   | 0.127802    | BGIOSGA024039 | XP_006654417.2 UPF0301 protein CT0663-like                                          |
| TCONS_00012879 | 0.186952 | 1.68325    | 0.828092    | BGIOSGA010101 | XP_006650384.1 protein CDC73 homolog                                                |
| TCONS_00017983 | 0.186952 | -2.63029   | -0.813252   | BGIOSGA019328 | XP_006654534.1 zinc transporter 5                                                   |
| TCONS_00032691 | 0.186972 | 0.53637    | 0.139483    | BGIOSGA012950 | XP_006662053.1 S-norcochlorine synthase 1-like                                      |
| TCONS_00004152 | 0.1872   | 0.591791   | -0.328443   | BGIOSGA022664 | XP_015688316.1 NAC domain-containing protein 73-like                                |
| TCONS_00019646 | 0.187218 | -1.99319   | -1.36913    | BGIOSGA019089 | XP_022680618.1uncharacterized protein LOC101766057                                  |
| TCONS_00018276 | 0.187221 | -0.771345  | 2.50509     | BGIOSGA001013 | XP_015693010.1 glutamate synthase 2 [NADH], chloroplastic-like                      |
| TCONS_00004181 | 0.187237 | 0.729249   | 0.426355    | BGIOSGA012257 | XP_006644527.1 beclin-1-like protein                                                |
| TCONS_00016838 | 0.187308 | -0.0193017 | 0.666991    | BGIOSGA014127 | XP_006653000.2 OTU domain-containing protein 3 isoform X1                           |
| TCONS_00013744 | 0.18736  | 0.147984   | -0.00691072 | BGIOSGA027032 | XP_004975140.21-aminocyclopropane-1-carboxylate oxidase homolog 1                   |
| TCONS_00012254 | 0.187511 | 0.591401   | 1.02834     | BGIOSGA017653 | XP_015690355.1 cell cycle checkpoint control protein RAD9A                          |
| TCONS_00015415 | 0.187559 | 0.969851   | 1.37111     | BGIOSGA015958 | XP_015691872.1 F-box protein At3g57580-like                                         |
| TCONS_00031830 | 0.187575 | 0.828359   | 0.0920922   | BGIOSGA018303 | XP_006662178.1PREDICTED: uncharacterized protein LOC102703339, partial              |
| TCONS_00022415 | 0.187591 | -1.63109   | -0.229875   | BGIOSGA021048 | XP_006656156.1 acidic repeat-containing protein-like                                |
| TCONS_00001553 | 0.187622 | 1.70277    | 1.25117     | BGIOSGA003649 | XP_006646168.1PREDICTED: uncharacterized protein LOC102709049                       |
| TCONS_00003703 | 0.187622 | 0.51726    | -0.329488   | BGIOSGA007575 | XP_003565911.2F-box protein SKIP23                                                  |
| TCONS_00030234 | 0.187699 | 0.864182   | 0.69269     | BGIOSGA020218 | XP_006661362.1 plant UBX domain-containing protein 10-like                          |
| TCONS_00010286 | 0.187714 | 0.939068   | 0.117743    | BGIOSGA001682 | XP_024312641.1putative ubiquitin-like-specific protease 1B isoform X2               |
| TCONS_00025008 | 0.187729 | -1.40887   | 0.272283    | BGIOSGA004101 | XP_004956076.1probable indole-3-pyruvate monooxygenase YUCCA5 isoform X1            |
| TCONS_00000658 | 0.187729 | -2.5788    | -0.370395   | BGIOSGA035136 | NP_001152938.2disulfide oxidoreductase/ monooxygenase/ oxidoreductase               |
| TCONS_00020309 | 0.187802 | -2.07193   | -1.08601    | BGIOSGA037023 | XP_021310100.1F-box/FBD/LRR-repeat protein At1g13570-like                           |
| TCONS_00018258 | 0.187901 | 1.45646    | 1.1535      | BGIOSGA008673 | XP_015692686.1 threonine synthase, chloroplastic-like                               |
| TCONS_00029539 | 0.187911 | -0.527904  | -0.649554   | BGIOSGA006315 | XP_002458624.1uncharacterized protein At2g27730, mitochondrial                      |
| TCONS_00025641 | 0.187929 | 1.43415    | 0.991679    | BGIOSGA013616 | NP_001333427.330S ribosomal protein S9, chloroplastic                               |
| TCONS_00030158 | 0.187943 | 0.80031    | 0.799       | BGIOSGA022020 | XP_006660687.1 ESX-1 secretion-associated protein EspK-like                         |
| TCONS_00015154 | 0.187956 | 1.6052     | 0.633158    | BGIOSGA008665 | XP_006653011.1PREDICTED: uncharacterized protein At2g24330-like                     |
| TCONS_00022522 | 0.188023 | 0.949166   | 1.56759     | BGIOSGA007750 | XP_006656213.1 adenine nucleotide transporter BT1, chloroplastic/mitochondrial-like |
| TCONS_00033494 | 0.188126 | 0.0286176  | 0.258755    | BGIOSGA035290 | XP_015698124.1PREDICTED: uncharacterized protein LOC102716539                       |
| TCONS_00015316 | 0.188151 | -3.21676   | 0.82763     | BGIOSGA032416 | XP_003566804.1serine decarboxylase 1                                                |

transcriptome

|                |          |            |             |               |                                                                                    |
|----------------|----------|------------|-------------|---------------|------------------------------------------------------------------------------------|
| TCONS_00034645 | 0.188151 | 0.136029   | 0.103604    | BGIOSGA034180 | XP_010237773.1F-box protein SKIP16 isoform X1                                      |
| TCONS_00035019 | 0.1882   | 0.105106   | 0.312935    | BGIOSGA034120 | XP_021317481.1ultraviolet-B receptor UVR8 isoform X1                               |
| TCONS_00022667 | 0.188237 | 0.318408   | 0.200371    | BGIOSGA012704 | XP_002438762.1magnesium transporter MRS2-B                                         |
| TCONS_00000179 | 0.188249 | -0.0375592 | 0.943839    | BGIOSGA002752 | XP_015688126.1 protein root UVB sensitive 5                                        |
| TCONS_00001426 | 0.188249 | 0.569713   | 0.183533    | BGIOSGA004055 | XP_006644408.1 SNF1-related protein kinase regulatory subunit gamma-1-like         |
| TCONS_00024310 | 0.188272 | -0.207924  | 0.916829    | BGIOSGA020890 | XP_006658947.1 BTB/POZ domain-containing protein At3g05675                         |
| TCONS_00023932 | 0.188296 | -1.28406   | -0.339377   | BGIOSGA021712 | XP_004958062.1scarecrow-like protein 23                                            |
| TCONS_00018392 | 0.188308 | 0.144334   | -0.476384   | BGIOSGA023790 | XP_006654846.1 serine carboxypeptidase-like 50                                     |
| TCONS_00004383 | 0.188342 | -0.895072  | -1.49477    | BGIOSGA005549 | XP_006644697.1 mannan endo-1,4-beta-mannosidase 2                                  |
| TCONS_00016794 | 0.188342 | -0.327183  | 0.295511    | BGIOSGA014173 | XP_015691658.1 inositol-pentakisphosphate 2-kinase IPK1 isoform X2                 |
| TCONS_00018389 | 0.188353 | 1.95957    | -0.594334   | BGIOSGA023790 | XP_006654846.1 serine carboxypeptidase-like 50                                     |
| TCONS_00005531 | 0.188549 | -1.87557   | 0.435946    | BGIOSGA007642 | XP_006646948.2 ribosomal RNA large subunit methyltransferase I                     |
| TCONS_00009905 | 0.18859  | 0.0325616  | 0.319352    | BGIOSGA012460 | XP_006649959.1 peptide chain release factor PrfB2, chloroplastic                   |
| TCONS_00037425 | 0.18862  | 0.278061   | -0.0100302  | BGIOSGA003959 | XP_006664147.1PREDICTED: uncharacterized protein LOC102709514, partial             |
| TCONS_00036591 | 0.188659 | 1.11602    | 0.805447    | BGIOSGA006482 | XP_006664296.1 probable arabinosyltransferase ARAD1                                |
| TCONS_00000381 | 0.188659 | 1.19764    | -0.943014   | BGIOSGA028723 | XP_003565468.1beta-glucuronosyltransferase GlcAT14B                                |
| TCONS_00009067 | 0.188698 | -0.0222771 | 0.398056    | BGIOSGA005337 | XP_015689493.1 acyl-CoA-binding domain-containing protein 4 isoform X2             |
| TCONS_00025153 | 0.188727 | -0.0893069 | -1.19271    | BGIOSGA031408 | XP_006657734.2 protein DETOXIFICATION 19-like                                      |
| TCONS_00034881 | 0.188882 | -0.211015  | -2.76556    | BGIOSGA031129 | XP_004979279.1cytochrome P450 78A5                                                 |
| TCONS_00007043 | 0.188959 | 0.578664   | 0.229025    | BGIOSGA028416 | XP_006648066.2 probable monogalactosyldiacylglycerol synthase 3, chloroplastic     |
| TCONS_00001419 | 0.188967 | -1.1474    | -1.33282    | BGIOSGA032260 | XP_006644403.1 probable receptor-like protein kinase At2g42960                     |
| TCONS_00023274 | 0.189024 | 1.03069    | 0.000651917 | BGIOSGA026471 | XP_006657527.1 AAA-ATPase At3g28580-like isoform X1                                |
| TCONS_00000846 | 0.189032 | 0.330032   | 0.100977    | BGIOSGA040458 | XP_006644144.1 AMSH-like ubiquitin thioesterase 3 isoform X1                       |
| TCONS_00011221 | 0.189049 | 0.987059   | 0.731414    | BGIOSGA019715 | XP_015691306.1 multiple inositol polyphosphate phosphatase 1                       |
| TCONS_00036118 | 0.189149 | 0.737786   | -0.547391   | BGIOSGA005583 | XP_003575954.3dicarboxylate transporter 1, chloroplastic                           |
| TCONS_00026894 | 0.189149 | 0.744618   | 0.387211    | BGIOSGA030378 | XP_015696142.1 beta-(1,2)-xylosyltransferase                                       |
| TCONS_00006104 | 0.189187 | 1.24706    | -0.399833   | BGIOSGA035935 | XP_015689216.1 flavonoid 3'-monooxygenase-like                                     |
| TCONS_00001308 | 0.189194 | 0.344172   | 0.688991    | BGIOSGA014062 | XP_002455911.1uncharacterized protein LOC8082509                                   |
| TCONS_00032372 | 0.189246 | -0.527329  | 0.762759    | BGIOSGA027127 | XP_006650259.2 psbP-like protein 1, chloroplastic isoform X2                       |
| TCONS_00006660 | 0.189266 | 0.820519   | 0.661209    | BGIOSGA004740 | XP_006647698.1 calcium-dependent protein kinase 26-like                            |
| TCONS_00022149 | 0.189335 | -0.925466  | -2.33372    | BGIOSGA022821 | XP_022681827.1salicylate carboxymethyltransferase                                  |
| TCONS_00031350 | 0.189348 | 0.308982   | 0.222635    | BGIOSGA033164 | XP_006662461.1 njmegen breakage syndrome 1 protein                                 |
| TCONS_00006534 | 0.189446 | -0.388312  | 0.0981123   | BGIOSGA021893 | XP_015689367.1 O-glucosyltransferase rumi homolog                                  |
| TCONS_00016495 | 0.189538 | 0.283044   | 0.824852    | BGIOSGA017726 | XP_006653709.2 glutamate receptor 3.1                                              |
| TCONS_00024679 | 0.189596 | 0.655893   | -0.275476   | BGIOSGA013092 | XP_015694852.1 probable serine/threonine-protein kinase WNK3 isoform X2            |
| TCONS_00036143 | 0.189596 | 0.942416   | 0.862027    | BGIOSGA037499 | XP_006664599.1 AP-5 complex subunit mu                                             |
| TCONS_00004026 | 0.189658 | -0.111253  | 1.08487     | BGIOSGA035109 | XP_006644399.1 mitogen-activated protein kinase 10 isoform X2                      |
| TCONS_00005540 | 0.189712 | -1.73329   | -1.74969    | BGIOSGA020744 | XP_006646955.1 V-type proton ATPase catalytic subunit A-like                       |
| TCONS_00007458 | 0.189754 | -1.53072   | -0.0359141  | BGIOSGA030792 | XP_015689648.1 protein ECERIFERUM 3-like                                           |
| TCONS_00013394 | 0.18982  | 0.645832   | 1.08134     | BGIOSGA017463 | XP_006650773.2 mitochondrial Rho GTPase 1                                          |
| TCONS_00006966 | 0.189882 | -0.317894  | 0.93524     | BGIOSGA003352 | XP_006649096.2PREDICTED: uncharacterized protein LOC102721055                      |
| TCONS_00022199 | 0.189915 | 0.753664   | 0.961536    | BGIOSGA021296 | XP_021305112.1RNA-binding KH domain-containing protein RCF3                        |
| TCONS_00002115 | 0.189928 | 0.467056   | 1.07694     | BGIOSGA004743 | XP_004970460.2pentatricopeptide repeat-containing protein At5g39980, chloroplastic |
| TCONS_00026897 | 0.190012 | 1.13258    | 0.747345    | BGIOSGA019961 | XP_002445914.1nucleolin 1 isoform X1                                               |
| TCONS_00006432 | 0.190025 | -0.394411  | 0.336086    | BGIOSGA034193 | XP_006664907.1 acetolactate synthase small subunit 2, chloroplastic-like           |
| TCONS_00008524 | 0.190054 | 0.0926771  | -0.191908   | BGIOSGA005902 | XP_015688684.1PREDICTED: uncharacterized protein LOC102708416                      |
| TCONS_00004147 | 0.190135 | 0.425098   | 0.32532     | BGIOSGA000812 | XP_006644500.1 auxin response factor 2-like                                        |
| TCONS_00018988 | 0.190169 | 0.726207   | 0.649112    | BGIOSGA023019 | XP_006659268.1 crooked neck-like protein 1                                         |
| TCONS_00004528 | 0.190199 | -0.455046  | -1.55707    | BGIOSGA014006 | XP_015690164.1 receptor-like serine/threonine-protein kinase SD1-8                 |
| TCONS_00000924 | 0.190217 | -0.948053  | 0.128047    | BGIOSGA015816 | XP_021311050.1wall-associated receptor kinase 5                                    |
| TCONS_00035392 | 0.190305 | -1.69245   | 0.226257    | BGIOSGA035676 | XP_015698052.1 myb-related protein MYBAS1-like isoform X1                          |
| TCONS_00035047 | 0.190417 | -0.233913  | 0.229461    | BGIOSGA020165 | XP_006661557.2PREDICTED: uncharacterized protein LOC102715238                      |



transcriptome

|                |          |            |             |               |                                                                                                                              |
|----------------|----------|------------|-------------|---------------|------------------------------------------------------------------------------------------------------------------------------|
| TCONS_00035420 | 0.1905   | -0.348224  | 1.04946     | BGIOSGA018538 | XP_015698258.1.PREDICTED: uncharacterized protein LOC102701320, partial                                                      |
| TCONS_00022558 | 0.1905   | -0.720476  | -0.545183   | BGIOSGA019734 | XP_015693926.1 protein QUIRKY-like                                                                                           |
| TCONS_00031314 | 0.190665 | -0.125279  | 0.25203     | BGIOSGA033130 | XP_002467083.1.exportin-4 isoform X1                                                                                         |
| TCONS_00004193 | 0.190679 | -1.0458    | 0.022365    | BGIOSGA001008 | XP_006646213.1 DNA ligase 3 isoform X1<br>XP_006649632.1 nuclear receptor coactivator 6-like isoform X2                      |
| TCONS_00011789 | 0.190773 | 0.502607   | 0.270712    | BGIOSGA011215 | XP_002462259.1.uncharacterized protein LOC8055553                                                                            |
| TCONS_00029879 | 0.190877 | 0.768414   | 0.723641    | BGIOSGA017545 | XP_006647325.2 putative SWI/SNF-related matrix-associated actin-dependent regulator of chromatin subfamily A member 3-like 2 |
| TCONS_00006181 | 0.190961 | 0.825855   | 0.848136    | BGIOSGA027158 | XP_006659300.1 ribonuclease E/G-like protein, chloroplastic isoform X1                                                       |
| TCONS_00027808 | 0.191027 | 0.829262   | 0.747144    | BGIOSGA003349 | XP_015698043.1.PREDICTED: uncharacterized protein LOC102714235 isoform X1                                                    |
| TCONS_00034346 | 0.191038 | 0.656393   | 0.776776    | BGIOSGA034458 | XP_006657173.2 probable E3 ubiquitin ligase SUD1                                                                             |
| TCONS_00022629 | 0.191071 | 0.982452   | 1.5113      | BGIOSGA001690 | XP_006649938.1 U2 small nuclear ribonucleoprotein B' isoform X1                                                              |
| TCONS_00012097 | 0.191206 | 0.033522   | 0.589563    | BGIOSGA010914 | XP_006646125.1 cytochrome P450 72A14-like                                                                                    |
| TCONS_00004022 | 0.191257 | 0.31935    | -0.00969814 | BGIOSGA001269 | XP_015688562.1 probable pre-mRNA-splicing factor ATP-dependent RNA helicase DEAH5                                            |
| TCONS_00005892 | 0.191262 | 0.862005   | 0.777008    | BGIOSGA010512 |                                                                                                                              |
| TCONS_00007091 | 0.191306 | 0.0329928  | -0.411448   | BGIOSGA031926 | XP_021315271.1 glutathione reductase, cytosolic                                                                              |
| TCONS_00021373 | 0.19135  | -0.676936  | -0.293092   | BGIOSGA008711 | XP_003563566.1.uncharacterized protein LOC100837238<br>XP_004981897.1.prostamide/prostaglandin F synthase                    |
| TCONS_00013112 | 0.191601 | -0.256691  | -0.328331   | BGIOSGA009875 | XP_006645891.1 protein HASTY 1                                                                                               |
| TCONS_00000923 | 0.19161  | 1.36313    | 0.40641     | BGIOSGA016114 | XP_015695228.1 E3 ubiquitin-protein ligase SHPRH                                                                             |
| TCONS_00025714 | 0.191683 | 0.421438   | 0.640072    | BGIOSGA005100 | XP_015689236.1 vacuolar protein sorting-associated protein 8 homolog                                                         |
| TCONS_00005316 | 0.191694 | 0.980065   | 0.622222    | BGIOSGA007426 | XP_002452299.1.NADH dehydrogenase [ubiquinone] 1 beta subcomplex subunit 3-B                                                 |
| TCONS_00006285 | 0.192088 | -0.437978  | 0.357566    | BGIOSGA021586 | XP_006660157.2 myb family transcription factor APL-like                                                                      |
| TCONS_00028058 | 0.192222 | 0.316089   | -0.42421    | BGIOSGA013292 | XP_006663744.1 probable non-specific lipid-transfer protein 3                                                                |
| TCONS_00034169 | 0.192506 | -1.09656   | -0.523432   | BGIOSGA000316 | XP_006663904.1 glutathione S-transferase-like                                                                                |
| TCONS_00035740 | 0.192602 | 0.176193   | -0.638133   | BGIOSGA037151 | XP_006662471.1.PREDICTED: uncharacterized protein LOC102702787                                                               |
| TCONS_00032488 | 0.192756 | -1.02533   | 0.0288007   | BGIOSGA031630 | XP_006647011.1 cinnamyl alcohol dehydrogenase 2                                                                              |
| TCONS_00007489 | 0.192881 | -0.175111  | -1.33406    | BGIOSGA019309 | XP_002466094.1.basic transcription factor 3                                                                                  |
| TCONS_00011342 | 0.19317  | 0.772861   | 0.494186    | BGIOSGA031670 | XP_012699680.1.remorin 4.1                                                                                                   |
| TCONS_00025371 | 0.193391 | 0.933484   | 0.684692    | BGIOSGA025377 | XP_002463160.1.mitochondrial import inner membrane translocase subunit TIM17-2                                               |
| TCONS_00025502 | 0.193665 | 0.353463   | 0.69847     | BGIOSGA012869 | XP_006658114.1 60S ribosomal protein L22-2                                                                                   |
| TCONS_00024335 | 0.1937   | 0.172057   | 0.788805    | BGIOSGA010760 | XP_006661960.1 cytochrome b5                                                                                                 |
| TCONS_00032569 | 0.194557 | -0.308701  | 0.88525     | BGIOSGA005932 | XP_006645340.1.PREDICTED: uncharacterized protein LOC102711847 isoform X1                                                    |
| TCONS_00002609 | 0.194648 | -0.133283  | 0.474411    | BGIOSGA019021 | XP_010228769.1.uncharacterized protein LOC104581804                                                                          |
| TCONS_00020734 | 0.194743 | 0.0142388  | -0.377813   | BGIOSGA033878 | XP_004974050.1.E3 ubiquitin-protein ligase RFI2 isoform X1                                                                   |
| TCONS_00029328 | 0.196467 | -0.480225  | -0.154227   | BGIOSGA029079 | XP_006659016.1 vesicle-associated membrane protein 714                                                                       |
| TCONS_00031856 | 0.196525 | 0.49345    | 0.796815    | BGIOSGA019049 | XP_006650687.2 cell differentiation protein RCD1 homolog                                                                     |
| TCONS_00013282 | 0.196844 | 0.717861   | 0.279197    | BGIOSGA006650 | XP_002445975.1.NAD(P)H-quinone oxidoreductase subunit S, chloroplastic                                                       |
| TCONS_00024715 | 0.19705  | 0.177518   | -0.57507    | BGIOSGA024662 | XP_006644002.2 receptor-like protein kinase ANXUR1                                                                           |
| TCONS_00003231 | 0.197133 | -0.0636463 | 0.24122     | BGIOSGA021952 | XP_002464362.1.AAA-ATPase At2g46620                                                                                          |
| TCONS_00032572 | 0.1973   | 0.276525   | -0.987146   | BGIOSGA030859 | XP_006659132.1 60S ribosomal protein L34-like                                                                                |
| TCONS_00025941 | 0.197425 | -0.153605  | 0.328384    | BGIOSGA029768 | XP_006662084.1 eukaryotic translation initiation factor 3 subunit B-like                                                     |
| TCONS_00032739 | 0.197426 | 1.51905    | 0.239461    | BGIOSGA031366 | NP_001132515.1.CemA-like proton extrusion protein-related                                                                    |
| TCONS_00011428 | 0.197601 | -1.65458   | -0.568112   | BGIOSGA011596 | XP_015692736.1 E3 ubiquitin-protein ligase At1g63170-like isoform X1                                                         |
| TCONS_00017232 | 0.198142 | 0.0224002  | -0.153322   | BGIOSGA029989 | XP_015692871.1.PREDICTED: uncharacterized protein LOC102723056                                                               |
| TCONS_00018201 | 0.198679 | -0.291715  | 0.308828    | BGIOSGA001313 | XP_002437607.2.protein FREE1 isoform X1                                                                                      |
| TCONS_00021396 | 0.19868  | 0.783589   | 0.711322    | BGIOSGA029032 | XP_006646523.1.PREDICTED: uncharacterized protein LOC102705217                                                               |
| TCONS_00004808 | 0.198807 | -0.663294  | 0.375721    | BGIOSGA000407 | XP_006643951.2 activating signal cointegrator 1 complex subunit 1 isoform X1                                                 |
| TCONS_00000498 | 0.199085 | 0.321231   | 0.26154     | BGIOSGA013743 | XP_006660440.1 trafficking protein particle complex subunit 6B                                                               |
| TCONS_00024928 | 0.199115 | 0.0994041  | 0.31794     | BGIOSGA003690 | XP_004961164.1.uncharacterized protein LOC101785881 isoform X2                                                               |
| TCONS_00019827 | 0.199126 | -0.059022  | -0.0839689  | BGIOSGA014210 | XP_006653926.1 histone-lysine N-methyltransferase SUVR4-like isoform X1                                                      |
| TCONS_00037775 | 0.199262 | 0.188007   | 0.0825359   | BGIOSGA008642 | XP_006654230.2 lactoylglutathione lyase isoform X1                                                                           |
| TCONS_00019001 | 0.19931  | 0.293787   | 0.247399    | BGIOSGA018364 | XP_006654635.1 transcription elongation factor SPT5-like                                                                     |
| TCONS_00018109 | 0.199467 | 0.109705   | -0.216196   | BGIOSGA033806 | XP_006656337.1 serine/threonine-protein kinase At5g01020                                                                     |
| TCONS_00022717 | 0.199827 | 0.893811   | 0.559875    | BGIOSGA036687 | XP_015693242.1 probable ATP-dependent DNA helicase CHR12                                                                     |
| TCONS_00018612 | 0.19983  | 0.465052   | 0.653241    | BGIOSGA021779 | XP_004951449.1.CASP-like protein 2D1                                                                                         |
| TCONS_00007617 | 0.199848 | -0.204261  | -0.127116   | BGIOSGA025496 |                                                                                                                              |

## transcriptome

|                |          |             |             |               |                                                                                                                         |
|----------------|----------|-------------|-------------|---------------|-------------------------------------------------------------------------------------------------------------------------|
| TCONS_00032721 | 0.199906 | -1.6099     | 0.403826    | BGIOSGA012138 | XP_006662074.1 serine/threonine-protein kinase SAPK3<br>NP_001130618.1 uncharacterized protein                          |
| TCONS_00000578 | 0.199954 | -0.0963226  | -1.33379    | BGIOSGA002775 | LOC100191717                                                                                                            |
| TCONS_00028048 | 0.200096 | 0.369308    | 1.16895     | BGIOSGA026942 | XP_006659424.1 ultraviolet-B receptor UVR8-like                                                                         |
| TCONS_00019781 | 0.200182 | 0.710073    | 0.0743232   | BGIOSGA001453 | XP_004961249.1 auxin-responsive protein IAA19<br>XP_014751919.1 BTB/POZ and MATH domain-containing protein 4 isoform X1 |
| TCONS_00011112 | 0.200183 | 0.357038    | 0.333454    | BGIOSGA028229 | XP_006646429.1 protein MOR1                                                                                             |
| TCONS_00004620 | 0.20022  | 0.547451    | 0.375906    | BGIOSGA000596 | XP_006650086.1 acyl carrier protein 2, mitochondrial-like                                                               |
| TCONS_00012278 | 0.200279 | 0.935096    | 0.623707    | BGIOSGA018160 | XP_006654106.1 nucleolin-like                                                                                           |
| TCONS_00017234 | 0.200386 | -0.0975624  | 0.0872699   | BGIOSGA002889 | XP_006643904.1 PREDICTED: uncharacterized protein LOC102713673                                                          |
| TCONS_00000418 | 0.200727 | -1.25933    | -1.51952    | BGIOSGA019359 | XP_006656088.1 U-box domain-containing protein 6-like                                                                   |
| TCONS_00022257 | 0.201113 | 0.459476    | 0.0708989   | BGIOSGA005770 | XP_015692587.1 decapping nuclease DXO homolog, chloroplastic                                                            |
| TCONS_00017745 | 0.201215 | 1.09541     | 0.794302    | BGIOSGA008534 | XP_015698067.1 signal recognition particle 54 kDa protein, chloroplastic-like                                           |
| TCONS_00032983 | 0.201235 | 0.886931    | 0.0506167   | BGIOSGA034818 | XP_004971382.1 protein COFACTOR ASSEMBLY OF COMPLEX C SUBUNIT B CCB3, chloroplastic                                     |
| TCONS_00005158 | 0.201443 | 0.018497    | 0.285094    | BGIOSGA024865 | XP_006644367.1 PREDICTED: uncharacterized protein At1g03900                                                             |
| TCONS_00001357 | 0.201718 | -0.467732   | 0.364084    | BGIOSGA003989 | XP_006644601.1 WD-40 repeat-containing protein MS14 isoform X2                                                          |
| TCONS_00001673 | 0.201956 | 0.661617    | 0.698509    | BGIOSGA004308 | XP_006649392.1 PREDICTED: uncharacterized protein LOC102701985                                                          |
| TCONS_00011553 | 0.202015 | 1.01774     | 0.06144     | BGIOSGA011467 | XP_006647581.1 RNA polymerase II C-terminal domain phosphatase-like 1                                                   |
| TCONS_00006520 | 0.202094 | 0.97799     | 0.0939928   | BGIOSGA000463 | XP_006644511.1 probable glucuronosyltransferase Os01g0675500                                                            |
| TCONS_00004168 | 0.202245 | -0.659521   | -0.363039   | BGIOSGA020345 |                                                                                                                         |
| TCONS_00013428 | 0.20227  | -3.28266    | -1.45084    | BGIOSGA020192 | XP_006650802.1 chalcone-flavonone isomerase<br>XP_006663938.1 vacuolar protein sorting-associated protein 41 homolog    |
| TCONS_00013768 | 0.202279 | 0.457799    | 0.00459564  | BGIOSGA015532 | XP_006648869.1 PREDICTED: uncharacterized protein LOC102720212                                                          |
| TCONS_00008456 | 0.202329 | 0.287701    | 0.344894    | BGIOSGA025480 | XP_004963215.1 putative hydrolase C777.06c                                                                              |
| TCONS_00037532 | 0.202509 | -0.00417534 | 0.197328    | BGIOSGA026102 | XP_014755503.1 DDB1- and CUL4-associated factor 8                                                                       |
| TCONS_00031576 | 0.202745 | -0.238228   | -0.0214047  | BGIOSGA033391 | XP_006654585.1 cytochrome P450 98A1                                                                                     |
| TCONS_00018050 | 0.202798 | 0.8462      | 0.693752    | BGIOSGA010140 | XP_006654144.1 serine/threonine-protein phosphatase 5                                                                   |
| TCONS_00017312 | 0.202812 | 0.0363748   | 0.487182    | BGIOSGA019343 | XP_006653052.1 pentatricopeptide repeat-containing protein At5g04810, chloroplastic                                     |
| TCONS_00015202 | 0.202871 | 0.352216    | 0.602052    | BGIOSGA025968 | XP_004956162.1 uncharacterized protein LOC101776137                                                                     |
| TCONS_00030862 | 0.202983 | -0.0195729  | -0.645277   | BGIOSGA032169 | XP_006659495.1 protein transport protein SEC23                                                                          |
| TCONS_00026779 | 0.203427 | 0.48198     | 0.6498      | BGIOSGA035204 | XP_015691036.1 PREDICTED: uncharacterized protein LOC102707476 isoform X1                                               |
| TCONS_00013032 | 0.203679 | -0.242052   | 0.17077     | BGIOSGA025111 | XP_015690016.1 serine/threonine protein phosphatase 2A 57 kDa regulatory subunit B' beta isoform-like                   |
| TCONS_00012940 | 0.203853 | 0.284165    | 0.319715    | BGIOSGA025510 | XP_015695502.1 stomatin-like protein 2, mitochondrial                                                                   |
| TCONS_00025946 | 0.204468 | 1.33366     | 1.11639     | BGIOSGA027611 | XP_022685122.1 receptor kinase-like protein Xa21                                                                        |
| TCONS_00006514 | 0.204647 | -0.700926   | -0.501255   | BGIOSGA033672 | XP_006659310.1 protein EMSY-LIKE 3 isoform X2                                                                           |
| TCONS_00026398 | 0.204927 | 0.233203    | 1.09781     | BGIOSGA030091 | XP_006659240.1 (DL)-glycerol-3-phosphatase 2 isoform X2                                                                 |
| TCONS_00027631 | 0.205016 | -0.0876363  | -0.00187262 | BGIOSGA027387 | XP_006652892.1 uncharacterized aarF domain-containing protein kinase At1g71810, chloroplastic                           |
| TCONS_00015035 | 0.205079 | -0.564511   | -0.541348   | BGIOSGA014249 | XP_006660886.1 protein ODORANT1-like                                                                                    |
| TCONS_00030422 | 0.205203 | -1.92166    | -0.4889     | BGIOSGA016820 | XP_006657560.2 eukaryotic translation initiation factor 3 subunit E                                                     |
| TCONS_00024779 | 0.205448 | 0.984815    | 1.65697     | BGIOSGA025767 | XP_006651496.2 ATP-dependent Clp protease proteolytic subunit 6, chloroplastic isoform X2                               |
| TCONS_00010290 | 0.205671 | -0.0166676  | 0.653938    | BGIOSGA012854 | XP_015689957.1 probable membrane metalloprotease ARASP2, chloroplastic                                                  |
| TCONS_00012601 | 0.205685 | 1.9652      | 0.295551    | BGIOSGA015033 | XP_006657615.1 PREDICTED: uncharacterized protein LOC102708261 isoform X1                                               |
| TCONS_00023492 | 0.206001 | -0.276289   | -0.163679   | BGIOSGA025530 | XP_006649483.1 polyadenylate-binding protein RBP47B'                                                                    |
| TCONS_00009407 | 0.206157 | 0.456917    | 0.710066    | BGIOSGA010409 | XP_006659419.1 PREDICTED: uncharacterized protein LOC102711722 isoform X1                                               |
| TCONS_00028044 | 0.206158 | 0.308563    | 0.222181    | BGIOSGA026946 | XP_015688859.1 glutathionyl-hydroquinone reductase YqjG-like isoform X1                                                 |
| TCONS_00007891 | 0.206188 | 0.0890715   | -0.417211   | BGIOSGA006585 | XP_006655740.1 BTB/POZ domain-containing protein At3g05675-like                                                         |
| TCONS_00021534 | 0.206348 | -0.474843   | 0.00010942  | BGIOSGA022016 | XP_015695344.1 PREDICTED: uncharacterized protein At4g14100-like                                                        |
| TCONS_00024695 | 0.206414 | 0.939094    | 1.07362     | BGIOSGA025679 | XP_006660669.1 phospholipid:diacylglycerol acyltransferase 1-like                                                       |
| TCONS_00030132 | 0.206492 | -0.486477   | -0.174394   | BGIOSGA029674 | XP_015695278.1 cysteine-rich receptor-like protein kinase 10                                                            |
| TCONS_00025264 | 0.206551 | 1.24101     | 0.224891    | BGIOSGA024030 | XP_006648166.1 PREDICTED: uncharacterized protein LOC102709903                                                          |
| TCONS_00000042 | 0.206604 | -0.261783   | -0.0146478  | BGIOSGA002610 | XP_015689850.1 thioredoxin-like protein AAED1, chloroplastic                                                            |
| TCONS_00009813 | 0.206755 | -0.840761   | -1.1332     | BGIOSGA027395 |                                                                                                                         |

## transcriptome

|                |          |            |            |              |                                                                                                                  |
|----------------|----------|------------|------------|--------------|------------------------------------------------------------------------------------------------------------------|
| TCONS_00002305 | 0.206955 | -0.121462  | -0.311821  | BGOSGA002195 | XP_021312164.1protein root UVB sensitive 6-like<br>XP_006644494.2PREDICTED: uncharacterized protein LOC102699448 |
| TCONS_00001543 | 0.207024 | 0.353411   | 0.310295   | BGOSGA004652 | XP_015695734.1PREDICTED: uncharacterized protein LOC102699330 isoform X2                                         |
| TCONS_00025961 | 0.207332 | 0.312279   | -1.71365   | BGOSGA028037 | XP_006656315.1 probable GDP-L-fucose synthase 1                                                                  |
| TCONS_00021161 | 0.207465 | 1.52214    | 0.13682    | BGOSGA020765 | NP_001136758.150S ribosomal protein L31                                                                          |
| TCONS_00004032 | 0.207471 | 1.26282    | 0.0241468  | BGOSGA001162 | XP_006644013.1 serine/threonine-protein kinase CDL1-like isoform X2                                              |
| TCONS_00000600 | 0.207626 | 0.503204   | 0.074719   | BGOSGA031081 | XP_021312878.1respiratory burst oxidase homolog protein A                                                        |
| TCONS_00001770 | 0.207666 | -0.756021  | -1.13937   | BGOSGA020004 | XP_015693185.1 pentatricopeptide repeat-containing protein At5g67570, chloroplastic-like                         |
| TCONS_00019045 | 0.207911 | 0.877776   | 0.707997   | BGOSGA018316 | XP_006664220.1 5-methyltetrahydropteroyltriglutamate--homocysteine methyltransferase 1                           |
| TCONS_00036458 | 0.207972 | 0.518579   | -0.482674  | BGOSGA039527 | XP_006663687.2 glucan endo-1,3-beta-glucosidase-like                                                             |
| TCONS_00035405 | 0.207995 | 2.01353    | 0.638473   | BGOSGA010085 | XP_006652420.2 SWI/SNF complex subunit SWI3A-like                                                                |
| TCONS_00014452 | 0.208064 | 0.964708   | 0.382479   | BGOSGA016612 | XP_015690723.1 transcription initiation factor TFIIID subunit 4b-like isoform X3                                 |
| TCONS_00012522 | 0.208252 | -0.392655  | -0.787473  | BGOSGA010460 | XP_006657719.1 nucleoside diphosphate kinase 1                                                                   |
| TCONS_00025122 | 0.208333 | 0.42847    | -0.0722442 | BGOSGA031391 | XP_006663954.1 ribulose bisphosphate carboxylase small chain, chloroplastic-like                                 |
| TCONS_00038151 | 0.208473 | 0.193923   | -0.904611  | BGOSGA037260 | XP_006659714.1 zinc finger protein 593 homolog                                                                   |
| TCONS_00028486 | 0.208483 | 0.792049   | -0.214601  | BGOSGA026470 | XP_015698423.1 amino acid permease 3                                                                             |
| TCONS_00035683 | 0.208535 | -0.416793  | 0.029054   | BGOSGA014304 | XP_015698744.1 UDP-glucose 6-dehydrogenase 5                                                                     |
| TCONS_00035969 | 0.208886 | -0.472389  | -1.2058    | BGOSGA010277 | XP_006651352.1PREDICTED: uncharacterized protein LOC102715929                                                    |
| TCONS_00010027 | 0.209053 | 0.0162704  | 0.67678    | BGOSGA036365 | XP_006655521.2 CLP protease regulatory subunit CLPX3, mitochondrial-like                                         |
| TCONS_00018192 | 0.209095 | -0.355265  | 1.05907    | BGOSGA039709 | XP_006649735.1 ATP-dependent Clp protease ATP-binding subunit CLPT1, chloroplastic-like                          |
| TCONS_00011898 | 0.209115 | 1.5674     | 0.434793   | BGOSGA011117 | XP_021307931.1uncharacterized protein LOC8079378                                                                 |
| TCONS_00025579 | 0.209314 | 0.662751   | -0.179021  | BGOSGA036000 | XP_006650760.1PREDICTED: uncharacterized protein LOC102720690                                                    |
| TCONS_00011174 | 0.209336 | -1.07015   | 0.20361    | BGOSGA025979 | XP_003557221.1coiled-coil domain-containing protein 97                                                           |
| TCONS_00020089 | 0.209425 | 0.146425   | 1.04309    | BGOSGA022265 | XP_003559518.1zinc finger protein VAR3, chloroplastic                                                            |
| TCONS_00010800 | 0.209621 | -0.1936    | 0.131476   | BGOSGA024442 | XP_015693859.1 formamidopyrimidine-DNA glycosylase-like                                                          |
| TCONS_00022643 | 0.209659 | 0.0431384  | 0.403514   | BGOSGA015054 | XP_006662827.1 uncharacterized aarF domain-containing protein kinase At4g31390, chloroplastic isoform X1         |
| TCONS_00034535 | 0.20967  | -0.422944  | -1.06777   | BGOSGA018344 | XP_006650817.1 nucleobase-ascorbate transporter 6-like                                                           |
| TCONS_00013444 | 0.20972  | 0.218513   | 0.288367   | BGOSGA037684 | XP_006656270.1 papilin                                                                                           |
| TCONS_00021080 | 0.210188 | 0.00440633 | 0.0778437  | BGOSGA023307 | XP_006654551.1 B3 domain-containing protein Os05g0481400-like                                                    |
| TCONS_00019505 | 0.210487 | 0.230216   | 1.06209    | BGOSGA017853 | XP_006654207.2 peptide chain release factor 1 isoform X1                                                         |
| TCONS_00018976 | 0.210618 | 1.03714    | 0.591021   | BGOSGA018388 | XP_003557242.13-phosphoshikimate 1-carboxyvinyltransferase 2                                                     |
| TCONS_00020065 | 0.210646 | 0.807535   | 0.557882   | BGOSGA022246 | XP_015689789.1 protein TIFY 11b-like                                                                             |
| TCONS_00009434 | 0.210685 | -1.11488   | -1.03992   | BGOSGA032002 | XP_003573697.1zinc finger CCCH domain-containing protein 13                                                      |
| TCONS_00007189 | 0.210925 | 1.302      | 1.16658    | BGOSGA007309 | XP_006644045.1PREDICTED: uncharacterized protein LOC102707253                                                    |
| TCONS_00003300 | 0.210983 | 0.513327   | 0.828522   | BGOSGA001913 | XP_006656298.1 isoleucine--tRNA ligase, cytoplasmic-like                                                         |
| TCONS_00021140 | 0.211056 | 1.05352    | 0.852712   | BGOSGA007008 | XP_006647129.1 bifunctional riboflavin kinase/FMN phosphatase-like                                               |
| TCONS_00032383 | 0.211179 | -0.172811  | 0.360737   | BGOSGA032168 | XP_006653524.1PREDICTED: uncharacterized protein LOC102708054                                                    |
| TCONS_00016106 | 0.211199 | 1.74692    | 1.17549    | BGOSGA031359 | XP_006652367.1 cyclic pyranopterin monophosphate synthase accessory protein, mitochondrial                       |
| TCONS_00014390 | 0.211308 | -0.684128  | 0.717584   | BGOSGA016545 | XP_006662016.2 probable serine/threonine-protein kinase At4g35230                                                |
| TCONS_00031571 | 0.21132  | 0.532575   | 0.223325   | BGOSGA035864 | XP_006651169.1 cysteine synthase 2                                                                               |
| TCONS_00009570 | 0.211493 | 0.785821   | 0.528147   | BGOSGA012201 | XP_015690116.1 protein YLS3                                                                                      |
| TCONS_00011156 | 0.211582 | -0.398987  | -1.02059   | BGOSGA011934 | XP_006647647.1 tripeptidyl-peptidase 2                                                                           |
| TCONS_00006600 | 0.211623 | -0.577118  | 0.209865   | BGOSGA008767 | XP_006649065.1 MADS-box transcription factor 22                                                                  |
| TCONS_00006914 | 0.211706 | 0.016369   | 0.104599   | BGOSGA008494 | XP_004958286.1stress-response A/B barrel domain-containing protein UP3                                           |
| TCONS_00024077 | 0.211715 | 0.365417   | 0.380805   | BGOSGA028956 | XP_003563624.1TBCC domain-containing protein 1                                                                   |
| TCONS_00021036 | 0.211743 | 0.589057   | 0.117388   | BGOSGA032254 | XP_006650476.2 DEAD-box ATP-dependent RNA helicase 21                                                            |
| TCONS_00013036 | 0.211912 | 1.12857    | 0.217758   | BGOSGA027614 | XP_006647426.2 protein PHYLL0, chloroplastic                                                                     |
| TCONS_00006341 | 0.212002 | -0.434444  | 1.00778    | BGOSGA008503 | XP_004975144.1electron transfer flavoprotein subunit beta, mitochondrial                                         |
| TCONS_00015400 | 0.212067 | -0.0896874 | 0.353767   | BGOSGA015973 | XP_006650446.1 importin-5-like                                                                                   |
| TCONS_00010771 | 0.212158 | 0.949069   | 0.940853   | BGOSGA024034 | XP_006644788.1 photosystem II reaction center W protein, chloroplastic                                           |
| TCONS_00018102 | 0.212259 | -1.54661   | -0.755075  | BGOSGA020157 | XP_006645043.2 nuclear pore complex protein NUP62                                                                |
| TCONS_00004751 | 0.212369 | -0.18003   | 0.959103   | BGOSGA000465 |                                                                                                                  |

transcriptome

|                |          |             |            |               |                                                                                          |
|----------------|----------|-------------|------------|---------------|------------------------------------------------------------------------------------------|
| TCONS_00009880 | 0.212395 | 0.0512742   | 0.808451   | BGIOSGA012434 | XP_006649940.2 probable LL-diaminopimelate aminotransferase, chloroplastic               |
| TCONS_00008882 | 0.212457 | -0.117989   | -1.13566   | BGIOSGA005530 | XP_006647974.1 E3 ubiquitin-protein ligase COP1                                          |
| TCONS_00006747 | 0.212803 | 1.18673     | 1.86281    | BGIOSGA026594 | XP_006647790.1 ribose-phosphate pyrophosphokinase 4                                      |
| TCONS_00018461 | 0.212967 | -0.377358   | -0.281031  | BGIOSGA027876 | XP_006654897.2 E3 ubiquitin-protein ligase CHIP-like                                     |
| TCONS_00025992 | 0.213121 | 0.222742    | 0.477618   | BGIOSGA028066 | XP_006659174.1 PREDICTED: uncharacterized protein LOC102704722                           |
| TCONS_00033131 | 0.213329 | 0.663884    | 0.538786   | BGIOSGA025493 | XP_006663270.2 protein translocase subunit SECA2, chloroplastic                          |
| TCONS_00008545 | 0.213402 | 0.371689    | 0.458816   | BGIOSGA015055 | XP_006647655.1 mitogen-activated protein kinase kinase kinase YODA-like                  |
| TCONS_00002841 | 0.213602 | 0.268481    | 0.259653   | BGIOSGA001568 | XP_010230326.1 histone H2B.3                                                             |
| TCONS_00006690 | 0.213658 | 0.275495    | -1.27914   | BGIOSGA033500 | XP_006647728.1 lysine-specific demethylase JM706-like                                    |
| TCONS_00030326 | 0.213727 | 1.13329     | 1.04023    | BGIOSGA026611 | XP_015696826.1 ubiquitin carboxyl-terminal hydrolase 2-like                              |
| TCONS_00018908 | 0.213989 | 0.0999324   | 0.618088   | BGIOSGA018990 | NP_001146919.1 OB-fold nucleic acid binding domain containing protein                    |
| TCONS_00024708 | 0.214212 | -0.716897   | -0.512288  | BGIOSGA022553 | XP_015694803.1 probable beta-1,3-galactosyltransferase 18                                |
| TCONS_00005085 | 0.214225 | -0.423978   | -0.296112  | BGIOSGA003961 | XP_004971226.1 amino-acid permease BAT1 homolog isoform X1                               |
| TCONS_00027447 | 0.21423  | 1.00098     | 0.988154   | BGIOSGA001004 | XP_015696125.1 IST1-like protein isoform X2                                              |
| TCONS_00021531 | 0.214286 | 0.658123    | 0.353788   | BGIOSGA022019 | XP_006655738.1 LIMR family protein Os06g0128200                                          |
| TCONS_00037427 | 0.214337 | -0.168637   | 0.513078   | BGIOSGA011239 | XP_003579243.1 metal transporter Nramp6                                                  |
| TCONS_00019879 | 0.214582 | 0.504702    | -0.648751  | BGIOSGA010862 | XP_006654844.1 protein REDUCED WALL ACETYLATION 3-like                                   |
| TCONS_00032719 | 0.214641 | 1.18246     | 0.511909   | BGIOSGA006688 | XP_002437450.160S ribosomal protein L27-3                                                |
| TCONS_00017625 | 0.215017 | 0.397053    | 1.27835    | BGIOSGA019687 | XP_006654294.1 developmentally-regulated G-protein 2                                     |
| TCONS_00015467 | 0.215507 | 0.707793    | 0.164935   | BGIOSGA015553 | XP_010239729.1 uncharacterized protein LOC100830596 isoform X1                           |
| TCONS_00024227 | 0.215565 | 0.893443    | 0.304536   | BGIOSGA026271 | XP_006658903.1 mediator of RNA polymerase II transcription subunit 12-like               |
| TCONS_00035086 | 0.215813 | 0.169036    | 0.81748    | BGIOSGA034024 | XP_021317268.1 formin-like protein 14                                                    |
| TCONS_00025912 | 0.215993 | 0.981711    | -0.913317  | BGIOSGA036682 | NP_001152070.1 phloem-specific lectin                                                    |
| TCONS_00016268 | 0.216257 | 0.324266    | 0.745951   | BGIOSGA022591 | XP_014751391.1 adenosine kinase 2                                                        |
| TCONS_00026876 | 0.216277 | 0.728448    | 0.498944   | BGIOSGA004288 | XP_002445942.1 chloride channel protein CLC-f                                            |
| TCONS_00002572 | 0.216292 | -0.00851847 | -0.0421986 | BGIOSGA024758 | XP_006645361.1 MACPF domain-containing protein At4g24290-like                            |
| TCONS_00022361 | 0.216379 | -3.91751    | -0.544107  | BGIOSGA003005 | XP_006656143.1 GDSL esterase/lipase At5g45910-like                                       |
| TCONS_00027795 | 0.216991 | 0.643475    | 0.213027   | BGIOSGA030237 | XP_006660038.1 kynurenine formamidase                                                    |
| TCONS_00023163 | 0.217013 | -0.0671857  | 0.0946324  | BGIOSGA025201 | XP_006650028.1 probable dolichyl pyrophosphate Man9GlcNAc2 alpha-1,3-glucosyltransferase |
| TCONS_00017206 | 0.21706  | 0.207524    | -0.535795  | BGIOSGA035020 | XP_006659182.1 60S ribosomal protein L10-2-like                                          |
| TCONS_00032639 | 0.217159 | 0.338505    | 0.789132   | BGIOSGA009838 | XP_015697472.1 putative magnesium transporter MRS2-G                                     |
| TCONS_00025168 | 0.217255 | -0.401662   | 0.428565   | BGIOSGA024246 | XP_006657741.1 serine/threonine-protein phosphatase 7 long form homolog                  |
| TCONS_00035964 | 0.217417 | -1.65046    | -1.188     | BGIOSGA037328 | XP_015698461.1 PREDICTED: uncharacterized protein LOC102714335                           |
| TCONS_00029096 | 0.217468 | 0.517056    | -0.0815874 | BGIOSGA022355 | XP_006660665.1 probable GTP diphosphokinase RSH3, chloroplastic                          |
| TCONS_00033856 | 0.217545 | 0.246319    | 0.152305   | BGIOSGA035631 | XP_006663052.1 monosaccharide-sensing protein 2-like                                     |
| TCONS_00019651 | 0.217695 | -0.223727   | 0.164013   | BGIOSGA022332 | XP_006654671.1 putative dual specificity protein phosphatase DSP8                        |
| TCONS_00010223 | 0.218079 | 0.156791    | -0.174684  | BGIOSGA012788 | XP_006650155.1 cytochrome c oxidase subunit 6b-1-like                                    |
| TCONS_00021924 | 0.218252 | -0.270406   | 1.19899    | BGIOSGA021599 | XP_006655948.1 DCN1-like protein 2                                                       |
| TCONS_00024157 | 0.218294 | 0.92962     | 1.34667    | BGIOSGA034875 | XP_006658862.2 29 kDa ribonucleoprotein A, chloroplastic-like                            |
| TCONS_00012127 | 0.218448 | -0.232497   | 0.218849   | BGIOSGA010881 | XP_006651312.1 histone-lysine N-methyltransferase EZ3 isoform X1                         |
| TCONS_00036231 | 0.218568 | 0.347238    | 0.351937   | BGIOSGA011654 | XP_006664099.1 DNA-directed RNA polymerases II, IV and V subunit 9B                      |
| TCONS_00023448 | 0.218661 | -0.77068    | -0.674207  | BGIOSGA025480 | XP_015694997.1 PREDICTED: uncharacterized protein LOC102722879                           |
| TCONS_00022647 | 0.218755 | -0.180364   | 0.746865   | BGIOSGA020795 | XP_006657185.1 protein OS-9 homolog                                                      |
| TCONS_00011973 | 0.219039 | 0.117285    | 0.660951   | BGIOSGA011037 | XP_015690712.1 rootletin                                                                 |
| TCONS_00024270 | 0.219086 | 0.3464      | -0.656457  | BGIOSGA028795 | XP_004958553.1 uncharacterized protein LOC101761302                                      |
| TCONS_00012560 | 0.2192   | 0.0468293   | -0.0556754 | BGIOSGA020564 | XP_006656081.1 PREDICTED: uncharacterized protein LOC102719021                           |
| TCONS_00000479 | 0.219281 | -1.79502    | -3.56533   | BGIOSGA003045 | XP_003565894.2 cytochrome P450 71A1-like                                                 |
| TCONS_00009165 | 0.219313 | -0.375397   | -0.335896  | BGIOSGA033155 | XP_006650965.1 PREDICTED: uncharacterized protein LOC102710288                           |
| TCONS_00032623 | 0.219408 | -0.0241226  | 0.427572   | BGIOSGA031487 | XP_015697335.1 PREDICTED: uncharacterized protein LOC102717830 isoform X2                |
| TCONS_00013114 | 0.21942  | -0.173115   | -2.84082   | BGIOSGA014953 | XP_008665348.1 lecithin-cholesterol acyltransferase-like 1                               |
| TCONS_00037217 | 0.219437 | 1.08776     | 1.43985    | BGIOSGA011496 | XP_003576164.1 GRF1-interacting factor 3                                                 |
| TCONS_00001520 | 0.219688 | -0.0151594  | 0.681638   | BGIOSGA004150 | XP_015691837.1 AMSH-like ubiquitin thioesterase 2                                        |
| TCONS_00035625 | 0.219694 | 1.38708     | 1.08823    | BGIOSGA037043 | XP_006664363.1 nucleolar complex protein 2 homolog                                       |
| TCONS_00033419 | 0.219999 | 0.218973    | -0.322572  | BGIOSGA028564 | XP_006661910.1 SKP1-like protein 1A                                                      |

## transcriptome

|                |          |            |              |               |                                                                                                                                                         |
|----------------|----------|------------|--------------|---------------|---------------------------------------------------------------------------------------------------------------------------------------------------------|
| TCONS_00025464 | 0.220205 | -0.724165  | -1.12007     | BGIOSGA025427 | XP_006657914.1 eukaryotic translation initiation factor 5A                                                                                              |
| TCONS_00018103 | 0.220243 | 0.687599   | 0.664083     | BGIOSGA020158 | XP_006655470.2 NADH dehydrogenase [ubiquinone] flavoprotein 2, mitochondrial<br>XP_006654773.1 probable glucuronosyltransferase Os05g0559600 isoform X1 |
| TCONS_00018292 | 0.220285 | 0.0241113  | 0.114392     | BGIOSGA001030 | XP_006644918.1 methionine--tRNA ligase, cytoplasmic                                                                                                     |
| TCONS_00004635 | 0.220309 | 0.245237   | 0.433217     | BGIOSGA000581 | XP_006659661.1 putative ER lumen protein-retaining receptor C28H8.4                                                                                     |
| TCONS_00027073 | 0.220312 | 0.643721   | 0.240051     | BGIOSGA031147 | XP_015695959.1 probable protein S-acyltransferase 7 isoform X1                                                                                          |
| TCONS_00028382 | 0.220441 | -0.232009  | 0.873064     | BGIOSGA003259 | XP_006657737.1 probable protein phosphatase 2C 62                                                                                                       |
| TCONS_00025164 | 0.220667 | -0.0910979 | 0.259172     | BGIOSGA014377 | XP_006644007.1 topless-related protein 2 isoform X1                                                                                                     |
| TCONS_00003236 | 0.220742 | 0.804068   | -0.0664927   | BGIOSGA011089 | XP_006660839.1 PT11-like tyrosine-protein kinase 3                                                                                                      |
| TCONS_00029333 | 0.221055 | 0.447519   | 0.264364     | BGIOSGA008872 | XP_015698002.1 serine/threonine-protein kinase At5g01020-like                                                                                           |
| TCONS_00034192 | 0.221202 | -2.10015   | -1.49208     | BGIOSGA006347 | XP_006658720.1 COMPASS-like H3K4 histone methylase component WDR5B                                                                                      |
| TCONS_00023945 | 0.2214   | 0.758514   | 1.23725      | BGIOSGA013491 | XP_015698357.1 protein tesmin/TSO1-like CXC 2                                                                                                           |
| TCONS_00037487 | 0.22149  | -0.0232165 | 0.723363     | BGIOSGA017747 | XP_004981498.1 fasciclin-like arabinogalactan protein 16                                                                                                |
| TCONS_00023154 | 0.221726 | -1.62673   | -1.85118     | BGIOSGA010955 | XP_015696222.1 structural maintenance of chromosomes protein 2-like                                                                                     |
| TCONS_00026801 | 0.221765 | -0.461322  | 0.0162144    | BGIOSGA028863 | XP_004978652.1R3H domain-containing protein 4                                                                                                           |
| TCONS_00032958 | 0.221776 | -1.01063   | -0.0416688   | BGIOSGA034789 | XP_003575004.1ferredoxin--NADP reductase, leaf isozyme 1, chloroplastic                                                                                 |
| TCONS_00007196 | 0.221867 | 0.628947   | -1.08013     | BGIOSGA022091 | XP_024318021.1probable serine/threonine protein phosphatase 2A regulatory subunit B''delta                                                              |
| TCONS_00007511 | 0.222239 | 0.777882   | 0.395477     | BGIOSGA033127 | XP_006654742.1 uncharacterized membrane protein YuiD-like                                                                                               |
| TCONS_00019734 | 0.222315 | -0.584632  | -0.507424    | BGIOSGA017626 | NP_001145047.1 uncharacterized protein LOC100278233                                                                                                     |
| TCONS_00007382 | 0.222325 | 1.06281    | 1.33866      | BGIOSGA007094 | XP_004963206.1protease Do-like 5, chloroplastic isoform X2                                                                                              |
| TCONS_00036432 | 0.222344 | -0.0866668 | 0.0680494    | BGIOSGA037801 | XP_006646993.2 SWI/SNF complex subunit SWI3B                                                                                                            |
| TCONS_00005609 | 0.222373 | 0.600818   | 0.919891     | BGIOSGA007722 | XP_012704257.1probable inactive receptor kinase At3g02880 isoform X2                                                                                    |
| TCONS_00031373 | 0.222399 | -2.70121   | -0.565923    | BGIOSGA007384 | XP_006647431.2 ras-related protein Rab-2-B-like                                                                                                         |
| TCONS_00006347 | 0.222437 | 0.657405   | -0.0556816   | BGIOSGA032170 | XP_006645301.1 photosystem II reaction center PSB28 protein, chloroplastic                                                                              |
| TCONS_00002487 | 0.222468 | -0.181518  | -1.98767     | BGIOSGA005132 | XP_006647534.1 casein kinase I-like                                                                                                                     |
| TCONS_00006473 | 0.223256 | -0.139206  | -0.138243    | BGIOSGA017448 | XP_015696700.1 formate--tetrahydrofolate ligase                                                                                                         |
| TCONS_00029112 | 0.223322 | 0.199952   | 0.63828      | BGIOSGA030864 | XP_006652567.1 DEAD-box ATP-dependent RNA helicase 6-like                                                                                               |
| TCONS_00014656 | 0.223361 | 0.480981   | 0.164431     | BGIOSGA008699 | XP_006663995.2PREDICTED: uncharacterized protein LOC102712128, partial                                                                                  |
| TCONS_00035950 | 0.223691 | -2.02808   | -0.073114    | BGIOSGA037318 | XP_006647948.1 putative 4-hydroxy-4-methyl-2-oxoglutarate aldolase 2                                                                                    |
| TCONS_00008847 | 0.223707 | -0.437128  | -0.103141    | BGIOSGA005569 | XP_015695413.1PREDICTED: uncharacterized protein LOC102718937                                                                                           |
| TCONS_00023373 | 0.22375  | 0.0173393  | -0.148082    | BGIOSGA008928 | XP_003573122.1disheveled-associated activator of morphogenesis 2                                                                                        |
| TCONS_00026939 | 0.224117 | -0.0647458 | 0.37954      | BGIOSGA028990 | XP_015689675.1 vacuolar protein sorting-associated protein 29                                                                                           |
| TCONS_00007744 | 0.224224 | 0.690725   | 0.134438     | BGIOSGA006737 | XP_006655638.1 probable protein ABIL4                                                                                                                   |
| TCONS_00018403 | 0.224242 | -4.61586   | -0.457521    | BGIOSGA001183 | XP_006660715.1 glucose-6-phosphate isomerase 1, chloroplastic-like                                                                                      |
| TCONS_00030183 | 0.224288 | 0.364515   | 0.127378     | BGIOSGA026799 | XP_006648833.1PREDICTED: uncharacterized protein LOC102707653                                                                                           |
| TCONS_00008372 | 0.224395 | 0.55271    | 0.124635     | BGIOSGA035892 | XP_006661829.1 splicing factor 3B subunit 4                                                                                                             |
| TCONS_00031256 | 0.224466 | 1.62953    | 1.33853      | BGIOSGA008935 | XP_015691194.1 mannose-1-phosphate guanylyltransferase alpha                                                                                            |
| TCONS_00011767 | 0.224481 | 1.21912    | -0.000922633 | BGIOSGA011238 | XP_006655901.1 transmembrane emp24 domain-containing protein p24delta3-like                                                                             |
| TCONS_00020335 | 0.224526 | 0.252526   | -0.0589866   | BGIOSGA030888 | XP_006664948.1PREDICTED: uncharacterized protein LOC102709138                                                                                           |
| TCONS_00013660 | 0.22453  | -0.72459   | -0.241125    | BGIOSGA011417 | XP_006650294.1 protein DEK-like                                                                                                                         |
| TCONS_00012658 | 0.224871 | 0.645761   | 0.220787     | BGIOSGA010307 | XP_006661529.1 cytochrome b561, DM13 and DOMON domain-containing protein At5g54830-like                                                                 |
| TCONS_00030524 | 0.225136 | 1.26368    | 0.460988     | BGIOSGA023376 | XP_006653412.1 protein disulfide isomerase-like 5-2                                                                                                     |
| TCONS_00015905 | 0.225215 | 0.705218   | 1.29052      | BGIOSGA003439 | XP_021303489.1aldose reductase                                                                                                                          |
| TCONS_00017991 | 0.225528 | 0.0572004  | 0.132033     | BGIOSGA020040 | XP_006650828.2 non-specific phospholipase C1                                                                                                            |
| TCONS_00011256 | 0.225608 | 1.12796    | 0.564698     | BGIOSGA029456 | XP_015694784.1 ruvB-like protein 1                                                                                                                      |
| TCONS_00024665 | 0.226067 | 0.174201   | 0.844726     | BGIOSGA021762 | XP_004956145.1E3 ubiquitin-protein ligase At1g12760 isoform X2                                                                                          |
| TCONS_00023628 | 0.226176 | 0.811381   | 0.196024     | BGIOSGA014528 | XP_006645587.1 transcription factor MYB1R1-like                                                                                                         |
| TCONS_00002987 | 0.226729 | -0.388309  | 0.385803     | BGIOSGA015052 | XP_006649443.1 pentatricopeptide repeat-containing protein At3g23020                                                                                    |
| TCONS_00009370 | 0.227023 | 0.18489    | 0.400376     | BGIOSGA011922 | XP_006665031.1 CCR4-NOT transcription complex subunit 10                                                                                                |
| TCONS_00028557 | 0.227037 | 0.35968    | 0.165876     | BGIOSGA030302 | XP_006664812.1 sedoheptulose-1,7-bisphosphatase, chloroplastic                                                                                          |
| TCONS_00015495 | 0.227051 | -0.0318318 | -1.51794     | BGIOSGA009376 |                                                                                                                                                         |

## transcriptome

|                |          |            |            |               |                                                                                                     |
|----------------|----------|------------|------------|---------------|-----------------------------------------------------------------------------------------------------|
| TCONS_00030269 | 0.227111 | 0.543789   | 0.229253   | BGIOSGA026696 | XP_003578332.1 uncharacterized protein<br>LOC100825556                                              |
| TCONS_00003568 | 0.227204 | 0.880217   | 0.49909    | BGIOSGA003530 | XP_015699158.1 cullin-1-like                                                                        |
| TCONS_00008230 | 0.227277 | -0.149393  | -0.481772  | BGIOSGA014948 | XP_006648773.1 CMP-sialic acid transporter 5<br>XP_004957935.1 transcription factor ILR3 isoform X1 |
| TCONS_00025279 | 0.227551 | -0.248164  | -0.0476172 | BGIOSGA027691 | XP_006644133.1 solute carrier family 25 member 44-like                                              |
| TCONS_00003475 | 0.22765  | 0.910506   | 1.01616    | BGIOSGA001747 | XP_015698135.1 HIRA-interacting protein 3 isoform X1                                                |
| TCONS_00033627 | 0.227879 | 0.352611   | 1.36081    | BGIOSGA017796 | XP_002458783.2 probable ubiquitin-like-specific protease 2B                                         |
| TCONS_00017321 | 0.227911 | -0.382747  | 0.421719   | BGIOSGA019354 | XP_015689676.1 anaphase-promoting complex subunit 8-like                                            |
| TCONS_00006577 | 0.228053 | 0.160707   | -0.221852  | BGIOSGA023466 | XP_015689229.1 coatomer subunit beta'-2-like                                                        |
| TCONS_00007590 | 0.228055 | 0.726985   | 0.494377   | BGIOSGA021944 | XP_003563670.1 uncharacterized protein<br>At2g34160                                                 |
| TCONS_00020992 | 0.228284 | 0.497106   | 1.1496     | BGIOSGA006921 | XP_015691572.1 oxygen-dependent coproporphyrinogen-III oxidase, chloroplastic                       |
| TCONS_00014909 | 0.228367 | 0.403122   | 1.10034    | BGIOSGA025594 | XP_006661064.1 hexose carrier protein HEX6-like                                                     |
| TCONS_00028655 | 0.228667 | 1.27443    | 0.10499    | BGIOSGA033440 | XP_006646983.1 two-component response regulator ORR24                                               |
| TCONS_00007469 | 0.228674 | 0.638168   | 0.239974   | BGIOSGA017560 | XP_004973930.1 sericin 1                                                                            |
| TCONS_00035430 | 0.228751 | 0.494825   | -0.344098  | BGIOSGA036840 | XP_004979380.1 uncharacterized protein<br>LOC101755097                                              |
| TCONS_00034961 | 0.229242 | 0.0754575  | 0.16086    | BGIOSGA016610 | XP_006659400.1 PREDICTED: uncharacterized protein<br>LOC102706119                                   |
| TCONS_00026606 | 0.229492 | -0.449991  | -1.70643   | BGIOSGA030667 | XP_015692596.1 PREDICTED: uncharacterized protein<br>At4g15545                                      |
| TCONS_00017789 | 0.22959  | -0.51992   | -0.75666   | BGIOSGA028709 | XP_006654545.1 probable inactive receptor kinase<br>At5g58300                                       |
| TCONS_00019503 | 0.229626 | -3.35814   | 0.0920989  | BGIOSGA019120 | XP_015698966.1 protein transport protein Sec24-like<br>At3g07100                                    |
| TCONS_00013661 | 0.229676 | 0.907054   | 0.74457    | BGIOSGA015821 | NP_001136644.1 putative NAC domain transcription factor superfamily protein                         |
| TCONS_00017838 | 0.229758 | 1.02267    | -0.664683  | BGIOSGA016546 | XP_006665092.1 mitochondrial phosphate carrier protein 3, mitochondrial-like                        |
| TCONS_00008868 | 0.229957 | 0.672236   | 0.876439   | BGIOSGA030895 | XP_008656895.1 tafazzin homolog                                                                     |
| TCONS_00005026 | 0.230063 | 1.12197    | 1.12834    | BGIOSGA000192 | YP_008815741.1 RNA polymerase beta subunit (plastid)                                                |
| TCONS_00017487 | 0.230113 | 0.827006   | -0.540945  | BGIOSGA040239 | XP_006655822.1 E4 SUMO-protein ligase PIAL2-like                                                    |
| TCONS_00021676 | 0.230146 | 0.72259    | 1.02552    | BGIOSGA021843 | XP_012704051.1 hydroquinone glucosyltransferase                                                     |
| TCONS_00035140 | 0.230172 | 0.764939   | -0.837642  | BGIOSGA006807 | XP_002453098.1 homoserine kinase                                                                    |
| TCONS_00007163 | 0.230214 | 2.03932    | 1.34155    | BGIOSGA009350 | XP_024319049.1 putative disease resistance RPP13-like protein 3 isoform X1                          |
| TCONS_00035035 | 0.230272 | -0.0590228 | -0.278303  | BGIOSGA029913 | XP_015690245.1 probable uridine nucleosidase 2 isoform X2                                           |
| TCONS_00012484 | 0.230349 | 0.267941   | 0.0614742  | BGIOSGA026495 | XP_006647203.1 dnaJ homolog subfamily B member 4-like                                               |
| TCONS_00005905 | 0.230389 | -1.38926   | -0.551895  | BGIOSGA019109 | XP_006664225.1 methionine aminopeptidase 2B-like                                                    |
| TCONS_00036474 | 0.230544 | -0.456072  | 0.676409   | BGIOSGA026562 | XP_002448464.1 maltose excess protein 1-like, chloroplastic                                         |
| TCONS_00016556 | 0.230579 | 0.696754   | 0.233724   | BGIOSGA019865 | XP_006658336.1 PREDICTED: uncharacterized protein<br>LOC102706211                                   |
| TCONS_00023222 | 0.230659 | -0.809238  | -1.14499   | BGIOSGA021415 | XP_006649035.2 probable alpha-mannosidase I MNS5 isoform X1                                         |
| TCONS_00006851 | 0.230666 | -0.925772  | 0.531372   | BGIOSGA009028 | XP_006660621.1 PREDICTED: uncharacterized protein<br>LOC102712385                                   |
| TCONS_00028990 | 0.230731 | -0.508407  | 0.22798    | BGIOSGA009044 | XP_006664846.1 heterogeneous nuclear ribonucleoprotein R-like                                       |
| TCONS_00032928 | 0.230804 | 0.412983   | 0.380444   | BGIOSGA036957 | XP_021303864.1 jacalin-related lectin 3                                                             |
| TCONS_00018096 | 0.230823 | 0.252129   | 0.350721   | BGIOSGA001216 | XP_006644833.1 PREDICTED: uncharacterized protein<br>LOC102706146 isoform X2                        |
| TCONS_00004546 | 0.230942 | 1.53529    | 1.19095    | BGIOSGA030700 | XP_015698548.1 PREDICTED: uncharacterized protein<br>LOC102708669                                   |
| TCONS_00036310 | 0.231317 | -0.19101   | -0.169875  | BGIOSGA030881 | XP_015695499.1 transaldolase                                                                        |
| TCONS_00027363 | 0.231465 | 0.666772   | 0.119518   | BGIOSGA023471 | XP_003558468.1 cytochrome P450 94B3                                                                 |
| TCONS_00011813 | 0.231515 | 1.13805    | -1.98979   | BGIOSGA011824 | XP_006659758.1 E3 ubiquitin-protein ligase CHIP                                                     |
| TCONS_00025808 | 0.231773 | -0.903157  | -0.12576   | BGIOSGA018974 | XP_006657590.1 mRNA-decapping enzyme-like protein                                                   |
| TCONS_00023428 | 0.231872 | 0.191355   | -0.252316  | BGIOSGA009490 | XP_015692866.1 NADH dehydrogenase [ubiquinone] iron-sulfur protein 7, mitochondrial                 |
| TCONS_00018190 | 0.231938 | 1.34647    | 0.196916   | BGIOSGA024924 | XP_006663446.2 protein transport protein Sec24-like<br>CEF                                          |
| TCONS_00033465 | 0.232088 | 1.31953    | 0.52746    | BGIOSGA035264 | NP_197399.1 ARM repeat superfamily protein                                                          |
| TCONS_00032531 | 0.232118 | -0.592673  | 0.653253   | BGIOSGA033244 | XP_015699175.1 brassinosteroid LRR receptor kinase                                                  |
| TCONS_00004302 | 0.23215  | -0.283009  | 0.133144   | BGIOSGA019255 | XP_015698526.1 FAS1 domain-containing protein<br>SELMODRAFT_448915-like                             |
| TCONS_00035789 | 0.232277 | -0.132064  | 0.189452   | BGIOSGA037192 | XP_004960737.1 adenyl/sulfatase HINT3                                                               |
| TCONS_00035785 | 0.232474 | 0.165705   | 0.490808   | BGIOSGA037188 | XP_006648170.2 probable cytosolic oligopeptidase A                                                  |
| TCONS_00009090 | 0.232592 | -0.704521  | 0.351451   | BGIOSGA016783 | XP_006662651.1 ubiquitin-activating enzyme E1 2                                                     |
| TCONS_00034125 | 0.232811 | 1.76636    | 0.451252   | BGIOSGA010930 | XP_006656908.2 transmembrane protein 245                                                            |
| TCONS_00020563 | 0.232843 | 0.544161   | 0.920005   | BGIOSGA029004 | XP_006645029.1 probable anion transporter 3, chloroplastic                                          |
| TCONS_00004738 | 0.232992 | 0.847535   | 0.935892   | BGIOSGA000477 | XP_006661028.1 kinesin-like protein BC2 isoform X2                                                  |
| TCONS_00028540 | 0.233031 | 0.0337616  | 0.17077    | BGIOSGA016174 |                                                                                                     |

## transcriptome

|                |          |                |            |               |                                                                                     |
|----------------|----------|----------------|------------|---------------|-------------------------------------------------------------------------------------|
| TCONS_00003670 | 0.233245 | 0.656118       | 0.914157   | BGIOSGA017752 | XP_004951295.1 ribosome production factor 2 homolog                                 |
| TCONS_00010956 | 0.233377 | 0.250322       | 0.66351    | BGIOSGA029308 | XP_015690897.1 SRSF protein kinase 2-like                                           |
| TCONS_00023217 | 0.233427 | <b>1.61836</b> | 0.934819   | BGIOSGA020583 | XP_015695296.1 pyruvate kinase isozyme A, chloroplastic                             |
| TCONS_00029939 | 0.233436 | 0.130169       | -0.497892  | BGIOSGA005088 | XP_014758816.1 uncharacterized protein LOC100844622                                 |
| TCONS_00024263 | 0.233519 | -3.67796       | -1.39862   | BGIOSGA020554 | XP_006658910.1 PREDICTED: uncharacterized protein LOC102714663, partial             |
| TCONS_00001140 | 0.233565 | 0.958418       | 1.00897    | BGIOSGA021527 | XP_015689015.1 pentatricopeptide repeat-containing protein At1g10910, chloroplastic |
| TCONS_00018418 | 0.233624 | 1.2073         | 0.797877   | BGIOSGA020249 | XP_002440366.1 RGG repeats nuclear RNA binding protein A                            |
| TCONS_00013181 | 0.233667 | 0.0933739      | 0.56348    | BGIOSGA009803 | XP_006651826.1 transcriptional adapter ADA2                                         |
| TCONS_00029075 | 0.233939 | -0.127696      | 0.224164   | BGIOSGA011595 | XP_004967752.1 putative protease Do-like 14 isoform X1                              |
| TCONS_00007323 | 0.233971 | -0.302088      | 0.292098   | BGIOSGA023696 | XP_006646868.1 protein PHR1-LIKE 1-like                                             |
| TCONS_00037609 | 0.23403  | 0.460519       | 0.496141   | BGIOSGA035752 | XP_006664244.1 pentatricopeptide repeat-containing protein At1g74750-like           |
| TCONS_00013597 | 0.234351 | 0.530293       | -0.345779  | BGIOSGA015750 | XP_006652066.2 phosphoglycerate mutase-like protein 1                               |
| TCONS_00025511 | 0.23442  | <b>1.27114</b> | -0.0164362 | BGIOSGA036514 | NP_001144833.2 uncharacterized protein LOC100277918                                 |
| TCONS_00004994 | 0.234483 | 0.785482       | 1.06905    | BGIOSGA014021 | XP_006646625.1 uncharacterized WD repeat-containing protein C17D11.16-like          |
| TCONS_00023311 | 0.234734 | 0.834361       | 1.08603    | BGIOSGA025354 | XP_015694556.1 PREDICTED: uncharacterized protein LOC102719882, partial             |
| TCONS_00025677 | 0.234737 | 0.534273       | 0.926794   | BGIOSGA023746 | NP_001149561.1 adenyl cyclase                                                       |
| TCONS_00024144 | 0.234766 | -0.238051      | 0.153514   | BGIOSGA026181 | XP_015694737.1 PREDICTED: uncharacterized protein LOC102720347                      |
| TCONS_00034411 | 0.234809 | -1.5994        | -2.02699   | BGIOSGA025012 | XP_003577776.1 dirigent protein 21                                                  |
| TCONS_00009826 | 0.235004 | -5.31573       | -1.59271   | BGIOSGA017809 | XP_004984832.1 probable glucuronosyltransferase Os03g0287800                        |
| TCONS_00005053 | 0.235062 | 0.148151       | -0.0150802 | BGIOSGA010119 | XP_006645299.1 vesicle-associated protein 2-2-like                                  |
| TCONS_00037017 | 0.235181 | 0.652359       | 0.18319    | BGIOSGA015096 | XP_003577844.1 cysteine desulfurase 1, chloroplastic                                |
| TCONS_00007477 | 0.23533  | -0.0735889     | 0.297182   | BGIOSGA035426 | XP_006648383.2 protein S-acyltransferase 24-like                                    |
| TCONS_00012418 | 0.235331 | -2.33832       | 0.437901   | BGIOSGA009348 | XP_015690747.1 sucrose synthase 1                                                   |
| TCONS_00030354 | 0.2354   | 0.10312        | -0.488024  | BGIOSGA029445 | XP_006660846.1 proteasome subunit beta type-4-like                                  |
| TCONS_00034790 | 0.235504 | -0.625584      | -0.604233  | BGIOSGA026166 | XP_015697653.1 DIMBOA UDP-glucosyltransferase BX8-like                              |
| TCONS_00015576 | 0.235578 | -0.197777      | -1.10784   | BGIOSGA003049 | XP_015691398.1 transcription factor bHLH35-like                                     |
| TCONS_00007906 | 0.235756 | 0.1809         | 0.103543   | BGIOSGA006571 | XP_015688979.1 PREDICTED: uncharacterized protein LOC102710561                      |
| TCONS_00035713 | 0.235841 | -0.311655      | 0.136171   | BGIOSGA037127 | XP_015698177.1 tRNA pseudouridine synthase A                                        |
| TCONS_00011790 | 0.236338 | -0.661614      | -0.806167  | BGIOSGA007563 | XP_006649633.1 GDP-mannose transporter GONST3 isoform X1                            |
| TCONS_00016149 | 0.236622 | -0.376075      | -2.41431   | BGIOSGA030128 | XP_006652446.1 phosphoglycolate phosphatase 1B, chloroplastic-like                  |
| TCONS_00007244 | 0.236712 | -0.623091      | -0.0586325 | BGIOSGA007243 | XP_003573378.1 protein trichome birefringence-like 12 isoform X2                    |
| TCONS_00005970 | 0.236763 | -0.100687      | -0.324811  | BGIOSGA008105 | XP_006664825.1 fruit protein pKIWI502                                               |
| TCONS_00018186 | 0.236891 | -0.284674      | 0.393579   | BGIOSGA028831 | XP_008656482.1 uncharacterized LOC103635877 isoform X1                              |
| TCONS_00023350 | 0.236914 | -0.490341      | 0.518471   | BGIOSGA036394 | XP_015694828.1 nucleolar protein 58                                                 |
| TCONS_00030468 | 0.236957 | -0.680489      | -0.257121  | BGIOSGA019449 | XP_006660924.2 enoyl-CoA hydratase 2, peroxisomal-like                              |
| TCONS_00021949 | 0.237134 | -0.652769      | -0.912837  | BGIOSGA003624 | XP_006655954.2 chaperone protein dnaJ 16 isoform X1                                 |
| TCONS_00020609 | 0.237185 | -0.257142      | -2.81992   | BGIOSGA002943 | NP_001148747.1 carboxyl-terminal-processing protease                                |
| TCONS_00036992 | 0.237213 | 0.398163       | 0.376105   | BGIOSGA010119 | XP_006664489.1 U-box domain-containing protein 44-like                              |
| TCONS_00016884 | 0.237253 | 0.174089       | 0.229141   | BGIOSGA014080 | XP_003561788.1 uncharacterized protein LOC100834768                                 |
| TCONS_00005711 | 0.237399 | 0.188102       | -0.534374  | BGIOSGA009352 | XP_015689247.1 monosaccharide-sensing protein 2-like                                |
| TCONS_00016491 | 0.237405 | -0.0815216     | 0.220894   | BGIOSGA014478 | XP_002448399.1 protein MULTIPLE CHLOROPLAST DIVISION SITE 1                         |
| TCONS_00014939 | 0.237408 | 0.539332       | 0.721321   | BGIOSGA008003 | XP_006652825.1 APO protein 1, chloroplastic                                         |
| TCONS_00022309 | 0.237435 | 0.635223       | 0.323809   | BGIOSGA021173 | XP_006656123.1 HEAT repeat-containing protein 5B isoform X2                         |
| TCONS_00014878 | 0.237578 | 0.187336       | -0.441694  | BGIOSGA017056 | XP_015692138.1 thylakoid luminal 29 kDa protein, chloroplastic                      |
| TCONS_00012247 | 0.237939 | 0.722423       | 0.303533   | BGIOSGA026376 | XP_006650064.1 60S ribosomal protein L22-2                                          |
| TCONS_00033173 | 0.237942 | <b>1.43195</b> | 0.622822   | BGIOSGA034500 | XP_006662826.1 pyruvate kinase 1, cytosolic-like                                    |
| TCONS_00023915 | 0.238207 | 0.172106       | 0.677367   | BGIOSGA011986 | XP_006657838.1 protein FAR1-RELATED SEQUENCE 5-like isoform X1                      |
| TCONS_00035518 | 0.23827  | 0.809456       | 0.53673    | BGIOSGA036683 | XP_004975322.2F-box protein At2g02240                                               |
| TCONS_00035281 | 0.238337 | 1.74782        | 0.802421   | BGIOSGA022793 | XP_006663078.1 sodium/hydrogen exchanger 2-like                                     |
| TCONS_00004684 | 0.238375 | <b>1.68752</b> | 0.271197   | BGIOSGA022005 | XP_006644974.1 protein GPR107-like                                                  |
| TCONS_00014581 | 0.238762 | 0.499209       | 0.00916734 | BGIOSGA016745 | XP_015692228.1 PREDICTED: uncharacterized protein LOC102701164 isoform X1           |
| TCONS_00002795 | 0.238808 | -0.0927786     | 0.404164   | BGIOSGA021572 | XP_006643737.2 probable zinc metalloprotease EGY2, chloroplastic isoform X1         |
| TCONS_00010976 | 0.239019 | -0.558338      | -0.281596  | BGIOSGA013579 | XP_015690483.1 cytochrome b5 isoform A                                              |
| TCONS_00014707 | 0.239175 | -0.338575      | 0.559683   | BGIOSGA019751 | XP_021318866.1 dnaJ protein homolog 2 isoform X1                                    |

transcriptome

|                |          |            |            |               |                                                                                          |
|----------------|----------|------------|------------|---------------|------------------------------------------------------------------------------------------|
| TCONS_00012771 | 0.239264 | -0.186216  | 1.47452    | BGIOSGA010193 | XP_006651617.2 CBL-interacting protein kinase 7                                          |
| TCONS_00000905 | 0.239856 | 0.1473     | 0.0161149  | BGIOSGA003494 | XP_006644159.1 probable phosphoinositide phosphatase SAC9                                |
| TCONS_00032902 | 0.239937 | -0.631163  | 1.01206    | BGIOSGA010845 | XP_006663783.1 alpha-L-arabinofuranosidase 1-like                                        |
| TCONS_00007463 | 0.239979 | 0.457869   | 0.776002   | BGIOSGA009314 | XP_006646977.1 ubiquitin carboxyl-terminal hydrolase 2-like                              |
| TCONS_00024416 | 0.240451 | 0.880313   | -0.148633  | BGIOSGA003356 | XP_004958813.1 probable serine/threonine-protein kinase PBL7                             |
| TCONS_00023566 | 0.240638 | 0.288697   | 0.201546   | BGIOSGA038908 | XP_024312958.1 histone-lysine N-methyltransferase family member SUVH2                    |
| TCONS_00020397 | 0.240695 | 1.01742    | 0.599582   | BGIOSGA008486 | XP_006655940.1 beta-1,3-galactosyltransferase 15                                         |
| TCONS_00006028 | 0.240871 | -0.720413  | -0.424897  | BGIOSGA008180 | XP_015688588.1 phosphatidylcholine transfer protein-like                                 |
| TCONS_00018172 | 0.240952 | 0.0179357  | -0.370176  | BGIOSGA031102 | XP_006654678.2 anthocyanidin 5,3-O-glucosyltransferase-like                              |
| TCONS_00014180 | 0.240965 | -0.0246394 | -0.273856  | BGIOSGA008338 | XP_015691440.1 chaperone protein ClpD2, chloroplastic                                    |
| TCONS_00025059 | 0.241149 | -0.584457  | -1.70572   | BGIOSGA033261 | XP_006658538.2 5-pentadecatrienyl resorcinol O-methyltransferase-like                    |
| TCONS_00029029 | 0.241191 | 0.591957   | 0.257988   | BGIOSGA030782 | XP_006661248.1 protein SPA, chloroplastic                                                |
| TCONS_00008368 | 0.241359 | 1.26619    | 1.09683    | BGIOSGA014778 | XP_003575344.1 muscle M-line assembly protein unc-89                                     |
| TCONS_00010422 | 0.241623 | -0.122436  | 0.0688711  | BGIOSGA015602 | XP_003562339.1 uncharacterized protein LOC100821889                                      |
| TCONS_00006448 | 0.241625 | 0.195984   | 1.13806    | BGIOSGA016723 | XP_006647508.1 trafficking protein particle complex subunit 2-like                       |
| TCONS_00007281 | 0.241696 | -0.127205  | 0.302828   | BGIOSGA007202 | XP_021314708.1 uncharacterized protein LOC8055087 isoform X1                             |
| TCONS_00003251 | 0.241987 | 0.953746   | 0.282074   | BGIOSGA001965 | XP_015688280.1 zinc finger CCCH domain-containing protein 4                              |
| TCONS_00000467 | 0.242191 | -0.465476  | 0.420982   | BGIOSGA003041 | XP_006643934.1 U11/U12 small nuclear ribonucleoprotein 59 kDa protein                    |
| TCONS_00007398 | 0.242207 | 2.25092    | 1.99712    | BGIOSGA030447 | XP_021319296.1 uncharacterized protein LOC8064466                                        |
| TCONS_00019762 | 0.242262 | 0.744835   | 0.464      | BGIOSGA013444 | XP_006654761.1 dynamin-related protein 5A                                                |
| TCONS_00010074 | 0.242263 | -0.880222  | 0.419498   | BGIOSGA012619 | XP_006650084.2 SAC3 family protein C                                                     |
| TCONS_00014321 | 0.242377 | -0.464418  | -0.0694154 | BGIOSGA016485 | XP_006652331.1 sm-like protein LSM1B                                                     |
| TCONS_00023882 | 0.24239  | -0.45364   | -0.375343  | BGIOSGA025913 | XP_006657814.1 probable V-type proton ATPase subunit H                                   |
| TCONS_00024626 | 0.242711 | 1.03675    | 1.32957    | #N/A          | #N/A                                                                                     |
| TCONS_00005401 | 0.242942 | 0.437071   | 0.409075   | BGIOSGA007511 | XP_015689514.1 nuclear pore complex protein NUP160                                       |
| TCONS_00008651 | 0.242954 | -0.0740095 | -1.6436    | BGIOSGA030195 | XP_006647757.2 DNA-binding protein SMUBP-2-like                                          |
| TCONS_00013923 | 0.243738 | 0.00626117 | 0.420892   | BGIOSGA016100 | XP_010239753.1 protein TRANSPARENT TESTA 9 isoform X1                                    |
| TCONS_00022853 | 0.243801 | -0.0508152 | 0.410887   | BGIOSGA008415 | NP_001168499.1 uncharacterized LOC100275318                                              |
| TCONS_00010910 | 0.243863 | 0.826661   | 0.662415   | BGIOSGA013523 | XP_015690525.1 telomerase Cajal body protein 1                                           |
| TCONS_00017240 | 0.243866 | 1.60128    | 1.48641    | BGIOSGA002892 | XP_006654112.1 heat shock 70 kDa protein 15-like                                         |
| TCONS_00010059 | 0.24396  | 0.956737   | 0.0664634  | BGIOSGA019712 | XP_015690196.1 serine/arginine-rich-splicing factor SR34-like isoform X1                 |
| TCONS_00000765 | 0.244192 | 0.126195   | 0.640494   | BGIOSGA003462 | XP_006644118.1 dual specificity protein phosphatase PHS1-like                            |
| TCONS_00006113 | 0.244567 | 0.647389   | 0.392083   | BGIOSGA008269 | XP_015689097.1 PREDICTED: uncharacterized protein LOC107303603                           |
| TCONS_00010507 | 0.244712 | -0.220715  | -0.158792  | BGIOSGA013117 | XP_006650276.1 protein tas                                                               |
| TCONS_00004071 | 0.244815 | -0.497331  | 0.360909   | #N/A          | #N/A                                                                                     |
| TCONS_00022180 | 0.244937 | 0.946484   | 0.434235   | BGIOSGA001783 | XP_006656939.2 protein tesmin/TSO1-like CXC 7 isoform X2                                 |
| TCONS_00004363 | 0.245278 | 1.19191    | 0.593906   | BGIOSGA013704 | XP_015692745.1 probable glutamate carboxypeptidase 2                                     |
| TCONS_00021252 | 0.245468 | 0.00856641 | 0.447033   | BGIOSGA023478 | XP_006656388.1 uncharacterized vacuolar membrane protein YML018C                         |
| TCONS_00010554 | 0.245569 | 0.00921184 | -0.620617  | BGIOSGA022429 | XP_015691147.1 protein DA1-related 1-like                                                |
| TCONS_00011364 | 0.245578 | 2.69382    | 2.12129    | BGIOSGA013978 | XP_015691126.1 pentatricopeptide repeat-containing protein At5g46580, chloroplastic      |
| TCONS_00002210 | 0.246057 | -1.18577   | 1.29126    | BGIOSGA004844 | XP_008674794.1 uncharacterized protein LOC103650976                                      |
| TCONS_00017616 | 0.246097 | 1.01112    | 0.803337   | BGIOSGA013496 | XP_015692561.1 pentatricopeptide repeat-containing protein At3g62470, mitochondrial-like |
| TCONS_00011219 | 0.246126 | -1.24152   | 0.087024   | BGIOSGA024257 | XP_015690543.1 amino acid transporter ANT1-like                                          |
| TCONS_00003002 | 0.246127 | 0.0271352  | -0.540473  | BGIOSGA002421 | XP_006643865.1 transcription factor MYB1R1-like                                          |
| TCONS_00022540 | 0.246185 | 0.470148   | 0.937338   | BGIOSGA000070 | XP_006656235.1 E3 ubiquitin-protein ligase RGLG2-like                                    |
| TCONS_00026247 | 0.246421 | -0.326444  | -0.385796  | BGIOSGA028329 | XP_006659266.1 lactation elevated protein 1-like                                         |
| TCONS_00017594 | 0.246924 | 0.296484   | 0.80007    | BGIOSGA025813 | XP_006655213.1 sorting nexin 2B                                                          |
| TCONS_00012611 | 0.247206 | 1.32579    | 0.00853645 | BGIOSGA010364 | XP_006650274.1 secretory carrier-associated membrane protein 4                           |
| TCONS_00005197 | 0.247245 | 0.700732   | 0.57203    | BGIOSGA000009 | XP_025015759.1 vacuolar fusion protein MON1 homolog                                      |
| TCONS_00029345 | 0.247261 | -2.86447   | -0.243263  | BGIOSGA031094 | XP_010069234.1 PREDICTED: uncharacterized protein LOC104456191                           |
| TCONS_00009237 | 0.24735  | -1.47007   | -0.660836  | BGIOSGA011767 | XP_006649325.1 phosphatidylinositol-glycan biosynthesis class F protein                  |
| TCONS_00018723 | 0.247512 | -0.890385  | -1.01205   | BGIOSGA016635 | XP_010231650.1 acyl transferase 7                                                        |



## transcriptome

|                |          |            |            |               |                                                                                       |
|----------------|----------|------------|------------|---------------|---------------------------------------------------------------------------------------|
| TCONS_00024788 | 0.247695 | -0.0882944 | 0.796877   | BGIOSGA024578 | XP_015694572.1 F-box/FBD/LRR-repeat protein At4g00160-like                            |
| TCONS_00034103 | 0.248057 | 0.590457   | 0.851995   | BGIOSGA005292 | XP_006663135.1 mitochondrial uncoupling protein 1-like                                |
| TCONS_00032677 | 0.248132 | 0.275124   | 0.876315   | BGIOSGA031431 | XP_006662043.1 putative pre-16S rRNA nuclease                                         |
| TCONS_00021330 | 0.248134 | -0.529601  | -0.91573   | BGIOSGA007152 | XP_015693699.1 L-arabinokinase-like                                                   |
| TCONS_00035788 | 0.248178 | 0.581032   | 0.339526   | BGIOSGA037191 | XP_006663920.1 MAG2-interacting protein 2                                             |
| TCONS_00006834 | 0.248355 | 0.869392   | 0.313754   | BGIOSGA016577 | XP_006647856.1 probable RNA-dependent RNA polymerase 1                                |
| TCONS_00010066 | 0.248422 | 0.357381   | 0.829445   | BGIOSGA012609 | XP_006650074.1 nuclear cap-binding protein subunit 1                                  |
| TCONS_00000047 | 0.248428 | 1.03467    | 0.425295   | BGIOSGA000169 | XP_015699329.1PREDICTED: uncharacterized protein LOC102716464 isoform X2              |
| TCONS_00035187 | 0.248491 | 0.355767   | 0.0339848  | BGIOSGA007472 | XP_006663049.1 proteasome subunit alpha type-5                                        |
| TCONS_00001627 | 0.248504 | 0.124112   | -0.246881  | BGIOSGA004261 | XP_015689667.1PREDICTED: uncharacterized protein LOC102706990, partial                |
| TCONS_00004714 | 0.248739 | -0.694445  | -1.87454   | BGIOSGA009301 | XP_002458750.1probable protein S-acyltransferase 16 isoform X1                        |
| TCONS_00003898 | 0.248902 | 0.405653   | -0.423093  | BGIOSGA016764 | XP_004969036.1cytokinin riboside 5'-monophosphate phosphoribohydrolase LOG isoform X1 |
| TCONS_00036641 | 0.24898  | -0.0763035 | 0.65077    | BGIOSGA034534 | XP_006650867.1 nicotinate phosphoribosyltransferase 2-like                            |
| TCONS_00011294 | 0.248985 | -1.13853   | -0.852335  | BGIOSGA016430 | XP_015689570.1 receptor-like serine/threonine-protein kinase ALE2 isoform X1          |
| TCONS_00009038 | 0.249268 | 0.38159    | 0.606081   | BGIOSGA009787 | XP_006644035.1 26S proteasome non-ATPase regulatory subunit 14 homolog                |
| TCONS_00000633 | 0.24938  | 0.726345   | 0.670255   | BGIOSGA020576 | XP_015696561.1PREDICTED: uncharacterized protein LOC102701201                         |
| TCONS_00030536 | 0.249414 | -0.228023  | 0.321397   | BGIOSGA009729 | XP_006662014.1 calcium-dependent protein kinase isoform 1                             |
| TCONS_00031557 | 0.249696 | -2.93315   | 0.554672   | BGIOSGA024780 | XP_015697462.1 scarecrow-like protein 21                                              |
| TCONS_00032079 | 0.249872 | -0.042112  | -0.708305  | BGIOSGA026022 | XP_015693615.1 probable phospholipid-transporting ATPase 4                            |
| TCONS_00020894 | 0.249994 | 0.00193097 | -0.556714  | BGIOSGA001895 | XP_006646462.2 ankyrin repeat-containing protein At3g12360-like                       |
| TCONS_00004685 | 0.250351 | 0.506662   | 1.53103    | BGIOSGA012354 | XP_002461325.1probable inactive purple acid phosphatase 2                             |
| TCONS_00023000 | 0.250535 | 1.86021    | 0.874528   | BGIOSGA025031 | XP_004965173.1ribonucleoside-diphosphate reductase small chain                        |
| TCONS_00022008 | 0.250788 | 1.50808    | -0.14267   | BGIOSGA021510 | XP_006656492.1 probable magnesium transporter NIPA6                                   |
| TCONS_00022912 | 0.250896 | 0.656469   | 0.535132   | BGIOSGA014027 | XP_015691337.1PREDICTED: uncharacterized protein LOC102709267                         |
| TCONS_00014261 | 0.250984 | 0.248366   | -0.179037  | BGIOSGA016418 | XP_006653946.1 ras-related protein RABA2a-like                                        |
| TCONS_00023006 | 0.2512   | 0.0113665  | -0.947373  | #N/A          | #N/A                                                                                  |
| TCONS_00016960 | 0.251226 | -0.0655433 | -0.0912859 | BGIOSGA031780 | XP_006662980.1 actin-related protein 2/3 complex subunit 5A-like                      |
| TCONS_00033663 | 0.25138  | 1.16665    | 0.812555   | BGIOSGA033803 | XP_006644833.1PREDICTED: uncharacterized protein LOC102706146 isoform X2              |
| TCONS_00004544 | 0.25157  | -0.330347  | 0.752166   | BGIOSGA000663 | XP_006646847.1 sec-independent protein translocase protein TATB, chloroplastic-like   |
| TCONS_00035091 | 0.25189  | 0.70899    | 1.20152    | BGIOSGA016888 | XP_015688971.1 kinesin-like protein KIF18A                                            |
| TCONS_00007187 | 0.252016 | -0.321351  | 0.904429   | BGIOSGA007311 | XP_004959898.1ricin B-like lectin R40G2                                               |
| TCONS_00024369 | 0.252273 | 1.49813    | 0.0237989  | BGIOSGA012543 | XP_006659382.1PREDICTED: uncharacterized protein LOC102700820                         |
| TCONS_00026565 | 0.252607 | -0.570833  | -0.0640313 | BGIOSGA030601 | XP_004978786.1F-box/LRR-repeat protein At3g26922                                      |
| TCONS_00034496 | 0.252609 | 0.411078   | 0.649801   | BGIOSGA017645 | XP_006644869.1 UDP-glycosyltransferase 87A1-like                                      |
| TCONS_00002012 | 0.25271  | 0.556889   | -0.469362  | BGIOSGA033307 | XP_003570284.1probable serine incorporator                                            |
| TCONS_00008954 | 0.252807 | 0.37534    | -0.0131338 | BGIOSGA010446 | XP_004971138.1probable glucuronosyltransferase Os01g0926700                           |
| TCONS_00005007 | 0.252848 | -2.23744   | -0.943637  | BGIOSGA000214 | XP_015693827.1 lipid transfer-like protein VAS                                        |
| TCONS_00021265 | 0.252887 | 1.27359    | 0.85481    | BGIOSGA023591 | XP_006643748.1 glucose-induced degradation protein 4 homolog isoform X1               |
| TCONS_00012933 | 0.253135 | -0.203221  | 0.4937     | BGIOSGA027572 | XP_023156179.1uncharacterized LOC103644136 isoform X3                                 |
| TCONS_00013285 | 0.25319  | -0.739427  | -0.132141  | BGIOSGA006186 | XP_015689229.1 coatomer subunit beta'-2-like                                          |
| TCONS_00007589 | 0.253196 | 0.178025   | 0.123796   | BGIOSGA021944 | XP_006660108.1 aminopeptidase M1-B                                                    |
| TCONS_00026557 | 0.253452 | 0.568094   | 0.483236   | BGIOSGA007797 | XP_006649385.1 cysteine-tRNA ligase, chloroplastic/mitochondrial-like                 |
| TCONS_00011547 | 0.25351  | -0.0803369 | 0.36125    | BGIOSGA033086 | XP_006649333.1 poly(A) polymerase I-like isoform X1                                   |
| TCONS_00011509 | 0.253532 | 0.816093   | 0.637133   | BGIOSGA011518 | XP_006648990.1 trafficking protein particle complex subunit 11                        |
| TCONS_00006746 | 0.25358  | 0.195469   | 0.432174   | BGIOSGA008914 | XP_006647995.1 replication protein A 70 kDa DNA-binding subunit A                     |
| TCONS_00008911 | 0.254027 | 0.84779    | 0.481584   | BGIOSGA020721 | XP_006664296.1 probable arabinosyltransferase ARAD1                                   |
| TCONS_00034211 | 0.254325 | 0.353419   | -0.0103181 | BGIOSGA012537 | XP_021309867.1cysteine desulfurase, mitochondrial                                     |
| TCONS_00028797 | 0.254414 | 0.906687   | 0.428707   | BGIOSGA039316 | XP_008672950.160S ribosomal protein L18A isoform X1                                   |
| TCONS_00000543 | 0.254703 | -0.204522  | 0.424845   | BGIOSGA003125 | XP_006657962.2 protein STRUBBELIG-RECEPTOR FAMILY 7-like                              |
| TCONS_00024114 | 0.254781 | 0.146909   | 0.708668   | BGIOSGA026147 | XP_006659444.1 Golgi SNAP receptor complex member 1-1                                 |
| TCONS_00028071 | 0.254813 | 0.491762   | 0.440754   | BGIOSGA029760 | XP_015693691.1 fasciclin-like arabinogalactan protein 11                              |
| TCONS_00002870 | 0.254958 | #N/A       | -3.0995    | BGIOSGA020359 |                                                                                       |

## transcriptome

|                |          |            |            |               |                                                                                                                                                                                                                       |
|----------------|----------|------------|------------|---------------|-----------------------------------------------------------------------------------------------------------------------------------------------------------------------------------------------------------------------|
| TCONS_00033235 | 0.254959 | 0.980022   | 0.809023   | BGIOSGA029210 | XP_006662809.1PREDICTED: uncharacterized protein LOC102717289<br>XP_006649890.1 L-ascorbate peroxidase 1,                                                                                                             |
| TCONS_00009819 | 0.25516  | 2.02534    | 1.31083    | BGIOSGA029361 | cytosolic<br>XP_006656434.1 eukaryotic translation initiation factor 5-like<br>XP_006652988.2 phosphatidylinositol 4-kinase gamma 6-like                                                                              |
| TCONS_00022847 | 0.255264 | 1.05146    | 0.749758   | BGIOSGA030521 |                                                                                                                                                                                                                       |
| TCONS_00016827 | 0.25537  | 0.41024    | 1.27678    | BGIOSGA021439 |                                                                                                                                                                                                                       |
| TCONS_00002817 | 0.255667 | 0.869268   | 0.899954   | BGIOSGA002402 | XP_006655910.1 factor of DNA methylation 1-like<br>NP_001132564.1NAD(P)-binding Rossmann-fold superfamily protein                                                                                                     |
| TCONS_00016986 | 0.255821 | 0.963256   | 0.280817   | BGIOSGA028730 |                                                                                                                                                                                                                       |
| TCONS_00010142 | 0.255822 | 0.132018   | -0.0710836 | BGIOSGA012700 | XP_006650117.1 SWR1 complex subunit 6<br>XP_006649995.1 transcription factor HBP-1b(c38)-like                                                                                                                         |
| TCONS_00012161 | 0.256789 | 0.17461    | 0.25322    | BGIOSGA00624  |                                                                                                                                                                                                                       |
| TCONS_00037368 | 0.256923 | -0.71119   | 0.968737   | BGIOSGA036001 | XP_006664104.2 30S ribosomal protein S6<br>XP_010234983.1meiosis regulator and mRNA stability factor 1                                                                                                                |
| TCONS_00025586 | 0.256987 | -0.411568  | 0.916488   | BGIOSGA012719 |                                                                                                                                                                                                                       |
| TCONS_00036879 | 0.256987 | 0.765971   | -0.0478884 | BGIOSGA035954 | XP_006663912.1 diacylglycerol kinase 2<br>XP_006644742.1 aspartate aminotransferase, cytoplasmic                                                                                                                      |
| TCONS_00004440 | 0.257016 | 0.390595   | 0.464356   | BGIOSGA037315 | XP_015695961.1 malate dehydrogenase [NADP] 1, chloroplastic                                                                                                                                                           |
| TCONS_00027158 | 0.257023 | 0.440443   | -0.459445  | BGIOSGA029203 | XP_004977388.1probable WRKY transcription factor 62 isoform X1<br>XP_006644985.1 60S ribosomal protein L36-3-like                                                                                                     |
| TCONS_00029707 | 0.257049 | -1.14499   | 0.0559788  | BGIOSGA030113 |                                                                                                                                                                                                                       |
| TCONS_00004700 | 0.257071 | 0.203767   | 0.526139   | BGIOSGA019990 | XP_010547553.1 succinate dehydrogenase assembly factor 4, mitochondrial<br>XP_015694587.1PREDICTED: uncharacterized protein LOC102716431                                                                              |
| TCONS_00020155 | 0.257706 | 0.0331778  | 0.143588   | BGIOSGA022352 | XP_015698512.1 probable LRR receptor-like serine/threonine-protein kinase At1g06840<br>XP_004983649.1homeobox-leucine zipper protein HOX1 isoform X2<br>XP_015689813.1PREDICTED: uncharacterized protein LOC107303742 |
| TCONS_00024837 | 0.257741 | -0.0911059 | 0.811029   | BGIOSGA013870 |                                                                                                                                                                                                                       |
| TCONS_00005133 | 0.257854 | 0.21295    | 0.368529   | BGIOSGA020060 |                                                                                                                                                                                                                       |
| TCONS_00031629 | 0.258116 | 1.69165    | 0.688428   | BGIOSGA029853 |                                                                                                                                                                                                                       |
| TCONS_00009548 | 0.25812  | -0.201726  | -0.687522  | BGIOSGA001035 |                                                                                                                                                                                                                       |
| TCONS_00031441 | 0.258234 | -0.379372  | -0.27743   | BGIOSGA033256 | XP_024316224.1probable plastid-lipid-associated protein 10, chloroplastic isoform X2<br>XP_003569955.1WD repeat-containing protein 44                                                                                 |
| TCONS_00006519 | 0.258505 | -0.284375  | 0.225524   | BGIOSGA016806 |                                                                                                                                                                                                                       |
| TCONS_00011357 | 0.258685 | 0.397768   | 0.825348   | BGIOSGA013970 | XP_006650921.1 RNA-binding protein 34<br>XP_006644294.1 calcium permeable stress-gated cation channel 1                                                                                                               |
| TCONS_00003725 | 0.258715 | -0.614824  | -0.530821  | BGIOSGA031326 | XP_015688232.1 rab9 effector protein with kelch motifs-like isoform X3<br>NP_001136765.1putative RING zinc finger domain superfamily protein                                                                          |
| TCONS_00000732 | 0.258743 | #NA        | -3.3313    | BGIOSGA003333 |                                                                                                                                                                                                                       |
| TCONS_00009765 | 0.258953 | 1.00491    | 0.979969   | BGIOSGA007134 | XP_006650536.1 thioredoxin-like protein AAED1, chloroplastic                                                                                                                                                          |
| TCONS_00013111 | 0.259063 | 0.0948066  | -0.205247  | BGIOSGA009874 | XP_006656083.1 FKBP12-interacting protein of 37 kDa<br>XP_006664685.1 GDP-Man:Man(3)GlcNAc(2)-PP-Dol alpha-1,2-mannosyltransferase<br>XP_015697316.1PREDICTED: uncharacterized protein LOC102700656                   |
| TCONS_00022244 | 0.259081 | -0.371344  | 0.918203   | BGIOSGA021252 |                                                                                                                                                                                                                       |
| TCONS_00037432 | 0.259201 | -0.189362  | 0.130808   | BGIOSGA035932 | XP_004985910.1uncharacterized protein LOC101774065                                                                                                                                                                    |
| TCONS_00032723 | 0.25925  | 0.434989   | 0.767025   | BGIOSGA031384 |                                                                                                                                                                                                                       |
| TCONS_00009220 | 0.259375 | 1.85549    | 0.230443   | BGIOSGA018003 |                                                                                                                                                                                                                       |
| TCONS_00019133 | 0.25958  | -0.0194462 | 0.606621   | BGIOSGA001808 | XP_010231510.160S ribosomal protein L29-1<br>XP_015691276.1 E3 ubiquitin-protein ligase SDIR1                                                                                                                         |
| TCONS_00009767 | 0.259627 | 0.632384   | 0.0116978  | BGIOSGA012319 | XP_006657864.2 zinc-metallopeptidase, peroxisomal-like isoform X1                                                                                                                                                     |
| TCONS_00025376 | 0.259639 | -0.0928048 | 0.454753   | BGIOSGA024056 |                                                                                                                                                                                                                       |
| TCONS_00035626 | 0.259988 | -0.262547  | 0.928119   | BGIOSGA029659 | XP_015698225.1 F-box protein At3g07870-like<br>XP_015696687.1 polycomb group protein EMBRYONIC FLOWER 2                                                                                                               |
| TCONS_00029789 | 0.260162 | -0.185835  | 0.618253   | BGIOSGA015869 | XP_006652860.1 ABC transporter I family member 1                                                                                                                                                                      |
| TCONS_00016658 | 0.260239 | 1.47253    | 1.26221    | BGIOSGA014303 |                                                                                                                                                                                                                       |
| TCONS_00032519 | 0.260455 | 0.321443   | 0.903943   | BGIOSGA031596 | NP_001140760.1putative DEAD-box ATP-dependent RNA helicase family protein<br>XP_015695273.1 WPP domain-associated protein isoform X2                                                                                  |
| TCONS_00024568 | 0.260785 | 1.06734    | 0.30978    | BGIOSGA009701 | XP_006652503.1PREDICTED: uncharacterized protein LOC102702840                                                                                                                                                         |
| TCONS_00016236 | 0.260827 | 0.999978   | 0.744004   | BGIOSGA029294 |                                                                                                                                                                                                                       |
| TCONS_00017319 | 0.260898 | 0.61684    | 0.619153   | BGIOSGA007850 | XP_006643887.1 60S ribosomal protein L11<br>XP_006646022.1 ATP-dependent zinc metalloprotease FTSH 4, mitochondrial isoform X1                                                                                        |
| TCONS_00001185 | 0.261082 | 1.10694    | 1.19475    | BGIOSGA000507 |                                                                                                                                                                                                                       |
| TCONS_00021505 | 0.261262 | -0.0495931 | -0.844689  | BGIOSGA022048 | XP_010228086.1uncharacterized protein LOC100841492 isoform X2<br>XP_006644044.2 NEDD8-activating enzyme E1 catalytic subunit                                                                                          |
| TCONS_00000652 | 0.26131  | 0.29071    | 0.465828   | BGIOSGA011691 |                                                                                                                                                                                                                       |
| TCONS_00012770 | 0.261631 | 0.2989     | 0.869001   | BGIOSGA016280 | XP_004982374.1protein OSB2, chloroplastic<br>XP_006657485.1 zinc finger A20 and AN1 domain-containing stress-associated protein 9                                                                                     |
| TCONS_00024636 | 0.261757 | -0.148464  | -0.401656  | BGIOSGA009664 | XP_006646516.1 embryogenesis-associated protein EMB8-like<br>XP_006659185.1 glucose-6-phosphate/phosphate translocator 2, chloroplastic-like                                                                          |
| TCONS_00002250 | 0.26176  | -0.706094  | 0.409022   | BGIOSGA026713 |                                                                                                                                                                                                                       |
| TCONS_00026035 | 0.261803 | -0.122915  | -0.910159  | BGIOSGA024203 |                                                                                                                                                                                                                       |
| TCONS_00020856 | 0.261997 | 1.24975    | 1.1359     | BGIOSGA033516 | XP_015693607.1 50S ribosomal protein L1                                                                                                                                                                               |
| TCONS_00015212 | 0.262213 | 0.110774   | 0.697246   | BGIOSGA020180 | XP_006653065.1 tubby-like F-box protein 7                                                                                                                                                                             |
| TCONS_00015940 | 0.262237 | 0.954814   | 1.4777     | BGIOSGA015043 | XP_006653431.2 protein TIC 40, chloroplastic<br>XP_015693533.1 NF-X1-type zinc finger protein NFXL1                                                                                                                   |
| TCONS_00021989 | 0.262438 | 1.04734    | 0.59527    | BGIOSGA021526 |                                                                                                                                                                                                                       |

## transcriptome

|                |          |            |            |              |                                                                                                                                  |
|----------------|----------|------------|------------|--------------|----------------------------------------------------------------------------------------------------------------------------------|
| TCONS_00003661 | 0.262489 | 0.693478   | 0.190122   | BGOSGA012114 | XP_006644222.1 26S proteasome non-ATPase regulatory subunit 13 homolog B-like<br>XP_006650062.1 auxin-repressed 12.5 kDa protein |
| TCONS_00012246 | 0.262496 | 0.878897   | 1.02203    | BGOSGA032547 | XP_006665025.1 protein mago nashi homolog                                                                                        |
| TCONS_00035877 | 0.262565 | 0.908222   | 0.338962   | BGOSGA027851 | XP_003573947.1 serine/threonine-protein kinase EDR1                                                                              |
| TCONS_00032259 | 0.262646 | 0.747278   | 0.762066   | BGOSGA028966 | XP_006655581.2 ninja-family protein Os05g0558800                                                                                 |
| TCONS_00018290 | 0.262703 | 0.221402   | 0.0252554  | BGOSGA020343 | XP_015698128.1 PREDICTED: uncharacterized protein LOC102717848                                                                   |
| TCONS_00009261 | 0.262771 | -0.155302  | 0.619264   | BGOSGA021684 | XP_006652808.1 polygalacturonase QRT3-like                                                                                       |
| TCONS_00014922 | 0.262802 | -2.33622   | -1.93648   | BGOSGA007400 | XP_006649459.1 serine/threonine-protein phosphatase PP2A-4 catalytic subunit-like                                                |
| TCONS_00011629 | 0.262805 | 0.673734   | 0.719053   | BGOSGA006870 | XP_006647884.1 probable galacturonosyltransferase 9                                                                              |
| TCONS_00006867 | 0.262829 | 0.471099   | 0.785921   | BGOSGA006429 | XP_006644350.1 amino-acid permease BAT1 homolog isoform X1                                                                       |
| TCONS_00001324 | 0.263248 | -1.97275   | -3.87039   | BGOSGA015195 | XP_015691953.1 DNA-(apurinic or apyrimidinic site) lyase, chloroplastic-like isoform X1                                          |
| TCONS_00001991 | 0.263294 | -2.33684   | -1.45227   | BGOSGA004627 | XP_020403152.1 DNAJ heat shock N-terminal domain-containing protein isoform X2                                                   |
| TCONS_00022783 | 0.263337 | -1.11635   | -0.171799  | BGOSGA033706 | NP_001148055.1 carotenoid isomerase 2                                                                                            |
| TCONS_00033704 | 0.263374 | -0.589128  | 0.0668411  | BGOSGA035475 | XP_006646194.1 trihelix transcription factor ASIL2-like                                                                          |
| TCONS_00004161 | 0.26346  | 0.532135   | 0.882219   | BGOSGA014371 | XP_015689259.1 synaptotagmin-2                                                                                                   |
| TCONS_00009087 | 0.263897 | -0.139102  | -0.0792108 | BGOSGA005316 | NP_001143396.1 uncharacterized protein LOC100276037                                                                              |
| TCONS_00012355 | 0.263914 | -0.32858   | 0.996689   | BGOSGA037352 | XP_015694979.1 probable glucuronosyltransferase Os07g0694400 isoform X1                                                          |
| TCONS_00025761 | 0.263941 | -4.57654   | -1.36595   | BGOSGA012379 | XP_006654303.1 S-adenosylmethionine carrier 1, chloroplastic/mitochondrial-like                                                  |
| TCONS_00019147 | 0.263979 | 0.192613   | 1.18164    | BGOSGA024448 | XP_015694553.1 squalene synthase-like                                                                                            |
| TCONS_00024727 | 0.264077 | -0.184397  | 1.00627    | BGOSGA025344 | XP_014758891.1 O-fucosyltransferase 6                                                                                            |
| TCONS_00016419 | 0.264111 | -0.0330167 | -0.650196  | BGOSGA014593 | XP_022683950.1 mediator of RNA polymerase II transcription subunit 15a isoform X1                                                |
| TCONS_00035818 | 0.264136 | -0.488417  | 0.875904   | BGOSGA037218 | XP_006664333.1 long chain acyl-CoA synthetase 6, peroxisomal-like                                                                |
| TCONS_00036670 | 0.264239 | -0.462581  | 0.464212   | BGOSGA032657 | XP_004976560.1 putative FBD-associated F-box protein At1g61330                                                                   |
| TCONS_00018198 | 0.264583 | -0.490459  | 0.907128   | BGOSGA033891 | XP_006649259.1 probable RNA-binding protein EIF1AD                                                                               |
| TCONS_00011443 | 0.264605 | 0.145146   | 0.0714771  | BGOSGA011581 | XP_006661689.1 zinc finger RNA-binding protein-like                                                                              |
| TCONS_00030888 | 0.264615 | 0.00756943 | 0.170794   | BGOSGA032691 | XP_015694854.1 plastid division protein PDV2                                                                                     |
| TCONS_00024494 | 0.264992 | -0.0572418 | 0.414306   | BGOSGA024902 | XP_006664281.1 probable WRKY transcription factor 54                                                                             |
| TCONS_00036561 | 0.265084 | -0.167958  | -1.62312   | BGOSGA000583 | XP_006657994.1 malate dehydrogenase, chloroplastic-like                                                                          |
| TCONS_00007689 | 0.265126 | -1.08814   | -2.50156   | BGOSGA026857 | XP_006650940.1 PREDICTED: uncharacterized protein LOC102702457                                                                   |
| TCONS_00011392 | 0.265203 | -0.373019  | 0.746393   | BGOSGA011632 | XP_006657923.1 PLASMODESMATA CALLOSE-BINDING PROTEIN 3-like                                                                      |
| TCONS_00024045 | 0.265619 | -3.6135    | -0.724101  | BGOSGA029269 | XP_024033861.1 bifunctional dethiobiotin synthetase/7,8-diamino-pelargonic acid aminotransferase, mitochondrial isoform X2       |
| TCONS_00027638 | 0.266163 | 0.466014   | 0.905867   | BGOSGA027374 | XP_006650244.1 probable serine incorporator                                                                                      |
| TCONS_00012535 | 0.266471 | -0.565202  | 0.222838   | BGOSGA005453 | XP_006655950.2 rac-like GTP-binding protein 4 isoform X2                                                                         |
| TCONS_00020413 | 0.26649  | -1.92197   | -0.644604  | BGOSGA002078 | XP_015689330.1 GPI mannosyltransferase 3                                                                                         |
| TCONS_00001201 | 0.266509 | -1.18746   | 0.751062   | BGOSGA007369 | XP_015689829.1 thioredoxin H4-1                                                                                                  |
| TCONS_00002909 | 0.266569 | -0.370713  | -0.247535  | BGOSGA018734 | XP_006653044.1 K(+) efflux antiporter 2, chloroplastic                                                                           |
| TCONS_00016895 | 0.266919 | 0.151733   | 0.120757   | BGOSGA014066 | XP_003572720.1 uncharacterized protein LOC100840025                                                                              |
| TCONS_00006467 | 0.266924 | -1.16207   | -0.675112  | BGOSGA008638 | XP_006657406.1 casein kinase II subunit alpha                                                                                    |
| TCONS_00024468 | 0.26694  | -0.23845   | 0.143493   | BGOSGA006589 | XP_004983824.1 probable membrane-associated kinase regulator 6                                                                   |
| TCONS_00032614 | 0.266991 | -2.4923    | 0.0001347  | BGOSGA000169 | XP_015698073.1 disease resistance protein RPM1-like                                                                              |
| TCONS_00033270 | 0.267101 | -0.734257  | -0.548051  | BGOSGA035578 | XP_004953560.1 AF4/FMR2 family member 4                                                                                          |
| TCONS_00006692 | 0.267427 | -0.0824737 | 0.638978   | BGOSGA008861 | XP_015697244.1 PREDICTED: uncharacterized protein LOC102704451                                                                   |
| TCONS_00032129 | 0.267516 | #NA        | -2.88122   | BGOSGA011992 | XP_006663207.1 DDT domain-containing protein PTM-like                                                                            |
| TCONS_00034304 | 0.267701 | 0.94141    | 0.253928   | BGOSGA034497 | XP_002489060.1 IRK-interacting protein                                                                                           |
| TCONS_00009686 | 0.267777 | -1.09317   | -1.48934   | BGOSGA029548 | XP_006657623.1 UPF0235 protein At5g63440 isoform X1                                                                              |
| TCONS_00024941 | 0.267991 | -0.203673  | 0.13639    | BGOSGA024447 | XP_006644213.1 beta-glucosidase 1                                                                                                |
| TCONS_00001011 | 0.268096 | -2.80536   | -0.970952  | BGOSGA014892 | XP_021308077.1 ABC transporter G family member 11                                                                                |
| TCONS_00029202 | 0.268164 | 0.418145   | 1.37083    | BGOSGA018917 | XP_004967383.2 glycosyltransferase-like                                                                                          |
| TCONS_00003153 | 0.268472 | 0.482201   | 1.04407    | BGOSGA015927 | KOBITO 1                                                                                                                         |
| TCONS_00025333 | 0.26851  | -1.08809   | -0.234962  | BGOSGA024095 | XP_006657830.1 protein THYLAKOID FORMATION1, chloroplastic isoform X1                                                            |
| TCONS_00009595 | 0.268787 | 0.533734   | -0.0681711 | BGOSGA012144 | XP_015690704.1 PREDICTED: uncharacterized protein LOC107303921                                                                   |
| TCONS_00018446 | 0.268926 | 0.297749   | 0.593298   | BGOSGA002614 | XP_006653929.2 PREDICTED: uncharacterized protein LOC102706005 isoform X1                                                        |
| TCONS_00001825 | 0.26912  | 0.966909   | 0.37803    | BGOSGA017841 | XP_006644708.1 probable sugar phosphate/phosphate translocator At1g06470                                                         |
| TCONS_00025893 | 0.269297 | 0.283512   | 1.54053    | BGOSGA027965 | XP_004972891.1 uncharacterized protein LOC101769116                                                                              |
| TCONS_00014024 | 0.269328 | -0.412049  | -0.281173  | BGOSGA015296 | XP_015691404.1 protein Rf1, mitochondrial-like                                                                                   |

transcriptome

|                |          |            |            |               |                                                                                             |
|----------------|----------|------------|------------|---------------|---------------------------------------------------------------------------------------------|
| TCONS_00027964 | 0.269353 | 0.549112   | -1.77128   | BGIOSGA015508 | XP_004979105.11-aminocyclopropane-1-carboxylate oxidase homolog 1                           |
| TCONS_00007288 | 0.269452 | -0.568291  | 0.0347134  | BGIOSGA007194 | XP_021314502.1probable pyridoxal 5'-phosphate synthase subunit PDX2                         |
| TCONS_00023612 | 0.269624 | -0.0180588 | 0.341829   | BGIOSGA008835 | XP_015694846.1PREDICTED: uncharacterized protein LOC102707884 isoform X1                    |
| TCONS_00031342 | 0.269699 | 0.591746   | 0.227861   | BGIOSGA011692 | NP_001150075.2lysm domain containing protein                                                |
| TCONS_00023174 | 0.26976  | 0.352266   | -0.856193  | #N/A          | #N/A                                                                                        |
| TCONS_00008340 | 0.269873 | 1.25895    | 0.549356   | BGIOSGA006085 | XP_006647479.2 tRNA (guanine(37)-N1)-methyltransferase                                      |
| TCONS_00010969 | 0.270063 | 0.0500638  | 1.10476    | BGIOSGA010720 | XP_006650092.1 50S ribosomal protein L6, chloroplastic                                      |
| TCONS_00035500 | 0.270204 | 0.311399   | -0.646699  | BGIOSGA001155 | XP_006663173.1 mini zinc finger protein 1-like                                              |
| TCONS_00011052 | 0.270226 | -5.14064   | -0.78911   | BGIOSGA008209 | XP_006650672.1PREDICTED: uncharacterized protein LOC102719188 isoform X2                    |
| TCONS_00034821 | 0.270406 | -3.95629   | -0.925565  | BGIOSGA013434 | XP_012703639.1rapid alkalization factor 23                                                  |
| TCONS_00017128 | 0.270406 | 0.213638   | 0.659397   | BGIOSGA019175 | XP_006654044.1PREDICTED: uncharacterized protein LOC102716498                               |
| TCONS_00002844 | 0.270419 | 0.36005    | 0.554837   | BGIOSGA001568 | XP_003564576.1histone H2B.5                                                                 |
| TCONS_00018189 | 0.270699 | 0.0392942  | 0.281051   | BGIOSGA000900 | XP_006655519.1 probable starch synthase 4, chloroplastic/amyloplastic                       |
| TCONS_00020463 | 0.270711 | 0.0265711  | 0.71078    | BGIOSGA029238 | XP_004965167.1uncharacterized protein LOC101778788                                          |
| TCONS_00000920 | 0.270869 | -1.20084   | -1.90326   | BGIOSGA010658 | XP_004968732.3CASP-like protein 1E1                                                         |
| TCONS_00037774 | 0.271236 | 0.711803   | 0.541537   | BGIOSGA017423 | XP_006653088.1 dolichyl-diphosphooligosaccharide--protein glycosyltransferase subunit 1B    |
| TCONS_00022944 | 0.271338 | 1.11021    | -0.349626  | BGIOSGA001315 | XP_015694452.1 probable galacturonosyltransferase 3 isoform X2                              |
| TCONS_00011834 | 0.271385 | -0.250042  | -0.0886513 | BGIOSGA011177 | XP_006656251.2 maf-like protein DDB_G0281937                                                |
| TCONS_00024424 | 0.271456 | 1.01851    | 0.594519   | BGIOSGA026295 | XP_006657384.1 BTB/POZ and MATH domain-containing protein 3-like                            |
| TCONS_00022027 | 0.271534 | 0.900005   | 0.258941   | BGIOSGA010942 | XP_006655987.1 asparagine synthetase [glutamine-hydrolyzing] 2                              |
| TCONS_00004093 | 0.271763 | 0.0991315  | 0.298004   | BGIOSGA001095 | XP_003569478.1zinc finger CCCH domain-containing protein 13                                 |
| TCONS_00032532 | 0.271787 | -0.214578  | -0.173536  | BGIOSGA014653 | XP_006661932.1 vesicle-associated protein 1-2                                               |
| TCONS_00013361 | 0.271914 | 0.328534   | 0.727488   | BGIOSGA024675 | XP_006650746.1 DDT domain-containing protein DDR4-like                                      |
| TCONS_00002193 | 0.272089 | 0.70435    | -0.231639  | BGIOSGA017952 | XP_006646490.2 pleckstrin homology domain-containing protein 1-like                         |
| TCONS_00008672 | 0.272231 | 0.410654   | 0.334477   | BGIOSGA035563 | XP_006647781.1 TBC1 domain family member 15                                                 |
| TCONS_00005300 | 0.272234 | 0.565449   | 0.735036   | BGIOSGA022237 | XP_006646801.1 peptidyl-prolyl cis-trans isomerase                                          |
| TCONS_00011492 | 0.272288 | -0.0800014 | -1.16688   | BGIOSGA011534 | XP_006649321.1PREDICTED: uncharacterized protein LOC102703193                               |
| TCONS_00038004 | 0.272665 | -0.667821  | 0.260363   | BGIOSGA015018 | XP_004975719.1COX assembly mitochondrial protein 2 homolog                                  |
| TCONS_00028511 | 0.27297  | 1.14135    | 0.472695   | BGIOSGA007638 | XP_006660412.1 CAX-interacting protein 4                                                    |
| TCONS_00009155 | 0.272984 | 0.345151   | 1.38969    | BGIOSGA011682 | XP_006649246.1 DEAD-box ATP-dependent RNA helicase 50                                       |
| TCONS_00000233 | 0.272995 | 0.618703   | 0.513672   | BGIOSGA001370 | XP_006645272.2 aspartate--tRNA ligase, chloroplastic/mitochondrial                          |
| TCONS_00012520 | 0.273136 | 0.197809   | -1.37623   | BGIOSGA010462 | XP_015690524.1PREDICTED: uncharacterized protein ycf36 isoform X2                           |
| TCONS_00003551 | 0.273282 | -0.663675  | -1.77425   | BGIOSGA001659 | XP_006644169.2 acyltransferase-like protein At1g54570, chloroplastic                        |
| TCONS_00007143 | 0.273289 | -0.275756  | 0.239433   | BGIOSGA005324 | XP_014755776.1putative F-box/LRR-repeat protein At5g02700                                   |
| TCONS_00017170 | 0.273445 | -0.791431  | 0.540581   | BGIOSGA001731 | XP_006654070.2 serine/threonine-protein phosphatase 4 regulatory subunit 3B-like isoform X2 |
| TCONS_00002233 | 0.273522 | 0.263286   | 0.741329   | BGIOSGA004869 | XP_006646505.1PREDICTED: uncharacterized protein LOC102699925 isoform X2                    |
| TCONS_00001738 | 0.273589 | -1.02375   | -0.535395  | BGIOSGA029007 | XP_006646275.2 ribose-phosphate pyrophosphokinase 3, chloroplastic                          |
| TCONS_00001870 | 0.273769 | -0.319619  | 0.388024   | BGIOSGA004502 | XP_002456390.1RHOMBROID-like protein 12, mitochondrial isoform X2                           |
| TCONS_00004810 | 0.273866 | -0.0196336 | 0.716961   | BGIOSGA020071 | XP_006645093.1 deoxyguanosine kinase, mitochondrial-like                                    |
| TCONS_00033971 | 0.27389  | 0.450746   | -0.612278  | BGIOSGA008933 | XP_006663650.2 ADP,ATP carrier protein ER-ANT1 isoform X1                                   |
| TCONS_00024760 | 0.274253 | 0.322987   | 0.160128   | BGIOSGA024617 | XP_004955805.1UPF0613 protein PB24D3.06c                                                    |
| TCONS_00021907 | 0.274308 | 0.843943   | 1.31298    | BGIOSGA009046 | XP_008648260.1DCD (Development and Cell Death) domain protein isoform X1                    |
| TCONS_00014890 | 0.274467 | 0.338729   | 0.959542   | BGIOSGA017069 | XP_015692218.1PREDICTED: uncharacterized protein LOC102708616                               |
| TCONS_00019628 | 0.274705 | -4.44019   | -2.04066   | BGIOSGA030479 | XP_006655485.2PREDICTED: uncharacterized protein LOC102699408                               |
| TCONS_00000677 | 0.274773 | -0.165395  | -0.426763  | BGIOSGA036617 | XP_015688196.1 transcription factor HBP-1b(c38) isoform X1                                  |
| TCONS_00028528 | 0.274807 | 0.941743   | 0.634943   | BGIOSGA030281 | XP_006660419.1 DNA-directed RNA polymerases II, IV and V subunit 3-like                     |
| TCONS_00023927 | 0.274837 | 0.632295   | 0.979106   | BGIOSGA002986 | XP_004951320.1sodium/calcium exchanger NCL2                                                 |
| TCONS_00030229 | 0.275002 | -1.15314   | -0.71077   | BGIOSGA037872 | XP_004957141.2photosystem I reaction center subunit V, chloroplastic                        |
| TCONS_00006405 | 0.275047 | 0.167211   | 1.08587    | BGIOSGA008567 | XP_015688941.1 pentatricopeptide repeat-containing protein At3g04130, mitochondrial         |
| TCONS_00003900 | 0.275204 | -0.369054  | 0.774283   | BGIOSGA032833 | XP_006646054.1 pentatricopeptide repeat-containing protein At4g02750-like                   |
| TCONS_00025850 | 0.275594 | 0.636034   | 1.62538    | BGIOSGA027917 | XP_006659084.1 pre-mRNA-splicing factor SLU7                                                |

## transcriptome

|                |          |            |            |               |                                                                                                       |
|----------------|----------|------------|------------|---------------|-------------------------------------------------------------------------------------------------------|
| TCONS_00020258 | 0.275602 | -2.08746   | -0.423877  | BGIOSGA026268 | XP_002440417.1 uncharacterized protein LOC8068642                                                     |
| TCONS_00022341 | 0.275614 | -0.161478  | -0.308431  | BGIOSGA022885 | XP_006657011.1 CMP-sialic acid transporter 1 XP_006657510.2 ATP-dependent DNA helicase 2 subunit KU70 |
| TCONS_00023241 | 0.275663 | 1.31845    | 0.514569   | BGIOSGA025282 | XP_002455310.1U-box domain-containing protein 4                                                       |
| TCONS_00002693 | 0.275869 | 0.283601   | 1.10632    | BGIOSGA002527 | XP_006647835.1 eukaryotic translation initiation factor 5B                                            |
| TCONS_00006797 | 0.27601  | 0.591791   | 0.702706   | BGIOSGA008970 | NP_001130864.1 harpin-induced protein                                                                 |
| TCONS_00009721 | 0.276032 | -0.402802  | 0.345191   | BGIOSGA028721 | XP_002441416.1anthocyanidin 5,3-O-glucosyltransferase                                                 |
| TCONS_00019661 | 0.276218 | -1.24024   | 0.311564   | BGIOSGA022722 | XP_006646639.1 aspartokinase 1, chloroplastic                                                         |
| TCONS_00005011 | 0.276605 | -0.0887222 | 0.42164    | BGIOSGA012398 | XP_015697283.1 PREDICTED: uncharacterized protein LOC107305138                                        |
| TCONS_00030990 | 0.276684 | 0.68948    | 0.183091   | BGIOSGA032796 | XP_004969979.1 uncharacterized protein LOC101783941                                                   |
| TCONS_00022216 | 0.276715 | 0.209062   | 0.770176   | BGIOSGA018369 | XP_015692217.1 BTB/POZ and TAZ domain-containing protein 1                                            |
| TCONS_00002380 | 0.277088 | 1.39628    | 1.0635     | BGIOSGA036982 | XP_022684879.1 uncharacterized protein LOC101775226 isoform X2                                        |
| TCONS_00034349 | 0.277354 | 0.689947   | 0.308759   | BGIOSGA034455 | XP_021313698.1 protein RETICULATA-RELATED 3, chloroplastic-like                                       |
| TCONS_00004603 | 0.277432 | -0.0179701 | -0.541312  | BGIOSGA000614 | XP_006662165.1 caffeoylshikimate esterase-like                                                        |
| TCONS_00030676 | 0.277541 | -0.0406562 | 0.117887   | BGIOSGA032498 | XP_006647038.1 26S protease regulatory subunit S10B homolog B                                         |
| TCONS_00007550 | 0.277555 | 0.502385   | 0.06522    | BGIOSGA023242 | XP_006655330.1 MLO-like protein 1                                                                     |
| TCONS_00019303 | 0.277592 | 1.65144    | 0.520082   | BGIOSGA020902 | XP_015698600.1 beta-amylase 3, chloroplastic-like                                                     |
| TCONS_00003169 | 0.277612 | -1.0067    | -0.434052  | BGIOSGA002052 | XP_006652910.1 haloalkane dehalogenase 2                                                              |
| TCONS_00016726 | 0.277738 | -1.48107   | -2.32953   | BGIOSGA014235 | XP_006663459.1 ABC transporter I family member 11, chloroplastic                                      |
| TCONS_00033491 | 0.277951 | -1.1422    | -0.26368   | BGIOSGA035287 | XP_015696797.1 inositol-tetrakisphosphate 1-kinase 6                                                  |
| TCONS_00030369 | 0.278005 | -0.463911  | 0.252065   | BGIOSGA022575 | XP_006656436.1 probable inactive purple acid phosphatase 28                                           |
| TCONS_00022850 | 0.278064 | 0.1127     | 0.586679   | BGIOSGA020595 | XP_006655879.1 nucleolar GTP-binding protein 1-like                                                   |
| TCONS_00021786 | 0.278181 | 1.30903    | 0.991545   | BGIOSGA010143 | XP_006661225.2 PREDICTED: uncharacterized protein At1g04910-like                                      |
| TCONS_00030034 | 0.278236 | -0.176742  | 0.0247903  | BGIOSGA024830 | XP_006644345.1 AAA-ATPase At3g50940-like                                                              |
| TCONS_00001311 | 0.278402 | -0.236147  | -0.388899  | BGIOSGA031550 | XP_006661956.1 glycine cleavage system H protein, mitochondrial                                       |
| TCONS_00031460 | 0.278412 | -0.0597569 | -1.31174   | BGIOSGA033278 | XP_006657722.2 NAD-dependent malic enzyme 62 kDa isoform, mitochondrial                               |
| TCONS_00023706 | 0.278487 | 0.215699   | -0.0224999 | BGIOSGA004441 | XP_006664045.1 DNAJ protein JJJ1 homolog                                                              |
| TCONS_00036079 | 0.278622 | 0.720994   | 0.957127   | BGIOSGA018886 | XP_006662961.1 acyl carrier protein 1, chloroplastic-like                                             |
| TCONS_00034945 | 0.278644 | 0.719583   | -0.423731  | BGIOSGA020687 | XP_006649979.1 adenylsuccinate lyase-like                                                             |
| TCONS_00009942 | 0.278728 | 0.371647   | 0.757387   | BGIOSGA012492 | XP_006643650.1 1-deoxy-D-xylulose 5-phosphate reductoisomerase, chloroplastic                         |
| TCONS_00002673 | 0.278957 | -0.605105  | -1.24787   | BGIOSGA002548 | XP_006646532.2 ribosomal lysine N-methyltransferase 3                                                 |
| TCONS_00004826 | 0.279044 | 0.844978   | 2.06864    | BGIOSGA000391 | XP_015688445.1 protein transport protein SEC23                                                        |
| TCONS_00003442 | 0.279139 | 0.381769   | 0.220457   | BGIOSGA012049 | XP_003569185.1 probable protein phosphatase 2C 5 isoform X5                                           |
| TCONS_00001124 | 0.279394 | -1.08926   | -1.19324   | BGIOSGA023484 | XP_015693936.1 carotenoid 9,10(9',10')-cleavage dioxygenase 1-like                                    |
| TCONS_00021670 | 0.279499 | -1.01241   | -0.359143  | BGIOSGA027069 | XP_006650514.1 cyclase-associated protein 1                                                           |
| TCONS_00013086 | 0.279768 | 0.33323    | 0.110264   | BGIOSGA028762 | XP_006647211.1 26S protease regulatory subunit 6B homolog                                             |
| TCONS_00005954 | 0.279884 | 0.583248   | 0.0972915  | BGIOSGA003944 | XP_003570219.1 pentatricopeptide repeat-containing protein At1g77360, mitochondrial                   |
| TCONS_00008677 | 0.27994  | 0.295046   | 0.420179   | BGIOSGA005753 | XP_006647390.1 ankyrin repeat protein SKIP35-like                                                     |
| TCONS_00008194 | 0.28008  | 0.689043   | 0.896595   | BGIOSGA006244 | XP_004981649.1 CCG-binding protein 1                                                                  |
| TCONS_00013225 | 0.280454 | 0.949935   | 3.17847    | BGIOSGA026844 | XP_020405361.1 ribonuclease 2 isoform X2                                                              |
| TCONS_00004894 | 0.280587 | -1.30091   | -0.711034  | BGIOSGA004786 | XP_015699214.1 PREDICTED: uncharacterized protein LOC102713681                                        |
| TCONS_00003838 | 0.28062  | -1.1752    | -0.355037  | BGIOSGA001372 | XP_006660152.1 GDT1-like protein 5                                                                    |
| TCONS_00028053 | 0.280829 | -0.0791999 | -0.0173147 | BGIOSGA026936 | XP_006645001.1 probable methyltransferase PMT11                                                       |
| TCONS_00004719 | 0.280972 | 0.302218   | 0.397299   | BGIOSGA005599 | XP_002438500.1 GDGL esterase/lipase At5g45910                                                         |
| TCONS_00022360 | 0.280985 | -1.2083    | 1.40995    | BGIOSGA003415 | XP_020393135.1 armadillo/beta-catenin-like repeat family protein isoform X1                           |
| TCONS_00031836 | 0.280992 | 0.683348   | -0.0568554 | BGIOSGA034645 | XP_006649695.1 glucose-induced degradation protein 8 homolog                                          |
| TCONS_00009646 | 0.28104  | 0.130051   | -0.145998  | BGIOSGA012190 | XP_002439678.140S ribosomal protein S4                                                                |
| TCONS_00017667 | 0.281345 | 0.929846   | 0.848652   | BGIOSGA003505 | XP_015697084.1 palmitoyl-protein thioesterase 1-like                                                  |
| TCONS_00031633 | 0.281673 | 0.0820253  | 0.565781   | BGIOSGA011650 | XP_015696697.1 protein transport protein Sec61 subunit alpha-like isoform X1                          |
| TCONS_00029882 | 0.281802 | 1.0655     | 0.829623   | BGIOSGA012106 | NP_001149272.1 BSD domain containing protein                                                          |
| TCONS_00001880 | 0.28192  | 0.518575   | 1.13185    | BGIOSGA020165 | XP_008645668.1 UDP-glycosyltransferase 73C3                                                           |
| TCONS_00007582 | 0.281929 | 0.812147   | 0.726442   | BGIOSGA029561 | XP_006659247.1 ADP-ribosylation factor 3                                                              |
| TCONS_00026218 | 0.282272 | -0.334041  | 0.730724   | BGIOSGA022571 | XP_004978608.1U3 small nucleolar ribonucleoprotein protein MPP10                                      |
| TCONS_00034252 | 0.282274 | 1.63663    | 1.1692     | BGIOSGA016257 | XP_015692415.1 PREDICTED: uncharacterized protein LOC102708380                                        |
| TCONS_00000818 | 0.28234  | -0.635099  | -0.673622  | BGIOSGA003406 | XP_015693304.1 auxin-responsive protein IAA2-like                                                     |
| TCONS_00000351 | 0.282516 | -0.962303  | 0.457181   | BGIOSGA013770 | XP_006650402.1 DUF21 domain-containing protein At2g14520 isoform X1                                   |
| TCONS_00010679 | 0.282673 | -0.314624  | 1.12       | BGIOSGA011758 |                                                                                                       |

## transcriptome

|                |          |             |             |               |                                                                                                      |
|----------------|----------|-------------|-------------|---------------|------------------------------------------------------------------------------------------------------|
| TCONS_00006576 | 0.282734 | 1.28474     | 0.641313    | BGIOSGA032178 | XP_006648900.2 cationic amino acid transporter 9, chloroplastic                                      |
| TCONS_00002683 | 0.282737 | -0.358444   | -0.0554554  | BGIOSGA017394 | XP_006643660.1 proline-rich receptor-like protein kinase PERK8                                       |
| TCONS_00016721 | 0.282843 | 1.14982     | 1.25953     | BGIOSGA014241 | XP_006652900.1 glutamyl-tRNA(Gln) amidotransferase subunit A, chloroplastic/mitochondrial isoform X1 |
| TCONS_00020315 | 0.283021 | 0.50441     | 0.526571    | BGIOSGA030392 | XP_015693486.1 PREDICTED: uncharacterized protein LOC102709938                                       |
| TCONS_00013485 | 0.283214 | -0.324446   | 0.20361     | BGIOSGA009506 | NP_001278470.1 huntingtin interacting protein K                                                      |
| TCONS_00003753 | 0.283379 | 0.055785    | -0.542476   | BGIOSGA004758 | XP_004977214.1 putative pectate lyase 21                                                             |
| TCONS_00015431 | 0.283397 | 0.768484    | 0.364366    | BGIOSGA004785 | XP_015691709.1 pumilio homolog 3-like                                                                |
| TCONS_00024036 | 0.283601 | 0.758483    | 1.15917     | BGIOSGA026074 | XP_015694921.1 tRNA (guanosine(18)-2'-O)-methyltransferase                                           |
| TCONS_00000477 | 0.283604 | -0.796043   | -1.06583    | BGIOSGA007005 | XP_006645668.1 cytochrome P450 71A1-like                                                             |
| TCONS_00018747 | 0.283895 | -0.097076   | 0.732373    | BGIOSGA018674 | XP_006651564.1 pseudouridine kinase                                                                  |
| TCONS_00016916 | 0.283932 | 0.766152    | 0.590992    | BGIOSGA021314 | XP_015691625.1 SKP1-interacting partner 15                                                           |
| TCONS_00016405 | 0.284462 | -1.34151    | -0.700266   | BGIOSGA014561 | XP_006652631.1 PREDICTED: uncharacterized protein LOC102718823 isoform X1                            |
| TCONS_00023046 | 0.284691 | 0.608226    | 1.31493     | BGIOSGA024641 | XP_015695346.1 heterogeneous nuclear ribonucleoprotein A/B-like                                      |
| TCONS_00016145 | 0.284707 | 0.246932    | -0.186674   | BGIOSGA004989 | XP_015692351.1 sn1-specific diacylglycerol lipase beta isoform X1                                    |
| TCONS_00012347 | 0.28471  | 1.07248     | 1.04589     | BGIOSGA026194 | XP_015690385.1 RNA-binding protein CP29B, chloroplastic-like                                         |
| TCONS_00028404 | 0.284815 | -0.180487   | -0.224105   | BGIOSGA024011 | XP_006659647.1 serine/threonine-protein kinase Nek5-like                                             |
| TCONS_00017828 | 0.28503  | 0.509548    | 0.384532    | BGIOSGA024567 | XP_004962059.1 PHD finger protein ALFIN-LIKE 5                                                       |
| TCONS_00005964 | 0.285196 | 0.179891    | 0.264605    | BGIOSGA013268 | XP_006648590.2 ARF guanine-nucleotide exchange factor GNOM-like                                      |
| TCONS_00016851 | 0.28573  | 0.514347    | -0.0261325  | BGIOSGA014113 | XP_015692267.1 PREDICTED: uncharacterized protein LOC102714176 isoform X3                            |
| TCONS_00013604 | 0.285963 | 0.48585     | -1.49002    | BGIOSGA015757 | NP_001141064.1 membrane protein                                                                      |
| TCONS_00000121 | 0.28603  | 0.588505    | 1.6526      | BGIOSGA014333 | XP_015695730.1 uncharacterized lipoprotein syc1174_c-like                                            |
| TCONS_00011280 | 0.286136 | 0.446756    | 1.6486      | BGIOSGA028737 | XP_006651991.1 flap endonuclease 1-B isoform X1                                                      |
| TCONS_00032537 | 0.286326 | 0.297302    | 0.546625    | BGIOSGA031579 | XP_015697383.1 tubulin-folding cofactor D                                                            |
| TCONS_00032039 | 0.286346 | 1.30491     | 1.65146     | BGIOSGA017094 | XP_006661708.1 vacuolar-sorting receptor 3-like                                                      |
| TCONS_00004824 | 0.286484 | 0.658916    | 0.243212    | BGIOSGA000393 | XP_006646530.1 extradiol ring-cleavage dioxygenase-like                                              |
| TCONS_00028096 | 0.286499 | -0.551588   | -1.43773    | BGIOSGA005795 | XP_006659461.1 probable 4-coumarate--CoA ligase 5                                                    |
| TCONS_00000232 | 0.286683 | 1.76458     | 1.1296      | BGIOSGA028894 | XP_003564232.1 histone H2B.1                                                                         |
| TCONS_00022615 | 0.286985 | 0.0702557   | 1.44018     | BGIOSGA022181 | XP_006656565.1 pentatricopeptide repeat-containing protein At1g08070, chloroplastic-like             |
| TCONS_00011457 | 0.287029 | -0.0370256  | 0.171246    | BGIOSGA019392 | XP_006649286.1 PREDICTED: uncharacterized protein LOC102717045                                       |
| TCONS_00020777 | 0.287097 | -0.757483   | 0.00746134  | BGIOSGA022973 | XP_015693579.1 alpha-glucan water dikinase, chloroplastic                                            |
| TCONS_00001241 | 0.287191 | -0.613437   | 0.0101786   | BGIOSGA028054 | XP_002455862.1 uncharacterized protein LOC8082462                                                    |
| TCONS_00025545 | 0.287274 | 0.415298    | 0.525759    | BGIOSGA023887 | XP_006657976.1 multifunctional methyltransferase subunit TRM112-like protein At1g78190 isoform X3    |
| TCONS_00035894 | 0.287466 | -0.142202   | 0.463392    | BGIOSGA029070 | XP_002453153.2 probable nucleolar protein 5-2                                                        |
| TCONS_00036233 | 0.287475 | 0.379961    | 0.320648    | BGIOSGA025074 | XP_004962768.1 ocs element-binding factor 1                                                          |
| TCONS_00016144 | 0.287494 | 1.04099     | -0.191514   | BGIOSGA033495 | XP_010240054.1 serine/threonine-protein kinase OXI1                                                  |
| TCONS_00012434 | 0.287677 | -0.584082   | 0.367341    | BGIOSGA029066 | XP_006650184.1 PREDICTED: uncharacterized protein LOC102718528                                       |
| TCONS_00005149 | 0.287699 | -1.07962    | -0.906691   | BGIOSGA027714 | XP_020395800.1 actin-97 isoform X1                                                                   |
| TCONS_00029506 | 0.287912 | 0.397667    | 0.0411989   | BGIOSGA037089 | XP_015696452.1 26S protease regulatory subunit 6B homolog                                            |
| TCONS_00013830 | 0.287935 | 0.0878083   | 0.288861    | BGIOSGA016010 | XP_006652130.1 UPF0307 protein plu4061                                                               |
| TCONS_00007495 | 0.288027 | 0.196223    | -0.0557795  | BGIOSGA036567 | XP_004951625.130S ribosomal protein S21, chloroplastic                                               |
| TCONS_00029613 | 0.288082 | 0.454404    | -0.84901    | BGIOSGA030306 | XP_015696597.1 ankryrin-1-like                                                                       |
| TCONS_00033621 | 0.288165 | -0.410007   | -0.495482   | BGIOSGA040498 | XP_006663501.1 UPF0481 protein At3g47200-like                                                        |
| TCONS_00037515 | 0.288426 | -0.0581737  | 0.650304    | BGIOSGA018976 | XP_021302550.1 uncharacterized protein LOC8082998                                                    |
| TCONS_00026803 | 0.28901  | 0.314475    | 0.622384    | BGIOSGA006207 | XP_006659510.1 probable bifunctional riboflavin biosynthesis protein RIBA 1, chloroplastic           |
| TCONS_00015921 | 0.289291 | 0.233974    | -0.235307   | BGIOSGA006268 | XP_006652305.1 probable L-ascorbate peroxidase 7, chloroplastic                                      |
| TCONS_00031260 | 0.289501 | -0.00182825 | -0.254308   | BGIOSGA033078 | XP_006661831.1 protein CHROMATIN REMODELING 20 isoform X1                                            |
| TCONS_00016290 | 0.289719 | -1.51813    | 0.00444951  | BGIOSGA009848 | XP_006652539.1 GEM-like protein 4                                                                    |
| TCONS_00011327 | 0.289758 | 0.20508     | 0.735774    | BGIOSGA013937 | XP_006665037.1 myb-like protein X                                                                    |
| TCONS_00017741 | 0.289953 | -0.0112327  | 0.450301    | BGIOSGA008237 | XP_006654357.1 RNA polymerase II C-terminal domain phosphatase-like 4                                |
| TCONS_00024954 | 0.290059 | -0.134536   | -0.00486533 | BGIOSGA008556 | XP_006658492.1 glucose-6-phosphate 1-dehydrogenase, chloroplastic-like                               |
| TCONS_00010121 | 0.290079 | -0.277254   | 0.762148    | BGIOSGA029256 | XP_006650106.2 serine/arginine-rich SC35-like splicing factor SCL28                                  |
| TCONS_00024875 | 0.290138 | -0.122553   | 0.042325    | BGIOSGA016046 | XP_006658455.1 BTB/POZ domain-containing protein At2g13690-like                                      |
| TCONS_00007231 | 0.290174 | -0.0117849  | -0.544131   | BGIOSGA008879 | XP_006648225.1 serine carboxypeptidase 3                                                             |
| TCONS_00008185 | 0.290737 | 0.392044    | -0.277075   | BGIOSGA005988 | XP_004952783.1 two-component response regulator ORR2                                                 |
| TCONS_00003940 | 0.290737 | 0.35505     | 0.825023    | BGIOSGA036679 | XP_015689214.1 probable calcium-binding protein CML12                                                |

## transcriptome

|                |          |            |              |               |                                                                                                     |
|----------------|----------|------------|--------------|---------------|-----------------------------------------------------------------------------------------------------|
| TCONS_00029298 | 0.290782 | 0.54783    | 0.89089      | BGIOSGA019462 | XP_006660590.1 leucine--tRNA ligase, cytoplasmic-like                                               |
| TCONS_00032892 | 0.290875 | -2.0545    | -2.32642     | BGIOSGA036922 | XP_006662695.1 PREDICTED: uncharacterized protein LOC102706327                                      |
| TCONS_00027260 | 0.290939 | 2.29005    | 1.0783       | BGIOSGA029883 | XP_006659071.1 succinate dehydrogenase [ubiquinone] iron-sulfur subunit 1, mitochondrial isoform X1 |
| TCONS_00034832 | 0.290945 | -0.257195  | 0.289441     | BGIOSGA037144 | NP_001143653.1 uncharacterized LOC100276375 precursor                                               |
| TCONS_00029630 | 0.291042 | 0.478281   | 1.34091      | BGIOSGA030191 | XP_004962128.1 upstream activation factor subunit UAF30                                             |
| TCONS_00019235 | 0.291149 | 0.141039   | 0.156626     | BGIOSGA018113 | XP_006654358.1 peroxisomal adenine nucleotide carrier 1-like                                        |
| TCONS_00019541 | 0.291265 | 0.600615   | 0.733314     | BGIOSGA034571 | XP_006654577.1 histone-lysine N-methyltransferase, H3 lysine-9 specific SUVH1-like                  |
| TCONS_00031751 | 0.291286 | 1.29137    | -0.180786    | BGIOSGA032367 | XP_006661612.1 uncharacterized ATP-dependent helicase C29A10.10c-like                               |
| TCONS_00015123 | 0.291471 | -0.531211  | -0.000918801 | BGIOSGA017302 | XP_006652968.1 protein IQ-DOMAIN 32                                                                 |
| TCONS_00022455 | 0.291521 | -0.451925  | 0.55358      | BGIOSGA021002 | XP_015693779.1 histone deacetylase 2 isoform X2                                                     |
| TCONS_00025580 | 0.291794 | -2.29836   | -0.177617    | BGIOSGA012321 | XP_015694826.1 phosphate metabolism protein 8-like                                                  |
| TCONS_00021361 | 0.291795 | -0.16786   | 0.747585     | BGIOSGA011521 | XP_006656480.1 pre-mRNA-splicing factor syf2                                                        |
| TCONS_00002548 | 0.291904 | 1.02343    | -0.894098    | BGIOSGA005192 | XP_006645378.1 PREDICTED: uncharacterized protein LOC102722445                                      |
| TCONS_00027938 | 0.291916 | -0.956634  | -0.727686    | BGIOSGA013757 | XP_006650751.1 PREDICTED: uncharacterized protein LOC102717971                                      |
| TCONS_00001047 | 0.292143 | 0.0712033  | -0.255168    | BGIOSGA010136 | XP_015693243.1 PREDICTED: uncharacterized protein LOC102715308                                      |
| TCONS_00006708 | 0.292145 | -0.469382  | -0.242474    | BGIOSGA013935 | XP_015689465.1 cyclin-dependent kinase F-4                                                          |
| TCONS_00009869 | 0.292188 | -0.015677  | 0.468942     | BGIOSGA006573 | XP_006649933.1 40S ribosomal protein S7                                                             |
| TCONS_00009318 | 0.292237 | -0.123833  | 1.0278       | BGIOSGA033224 | XP_006651039.1 protein SHOOT GRAVITROPISM 6                                                         |
| TCONS_00019939 | 0.292313 | -1.49206   | -0.509269    | BGIOSGA019872 | XP_006655670.1 glutathione gamma-glutamylcysteinyltransferase 1-like                                |
| TCONS_00021623 | 0.292448 | -1.30575   | -0.112422    | BGIOSGA029762 | XP_015694108.1 ATP-dependent 6-phosphofructokinase 3-like                                           |
| TCONS_00028324 | 0.292633 | 0.807643   | -0.424266    | BGIOSGA035073 | XP_004973917.1 uncharacterized protein LOC101763435                                                 |
| TCONS_00022315 | 0.292684 | 0.204418   | 0.288893     | BGIOSGA021164 | XP_006656117.2 BTB/POZ domain-containing protein POB1-like                                          |
| TCONS_00004107 | 0.29298  | -1.25958   | -0.59812     | BGIOSGA033480 | XP_003569488.1 plastidial pyruvate kinase 2                                                         |
| TCONS_00011723 | 0.29319  | -1.3302    | -1.02463     | BGIOSGA011286 | XP_015690909.1 sulfate transporter 2.1-like isoform X3                                              |
| TCONS_00024214 | 0.293235 | -0.91941   | 0.693803     | BGIOSGA037767 | XP_021318591.1 uncharacterized protein LOC8075867 isoform X1                                        |
| TCONS_00015906 | 0.293344 | -0.621639  | -0.18404     | BGIOSGA003439 | XP_006652304.1 PREDICTED: uncharacterized protein LOC102714005                                      |
| TCONS_00019248 | 0.293505 | 0.415683   | 0.490958     | BGIOSGA018100 | XP_015692769.1 preprotein translocase subunit SCY2, chloroplastic isoform X2                        |
| TCONS_00002981 | 0.293619 | -0.0409813 | -0.59685     | BGIOSGA018678 | XP_006643850.1 glutamine--tRNA ligase-like                                                          |
| TCONS_00028790 | 0.294022 | 1.90642    | -0.162403    | BGIOSGA015622 | XP_015696543.1 probable WRKY transcription factor 41                                                |
| TCONS_00023784 | 0.294035 | -1.07545   | -0.814928    | BGIOSGA005821 | XP_024317889.1 uncharacterized protein LOC100831688                                                 |
| TCONS_00002978 | 0.294041 | 1.10353    | 1.44833      | BGIOSGA002241 | XP_006645578.1 DEAD-box ATP-dependent RNA helicase 39                                               |
| TCONS_00027837 | 0.294256 | 0.795921   | 0.260401     | BGIOSGA027167 | XP_015696230.1 PREDICTED: uncharacterized protein LOC102706871                                      |
| TCONS_00008068 | 0.294301 | 0.576232   | 0.310478     | BGIOSGA006385 | XP_006647258.1 lipopolysaccharide-induced tumor necrosis factor-alpha factor homolog                |
| TCONS_00006369 | 0.294326 | 1.45078    | 0.231122     | BGIOSGA023419 | XP_015690303.1 serine/threonine-protein kinase HT1-like                                             |
| TCONS_00011244 | 0.294502 | -0.873223  | -0.635709    | BGIOSGA013844 | XP_006650815.1 chaperone protein DnaJ-like                                                          |
| TCONS_00019447 | 0.294511 | 0.379319   | 0.0887379    | BGIOSGA004755 | XP_010231285.1 SAC3 family protein A isoform X3                                                     |
| TCONS_00025760 | 0.294522 | -2.3018    | -1.24853     | BGIOSGA004321 | XP_006658177.2 peroxidase 21-like                                                                   |
| TCONS_00019056 | 0.294553 | 0.176203   | 0.461887     | BGIOSGA001597 | XP_021321574.1 uncharacterized protein LOC110437414 isoform X1                                      |
| TCONS_00023262 | 0.294555 | 0.200507   | 0.785055     | BGIOSGA009431 | XP_015695344.1 PREDICTED: uncharacterized protein At4g14100-like                                    |
| TCONS_00019074 | 0.294627 | -0.876825  | 0.0349458    | BGIOSGA018265 | XP_006656002.1 guanine nucleotide-binding protein alpha-1 subunit isoform X1                        |
| TCONS_00009778 | 0.294878 | 0.370816   | 0.596707     | BGIOSGA035977 | XP_006649845.1 protein spotted leaf 11-like isoform X2                                              |
| TCONS_00028687 | 0.294901 | 0.666387   | 1.00178      | BGIOSGA006869 | XP_006660499.1 serine/threonine-protein phosphatase PP-X isozyme 2                                  |
| TCONS_00017049 | 0.294912 | 0.138277   | 0.750504     | BGIOSGA029449 | XP_003561933.1 uncharacterized protein LOC100834465                                                 |
| TCONS_00031583 | 0.295039 | -0.281146  | 0.631696     | BGIOSGA011602 | XP_002467557.1 arsenate reductase 2.1                                                               |
| TCONS_00027559 | 0.295176 | -3.98637   | 0.556712     | BGIOSGA032574 | XP_021306439.1 zinc finger BED domain-containing protein RICESLEEPER 2-like                         |
| TCONS_00012260 | 0.295251 | 0.778989   | 0.739322     | BGIOSGA003167 | XP_006650075.2 PREDICTED: uncharacterized protein LOC102709821 isoform X1                           |
| TCONS_00034265 | 0.295301 | 0.483557   | 0.548706     | BGIOSGA036663 | XP_006664974.1 probable calcium-binding protein CML49                                               |
| TCONS_00021355 | 0.295316 | 0.536898   | 0.612282     | BGIOSGA007410 | XP_006656475.1 peptidyl-prolyl cis-trans isomerase CYP20-1-like                                     |
| TCONS_00033196 | 0.295325 | 0.697185   | 0.0974052    | BGIOSGA034297 | XP_015697521.1 putative receptor-like protein kinase At4g00960 isoform X2                           |
| TCONS_00026405 | 0.29553  | 1.47184    | 0.957925     | BGIOSGA030083 | XP_015695567.1 mediator of RNA polymerase II transcription subunit 14-like                          |
| TCONS_00032133 | 0.295735 | 0.56174    | 0.574439     | BGIOSGA003756 | XP_015696978.1 F-box protein At5g49610-like                                                         |

transcriptome

|                |          |            |            |               |                                                                                                            |
|----------------|----------|------------|------------|---------------|------------------------------------------------------------------------------------------------------------|
| TCONS_00023445 | 0.295956 | -1.65153   | 2.13398    | BGIOSGA020686 | XP_015694877.1 metal transporter Nramp1 isoform X1<br>XP_006650154.1 serine/threonine-protein kinase SAPK1 |
| TCONS_00012381 | 0.295993 | -0.228905  | -0.773759  | BGIOSGA013621 | XP_004975311.1 uncharacterized protein LOC101765475                                                        |
| TCONS_00014017 | 0.296004 | -0.654204  | 0.275582   | BGIOSGA016162 | XP_015696746.1 histone-lysine N-methyltransferase ASHH3-like                                               |
| TCONS_00029791 | 0.296127 | 0.73195    | 0.797807   | BGIOSGA028752 | XP_002463061.1 pre-mRNA-splicing factor 18                                                                 |
| TCONS_00025385 | 0.296176 | 0.234873   | 1.16854    | BGIOSGA009977 | XP_004966377.1 protein O-linked-mannose beta-1,4-N-acetylglucosaminyltransferase 2                         |
| TCONS_00022879 | 0.296422 | -2.36843   | -1.02383   | BGIOSGA002505 | XP_004979375.1 putative FBD-associated F-box protein At1g61330 isoform X1                                  |
| TCONS_00016655 | 0.296481 | -1.45496   | -0.307948  | BGIOSGA026517 | XP_006661761.1 ATP-dependent 6-phosphofructokinase 5, chloroplast-like                                     |
| TCONS_00032181 | 0.296604 | 1.16642    | 0.388928   | BGIOSGA029762 | XP_006644872.1 protein AIG2-like                                                                           |
| TCONS_00005397 | 0.296658 | -0.391827  | -0.294721  | BGIOSGA020580 | XP_006644492.1 probable E3 ubiquitin-protein ligase HIP1 isoform X2                                        |
| TCONS_00004137 | 0.296689 | -0.0138672 | 0.794104   | BGIOSGA020365 | XP_006650494.1 threonine dehydratase biosynthetic, chloroplastic                                           |
| TCONS_00010818 | 0.296745 | -0.170348  | 2.11704    | BGIOSGA013443 | XP_015688981.1 CASP-like protein 4A2                                                                       |
| TCONS_00007311 | 0.297103 | 0.490568   | -0.124803  | BGIOSGA004995 | XP_006656084.1 mitogen-activated protein kinase kinase 3 isoform X1                                        |
| TCONS_00022243 | 0.297202 | 0.30695    | 0.605352   | BGIOSGA021253 | XP_015697813.1 pentatricopeptide repeat-containing protein At5g04780-like                                  |
| TCONS_00033466 | 0.29725  | 0.160432   | -0.694802  | BGIOSGA011210 | XP_006656200.1 3-hydroxyisobutyryl-CoA hydrolase-like protein 3, mitochondrial                             |
| TCONS_00020966 | 0.297362 | -0.505177  | -0.0419382 | BGIOSGA023191 | XP_014753211.1 caffeine/yishikimate esterase                                                               |
| TCONS_00025354 | 0.297576 | 1.05729    | 0.281995   | BGIOSGA003373 | XP_006664904.2 protein FAR1-RELATED SEQUENCE 6-like isoform X2                                             |
| TCONS_00006431 | 0.297897 | 0.434044   | 0.474364   | BGIOSGA008595 | XP_006664493.1 lysine-specific demethylase REF6-like                                                       |
| TCONS_00037000 | 0.298314 | -0.217755  | 0.331926   | BGIOSGA011871 | XP_006644440.1 GDSL esterase/lipase At1g28600-like isoform X2                                              |
| TCONS_00001474 | 0.298993 | -0.928082  | -1.18043   | BGIOSGA019840 | XP_015692170.1 acetylglutamate kinase-like                                                                 |
| TCONS_00014711 | 0.299251 | 1.36165    | 0.781632   | BGIOSGA008749 | XP_015697557.1 protein trichome birefringence-like 10                                                      |
| TCONS_00032960 | 0.299327 | -0.468481  | 0.204896   | BGIOSGA022517 | XP_006647620.1 probable enoyl-CoA hydratase 2, mitochondrial                                               |
| TCONS_00006568 | 0.299469 | 0.428525   | 0.789232   | BGIOSGA008734 | XP_006652169.1 NADH dehydrogenase [ubiquinone] 1 alpha subcomplex subunit 2                                |
| TCONS_00015604 | 0.299538 | -0.529563  | -0.671934  | BGIOSGA016116 | XP_015689513.1 THO complex subunit 5A isoform X1                                                           |
| TCONS_00006929 | 0.299665 | 0.595809   | 0.532125   | BGIOSGA009109 | XP_004964835.2 anthranilate N-benzoyltransferase protein 1                                                 |
| TCONS_00021620 | 0.29973  | 1.13588    | -0.130518  | BGIOSGA001950 | XP_003570655.1 sphinganine C4-monoxygenase 1                                                               |
| TCONS_00006869 | 0.299882 | -0.042813  | 0.377007   | BGIOSGA004143 | XP_021314992.1 glycerophosphodiester phosphodiesterase GDPDL7 isoform X2                                   |
| TCONS_00007486 | 0.300006 | -0.741871  | 0.222527   | BGIOSGA006998 | XP_015690781.1 alpha-glucosidase 2-like                                                                    |
| TCONS_00002428 | 0.300032 | -0.734229  | 0.103053   | BGIOSGA025961 | XP_012702012.2 crocetin glucosyltransferase, chloroplastic-like                                            |
| TCONS_00002957 | 0.300045 | -0.836079  | -2.32866   | BGIOSGA026166 | XP_006647923.1 lysine-specific histone demethylase 1 homolog 1                                             |
| TCONS_00008828 | 0.301263 | 0.266054   | 1.07006    | BGIOSGA005597 | XP_006655731.1 E3 ubiquitin ligase BIG BROTHER-like                                                        |
| TCONS_00020035 | 0.301273 | 0.664958   | 0.480481   | BGIOSGA015390 | XP_006656293.1 ER membrane protein complex subunit 7 homolog                                               |
| TCONS_00021133 | 0.30179  | -0.0621929 | 0.660384   | BGIOSGA023354 | XP_002439933.1 CTD nuclear envelope phosphatase 1 homolog                                                  |
| TCONS_00017958 | 0.301832 | 0.177819   | 1.11106    | BGIOSGA000547 | XP_006662977.1 probable prefoldin subunit 2                                                                |
| TCONS_00033688 | 0.302049 | -0.289866  | 0.708284   | BGIOSGA037401 | XP_015691939.1 PREDICTED: uncharacterized protein LOC107304087                                             |
| TCONS_00014358 | 0.302638 | -1.27306   | -2.39672   | BGIOSGA027644 | XP_006644223.1 chaperone protein dnaJ 15                                                                   |
| TCONS_00001022 | 0.302666 | 0.329593   | 1.12877    | BGIOSGA021571 | XP_004982450.1 subtilisin-like protease SBT1.7                                                             |
| TCONS_00010489 | 0.302752 | 0.124426   | -0.54175   | BGIOSGA009142 | XP_006650555.1 putative rRNA methyltransferase YibH                                                        |
| TCONS_00013136 | 0.30278  | 0.726102   | 0.587296   | BGIOSGA027270 | XP_003579641.1 sucrose nonfermenting 4-like protein isoform X1                                             |
| TCONS_00015819 | 0.302788 | -0.44589   | 0.307649   | BGIOSGA015167 | XP_015692069.1 actin-related protein 9 isoform X2                                                          |
| TCONS_00015389 | 0.302852 | 0.481807   | 0.782128   | BGIOSGA015982 | XP_015689332.1 oligopeptide transporter 4                                                                  |
| TCONS_00008628 | 0.30304  | -2.13774   | -0.352599  | BGIOSGA022028 | XP_004969282.1 serine/threonine-protein kinase STY8                                                        |
| TCONS_00001448 | 0.303052 | 0.167349   | 0.156532   | BGIOSGA013062 | XP_006658433.1 transmembrane protein 184A-like                                                             |
| TCONS_00023415 | 0.303279 | 0.604331   | 0.944465   | BGIOSGA025448 | XP_015693099.1 shaggy-related protein kinase alpha                                                         |
| TCONS_00018573 | 0.303392 | 0.23932    | 1.00028    | BGIOSGA002161 | XP_006652009.1 prohibitin-1, mitochondrial-like                                                            |
| TCONS_00013408 | 0.303513 | 1.62049    | 1.83272    | BGIOSGA009579 | XP_006652796.1 serine/threonine-protein kinase HTT1-like                                                   |
| TCONS_00016587 | 0.303539 | 1.1487     | 0.654314   | BGIOSGA013800 | XP_015696099.1 MOB kinase activator-like 1A                                                                |
| TCONS_00025963 | 0.303683 | -0.343306  | 0.983855   | BGIOSGA010549 | XP_006644351.1 transcriptional corepressor LEUNIG-like isoform X2                                          |
| TCONS_00003951 | 0.303688 | 0.391581   | 0.40057    | BGIOSGA001243 | XP_015696535.1 PREDICTED: uncharacterized protein LOC102720352                                             |
| TCONS_00029566 | 0.303727 | 0.828462   | 0.850845   | BGIOSGA030253 | XP_003578516.1 protein XAP5 CIRCADIAN TIMEKEEPER                                                           |
| TCONS_00029402 | 0.303748 | 0.286756   | 0.508189   | BGIOSGA013489 | XP_006644338.1 PREDICTED: uncharacterized protein LOC102701389                                             |
| TCONS_00001289 | 0.3038   | 0.267489   | 0.570455   | BGIOSGA033437 | XP_006662825.1 dirigent protein 21-like                                                                    |
| TCONS_00033169 | 0.303844 | -3.27156   | -1.44367   | BGIOSGA021088 | XP_006663095.1 auxilin-related protein 2-like                                                              |
| TCONS_00033970 | 0.303907 | 1.5874     | 0.893702   | BGIOSGA020019 | XP_015690995.1 nucleolin isoform X3                                                                        |
| TCONS_00009692 | 0.303964 | -0.53518   | 0.169482   | BGIOSGA036627 | XP_003579224.1 transcription factor HHO6                                                                   |
| TCONS_00036325 | 0.304008 | -0.376151  | 0.138773   | BGIOSGA001094 | XP_010237221.1 F-box/LRR-repeat protein 14                                                                 |
| TCONS_00014060 | 0.304204 | 1.09237    | 1.40474    | BGIOSGA036081 |                                                                                                            |



transcriptome

|                |          |            |            |               |                                                                                           |
|----------------|----------|------------|------------|---------------|-------------------------------------------------------------------------------------------|
| TCONS_0000698  | 0.304427 | -0.090959  | 0.128097   | BGIOSGA003290 | XP_006644079.1 protoporphyrinogen oxidase, chloroplastic                                  |
| TCONS_00032439 | 0.304598 | 0.359615   | 0.108413   | BGIOSGA031678 | XP_006662448.2PREDICTED: uncharacterized protein LOC102718871                             |
| TCONS_00014618 | 0.304995 | -0.516741  | -0.268164  | BGIOSGA024525 | XP_006652529.1 IAA-amino acid hydrolase ILR1-like 5                                       |
| TCONS_00006633 | 0.30501  | 0.556053   | 0.628187   | BGIOSGA008798 | XP_004953433.2lysophospholipid acyltransferase 1                                          |
| TCONS_00030522 | 0.305094 | 0.614005   | -1.02655   | BGIOSGA006534 | XP_015696261.1PREDICTED: uncharacterized protein At2g39795, mitochondrial-like isoform X1 |
| TCONS_00035136 | 0.305302 | -0.678826  | 0.509407   | BGIOSGA035236 | XP_003571252.1putative F-box protein At2g33200                                            |
| TCONS_00015239 | 0.30534  | 0.361034   | -0.125574  | BGIOSGA015740 | XP_006653094.1 fatty acid amide hydrolase isoform X1                                      |
| TCONS_00019920 | 0.305345 | -0.247333  | 0.195136   | BGIOSGA017442 | XP_006654881.1 26S proteasome regulatory subunit RPN13                                    |
| TCONS_00011049 | 0.30535  | 0.886113   | 1.47873    | BGIOSGA013647 | XP_015690091.1 probable methyltransferase PMT28                                           |
| TCONS_00036106 | 0.305404 | #NA        | -1.12568   | BGIOSGA033779 | XP_006664058.1 LIM domain-containing protein WLM1                                         |
| TCONS_00002068 | 0.305496 | 0.673752   | -1.43205   | BGIOSGA023345 | XP_006646435.1PREDICTED: uncharacterized protein LOC102700298                             |
| TCONS_00006693 | 0.305552 | -0.254776  | -0.301074  | BGIOSGA033503 | XP_006647730.1 TOM1-like protein 2                                                        |
| TCONS_00017068 | 0.305736 | #NA        | -0.174658  | #N/A          | #N/A                                                                                      |
| TCONS_00003792 | 0.305957 | -0.106336  | 0.267231   | BGIOSGA001419 | XP_006644269.1 RWD domain-containing protein 1                                            |
| TCONS_00019900 | 0.305974 | 1.68568    | 0.859808   | BGIOSGA017464 | XP_006654861.1 paired amphipathic helix protein Sin3-like 5 isoform X2                    |
| TCONS_00025575 | 0.306256 | 0.589655   | 0.98928    | BGIOSGA026319 | XP_010235101.1DEAD-box ATP-dependent RNA helicase 36                                      |
| TCONS_00037506 | 0.306447 | -1.11198   | -1.88936   | BGIOSGA035862 | XP_006664730.1 C-factor                                                                   |
| TCONS_00006093 | 0.306496 | -0.0577426 | 0.564566   | BGIOSGA003800 | XP_006647286.1 heat stress transcription factor A-5-like                                  |
| TCONS_00023993 | 0.306573 | 0.725756   | 0.44176    | BGIOSGA033112 | XP_006657892.1 heterogeneous nuclear ribonucleoprotein 1                                  |
| TCONS_00028180 | 0.306664 | -0.0186811 | 0.42369    | BGIOSGA026804 | XP_006659501.2 IMPACT family member in pol 5'region                                       |
| TCONS_00022536 | 0.306722 | -0.28694   | -1.67018   | BGIOSGA021766 | XP_006657119.1 phosphatidylinositol/phosphatidylcholine transfer protein SFH2-like        |
| TCONS_00023187 | 0.307101 | -0.0672749 | 0.770637   | BGIOSGA023649 | XP_006656526.1 DNA-binding protein RHL1                                                   |
| TCONS_00016987 | 0.307123 | 1.1431     | 1.04844    | BGIOSGA019035 | XP_006653963.1 DEAD-box ATP-dependent RNA helicase 17                                     |
| TCONS_00016425 | 0.30728  | 0.419353   | -0.45233   | BGIOSGA004541 | XP_006643834.1 aquaporin SIP1-1                                                           |
| TCONS_00023444 | 0.307361 | 0.851667   | 0.177762   | BGIOSGA033900 | XP_021310801.1uncharacterized protein LOC110433303 isoform X1                             |
| TCONS_00018905 | 0.307636 | -1.71379   | 2.09763    | BGIOSGA018990 | XP_006655132.1 probable glucan 1,3-beta-glucosidase A                                     |
| TCONS_00015796 | 0.307725 | 0.553221   | 0.560873   | BGIOSGA016303 | XP_006652220.1 zinc finger CCH domain-containing protein 27                               |
| TCONS_00025517 | 0.308024 | 0.127371   | -0.0689602 | BGIOSGA012850 | XP_002463169.1probable small nuclear ribonucleoprotein G                                  |
| TCONS_00036656 | 0.308103 | -0.250911  | -0.471652  | BGIOSGA028495 | XP_006659342.1 transcription initiation factor IIE subunit alpha                          |
| TCONS_00025534 | 0.308426 | -0.0986872 | 1.09074    | BGIOSGA023899 | XP_015694727.1 zinc finger CCH domain-containing protein 62-like                          |
| TCONS_00029349 | 0.308568 | -0.218523  | -0.285642  | BGIOSGA029560 | XP_015696423.1 UDP-glycosyltransferase 74F2-like                                          |
| TCONS_00007989 | 0.308577 | 1.15139    | 0.43874    | BGIOSGA015335 | XP_015689602.1 aspartic proteinase-like protein 2 isoform X1                              |
| TCONS_00014342 | 0.30874  | 0.101599   | 0.61343    | BGIOSGA014738 | XP_006652340.1 mitochondrial uncoupling protein 3                                         |
| TCONS_00007131 | 0.309546 | 0.25488    | -0.200371  | BGIOSGA001488 | XP_006648144.2 protein BTR1                                                               |
| TCONS_00024078 | 0.309632 | #NA        | 0.126734   | BGIOSGA019932 | NP_001136465.1uncharacterized protein LOC100216576                                        |
| TCONS_00033758 | 0.309745 | 0.0953489  | -0.968819  | BGIOSGA033689 | XP_006663018.1 wheatwin-1-like                                                            |
| TCONS_00018121 | 0.309799 | 1.10936    | 0.922246   | BGIOSGA020175 | XP_006654638.1 cleavage stimulating factor 64-like                                        |
| TCONS_00005237 | 0.30984  | 1.11258    | 0.747104   | BGIOSGA013544 | XP_015689265.1 DEXH-box ATP-dependent RNA helicase DEXH12                                 |
| TCONS_00022446 | 0.310012 | 0.792986   | 0.639336   | BGIOSGA012197 | XP_006656173.1 transmembrane 9 superfamily member 7                                       |
| TCONS_00004906 | 0.310178 | -1.19248   | 0.434654   | BGIOSGA000315 | XP_015698577.1 OTU domain-containing protein At3g57810-like                               |
| TCONS_00008094 | 0.310199 | 0.391298   | 0.969445   | BGIOSGA006357 | XP_015688614.1 WD repeat-containing protein LWD1-like                                     |
| TCONS_00035987 | 0.310469 | 0.0996946  | 0.436742   | BGIOSGA020334 | XP_006650655.1 CASP-like protein 5C1                                                      |
| TCONS_00018560 | 0.310479 | 0.377976   | 1.32336    | BGIOSGA030850 | XP_015692469.1 solute carrier family 40 member 3, chloroplastic-like                      |
| TCONS_00023954 | 0.310501 | -0.235346  | -0.129011  | BGIOSGA025986 | XP_006657874.1 adenyllyl-sulfate kinase 3                                                 |
| TCONS_00021469 | 0.310558 | 0.217095   | 0.793412   | BGIOSGA008573 | XP_006656562.1 pentatricopeptide repeat-containing protein At5g27270                      |
| TCONS_00001063 | 0.310627 | -0.735702  | 0.446179   | BGIOSGA003679 | XP_006644247.2 general transcription factor 3C polypeptide 5-like                         |
| TCONS_00003281 | 0.31066  | 0.631764   | 0.602825   | BGIOSGA019055 | XP_006644032.1 uncharacterized isomerase BH0283-like                                      |
| TCONS_00025812 | 0.310717 | -0.576142  | -2.4905    | BGIOSGA018174 | XP_012702109.1beta-carotene isomerase D27, chloroplastic                                  |
| TCONS_00005731 | 0.310826 | -0.151845  | -0.597216  | BGIOSGA007846 | XP_015688527.1PREDICTED: uncharacterized protein LOC102714621                             |
| TCONS_00020051 | 0.310946 | -0.0738    | 1.13323    | BGIOSGA026706 | XP_006655747.1 uncharacterized ABC transporter ATP-binding protein C825.01                |
| TCONS_00014283 | 0.31108  | -0.162441  | 0.388578   | BGIOSGA018676 | XP_006653408.2PREDICTED: uncharacterized protein At4g26450                                |
| TCONS_00020037 | 0.31113  | 0.154169   | 0.360946   | BGIOSGA003321 | XP_015693792.1 peroxisomal membrane protein 11-5                                          |

transcriptome

|                |          |            |            |               |                                                                                  |
|----------------|----------|------------|------------|---------------|----------------------------------------------------------------------------------|
| TCONS_00009323 | 0.311312 | 1.2021     | 1.65566    | BGIOSGA011867 | XP_006649408.1 nephrocystin-3-like                                               |
| TCONS_00004622 | 0.311328 | 0.255144   | -0.926407  | BGIOSGA033226 | XP_003564479.1 calcium uniporter protein 6, mitochondrial isoform X2             |
| TCONS_00024630 | 0.312038 | -0.335606  | -0.615468  | BGIOSGA019294 | XP_004955561.1 ubiquitin-conjugating enzyme E2 2                                 |
| TCONS_00006491 | 0.312232 | #NA        | -3.46471   | BGIOSGA002316 | XP_015689603.1 uncharacterized membrane protein At1g06890-like                   |
| TCONS_00009743 | 0.312295 | 0.250165   | 0.203829   | BGIOSGA031563 | XP_006649811.1 SH3 domain-containing protein 2-like                              |
| TCONS_00015865 | 0.312339 | -1.05979   | -1.14304   | BGIOSGA036595 | XP_006653380.2 transcription factor E2FA-like isoform X2                         |
| TCONS_00013372 | 0.312442 | 1.88761    | 1.46077    | BGIOSGA008326 | XP_006652138.1 probable protein S-acyltransferase 14                             |
| TCONS_00031625 | 0.3126   | -0.167035  | -0.295696  | BGIOSGA011626 | XP_015697140.1 quinone oxidoreductase 1-like                                     |
| TCONS_00001814 | 0.3126   | -0.112587  | -0.378158  | BGIOSGA025735 | XP_006646319.1 dihydroorotase, mitochondrial                                     |
| TCONS_00001832 | 0.312638 | -0.0444007 | -0.068123  | BGIOSGA004467 | XP_006646327.1 tobamovirus multiplication protein 1                              |
| TCONS_00030552 | 0.312702 | 1.14514    | 0.520359   | BGIOSGA027530 | XP_015696608.1 PREDICTED: uncharacterized protein LOC102714952                   |
| TCONS_00010339 | 0.31297  | 0.339866   | 0.191523   | BGIOSGA012915 | NP_001148102.1 DNA binding protein                                               |
| TCONS_00034515 | 0.312976 | -2.86795   | -1.14462   | BGIOSGA011309 | XP_006662819.1 alcohol dehydrogenase 2-like                                      |
| TCONS_00026880 | 0.313015 | -0.119361  | 0.397983   | BGIOSGA020128 | XP_006659546.2 F-box protein At-B                                                |
| TCONS_00026743 | 0.313091 | -0.387363  | 0.599154   | BGIOSGA012071 | XP_015696006.1 urease isoform X1                                                 |
| TCONS_00028842 | 0.313195 | 0.247845   | 0.445344   | BGIOSGA020263 | XP_006660565.1 mitochondrial outer membrane protein porin 1                      |
| TCONS_00025668 | 0.313205 | -0.443852  | 0.173273   | BGIOSGA011595 | XP_002465724.1 uncharacterized protein LOC8081911 isoform X2                     |
| TCONS_00034246 | 0.313249 | 0.0145302  | -0.146683  | BGIOSGA034556 | XP_006662714.1 protein ZINC INDUCED FACILITATOR-LIKE 1-like isoform X3           |
| TCONS_00015016 | 0.313347 | 1.03847    | -0.467474  | BGIOSGA027551 | XP_006652870.1 transcription factor bHLH112-like                                 |
| TCONS_00004449 | 0.313363 | -1.01566   | 0.285031   | BGIOSGA000773 | XP_015695137.1 PREDICTED: uncharacterized protein LOC102704847                   |
| TCONS_00002203 | 0.313429 | -0.703912  | 0.162979   | BGIOSGA004838 | XP_006645054.1 PREDICTED: uncharacterized protein YnbD-like isoform X1           |
| TCONS_00018314 | 0.313763 | 0.266333   | 0.114744   | BGIOSGA023694 | XP_006655591.1 60S ribosomal protein L18a-like protein                           |
| TCONS_00002355 | 0.313769 | -1.30586   | -1.49951   | BGIOSGA025518 | XP_006646572.1 4-coumarate--CoA ligase-like 6                                    |
| TCONS_00016258 | 0.313973 | -3.45417   | -1.35355   | BGIOSGA007967 | XP_006652513.1 casein kinase I-like isoform X1                                   |
| TCONS_00003285 | 0.313984 | 1.39757    | 0.700875   | BGIOSGA035578 | XP_015693716.1 protein SAD1/UNC-84 domain protein 1-like                         |
| TCONS_00006472 | 0.31405  | 0.557412   | 0.544887   | BGIOSGA008643 | XP_006647533.1 succinyl-CoA ligase [ADP-forming] subunit beta, mitochondrial     |
| TCONS_00033579 | 0.314262 | 0.608091   | -0.301771  | BGIOSGA021589 | XP_006662965.1 succinate dehydrogenase assembly factor 2, mitochondrial          |
| TCONS_00034254 | 0.314563 | -0.115057  | 0.336873   | BGIOSGA000455 | XP_006664843.2 cytochrome P450 94B3-like                                         |
| TCONS_00027670 | 0.314787 | 0.309936   | 0.841575   | BGIOSGA013964 | XP_015695548.1 tetraspanin-8-like                                                |
| TCONS_00023465 | 0.315102 | 0.585634   | 0.748606   | BGIOSGA026258 | XP_015694894.1 protein MAK16 homolog A                                           |
| TCONS_00034035 | 0.315333 | -2.85436   | -1.70211   | BGIOSGA033565 | XP_006663108.1 PREDICTED: uncharacterized protein LOC102720559                   |
| TCONS_00021923 | 0.315349 | -0.65744   | 0.58848    | BGIOSGA012815 | XP_003564036.1 RING-H2 finger protein ATL46                                      |
| TCONS_00015044 | 0.315356 | 1.23855    | 0.471857   | BGIOSGA037921 | XP_002448626.1 V-type proton ATPase subunit D                                    |
| TCONS_00019291 | 0.315689 | 0.419321   | 0.614206   | BGIOSGA018060 | XP_015692861.1 PREDICTED: LOW QUALITY PROTEIN: uncharacterized protein Cbei_0202 |
| TCONS_00005723 | 0.315802 | 0.39781    | 0.771967   | BGIOSGA007840 | XP_015689375.1 citrate synthase, glyoxysomal-like                                |
| TCONS_00013516 | 0.316026 | -0.470239  | 0.0390576  | BGIOSGA031780 | XP_006650877.1 ras-related protein RABA2a-like                                   |
| TCONS_00028656 | 0.316255 | 0.0586713  | 1.04891    | BGIOSGA036218 | XP_004966126.1 disease resistance protein RPM1                                   |
| TCONS_00017143 | 0.31626  | -0.362413  | -0.0815131 | BGIOSGA019189 | XP_006654056.1 bifunctional protein FOLD 2                                       |
| TCONS_00017061 | 0.316464 | -0.955944  | 0.037372   | BGIOSGA003709 | XP_006654003.1 ocs element-binding factor 1-like                                 |
| TCONS_00009107 | 0.316651 | 0.898063   | 0.561701   | BGIOSGA005294 | XP_006648184.1 PREDICTED: uncharacterized protein LOC102715180                   |
| TCONS_00025525 | 0.316724 | 0.286275   | 1.02719    | BGIOSGA026325 | XP_015695410.1 elongation factor 1-delta 1                                       |
| TCONS_00035109 | 0.317058 | 0.223946   | -0.615229  | BGIOSGA033702 | XP_015697941.1 GDP-mannose 3,5-epimerase 2 isoform X2                            |
| TCONS_00008521 | 0.317227 | -0.310075  | 0.44663    | BGIOSGA014596 | XP_015688682.1 PREDICTED: uncharacterized protein LOC102707846                   |
| TCONS_00003644 | 0.317373 | -0.0389254 | -0.284702  | BGIOSGA023577 | XP_003567622.1 protein DETOXIFICATION 12 isoform X1                              |
| TCONS_00034387 | 0.317515 | 1.22151    | 0.629657   | BGIOSGA037310 | XP_003577783.1 calcium-dependent protein kinase 24                               |
| TCONS_00011269 | 0.317591 | 0.878324   | 0.0425891  | BGIOSGA024533 | XP_006650845.1 protein transport protein SEC13 homolog B-like                    |
| TCONS_00000517 | 0.317642 | -0.506843  | -2.60087   | BGIOSGA017051 | XP_003566154.1 glutaredoxin domain-containing cysteine-rich protein CG12206      |
| TCONS_00021659 | 0.317974 | 0.0677193  | 0.492022   | BGIOSGA021862 | XP_006655817.1 protein capicua homolog                                           |
| TCONS_00028373 | 0.318376 | 0.623776   | 0.894539   | BGIOSGA026590 | XP_004961658.1 glutamate-1-semialdehyde 2,1-aminomutase, chloroplast             |
| TCONS_00017078 | 0.318429 | -2.85121   | -0.883339  | BGIOSGA005230 | XP_015693223.1 peroxidase 2-like isoform X2                                      |
| TCONS_00021897 | 0.318656 | 0.843065   | 0.77057    | BGIOSGA009056 | XP_004966817.1 transcription termination factor MTERF2, chloroplast              |
| TCONS_00030070 | 0.318882 | 0.484326   | -0.151989  | BGIOSGA016698 | XP_015696770.1 S-adenosylmethionine decarboxylase prenylase-like                 |
| TCONS_00002477 | 0.318916 | 1.04894    | 1.8505     | BGIOSGA005121 | XP_006645289.1 putative cullin-like protein 2 isoform X1                         |
| TCONS_00005526 | 0.319124 | -1.76342   | -1.02852   | BGIOSGA006201 | XP_004952859.1 sugar transport protein MST1 isoform X1                           |
| TCONS_00020776 | 0.319179 | 1.03173    | 0.144789   | BGIOSGA022972 | XP_004951891.1 probable transcription factor At1g11510                           |
| TCONS_00022670 | 0.320054 | -1.07648   | -0.0527946 | BGIOSGA012337 | XP_006656310.1 anthocyanidin reductase-like                                      |

transcriptome

|                |          |            |            |               |                                                                                  |
|----------------|----------|------------|------------|---------------|----------------------------------------------------------------------------------|
| TCONS_00005369 | 0.320098 | 0.425833   | 0.353666   | BGIOSGA024533 | XP_006646853.1 protein transport protein SEC13 homolog B-like                    |
| TCONS_00016390 | 0.320336 | -0.509062  | 0.0498     | BGIOSGA014575 | XP_015691760.1 serine racemase                                                   |
| TCONS_00020442 | 0.320386 | 0.339725   | 0.831489   | BGIOSGA014117 | XP_014752936.1probable inactive poly [ADP-ribose] polymerase SRO1 isoform X2     |
| TCONS_00025412 | 0.320467 | 0.501781   | 0.189036   | BGIOSGA039190 | XP_003562826.1geranylgeranyl pyrophosphate synthase, chloroplastic               |
| TCONS_00014120 | 0.320758 | -0.36603   | 1.07657    | BGIOSGA029054 | XP_002446304.1protein NUCLEAR FUSION DEFECTIVE 4                                 |
| TCONS_00001653 | 0.320767 | -0.719789  | 0.300011   | BGIOSGA004286 | XP_006644580.2PREDICTED: uncharacterized protein LOC102701670                    |
| TCONS_00007100 | 0.32083  | -1.24731   | -2.9454    | #N/A          | #N/A                                                                             |
| TCONS_00029889 | 0.321176 | 1.64567    | 0.88221    | BGIOSGA022549 | XP_015696318.1 bystin                                                            |
| TCONS_00003487 | 0.321226 | 0.164265   | 0.536687   | BGIOSGA019216 | XP_006644141.2 serine/threonine-protein phosphatase 4 regulatory subunit 3       |
| TCONS_00030248 | 0.321237 | 0.0510218  | 0.0150129  | BGIOSGA007026 | XP_015696393.1 E3 ubiquitin-protein ligase UPL5                                  |
| TCONS_00036239 | 0.321355 | 0.466727   | 0.678653   | BGIOSGA037597 | XP_006664103.1 probable prefoldin subunit 3                                      |
| TCONS_00031053 | 0.321364 | 0.245655   | 0.859177   | BGIOSGA032872 | XP_015697426.1PREDICTED: uncharacterized protein C18orf8                         |
| TCONS_00006886 | 0.321784 | 1.56058    | 0.380606   | BGIOSGA003306 | XP_015689036.1 photosynthetic NDH subunit of luminal location 4, chloroplastic   |
| TCONS_00016369 | 0.321876 | 0.00195205 | 0.0612693  | BGIOSGA014599 | XP_015692199.1 probable isoaspartyl peptidase/L-asparaginase 3                   |
| TCONS_00016579 | 0.321941 | -0.761575  | -0.613672  | BGIOSGA014390 | XP_006652787.1 probable plastid-lipid-associated protein 8, chloroplastic        |
| TCONS_00015258 | 0.32216  | -3.5311    | -0.726825  | BGIOSGA013573 | XP_008653318.2 ervatamin-B                                                       |
| TCONS_00002134 | 0.322408 | 0.119529   | 0.812147   | BGIOSGA021762 | XP_021313862.1ruvB-like protein 1                                                |
| TCONS_00016988 | 0.322433 | -1.68222   | -0.738785  | BGIOSGA019036 | XP_002439135.2PGR5-like protein 1B, chloroplastic                                |
| TCONS_00020332 | 0.322564 | 2.02745    | 1.0692     | BGIOSGA032057 | XP_003564112.1STOREKEEPER protein                                                |
| TCONS_00003874 | 0.322633 | 0.77509    | 1.31947    | BGIOSGA022237 | XP_006646034.1 peptidyl-prolyl cis-trans isomerase CYP57                         |
| TCONS_00030570 | 0.322838 | 1.02711    | 0.639672   | BGIOSGA013292 | XP_006659707.1 protein SRC2 homolog NP_001147667.1ATP-dependent protease Clp     |
| TCONS_00010345 | 0.322944 | 0.0623112  | 0.887715   | BGIOSGA020035 | ATPase subunit                                                                   |
| TCONS_00022700 | 0.322999 | 0.272014   | 0.135228   | BGIOSGA006734 | XP_004965642.1bZIP transcription factor RISBZ5                                   |
| TCONS_00010220 | 0.323616 | -2.89395   | -1.70633   | BGIOSGA014527 | XP_006651457.1 phospho-2-dehydro-3-deoxyheptonate aldolase 1, chloroplastic      |
| TCONS_00031523 | 0.323843 | -0.103315  | -0.374503  | BGIOSGA025665 | XP_006661985.1 probable glutathione S-transferase GSTU6                          |
| TCONS_00011463 | 0.323852 | 0.587232   | 0.598359   | BGIOSGA010422 | XP_006649291.1 tobamovirus multiplication protein 3-like isoform X1              |
| TCONS_00024698 | 0.323954 | 0.0744921  | 0.736582   | BGIOSGA009627 | XP_006657522.1PREDICTED: uncharacterized protein LOC102704820 isoform X1         |
| TCONS_00022560 | 0.324183 | 0.17741    | -1.32715   | BGIOSGA034480 | XP_006657133.1 transcription factor TGA2-like isoform X1                         |
| TCONS_00026257 | 0.324266 | 1.03812    | 0.995421   | BGIOSGA004347 | XP_006659992.1 DNA-directed RNA polymerase III subunit RPC5 isoform X1           |
| TCONS_00030483 | 0.324269 | -1.72959   | 0.513938   | BGIOSGA029325 | XP_003578579.1probable flavin-containing monooxygenase 1                         |
| TCONS_00020329 | 0.324387 | 0.21565    | 1.56541    | BGIOSGA029292 | XP_003564116.1probable tyrosine-protein phosphatase DSP2                         |
| TCONS_00001412 | 0.324392 | -0.0933329 | -0.186919  | BGIOSGA010862 | XP_006644400.1 protein REDUCED WALL ACETYLATION 3-like                           |
| TCONS_00006212 | 0.324522 | 0.11927    | 0.237185   | BGIOSGA016381 | XP_004952670.12-Cys peroxiredoxin BAS1, chloroplastic                            |
| TCONS_00031127 | 0.324546 | 0.920161   | 0.572914   | BGIOSGA011909 | XP_010234743.1putative DNA helicase ino80                                        |
| TCONS_00027245 | 0.32491  | -0.9318    | 0.210448   | BGIOSGA015524 | XP_006659761.1 L-gulonolactone oxidase 2-like                                    |
| TCONS_00011535 | 0.325036 | 0.302249   | 0.685645   | BGIOSGA005200 | XP_015690813.1 splicing factor U2af large subunit B-like                         |
| TCONS_00028304 | 0.325107 | -1.0383    | 1.79272    | BGIOSGA021183 | XP_004973949.1methyltransferase-like protein 13                                  |
| TCONS_00001383 | 0.325297 | -0.0184381 | -0.0579171 | BGIOSGA004015 | XP_004969201.1myosin IC heavy chain                                              |
| TCONS_00007796 | 0.32584  | 0.888808   | 0.903962   | BGIOSGA031388 | XP_008663616.160S ribosomal protein L27-3                                        |
| TCONS_00007095 | 0.325848 | 0.741067   | 0.190228   | BGIOSGA011486 | XP_010940715.1 60S ribosomal protein L23                                         |
| TCONS_00023491 | 0.32588  | 0.760237   | 0.713039   | BGIOSGA015575 | XP_006658475.1 FBD-associated F-box protein At3g52670-like                       |
| TCONS_00035572 | 0.325978 | 0.727691   | 0.475755   | BGIOSGA019906 | XP_015698213.1 protein trichome birefringence-like 11                            |
| TCONS_00031467 | 0.32599  | 0.25798    | 0.832826   | BGIOSGA029396 | XP_006662514.1 small G protein signaling modulator 2                             |
| TCONS_00013154 | 0.326019 | 0.762201   | 0.215885   | BGIOSGA028741 | XP_006651806.2PREDICTED: uncharacterized protein LOC102710863                    |
| TCONS_00021758 | 0.326042 | 1.15082    | 1.03748    | BGIOSGA004762 | XP_003635231.2 ruvB-like 2                                                       |
| TCONS_00010806 | 0.326146 | 0.824952   | 0.547663   | BGIOSGA013430 | XP_006650485.2 protein CASP                                                      |
| TCONS_00007546 | 0.326512 | 0.724644   | 0.819693   | BGIOSGA009859 | XP_006647035.1 50S ribosomal protein L7/L12                                      |
| TCONS_00029033 | 0.326512 | -1.92506   | -0.873486  | BGIOSGA030785 | XP_010914051.1 5'-nucleotidase domain-containing protein DDB_G0275467 isoform X2 |
| TCONS_00014393 | 0.326656 | 0.341532   | 0.189398   | BGIOSGA016548 | XP_006652365.1 30S ribosomal protein 3, chloroplastic-like                       |
| TCONS_00010667 | 0.326714 | 0.0150567  | 0.37143    | BGIOSGA013291 | XP_015690009.1 GPI mannosyltransferase 1                                         |
| TCONS_00027261 | 0.326921 | 0.603948   | 1.07133    | BGIOSGA014855 | XP_015695965.1PREDICTED: uncharacterized protein LOC102699707 isoform X2         |
| TCONS_00034539 | 0.32705  | 0.690259   | 0.80235    | BGIOSGA036490 | XP_006662831.1 mRNA-capping enzyme-like                                          |
| TCONS_00007858 | 0.327053 | 0.707914   | 0.585315   | BGIOSGA014632 | XP_006647202.1 myosin-13-like                                                    |
| TCONS_00026661 | 0.327314 | -0.0488107 | 0.616834   | BGIOSGA030749 | XP_006660160.1PREDICTED: uncharacterized protein LOC102705837 isoform X1         |
| TCONS_00007869 | 0.32737  | 0.256088   | -0.658957  | BGIOSGA006607 | XP_006664943.1 ATP synthase mitochondrial F1 complex assembly factor 1           |
| TCONS_00029070 | 0.327425 | -1.14338   | -0.867997  | BGIOSGA000697 | XP_006660653.1 ethylene-responsive transcription factor 1-like                   |

transcriptome

|                |          |            |            |               |                                                                                  |
|----------------|----------|------------|------------|---------------|----------------------------------------------------------------------------------|
| TCONS_00012886 | 0.327483 | -3.264     | -0.53825   | BGIOSGA000747 | XP_015690864.1 transmembrane protein 56-B-like                                   |
| TCONS_00014217 | 0.32756  | -2.18754   | -0.906415  | BGIOSGA015690 | XP_006652269.2 photosystem I subunit O                                           |
| TCONS_00008830 | 0.327825 | 0.921293   | 1.16209    | BGIOSGA024292 | XP_006649062.1 7-deoxyloganetin glucosyltransferase-like                         |
| TCONS_00011212 | 0.327983 | -0.598109  | -0.396241  | BGIOSGA004694 | XP_004981292.1KH domain-containing protein SPIN1                                 |
| TCONS_00036121 | 0.32836  | 1.68459    | 0.576405   | BGIOSGA037480 | XP_015698598.1PREDICTED: uncharacterized protein LOC107305428                    |
| TCONS_00030211 | 0.328562 | 0.417665   | 1.07384    | BGIOSGA028876 | NP_001123600.1methyl binding domain protein 117                                  |
| TCONS_00029774 | 0.328736 | 0.865238   | 1.44788    | BGIOSGA036597 | NP_001105952.1plastid phosphate/phosphoenolpyruvate translocator 1               |
| TCONS_00002176 | 0.328874 | 1.04303    | -1.46419   | BGIOSGA004812 | XP_006646483.1 heme-binding-like protein At3g10130, chloroplastic                |
| TCONS_00020981 | 0.328938 | 0.293973   | -0.0846315 | BGIOSGA022458 | XP_006656207.1 26S protease regulatory subunit 8 homolog A-like                  |
| TCONS_00026936 | 0.328947 | 0.237743   | 1.58031    | BGIOSGA028987 | XP_006659582.1PREDICTED: uncharacterized protein LOC102712192                    |
| TCONS_00003880 | 0.328957 | -0.521599  | -1.63838   | BGIOSGA001333 | XP_004969401.1uncharacterized protein LOC101758396                               |
| TCONS_00008460 | 0.328971 | 1.5543     | 1.30605    | BGIOSGA031623 | XP_006647580.1 ALG-2 interacting protein X-like                                  |
| TCONS_00004125 | 0.32919  | 0.458266   | 1.17425    | BGIOSGA020372 | XP_022682647.1CTD small phosphatase-like protein 2-A                             |
| TCONS_00027418 | 0.329358 | 0.945847   | 1.06758    | BGIOSGA027587 | XP_015696211.1 thyroid adenoma-associated protein homolog isoform X1             |
| TCONS_00034705 | 0.329435 | 0.0424791  | 0.357007   | BGIOSGA034128 | XP_006662895.1 plant UBX domain-containing protein 11                            |
| TCONS_00001718 | 0.329648 | 0.521226   | 1.82593    | BGIOSGA012000 | XP_003569701.3probable serine acetyltransferase 1                                |
| TCONS_00002636 | 0.329877 | 0.840614   | 0.553068   | BGIOSGA011835 | XP_015688333.1 protein TRIGALACTOSYLDIACYLGLYCEROL 2, chloroplastic              |
| TCONS_00029357 | 0.330003 | 0.563859   | 0.0975655  | BGIOSGA012638 | XP_006661447.1 probable 1-acylglycerol-3-phosphate O-acyltransferase             |
| TCONS_00022181 | 0.330033 | 0.829717   | 0.432869   | BGIOSGA021315 | NP_001105880.1bundle sheath defective 2                                          |
| TCONS_00031514 | 0.330047 | 0.544372   | -0.280349  | BGIOSGA018056 | NP_001130938.1glutathione S-transferase GSTU6                                    |
| TCONS_00032546 | 0.330068 | 0.777136   | 1.52572    | BGIOSGA012688 | XP_006661945.1 CDPK-related kinase 3-like                                        |
| TCONS_00008513 | 0.330129 | 1.66763    | 0.793584   | BGIOSGA037648 | XP_015689401.1 ethylene-responsive transcription factor 1-like                   |
| TCONS_00011218 | 0.330354 | -0.139946  | 0.121846   | BGIOSGA013820 | XP_006651955.1 SCAR-like protein 1 isoform X1                                    |
| TCONS_00007580 | 0.330382 | 1.36921    | 0.508483   | BGIOSGA029561 | XP_004951506.1UDP-glycosyltransferase 73C1                                       |
| TCONS_00021353 | 0.330439 | 1.62924    | 0.304961   | BGIOSGA012552 | XP_002437563.1protein RER1A                                                      |
| TCONS_00011253 | 0.330728 | 0.60223    | 0.414893   | BGIOSGA013852 | XP_006651977.1 protein DEFECTIVE IN EXINE FORMATION 1                            |
| TCONS_00011435 | 0.331137 | -0.170963  | -0.279077  | #N/A          | #N/A                                                                             |
| TCONS_00020494 | 0.331207 | 0.30929    | 0.45032    | BGIOSGA021039 | XP_006655990.1 NAC domain-containing protein 8-like                              |
| TCONS_00013236 | 0.331474 | 0.160462   | -0.222355  | BGIOSGA009752 | XP_002463825.130S ribosomal protein S9, chloroplastic                            |
| TCONS_00001689 | 0.331509 | 1.63011    | 0.42257    | BGIOSGA010289 | XP_006644609.2 glucan endo-1,3-beta-glucosidase GII-like                         |
| TCONS_00005729 | 0.331596 | 0.664264   | 0.323185   | BGIOSGA007844 | XP_015688526.1 U-box domain-containing protein 4-like                            |
| TCONS_00023149 | 0.331671 | 0.208748   | 0.284133   | BGIOSGA037816 | XP_006657459.2 ubiquitin carboxyl-terminal hydrolase 8                           |
| TCONS_00036855 | 0.332073 | 1.21362    | 0.602341   | BGIOSGA029761 | XP_015698243.1PREDICTED: uncharacterized protein ycf45                           |
| TCONS_00008168 | 0.332148 | 0.409251   | 0.577065   | BGIOSGA006271 | XP_004952824.1N-glycosylase/DNA lyase OGG1                                       |
| TCONS_00010503 | 0.332189 | 0.095553   | -0.093459  | BGIOSGA013113 | XP_015689969.1 serpin-ZXA                                                        |
| TCONS_00020330 | 0.332277 | 1.03416    | 1.08963    | BGIOSGA013760 | XP_015693491.1 lysM domain-containing GPI-anchored protein 1-like                |
| TCONS_00029584 | 0.332306 | 0.782403   | 0.0908042  | BGIOSGA012378 | XP_006653073.1PREDICTED: uncharacterized protein LOC102708432                    |
| TCONS_00009056 | 0.332383 | 0.544834   | 1.06859    | BGIOSGA005348 | XP_006648130.2 DNL-type zinc finger protein                                      |
| TCONS_00029579 | 0.33243  | 0.122093   | 1.23609    | BGIOSGA030238 | XP_006660418.1 pentatricopeptide repeat-containing protein At1g79540             |
| TCONS_00000035 | 0.332467 | 0.961656   | 1.15636    | BGIOSGA008896 | XP_004967948.1RING-box protein 1                                                 |
| TCONS_00008806 | 0.332804 | 0.49443    | 0.00931866 | BGIOSGA011170 | XP_015689372.1 AP2-like ethylene-responsive transcription factor PLT1 isoform X1 |
| TCONS_00033440 | 0.332949 | 1.51208    | 0.742193   | BGIOSGA033757 | XP_021317268.1formin-like protein 14                                             |
| TCONS_00014171 | 0.333029 | 0.0701721  | 0.447963   | BGIOSGA004332 | XP_002446386.1probable alpha-amylase 2                                           |
| TCONS_00009280 | 0.333294 | -0.278531  | -0.320265  | BGIOSGA011819 | XP_002468542.2antifreeze protein Maxi                                            |
| TCONS_00033957 | 0.333519 | 0.335821   | 0.454545   | BGIOSGA035647 | XP_015698118.1 peptide chain release factor APG3, chloroplastic                  |
| TCONS_00034654 | 0.333539 | -0.640665  | 0.4632     | BGIOSGA034174 | XP_015698100.1 general transcription factor 3C polypeptide 3 isoform X2          |
| TCONS_00037128 | 0.334081 | -0.0154108 | -0.0126746 | BGIOSGA036244 | XP_006663983.2 fideglin-like protein 1                                           |
| TCONS_00015572 | 0.334088 | -0.0978532 | -0.194438  | BGIOSGA015395 | XP_015691395.1 metal tolerance protein C4                                        |
| TCONS_00012330 | 0.334173 | 0.335113   | -0.356528  | BGIOSGA001986 | XP_010228580.1probable transcription factor At3g04930                            |
| TCONS_00006524 | 0.334268 | 0.0844969  | 0.293766   | BGIOSGA020754 | XP_006647584.1 putative nuclear RNA export factor SDE5                           |
| TCONS_00006336 | 0.334355 | 0.553453   | 1.17869    | BGIOSGA008499 | XP_006648787.1PREDICTED: uncharacterized protein LOC102714988                    |
| TCONS_00013535 | 0.334438 | 0.439701   | 0.618271   | BGIOSGA036998 | XP_015690330.1 purple acid phosphatase 15                                        |
| TCONS_00013202 | 0.334487 | 0.473654   | 0.573477   | BGIOSGA009785 | XP_006650611.1 transmembrane protein adipocyte-associated 1 homolog              |
| TCONS_00004035 | 0.334504 | 0.0239518  | 0.756591   | BGIOSGA035658 | XP_006646132.1PREDICTED: uncharacterized protein LOC102721130                    |

transcriptome

|                |          |            |             |              |                                                                                                         |
|----------------|----------|------------|-------------|--------------|---------------------------------------------------------------------------------------------------------|
| TCONS_00035716 | 0.334811 | 0.8815     | 0.413042    | BGOSGA035059 | XP_015698239.1 CCR4-NOT transcription complex subunit 11-like                                           |
| TCONS_00005200 | 0.334841 | 0.125505   | 0.54736     | BGOSGA000007 | XP_006645413.1 2-methoxy-6-polyprenyl-1,4-benzoquinol methylase, mitochondrial                          |
| TCONS_00012474 | 0.334886 | 1.60203    | 1.21132     | BGOSGA010508 | XP_006651510.1 erlin-2-B<br>XP_006656217.1 SPX domain-containing protein 1                              |
| TCONS_00022527 | 0.335242 | -0.46942   | 0.485564    | BGOSGA013541 | XP_015698643.1 ureide permease 2-like                                                                   |
| TCONS_00037232 | 0.335263 | -0.40323   | 3.08131     | BGOSGA036142 | XP_015690282.1 putative ALA-interacting subunit 2                                                       |
| TCONS_00011081 | 0.335408 | -0.296738  | 0.448831    | BGOSGA017683 | XP_006652621.1 vesicle-associated protein 1-3-like isoform X1                                           |
| TCONS_00014723 | 0.335423 | -4.57336   | -0.412131   | BGOSGA034174 | XP_002455016.1 uncharacterized protein LOC8084349 isoform X2                                            |
| TCONS_00003007 | 0.335451 | 1.55085    | 1.15992     | BGOSGA002210 | XP_006653555.1 probable E3 ubiquitin-protein ligase AR18                                                |
| TCONS_00014501 | 0.335664 | -0.0501984 | 0.55549     | BGOSGA031083 | XP_006658923.1 UDP-N-acetylglucosamine--dolichyl-phosphate N-acetylglucosaminophosphotransferase        |
| TCONS_00025654 | 0.336064 | 0.704854   | 0.659748    | BGOSGA023771 | XP_003567883.1 uncharacterized protein LOC100843260                                                     |
| TCONS_00019806 | 0.336168 | 0.305984   | 0.558209    | BGOSGA001991 |                                                                                                         |
| TCONS_00007428 | 0.33628  | 1.18044    | 0.9183      | BGOSGA007051 | XP_015689365.1 urease accessory protein D-like<br>XP_015690101.1 nuclear pore complex protein NUP1-like |
| TCONS_00011097 | 0.336432 | 0.396141   | -0.73232    | BGOSGA004651 | XP_006657552.1 remorin-like                                                                             |
| TCONS_00023335 | 0.33645  | -0.174727  | -1.05411    | BGOSGA024059 | XP_015693109.1 ADP.ATP carrier protein 1, mitochondrial-like                                            |
| TCONS_00019019 | 0.336505 | 1.3384     | 0.587507    | BGOSGA034703 | XP_002449623.1 uncharacterized protein LOC8064827                                                       |
| TCONS_00033600 | 0.336532 | 1.60846    | 1.37453     | BGOSGA035386 | XP_015696498.1 DNA repair protein RAD51 homolog 4                                                       |
| TCONS_00029570 | 0.336691 | -1.11553   | -0.585226   | BGOSGA030248 | XP_002442120.1 uncharacterized protein LOC8063244                                                       |
| TCONS_00037167 | 0.336795 | 0.262916   | 0.707822    | BGOSGA036204 | XP_015698516.1 bis(5'-adenosyl)-triphosphatase-like                                                     |
| TCONS_00032872 | 0.337171 | -0.359807  | -0.120425   | BGOSGA036903 | XP_006654137.1 transcription factor MYB1R1-like                                                         |
| TCONS_00018776 | 0.337237 | -0.649653  | -1.24555    | BGOSGA029380 | XP_006644941.1 GDSL esterase/lipase At1g58430-like                                                      |
| TCONS_00004656 | 0.337402 | -3.57586   | -0.586999   | BGOSGA000560 | XP_002452476.1 phosphoenolpyruvate carboxylase kinase 2                                                 |
| TCONS_00006485 | 0.337402 | 1.12458    | 0.413001    | BGOSGA005545 | XP_022680243.1 fatty acyl-CoA reductase 1                                                               |
| TCONS_00024974 | 0.337467 | -1.57594   | -0.00219693 | BGOSGA024420 | XP_006647560.1 ADP-ribosylation factor                                                                  |
| TCONS_00006504 | 0.337677 | -0.68945   | 0.183899    | BGOSGA005983 | GTPase-activating protein AGD2-like isoform X2                                                          |
| TCONS_00005697 | 0.337769 | -0.109138  | -0.149475   | BGOSGA008052 | XP_015696777.1 peroxisomal nicotinamide adenine dinucleotide carrier-like                               |
| TCONS_00016056 | 0.337838 | -2.40234   | -1.75393    | BGOSGA006169 | XP_015691951.1 PREDICTED: uncharacterized protein LOC107304097 isoform X2                               |
| TCONS_00009608 | 0.337867 | 0.112942   | 0.314293    | BGOSGA012153 | XP_015691167.1 nuclear pore complex protein NUP133 isoform X2                                           |
| TCONS_00030357 | 0.338458 | -0.522556  | 0.164322    | BGOSGA029442 | XP_002454783.2 GTPase-activating protein gyp1 isoform X2                                                |
| TCONS_00004044 | 0.338616 | -3.57739   | -3.17498    | BGOSGA005767 | XP_006644410.1 epoxide hydrolase 3-like                                                                 |
| TCONS_00002397 | 0.338702 | -0.83229   | -2.03698    | BGOSGA012162 | XP_006645210.1 thioredoxin F, chloroplastic                                                             |
| TCONS_00009702 | 0.338764 | 0.345666   | 0.545723    | BGOSGA012252 | XP_006649761.1 protein FAR1-RELATED SEQUENCE 9-like                                                     |
| TCONS_00023381 | 0.338913 | 0.0484571  | 0.153101    | BGOSGA025419 | XP_006657577.1 cytochrome b5 domain-containing protein RLF                                              |
| TCONS_00000001 | 0.338974 | 0.905451   | 0.546049    | BGOSGA025839 | XP_006643619.1 small G protein signaling modulator 1-like isoform X2                                    |
| TCONS_00003659 | 0.339077 | 2.11659    | 1.09422     | BGOSGA019679 | XP_006645934.1 universal stress protein A-like protein                                                  |
| TCONS_00032648 | 0.339087 | -1.56053   | -0.410139   | BGOSGA031306 | XP_024316763.1 short-chain dehydrogenase TIC 32, chloroplastic                                          |
| TCONS_00035628 | 0.339258 | 0.743726   | 0.215743    | BGOSGA017393 | XP_004977309.1 uncharacterized protein LOC101776555                                                     |
| TCONS_00032544 | 0.339363 | 1.37586    | 1.77736     | BGOSGA031573 | XP_004986438.1 protein ROOT PRIMORDIUM DEFECTIVE 1                                                      |
| TCONS_00006711 | 0.33953  | 2.97604    | 0.992676    | BGOSGA035907 | XP_006647748.1 pentatricopeptide repeat-containing protein OTP51, chloroplastic                         |
| TCONS_00037871 | 0.339662 | 0.361451   | -0.51623    | #N/A         | #N/A                                                                                                    |
| TCONS_00037405 | 0.339915 | -0.565794  | -1.10445    | BGOSGA020656 | XP_006664128.1 PREDICTED: uncharacterized protein LOC102704577                                          |
| TCONS_00030501 | 0.340052 | 0.268795   | -1.50047    | BGOSGA013557 | XP_006661515.1 SRSF protein kinase 1                                                                    |
| TCONS_00016319 | 0.340173 | 0.0840158  | 0.128131    | BGOSGA033901 | XP_006652582.1 vacuolar-processing enzyme beta-isozyme 1                                                |
| TCONS_00032727 | 0.340267 | -0.469728  | -1.7389     | BGOSGA031378 | XP_006662080.1 chlorophyllide a oxygenase, chloroplastic                                                |
| TCONS_00005280 | 0.34039  | 0.998641   | 1.28005     | BGOSGA007387 | XP_015692420.1 signal peptide peptidase 2-like                                                          |
| TCONS_00034737 | 0.340623 | 0.611604   | 0.842434    | BGOSGA035180 | XP_006664993.1 protein KT112 homolog                                                                    |
| TCONS_00008878 | 0.340876 | 1.22712    | 1.65231     | BGOSGA009227 | XP_006647971.2 protein CPR-5-like<br>XP_006646990.1 ent-cassadiene C2-hydroxylase-like                  |
| TCONS_00005577 | 0.340995 | 0.373809   | 0.626481    | BGOSGA003815 | XP_006652350.1 ubiquitin carboxyl-terminal hydrolase 4-like                                             |
| TCONS_00015992 | 0.341024 | -0.183265  | 0.286222    | BGOSGA006203 |                                                                                                         |
| TCONS_00004222 | 0.341036 | -0.354052  | -0.051022   | BGOSGA002747 | NP_001151105.2 DNA-binding protein RAV1                                                                 |
| TCONS_00036635 | 0.341241 | 0.0631607  | 0.403481    | BGOSGA007345 | XP_004978608.1 U3 small nucleolar ribonucleoprotein protein MPP10                                       |
| TCONS_00023361 | 0.341426 | 0.259236   | 0.149667    | BGOSGA006569 | XP_004955819.1 ADP-ribosylation factor 1                                                                |
| TCONS_00015588 | 0.341559 | -0.251772  | 0.443227    | BGOSGA006506 | XP_006652162.1 oligoribonuclease-like isoform X2                                                        |
| TCONS_00017877 | 0.341674 | 0.234952   | 0.254818    | BGOSGA032837 | NP_001149606.1 beta-hydroxyacyl-ACP dehydratase                                                         |

transcriptome

|                |          |             |           |               |                                                                                                                                |
|----------------|----------|-------------|-----------|---------------|--------------------------------------------------------------------------------------------------------------------------------|
| TCONS_00032418 | 0.341678 | -1.99628    | -1.01263  | BGIOSGA037430 | XP_002464494.2long-chain-alcohol oxidase FAO1                                                                                  |
| TCONS_00005529 | 0.34181  | 0.951642    | 0.265291  | BGIOSGA030264 | XP_015689581.1 choline-phosphate cytidyltransferase 2                                                                          |
| TCONS_00035001 | 0.34225  | 0.406396    | 0.415344  | BGIOSGA020728 | XP_006662971.2 probable Xaa-Pro aminopeptidase P                                                                               |
| TCONS_00023692 | 0.342335 | -1.17247    | -1.13504  | BGIOSGA025724 | XP_015695036.1 vacuolar protein sorting-associated protein 32 homolog 1-like                                                   |
| TCONS_00009549 | 0.342341 | 0.225279    | -0.37684  | BGIOSGA012095 | XP_006649615.1 serine-rich adhesin for platelets-like                                                                          |
| TCONS_00019085 | 0.342528 | -1.2049     | 0.477618  | BGIOSGA026577 | XP_006659637.1 transcription factor bHLH137-like isoform X1                                                                    |
| TCONS_00006115 | 0.342533 | 0.218113    | 0.736286  | BGIOSGA008271 | XP_002452138.1chromatin assembly factor 1 subunit A                                                                            |
| TCONS_00015607 | 0.342789 | 1.20878     | 0.762103  | BGIOSGA023600 | XP_003579141.2protein WHAT'S THIS FACTOR 1                                                                                     |
| TCONS_00012122 | 0.342902 | 0.17664     | 0.74585   | BGIOSGA010888 | XP_015690884.1 PH-interacting protein-like                                                                                     |
| TCONS_00023166 | 0.343221 | 0.452076    | 0.65186   | BGIOSGA025205 | XP_006658307.1 proline-tRNA ligase, chloroplastic/mitochondrial                                                                |
| TCONS_00019357 | 0.343289 | -0.523554   | -0.012163 | BGIOSGA009334 | XP_003568383.1embryogenesis-associated protein EMB8                                                                            |
| TCONS_00024145 | 0.343436 | 0.204686    | -0.728764 | BGIOSGA026182 | XP_006657982.1 dnaJ-like protein MG002 homolog                                                                                 |
| TCONS_00013265 | 0.343669 | -0.793695   | -0.920979 | BGIOSGA009722 | XP_004981558.1photosystem I reaction center subunit III, chloroplastic                                                         |
| TCONS_00032684 | 0.343781 | -0.958454   | -0.181927 | BGIOSGA031423 | XP_002464938.1metalloendoproteinase 1-MMP                                                                                      |
| TCONS_00020003 | 0.343846 | 0.0569604   | -0.453207 | BGIOSGA033068 | XP_015694371.1 protein ENHANCED DISEASE RESISTANCE 2-like                                                                      |
| TCONS_00037377 | 0.343848 | 0.937577    | 0.590813  | BGIOSGA035987 | XP_003578816.1UNC93-like protein 3 isoform X2                                                                                  |
| TCONS_00005875 | 0.344478 | -0.00776067 | 0.194722  | BGIOSGA031736 | XP_015689419.1 WD repeat-containing protein 26                                                                                 |
| TCONS_00010001 | 0.34483  | -0.417903   | 0.212962  | BGIOSGA012553 | XP_004984501.1protein PHOSPHATE STARVATION RESPONSE 1                                                                          |
| TCONS_00007015 | 0.344836 | 0.593909    | 0.518252  | BGIOSGA017615 | XP_006649128.1 flocculation protein FLO11-like                                                                                 |
| TCONS_00009268 | 0.344904 | 0.066271    | -0.653844 | BGIOSGA011805 | XP_006649359.1PREDICTED: uncharacterized protein LOC102714990                                                                  |
| TCONS_00018484 | 0.344907 | 0.690053    | 0.704508  | BGIOSGA018949 | NP_001278564.1RAB5-interacting protein                                                                                         |
| TCONS_00014894 | 0.344921 | 0.741858    | 0.522761  | BGIOSGA017075 | XP_014661073.1nuclear pore complex protein NUP88                                                                               |
| TCONS_00025645 | 0.344926 | 0.154637    | 0.657359  | BGIOSGA023781 | XP_006658063.1 ankyrin repeat domain-containing protein 2A                                                                     |
| TCONS_00017532 | 0.345133 | 1.98353     | 1.37763   | BGIOSGA019605 | XP_006654255.1 protein SSUH2 homolog                                                                                           |
| TCONS_00030026 | 0.345306 | 0.736134    | 0.69918   | BGIOSGA007539 | XP_006661212.1 dihydrolypolylysine-residue acetyltransferase component 4 of pyruvate dehydrogenase complex, chloroplastic-like |
| TCONS_00009700 | 0.34544  | -1.03924    | -3.72499  | BGIOSGA012250 | XP_015689835.1PREDICTED: uncharacterized protein LOC102699852                                                                  |
| TCONS_00030279 | 0.345443 | -2.20463    | -1.17419  | BGIOSGA029528 | XP_006660780.1 cinnamoyl-CoA reductase 1-like                                                                                  |
| TCONS_00026161 | 0.345785 | -0.394176   | -0.656075 | #N/A          | #N/A                                                                                                                           |
| TCONS_00019180 | 0.346171 | -0.586885   | -0.388566 | BGIOSGA018173 | XP_006654324.2 vesicle-associated protein 2-2-like                                                                             |
| TCONS_00036646 | 0.346204 | 1.04533     | 0.494617  | BGIOSGA034527 | XP_006664317.2 cytochrome c-type biogenesis ccdA-like chloroplastic protein 1                                                  |
| TCONS_00007968 | 0.346324 | -1.36648    | -0.862876 | BGIOSGA006513 | XP_015699051.1 extracellular ribonuclease-like                                                                                 |
| TCONS_00031205 | 0.346425 | 2.53421     | 1.53963   | BGIOSGA008907 | XP_021307373.1heavy metal-associated isoprenylated plant protein 3 isoform X2                                                  |
| TCONS_00036141 | 0.346533 | 0.281416    | 0.610539  | BGIOSGA037497 | XP_006664068.1 pentatricopeptide repeat-containing protein At4g02820, mitochondrial                                            |
| TCONS_00018904 | 0.346637 | -1.6516     | -1.71165  | BGIOSGA003204 | XP_003566408.1probable glucan 1,3-beta-glucosidase A                                                                           |
| TCONS_00013431 | 0.346736 | 0.495479    | 0.500705  | BGIOSGA009553 | XP_006650807.1 zinc finger protein GIS2-like                                                                                   |
| TCONS_00009790 | 0.346852 | 1.32951     | 0.824321  | BGIOSGA030551 | XP_006649859.1 histone H2B.1                                                                                                   |
| TCONS_00017221 | 0.346863 | 0.603523    | 1.40825   | BGIOSGA019261 | XP_006648138.1 mediator of RNA polymerase II transcription subunit 36a-like                                                    |
| TCONS_00010967 | 0.346865 | -0.0692713  | -0.299037 | BGIOSGA013567 | XP_006650594.2 transmembrane protein 256 homolog isoform X2                                                                    |
| TCONS_00017928 | 0.347051 | 0.517222    | 0.553049  | BGIOSGA013615 | XP_006655373.1 protein YIPF1 homolog                                                                                           |
| TCONS_00005643 | 0.347188 | -0.687715   | -0.633361 | BGIOSGA020935 | XP_006647058.1 serine-threonine kinase receptor-associated protein 1                                                           |
| TCONS_00026054 | 0.347443 | 0.511045    | 0.607662  | BGIOSGA028120 | XP_003565163.1protein PIN-LIKES 2                                                                                              |
| TCONS_00030393 | 0.347494 | -0.754973   | -0.325272 | BGIOSGA016943 | XP_015696720.1 RHOMBoid-like protein 2                                                                                         |
| TCONS_00023720 | 0.347549 | -0.112177   | -1.90654  | BGIOSGA001476 | XP_006658584.2PREDICTED: uncharacterized protein LOC102703050                                                                  |
| TCONS_00001771 | 0.347688 | 0.488369    | -2.78983  | BGIOSGA022272 | XP_006644666.1 anthocyanidin 5,3-O-glucosyltransferase-like                                                                    |
| TCONS_00022949 | 0.347709 | 0.728523    | 0.554269  | BGIOSGA020603 | XP_006657370.2 photosystem II stability/assembly factor HCF136, chloroplastic                                                  |
| TCONS_00018918 | 0.347829 | 1.23497     | 0.67134   | BGIOSGA023065 | XP_006654194.1 xylanase inhibitor protein 2-like                                                                               |
| TCONS_00032432 | 0.347847 | -0.912252   | -0.489168 | #N/A          | #N/A                                                                                                                           |
| TCONS_00037574 | 0.347856 | -0.309163   | -0.523834 | BGIOSGA035785 | XP_006664228.1 haloacid dehalogenase-like hydrolase domain-containing protein At3g48420                                        |
| TCONS_00027979 | 0.347975 | 1.23186     | 1.60589   | BGIOSGA028490 | XP_015695438.1 elongation factor Ts, mitochondrial                                                                             |
| TCONS_00005208 | 0.347995 | -0.519561   | -0.464589 | BGIOSGA035799 | XP_006655669.1 cysteine synthase-like                                                                                          |
| TCONS_00007884 | 0.348011 | -0.417466   | 0.186639  | BGIOSGA016888 | XP_006648577.1PREDICTED: uncharacterized protein LOC102704397                                                                  |
| TCONS_00006648 | 0.348174 | -0.702622   | -0.425946 | BGIOSGA016977 | XP_015689660.1 mechanosensitive ion channel protein 1, mitochondrial-like isoform X1                                           |
| TCONS_00036782 | 0.348182 | 0.458487    | 0.712896  | BGIOSGA006268 | XP_004977222.1probable L-ascorbate peroxidase 6, chloroplastic/mitochondrial                                                   |
| TCONS_00030373 | 0.348427 | -0.0768179  | 0.741078  | #N/A          | #N/A                                                                                                                           |

transcriptome

|                 |          |             |             |               |                                                                            |
|-----------------|----------|-------------|-------------|---------------|----------------------------------------------------------------------------|
| TCONS_00017335  | 0.348514 | 0.0882225   | 0.0738437   | BGIOSGA016391 | XP_006654159.2 protein trichome birefringence-like 26                      |
| TCONS_00022863  | 0.349034 | 0.0261681   | -0.637936   | BGIOSGA035632 | XP_006657312.1 PREDICTED: uncharacterized protein LOC102707132             |
| TCONS_00024588  | 0.349157 | 0.0744515   | 0.304875    | BGIOSGA024805 | XP_004955476.1 uncharacterized protein LOC101765325                        |
| TCONS_00008046  | 0.349168 | 0.562265    | -0.242119   | BGIOSGA015216 | XP_006647277.1 F-box/kelch-repeat protein At1g67480                        |
| TCONS_00020996  | 0.34922  | 0.188873    | 0.311564    | BGIOSGA006926 | XP_015693629.1 calcium-binding mitochondrial carrier protein SCaMC-1-like  |
| TCONS_00008366  | 0.349286 | 0.683431    | 0.312025    | BGIOSGA006059 | XP_006647502.1 nuclear cap-binding protein subunit 2                       |
| TCONS_00026778  | 0.349343 | -0.359909   | -0.0377469  | BGIOSGA028841 | XP_003574622.1 DPH4 homolog                                                |
| TCONS_00031636  | 0.34938  | 0.917355    | 0.503749    | BGIOSGA014859 | XP_015697362.1 peptide methionine sulfoxide reductase A4, chloroplast-like |
| TCONS_00025881  | 0.349732 | 0.215523    | 0.716839    | BGIOSGA027951 | XP_006659804.2 tryptophan synthase beta chain 1                            |
| TCONS_00008646  | 0.34991  | 0.201229    | 0.377282    | BGIOSGA001973 | XP_015689621.1 syntaxin-22-like isoform X2                                 |
| TCONS_00017494  | 0.349954 | 0.526444    | 0.314607    | BGIOSGA021467 | XP_006655994.1 signal peptidase complex catalytic subunit SEC11A-like      |
| TCONS_00032863  | 0.350153 | -0.651271   | -0.851321   | BGIOSGA023430 | XP_010931361.1 RING-H2 finger protein ATL74-like isoform X1                |
| TCONS_00014513  | 0.350161 | 0.117018    | 0.152241    | BGIOSGA016676 | XP_006650349.1 protein IQ-DOMAIN 1-like                                    |
| TCONS_00025425  | 0.350307 | -0.0973744  | -0.00554128 | BGIOSGA001298 | XP_015694887.1 A-kinase anchor protein 17A                                 |
| TCONS_00003933  | 0.350463 | -0.134838   | -0.0494437  | BGIOSGA001585 | XP_006644394.2 cytochrome P450 72A15-like                                  |
| TCONS_00018368  | 0.350527 | 0.748659    | 0.483909    | BGIOSGA022897 | XP_015692729.1 mitogen-activated protein kinase 17                         |
| TCONS_00011427  | 0.350652 | 0.40342     | 0.610321    | BGIOSGA013953 | XP_015690169.1 transcription factor BTF3 homolog 4-like isoform X2         |
| TCONS_00016229  | 0.350705 | 0.356092    | 0.708535    | BGIOSGA014745 | XP_015692232.1 coiled-coil domain-containing protein 115 isoform X1        |
| TCONS_00034302  | 0.350808 | 1.18869     | 0.260469    | BGIOSGA035008 | XP_006663205.2 pyruvate kinase 1, cytosolic-like                           |
| TCONS_00009671  | 0.351139 | -0.230728   | -0.991551   | BGIOSGA012925 | XP_015691224.1 calmodulin-lysine N-methyltransferase isoform X2            |
| TCONS_00021804  | 0.351172 | 0.385613    | -0.249786   | BGIOSGA005340 | XP_006655891.1 serine/threonine-protein kinase At5g01020-like              |
| TCONS_00001715  | 0.351225 | -0.431222   | -0.978474   | BGIOSGA023481 | XP_006646268.1 fe-S cluster assembly factor HCF101, chloroplast-like       |
| TCONS_00030672  | 0.351301 | 0.877915    | -0.0669002  | BGIOSGA020112 | XP_006662164.1 PREDICTED: uncharacterized protein LOC102721866             |
| TCONS_00017727  | 0.351392 | 0.926319    | 0.141829    | BGIOSGA019789 | XP_004962205.150S ribosomal protein L1, chloroplast-like                   |
| TCONS_00017723  | 0.351494 | 0.996164    | 0.464266    | BGIOSGA019783 | XP_006654347.1 UDP-sulfoquinovose synthase, chloroplast-like               |
| TCONS_00023332  | 0.351586 | 0.427115    | 0.494872    | BGIOSGA009436 | XP_015698937.1 CTD small phosphatase-like protein 2                        |
| TCONS_00004726  | 0.351601 | 0.50566     | -0.407752   | BGIOSGA031780 | XP_006645011.1 ras-related protein Rab2BV-like                             |
| TCONS_00002742  | 0.351631 | 1.54889     | 1.75675     | BGIOSGA002484 | XP_006643706.1 Bowman-Birk type bran trypsin inhibitor-like                |
| TCONS_00003124  | 0.351695 | -0.543713   | -0.347284   | BGIOSGA032855 | XP_004977297.1 GDGL esterase/lipase At5g45910                              |
| TCONS_00007386  | 0.351716 | 0.220507    | 1.14026     | BGIOSGA007090 | XP_015688463.1 protein SCO1 homolog 1, mitochondrial                       |
| TCONS_00000137  | 0.351889 | -1.40159    | -0.67151    | BGIOSGA017615 | XP_008673758.1 uncharacterized protein LOC103649836                        |
| TCONS_000032520 | 0.352133 | -1.2938     | -1.87629    | BGIOSGA018754 | XP_006662494.1 remorin-like                                                |
| TCONS_00035895  | 0.352165 | -1.10298    | 0.172282    | BGIOSGA037266 | XP_002439072.1 exosome complex component RRP42                             |
| TCONS_00002892  | 0.352406 | -0.53065    | -0.195166   | BGIOSGA002326 | XP_006643787.1 PREDICTED: uncharacterized protein LOC102702045             |
| TCONS_00020305  | 0.352729 | 0.954899    | 0.811804    | BGIOSGA022162 | XP_002444829.1 UMP-CMP kinase 4                                            |
| TCONS_00016754  | 0.352881 | -0.380628   | 0.063057    | BGIOSGA010709 | XP_013461038.1 alpha-N-acetylglucosaminidase family protein                |
| TCONS_00011593  | 0.353021 | -0.00175647 | 0.00563691  | BGIOSGA028036 | XP_015690235.1 PREDICTED: uncharacterized protein LOC102713811             |
| TCONS_00019194  | 0.353157 | 0.875583    | 1.76981     | BGIOSGA020646 | XP_006654336.2 probable methyltransferase PMT7                             |
| TCONS_00019689  | 0.353308 | 1.3876      | 1.64696     | BGIOSGA035205 | XP_006655522.1 pentatricopeptide repeat-containing protein At3g49240-like  |
| TCONS_00017920  | 0.353345 | -1.81847    | 0.172831    | BGIOSGA016983 | XP_006655371.2 PREDICTED: uncharacterized protein LOC102709370             |
| TCONS_00033870  | 0.353539 | 1.07502     | 2.19157     | BGIOSGA005093 | XP_006663062.1 E3 ubiquitin-protein ligase At3g02290-like                  |
| TCONS_00004916  | 0.353582 | 0.33663     | 0.627905    | BGIOSGA015052 | XP_004970961.1 peptidyl serine alpha-galactosyltransferase                 |
| TCONS_00009732  | 0.353779 | -0.441914   | 0.371512    | BGIOSGA024992 | XP_006649799.1 sulfoquinovosyl transferase SQD2-like                       |
| TCONS_00019043  | 0.353924 | 0.650514    | 1.14678     | BGIOSGA000043 | XP_006645341.1 small nuclear ribonucleoprotein Sm D2-like                  |
| TCONS_00010012  | 0.354534 | 0.332027    | -0.192711   | BGIOSGA012565 | XP_006650040.1 eukaryotic translation initiation factor 2 subunit beta     |
| TCONS_00024552  | 0.354543 | -0.671941   | 0.493847    | BGIOSGA024839 | XP_015695045.1 classical arabinogalactan protein 9-like                    |
| TCONS_00010171  | 0.354831 | 1.36276     | 1.56033     | BGIOSGA033535 | XP_015690754.1 protein LTV1 homolog isoform X1                             |
| TCONS_00032768  | 0.354851 | 1.60806     | 0.468664    | BGIOSGA031342 | XP_015697495.1 PREDICTED: uncharacterized protein LOC102706507             |
| TCONS_00014695  | 0.355006 | -0.300569   | 0.178879    | BGIOSGA008737 | XP_006652603.1 ubiquitin carboxyl-terminal hydrolase 3-like                |
| TCONS_00035170  | 0.35509  | -0.405641   | 0.168471    | BGIOSGA036456 | XP_006663043.1 putative 14-3-3-like protein GF14-H                         |
| TCONS_00027612  | 0.355722 | 0.841488    | 1.08443     | BGIOSGA003844 | NP_001344639.1 putative WRKY DNA-binding domain superfamily protein        |

transcriptome

|                |          |            |            |              |                                                                                                                                     |
|----------------|----------|------------|------------|--------------|-------------------------------------------------------------------------------------------------------------------------------------|
| TCONS_00012014 | 0.355737 | 1.3703     | 0.551524   | BGOSGA010994 | XP_006651253.1 probable ADP-ribosylation factor GTPase-activating protein AGD6<br>XP_015692813.1 lipid phosphate phosphatase 2-like |
| TCONS_00019738 | 0.355751 | 0.178487   | 0.640757   | BGOSGA035267 | XP_006663811.1 suppressor of mec-8 and unc-52 protein homolog 2                                                                     |
| TCONS_00034288 | 0.355753 | 0.354567   | 0.753591   | BGOSGA036646 | YP_008815731.1 photosystem II protein D1 (plastid)                                                                                  |
| TCONS_00035890 | 0.355818 | 1.03656    | 1.41913    | #N/A         | XP_006656336.2 tRNA pseudouridine synthase A                                                                                        |
| TCONS_00022716 | 0.355892 | 0.531946   | 0.903441   | BGOSGA020733 |                                                                                                                                     |
| TCONS_00002952 | 0.355916 | -0.669099  | -0.061923  | BGOSGA002265 | XP_015699174.1 aspartate aminotransferase                                                                                           |
| TCONS_00037311 | 0.35592  | 0.691373   | 1.58736    | BGOSGA036058 | XP_006664608.1 rRNA-processing protein FYV7                                                                                         |
| TCONS_00032199 | 0.35628  | 1.34774    | 0.865949   | BGOSGA013329 | XP_015697237.1 golgin subfamily A member 5<br>XP_006644529.1 katanin p60 ATPase-containing subunit A1                               |
| TCONS_00001580 | 0.356343 | -0.387074  | 1.04117    | BGOSGA004213 | NP_001169059.1 uncharacterized<br>LOC100382900                                                                                      |
| TCONS_00019391 | 0.356398 | 0.486096   | 0.536662   | BGOSGA004842 | XP_006660637.2 pentatricopeptide repeat-containing protein At4g30825, chloroplastic                                                 |
| TCONS_00029026 | 0.356483 | 0.265988   | 0.00629398 | BGOSGA030779 | XP_015691268.1 ankyrin repeat domain-containing protein, chloroplastic                                                              |
| TCONS_00011530 | 0.356556 | 1.12494    | 0.236377   | BGOSGA011500 | XP_006658713.1 zinc-metallopeptidase, peroxisomal-like                                                                              |
| TCONS_00025374 | 0.356911 | -0.028942  | -0.307118  | BGOSGA004562 | XP_021307823.1 putative F-box/FBD/LRR-repeat protein At4g03220                                                                      |
| TCONS_00023878 | 0.357107 | -1.03895   | -0.890992  | BGOSGA024132 | XP_006652854.1 BTB/POZ and MATH domain-containing protein 2-like                                                                    |
| TCONS_00014985 | 0.357125 | -0.0296969 | 0.25652    | BGOSGA028198 | XP_006658611.1 reactive Intermediate Deaminase A, chloroplastic                                                                     |
| TCONS_00023765 | 0.357158 | -0.0804611 | 1.14614    | BGOSGA025804 | XP_003578003.1 sulfite exporter TauE/Safe family protein 3                                                                          |
| TCONS_00026534 | 0.357162 | 0.319666   | -0.19925   | BGOSGA028601 | XP_010235251.1 FHA domain-containing protein FHA2 isoform X2                                                                        |
| TCONS_00029302 | 0.357233 | 0.176619   | 0.385536   | BGOSGA031045 | XP_021307383.1 metal tolerance protein 2 isoform X1                                                                                 |
| TCONS_00010065 | 0.357578 | 1.5685     | 1.63622    | BGOSGA021015 | XP_015688961.1 putative aminoacrylate hydrolase RuID                                                                                |
| TCONS_00007837 | 0.357624 | 1.39852    | 1.27765    | BGOSGA006646 | XP_006653311.1 PREDICTED: uncharacterized protein LOC102709459                                                                      |
| TCONS_00024988 | 0.357654 | 1.29157    | 1.12146    | BGOSGA006781 | XP_006657669.1 serine/threonine-protein kinase 19                                                                                   |
| TCONS_00023615 | 0.357727 | -0.480049  | 0.0330208  | BGOSGA003090 | NP_001315573.1 uncharacterized protein<br>LOC103637583                                                                              |
| TCONS_00004399 | 0.357744 | -0.211829  | 0.293835   | BGOSGA004398 | XP_015695755.1 nuclear nucleic acid-binding protein C1D                                                                             |
| TCONS_00026261 | 0.358011 | 0.163349   | 0.842642   | BGOSGA028346 | XP_002459031.2 uncharacterized protein<br>LOC8059402                                                                                |
| TCONS_00002843 | 0.358101 | 0.529163   | 0.798423   | BGOSGA024911 | XP_006643685.1 protein SAR DEFICIENT 1-like                                                                                         |
| TCONS_00000147 | 0.358186 | 2.58594    | 0.28364    | BGOSGA002720 | XP_003570347.1 quinone oxidoreductase PIG3                                                                                          |
| TCONS_00007058 | 0.35865  | 0.124516   | 0.479396   | BGOSGA009239 | XP_002463649.1 CASP-like protein 4B3                                                                                                |
| TCONS_00013419 | 0.358832 | -0.993961  | -0.263833  | BGOSGA018257 | XP_006664795.1 carotenoid 9,10(9',10')-cleavage dioxygenase                                                                         |
| TCONS_00036511 | 0.358856 | -0.369652  | -1.09999   | BGOSGA037874 | XP_006648167.1 eukaryotic translation initiation factor 3 subunit G-like                                                            |
| TCONS_00006996 | 0.359103 | 1.05951    | 0.331077   | BGOSGA033418 | XP_006649340.2 probable signal recognition particle 43 kDa protein, chloroplastic                                                   |
| TCONS_00011510 | 0.359181 | 0.203701   | -0.817415  | BGOSGA011517 | XP_003581163.1 histone H2A.Z-specific chaperone CHZ1                                                                                |
| TCONS_00015800 | 0.359249 | 0.865508   | 0.965935   | BGOSGA023659 | XP_015693060.1 solanesyl-diphosphate synthase 2, chloroplastic                                                                      |
| TCONS_00018387 | 0.359336 | -1.69916   | -3.7806    | BGOSGA020439 | NP_001152515.1 holocarboxylase synthetase                                                                                           |
| TCONS_00028838 | 0.35942  | 0.334029   | 0.0115782  | BGOSGA001311 | XP_015691690.1 TBC1 domain family member 13-like                                                                                    |
| TCONS_00014074 | 0.359511 | 0.286417   | 0.085288   | BGOSGA027847 | XP_003574288.1 cytochrome c-type biogenesis protein CcmE homolog, mitochondrial                                                     |
| TCONS_00031584 | 0.359575 | 2.16458    | 1.40359    | BGOSGA033399 |                                                                                                                                     |
| TCONS_00024583 | 0.35958  | 0.130238   | 2.19147    | #N/A         | #N/A                                                                                                                                |
| TCONS_00000921 | 0.359587 | -0.152362  | 0.793152   | BGOSGA002497 | XP_004968116.1 uncharacterized protein<br>LOC101778809                                                                              |
| TCONS_00003303 | 0.359629 | 0.764853   | 0.175284   | BGOSGA000812 | XP_006644047.1 protein DELETION OF SUV3 SUPPRESSOR 1(I)-like                                                                        |
| TCONS_00024321 | 0.359709 | 1.86495    | 0.750652   | BGOSGA022241 | XP_004981248.1 60S ribosome subunit biogenesis protein NIP7 homolog                                                                 |
| TCONS_00001855 | 0.359933 | 0.61801    | 0.208936   | BGOSGA017730 | XP_015689932.1 PREDICTED: LOW QUALITY PROTEIN: uncharacterized protein<br>LOC102718611                                              |
| TCONS_00005423 | 0.36004  | 1.03998    | 0.29554    | BGOSGA020588 | XP_006646879.1 eukaryotic initiation factor 4A-3                                                                                    |
| TCONS_00002819 | 0.360044 | 0.115746   | -0.0710075 | BGOSGA029371 | XP_020406279.1 triosephosphate isomerase, cytosolic-like                                                                            |
| TCONS_00013486 | 0.360102 | 0.0855509  | 0.202446   | BGOSGA035847 | XP_015691098.1 PREDICTED: uncharacterized protein<br>LOC102699671                                                                   |
| TCONS_00027781 | 0.360243 | -0.424199  | 0.60245    | BGOSGA018688 | XP_010234573.1 phosphatidylinositol 3-kinase, root isoform isoform X2                                                               |
| TCONS_00030241 | 0.360258 | 0.0561493  | -0.0971637 | BGOSGA021366 | XP_006661365.2 putative BPI/LBP family protein<br>At1g04970                                                                         |
| TCONS_00018136 | 0.360263 | 0.193319   | 0.597687   | BGOSGA020195 | XP_006654651.1 protein LAZ1 homolog 1                                                                                               |
| TCONS_00036419 | 0.360357 | 1.74916    | 0.648676   | BGOSGA037030 | XP_004976150.1 suppressor protein SRP40                                                                                             |
| TCONS_00000127 | 0.360379 | 0.232594   | 0.199444   | BGOSGA013643 | XP_015688259.1 endonuclease 2-like isoform X2                                                                                       |
| TCONS_00006676 | 0.360656 | -0.0757437 | 0.402824   | BGOSGA001618 | XP_006647712.1 acetylmethionine deacetylase                                                                                         |
| TCONS_00014737 | 0.360862 | 0.303428   | -0.054556  | BGOSGA016914 | XP_015692265.1 15-cis-phytoene desaturase-like                                                                                      |
| TCONS_00013047 | 0.361081 | 2.3095     | 0.341635   | BGOSGA009939 | XP_006651738.1 ACD11 homolog protein-like                                                                                           |



## transcriptome

|                |          |             |            |               |                                                                                           |
|----------------|----------|-------------|------------|---------------|-------------------------------------------------------------------------------------------|
| TCONS_00015959 | 0.36124  | 0.393802    | 0.656599   | BGIOSGA015025 | XP_006652321.1.PREDICTED: uncharacterized protein LOC102719198                            |
| TCONS_00012688 | 0.361422 | -0.306361   | 0.440902   | BGIOSGA014711 | XP_015689966.1.PREDICTED: uncharacterized protein LOC102711143                            |
| TCONS_00010336 | 0.361576 | 1.11711     | 1.05188    | BGIOSGA012911 | XP_008673581.1.RAP domain-containing protein, chloroplastic                               |
| TCONS_00007249 | 0.361635 | -0.00550621 | 0.14513    | BGIOSGA028356 | XP_006646793.1 syntaxin-52-like isoform X2                                                |
| TCONS_00013467 | 0.361665 | 0.218031    | 0.495749   | BGIOSGA012897 | XP_015690368.1 acylpyruvase FAHD1, mitochondrial-like isoform X1                          |
| TCONS_00006372 | 0.361815 | -1.10052    | -0.797469  | BGIOSGA008535 | XP_021315408.1 uncharacterized protein LOC8056473                                         |
|                |          |             |            |               | XP_006660842.1 protein farnesyltransferase/geranylgeranyltransferase type-1 subunit alpha |
| TCONS_00029338 | 0.361819 | -0.824312   | 0.393383   | BGIOSGA031086 | XP_002456895.1 cytochrome P450 89A2                                                       |
| TCONS_00022171 | 0.361845 | 1.50164     | 0.699504   | BGIOSGA001610 | XP_006659312.1 pre-mRNA-splicing factor ATP-dependent RNA helicase DEAH1-like             |
| TCONS_00030725 | 0.362137 | 1.066       | 0.938053   | BGIOSGA027162 | XP_006662713.1 protein ZINC INDUCED FACILITATOR-LIKE 1-like isoform X2                    |
| TCONS_00036626 | 0.362149 | -1.84828    | -1.37216   | BGIOSGA025257 | XP_006655820.1.PREDICTED: uncharacterized protein LOC102712638                            |
| TCONS_00020180 | 0.362545 | -3.71751    | -1.008     | BGIOSGA037599 | XP_006650818.1 calmodulin-binding protein 60 A-like                                       |
| TCONS_00010361 | 0.36262  | 0.570472    | 0.73521    | BGIOSGA009538 | XP_006644938.1 PRA1 family protein B2-like                                                |
| TCONS_00004655 | 0.362674 | 2.03119     | 1.14372    | BGIOSGA020037 | XP_015690212.1 ribonuclease III domain-containing protein RNC1, chloroplastic-like        |
| TCONS_00004592 | 0.363132 | 0.409583    | 1.021      | BGIOSGA000623 | XP_006661478.2 endoglucanase 24                                                           |
| TCONS_00030428 | 0.363293 | -1.89095    | -1.14494   | BGIOSGA020533 | XP_006650928.1 acyl carrier protein 3, chloroplastic-like                                 |
| TCONS_00013567 | 0.363343 | -0.388396   | 0.166323   | BGIOSGA029356 | XP_003575718.1 tryptophan--tRNA ligase, cytoplasmic                                       |
| TCONS_00037314 | 0.363445 | 0.366428    | 1.68571    | BGIOSGA036054 | XP_015693045.1 transcription initiation factor IIA subunit 2                              |
| TCONS_00016972 | 0.363685 | -0.217848   | -0.0693057 | BGIOSGA005261 | XP_015692047.1 phospholipid-transporting ATPase 2-like isoform X3                         |
| TCONS_00029608 | 0.364489 | -1.03793    | 0.416701   | BGIOSGA016636 | XP_006650012.1 ELMO domain-containing protein A                                           |
| TCONS_00009975 | 0.364781 | 0.647658    | 0.543769   | BGIOSGA035269 | XP_020407331.1 co-chaperone protein SBA1 isoform X1                                       |
| TCONS_00027893 | 0.364905 | 1.73738     | 0.14936    | BGIOSGA001657 | XP_003574248.1 protein SAR DEFICIENT 4                                                    |
| TCONS_00031531 | 0.364927 | 1.44266     | 1.15646    | BGIOSGA011914 | XP_002461847.1 F-box/LRR-repeat protein At3g26922                                         |
| TCONS_00024916 | 0.364991 | 0.558933    | 1.02225    | BGIOSGA036017 | XP_003561407.13-oxo-5-alpha-steroid 4-dehydrogenase 2                                     |
| TCONS_00024608 | 0.365299 | -0.875879   | -3.35086   | BGIOSGA026659 | XP_006647989.1 replication factor C subunit 3                                             |
| TCONS_00008900 | 0.365627 | 0.388145    | 0.204767   | BGIOSGA005509 | XP_015694663.1 putative cysteine-rich receptor-like protein kinase 20                     |
| TCONS_00023844 | 0.365718 | 0.532134    | 0.718742   | BGIOSGA014818 | XP_004975780.1 hepatoma-derived growth factor-related protein 2                           |
| TCONS_00014345 | 0.365718 | -0.467866   | -0.203256  | BGIOSGA015726 | XP_015688812.1 mRNA-decapping enzyme subunit 2                                            |
| TCONS_00009003 | 0.365748 | -0.0031937  | 1.42542    | BGIOSGA005404 | XP_015699275.1 BTB/POZ domain-containing protein FBL11-like                               |
| TCONS_00002616 | 0.366253 | 0.650457    | 1.32252    | BGIOSGA021775 | XP_015690516.1 cytochrome P450 709B2-like                                                 |
| TCONS_00010163 | 0.366677 | -2.51586    | -1.59514   | BGIOSGA009326 | XP_004968098.1 uncharacterized protein LOC101772564                                       |
| TCONS_00002730 | 0.367437 | 2.65768     | 0.676777   | BGIOSGA002492 | XP_006660889.2 putative ER lumen protein-retaining receptor C28H8.4                       |
| TCONS_00029395 | 0.368025 | 0.467274    | 1.00358    | BGIOSGA031147 | XP_015694252.1 UMP-CMP kinase 1                                                           |
| TCONS_00019975 | 0.36805  | 1.15924     | 0.449851   | BGIOSGA022501 | XP_021314660.1 reticulocalbin-2                                                           |
| TCONS_00005686 | 0.368067 | 0.834278    | 0.893221   | BGIOSGA001366 | XP_006658550.1 cyclin-dependent kinase-like 5                                             |
| TCONS_00023649 | 0.368075 | 0.0147264   | 0.163641   | BGIOSGA013557 | XP_022683244.1 protein DJ-1 homolog C                                                     |
| TCONS_00018148 | 0.368179 | 1.38483     | 1.25551    | BGIOSGA020206 | XP_006646956.1.PREDICTED: uncharacterized protein LOC102708028                            |
| TCONS_00005541 | 0.368179 | 0.554754    | 0.640177   | BGIOSGA028219 | XP_006649670.1 AP-3 complex subunit sigma                                                 |
| TCONS_00009625 | 0.368335 | -0.393979   | 0.0224264  | BGIOSGA012170 | XP_006664988.1 probable GTP diphosphokinase CRSH2, chloroplastic                          |
| TCONS_00017191 | 0.368511 | -0.767522   | -3.84321   | BGIOSGA018005 | XP_010239812.1 uncharacterized protein LOC100842192                                       |
| TCONS_00014135 | 0.368775 | -0.486753   | -0.70497   | BGIOSGA001690 | XP_006657514.1 C-Myc-binding protein homolog                                              |
| TCONS_00023247 | 0.368881 | -0.822544   | 0.193979   | BGIOSGA025287 | XP_006647367.1 ultraviolet-B receptor UVR8                                                |
| TCONS_00006257 | 0.368948 | -0.77601    | -1.46886   | BGIOSGA017850 | XP_003564002.1 U-box domain-containing protein 21                                         |
| TCONS_00020443 | 0.36896  | 1.38385     | -0.456914  | BGIOSGA026660 | XP_010234546.1 protein ROOT INITIATION DEFECTIVE 3 isoform X1                             |
| TCONS_00024957 | 0.369095 | 0.266203    | 0.808808   | BGIOSGA020321 | XP_006652076.1.PREDICTED: uncharacterized protein LOC102712157                            |
| TCONS_00015299 | 0.369126 | 0.202069    | 0.168361   | BGIOSGA007209 | XP_003563024.1 uncharacterized protein LOC100822827                                       |
| TCONS_00025196 | 0.369251 | -1.27756    | -0.776415  | BGIOSGA011826 | XP_006650753.1 T-complex protein 1 subunit theta                                          |
| TCONS_00011161 | 0.369435 | 1.42094     | 0.896181   | BGIOSGA035491 | XP_006664207.1 50S ribosomal protein HLP, mitochondrial-like                              |
| TCONS_00037537 | 0.369456 | -0.146793   | 0.618932   | BGIOSGA036358 | XP_006650723.1 PITH domain-containing protein At3g04780                                   |
| TCONS_00011123 | 0.369793 | 0.59224     | 0.282051   | BGIOSGA013723 | XP_015697123.1 queuine tRNA-ribosyltransferase subunit QTRTD1-like                        |
| TCONS_00030699 | 0.369836 | -0.191109   | -0.2154    | BGIOSGA032519 | XP_015693376.1.PREDICTED: uncharacterized protein LOC102704983                            |
| TCONS_00018159 | 0.369894 | -2.12516    | -0.435254  | BGIOSGA000856 | XP_006649489.1 solute carrier family 25 member 44                                         |
| TCONS_00009412 | 0.369897 | -0.223818   | -0.529746  | BGIOSGA008412 | XP_006656775.1 kinesin-like protein KCA2                                                  |
| TCONS_00021859 | 0.3699   | -0.358412   | -0.444818  | BGIOSGA021660 | XP_022683489.1 disease resistance protein RPM1                                            |
| TCONS_00028004 | 0.370043 | 0.436933    | 0.724833   | BGIOSGA026983 |                                                                                           |

## transcriptome

|                |          |            |            |               |                                                                                                          |
|----------------|----------|------------|------------|---------------|----------------------------------------------------------------------------------------------------------|
| TCONS_00031885 | 0.370077 | 0.33907    | 0.289564   | BGIOSGA011113 | XP_006661652.1 autophagy-related protein 9-like                                                          |
| TCONS_00011833 | 0.370387 | 0.948401   | -0.112516  | BGIOSGA013906 | XP_002468217.2protein DETOXIFICATION 48 XP_006646405.1 phosphatidyglycerophosphatase GEP4, mitochondrial |
| TCONS_00004556 | 0.370549 | 0.334163   | 0.615588   | BGIOSGA022661 | XP_006659792.1PREDICTED: uncharacterized protein LOC102703606, partial                                   |
| TCONS_00025853 | 0.370762 | 0.699656   | 0.457581   | BGIOSGA001680 | XP_004981678.1probable protein phosphatase 2C 34                                                         |
| TCONS_00024467 | 0.370823 | 0.308838   | 0.917759   | BGIOSGA019351 | XP_015697104.1 UPF0434 protein BRADO0313                                                                 |
| TCONS_00031197 | 0.371235 | 0.372885   | 1.08942    | BGIOSGA033017 | XP_003558973.1uncharacterized protein LOC100824638 isoform X1                                            |
| TCONS_00031479 | 0.371396 | -0.323032  | -1.00595   | BGIOSGA008355 | XP_006654732.1 farnesyl pyrophosphate synthase-like                                                      |
| TCONS_00019723 | 0.371416 | -1.7519    | -0.921107  | BGIOSGA037227 | XP_012700848.1putative wall-associated receptor kinase-like 16                                           |
| TCONS_00021695 | 0.371661 | -0.442052  | 0.725974   | BGIOSGA006959 | XP_006661329.2 serine/threonine-protein kinase PEPKR2                                                    |
| TCONS_00030188 | 0.371706 | 0.134398   | -0.0327408 | BGIOSGA004651 | XP_010228353.1protein UXT homolog                                                                        |
| TCONS_00024029 | 0.372246 | -0.531032  | 0.464345   | BGIOSGA026068 | XP_004985894.1uncharacterized protein LOC101767597                                                       |
| TCONS_00009229 | 0.372347 | -0.57453   | -0.448766  | BGIOSGA007676 |                                                                                                          |
| TCONS_00033338 | 0.372467 | -0.585725  | -1.03354   | BGIOSGA021587 | XP_015697638.1 cycloeculenol cycloisomerase XP_006654254.1 putative zinc transporter                     |
| TCONS_00019047 | 0.372549 | 0.11065    | 0.526084   | BGIOSGA018313 | At3g08650                                                                                                |
| TCONS_00007299 | 0.372727 | 0.143286   | -0.720416  | BGIOSGA023314 | XP_015689573.1 ocs element-binding factor 1-like                                                         |
| TCONS_00009815 | 0.372732 | 0.654528   | 1.05487    | BGIOSGA006416 | XP_015690810.1 DNA topoisomerase 6 subunit A3                                                            |
| TCONS_00014624 | 0.372808 | -0.0760038 | 0.456927   | BGIOSGA016780 | XP_015692197.1 psbQ-like protein 3, chloroplastic                                                        |
| TCONS_00015990 | 0.372877 | 0.24158    | -0.411523  | BGIOSGA024249 | XP_006652347.1 probable protein phosphatase 2C 41                                                        |
| TCONS_00007167 | 0.372937 | -0.647289  | 0.876919   | BGIOSGA009355 | XP_006649212.1 metal tolerance protein C2                                                                |
| TCONS_00028960 | 0.372991 | -0.176222  | 0.85338    | BGIOSGA030716 | XP_006661200.1 cleavage and polyadenylation specificity factor subunit 3-II                              |
| TCONS_00027624 | 0.373026 | 1.2264     | 0.944318   | BGIOSGA032931 | XP_004973039.1putative glucose-6-phosphate 1-epimerase                                                   |
| TCONS_00012013 | 0.373172 | 0.501356   | 0.639464   | BGIOSGA008351 | NP_001145994.1THO complex subunit 4                                                                      |
| TCONS_00008361 | 0.373332 | 0.310121   | 0.244073   | BGIOSGA028752 | XP_006647497.1 histone-lysine N-methyltransferase ASHR3-like                                             |
| TCONS_00004882 | 0.373632 | -1.21127   | -0.325535  | BGIOSGA000337 | XP_006645158.2PREDICTED: uncharacterized protein LOC102705963 isoform X2                                 |
| TCONS_00023987 | 0.37385  | -1.21909   | -0.482799  | BGIOSGA030130 | XP_015697304.1PREDICTED: uncharacterized protein LOC102708470                                            |
| TCONS_00033294 | 0.373939 | 1.38883    | 0.833161   | BGIOSGA001875 | XP_006410289.1uncharacterized protein LOC18026827                                                        |
| TCONS_00023346 | 0.373974 | -0.316005  | -0.342475  | BGIOSGA013794 | XP_006658392.1 protein phosphatase 2C 70-like                                                            |
| TCONS_00008862 | 0.374174 | 1.47646    | 0.293324   | BGIOSGA032685 | XP_004954029.1bZIP transcription factor 23                                                               |
| TCONS_00035314 | 0.374305 | -0.0859937 | -0.313232  | BGIOSGA001697 | XP_024319288.1putative disease resistance RPP13-like protein 3                                           |
| TCONS_00010119 | 0.374479 | -0.0132461 | 1.01885    | BGIOSGA022743 | XP_015689905.1PREDICTED: uncharacterized protein HI_0077, partial                                        |
| TCONS_00014852 | 0.37451  | -1.10605   | -2.79279   | BGIOSGA000550 | XP_006652729.1 S-norococlaurine synthase-like                                                            |
| TCONS_00004617 | 0.374757 | -0.959473  | -1.37208   | BGIOSGA033715 | XP_006644898.1PREDICTED: uncharacterized protein LOC102701395                                            |
| TCONS_00001807 | 0.375144 | -3.2871    | 0.332716   | BGIOSGA021597 | XP_006644693.2 kinesin-4-like                                                                            |
| TCONS_00034422 | 0.375205 | -1.2097    | -0.802292  | BGIOSGA007095 | XP_015697578.1 atherin-like                                                                              |
| TCONS_00037463 | 0.375277 | 0.157982   | 0.89957    | BGIOSGA000260 | XP_015698352.1PREDICTED: LOW QUALITY PROTEIN: uncharacterized protein LOC102704583, partial              |
| TCONS_00034382 | 0.375331 | -0.10502   | 0.284264   | BGIOSGA036555 | XP_022685187.1filament-like plant protein 6                                                              |
| TCONS_00017856 | 0.375365 | 0.552711   | 0.353526   | BGIOSGA000406 | XP_015693142.1PREDICTED: uncharacterized protein LOC102716412                                            |
| TCONS_00005691 | 0.375389 | -0.62497   | -0.895864  | BGIOSGA027900 | XP_015688520.1PREDICTED: uncharacterized protein LOC102709626                                            |
| TCONS_00030340 | 0.375472 | 0.436084   | 0.408718   | BGIOSGA012282 | XP_015696777.1 peroxisomal nicotinamide adenine dinucleotide carrier-like                                |
| TCONS_00025470 | 0.375624 | -0.257208  | -0.786096  | BGIOSGA023960 | XP_006657917.1 filament-A-interacting protein 1                                                          |
| TCONS_00006442 | 0.37576  | 0.465749   | 0.250201   | BGIOSGA016698 | XP_006647495.1 S-adenosylmethionine decarboxylase, proenzyme-like                                        |
| TCONS_00012018 | 0.375769 | 0.172815   | -0.706759  | BGIOSGA025323 | XP_015690783.1 ATP synthase subunit b', chloroplastic                                                    |
| TCONS_00009852 | 0.375868 | 0.811452   | -0.0377523 | BGIOSGA012402 | XP_015689856.1PREDICTED: LOW QUALITY PROTEIN: uncharacterized protein LOC102716306                       |
| TCONS_00009509 | 0.37593  | -0.954678  | 0.492911   | BGIOSGA005677 | XP_004985315.1ADP-ribosylation factor-like protein 8a                                                    |
| TCONS_00014974 | 0.375945 | -0.120963  | 0.654127   | BGIOSGA025165 | XP_006652849.1 peroxisomal (S)-2-hydroxy-acid oxidase GLO3                                               |
| TCONS_00028728 | 0.375972 | -0.452258  | -0.636242  | BGIOSGA040512 | XP_006660520.1 ocs element-binding factor 1-like                                                         |
| TCONS_00022679 | 0.376095 | 0.82665    | 0.177603   | BGIOSGA010489 | XP_012489481.1 protein transport protein Sec61 subunit gamma-like                                        |
| TCONS_00024787 | 0.376398 | -0.439231  | -0.922199  | BGIOSGA024582 | XP_015694571.1 uncharacterized aarF domain-containing protein kinase At5g05200, chloroplastic            |
| TCONS_00004729 | 0.376419 | 0.0815461  | 0.573179   | BGIOSGA000486 | XP_015694193.1PREDICTED: uncharacterized protein LOC102715912, partial                                   |
| TCONS_00009727 | 0.376775 | -0.387026  | -0.0220082 | BGIOSGA012276 | XP_004984700.1probable BOI-related E3 ubiquitin-protein ligase 2                                         |
| TCONS_00027049 | 0.376888 | 0.93411    | 0.124458   | BGIOSGA029101 | XP_006660346.1 la-related protein 6B-like                                                                |

transcriptome

| TCONS_ID       | Value 1  | Value 2    | Value 3    | Gene          | Description                                                                                    |
|----------------|----------|------------|------------|---------------|------------------------------------------------------------------------------------------------|
| TCONS_00002755 | 0.3771   | 0.897922   | 0.759463   | BGIOSGA000527 | XP_015699286.1 metal tolerance protein 7 isoform X1                                            |
| TCONS_00019676 | 0.377222 | 0.306265   | 1.08125    | BGIOSGA010774 | XP_006654693.1 SNF1-related protein kinase catalytic subunit alpha KIN10-like                  |
| TCONS_00007723 | 0.377509 | -0.0127471 | 0.675083   | BGIOSGA002048 | XP_006644252.1 40S ribosomal protein S15a-5-like                                               |
| TCONS_00023678 | 0.377524 | -0.627671  | 0.191906   | BGIOSGA025703 | XP_006658560.1 spindle and kinetochore-associated protein 1 homolog                            |
| TCONS_00024611 | 0.377545 | -1.33682   | -2.32646   | BGIOSGA014206 | XP_003561404.1 probable carboxylesterase 15                                                    |
| TCONS_00012099 | 0.377859 | 1.54846    | -0.198414  | BGIOSGA012477 | XP_015694032.1 wound-induced protein 1-like                                                    |
| TCONS_00025885 | 0.377921 | -0.186263  | 0.336299   | BGIOSGA014508 | XP_006659807.1 actin-related protein 4                                                         |
| TCONS_00027539 | 0.377988 | -0.635122  | -1.51218   | BGIOSGA013060 | XP_006650520.1 PREDICTED: uncharacterized protein LOC102721532                                 |
| TCONS_00031634 | 0.378234 | -0.561454  | 0.215672   | BGIOSGA007108 | XP_006662067.2 PREDICTED: uncharacterized protein LOC102712849                                 |
| TCONS_00037009 | 0.378448 | 1.11494    | 0.688051   | BGIOSGA036363 | XP_006664497.1 protein RETICULATA-RELATED 1, chloroplastic                                     |
| TCONS_00028839 | 0.378598 | -0.671772  | 0.409409   | BGIOSGA007771 | XP_021310476.1 ABC transporter A family member 7 isoform X3                                    |
| TCONS_00016458 | 0.378639 | -0.288043  | -0.740483  | BGIOSGA014513 | XP_006652677.1 uncharacterized metal-dependent hydrolase YcfH isoform X2                       |
| TCONS_00032945 | 0.378774 | 0.448303   | 0.527994   | BGIOSGA016783 | XP_006662727.1 two-component response regulator ORR9                                           |
| TCONS_00032142 | 0.378899 | 0.631104   | 0.914743   | BGIOSGA031996 | XP_006661739.2 translation initiation factor eIF-2B subunit beta                               |
| TCONS_00009187 | 0.378976 | -0.629505  | 0.18829    | BGIOSGA016943 | XP_006649269.1 RHOMBROID-like protein 2                                                        |
| TCONS_00016294 | 0.379    | 1.64348    | 1.18823    | BGIOSGA014676 | XP_008661938.1 hnuS1-like protein isoform X1                                                   |
| TCONS_00012555 | 0.379138 | -0.257465  | 1.26023    | BGIOSGA011563 | XP_004982553.1 tobamovirus multiplication protein 1                                            |
| TCONS_00029433 | 0.379174 | 0.0956138  | 0.709011   | BGIOSGA031182 | XP_022680422.1 nitrate regulatory gene2 protein                                                |
| TCONS_00028715 | 0.379512 | 0.197822   | -0.274374  | BGIOSGA008875 | XP_004956514.1 protein PHR1-LIKE 2 isoform X1                                                  |
| TCONS_00004164 | 0.379656 | 0.113146   | 0.352877   | BGIOSGA010730 | XP_015699224.1 tubby-like F-box protein 1                                                      |
| TCONS_00018286 | 0.37967  | 0.467923   | 0.140153   | BGIOSGA001022 | XP_004975378.160S ribosomal protein L37a-1                                                     |
| TCONS_00008837 | 0.38008  | -0.622843  | -0.357553  | BGIOSGA005579 | XP_006647940.1 peptidyl-prolyl cis-trans isomerase FKBP12                                      |
| TCONS_00004851 | 0.380172 | -0.705013  | -1.00732   | BGIOSGA037885 | NP_001278609.160S ribosomal protein L37                                                        |
| TCONS_00000450 | 0.380312 | -1.69883   | -1.67794   | BGIOSGA004417 | XP_006643925.1 aluminum-activated malate transporter 9-like                                    |
| TCONS_00017902 | 0.380585 | 0.0252268  | -0.415662  | BGIOSGA036996 | XP_021303686.1 protein BUD31 homolog 2                                                         |
| TCONS_00008244 | 0.380766 | 0.158831   | -0.0942775 | BGIOSGA006185 | XP_006647415.2 photosynthetic NDH subunit of luminal location 2, chloroplastic                 |
| TCONS_00027387 | 0.380906 | 2.0685     | 1.73809    | BGIOSGA025102 | XP_006659146.1 nucleolar GTP-binding protein 1                                                 |
| TCONS_00036038 | 0.380916 | 0.837606   | 1.85436    | BGIOSGA034839 | XP_006664024.1 cyclin-T1-4                                                                     |
| TCONS_00001733 | 0.381056 | -0.245678  | 0.761015   | BGIOSGA020215 | XP_015689773.1 hexokinase-9-like                                                               |
| TCONS_00006655 | 0.381109 | -0.573298  | -0.910109  | BGIOSGA033362 | XP_024318180.1 tobamovirus multiplication protein 3                                            |
| TCONS_00028100 | 0.381571 | -0.0571124 | 1.30135    | #N/A          | #N/A                                                                                           |
| TCONS_00020431 | 0.381725 | -4.80289   | -0.316022  | BGIOSGA005652 | XP_010227794.1TORTIFOLIA1-like protein 3                                                       |
| TCONS_00035441 | 0.381764 | -0.485748  | -0.374725  | BGIOSGA012069 | XP_015697977.1 macrophage migration inhibitory factor homolog isoform X1                       |
| TCONS_00027689 | 0.381905 | -0.851672  | -0.558017  | BGIOSGA036343 | XP_015695554.1 F-box protein SKIP1-like                                                        |
| TCONS_00027863 | 0.382031 | 0.449523   | 0.960495   | BGIOSGA030678 | XP_015696042.1 bifunctional aspartokinase/homoserine dehydrogenase 1, chloroplastic isoform X1 |
| TCONS_00023172 | 0.382126 | -0.0971218 | 0.405466   | BGIOSGA025213 | XP_006657480.1 glutamine-dependent NAD(+) synthetase                                           |
| TCONS_00001551 | 0.382304 | 0.525021   | 0.264314   | BGIOSGA017567 | XP_015699331.1 protein DEHYDRATION-INDUCED 19 homolog 3                                        |
| TCONS_00019451 | 0.382373 | 1.37817    | 1.00729    | BGIOSGA000540 | XP_012700237.1nuclear transcription factor Y subunit B                                         |
| TCONS_00023057 | 0.382476 | -2.35784   | -5.26383   | BGIOSGA036164 | XP_006657422.1 pathogenesis-related protein 1-like                                             |
| TCONS_00005915 | 0.382639 | 0.548857   | 1.298      | BGIOSGA000814 | XP_006647204.1 OPA3-like protein                                                               |
| TCONS_00022914 | 0.382692 | 2.0754     | 0.51229    | BGIOSGA026730 | XP_006657350.1 endoplasmin homolog                                                             |
| TCONS_00015577 | 0.38272  | -1.9623    | -2.52391   | BGIOSGA031696 | XP_015691398.1 transcription factor bHLH35-like                                                |
| TCONS_00011693 | 0.38272  | 0.35963    | -0.938944  | BGIOSGA032820 | XP_015690955.1 protein CutA 1, chloroplastic-like isoform X2                                   |
| TCONS_00009978 | 0.382755 | 0.571367   | 0.987924   | BGIOSGA001902 | XP_006650013.1 mitochondrial import receptor subunit TOM40-1-like                              |
| TCONS_00005810 | 0.382859 | 0.291612   | 0.0662072  | BGIOSGA007931 | XP_006647140.2 pentatricopeptide repeat-containing protein At3g16010                           |
| TCONS_00006536 | 0.382889 | 0.464145   | 0.411683   | BGIOSGA022733 | XP_004953271.1auxin-responsive protein SAUR36                                                  |
| TCONS_00002162 | 0.383003 | -1.85731   | -0.837439  | BGIOSGA017926 | XP_015690384.1 ultraviolet-B receptor UVR8                                                     |
| TCONS_00024631 | 0.383179 | 0.155918   | 0.0299315  | BGIOSGA026295 | XP_006657481.1 BTB/POZ and MATH domain-containing protein 4                                    |
| TCONS_00029994 | 0.383454 | -0.123615  | -0.475811  | BGIOSGA009908 | XP_015696821.1 coffeoylshikimate esterase-like isoform X2                                      |
| TCONS_00035827 | 0.383494 | 0.75633    | 0.867145   | BGIOSGA034483 | XP_006664468.1 pre-mRNA-splicing factor CWC22 homolog                                          |
| TCONS_00031671 | 0.383523 | -0.6805    | -0.865361  | BGIOSGA033489 | XP_006662622.1 uncharacterized sugar kinase str0537                                            |
| TCONS_00001575 | 0.38353  | 1.83205    | 2.81707    | BGIOSGA008934 | XP_006644523.2 transcription initiation factor TFIID subunit 11                                |
| TCONS_00016351 | 0.383561 | 0.195948   | 0.901015   | BGIOSGA017330 | XP_006653633.2 PREDICTED: uncharacterized protein LOC102721360                                 |
| TCONS_00022729 | 0.38377  | 0.110511   | 0.104632   | BGIOSGA005526 | XP_006656347.1 haloacid dehalogenase-like hydrolase domain-containing protein 3                |
| TCONS_00012717 | 0.383847 | 0.710729   | 0.56685    | BGIOSGA030118 | XP_006651600.2 50S ribosomal protein L25                                                       |
| TCONS_00009877 | 0.383943 | 0.537317   | 0.359834   | BGIOSGA033025 | XP_006649937.1 26S protease regulatory subunit 4 homolog                                       |

## transcriptome

|                |          |             |           |               |                                                                                     |
|----------------|----------|-------------|-----------|---------------|-------------------------------------------------------------------------------------|
| TCONS_00023485 | 0.38404  | 0.544705    | 0.635208  | BGIOSGA024764 | XP_006657613.2 putative aldehyde oxidase-like protein                               |
| TCONS_00029932 | 0.384059 | -0.00693014 | 0.869413  | BGIOSGA030347 | XP_010238122.1serine/threonine-protein kinase 16 isoform X1                         |
| TCONS_00006515 | 0.3841   | -0.0190648  | 0.271894  | BGIOSGA008682 | XP_002452499.1E2F-associated phosphoprotein                                         |
| TCONS_00012475 | 0.384193 | -0.459569   | 0.287997  | BGIOSGA010504 | XP_015689037.1 UDP-N-acetylglucosamine transferase subunit ALG14                    |
| TCONS_00017658 | 0.384257 | 0.597634    | -0.107852 | BGIOSGA014723 | XP_006654314.1 beta-glucosidase 22-like                                             |
| TCONS_00036645 | 0.384708 | 1.13686     | 0.465468  | BGIOSGA036663 | XP_006664974.1 probable calcium-binding protein CML49                               |
| TCONS_00011007 | 0.38522  | -0.238638   | 0.489729  | BGIOSGA026231 | XP_006650635.2 peroxidase 51-like                                                   |
| TCONS_00035479 | 0.385747 | -0.251179   | 0.179781  | BGIOSGA029663 | XP_006663754.1 cytochrome P450 714C3                                                |
| TCONS_00013060 | 0.385764 | 0.239733    | 0.491222  | BGIOSGA009923 | XP_002463995.1NADH dehydrogenase [ubiquinone] iron-sulfur protein 1, mitochondrial  |
| TCONS_00034183 | 0.385876 | 0.085629    | 0.825132  | BGIOSGA036749 | XP_006663163.2PREDICTED: uncharacterized protein LOC102714866                       |
| TCONS_00011153 | 0.38597  | 1.6071      | 1.04103   | BGIOSGA009545 | XP_004981386.1AAA-ATPase ASD, mitochondrial                                         |
| TCONS_00019159 | 0.386079 | -0.0884614  | -0.015042 | BGIOSGA002565 | XP_020394134.1uncharacterized protein LOC100279052                                  |
| TCONS_00031488 | 0.386115 | 0.311681    | 1.00212   | BGIOSGA033301 | XP_006662527.1 flavonol synthase/flavonone 3-hydroxylase-like                       |
| TCONS_00007806 | 0.386193 | 0.167986    | 0.811426  | BGIOSGA012058 | XP_021307558.140S ribosomal protein S3a-like                                        |
| TCONS_00018370 | 0.386283 | 0.448009    | 0.59677   | BGIOSGA020421 | XP_015692791.1 peroxisomal membrane protein PEX14-like                              |
| TCONS_00023865 | 0.386405 | -1.60585    | -0.111    | BGIOSGA013744 | NP_001311123.1oxygen-evolving enhancer protein 3-1, chloroplastic                   |
| TCONS_00005781 | 0.386418 | 1.01793     | 1.21088   | BGIOSGA002990 | XP_015689451.1 transcription factor GTE4-like isoform X2                            |
| TCONS_00012068 | 0.386452 | 0.624686    | 0.15385   | BGIOSGA010940 | XP_006649912.1 ran-binding protein 1 homolog a-like                                 |
| TCONS_00033896 | 0.386639 | 0.290431    | 0.25005   | BGIOSGA009740 | XP_019704954.1 40S ribosomal protein S29                                            |
| TCONS_00012417 | 0.386657 | 0.549878    | 1.31982   | BGIOSGA016276 | XP_006650175.1PREDICTED: uncharacterized protein LOC102715926                       |
| TCONS_00022447 | 0.386757 | 0.296272    | 0.780763  | BGIOSGA004310 | XP_006656174.1 V-type proton ATPase subunit B 1                                     |
| TCONS_00006759 | 0.386896 | 1.70722     | 0.702265  | BGIOSGA008929 | XP_003570252.1uncharacterized protein LOC100840317                                  |
| TCONS_00025656 | 0.387233 | 1.2393      | 0.737888  | BGIOSGA023767 | XP_006658926.1 DDT domain-containing protein PTM                                    |
| TCONS_00012314 | 0.387259 | -0.195384   | 0.852073  | BGIOSGA010682 | XP_006650108.2PREDICTED: uncharacterized protein LOC102719468 isoform X1            |
| TCONS_00036244 | 0.387574 | -0.471441   | 0.332923  | BGIOSGA025511 | XP_006664107.1 psbP domain-containing protein 1, chloroplastic                      |
| TCONS_00030453 | 0.3876   | 1.2487      | -0.325377 | BGIOSGA029347 | XP_006661489.2 trafficking protein particle complex subunit 2-like protein          |
| TCONS_00031253 | 0.387744 | 0.876094    | 0.927488  | BGIOSGA031079 | XP_003573997.1uncharacterized protein LOC100821421                                  |
| TCONS_00030126 | 0.387751 | 0.535781    | 0.483449  | BGIOSGA014013 | XP_006661281.2 probable receptor-like protein kinase At5g56460                      |
| TCONS_00003784 | 0.3879   | -0.400947   | 0.629344  | BGIOSGA001427 | NP_001136640.1putative dynein light chain type 1 family protein                     |
| TCONS_00025175 | 0.387922 | 1.37714     | -2.12832  | BGIOSGA033880 | NP_001105805.2adenosine 5'-phosphosulfate reductase-like 2                          |
| TCONS_00012996 | 0.387929 | 1.28907     | 1.45747   | BGIOSGA013731 | XP_006651721.1 putative ABC1 protein At2g40090                                      |
| TCONS_00021919 | 0.388819 | -0.402103   | 0.211994  | BGIOSGA009038 | XP_006656813.1 NEP1-interacting protein-like 2 isoform X2                           |
| TCONS_00011579 | 0.388884 | 0.482339    | 1.59034   | BGIOSGA011436 | XP_015690900.1 probable acetyltransferase NATA1-like                                |
| TCONS_00010367 | 0.389132 | 0.923091    | 0.445259  | BGIOSGA020331 | XP_006650233.1 somatic embryogenesis receptor kinase 2-like                         |
| TCONS_00018122 | 0.389331 | 1.11902     | 0.162031  | BGIOSGA008253 | XP_015693271.1 probable magnesium transporter NIPA3 isoform X2                      |
| TCONS_00026643 | 0.389479 | 0.581109    | 0.847152  | BGIOSGA030697 | XP_010235145.1probable ubiquitin receptor RAD23 isoform X1                          |
| TCONS_00005930 | 0.389523 | -0.468492   | -0.373957 | BGIOSGA017912 | XP_006647222.1 coatomer subunit zeta-2                                              |
| TCONS_00016098 | 0.38968  | -0.452735   | 0.303596  | BGIOSGA006132 | XP_004975964.1beta-1,4-mannosyl-glycoprotein 4-beta-N-acetylglucosaminyltransferase |
| TCONS_00034010 | 0.38994  | 0.676766    | -0.910545 | BGIOSGA011893 | XP_014758377.1cell number regulator 13                                              |
| TCONS_00006855 | 0.390007 | 0.271174    | 0.371954  | BGIOSGA031387 | XP_006647876.1 RING-H2 finger protein ATL46-like                                    |
| TCONS_00030433 | 0.390212 | -1.30559    | -0.28732  | BGIOSGA000096 | XP_006660892.1PREDICTED: uncharacterized protein LOC102700085                       |
| TCONS_00024268 | 0.390422 | -0.876784   | -0.347076 | BGIOSGA026312 | XP_006658059.2 XIAP-associated factor 1-like                                        |
| TCONS_00016000 | 0.390469 | 0.599932    | 0.121371  | BGIOSGA010841 | XP_006652356.1 endoplasmic reticulum-Golgi intermediate compartment protein 3-like  |
| TCONS_00029304 | 0.390605 | 0.0616824   | 0.444921  | BGIOSGA031047 | XP_006660812.1 ribulose-phosphate 3-epimerase, cytoplasmic isoform                  |
| TCONS_00015828 | 0.390624 | -0.762488   | -0.486819 | BGIOSGA015158 | XP_015692103.1 probable protein phosphatase 2C 39                                   |
| TCONS_00018265 | 0.390665 | -0.0266673  | 0.337374  | BGIOSGA020320 | XP_021909473.1 zinc finger protein BRUTUS-like                                      |
| TCONS_00030146 | 0.390701 | -4.59251    | -0.892516 | BGIOSGA029656 | XP_006660676.1 65-kDa microtubule-associated protein 6-like                         |
| TCONS_00013030 | 0.390712 | -0.00383688 | 0.349686  | BGIOSGA030742 | NP_001149034.1protein binding protein                                               |
| TCONS_00009174 | 0.390723 | 0.887132    | 0.558984  | BGIOSGA033284 | XP_004982595.1protein HLB1                                                          |
| TCONS_00019675 | 0.391054 | 0.459998    | 0.412744  | BGIOSGA004390 | NP_001144109.1uncharacterized protein LOC100276949                                  |
| TCONS_00026642 | 0.391129 | 0.0298079   | 0.215482  | BGIOSGA028710 | XP_006659420.1 protein FLX-like 3                                                   |
| TCONS_00032834 | 0.391146 | 1.4263      | 0.558412  | BGIOSGA019707 | XP_006664864.2PREDICTED: uncharacterized protein LOC102701411                       |

## transcriptome

|                |          |            |            |               |                                                                                                       |
|----------------|----------|------------|------------|---------------|-------------------------------------------------------------------------------------------------------|
| TCONS_00001535 | 0.391377 | -0.329561  | -2.25749   | BGIOSGA004168 | XP_006644485.1 PREDICTED: uncharacterized protein LOC102720836                                        |
| TCONS_00035736 | 0.3914   | 0.133394   | 0.593601   | BGIOSGA037145 | XP_006663906.1 PREDICTED: uncharacterized protein LOC102706056                                        |
| TCONS_00035528 | 0.391547 | -0.405553  | -0.242288  | BGIOSGA034745 | XP_006662718.1 L-amino acid phosphate-semialdehyde dehydrogenase-phosphopantetheinyl transferase-like |
| TCONS_00005005 | 0.391598 | -1.56369   | -0.832777  | BGIOSGA023942 | XP_004971136.1 probable glucuronosyltransferase Os01g0926400                                          |
| TCONS_00032078 | 0.391644 | 0.539167   | 0.77571    | BGIOSGA001915 | XP_006661720.1 glutamate-tRNA ligase, cytoplasmic-like                                                |
| TCONS_00005546 | 0.391781 | -0.903009  | -0.901637  | BGIOSGA023993 | XP_006646961.1 probable 4-coumarate--CoA ligase 3                                                     |
| TCONS_00025174 | 0.391818 | 1.43986    | -0.489402  | BGIOSGA012454 | NP_001147200.1 peptidase S16, lon                                                                     |
| TCONS_00037418 | 0.391887 | 0.545946   | 0.155688   | BGIOSGA017205 | XP_015698713.1 probable galacturonosyltransferase 13                                                  |
| TCONS_00019369 | 0.391946 | 1.61284    | -0.962023  | BGIOSGA017824 | XP_010025545.1 histone H3.2                                                                           |
| TCONS_00005141 | 0.392149 | 0.190823   | -0.259708  | BGIOSGA000062 | XP_006645355.1 ubiquitin-fold modifier 1                                                              |
| TCONS_00005406 | 0.392232 | 1.00494    | 0.360419   | BGIOSGA019170 | XP_006646874.1 sucrose-phosphatase 2                                                                  |
| TCONS_00004101 | 0.392463 | 0.140606   | -0.507441  | BGIOSGA001037 | XP_008672795.1 uncharacterized LOC100280571 isoform X1                                                |
| TCONS_00027037 | 0.392806 | 0.0623419  | 0.543072   | BGIOSGA018109 | XP_006660342.1 probable RNA methyltransferase At5g51130                                               |
| TCONS_00036208 | 0.393133 | -0.462989  | 0.501265   | BGIOSGA037484 | XP_009629077.1 splicing regulatory glutamine/lysine-rich protein 1 isoform X1                         |
| TCONS_00029909 | 0.3936   | -0.855227  | -1.15832   | BGIOSGA014631 | XP_006660573.1 putative disease resistance protein RGA3                                               |
| TCONS_00019542 | 0.393789 | 0.603219   | 0.734635   | BGIOSGA004666 | XP_012485277.1 proteasome subunit alpha type-3 isoform X2                                             |
| TCONS_00011032 | 0.393892 | 0.357846   | -0.385997  | BGIOSGA037725 | XP_015691165.1 BTB/POZ domain-containing protein At3g50780-like                                       |
| TCONS_00022161 | 0.39394  | 0.085329   | 0.375344   | BGIOSGA021337 | XP_015693562.1 UPF0061 protein AZOSEA38000                                                            |
| TCONS_00008603 | 0.393953 | 1.05645    | 1.02975    | BGIOSGA005823 | XP_017188122.1 UPF0160 protein-like                                                                   |
| TCONS_00027487 | 0.393955 | -0.0966006 | -0.173618  | BGIOSGA027522 | XP_004972671.1 cysteine-rich PDZ-binding protein                                                      |
| TCONS_00023116 | 0.394005 | -3.70133   | 0.258602   | BGIOSGA025154 | XP_006657444.1 187-kDa microtubule-associated protein AIR9                                            |
| TCONS_00000113 | 0.394011 | 1.67617    | 0.995239   | BGIOSGA002683 | XP_015699325.1 66 kDa stress protein                                                                  |
| TCONS_00007829 | 0.39405  | 1.09013    | 0.613322   | BGIOSGA008309 | XP_006647188.1 protein PAT1 homolog 1-like                                                            |
| TCONS_00024654 | 0.394165 | -0.0218319 | 0.142629   | BGIOSGA024734 | XP_015694810.1 putative nuclease HARBI1                                                               |
| TCONS_00011948 | 0.394271 | 0.240494   | 0.291538   | BGIOSGA011064 | XP_006649787.1 eukaryotic translation initiation factor NCBP                                          |
| TCONS_00005539 | 0.394369 | 0.764599   | 1.14892    | BGIOSGA020743 | XP_015688959.1 basic leucine zipper 9-like isoform X1                                                 |
| TCONS_00026006 | 0.39459  | 1.61809    | 1.09808    | BGIOSGA029358 | XP_003573418.1 CRS2-associated factor 1, mitochondrial                                                |
| TCONS_00009001 | 0.394634 | 0.994586   | 0.183184   | BGIOSGA005406 | XP_015689592.1 PREDICTED: uncharacterized protein LOC102711234                                        |
| TCONS_00014111 | 0.394691 | 0.133133   | 0.955646   | BGIOSGA008281 | XP_015691424.1 PREDICTED: uncharacterized protein LOC102715299                                        |
| TCONS_00014845 | 0.394758 | 0.677046   | -0.289095  | BGIOSGA017022 | XP_003580216.1 succinate dehydrogenase subunit 7, mitochondrial                                       |
| TCONS_00036145 | 0.394849 | 1.03959    | 0.87504    | BGIOSGA034413 | XP_010228950.1 uncharacterized protein LOC100821645                                                   |
| TCONS_00039931 | 0.395041 | -0.525434  | 0.228204   | BGIOSGA030524 | XP_015696539.1 disease resistance protein RGA2-like                                                   |
| TCONS_00002766 | 0.395103 | -1.3906    | 0.383624   | BGIOSGA026793 | XP_021310925.1 mediator of RNA polymerase II transcription subunit 22a                                |
| TCONS_00014253 | 0.395187 | -3.11058   | -0.903403  | BGIOSGA019333 | XP_015691455.1 FAD-dependent urate hydroxylase-like                                                   |
| TCONS_00029027 | 0.395376 | 0.0591077  | 0.458702   | BGIOSGA021591 | XP_006661247.1 probable folate-biopterin transporter 6                                                |
| TCONS_00032551 | 0.395585 | 0.136847   | 0.19515    | BGIOSGA006748 | XP_015696913.1 cytochrome P450 84A1                                                                   |
| TCONS_00014867 | 0.395609 | -0.220331  | 0.365164   | BGIOSGA020224 | XP_015692257.1 wall-associated receptor kinase 1-like                                                 |
| TCONS_00004458 | 0.395713 | -0.376406  | 0.302716   | BGIOSGA000763 | XP_006644758.1 glutamate 5-kinase isoform X1                                                          |
| TCONS_00023483 | 0.395745 | 0.842915   | 0.680182   | BGIOSGA013564 | XP_006665056.2 4-coumarate--CoA ligase-like 7                                                         |
| TCONS_00033029 | 0.395898 | -0.778044  | -0.323491  | BGIOSGA034870 | XP_010237909.1 cytochrome b-c1 complex subunit 6                                                      |
| TCONS_00035544 | 0.395903 | 0.111823   | 0.254514   | BGIOSGA035053 | XP_006663187.1 PP2A regulatory subunit TAP46-like                                                     |
| TCONS_00030170 | 0.395951 | 1.04778    | 0.337375   | BGIOSGA026820 | XP_015696379.1 probable BRI1 kinase inhibitor 1                                                       |
| TCONS_00031098 | 0.396704 | 0.93135    | -0.0795419 | BGIOSGA032916 | XP_015697107.1 chitinase 2-like                                                                       |
| TCONS_00011226 | 0.396816 | 0.650986   | 0.415643   | BGIOSGA013827 | XP_006650799.1 leukotriene A-4 hydrolase homolog                                                      |
| TCONS_00030455 | 0.397091 | 0.0931362  | 0.0445561  | BGIOSGA028543 | XP_006660915.2 probable 26S proteasome non-ATPase regulatory subunit 3                                |
| TCONS_00017444 | 0.397134 | -0.584777  | -1.15419   | BGIOSGA040651 | XP_006653251.1 type 1 phosphatases regulator YPI1                                                     |
| TCONS_00036823 | 0.397236 | 0.587288   | 0.166833   | BGIOSGA013351 | XP_006663896.1 mRNA-capping enzyme-like                                                               |
| TCONS_00012324 | 0.397555 | 0.481099   | 1.34569    | BGIOSGA010670 | XP_015690977.1 CST complex subunit STN1                                                               |
| TCONS_00019108 | 0.39785  | 0.690498   | 0.935964   | BGIOSGA018253 | XP_015693218.1 dehydration-responsive element-binding protein 2B-like isoform X4                      |
| TCONS_00029755 | 0.397975 | -0.0856892 | 1.0652     | BGIOSGA020411 | XP_006647104.2 ycf20-like protein                                                                     |
| TCONS_00036653 | 0.398082 | 0.506443   | 0.0195156  | BGIOSGA012020 | XP_010238743.1L-galactono-1,4-lactone dehydrogenase 2, mitochondrial                                  |
| TCONS_00000033 | 0.398174 | -0.272654  | -0.312302  | BGIOSGA027211 | XP_006645429.1 protein RER1A-like                                                                     |
| TCONS_00021013 | 0.398588 | 0.787017   | 0.230105   | BGIOSGA036735 | XP_006656230.1 vacuolar protein sorting-associated protein 32 homolog 2                               |
| TCONS_00027116 | 0.398592 | 0.402899   | 1.00636    | BGIOSGA029160 | XP_015696061.1 WD repeat-containing protein DWA2                                                      |
| TCONS_00000222 | 0.398618 | -2.82572   | -0.84145   | BGIOSGA005340 | XP_014660807.1 glutathione hydrolase 3                                                                |

## transcriptome

|                |          |             |            |               |                                                                                                                                                                                                                                                                                                                                                                                                                                                                                                                                                                                                                                                                                                                                                                                                                                                                                                                                                                         |
|----------------|----------|-------------|------------|---------------|-------------------------------------------------------------------------------------------------------------------------------------------------------------------------------------------------------------------------------------------------------------------------------------------------------------------------------------------------------------------------------------------------------------------------------------------------------------------------------------------------------------------------------------------------------------------------------------------------------------------------------------------------------------------------------------------------------------------------------------------------------------------------------------------------------------------------------------------------------------------------------------------------------------------------------------------------------------------------|
| TCONS_00007061 | 0.398824 | 0.579028    | 0.349435   | BGIOSGA002075 | XP_006648080.1 long chain base biosynthesis protein 1c                                                                                                                                                                                                                                                                                                                                                                                                                                                                                                                                                                                                                                                                                                                                                                                                                                                                                                                  |
| TCONS_00011563 | 0.398864 | 0.796511    | 1.37667    | BGIOSGA033054 | XP_015688185.1 methyltransferase-like protein 1<br>XP_004958119.1 probable homogentisate                                                                                                                                                                                                                                                                                                                                                                                                                                                                                                                                                                                                                                                                                                                                                                                                                                                                                |
| TCONS_00023966 | 0.398932 | 0.856647    | -0.710686  | BGIOSGA025997 | phytyltransferase 2, chloroplastic                                                                                                                                                                                                                                                                                                                                                                                                                                                                                                                                                                                                                                                                                                                                                                                                                                                                                                                                      |
| TCONS_00035016 | 0.399031 | -1.84919    | -0.348361  | BGIOSGA033839 | XP_015692222.1 protein MRG1-like isoform X1<br>XP_006662718.1 L-aminoadipate-semialdehyde dehydrogenase-phosphopantetheinyl transferase-like                                                                                                                                                                                                                                                                                                                                                                                                                                                                                                                                                                                                                                                                                                                                                                                                                            |
| TCONS_00032913 | 0.39922  | -1.46445    | -1.06017   | BGIOSGA034745 |                                                                                                                                                                                                                                                                                                                                                                                                                                                                                                                                                                                                                                                                                                                                                                                                                                                                                                                                                                         |
| TCONS_00002488 | 0.399514 | 0.0432846   | 0.872835   | BGIOSGA029376 | XP_006645302.1 RNA-binding protein BRN1-like                                                                                                                                                                                                                                                                                                                                                                                                                                                                                                                                                                                                                                                                                                                                                                                                                                                                                                                            |
| TCONS_00017994 | 0.39958  | 1.52404     | 2.0131     | BGIOSGA007951 | XP_006655406.1 TOM1-like protein 2<br>XP_004976560.1 putative FBD-associated F-box protein At1g61330<br>XP_006648915.1 PREDICTED: uncharacterized protein LOC102710954<br>XP_006644515.1 30S ribosomal protein S20, chloroplastic<br>XP_006658799.1 peroxisome biogenesis factor 10                                                                                                                                                                                                                                                                                                                                                                                                                                                                                                                                                                                                                                                                                     |
| TCONS_00019702 | 0.399668 | -0.487424   | -0.256829  | BGIOSGA006536 |                                                                                                                                                                                                                                                                                                                                                                                                                                                                                                                                                                                                                                                                                                                                                                                                                                                                                                                                                                         |
| TCONS_00008544 | 0.399699 | -0.626055   | -0.0629891 | BGIOSGA014563 |                                                                                                                                                                                                                                                                                                                                                                                                                                                                                                                                                                                                                                                                                                                                                                                                                                                                                                                                                                         |
| TCONS_00001569 | 0.399938 | 0.429904    | 0.428736   | BGIOSGA002722 |                                                                                                                                                                                                                                                                                                                                                                                                                                                                                                                                                                                                                                                                                                                                                                                                                                                                                                                                                                         |
| TCONS_00024075 | 0.399951 | 0.731028    | 0.30724    | BGIOSGA026109 |                                                                                                                                                                                                                                                                                                                                                                                                                                                                                                                                                                                                                                                                                                                                                                                                                                                                                                                                                                         |
| TCONS_00023577 | 0.400228 | 0.0279095   | 0.052623   | BGIOSGA005373 | XP_015695298.1 protein PHR1-LIKE 1-like                                                                                                                                                                                                                                                                                                                                                                                                                                                                                                                                                                                                                                                                                                                                                                                                                                                                                                                                 |
| TCONS_00034412 | 0.400323 | -2.98159    | 0.431772   | BGIOSGA034396 | XP_003577776.1 dirigent protein 21<br>XP_004961845.1 ubiquitin-conjugating enzyme E2 7<br>XP_015693867.1 protein cornichon homolog 4                                                                                                                                                                                                                                                                                                                                                                                                                                                                                                                                                                                                                                                                                                                                                                                                                                    |
| TCONS_00017943 | 0.400624 | 0.222516    | 0.45686    | BGIOSGA000519 |                                                                                                                                                                                                                                                                                                                                                                                                                                                                                                                                                                                                                                                                                                                                                                                                                                                                                                                                                                         |
| TCONS_00020072 | 0.400679 | 0.498607    | -0.205118  | BGIOSGA022253 |                                                                                                                                                                                                                                                                                                                                                                                                                                                                                                                                                                                                                                                                                                                                                                                                                                                                                                                                                                         |
| TCONS_00015439 | 0.400679 | -1.08636    | 0.701773   | #N/A          | #N/A                                                                                                                                                                                                                                                                                                                                                                                                                                                                                                                                                                                                                                                                                                                                                                                                                                                                                                                                                                    |
| TCONS_00019710 | 0.400715 | -0.00690173 | -0.189424  | BGIOSGA013884 | XP_006655537.1 flap endonuclease 1-A                                                                                                                                                                                                                                                                                                                                                                                                                                                                                                                                                                                                                                                                                                                                                                                                                                                                                                                                    |
| TCONS_00033380 | 0.400975 | 0.850795    | 0.775138   | BGIOSGA032985 | XP_006663404.1 signal peptide peptidase-like 2                                                                                                                                                                                                                                                                                                                                                                                                                                                                                                                                                                                                                                                                                                                                                                                                                                                                                                                          |
| TCONS_00002908 | 0.400977 | -0.364569   | -0.661558  | BGIOSGA018735 | XP_006643796.1 protein NETWORKED 4B-like<br>NP_001141382.1 uncharacterized<br>LOC100273473                                                                                                                                                                                                                                                                                                                                                                                                                                                                                                                                                                                                                                                                                                                                                                                                                                                                              |
| TCONS_00024931 | 0.401187 | #N/A        | 0.889017   | BGIOSGA036106 | XP_003578514.1 triosephosphate isomerase, chloroplastic<br>XP_024042344.1 protein DETOXIFICATION 24 isoform X2<br>XP_006656312.1 probable protein phosphatase 2C 58<br>XP_006650231.1 PREDICTED: uncharacterized protein LOC102707568<br>XP_006650578.1 PREDICTED: uncharacterized protein LOC102716107<br>NP_001150644.1 zinc finger, C2H2 type family protein<br>XP_006652451.1 PREDICTED: uncharacterized protein LOC102711251<br>XP_006653953.1 E3 ubiquitin-protein ligase HERC2-like<br>XP_006659522.1 E3 ubiquitin-protein ligase CIP8-like<br>XP_006656458.1 PREDICTED: uncharacterized protein LOC102711269<br>XP_006659580.1 aminoacylase-1                                                                                                                                                                                                                                                                                                                   |
| TCONS_00030431 | 0.401322 | -0.201712   | -0.141339  | BGIOSGA004775 |                                                                                                                                                                                                                                                                                                                                                                                                                                                                                                                                                                                                                                                                                                                                                                                                                                                                                                                                                                         |
| TCONS_00036600 | 0.401592 | -0.87412    | -1.11749   | BGIOSGA030934 |                                                                                                                                                                                                                                                                                                                                                                                                                                                                                                                                                                                                                                                                                                                                                                                                                                                                                                                                                                         |
| TCONS_00022672 | 0.401701 | -0.205274   | 0.299219   | BGIOSGA015572 |                                                                                                                                                                                                                                                                                                                                                                                                                                                                                                                                                                                                                                                                                                                                                                                                                                                                                                                                                                         |
| TCONS_00010369 | 0.401855 | -0.661517   | 0.235257   | BGIOSGA009769 |                                                                                                                                                                                                                                                                                                                                                                                                                                                                                                                                                                                                                                                                                                                                                                                                                                                                                                                                                                         |
| TCONS_00010950 | 0.401982 | 1.07102     | 0.991656   | BGIOSGA025231 |                                                                                                                                                                                                                                                                                                                                                                                                                                                                                                                                                                                                                                                                                                                                                                                                                                                                                                                                                                         |
| TCONS_00020188 | 0.402026 | 1.90125     | 1.25478    | BGIOSGA006940 |                                                                                                                                                                                                                                                                                                                                                                                                                                                                                                                                                                                                                                                                                                                                                                                                                                                                                                                                                                         |
| TCONS_00014504 | 0.402076 | 1.00109     | 0.136478   | BGIOSGA031085 |                                                                                                                                                                                                                                                                                                                                                                                                                                                                                                                                                                                                                                                                                                                                                                                                                                                                                                                                                                         |
| TCONS_00016969 | 0.402239 | -0.645626   | -0.58135   | BGIOSGA014051 |                                                                                                                                                                                                                                                                                                                                                                                                                                                                                                                                                                                                                                                                                                                                                                                                                                                                                                                                                                         |
| TCONS_00028217 | 0.40224  | 0.368419    | 1.08136    | BGIOSGA024846 |                                                                                                                                                                                                                                                                                                                                                                                                                                                                                                                                                                                                                                                                                                                                                                                                                                                                                                                                                                         |
| TCONS_00021339 | 0.402443 | 0.438737    | 0.832244   | BGIOSGA020114 |                                                                                                                                                                                                                                                                                                                                                                                                                                                                                                                                                                                                                                                                                                                                                                                                                                                                                                                                                                         |
| TCONS_00028291 | 0.402481 | 0.581554    | 0.454448   | BGIOSGA014557 |                                                                                                                                                                                                                                                                                                                                                                                                                                                                                                                                                                                                                                                                                                                                                                                                                                                                                                                                                                         |
| TCONS_00031436 | 0.402495 | 0.911161    | 1.52687    | BGIOSGA033251 | XP_006662500.1 methionine aminopeptidase 1A                                                                                                                                                                                                                                                                                                                                                                                                                                                                                                                                                                                                                                                                                                                                                                                                                                                                                                                             |
| TCONS_00005860 | 0.402874 | -0.0310582  | -0.402176  | #N/A          | #N/A                                                                                                                                                                                                                                                                                                                                                                                                                                                                                                                                                                                                                                                                                                                                                                                                                                                                                                                                                                    |
| TCONS_00007352 | 0.402953 | 1.45759     | 0.371002   | BGIOSGA023535 | XP_006646888.1 DEAD-box ATP-dependent RNA helicase 35A<br>XP_006654995.1 probable serine/threonine-protein phosphatase 2A regulatory subunit B" subunit TON2<br>XP_006662958.2 chromophore lyase CRL, chloroplastic                                                                                                                                                                                                                                                                                                                                                                                                                                                                                                                                                                                                                                                                                                                                                     |
| TCONS_00017137 | 0.403135 | 0.234053    | 1.05097    | BGIOSGA019183 |                                                                                                                                                                                                                                                                                                                                                                                                                                                                                                                                                                                                                                                                                                                                                                                                                                                                                                                                                                         |
| TCONS_00033570 | 0.403181 | -0.967865   | 0.49765    | BGIOSGA000127 |                                                                                                                                                                                                                                                                                                                                                                                                                                                                                                                                                                                                                                                                                                                                                                                                                                                                                                                                                                         |
| TCONS_00015236 | 0.403248 | -3.14263    | -1.02475   | BGIOSGA020098 | XP_008669737.2 cytochrome P450 93G1<br>XP_006652023.1 aspartokinase 1, chloroplastic isoform X2                                                                                                                                                                                                                                                                                                                                                                                                                                                                                                                                                                                                                                                                                                                                                                                                                                                                         |
| TCONS_00011338 | 0.403513 | -0.354376   | 0.473499   | BGIOSGA000207 |                                                                                                                                                                                                                                                                                                                                                                                                                                                                                                                                                                                                                                                                                                                                                                                                                                                                                                                                                                         |
| TCONS_00005392 | 0.403526 | 1.53805     | 1.42369    | #N/A          | #N/A                                                                                                                                                                                                                                                                                                                                                                                                                                                                                                                                                                                                                                                                                                                                                                                                                                                                                                                                                                    |
| TCONS_00008199 | 0.40361  | 0.413424    | -0.46682   | BGIOSGA035513 | XP_024317893.1 uncharacterized protein LOC100832974<br>XP_002439713.1 serine/arginine repetitive matrix protein 1 isoform X1<br>XP_015696707.1 putative 1-phosphatidylinositol-3-phosphate 5-kinase FAB1D<br>XP_015688591.1 probable sodium/metabolite cotransporter BASS3, chloroplastic<br>XP_015690745.1 PREDICTED: LOW QUALITY PROTEIN: uncharacterized protein LOC107303923<br>XP_006653508.2 pentatricopeptide repeat-containing protein At3g63370, chloroplastic<br>XP_006652715.1 protein SSUH2 homolog<br>XP_006648706.2 NDR1/HIN1-Like protein 3-like<br>XP_006647322.1 acetyl-coenzyme A synthetase, chloroplastic/glyoxysomal<br>XP_015688968.1 DNA-directed RNA polymerases IV and V subunit 4 isoform X2<br>XP_014754790.1 protein MITOFERRIN LIKE 1, chloroplastic<br>XP_006646509.1 magnesium transporter MRS2-E<br>XP_004972482.1 probable serine/threonine-protein kinase At1g54610<br>XP_006660866.1 PREDICTED: uncharacterized protein LOC102716623 |
| TCONS_00016062 | 0.404349 | 0.308234    | 0.393326   | BGIOSGA003921 |                                                                                                                                                                                                                                                                                                                                                                                                                                                                                                                                                                                                                                                                                                                                                                                                                                                                                                                                                                         |
| TCONS_00014837 | 0.404375 | 0.230864    | 1.07286    | BGIOSGA017010 |                                                                                                                                                                                                                                                                                                                                                                                                                                                                                                                                                                                                                                                                                                                                                                                                                                                                                                                                                                         |
| TCONS_00008137 | 0.404889 | -6.44666    | -1.57974   | BGIOSGA034464 |                                                                                                                                                                                                                                                                                                                                                                                                                                                                                                                                                                                                                                                                                                                                                                                                                                                                                                                                                                         |
| TCONS_00006176 | 0.40495  | -0.170034   | 0.355893   | BGIOSGA016334 |                                                                                                                                                                                                                                                                                                                                                                                                                                                                                                                                                                                                                                                                                                                                                                                                                                                                                                                                                                         |
| TCONS_00008722 | 0.405076 | 0.567126    | 1.27777    | BGIOSGA005711 |                                                                                                                                                                                                                                                                                                                                                                                                                                                                                                                                                                                                                                                                                                                                                                                                                                                                                                                                                                         |
| TCONS_00002598 | 0.405268 | 0.931419    | 0.854787   | BGIOSGA016503 |                                                                                                                                                                                                                                                                                                                                                                                                                                                                                                                                                                                                                                                                                                                                                                                                                                                                                                                                                                         |
| TCONS_00002241 | 0.405427 | 0.599437    | 0.535303   | BGIOSGA020774 |                                                                                                                                                                                                                                                                                                                                                                                                                                                                                                                                                                                                                                                                                                                                                                                                                                                                                                                                                                         |
| TCONS_00026423 | 0.405598 | 0.471308    | -1.58152   | BGIOSGA037134 |                                                                                                                                                                                                                                                                                                                                                                                                                                                                                                                                                                                                                                                                                                                                                                                                                                                                                                                                                                         |
| TCONS_00030399 | 0.405608 | -0.240026   | 0.798271   | BGIOSGA018327 |                                                                                                                                                                                                                                                                                                                                                                                                                                                                                                                                                                                                                                                                                                                                                                                                                                                                                                                                                                         |
| TCONS_00017169 | 0.405664 | 1.8151      | 0.52013    | BGIOSGA021571 | XP_006655011.1 dnaJ protein ERDJ3B                                                                                                                                                                                                                                                                                                                                                                                                                                                                                                                                                                                                                                                                                                                                                                                                                                                                                                                                      |

transcriptome

|                |          |              |            |               |                                                                                                 |
|----------------|----------|--------------|------------|---------------|-------------------------------------------------------------------------------------------------|
| TCONS_00000951 | 0.405778 | 0.0805557    | -0.0910582 | BGIOSGA026631 | XP_004968771.1bifunctional 3-dehydroquininate dehydratase/shikimate dehydrogenase, chloroplasic |
| TCONS_00014200 | 0.405813 | 0.0116044    | -0.997094  | BGIOSGA004836 | NP_001344779.1catalytic/ hydrolase                                                              |
| TCONS_00011738 | 0.406087 | -0.53591     | -0.0573048 | BGIOSGA005677 | XP_004985315.1ADP-ribosylation factor-like protein 8a                                           |
| TCONS_00010082 | 0.40619  | 0.653396     | 0.62112    | BGIOSGA023769 | XP_015690309.1 protein EARLY RESPONSIVE TO DEHYDRATION 15-like                                  |
| TCONS_00028095 | 0.406318 | 0.388225     | 0.74516    | BGIOSGA026898 | XP_015695622.1 dentin sialophosphoprotein-like                                                  |
| TCONS_00007696 | 0.406633 | -0.141852    | 0.375672   | BGIOSGA023051 | XP_006647119.1 T-complex protein 1 subunit gamma-like                                           |
| TCONS_00011920 | 0.406797 | -0.890107    | 0.585406   | BGIOSGA011092 | XP_006649758.1 probable mitochondrial import inner membrane translocase subunit TIM21           |
| TCONS_00001407 | 0.40689  | -0.429837    | -0.843659  | BGIOSGA001070 | XP_006644397.1 CTD small phosphatase-like protein 2 isoform X2                                  |
| TCONS_00001266 | 0.406978 | 1.67134      | 1.24427    | BGIOSGA037494 | XP_006646063.1PREDICTED: uncharacterized protein LOC102722356, partial                          |
| TCONS_00006409 | 0.407176 | -2.15613     | -0.735548  | BGIOSGA019572 | XP_015689145.1 protein phosphatase inhibitor 2-like                                             |
| TCONS_00010994 | 0.407424 | 0.676991     | 1.52221    | BGIOSGA022974 | XP_015690074.1PREDICTED: LOW QUALITY PROTEIN: uncharacterized protein LOC102720317              |
| TCONS_00013465 | 0.407518 | 0.112595     | 0.661766   | BGIOSGA013859 | XP_006650835.1 50S ribosomal protein L18, chloroplasic                                          |
| TCONS_00010340 | 0.407596 | -0.914815    | -0.305154  | BGIOSGA012916 | XP_015690362.1 membrane-anchored ubiquitin-fold protein 1                                       |
| TCONS_00016835 | 0.40773  | 0.740604     | 0.82918    | BGIOSGA014129 | XP_006652994.1 methylthioribose kinase 1                                                        |
| TCONS_00031532 | 0.407792 | -5.21329     | -1.00204   | BGIOSGA032833 | XP_021306961.1beta-carotene 3-hydroxylase, chloroplasic                                         |
| TCONS_00023986 | 0.407926 | 0.29552      | 0.380428   | BGIOSGA026020 | XP_004958141.1transcription termination factor MTERF9, chloroplasic                             |
| TCONS_00032582 | 0.408129 | 0.541284     | 0.549852   | BGIOSGA018613 | XP_002465046.1shaggy-related protein kinase alpha isoform X1                                    |
| TCONS_00021107 | 0.40814  | -1.29284     | -1.25422   | BGIOSGA006997 | XP_006657170.1 UPPF047 protein YjbQ                                                             |
| TCONS_00020343 | 0.408153 | -0.317009    | 0.465516   | BGIOSGA003499 | XP_006655904.1 non-specific lipid-transfer protein-like 1                                       |
| TCONS_00018405 | 0.408174 | -1.00741     | -0.951976  | BGIOSGA020457 | XP_006654849.1 jasmonic acid-amido synthetase JAR1                                              |
| TCONS_00026860 | 0.408293 | 0.985009     | 0.103661   | BGIOSGA028916 | XP_006659535.2 cytochrome c oxidase assembly protein COX15                                      |
| TCONS_00009392 | 0.40837  | 0.667806     | 0.815644   | BGIOSGA011941 | XP_006649463.1PREDICTED: uncharacterized protein LOC102722470, partial                          |
| TCONS_00023827 | 0.408384 | 0.512216     | 0.645392   | BGIOSGA025856 | XP_003562988.1pre-rRNA-processing protein ESF1                                                  |
| TCONS_00034303 | 0.408392 | 0.416635     | 0.3262     | BGIOSGA036638 | XP_003578924.1uncharacterized abhydrolase domain-containing protein DDB_G0269086                |
| TCONS_00037419 | 0.408494 | 1.53178      | 0.581178   | BGIOSGA028917 | XP_004962991.1probable galacturonosyltransferase 13                                             |
| TCONS_00008713 | 0.408494 | -0.434229    | 0.801353   | BGIOSGA028928 | XP_015689331.1 uncharacterized WD repeat-containing protein C2A9.03-like                        |
| TCONS_00026633 | 0.40852  | 0.510682     | 0.470081   | BGIOSGA027985 | XP_006659413.1 annexin D5-like                                                                  |
| TCONS_00001587 | 0.408932 | 0.76497      | 0.685253   | BGIOSGA004222 | XP_022682576.1ATP synthase subunit beta, mitochondrial-like                                     |
| TCONS_00004426 | 0.408937 | 0.329583     | 0.110591   | BGIOSGA000796 | XP_015689921.1 bifunctional riboflavin kinase/FMN phosphatase-like                              |
| TCONS_00007269 | 0.40911  | 0.0535367    | 0.646041   | BGIOSGA007214 | XP_015688438.1 NADP-dependent D-sorbitol-6-phosphate dehydrogenase-like                         |
| TCONS_00013411 | 0.409289 | 0.349957     | 0.313976   | BGIOSGA015474 | XP_006651952.1 ethylene-responsive transcription factor RAP2-12-like                            |
| TCONS_00022269 | 0.409344 | 0.528379     | -0.165838  | BGIOSGA021226 | XP_015693746.1 protein SAWADEE                                                                  |
| TCONS_00020251 | 0.409439 | 0.475423     | 0.483553   | BGIOSGA022440 | HOMEODOMAIN HOMOLOG 2-like                                                                      |
| TCONS_00021540 | 0.409472 | -0.523317    | 0.13852    | BGIOSGA022010 | XP_015693749.1 AUGMIN subunit 3                                                                 |
| TCONS_00012229 | 0.409507 | 0.732839     | 0.931671   | BGIOSGA040269 | XP_004964427.1barley B recombinant-like protein D                                               |
| TCONS_00015745 | 0.409615 | 0.250364     | 0.700275   | BGIOSGA037210 | XP_006651566.1 fumarate hydratase 1, mitochondrial-like                                         |
| TCONS_00019623 | 0.409709 | 0.477963     | 0.202481   | BGIOSGA015394 | XP_015691418.1 3-oxoacyl-[acyl-carrier-protein] reductase 4                                     |
| TCONS_00019665 | 0.410556 | -1.99438 #NA |            | BGIOSGA032130 | XP_006654636.1PREDICTED: uncharacterized protein LOC102702848 isoform X2                        |
| TCONS_00019554 | 0.410607 | 1.45832      | -0.190999  | BGIOSGA001916 | XP_002441419.2anthocyanidin 5,3-O-glucosyltransferase                                           |
| TCONS_00006424 | 0.410794 | 0.675908     | 1.12767    | BGIOSGA014809 | XP_015693172.1 cysteine proteinase inhibitor 2-like                                             |
| TCONS_00003905 | 0.410992 | 1.29785      | 0.311948   | BGIOSGA034723 | XP_006647482.1PREDICTED: uncharacterized protein LOC102700591                                   |
| TCONS_00022195 | 0.411195 | 0.255206     | 0.689189   | BGIOSGA002059 | XP_002441721.1uncharacterized protein LOC8071415 isoform X1                                     |
| TCONS_00002550 | 0.411497 | -1.04927     | -1.35947   | BGIOSGA005192 | XP_006656057.1 phosphatidylinositol 4-kinase gamma 4-like                                       |
| TCONS_00019747 | 0.411511 | 1.50116      | 0.954304   | BGIOSGA015943 | XP_006645378.1PREDICTED: uncharacterized protein LOC102722445                                   |
| TCONS_00007581 | 0.411981 | -0.102918    | -1.18839   | BGIOSGA025437 | XP_015693370.1 CRM-domain containing factor CFM3, chloroplasic/mitochondrial                    |
| TCONS_00023972 | 0.412206 | -1.21088     | -0.67098   | BGIOSGA030566 | XP_004951504.1UDP-glycosyltransferase 73C3                                                      |
| TCONS_00023285 | 0.412261 | 1.27879      | 1.56978    | BGIOSGA013755 | XP_006657881.1 chlorophyll a-b binding protein 7, chloroplasic                                  |
| TCONS_00016804 | 0.412424 | 0.0533167    | 1.05123    | BGIOSGA018192 | XP_007034425.2 putative vesicle-associated membrane protein 726                                 |
| TCONS_00016411 | 0.412855 | 0.972357     | 0.985424   | BGIOSGA014556 | XP_017608293.1 PHD finger-like domain-containing protein 5B                                     |
| TCONS_00001465 | 0.412883 | 1.35016      | 0.140002   | BGIOSGA004103 | NP_001148070.1flowering locus D                                                                 |
|                |          |              |            |               | NP_001149398.1F-box domain containing protein                                                   |

## transcriptome

|                |          |           |            |               |                                                                                     |
|----------------|----------|-----------|------------|---------------|-------------------------------------------------------------------------------------|
| TCONS_00000639 | 0.412907 | 1.17623   | 0.918183   | BGIOSGA003223 | XP_006645748.2 DNA gyrase subunit B, chloroplastic/mitochondrial                    |
| TCONS_00026097 | 0.412918 | -0.296908 | -0.207375  | BGIOSGA019490 | XP_015695988.1 probable LRR receptor-like serine/threonine-protein kinase At1g56140 |
| TCONS_00011344 | 0.412952 | 0.32165   | -0.779575  | BGIOSGA027713 | XP_004981029.1monothiol glutaredoxin-S7, chloroplastic isoform X2                   |
| TCONS_00008020 | 0.413359 | -0.354488 | -0.362092  | BGIOSGA008809 | XP_006648643.1 U-box domain-containing protein 9-like                               |
| TCONS_00016666 | 0.413388 | 1.8993    | 1.41707    | BGIOSGA028097 | XP_006652864.1 helicase-like transcription factor CHR28                             |
| TCONS_00001899 | 0.413478 | 0.758898  | 0.245865   | BGIOSGA002192 | XP_003569928.1casein kinase 1-like protein HDT6                                     |
| TCONS_00006197 | 0.413581 | -1.94315  | 0.355005   | BGIOSGA016030 | XP_006647342.1 alpha carbonic anhydrase 1, chloroplastic-like                       |
| TCONS_00036900 | 0.413641 | 0.124205  | 1.18137    | BGIOSGA031602 | XP_006661926.1 F-box/LRR-repeat protein At3g48880                                   |
| TCONS_00031051 | 0.41418  | 0.413054  | 0.899668   | BGIOSGA021160 | XP_006661752.1 probable methionine-tRNA ligase                                      |
| TCONS_00028456 | 0.414298 | 0.561199  | 0.144929   | BGIOSGA026506 | XP_006660379.1 phosphatidylinositol-3-phosphatase myotubularin-1-like               |
| TCONS_00007902 | 0.414334 | 1.31101   | 1.84893    | #N/A          | #N/A                                                                                |
| TCONS_00009861 | 0.414506 | -0.333091 | -0.0467275 | BGIOSGA012412 | XP_006649922.1 NADH dehydrogenase [ubiquinone] 1 alpha subcomplex subunit 8-B-like  |
| TCONS_00020613 | 0.414774 | 0.911722  | 0.828307   | BGIOSGA005728 | XP_004965340.160S ribosomal protein L31                                             |
| TCONS_00001787 | 0.414783 | -0.304883 | 0.547731   | BGIOSGA036243 | XP_006644339.1 serine/threonine-protein phosphatase 7 long form homolog             |
| TCONS_00013274 | 0.414901 | -0.534874 | -0.175268  | BGIOSGA017702 | XP_015691153.1 reticulon-like protein B8                                            |
| TCONS_00027969 | 0.414914 | #NA       | 1.81679    | #N/A          | #N/A                                                                                |
| TCONS_00027577 | 0.41499  | -0.154856 | 0.023745   | BGIOSGA027443 | XP_015696220.1 VIN3-like protein 2 isoform X1                                       |
| TCONS_00018504 | 0.415361 | -0.538281 | -0.435261  | BGIOSGA000008 | XP_006653975.1 11S globulin seed storage protein 2-like                             |
| TCONS_00028849 | 0.415428 | 0.290136  | -0.150099  | BGIOSGA014624 | XP_006660567.2 histone-lysine N-methyltransferase, H3 lysine-9 specific SUVH6-like  |
| TCONS_00024059 | 0.415469 | -0.630601 | -1.22891   | BGIOSGA010297 | XP_006657933.1 UDP-arabinopyranose mutase 3                                         |
| TCONS_00018146 | 0.415935 | 1.46382   | 0.430568   | BGIOSGA002373 | XP_006655495.1 VQ motif-containing protein 4-like                                   |
| TCONS_00018042 | 0.416329 | 0.482172  | 0.582679   | BGIOSGA010841 | XP_006654573.1 endoplasmic reticulum-Golgi intermediate compartment protein 3-like  |
| TCONS_00028374 | 0.416343 | 1.43584   | 0.661158   | BGIOSGA024653 | XP_015695940.1 nuclear transport factor 2 isoform X2                                |
| TCONS_00004307 | 0.416558 | 0.842013  | 0.793546   | BGIOSGA008040 | NP_001131270.1NADH-ubiquinone oxidoreductase subunit                                |
| TCONS_00016122 | 0.416686 | 1.03629   | 1.21936    | BGIOSGA027740 | XP_015692269.1 programmed cell death protein 4-like isoform X2                      |
| TCONS_00015779 | 0.416914 | 0.961056  | 0.862559   | BGIOSGA016727 | XP_006652211.2 2,3-dimethylmalate lyase-like                                        |
| TCONS_00006422 | 0.417518 | 0.967809  | 1.36326    | BGIOSGA009461 | XP_015689639.1 U1 snRNP-associated protein usp106-like isoform X1                   |
| TCONS_00034141 | 0.417737 | 1.0773    | 0.405772   | BGIOSGA018329 | XP_015698917.1 regulatory-associated protein of TOR 2                               |
| TCONS_00000492 | 0.41781  | -1.54794  | -0.816481  | BGIOSGA017578 | XP_006643945.1 auxin-responsive protein IAA3                                        |
| TCONS_00008008 | 0.417844 | 0.682459  | 0.847152   | BGIOSGA006469 | XP_006648640.1PREDICTED: uncharacterized protein LOC102712146                       |
| TCONS_00021813 | 0.418106 | 1.00978   | 0.638815   | BGIOSGA009128 | XP_015693828.1 probable cyclic nucleotide-gated ion channel 20, chloroplastic       |
| TCONS_00004753 | 0.418125 | 0.228502  | 0.117114   | BGIOSGA004830 | NP_001150939.1undecaprenyl pyrophosphate synthetase                                 |
| TCONS_00015681 | 0.418419 | 0.399382  | 0.0527931  | BGIOSGA033725 | XP_006653291.1 LRR receptor-like serine/threonine-protein kinase GSO1               |
| TCONS_00002221 | 0.41849  | 1.80796   | 0.273397   | BGIOSGA004856 | XP_006645067.1PREDICTED: uncharacterized protein LOC102703079                       |
| TCONS_00020673 | 0.41863  | -2.69402  | 0.0727825  | BGIOSGA022858 | XP_015694103.1PREDICTED: uncharacterized protein LOC102712736                       |
| TCONS_00021677 | 0.418917 | 0.24068   | 0.228491   | BGIOSGA001699 | XP_006655823.1 serine/threonine-protein phosphatase PP1                             |
| TCONS_00036965 | 0.419054 | 0.215401  | -0.796351  | BGIOSGA001610 | XP_002440701.1cytochrome P450 71A1                                                  |
| TCONS_00001340 | 0.419068 | 0.844227  | 0.364329   | BGIOSGA016414 | XP_006644357.1 N-alpha-acetyltransferase 50                                         |
| TCONS_00014013 | 0.41922  | 0.866756  | 0.588658   | BGIOSGA016161 | XP_003581104.1sister chromatid cohesion protein SCC4                                |
| TCONS_00009722 | 0.41939  | 0.552737  | 0.555194   | BGIOSGA012272 | XP_006649789.2 vacuolar protein sorting-associated protein 9A-like                  |
| TCONS_00006598 | 0.419426 | 1.07539   | -0.499556  | BGIOSGA017378 | XP_015688900.1 probable phospholipid hydroperoxide glutathione peroxidase           |
| TCONS_00022682 | 0.419675 | -0.674347 | -0.202724  | BGIOSGA020758 | XP_014753040.1D-3-phosphoglycerate dehydrogenase 3, chloroplastic                   |
| TCONS_00015298 | 0.419683 | 0.271758  | 0.148696   | BGIOSGA007384 | XP_015692108.1 serine/arginine-rich splicing factor RS31-like                       |
| TCONS_00014731 | 0.419727 | 0.321182  | -0.213678  | BGIOSGA016905 | XP_006652627.1 sugar phosphatase YfbT                                               |
| TCONS_00004740 | 0.419822 | 0.230787  | 0.741508   | BGIOSGA035882 | XP_015692458.1 AT-rich interactive domain-containing protein 2-like                 |
| TCONS_00036035 | 0.420192 | 1.95989   | 0.566137   | BGIOSGA037872 | XP_021301326.1uncharacterized membrane protein YMR155W                              |
| TCONS_00003140 | 0.420197 | 0.333123  | -0.516174  | BGIOSGA015765 | XP_021313006.1hydroxyphenylpyruvate reductase                                       |
| TCONS_00030679 | 0.4202   | 1.90847   | -1.06264   | BGIOSGA025520 | XP_006650706.1 probable aldehyde oxidase 2                                          |
| TCONS_00026113 | 0.420267 | -1.92329  | -1.00752   | BGIOSGA029263 | XP_006659210.1 putative potassium transporter 12 isoform X1                         |
| TCONS_00024309 | 0.420348 | -0.970448 | -1.28335   | BGIOSGA035641 | XP_006658084.1 lipase-like                                                          |
| TCONS_00008102 | 0.420487 | -2.14034  | -1.25015   | BGIOSGA015148 | XP_012698745.1uncharacterized protein At4g22758                                     |
| TCONS_00027765 | 0.420646 | 1.83576   | -0.014294  | BGIOSGA031243 | XP_010234557.1HSP-interacting protein                                               |
| TCONS_00020568 | 0.420774 | 0.435165  | 0.787645   | BGIOSGA022745 | XP_006656025.1 serine/threonine-protein phosphatase 4 regulatory subunit 2          |



## transcriptome

|                |          |           |             |               |                                                                                              |
|----------------|----------|-----------|-------------|---------------|----------------------------------------------------------------------------------------------|
| TCONS_00022463 | 0.420971 | 1.01012   | 1.25007     | BGIOSGA020992 | XP_015694225.1 transcriptional elongation regulator MINIYO                                   |
| TCONS_00004121 | 0.421083 | -0.479944 | -0.230238   | BGIOSGA021040 | XP_015691232.1 aspartic proteinase oryzasin-1-like                                           |
| TCONS_00021456 | 0.421142 | -0.314797 | 0.214348    | BGIOSGA007334 | XP_015693759.1 PREDICTED: uncharacterized protein LOC102721843                               |
| TCONS_00023990 | 0.421155 | 1.60549   | 1.09873     | BGIOSGA017631 | XP_006657891.1 probable serine/threonine-protein kinase WNK5                                 |
| TCONS_00027646 | 0.421161 | 1.75233   | 0.972249    | BGIOSGA027368 | XP_003573607.1 aspartate carbamoyltransferase, chloroplastic                                 |
| TCONS_00000211 | 0.421729 | 1.41553   | 1.55077     | BGIOSGA001568 | XP_006643766.1 histone H2B.5                                                                 |
| TCONS_00012164 | 0.421884 | 0.0789632 | 0.835683    | BGIOSGA010846 | NP_001105640.1 aquaporin SIP2-1                                                              |
| TCONS_00021788 | 0.422757 | 0.376915  | -0.414678   | BGIOSGA021734 | XP_002436639.1 peroxiredoxin Q, chloroplastic                                                |
| TCONS_00013396 | 0.422851 | 0.267482  | 0.920911    | BGIOSGA000776 | XP_006650774.1 triacylglycerol lipase SDP1-like                                              |
| TCONS_00028688 | 0.422906 | 0.191802  | 1.11169     | BGIOSGA028485 | XP_015696604.1 PREDICTED: uncharacterized protein LOC102699985 isoform X2                    |
| TCONS_00013819 | 0.422972 | 0.385328  | 0.990249    | BGIOSGA037315 | XP_021318603.1 aspartyl protease family protein 1 isoform X1                                 |
| TCONS_00016392 | 0.423105 | 1.8154    | 1.15039     | BGIOSGA013368 | XP_003580303.1 putative cis-zeatin O-glucosyltransferase                                     |
| TCONS_00018301 | 0.423124 | -0.463061 | -0.964072   | BGIOSGA001041 | XP_006655586.2 putative mediator of RNA polymerase II transcription subunit 26               |
| TCONS_00022725 | 0.423351 | 0.578011  | -0.55507    | BGIOSGA020726 | XP_002438805.1 fructose-1,6-bisphosphatase, chloroplastic                                    |
| TCONS_00003424 | 0.423407 | 0.409029  | 2.42527     | BGIOSGA023501 | XP_002448545.1 uncharacterized protein LOC8074717 isoform X2                                 |
| TCONS_00001669 | 0.423442 | -0.338348 | 0.0953173   | BGIOSGA004304 | XP_006644593.1 trafficking protein particle complex subunit 5                                |
| TCONS_00018051 | 0.423846 | -0.195087 | 0.250313    | BGIOSGA035410 | XP_006654586.1 dr1-associated corepressor-like isoform X1                                    |
| TCONS_00008894 | 0.423995 | 0.307039  | 1.44991     | BGIOSGA009631 | XP_004954081.1 uncharacterized protein LOC101763834                                          |
| TCONS_00000188 | 0.424337 | -0.258691 | 0.293384    | BGIOSGA002763 | XP_006643751.1 PREDICTED: uncharacterized protein LOC102714864                               |
| TCONS_00003143 | 0.42437  | 1.03884   | 1.92926     | BGIOSGA002221 | XP_006643941.1 eukaryotic translation initiation factor 3 subunit L-like                     |
| TCONS_00031069 | 0.424532 | -0.541068 | -1.87182    | BGIOSGA029500 | XP_006660800.1 mimitin, mitochondrial                                                        |
| TCONS_00002580 | 0.424583 | -1.05571  | -0.87195    | BGIOSGA005222 | XP_010232844.1 nitrate regulatory gene2 protein                                              |
| TCONS_00026571 | 0.424698 | -1.97607  | -0.363478   | BGIOSGA011433 | XP_015695825.1 heavy metal-associated isoprenylated plant protein 26-like                    |
| TCONS_00018469 | 0.424698 | -0.461493 | 0.543413    | BGIOSGA026501 | XP_024447371.1 actin-7-like                                                                  |
| TCONS_00037428 | 0.424788 | -0.565358 | 0.0266878   | BGIOSGA029710 | XP_006664148.1 zinc finger protein 7-like                                                    |
| TCONS_00007714 | 0.4249   | 0.884053  | -0.67971    | BGIOSGA032871 | NP_001151100.1 VQ motif family protein                                                       |
| TCONS_00004183 | 0.4249   | -0.530985 | 0.642218    | #N/A          | #N/A                                                                                         |
| TCONS_00018194 | 0.42514  | -0.841225 | -2.43212    | BGIOSGA006665 | XP_006654700.2 calcineurin B-like protein 4 isoform X2                                       |
| TCONS_00002227 | 0.425585 | 0.941059  | 0.13483     | BGIOSGA017824 | XP_015691898.1 VAMP-like protein YKT61                                                       |
| TCONS_00007132 | 0.425632 | 0.487627  | 0.679969    | BGIOSGA027881 | XP_006648145.1 NAC domain-containing protein 53                                              |
| TCONS_00035248 | 0.42613  | 0.947756  | 0.758667    | BGIOSGA033657 | XP_015698088.1 1-acyl-sn-glycerol-3-phosphate acyltransferase PLS1 isoform X2                |
| TCONS_00019446 | 0.426189 | 1.76532   | 0.543448    | BGIOSGA011800 | XP_010231289.1 phosphatidate phosphatase PAH1                                                |
| TCONS_00034113 | 0.426751 | 0.500097  | -0.138258   | BGIOSGA006114 | XP_015697535.1 mitochondrial substrate carrier family protein C-like                         |
| TCONS_00030760 | 0.426834 | 0.178487  | 0.822871    | BGIOSGA024641 | XP_006661647.1 F-box protein At2g26160-like                                                  |
| TCONS_00013270 | 0.426863 | 0.111337  | 0.859326    | BGIOSGA009716 | XP_006650679.1 alpha N-terminal protein methyltransferase 1                                  |
| TCONS_00019887 | 0.426881 | 1.39644   | 0.537251    | BGIOSGA037404 | XP_015693052.1 calcium-dependent protein kinase 3-like                                       |
| TCONS_00003077 | 0.427044 | 1.25541   | 0.500151    | BGIOSGA024910 | XP_006643896.1 PREDICTED: uncharacterized protein LOC102710914                               |
| TCONS_00015018 | 0.427333 | -0.570476 | 0.565214    | BGIOSGA024122 | XP_003580624.2 G-type lectin S-receptor-like serine/threonine-protein kinase B120 isoform X1 |
| TCONS_00025735 | 0.427388 | 2.45532   | 0.442983    | BGIOSGA002157 | XP_006658162.1 galactinol synthase 2-like                                                    |
| TCONS_00037057 | 0.42794  | -2.54537  | -0.00584774 | BGIOSGA018557 | XP_003575559.1 ABC transporter G family member 11                                            |
| TCONS_00007250 | 0.428227 | 0.26162   | 0.743462    | BGIOSGA018877 | XP_015688430.1 pentatricopeptide repeat-containing protein At2g17670-like                    |
| TCONS_00002426 | 0.428298 | -1.16731  | -2.14424    | BGIOSGA011529 | XP_006646619.1 PREDICTED: uncharacterized protein At4g15970-like                             |
| TCONS_00014760 | 0.428358 | 1.18295   | 0.369137    | BGIOSGA013241 | XP_008790519.1 ORM1-like protein 3                                                           |
| TCONS_00024182 | 0.428449 | -0.219227 | -0.788068   | BGIOSGA026220 | XP_006658014.1 chaperone protein DnaJ                                                        |
| TCONS_00018998 | 0.428508 | -2.01354  | -1.10706    | BGIOSGA018367 | XP_015693295.1 PREDICTED: uncharacterized protein LOC102709083 isoform X3                    |
| TCONS_00008654 | 0.428726 | -0.121206 | -1.40584    | BGIOSGA000012 | XP_015689467.1 soluble inorganic pyrophosphatase                                             |
| TCONS_00004850 | 0.428784 | -1.1325   | 0.165345    | BGIOSGA019892 | XP_004970825.1 serine/arginine repetitive matrix protein 1 isoform X2                        |
| TCONS_00023171 | 0.428978 | 0.780484  | 0.745141    | BGIOSGA025767 | XP_006657560.2 eukaryotic translation initiation factor 3 subunit E                          |
| TCONS_00035791 | 0.42898  | 0.809506  | 0.074341    | BGIOSGA037196 | XP_006664450.1 argininosuccinate synthase, chloroplastic                                     |
| TCONS_00009558 | 0.42922  | 1.43018   | 1.18542     | BGIOSGA029934 | XP_015696697.1 protein transport protein Sec61 subunit alpha-like isoform X1                 |
| TCONS_00006474 | 0.429233 | -0.587064 | -0.341686   | BGIOSGA025612 | XP_006647537.1 glycolipid transfer protein 1-like                                            |
| TCONS_00008465 | 0.429312 | 0.693194  | 0.923605    | BGIOSGA014666 | XP_006648877.1 thioredoxin M1, chloroplastic                                                 |
| TCONS_00007431 | 0.429641 | 0.174624  | 0.382608    | BGIOSGA017683 | XP_006646949.1 ALA-interacting subunit 1                                                     |
| TCONS_00026581 | 0.429744 | 0.789591  | 0.705509    | BGIOSGA028649 | XP_006659386.1 uncharacterized WD repeat-containing protein C2A9.03                          |
| TCONS_00007434 | 0.429902 | 0.478399  | 0.270311    | BGIOSGA007234 | XP_006646952.1 serine/threonine-protein kinase HT1-like                                      |

## transcriptome

|                |          |             |           |               |                                                                                                      |
|----------------|----------|-------------|-----------|---------------|------------------------------------------------------------------------------------------------------|
| TCONS_00004767 | 0.42997  | -0.00582385 | 0.423138  | BGIOSGA015452 | XP_015695251.1PREDICTED: uncharacterized protein LOC107304671                                        |
| TCONS_00030174 | 0.430093 | 0.684855    | -0.913495 | BGIOSGA029639 | XP_003576610.2probable carboxylesterase 12                                                           |
| TCONS_00019691 | 0.430162 | 2.39549     | 0.863018  | BGIOSGA004347 | XP_004961397.1protein MLN51 homolog                                                                  |
| TCONS_00012895 | 0.430448 | 0.67187     | 1.07182   | BGIOSGA026319 | XP_006651672.2 DEAD-box ATP-dependent RNA helicase 10                                                |
| TCONS_00008551 | 0.430691 | 1.55873     | 0.404848  | BGIOSGA033096 | XP_012698797.1 heterodimeric geranylgeranyl pyrophosphate synthase small subunit, chloroplastic      |
| TCONS_00010287 | 0.430707 | 1.047       | -0.397841 | BGIOSGA023917 | XP_006650187.1 probable small nuclear ribonucleoprotein G                                            |
| TCONS_00019963 | 0.430716 | 0.23866     | -0.827576 | BGIOSGA022151 | XP_006655690.2 uncharacterized membrane protein Yjcl                                                 |
| TCONS_00011429 | 0.43081  | 0.359858    | 0.334158  | BGIOSGA030821 | XP_022682441.1uncharacterized protein LOC101760608 isoform X2                                        |
| TCONS_00029596 | 0.430914 | 0.450888    | 0.986796  | BGIOSGA026273 | XP_015695132.1PREDICTED: uncharacterized protein LOC102715406                                        |
| TCONS_00030523 | 0.430937 | 0.250993    | 0.172292  | BGIOSGA028493 | XP_015696260.1 probable purine permease 5                                                            |
| TCONS_00002854 | 0.43099  | -0.526607   | -0.257227 | BGIOSGA010978 | XP_003565209.1protein Hook homolog 3 isoform X1                                                      |
| TCONS_00027729 | 0.431011 | #NA         | -2.27993  | BGIOSGA028250 | XP_003573587.1endo-1,3;1,4-beta-D-glucanase isoform X1                                               |
| TCONS_00002520 | 0.431087 | 0.102458    | 0.741441  | BGIOSGA005160 | XP_006645395.1 ganglioside-induced differentiation-associated protein 2                              |
| TCONS_00006018 | 0.431113 | 0.865851    | 0.772388  | BGIOSGA028234 | XP_021315883.1uncharacterized protein LOC8077808                                                     |
| TCONS_00016059 | 0.431242 | 0.481721    | -0.719402 | BGIOSGA006159 | XP_002447999.1heavy metal-associated isoprenylated plant protein 47                                  |
| TCONS_00013283 | 0.431269 | 0.526269    | 1.49828   | BGIOSGA009939 | XP_006650688.1 accelerated cell death 11                                                             |
| TCONS_00016738 | 0.431319 | 0.188764    | 0.44942   | BGIOSGA014224 | XP_006652916.1 glycerol kinase                                                                       |
| TCONS_00008198 | 0.431375 | -0.650627   | 0.23017   | BGIOSGA037716 | XP_006647392.1 glutathione S-transferase Z1-like isoform X1                                          |
| TCONS_00036129 | 0.431593 | -0.226508   | 1.05357   | BGIOSGA021094 | XP_006664597.1 ribosomal protein S10, mitochondrial                                                  |
| TCONS_00001600 | 0.431664 | -0.386157   | 0.040332  | BGIOSGA017531 | XP_003569589.1formin-like protein 15                                                                 |
| TCONS_00037619 | 0.431995 | 0.270317    | 0.502837  | BGIOSGA035747 | XP_006664798.1 structural maintenance of chromosomes protein 1                                       |
| TCONS_00016897 | 0.432074 | 1.11477     | 1.27605   | BGIOSGA022207 | XP_015691646.1 pre-mRNA cleavage factor Im 25 kDa subunit 2 isoform X1                               |
| TCONS_00008802 | 0.43241  | 1.65245     | 1.06838   | BGIOSGA029419 | XP_015688855.1 ATPase GET3-like                                                                      |
| TCONS_00004515 | 0.433264 | -0.829664   | 0.211081  | BGIOSGA020135 | XP_015688057.1 probable 1-acyl-sn-glycerol-3-phosphate acyltransferase 5                             |
| TCONS_00002532 | 0.433301 | 0.886548    | 0.909205  | BGIOSGA017605 | XP_015688273.1 uridine 5'-monophosphate synthase                                                     |
| TCONS_00035033 | 0.43406  | 0.234484    | 0.126085  | BGIOSGA033824 | XP_006662986.2 maf-like protein DDB_G0281937                                                         |
| TCONS_00027932 | 0.434095 | -0.194152   | -0.140326 | BGIOSGA030505 | XP_006659352.1 NEDD8-conjugating enzyme Ubc12-like                                                   |
| TCONS_00014187 | 0.434518 | 0.603788    | 0.995     | BGIOSGA013985 | XP_006652246.1 gibberellin 2-beta-dioxygenase 8-like                                                 |
| TCONS_00037301 | 0.434784 | 0.763313    | 0.481016  | BGIOSGA009409 | XP_004962851.1acyl carrier protein 1, chloroplastic                                                  |
| TCONS_00016097 | 0.435054 | 1.11545     | 1.38599   | BGIOSGA006133 | XP_006653523.1 NAC domain-containing protein 8-like                                                  |
| TCONS_00012488 | 0.435114 | 0.195008    | 1.47315   | BGIOSGA026075 | XP_015691218.1 EID1-like F-box protein 2                                                             |
| TCONS_00007959 | 0.435244 | -1.55178    | -2.34184  | BGIOSGA026365 | XP_003573212.1flowering-promoting factor 1-like protein 3                                            |
| TCONS_00025437 | 0.43529  | 0.312768    | 0.237929  | BGIOSGA019747 | XP_006663705.1 eukaryotic peptide chain release factor subunit 1-3-like                              |
| TCONS_00036421 | 0.435486 | 0.356479    | 0.40068   | BGIOSGA001750 | XP_006664201.2 probable beta-1,3-galactosyltransferase 20                                            |
| TCONS_00014883 | 0.43569  | -0.204296   | 0.290092  | BGIOSGA007035 | XP_006652768.1 putative glucose-6-phosphate 1-epimerase                                              |
| TCONS_00029533 | 0.435972 | 0.331612    | 0.133744  | BGIOSGA029179 | XP_006660991.1 histidine-containing phosphotransfer protein 2                                        |
| TCONS_00028098 | 0.436209 | 0.289769    | 0.0612976 | BGIOSGA008679 | XP_006648864.1 proteasome subunit alpha type-2                                                       |
| TCONS_00007507 | 0.436252 | -0.494622   | 1.24248   | BGIOSGA006978 | XP_006648402.1 biogenesis of lysosome-related organelles complex 1 subunit 2                         |
| TCONS_00032841 | 0.436343 | -0.258794   | 0.314974  | BGIOSGA036731 | XP_006663736.1 stress response protein nst1-like                                                     |
| TCONS_00001604 | 0.436357 | 0.0810235   | -0.340795 | BGIOSGA000994 | XP_024315008.1LEAF RUST 10 DISEASE-RESISTANCE LOCUS RECEPTOR-LIKE PROTEIN KINASE-like 2.4 isoform X1 |
| TCONS_00010204 | 0.436372 | 1.17872     | 0.343981  | BGIOSGA013706 | XP_003557807.1non-specific lipid transfer protein-like 1                                             |
| TCONS_00030371 | 0.436765 | -2.44722    | -1.40759  | BGIOSGA029427 | XP_004957380.1uncharacterized protein LOC101772217                                                   |
| TCONS_00010210 | 0.436978 | 1.0961      | 0.545204  | BGIOSGA012773 | XP_015689919.1 intron-binding protein aquarius                                                       |
| TCONS_00018149 | 0.437034 | -0.0434879  | 0.927335  | BGIOSGA020207 | XP_006654659.2 probable transcriptional regulatory protein At2g25830 isoform X2                      |
| TCONS_00000329 | 0.437243 | -2.71422    | #NA       | BGIOSGA019276 | XP_021316038.1uncharacterized protein LOC110435051                                                   |
| TCONS_00023646 | 0.437927 | -0.827881   | 0.498567  | BGIOSGA025668 | XP_006657681.2 protein SET DOMAIN GROUP 40                                                           |
| TCONS_00018427 | 0.437974 | 0.640596    | 0.751689  | BGIOSGA020481 | XP_006654871.1 DNA damage-binding protein 1a                                                         |
| TCONS_00003289 | 0.43811  | 1.24805     | 1.47856   | BGIOSGA034747 | XP_006644039.2 hydroxymethylglutaryl-CoA lyase, mitochondrial-like                                   |
| TCONS_00036020 | 0.438291 | 0.552199    | 0.658875  | BGIOSGA029518 | XP_003575526.1NAC domain-containing protein 83                                                       |
| TCONS_00010180 | 0.438326 | -0.465926   | 0.0425514 | BGIOSGA012743 | XP_010651562.1 protein DGS1, mitochondrial isoform X2                                                |
| TCONS_00026679 | 0.438348 | 0.947212    | 0.910678  | BGIOSGA028746 | XP_004973553.1uncharacterized protein LOC101785423                                                   |

transcriptome

|                |          |            |           |              |                                                                                              |
|----------------|----------|------------|-----------|--------------|----------------------------------------------------------------------------------------------|
| TCONS_00011050 | 0.438654 | -0.0337989 | 1.24215   | BGOSGA013648 | XP_015691305.1 protein AE7-like 1 isoform X2                                                 |
| TCONS_00011454 | 0.438676 | -0.282893  | -0.249892 | BGOSGA022218 | XP_006649278.1 peroxisomal membrane protein 11-1                                             |
| TCONS_00012091 | 0.438757 | 0.814161   | 1.4591    | BGOSGA010918 | XP_006651283.1 malonyl CoA-acyl carrier protein transacylase                                 |
| TCONS_00003256 | 0.439066 | 0.1298     | 0.904139  | BGOSGA001959 | XP_006644012.1 zinc finger CCOH domain-containing protein 5                                  |
| TCONS_00001029 | 0.439118 | 0.809173   | 0.281314  | BGOSGA003632 | XP_006645939.1 IisH domain and HEAT repeat-containing protein KIAA1468                       |
| TCONS_00018968 | 0.439191 | 0.732621   | -0.263703 | BGOSGA040645 | XP_006654198.1 B-cell receptor-associated protein 31-like                                    |
| TCONS_00025516 | 0.439296 | 1.23361    | 0.0745279 | BGOSGA010379 | XP_006657946.1 40S ribosomal protein S3-1-like                                               |
| TCONS_00009711 | 0.439355 | 1.19128    | 0.676507  | BGOSGA012260 | XP_006649775.1 ERAD-associated E3 ubiquitin-protein ligase component HRD3                    |
| TCONS_00010270 | 0.439486 | 0.477469   | 0.348179  | BGOSGA012833 | XP_015691266.1 3beta-hydroxysteroid-dehydrogenase/decarboxylase isoform 1-like               |
| TCONS_00004295 | 0.439539 | -0.131897  | -1.30157  | BGOSGA000912 | XP_015695435.1 UPF0544 protein C5orf45 homolog isoform X2                                    |
| TCONS_00020054 | 0.439837 | 1.10086    | 0.40616   | BGOSGA009886 | XP_006656597.2 probable aminotransferase ACS12                                               |
| TCONS_00006512 | 0.439958 | 0.349644   | 0.448816  | BGOSGA026895 | XP_006648864.1 proteasome subunit alpha type-2                                               |
| TCONS_00026376 | 0.440119 | 1.06694    | 0.948878  | BGOSGA017594 | XP_006661015.1 dynamin-related protein 1E-like                                               |
| TCONS_00024273 | 0.440331 | 0.367397   | 1.40458   | BGOSGA006661 | XP_006658066.1 E3 ubiquitin-protein ligase SINAT5-like                                       |
| TCONS_00023082 | 0.440465 | -0.905109  | -0.251196 | #N/A         | #N/A                                                                                         |
| TCONS_00036902 | 0.440523 | 0.328671   | -0.427393 | BGOSGA031600 | XP_015697413.1 folylpolyglutamate synthase-like                                              |
| TCONS_00002195 | 0.440539 | 1.04318    | 0.105874  | BGOSGA004831 | XP_015688350.1 nucleobase-ascorbate transporter 12                                           |
| TCONS_00036459 | 0.440729 | -0.131653  | -0.216335 | BGOSGA039527 | XP_006664220.1 5-methyltetrahydropteroyl/triglutamate--homocysteine methyltransferase 1      |
| TCONS_00005051 | 0.440814 | 0.414105   | 0.717571  | BGOSGA000165 | XP_015690875.1 succinate dehydrogenase subunit 4, mitochondrial-like                         |
| TCONS_00023922 | 0.440894 | 0.639708   | -1.49727  | BGOSGA032295 | XP_015694961.1 internal alternative NAD(P)H-ubiquinone oxidoreductase A1, mitochondrial-like |
| TCONS_00017787 | 0.440962 | -0.143941  | 0.578885  | BGOSGA029370 | XP_006654382.1 peptide methionine sulfoxide reductase B3, chloroplastic-like                 |
| TCONS_00022184 | 0.441464 | -0.364769  | 1.43519   | BGOSGA030767 | XP_004965464.1 cyclin-dependent kinase F-1                                                   |
| TCONS_00032228 | 0.441471 | 1.28084    | 0.693526  | BGOSGA016156 | XP_006661780.2 heat stress transcription factor A-2c-like                                    |
| TCONS_00024669 | 0.441476 | 0.560606   | 0.0139387 | BGOSGA033015 | XP_010229183.1 uncharacterized protein LOC100832216                                          |
| TCONS_00033759 | 0.441626 | -0.303996  | 0.532929  | BGOSGA032051 | XP_024311160.1 putative disease resistance RPP13-like protein 2 isoform X9                   |
| TCONS_00021402 | 0.442194 | -0.738042  | -1.84049  | BGOSGA018841 | XP_004966497.1 NADH dehydrogenase [ubiquinone] 1 beta subcomplex subunit 2                   |
| TCONS_00005177 | 0.442227 | -0.522993  | -0.982119 | BGOSGA012302 | XP_006646733.1 protease HtpX homolog                                                         |
| TCONS_00017728 | 0.442494 | 1.92295    | -0.23288  | BGOSGA005204 | XP_006654349.1 protein RETICULATA-RELATED 4, chloroplastic-like                              |
| TCONS_00021557 | 0.442582 | 0.337877   | 1.24843   | BGOSGA021991 | XP_002437769.1 putative transferase At4g12130, mitochondrial                                 |
| TCONS_00028173 | 0.442589 | 0.0944513  | 1.13752   | BGOSGA036668 | XP_006660212.1 phosphoglycerate mutase-like protein 4                                        |
| TCONS_00003563 | 0.442601 | 0.0254504  | 0.60517   | BGOSGA001637 | XP_015693510.1 PREDICTED: uncharacterized protein LOC102703266                               |
| TCONS_00023923 | 0.442695 | -0.34825   | 0.891748  | BGOSGA034397 | XP_015692329.1 cell differentiation protein RCD1 homolog                                     |
| TCONS_00032751 | 0.442696 | 0.490117   | 0.409985  | BGOSGA031358 | XP_015697328.1 PREDICTED: uncharacterized protein LOC102719988                               |
| TCONS_00020226 | 0.44273  | 1.87482    | 0.320481  | BGOSGA022418 | NP_001152138.1 leucoanthocyanidin dioxygenase                                                |
| TCONS_00022995 | 0.442777 | -0.584934  | -0.16297  | #N/A         | #N/A                                                                                         |
| TCONS_00025582 | 0.442908 | -3.30588   | -0.435631 | BGOSGA026223 | XP_006658037.1 dirigent protein 5-like                                                       |
| TCONS_00017163 | 0.443256 | 0.397094   | 0.564718  | BGOSGA019209 | XP_006654062.1 U1 small nuclear ribonucleoprotein A                                          |
| TCONS_00001316 | 0.443388 | 1.27849    | 0.273653  | BGOSGA037095 | XP_006644347.1 bidirectional sugar transporter SWEET6b                                       |
| TCONS_00004364 | 0.44348  | 2.48783    | 2.01039   | #N/A         | #N/A                                                                                         |
| TCONS_00016788 | 0.44357  | 0.44819    | 1.08055   | BGOSGA014179 | XP_014750930.1 transcription factor IBH1                                                     |
| TCONS_00006967 | 0.443699 | -0.885969  | 0.883748  | BGOSGA022655 | XP_006649098.1 probable polygalacturonase                                                    |
| TCONS_00013662 | 0.444086 | 0.902113   | 0.62553   | BGOSGA015822 | XP_004975033.1 uncharacterized protein LOC101763724                                          |
| TCONS_00024792 | 0.444259 | -0.568943  | 0.524286  | BGOSGA024576 | XP_003561285.2 glycerol-3-phosphate dehydrogenase [NAD(+)], chloroplastic isoform X1         |
| TCONS_00035470 | 0.444694 | -1.44322   | -1.10312  | BGOSGA036879 | XP_006663744.1 probable non-specific lipid-transfer protein 3                                |
| TCONS_00007530 | 0.445068 | 1.09875    | 0.461332  | BGOSGA009663 | XP_006647019.2 zinc finger A20 and AN1 domain-containing stress-associated protein 4         |
| TCONS_00023799 | 0.445204 | -1.72378   | -0.730923 | BGOSGA025836 | XP_006657776.1 PREDICTED: uncharacterized protein LOC102707981                               |
| TCONS_00013072 | 0.445239 | 0.137945   | 0.475289  | BGOSGA009909 | XP_006650504.1 putative 3,4-dihydroxy-2-butanone kinase isoform X1                           |
| TCONS_00023691 | 0.445463 | -1.11825   | -1.2677   | BGOSGA025723 | NP_001146339.1 uncharacterized LOC100279915                                                  |
| TCONS_00001115 | 0.445467 | 0.555996   | 1.04602   | BGOSGA003737 | XP_006645991.1 F-box protein SKIP8                                                           |
| TCONS_00015158 | 0.445467 | -0.0611472 | -0.2868   | BGOSGA019310 | XP_006653016.1 ubiquinone biosynthesis protein COQ4 homolog, mitochondrial                   |
| TCONS_00016320 | 0.445499 | 0.303616   | -0.420188 | BGOSGA012986 | XP_006653623.2 elongation factor G-2, chloroplastic                                          |

## transcriptome

|                |          |            |            |               |                                                                                                |
|----------------|----------|------------|------------|---------------|------------------------------------------------------------------------------------------------|
| TCONS_00008780 | 0.445555 | 0.0599959  | -0.0872173 | BGIOSGA022620 | XP_006647864.1 pyruvate dehydrogenase E1 component subunit alpha-1, mitochondrial              |
| TCONS_00014462 | 0.445866 | 2.00891    | 0.382592   | BGIOSGA008549 | XP_006652429.1 uncharacterized membrane protein At3g27390-like isoform X2                      |
| TCONS_00010348 | 0.445876 | 1.22921    | 1.0689     | BGIOSGA012571 | XP_006650229.1 xanthine dehydrogenase                                                          |
| TCONS_00029281 | 0.446047 | 0.0704157  | 0.910129   | BGIOSGA031023 | XP_006660789.1 ER membrane protein complex subunit 3                                           |
| TCONS_00016977 | 0.446221 | -1.74422   | 0.64841    | BGIOSGA019329 | XP_010231853.1 general transcription and DNA repair factor IIH subunit TFB5                    |
| TCONS_00026371 | 0.446221 | 0.798169   | 0.526049   | BGIOSGA026750 | XP_006659294.1 heterogeneous nuclear ribonucleoprotein 1                                       |
| TCONS_00029391 | 0.446369 | -1.68465   | -0.947059  | BGIOSGA031142 | XP_006660884.1 PREDICTED: uncharacterized protein LOC102721765 isoform X1                      |
| TCONS_00019008 | 0.446402 | -0.0248546 | 0.38155    | BGIOSGA003596 | XP_008674833.1 uncharacterized protein LOC103651017 isoform X3                                 |
| TCONS_00011804 | 0.4465   | 0.190231   | 0.721349   | BGIOSGA005977 | XP_006647573.1 DEAD-box ATP-dependent RNA helicase 47A                                         |
| TCONS_00033907 | 0.446518 | 0.510658   | 1.01231    | BGIOSGA035600 | XP_015698148.1 GTPase Der                                                                      |
| TCONS_00019908 | 0.446751 | -0.0705767 | -0.319187  | BGIOSGA017455 | XP_006654869.1 ATP-dependent Clp protease proteolytic subunit-related protein 1, chloroplastic |
| TCONS_00003264 | 0.446773 | 1.11291    | 0.98702    | BGIOSGA001951 | XP_006644021.1 NAC domain-containing protein 74-like isoform X1                                |
| TCONS_00028829 | 0.446903 | 1.11808    | -0.540893  | BGIOSGA013642 | XP_008651015.2 putative receptor-like protein kinase family protein isoform X1                 |
| TCONS_00030804 | 0.446997 | -0.318754  | -0.84871   | BGIOSGA025952 | XP_003564044.1 UDP-glycosyltransferase 73C5                                                    |
| TCONS_00007464 | 0.446998 | -1.50366   | -0.905344  | BGIOSGA028747 | XP_006646979.2 chorismate mutase 2-like                                                        |
| TCONS_00010473 | 0.446998 | 0.595879   | 1.48697    | BGIOSGA035577 | XP_006650290.1 E3 ubiquitin-protein ligase At3g02290-like                                      |
| TCONS_00003982 | 0.447088 | -0.544589  | -0.816726  | BGIOSGA001853 | XP_014753532.1 acyl transferase 5                                                              |
| TCONS_00036072 | 0.447179 | -0.277452  | 1.03835    | BGIOSGA008681 | XP_004972657.1 receptor kinase-like protein Xa21                                               |
| TCONS_00030726 | 0.44718  | -1.40435   | -0.735874  | BGIOSGA011174 | XP_014660130.1 F-box/LRR-repeat protein At2g29930                                              |
| TCONS_00019028 | 0.44736  | 0.0216486  | 0.728977   | BGIOSGA018331 | XP_006654248.1 PREDICTED: uncharacterized protein LOC102707586 isoform X1                      |
| TCONS_00007452 | 0.447569 | 0.445893   | 0.691649   | BGIOSGA007031 | XP_006648369.1 CASP-like protein 2C2                                                           |
| TCONS_00032534 | 0.447578 | 0.982858   | 1.33832    | BGIOSGA031581 | XP_006661933.1 chaperone protein dnaJ 13 isoform X2                                            |
| TCONS_00020127 | 0.447601 | 0.00478013 | -0.400619  | BGIOSGA013553 | XP_006656641.1 cysteine synthase-like                                                          |
| TCONS_00025605 | 0.447761 | -0.267584  | 0.432599   | BGIOSGA003276 | XP_006663861.1 gamma carbonic anhydrase 2, mitochondrial                                       |
| TCONS_00022232 | 0.447777 | -1.13425   | 0.383488   | BGIOSGA021882 | XP_006656067.1 mitogen-activated protein kinase 11 isoform X1                                  |
| TCONS_00005091 | 0.4478   | -0.077971  | 0.262578   | BGIOSGA000114 | XP_006645394.1 pyrroline-5-carboxylate reductase                                               |
| TCONS_00019292 | 0.447907 | 1.54889    | 1.36719    | BGIOSGA026248 | XP_006655320.2 bZIP transcription factor 17-like                                               |
| TCONS_00037550 | 0.447951 | -0.559349  | -0.515149  | BGIOSGA009687 | XP_006664214.1 protein IQ-DOMAIN 1-like isoform X2                                             |
| TCONS_00014708 | 0.448165 | #NA        | -0.738333  | BGIOSGA002747 | XP_006653648.1 ethylene-responsive transcription factor ERF039-like                            |
| TCONS_00000672 | 0.448174 | -0.616786  | -0.20104   | BGIOSGA018469 | XP_006644062.1 magnesium-protoporphyrin IX monomethyl ester [oxidative] cyclase, chloroplastic |
| TCONS_00021537 | 0.4482   | 0.272431   | 0.537215   | BGIOSGA022013 | XP_006655745.2 nudix hydrolase 14, chloroplastic-like                                          |
| TCONS_00033510 | 0.448211 | 0.0708428  | 0.135641   | BGIOSGA035304 | XP_006662944.1 SUMO-activating enzyme subunit 1A-like                                          |
| TCONS_00008525 | 0.448286 | 0.783665   | 1.1248     | BGIOSGA005902 | XP_015688810.1 F-box protein At5g51380-like                                                    |
| TCONS_00031216 | 0.448498 | 0.999974   | 0.508765   | BGIOSGA033036 | XP_004983002.1 translin                                                                        |
| TCONS_00017254 | 0.448574 | 1.27334    | 0.854347   | BGIOSGA015509 | XP_006655064.2 PREDICTED: uncharacterized protein LOC102713187, partial                        |
| TCONS_00029020 | 0.448959 | -0.578744  | -0.688608  | BGIOSGA004090 | XP_004956842.1 ubiquitin-NEDD8-like protein RUB1                                               |
| TCONS_00011760 | 0.448975 | -1.26874   | -0.775175  | BGIOSGA035931 | XP_015689809.1 BTB/POZ domain-containing protein At5g67385                                     |
| TCONS_00001752 | 0.449188 | -0.100786  | 0.657669   | BGIOSGA004388 | XP_006644657.1 uncharacterized membrane protein sll0875                                        |
| TCONS_00001471 | 0.449232 | 0.259136   | 0.317762   | BGIOSGA012682 | XP_006644440.1 GDSL esterase/lipase At1g28600-like isoform X2                                  |
| TCONS_00002674 | 0.449521 | 0.15883    | 0.0463877  | BGIOSGA005869 | XP_006643651.1 peroxisomal membrane protein PEX14 isoform X1                                   |
| TCONS_00002649 | 0.449528 | 0.60134    | 0.156935   | BGIOSGA006955 | XP_006645415.1 dnaJ protein P58IPK homolog                                                     |
| TCONS_00032209 | 0.449602 | 0.0255484  | 0.921056   | BGIOSGA031928 | XP_006661771.1 ribosomal RNA small subunit methyltransferase I isoform X2                      |
| TCONS_00008698 | 0.449625 | #NA        | -1.74197   | BGIOSGA033111 | XP_015688382.1 protein NRT1/ PTR FAMILY 7.3-like isoform X2                                    |
| TCONS_00004570 | 0.449736 | 0.150911   | 0.535293   | BGIOSGA000644 | XP_006644850.1 bifunctional endo-1,4-beta-xylanase XylA                                        |
| TCONS_00035887 | 0.449872 | 0.516541   | -1.04644   | BGIOSGA007558 | XP_006663954.1 ribulose bisphosphate carboxylase small chain, chloroplastic-like               |
| TCONS_00006877 | 0.449967 | -0.326888  | 0.215547   | BGIOSGA021621 | XP_015689672.1 shikimate kinase 1, chloroplastic-like                                          |
| TCONS_00017491 | 0.450207 | 0.180259   | -0.761996  | BGIOSGA019560 | XP_006655169.1 PREDICTED: uncharacterized protein LOC102709369                                 |
| TCONS_00011706 | 0.450235 | -0.128101  | 0.186131   | BGIOSGA014986 | XP_006651118.1 ubiquitin carboxyl-terminal hydrolase 3-like                                    |
| TCONS_00034706 | 0.450363 | -0.039465  | -0.065254  | BGIOSGA032520 | XP_006662892.1 E3 ubiquitin-protein ligase At3g02290                                           |
| TCONS_00030559 | 0.450512 | -1.48948   | 0.420891   | BGIOSGA029257 | XP_015696739.1 GDSL esterase/lipase At5g03610-like                                             |
| TCONS_00019101 | 0.450659 | -1.12711   | 0.816049   | BGIOSGA012136 | XP_006654274.1 protein EARLY RESPONSIVE TO DEHYDRATION 15-like                                 |
| TCONS_00018470 | 0.450722 | 0.865895   | 0.777113   | BGIOSGA027714 | XP_020395801.1 actin-97 isoform X2                                                             |

transcriptome

|                |          |             |            |               |                                                                                          |
|----------------|----------|-------------|------------|---------------|------------------------------------------------------------------------------------------|
| TCONS_00031390 | 0.450953 | 0.392644    | 0.131735   | BGIOSGA033201 | XP_006661905.1 protochlorophyllide reductase B, chloroplastic                            |
| TCONS_00019561 | 0.451071 | 0.813132    | 0.543955   | BGIOSGA034558 | XP_006654594.1 metacaspase-5-like                                                        |
| TCONS_00032942 | 0.451114 | 0.885041    | 1.07185    | BGIOSGA036963 | XP_015698210.1 2-isopropylmalate synthase A-like                                         |
| TCONS_00012670 | 0.451134 | 0.822124    | 0.147524   | BGIOSGA010290 | XP_006651583.1 peptidyl-prolyl cis-trans isomerase E                                     |
| TCONS_00001898 | 0.45116  | 0.811151    | 1.09595    | BGIOSGA004532 | XP_006646377.1 coenzyme Q-binding protein COQ10 homolog B, mitochondrial                 |
| TCONS_00030088 | 0.451247 | 0.872834    | 0.95459    | BGIOSGA013814 | XP_021309876.1 transcription initiation factor TFIID subunit 10 isoform X2               |
| TCONS_00007247 | 0.451283 | 0.69257     | 0.376779   | BGIOSGA007671 | XP_006646790.1 pentatricopeptide repeat-containing protein At2g01860                     |
| TCONS_00030320 | 0.451399 | -0.217029   | -0.0512195 | BGIOSGA014305 | XP_015696667.1 F-box/LRR-repeat protein At4g14103-like                                   |
| TCONS_00018752 | 0.451509 | 1.82285     | 1.91633    | BGIOSGA030710 | XP_006654122.2 hexokinase-7                                                              |
| TCONS_00025651 | 0.451604 | 1.80419     | 1.36861    | BGIOSGA023774 | XP_015694879.1 RNA pseudouridine synthase 6, chloroplastic isoform X1                    |
| TCONS_00009098 | 0.451799 | 1.06045     | 0.560769   | BGIOSGA005306 | XP_006648174.1 beta-catenin-like protein 1                                               |
| TCONS_00003334 | 0.451951 | 0.852668    | 0.771646   | BGIOSGA036276 | XP_015688256.1 cell division cycle protein 123 homolog                                   |
| TCONS_00008424 | 0.452052 | -1.97695    | -0.898282  | BGIOSGA006001 | XP_006647544.1 phenylalanine ammonia-lyase                                               |
| TCONS_00029951 | 0.452097 | 1.02946     | 1.65829    | BGIOSGA019462 | XP_006660590.1 leucine-tRNA ligase, cytoplasmic-like                                     |
| TCONS_00021288 | 0.452272 | -2.7327     | -2.01156   | BGIOSGA020502 | XP_006656410.1 probable receptor-like serine/threonine-protein kinase At5g57670          |
| TCONS_00005127 | 0.452338 | 0.0250044   | 0.292625   | BGIOSGA000077 | XP_015698877.1 lipid droplet-associated hydrolase isoform X5                             |
| TCONS_00030736 | 0.452348 | 1.04819     | 1.80934    | BGIOSGA032547 | XP_023157674.1 uncharacterized protein LOC100279122 isoform X3                           |
| TCONS_00031298 | 0.452368 | 1.18226     | 1.4532     | BGIOSGA019107 | XP_006661850.1 heterogeneous nuclear ribonucleoprotein 1-like                            |
| TCONS_00035666 | 0.452391 | 0.246025    | 0.648383   | BGIOSGA031260 | XP_004977230.1 replication factor C subunit 2                                            |
| TCONS_00036692 | 0.452431 | -0.735155   | 0.316666   | BGIOSGA036619 | XP_006663822.2 ACT domain-containing protein ACR12-like                                  |
| TCONS_00012561 | 0.452795 | 0.324066    | 0.584255   | BGIOSGA023617 | XP_004982546.1 protein FATTY ACID EXPORT 5                                               |
| TCONS_00036273 | 0.452816 | 0.091798    | 0.339929   | BGIOSGA035980 | XP_004982818.1 mitochondrial import inner membrane translocase subunit Tim9              |
| TCONS_00030418 | 0.453093 | -0.294617   | 0.578761   | BGIOSGA028457 | XP_006660882.1 polygalacturonate 4-alpha-galacturonosyltransferase-like                  |
| TCONS_00035429 | 0.453101 | 1.85122     | 0.135776   | BGIOSGA017974 | XP_006664261.2 pentatricopeptide repeat-containing protein At3g09650, chloroplastic-like |
| TCONS_00025716 | 0.453136 | -0.00165795 | 0.838769   | BGIOSGA012565 | XP_004958710.1 eukaryotic translation initiation factor 2 subunit beta                   |
| TCONS_00037052 | 0.453173 | -2.14887    | -2.33571   | BGIOSGA015844 | XP_004977747.2 uncharacterized protein LOC101761830                                      |
| TCONS_00006818 | 0.454541 | 0.125704    | 1.21721    | BGIOSGA008992 | XP_006649018.1 APO protein 2, chloroplastic                                              |
| TCONS_00033310 | 0.454694 | 1.25539     | 0.565281   | BGIOSGA022558 | XP_015689208.1 polyadenylate-binding protein 2-like isoform X1                           |
| TCONS_00031528 | 0.454771 | 1.52156     | 0.715648   | BGIOSGA033345 | XP_006661993.1 lysine-specific histone demethylase 1 homolog 3                           |
| TCONS_00027003 | 0.454806 | 0.413088    | 0.196725   | BGIOSGA016275 | XP_006659624.1 protein NUCLEAR FUSION DEFECTIVE 4                                        |
| TCONS_00037531 | 0.455111 | 0.852445    | -0.0068537 | BGIOSGA035572 | XP_006664745.1 2-methyl-6-phytyl-1,4-hydroquinone methyltransferase 2, chloroplastic     |
| TCONS_00006647 | 0.456251 | 0.492855    | 0.69613    | BGIOSGA008421 | XP_006648936.1 pentatricopeptide repeat-containing protein At1g11290, chloroplastic-like |
| TCONS_00015257 | 0.456611 | -1.1025     | 0.43127    | BGIOSGA015764 | XP_003580691.1 glyoxylate/hydroxypyruvate reductase HPR3 isoform X4                      |
| TCONS_00031258 | 0.456924 | 0.393366    | 0.0534514  | BGIOSGA032579 | XP_006662414.1 3-ketoacyl-CoA thiolase 2, peroxisomal-like                               |
| TCONS_00018681 | 0.457444 | 0.404305    | 0.526945   | BGIOSGA010094 | XP_004977129.1 zinc transporter 6                                                        |
| TCONS_00013968 | 0.457682 | 1.48973     | 1.44132    | BGIOSGA001726 | XP_006652172.1 tRNA (adenine(58)-N(1))-methyltransferase catalytic subunit TRMT61A       |
| TCONS_00008559 | 0.457698 | -0.137372   | 0.586434   | BGIOSGA014546 | XP_010555194.1 protein LAZ1 isoform X3                                                   |
| TCONS_00012032 | 0.457805 | 0.00290273  | 0.318338   | BGIOSGA010974 | XP_015689847.1 protein SIEL                                                              |
| TCONS_00020858 | 0.458406 | 0.901521    | 1.35244    | BGIOSGA024882 | XP_015694291.1 shaggy-related protein kinase eta-like                                    |
| TCONS_00035276 | 0.458519 | -1.07891    | -0.785807  | BGIOSGA012277 | XP_003575753.2 probable aminotransferase TAT2 isoform X1                                 |
| TCONS_00026268 | 0.458547 | -1.05106    | 0.510318   | #N/A          | XP_006659261.1 probable DNA replication complex GINS protein PSF3                        |
| TCONS_00005130 | 0.458635 | 1.03955     | 0.563861   | BGIOSGA000072 | XP_015699266.1 tRNA uridine 5-carboxymethylaminomethyl modification enzyme MnmG          |
| TCONS_00006262 | 0.458777 | 0.493209    | -0.490475  | BGIOSGA012235 | XP_004952809.1 ACT domain-containing protein ACR3                                        |
| TCONS_00028432 | 0.458811 | -2.93296    | -0.238444  | BGIOSGA005938 | XP_015696048.1 kinesin-like protein NACK2 isoform X1                                     |
| TCONS_00027206 | 0.45894  | 0.920668    | 0.828806   | BGIOSGA027794 | XP_003571293.1 PHD finger protein EHD3                                                   |
| TCONS_00005682 | 0.458943 | 1.00955     | 0.796862   | BGIOSGA007805 | XP_006647077.1 elongation factor 1-gamma 2                                               |
| TCONS_00026387 | 0.458995 | 0.987201    | 1.17327    | BGIOSGA028455 | XP_015695566.1 GMP synthase [glutamine-hydrolyzing]                                      |
| TCONS_00032576 | 0.459088 | 1.03303     | 0.436377   | BGIOSGA021029 | XP_006661964.1 plant UBX domain-containing protein 10                                    |
| TCONS_00019666 | 0.459297 | 0.257111    | -1.15293   | BGIOSGA033858 | XP_002441420.2 respiratory burst oxidase homolog protein A                               |
| TCONS_00020157 | 0.459475 | 0.475429    | 0.715927   | BGIOSGA001018 | XP_006655812.1 long chain acyl-CoA synthetase 4-like                                     |
| TCONS_00031354 | 0.459524 | 0.514615    | 0.195696   | BGIOSGA033167 | XP_015697417.1 pre-mRNA-processing ATP-dependent RNA helicase PRP5                       |
| TCONS_00007739 | 0.459885 | -0.427699   | 0.486472   | BGIOSGA006742 | XP_006647131.1 50S ribosomal protein L21, chloroplastic                                  |

transcriptome

|                |          |            |             |               |                                                                                                   |
|----------------|----------|------------|-------------|---------------|---------------------------------------------------------------------------------------------------|
| TCONS_00017215 | 0.460049 | 0.386464   | 0.286026    | BGIOSGA020929 | XP_004960817.1adenine nucleotide transporter BT1, chloroplastic/mitochondrial                     |
| TCONS_00010977 | 0.460058 | 1.13297    | 0.52469     | BGIOSGA013580 | XP_003559369.1solute carrier family 25 member 44 isoform X1                                       |
| TCONS_00008300 | 0.460058 | 0.357012   | 0.170407    | BGIOSGA014873 | XP_006647450.1 isocitrate dehydrogenase [NAD] regulatory subunit 1, mitochondrial-like isoform X1 |
| TCONS_00006244 | 0.460096 | 0.633275   | -0.0555883  | BGIOSGA020673 | XP_006647357.1 midasin-like                                                                       |
| TCONS_00025064 | 0.460114 | 0.861556   | 0.12471     | BGIOSGA006063 | XP_003563153.1CDGSH iron-sulfur domain-containing protein NEET                                    |
| TCONS_00007414 | 0.460361 | 1.28587    | 0.591391    | BGIOSGA007060 | XP_002453366.1uncharacterized protein LOC8077174                                                  |
| TCONS_00006709 | 0.460502 | 0.231167   | -0.218381   | BGIOSGA016743 | XP_003572855.1probable tocopherol O-methyltransferase, chloroplastic                              |
| TCONS_00008826 | 0.460795 | -0.325565  | 0.162695    | BGIOSGA035305 | XP_006647922.1 5'-adenylsulfate reductase-like 3                                                  |
| TCONS_00025434 | 0.460879 | -0.65637   | 0.270037    | BGIOSGA023994 | XP_004958172.1arabinosyltransferase RRA3                                                          |
| TCONS_00012752 | 0.460906 | -1.40907   | -1.06962    | BGIOSGA022961 | XP_006650317.1 protein DETOXIFICATION 33                                                          |
| TCONS_00025981 | 0.461651 | 0.728101   | 0.619312    | BGIOSGA024943 | XP_015695506.1 protein CHLORORESPIRATORY REDUCTION 6, chloroplastic                               |
| TCONS_00028272 | 0.462632 | 0.0912579  | 1.13047     | BGIOSGA029548 | XP_006660265.1 IRK-interacting protein-like                                                       |
| TCONS_00012819 | 0.462638 | 1.44673    | 1.8288      | BGIOSGA035826 | XP_015689991.1 probable translation initiation factor eIF-2B subunit delta                        |
| TCONS_00011507 | 0.462717 | 1.91556    | -0.756016   | BGIOSGA038595 | XP_006649332.1 catalase-1                                                                         |
| TCONS_00022790 | 0.462762 | 1.38445    | 1.24353     | BGIOSGA020663 | XP_015693684.1 calcium homeostasis endoplasmic reticulum protein                                  |
| TCONS_00017851 | 0.462835 | 1.84371    | 0.603539    | BGIOSGA031837 | XP_015693041.1 poly(A) RNA polymerase gld-2 homolog B-like                                        |
| TCONS_00025892 | 0.463048 | 0.980553   | 1.59135     | BGIOSGA027964 | XP_015695489.1 pentatricopeptide repeat-containing protein At5g50390, chloroplastic               |
| TCONS_00012395 | 0.463171 | 2.02173    | 1.65276     | BGIOSGA010590 | XP_002465170.1probable inactive heme oxygenase 2, chloroplastic                                   |
| TCONS_00004077 | 0.463272 | -2.07172   | 0.136791    | BGIOSGA013510 | XP_015689423.1 protein trichome birefringence-like 3B                                             |
| TCONS_00028712 | 0.463273 | 0.16395    | 0.785613    | BGIOSGA010478 | XP_006660513.1 THO complex subunit 3                                                              |
| TCONS_00013046 | 0.463432 | 0.23299    | -0.569771   | BGIOSGA010352 | XP_003560805.1uncharacterized protein LOC100828553                                                |
| TCONS_00022872 | 0.46361  | 1.00818    | 0.483698    | BGIOSGA007487 | XP_015693701.1 probable histone acetyltransferase HAC-like 2                                      |
| TCONS_00009042 | 0.463715 | -0.192978  | -0.821823   | BGIOSGA005363 | XP_006648112.1PREDICTED: uncharacterized protein LOC102718148                                     |
| TCONS_00033744 | 0.464111 | -0.0478029 | -0.240958   | BGIOSGA033682 | XP_006663010.2 glutathione S-transferase T1                                                       |
| TCONS_00006944 | 0.464132 | 1.82209    | 0.608313    | BGIOSGA009125 | XP_015689394.1 protein NRDE2 homolog                                                              |
| TCONS_00003186 | 0.464234 | 0.429566   | 0.49698     | BGIOSGA002029 | XP_006643979.1PREDICTED: uncharacterized protein LOC102712301                                     |
| TCONS_00000298 | 0.464284 | 0.248931   | 0.989896    | BGIOSGA029245 | XP_006645556.2PREDICTED: uncharacterized protein LOC102709890                                     |
| TCONS_00031860 | 0.464529 | -0.407382  | 0.212344    | BGIOSGA030275 | XP_006661643.1 aldose 1-epimerase-like                                                            |
| TCONS_00033874 | 0.464571 | -0.0864598 | -0.0253248  | BGIOSGA031878 | XP_004974997.1BTB/POZ and MATH domain-containing protein 1                                        |
| TCONS_00028034 | 0.464637 | 0.11653    | 0.0818229   | BGIOSGA029808 | XP_006659414.1PREDICTED: uncharacterized protein LOC102710043                                     |
| TCONS_00010799 | 0.464703 | -0.271376  | -0.783316   | BGIOSGA013423 | XP_006650475.1PREDICTED: uncharacterized protein LOC102708320                                     |
| TCONS_00009192 | 0.464877 | -0.119976  | 0.511789    | BGIOSGA024944 | XP_006649279.1 riboflavin biosynthesis protein PYRD, chloroplastic                                |
| TCONS_00005227 | 0.464893 | -0.0792374 | 0.450957    | BGIOSGA007337 | XP_002451348.1putative nitric oxide synthase isoform X1                                           |
| TCONS_00030525 | 0.464896 | 0.270227   | 0.234517    | BGIOSGA007666 | XP_006660968.1 probable protein phosphatase 2C 70 isoform X2                                      |
| TCONS_00024074 | 0.465615 | 0.925173   | 0.870813    | BGIOSGA034217 | XP_015695173.1 PHD finger protein ALFIN-LIKE 9                                                    |
| TCONS_00006443 | 0.465642 | 1.22298    | 0.262178    | BGIOSGA023320 | XP_006647498.1 pentatricopeptide repeat-containing protein At3g16010                              |
| TCONS_00014728 | 0.465892 | 0.340202   | 0.345137    | BGIOSGA005684 | XP_006652223.1 U4/U6 small nuclear ribonucleoprotein Prp31                                        |
| TCONS_00035322 | 0.465916 | -0.0410674 | 1.07157     | BGIOSGA033590 | XP_006663094.1 translationally-controlled tumor protein homolog                                   |
| TCONS_00008212 | 0.465972 | -0.40176   | 0.434537    | BGIOSGA022945 | NP_001158931.2uncharacterized LOC100303836                                                        |
| TCONS_00029923 | 0.46629  | 1.02837    | 0.651584    | BGIOSGA029884 | XP_006660578.1 protein SCO1 homolog 2, mitochondrial                                              |
| TCONS_00005590 | 0.466459 | -0.522874  | 0.594098    | BGIOSGA014904 | XP_006647012.2 protein TIC 21, chloroplastic-like                                                 |
| TCONS_00036473 | 0.466536 | -0.755158  | -1.49002    | BGIOSGA018238 | XP_008644627.2 atherin                                                                            |
| TCONS_00025003 | 0.466773 | -0.944585  | -0.00859164 | BGIOSGA005571 | XP_006659938.2 methionine aminopeptidase 1B, chloroplastic-like isoform X2                        |
| TCONS_00010606 | 0.466778 | -0.162626  | 0.695693    | BGIOSGA013228 | XP_006650356.1 glutamyl-tRNA(Gln) amidotransferase subunit C, chloroplastic/mitochondrial         |
| TCONS_00028435 | 0.46691  | 0.18944    | -0.816201   | BGIOSGA022038 | XP_002444625.1geraniol 8-hydroxylase                                                              |
| TCONS_00006717 | 0.466916 | 0.516734   | 1.31933     | BGIOSGA008886 | XP_006648967.1 ornithine carbamoyltransferase, chloroplastic                                      |
| TCONS_00001782 | 0.466935 | 0.984897   | 0.901877    | BGIOSGA004420 | XP_006644673.1 pentatricopeptide repeat-containing protein At4g32450, mitochondrial-like          |
| TCONS_00001889 | 0.467104 | 1.52833    | 0.822484    | BGIOSGA004523 | XP_006644771.2PREDICTED: uncharacterized protein LOC102712032                                     |
| TCONS_00019109 | 0.467206 | 0.47819    | 1.23352     | BGIOSGA006573 | XP_006654278.1 40S ribosomal protein S7                                                           |
| TCONS_00005951 | 0.467279 | 0.103374   | 0.709757    | BGIOSGA008088 | XP_015688389.1 coiled-coil domain-containing protein 130                                          |
| TCONS_00027192 | 0.467335 | -0.86518   | 0.0232212   | BGIOSGA034737 | XP_015696197.1 protein S-acyltransferase 8-like isoform X1                                        |
| TCONS_00023964 | 0.467569 | -0.53782   | -0.551483   | BGIOSGA037243 | XP_006657878.2 pheophytinase, chloroplastic                                                       |
| TCONS_00030255 | 0.467629 | -0.157625  | 1.37258     | BGIOSGA012100 | XP_015696523.1 probable polygalacturonase                                                         |

## transcriptome

|                |          |           |            |               |                                                                                                  |
|----------------|----------|-----------|------------|---------------|--------------------------------------------------------------------------------------------------|
| TCONS_00007141 | 0.467694 | 1.71854   | -1.56888   | BGIOSGA026130 | XP_006649189.1 remorin                                                                           |
| TCONS_00011545 | 0.4679   | 0.384242  | 1.0253     | BGIOSGA026845 | XP_006651028.1 PREDICTED: uncharacterized protein LOC102705992                                   |
| TCONS_00012298 | 0.467904 | -0.451577 | 0.413142   | BGIOSGA010698 | XP_006651399.1 branched-chain-amino-acid aminotransferase-like protein 1                         |
| TCONS_00033089 | 0.468073 | -1.03917  | 0.260328   | BGIOSGA034933 | XP_014758273.1 protein CELLULOSE SYNTHASE INTERACTIVE 3 isoform X2                               |
| TCONS_00033804 | 0.468126 | 1.70047   | -0.891202  | BGIOSGA012751 | XP_006663032.1 40S ribosomal protein S9-2-like XP_021310867.1 uncharacterized protein LOC8082175 |
| TCONS_00025620 | 0.468196 | -0.533556 | -0.0506139 | BGIOSGA037767 | XP_015689350.1 transcription factor PIL1-like                                                    |
| TCONS_00008998 | 0.468221 | 0.427143  | 0.353793   | BGIOSGA029759 | XP_006646884.1 PREDICTED: uncharacterized protein LOC102711040                                   |
| TCONS_00005429 | 0.468405 | 0.295746  | 0.374941   | BGIOSGA026672 | XP_015688262.1 protein TRM32 isoform X1                                                          |
| TCONS_00002831 | 0.468774 | 0.118488  | -0.0894327 | BGIOSGA002388 | XP_006656895.1 UDP-glycosyltransferase 708A6-like                                                |
| TCONS_00020553 | 0.468806 | -1.89552  | -0.358147  | BGIOSGA004012 | XP_004962596.1 protein ABHD17B                                                                   |
| TCONS_00037015 | 0.468965 | 0.744793  | 0.658585   | BGIOSGA006979 | XP_002458980.1 peptidyl-prolyl cis-trans isomerase FKBP15-1                                      |
| TCONS_00004961 | 0.468975 | 0.02209   | 0.318884   | BGIOSGA010966 | XP_015697395.1 PREDICTED: uncharacterized protein LOC107305181                                   |
| TCONS_00031981 | 0.469005 | -1.03996  | -0.584331  | BGIOSGA032667 | XP_006660780.1 cinnamoyl-CoA reductase 1-like                                                    |
| TCONS_00030277 | 0.469192 | -1.12214  | 0.118257   | BGIOSGA003282 | XP_006653765.2 protein argonaute 2-like                                                          |
| TCONS_00014942 | 0.469333 | 2.81047   | 2.27493    | BGIOSGA017124 | XP_006663091.1 palmitoyl-acyl carrier protein thioesterase, chloroplastic-like                   |
| TCONS_00008484 | 0.469353 | -0.804747 | -0.151428  | BGIOSGA023195 | XP_015691633.1 protein SEH1                                                                      |
| TCONS_00003999 | 0.469478 | 0.195159  | 1.26091    | BGIOSGA003134 | XP_015692660.1 PREDICTED: uncharacterized protein LOC102720710                                   |
| TCONS_00018116 | 0.469478 | -1.60484  | -1.35881   | BGIOSGA031705 | XP_003581407.1 isocitrate dehydrogenase [NADP]                                                   |
| TCONS_00014573 | 0.46961  | 0.601631  | 1.02453    | BGIOSGA000017 | XP_008663663.1 putative ripening-related protein 5                                               |
| TCONS_00031363 | 0.46986  | -2.56951  | #NA        | BGIOSGA037599 | XP_004965953.1 uncharacterized protein At2g34160                                                 |
| TCONS_00020990 | 0.469963 | 0.435855  | 0.75444    | BGIOSGA006921 | XP_015693234.1 vesicle-fusing ATPase                                                             |
| TCONS_00019641 | 0.470031 | 2.10029   | 1.19752    | BGIOSGA017716 | XP_015695269.1 luc7-like protein 3                                                               |
| TCONS_00025038 | 0.470643 | 0.204808  | 0.792721   | BGIOSGA024368 | XP_006651815.1 PREDICTED: uncharacterized protein LOC102713345                                   |
| TCONS_00013167 | 0.470891 | 0.563593  | 0.617055   | BGIOSGA009817 | XP_006657427.1 peptidyl-prolyl cis-trans isomerase FKBP19, chloroplastic                         |
| TCONS_00023069 | 0.471018 | 0.30007   | 0.0205436  | BGIOSGA025099 | XP_006644843.2 protein CHLOROPLAST ENHANCING STRESS TOLERANCE, chloroplastic                     |
| TCONS_00001978 | 0.471237 | 0.707272  | 0.252478   | BGIOSGA021947 | XP_015693459.1 protein SRG1                                                                      |
| TCONS_00020176 | 0.471365 | 0.0346737 | 0.994202   | BGIOSGA004646 | XP_006650911.1 mucin-1-like                                                                      |
| TCONS_00013553 | 0.4714   | -3.57143  | #NA        | BGIOSGA029432 | XP_006649898.1 PREDICTED: uncharacterized protein LOC102704684                                   |
| TCONS_00037304 | 0.471411 | 0.686636  | 0.519404   | BGIOSGA012381 | XP_015692279.1 PREDICTED: uncharacterized protein LOC102716962                                   |
| TCONS_00016864 | 0.471645 | 0.510318  | 0.126679   | BGIOSGA027827 | NP_001147727.2 nuclear transcription factor Y subunit B-3                                        |
| TCONS_00025508 | 0.471743 | 0.310781  | 0.668839   | BGIOSGA006176 | XP_002452300.1 CLP protease regulatory subunit CLPX1, mitochondrial                              |
| TCONS_00006286 | 0.471761 | -0.436882 | -0.637197  | BGIOSGA000027 | XP_015697783.1 F-box/LRR-repeat protein 12 isoform X1                                            |
| TCONS_00033262 | 0.471915 | 0.0339808 | -0.485209  | BGIOSGA035085 | XP_006660913.1 probable aquaporin PIP2-7                                                         |
| TCONS_00029428 | 0.471947 | -2.18553  | -2.30656   | BGIOSGA005878 | XP_006664758.1 ubiquitin carboxyl-terminal hydrolase 8-like                                      |
| TCONS_00036445 | 0.472031 | 0.704682  | 0.962674   | BGIOSGA001026 | XP_006660535.1 E3 ubiquitin-protein ligase At1g63170-like isoform X1                             |
| TCONS_00029824 | 0.472433 | 0.0335415 | 0.0998887  | BGIOSGA009173 | NP_001147842.1 BSD domain containing protein                                                     |
| TCONS_00013113 | 0.472785 | 0.153439  | 0.35626    | BGIOSGA009280 | XP_006650704.1 E3 ubiquitin-protein ligase RHF2A-like                                            |
| TCONS_00013303 | 0.472972 | 0.0543445 | 0.742144   | BGIOSGA033772 | XP_006661853.2 DEXH-box ATP-dependent RNA helicase DEXH1                                         |
| TCONS_00032407 | 0.473313 | -0.127332 | 0.464185   | BGIOSGA011812 | XP_002442893.1 fructose-bisphosphate aldolase, chloroplastic                                     |
| TCONS_00035641 | 0.473375 | -3.6754   | -2.95548   | BGIOSGA023247 | XP_006657970.1 ADP-ribosylation factor-related protein 1-like                                    |
| TCONS_00025536 | 0.473407 | -0.136883 | -0.311994  | BGIOSGA012794 | XP_006650360.1 protein PNS1-like isoform X1                                                      |
| TCONS_00012834 | 0.473466 | 0.937782  | 1.0663     | BGIOSGA010136 | XP_006650747.1 vesicle-associated membrane protein 721-like                                      |
| TCONS_00011154 | 0.473471 | 1.22439   | 1.38394    | BGIOSGA037943 | XP_004960698.1 TLC domain-containing protein At5g14285                                           |
| TCONS_00035812 | 0.473516 | -0.326177 | #NA        | BGIOSGA024755 | XP_006643862.1 mitochondrial-processing peptidase subunit alpha-like                             |
| TCONS_00000354 | 0.47359  | 0.532834  | 0.640392   | BGIOSGA002930 | XP_006644195.1 CRS2-associated factor 1, chloroplastic-like                                      |
| TCONS_00000990 | 0.473654 | -0.604033 | 0.578542   | BGIOSGA003590 | XP_006657708.1 mitochondrial import inner membrane translocase subunit TIM44-2-like isoform X1   |
| TCONS_00024962 | 0.473751 | 0.61995   | 1.20358    | BGIOSGA024432 | XP_010227690.1 protein SAWADEE HOMEODOMAIN HOMOLOG 2                                             |
| TCONS_00022267 | 0.473912 | 0.0103577 | 0.152447   | BGIOSGA021223 | XP_008382314.1 SKP1-like protein 1A                                                              |
| TCONS_00036350 | 0.474162 | 1.36626   | 0.909705   | BGIOSGA035901 | NP_001149564.1 OB-fold nucleic acid binding domain containing protein                            |
| TCONS_00021439 | 0.474176 | 1.83593   | 1.43123    | BGIOSGA018990 | XP_006644917.2 protein FATTY ACID EXPORT 3, chloroplastic                                        |
| TCONS_00004634 | 0.474234 | 1.33188   | 0.151643   | BGIOSGA019930 | XP_006651073.2 nuclear ribonuclease Z                                                            |
| TCONS_00005661 | 0.474385 | 1.06865   | 1.03879    | BGIOSGA030634 | XP_006659218.1 26S proteasome non-ATPase regulatory subunit 8 homolog A                          |
| TCONS_00025004 | 0.474394 | -0.311126 | -0.602428  | BGIOSGA024395 | XP_006644137.1 serine carboxypeptidase-like 33                                                   |
| TCONS_00000834 | 0.47446  | -1.35482  | -0.402179  | BGIOSGA014682 |                                                                                                  |

## transcriptome

|                |          |            |            |               |                                                                                                       |
|----------------|----------|------------|------------|---------------|-------------------------------------------------------------------------------------------------------|
| TCONS_00002377 | 0.474536 | 0.704303   | 0.949106   | BGIOSGA036374 | XP_006645195.1 lysine-specific demethylase JM705-like                                                 |
| TCONS_00008988 | 0.474795 | 0.591578   | 0.618927   | BGIOSGA028749 | XP_006648063.1 calcineurin subunit B-like                                                             |
| TCONS_00000651 | 0.475044 | 1.1015     | 1.42301    | BGIOSGA003235 | XP_002455437.1RPI140-upstream gene protein                                                            |
| TCONS_00025307 | 0.475206 | 1.71262    | 0.974139   | BGIOSGA000690 | XP_004957966.1universal stress protein PHOS34                                                         |
| TCONS_00013533 | 0.475273 | -0.928256  | 0.900077   | BGIOSGA020605 | XP_006665034.1 DNA-directed RNA polymerases II, IV and V subunit 8B-like                              |
| TCONS_00018721 | 0.475333 | 0.152702   | 0.0846564  | BGIOSGA013925 | XP_006654101.1 serine/threonine protein phosphatase 2A 57 kDa regulatory subunit B' iota isoform-like |
| TCONS_00009512 | 0.475466 | -0.784753  | 0.662836   | BGIOSGA012060 | XP_015689805.1PREDICTED: uncharacterized protein LOC102707941                                         |
| TCONS_00037407 | 0.475466 | 0.862945   | 0.279507   | #N/A          | #N/A                                                                                                  |
| TCONS_00004459 | 0.475539 | -1.19277   | 0.769983   | BGIOSGA000762 | XP_006644760.2 formamidase-like                                                                       |
| TCONS_00011884 | 0.475763 | -5.57694   | -1.47365   | BGIOSGA033514 | XP_003558366.1thaumatin-like protein 1 isoform X1                                                     |
| TCONS_00020342 | 0.475813 | 0.592919   | 0.147709   | BGIOSGA027710 | XP_003564107.1bZIP transcription factor 46                                                            |
| TCONS_00021886 | 0.476001 | -1.81433   | -0.719252  | BGIOSGA021638 | XP_020399667.1protein CELLULOSE SYNTHASE INTERACTIVE 1 isoform X1                                     |
| TCONS_00012368 | 0.476002 | -0.251877  | -0.260118  | BGIOSGA010619 | XP_006650142.1 zinc finger CCCH domain-containing protein 15 homolog                                  |
| TCONS_00007122 | 0.476149 | 0.193569   | 0.599974   | BGIOSGA032681 | XP_006648134.1 bet1-like SNARE 1-1 isoform X1                                                         |
| TCONS_00032240 | 0.476186 | -1.35508   | 0.487819   | BGIOSGA031900 | XP_012699917.1CCR4-NOT transcription complex subunit 7-like                                           |
| TCONS_00018477 | 0.476398 | -1.99278   | 0.731219   | BGIOSGA028661 | XP_021312951.1uncharacterized protein LOC110433976                                                    |
| TCONS_00006328 | 0.476557 | 0.00701838 | -0.176066  | BGIOSGA033132 | XP_015688647.1 NAC domain-containing protein 92-like                                                  |
| TCONS_00012038 | 0.476651 | -1.18575   | 0.467554   | BGIOSGA010967 | XP_015691241.1 protein starmaker isoform X1                                                           |
| TCONS_00027316 | 0.476757 | 0.215165   | -0.621421  | BGIOSGA004584 | XP_006659104.1 probable NAD(P)H dehydrogenase (quinone) FQR1-like 1                                   |
| TCONS_00033905 | 0.476832 | 1.08196    | 0.82325    | BGIOSGA033112 | XP_006663067.1 heterogeneous nuclear ribonucleoprotein 1                                              |
| TCONS_00004358 | 0.476841 | 0.45832    | 0.760907   | BGIOSGA005244 | XP_006644677.1 mitochondrial-processing peptidase subunit alpha-like                                  |
| TCONS_00006912 | 0.477034 | -0.119113  | 0.910213   | BGIOSGA031312 | XP_015689460.1 peptidyl-prolyl cis-trans isomerase CYP40-like                                         |
| TCONS_00030327 | 0.47722  | 0.594957   | 1.59236    | BGIOSGA029478 | XP_002462625.2oleoyl-acyl carrier protein thioesterase 1, chloroplactic                               |
| TCONS_00013291 | 0.477323 | 1.55037    | 1.28146    | BGIOSGA030510 | XP_003559354.1protein WHAT'S THIS FACTOR 1                                                            |
| TCONS_00004096 | 0.477491 | -1.7995    | -0.464545  | BGIOSGA001092 | XP_015698979.1 myosin heavy chain, cardiac muscle isoform-like                                        |
| TCONS_00010376 | 0.477523 | 1.06087    | 0.274416   | #N/A          | #N/A                                                                                                  |
| TCONS_00001664 | 0.477645 | 0.0217451  | -0.158291  | BGIOSGA001412 | XP_006644586.1 vesicle transport v-SNARE 13                                                           |
| TCONS_00002994 | 0.477767 | 1.54982    | 0.820933   | BGIOSGA019949 | XP_006645556.2PREDICTED: uncharacterized protein LOC102709890                                         |
| TCONS_00014968 | 0.478132 | -1.60516   | -0.760693  | BGIOSGA017162 | XP_015691580.1 putative disease resistance protein At3g14460                                          |
| TCONS_00003671 | 0.47822  | -0.455252  | 0.941292   | BGIOSGA025538 | XP_006644228.1 probable ribosome biogenesis protein RLP24                                             |
| TCONS_00016210 | 0.478262 | 0.789144   | -0.0103644 | BGIOSGA025437 | XP_006653582.2 probable leucine-rich repeat receptor-like protein kinase At5g63930                    |
| TCONS_00013200 | 0.4784   | 2.03498    | 0.966233   | BGIOSGA034895 | XP_006650609.1 LRR receptor-like serine/threonine-protein kinase RPK2                                 |
| TCONS_00031870 | 0.478479 | 1.2875     | -0.770967  | BGIOSGA023892 | XP_006661644.1 alcohol dehydrogenase-like 4                                                           |
| TCONS_00018060 | 0.478647 | 0.852979   | 1.20465    | BGIOSGA020108 | XP_015693020.1PREDICTED: uncharacterized protein LOC102714291                                         |
| TCONS_00011415 | 0.478732 | -0.393736  | 0.344224   | BGIOSGA033410 | XP_006650955.1 branched-chain-amino-acid aminotransferase 5, chloroplactic-like                       |
| TCONS_00034114 | 0.478802 | 0.948395   | 0.391539   | BGIOSGA017337 | XP_006664264.1 protein transport protein Sec61 subunit beta                                           |
| TCONS_00025370 | 0.478911 | 0.141306   | 0.814303   | BGIOSGA024060 | XP_006657861.1PREDICTED: uncharacterized protein LOC102708909                                         |
| TCONS_00029505 | 0.479311 | 0.844857   | -0.0129554 | BGIOSGA031259 | XP_003576836.1transcription termination factor MTERF2, chloroplactic                                  |
| TCONS_00029900 | 0.479325 | 0.687555   | 1.1899     | BGIOSGA037321 | XP_004956642.1probable protein arginine N-methyltransferase 1                                         |
| TCONS_00020133 | 0.479335 | 0.551774   | -0.446245  | BGIOSGA032149 | XP_006655796.1 profilin LP04                                                                          |
| TCONS_00029243 | 0.479355 | 0.471649   | -0.75003   | BGIOSGA015776 | XP_015696656.1 wall-associated receptor kinase 3-like                                                 |
| TCONS_00014739 | 0.479372 | -1.24621   | -0.385051  | BGIOSGA016916 | XP_006652639.1PREDICTED: uncharacterized protein LOC102720977                                         |
| TCONS_00009462 | 0.479506 | 1.25629    | 0.560801   | BGIOSGA012009 | XP_020400923.1DDB1- and CUL4-associated factor 8 isoform X1                                           |
| TCONS_00004736 | 0.479522 | -0.0442182 | -0.166896  | BGIOSGA009780 | XP_006645027.2 alpha-glucan phosphorylase, H isozyme                                                  |
| TCONS_00015071 | 0.479615 | 0.144219   | -0.0193953 | BGIOSGA031869 | XP_004977052.1protein COFACTOR ASSEMBLY OF COMPLEX C SUBUNIT B CCB4, chloroplactic isoform X1         |
| TCONS_00004405 | 0.479967 | 0.0374416  | -0.0444913 | BGIOSGA020190 | XP_006644715.1 28 kDa heat- and acid-stable phosphoprotein                                            |
| TCONS_00019195 | 0.479992 | 0.819837   | 0.608      | BGIOSGA018155 | XP_006655262.1 conserved oligomeric Golgi complex subunit 5                                           |
| TCONS_00002621 | 0.480014 | 1.21008    | #N/A       | BGIOSGA019022 | XP_015691648.1 transcription initiation factor IIA subunit 2-like                                     |
| TCONS_00000746 | 0.480014 | #N/A       | -0.933393  | BGIOSGA037323 | XP_006644113.1PREDICTED: uncharacterized protein LOC102703072                                         |
| TCONS_00001353 | 0.480074 | -0.301979  | 0.836267   | BGIOSGA003985 | XP_006644364.1PREDICTED: uncharacterized protein LOC102709035                                         |
| TCONS_00009123 | 0.480089 | 0.0154533  | 1.01837    | BGIOSGA016876 | XP_006650944.1 deSI-like protein At4g17486 isoform X1                                                 |



transcriptome

|                |          |           |           |               |                                                                                                |
|----------------|----------|-----------|-----------|---------------|------------------------------------------------------------------------------------------------|
| TCONS_00033201 | 0.480214 | 0.932034  | 0.607454  | BGIOSGA034264 | XP_006662838.2 disease resistance protein RPM1-like                                            |
| TCONS_00014549 | 0.480253 | -1.03962  | 0.128437  | BGIOSGA029754 | XP_004976128.1 uncharacterized protein LOC101782624                                            |
| TCONS_00025913 | 0.480432 | 0.520867  | 0.795416  | BGIOSGA027513 | XP_006659107.1 tyrosine-tRNA ligase 1, cytoplasmic-like                                        |
| TCONS_00002472 | 0.481051 | 0.230311  | 0.515682  | BGIOSGA005116 | XP_006646650.2 PREDICTED: uncharacterized protein LOC102721046                                 |
| TCONS_00003182 | 0.481428 | 0.667618  | -0.33193  | BGIOSGA034240 | XP_015699268.1 probable transcription factor GLK2                                              |
| TCONS_00021743 | 0.481796 | 1.20659   | 0.22723   | BGIOSGA021778 | XP_002437966.1 protein RTF2 homolog                                                            |
| TCONS_00016299 | 0.481862 | 1.34431   | 0.711298  | BGIOSGA026016 | XP_006652551.1 probable polyol transporter 4                                                   |
| TCONS_00020643 | 0.481865 | 1.1925    | 0.854529  | BGIOSGA020042 | XP_006656045.1 target of Myb protein 1-like                                                    |
| TCONS_00037033 | 0.481883 | 0.46986   | 0.646486  | BGIOSGA036343 | XP_006663959.2 SAGA-associated factor 29-like                                                  |
| TCONS_00013613 | 0.482189 | 0.538811  | 0.833741  | BGIOSGA005307 | XP_004954520.1 large ribosomal RNA subunit accumulation protein YCED homolog 1, chloroplastic  |
| TCONS_00005508 | 0.482506 | 0.334183  | 0.793699  | BGIOSGA007622 | XP_006648352.2 porphobilinogen deaminase, chloroplastic                                        |
| TCONS_00004116 | 0.482518 | 0.216371  | 0.368972  | BGIOSGA020381 | XP_008374426.1 iron-sulfur cluster assembly protein 1-like                                     |
| TCONS_00021088 | 0.482764 | -1.16734  | 0.800574  | BGIOSGA023316 | NP_001183612.1 uncharacterized LOC100502206                                                    |
| TCONS_00019501 | 0.482781 | #NA       | -1.94024  | BGIOSGA017856 | XP_015692780.1 thioredoxin H5-like isoform X1                                                  |
| TCONS_00004024 | 0.482914 | -0.697802 | 1.67678   | BGIOSGA001170 | XP_015693095.1 cytochrome P450 72A14-like                                                      |
| TCONS_00009849 | 0.483007 | -0.302588 | 0.162759  | BGIOSGA012399 | XP_006649911.2 mitochondrial succinate-fumarate transporter 1                                  |
| TCONS_00035417 | 0.483083 | 0.633894  | 0.396544  | BGIOSGA023635 | XP_006663134.1 transcription elongation factor B polypeptide 1                                 |
| TCONS_00017900 | 0.483165 | 1.14916   | 0.108898  | BGIOSGA002929 | XP_006654480.1 60S acidic ribosomal protein P2B-like                                           |
| TCONS_00019804 | 0.483287 | -1.38554  | -2.27848  | BGIOSGA001130 | XP_006654799.1 mitogen-activated protein kinase 7                                              |
| TCONS_00019896 | 0.483665 | -0.358546 | 0.63615   | BGIOSGA017466 | XP_006654856.1 PREDICTED: uncharacterized protein LOC102719114                                 |
| TCONS_00037367 | 0.483808 | 0.938919  | 1.24408   | BGIOSGA023855 | NP_001150742.1 ribosomal protein S6 containing protein                                         |
| TCONS_00003358 | 0.483829 | 1.15912   | 0.447947  | BGIOSGA007733 | XP_006644082.1 putative L-cysteine desulfhydrase 1                                             |
| TCONS_00010013 | 0.484025 | -0.168923 | -0.562446 | BGIOSGA010797 | XP_006650040.1 eukaryotic translation initiation factor 2 subunit beta                         |
| TCONS_00032189 | 0.484281 | -2.37949  | -0.943946 | BGIOSGA000252 | XP_003558726.1 uncharacterized protein LOC100827106                                            |
| TCONS_00032790 | 0.484281 | 0.0566046 | -0.100671 | BGIOSGA031322 | XP_006662110.1 probable NADH dehydrogenase [ubiquinone] 1 alpha subcomplex subunit 12          |
| TCONS_00018235 | 0.484404 | -0.69653  | 1.02912   | BGIOSGA030434 | XP_006654730.1 probable polygalacturonase At1g80170 isoform X2                                 |
| TCONS_00011188 | 0.48465  | 0.930164  | 0.274259  | BGIOSGA016994 | XP_006650768.1 calcium-dependent protein kinase 32-like                                        |
| TCONS_00019559 | 0.484788 | -0.301191 | -0.767097 | BGIOSGA007623 | XP_006654593.1 phosphoglycerate kinase, chloroplastic                                          |
| TCONS_00002433 | 0.484911 | 0.483959  | 0.254714  | BGIOSGA036535 | XP_015690794.1 squamosa promoter-binding-like protein 2                                        |
| TCONS_00023102 | 0.485575 | -1.32203  | -2.38733  | BGIOSGA025136 | XP_006657436.1 uncharacterized oxidoreductase At1g06690, chloroplastic-like isoform X2         |
| TCONS_00027258 | 0.485662 | 0.593177  | 0.202666  | BGIOSGA022657 | XP_015695950.1 zinc finger protein CONSTANS-LIKE 4                                             |
| TCONS_00010159 | 0.485788 | 0.93578   | 0.848243  | BGIOSGA026028 | XP_015689911.1 PREDICTED: uncharacterized protein LOC102715002                                 |
| TCONS_00021799 | 0.48582  | -1.15025  | -0.750953 | BGIOSGA002188 | NP_001142987.2 uncharacterized protein LOC100275448                                            |
| TCONS_00029149 | 0.48613  | 0.14481   | -0.684495 | BGIOSGA005551 | XP_015696857.1 bZIP transcription factor TRAB1-like                                            |
| TCONS_00024579 | 0.48632  | 0.743602  | 0.288478  | BGIOSGA001476 | XP_006657449.2 PREDICTED: uncharacterized protein LOC102708350                                 |
| TCONS_00029190 | 0.486378 | -0.497229 | 0.199598  | BGIOSGA026780 | XP_006660723.1 PREDICTED: uncharacterized protein LOC102720456                                 |
| TCONS_00019329 | 0.486984 | -2.48666  | -0.280674 | BGIOSGA015184 | XP_006654430.1 UDP-glucuronate:xylan alpha-glucuronosyltransferase 1-like                      |
| TCONS_00008443 | 0.487326 | 0.177649  | 0.439238  | BGIOSGA008057 | XP_006647563.1 PREDICTED: uncharacterized protein LOC102699931                                 |
| TCONS_00006331 | 0.487737 | 0.424212  | #NA       | BGIOSGA016549 | XP_006647418.1 MADS-box transcription factor 27                                                |
| TCONS_00022412 | 0.487768 | 0.203983  | 0.238233  | BGIOSGA019568 | XP_006660340.1 solute carrier family 35 member F1-like                                         |
| TCONS_00022645 | 0.487837 | 0.0843033 | 0.68739   | BGIOSGA000720 | XP_006656292.1 phosphoenolpyruvate phosphatase                                                 |
| TCONS_00019310 | 0.488087 | 0.161513  | -0.11438  | BGIOSGA018036 | XP_008656278.1 uncharacterized protein LOC103635650                                            |
| TCONS_00000995 | 0.48821  | 0.521797  | 0.921725  | BGIOSGA003594 | XP_015688764.1 tyrosine-tRNA ligase, chloroplastic/mitochondrial                               |
| TCONS_00012889 | 0.488294 | 0.556583  | 0.133323  | BGIOSGA004522 | XP_006651667.2 regulatory protein NPR4-like                                                    |
| TCONS_00011157 | 0.4885   | 0.840227  | 0.272413  | BGIOSGA006317 | XP_006651928.1 exocyst complex component EXO84B-like                                           |
| TCONS_00034163 | 0.488863 | -0.296873 | 0.568188  | BGIOSGA040457 | XP_006664874.2 biogenesis of lysosome-related organelles complex 1 subunit 1-like              |
| TCONS_00018881 | 0.489196 | 0.824928  | 1.00127   | BGIOSGA027518 | XP_004960657.1 lactoylglutathione lyase GLX1                                                   |
| TCONS_00012197 | 0.489325 | 0.136056  | 0.746136  | BGIOSGA017838 | XP_006650029.1 probable galacturonosyltransferase 7                                            |
| TCONS_00012252 | 0.489371 | 1.14892   | 0.555174  | BGIOSGA010753 | XP_004984415.1 ATP-dependent Clp protease proteolytic subunit-related protein 3, chloroplastic |

transcriptome

|                |          |            |            |               |                                                                                                                                      |
|----------------|----------|------------|------------|---------------|--------------------------------------------------------------------------------------------------------------------------------------|
| TCONS_00003924 | 0.489436 | 0.227188   | 0.266612   | BGIOSGA020252 | NP_001278722.1hydrogen-transporting ATP synthase, rotational mechanism<br>XP_004969131.1protein ANTI-SILENCING 1 isoform X1          |
| TCONS_00001339 | 0.489496 | 0.051324   | 1.20335    | BGIOSGA003971 |                                                                                                                                      |
| TCONS_00019506 | 0.489566 | 0.784837   | 1.77982    | #N/A          |                                                                                                                                      |
| TCONS_00007821 | 0.489567 | 1.45126    | 1.1395     | BGIOSGA020255 | #N/A<br>XP_006647183.2PREDICTED: uncharacterized protein At4g37920, chloroplastic                                                    |
| TCONS_00025182 | 0.489914 | 0.101147   | 0.0919199  | BGIOSGA014972 | XP_015695135.1 tRNA wybutosine-synthesizing protein 2/3/4                                                                            |
| TCONS_00005659 | 0.490122 | 0.828695   | 0.232757   | BGIOSGA007781 | XP_006650973.1 kinesin-II 85 kDa subunit<br>XP_010060731.1PREDICTED: uncharacterized protein LOC104448575                            |
| TCONS_00021627 | 0.490337 | -0.518144  | -0.17428   | BGIOSGA021890 | XP_015689144.1 CAX-interacting protein 4 isoform X2                                                                                  |
| TCONS_00007419 | 0.490391 | 0.10665    | 1.20447    | BGIOSGA009211 | XP_006649501.1 protein TIFY 11c-like                                                                                                 |
| TCONS_00009433 | 0.490461 | 0.535318   | 0.18553    | BGIOSGA029357 | XP_004958389.1uncharacterized protein LOC101762384                                                                                   |
| TCONS_00025557 | 0.491203 | 0.117718   | 0.272855   | BGIOSGA023876 | XP_006650577.1PREDICTED: uncharacterized protein LOC102715832                                                                        |
| TCONS_00010949 | 0.491406 | 1.96271    | 0.962239   | BGIOSGA013551 | XP_006644181.1PREDICTED: uncharacterized protein LOC102699722                                                                        |
| TCONS_00003590 | 0.491427 | 0.00514822 | 0.849648   | BGIOSGA035493 | XP_006643895.1 heme-binding protein 2-like                                                                                           |
| TCONS_00003076 | 0.491777 | 1.17558    | -1.00505   | BGIOSGA002145 | XP_006661925.1 membrane steroid-binding protein 1-like                                                                               |
| TCONS_00032517 | 0.492139 | 0.163369   | -0.282911  | BGIOSGA002021 | XP_006643744.1PREDICTED: uncharacterized protein At2g39795, mitochondrial-like                                                       |
| TCONS_00002802 | 0.492276 | 0.78857    | 1.63001    | BGIOSGA002414 | XP_006650497.1 GPN-loop GTPase 3                                                                                                     |
| TCONS_00012227 | 0.492527 | 0.438219   | 0.737409   | BGIOSGA010782 | XP_006662925.1 adenosylhomocysteinase                                                                                                |
| TCONS_00034820 | 0.493081 | 0.579384   | 0.536612   | BGIOSGA034046 | XP_004956778.1probable ubiquitin receptor RAD23                                                                                      |
| TCONS_00028974 | 0.493264 | -0.0390025 | 0.387033   | BGIOSGA008172 | XP_015693162.1 serine/threonine-protein kinase Nek4 isoform X1                                                                       |
| TCONS_00017888 | 0.493355 | -0.275216  | 0.632312   | BGIOSGA035880 |                                                                                                                                      |
| TCONS_00018996 | 0.493423 | 1.07017    | 1.20299    | #N/A          |                                                                                                                                      |
| TCONS_00030309 | 0.493461 | -3.99374   | -2.47712   | BGIOSGA028477 | XP_002462614.2cytochrome b561 and DOMON domain-containing protein At3g25290<br>XP_002441416.1anthocyanidin 5,3-O-glucosyltransferase |
| TCONS_00030246 | 0.493534 | -0.175604  | -0.0976391 | BGIOSGA032130 | XP_006660850.1PREDICTED: uncharacterized protein LOC102711458                                                                        |
| TCONS_00010718 | 0.493711 | 0.645728   | -0.168264  | BGIOSGA013342 | XP_006644823.1PREDICTED: uncharacterized protein LOC102703077 isoform X1                                                             |
| TCONS_00001952 | 0.493926 | 0.639937   | -0.0296036 | BGIOSGA024187 | XP_006657966.1 probable calcium-binding protein CML13                                                                                |
| TCONS_00024116 | 0.494301 | -0.972094  | -0.165194  | BGIOSGA032014 | XP_004961152.1ketol-acid reductoisomerase, chloroplastic                                                                             |
| TCONS_00019838 | 0.49442  | 1.14048    | 1.00882    | BGIOSGA017519 | NP_001152422.1catalytic/ hydrolase                                                                                                   |
| TCONS_00011668 | 0.494526 | -4.21456   | -1.93742   | BGIOSGA005806 | XP_002456695.1protein YIPF6 homolog                                                                                                  |
| TCONS_00019366 | 0.494617 | 1.14145    | 1.28764    | BGIOSGA004872 | XP_006653879.1PREDICTED: uncharacterized protein LOC102705906                                                                        |
| TCONS_00016874 | 0.494977 | -0.329419  | 0.291115   | BGIOSGA009826 | XP_015691488.1 CRM-domain containing factor CFM2, chloroplastic                                                                      |
| TCONS_00016036 | 0.495076 | 0.0499967  | 0.626477   | BGIOSGA015943 | XP_006652716.1 alpha-1,3/1,6-mannosyltransferase ALG2                                                                                |
| TCONS_00014841 | 0.495237 | 0.43178    | 1.07553    | BGIOSGA017016 | XP_015698710.1 stromal 70 kDa heat shock-related protein, chloroplastic-like                                                         |
| TCONS_00035815 | 0.495351 | 1.24087    | 1.12186    | BGIOSGA035736 | XP_006650113.1PREDICTED: uncharacterized protein LOC102720777                                                                        |
| TCONS_00010134 | 0.495377 | -0.298094  | 0.282857   | BGIOSGA023835 | XP_002456408.1lipoyl synthase, chloroplastic                                                                                         |
| TCONS_00001891 | 0.495395 | 0.484785   | 0.495807   | BGIOSGA014980 | XP_004954249.1uncharacterized protein LOC101761145                                                                                   |
| TCONS_00007036 | 0.495519 | 1.98345    | 0.612703   | BGIOSGA005425 | XP_004961693.1NADH--cytochrome b5 reductase 1                                                                                        |
| TCONS_00018037 | 0.495608 | 0.678294   | 1.63984    | BGIOSGA020084 | XP_006659877.1PREDICTED: uncharacterized protein At2g17340-like                                                                      |
| TCONS_00020623 | 0.495627 | 0.193456   | -0.282987  | BGIOSGA022807 | XP_009410447.1 CBL-interacting protein kinase 32 isoform X3                                                                          |
| TCONS_00032910 | 0.495783 | -0.0729774 | -0.542826  | BGIOSGA011542 | XP_006647504.1 temperature-induced lipocalin-1-like                                                                                  |
| TCONS_00008369 | 0.495901 | 2.15523    | 0.308809   | BGIOSGA037106 | NP_001149706.2MFP1 attachment factor 1                                                                                               |
| TCONS_00009540 | 0.495935 | -0.276582  | -0.236349  | BGIOSGA012086 | XP_015688816.1PREDICTED: uncharacterized protein LOC102718147 isoform X2                                                             |
| TCONS_00008844 | 0.496079 | 0.868641   | 0.89242    | BGIOSGA022548 | XP_006657482.1 probable polyribonucleotide nucleotidyltransferase 1, chloroplastic                                                   |
| TCONS_00024635 | 0.496563 | 0.88711    | 1.0994     | BGIOSGA024246 | XP_015688923.1PREDICTED: uncharacterized protein LOC102715734                                                                        |
| TCONS_00008935 | 0.49672  | 1.65145    | 0.978897   | BGIOSGA005472 | XP_003575177.1trihelix transcription factor ASIL1                                                                                    |
| TCONS_00008202 | 0.496763 | 1.42596    | 1.51504    | BGIOSGA000906 | XP_006649709.1 translocase of chloroplast 34, chloroplastic                                                                          |
| TCONS_00011868 | 0.496803 | 0.208916   | 1.04156    | BGIOSGA011141 | XP_006647673.1 probable serine/threonine-protein kinase WNK4 isoform X1                                                              |
| TCONS_00008566 | 0.496945 | -0.340222  | 0.0584755  | BGIOSGA025983 | XP_006659365.1 probable transmembrane ascorbate ferrereductase 2                                                                     |
| TCONS_00026524 | 0.496972 | 0.830762   | 0.254279   | BGIOSGA025905 |                                                                                                                                      |
| TCONS_00001762 | 0.497303 | 0.95723    | 0.923152   | BGIOSGA012180 | XP_006644662.1 GTP-binding protein At2g22870<br>XP_006644954.2 probable phytoI kinase 2, chloroplastic                               |
| TCONS_00004667 | 0.497422 | -0.37049   | 0.249384   | BGIOSGA000549 | XP_012702173.1G-type lectin S-receptor-like serine/threonine-protein kinase At2g19130                                                |
| TCONS_00014239 | 0.497434 | 1.01569    | 1.09977    | BGIOSGA016402 | XP_006664570.1 cell division topological specificity factor homolog, chloroplastic                                                   |
| TCONS_00037221 | 0.497737 | 0.217      | 0.691143   | BGIOSGA036154 | XP_012698159.1DEXH-box ATP-dependent RNA helicase DEXH1 isoform X1                                                                   |
| TCONS_00032409 | 0.497947 | 1.00353    | 0.804132   | BGIOSGA022792 |                                                                                                                                      |
| TCONS_00021129 | 0.498181 | 0.152506   | 1.30608    | BGIOSGA022181 | XP_002436816.1ent-isokaurene C2-hydroxylase                                                                                          |

## transcriptome

|                |          |            |           |               |                                                                                                   |
|----------------|----------|------------|-----------|---------------|---------------------------------------------------------------------------------------------------|
| TCONS_00025554 | 0.498276 | 0.890655   | 0.605717  | BGIOSGA006937 | XP_020396135.150S ribosomal protein L12-2 isoform X1                                              |
| TCONS_00005433 | 0.498276 | 1.30569    | 1.72119   | BGIOSGA015308 | XP_010240005.1probable inactive ATP-dependent zinc metalloprotease FTSH1 3, chloroplastic         |
| TCONS_00034716 | 0.498504 | -0.220387  | 0.678159  | BGIOSGA000313 | XP_006662885.1 protein RecA-like                                                                  |
| TCONS_00000273 | 0.498788 | -0.429393  | -0.24755  | BGIOSGA002852 | XP_015692433.1 proactivator polypeptide-like 1                                                    |
| TCONS_00025239 | 0.498999 | -0.019897  | 0.468644  | BGIOSGA006556 | XP_006657790.1 glycerol-3-phosphate acyltransferase 3                                             |
| TCONS_00010805 | 0.499163 | 0.614345   | 0.0501283 | BGIOSGA028862 | XP_015690686.1 14-3-3-like protein GF14-F                                                         |
| TCONS_00020123 | 0.499305 | 1.11625    | 0.720215  | BGIOSGA017653 | XP_006656640.2 nucleosome assembly protein 1;1                                                    |
| TCONS_00014817 | 0.499318 | -2.39598   | 1.03801   | BGIOSGA029505 | XP_015691796.1PREDICTED: uncharacterized protein LOC102714284                                     |
| TCONS_00024001 | 0.499464 | 0.549938   | 0.862499  | BGIOSGA026036 | XP_006657898.2 SUMO-activating enzyme subunit 2                                                   |
| TCONS_00024099 | 0.499474 | 1.65975    | -0.954717 | BGIOSGA007437 | XP_021308118.1membrane protein PTM1 isoform X2                                                    |
| TCONS_00027919 | 0.499809 | -0.479785  | -0.205868 | BGIOSGA027073 | XP_006659348.1 actin-related protein 2                                                            |
| TCONS_00007027 | 0.49984  | 0.725167   | 0.744385  | BGIOSGA009209 | XP_006648055.2 aspartate aminotransferase, chloroplastic                                          |
| TCONS_00016785 | 0.500156 | 0.709069   | -0.113518 | BGIOSGA009926 | XP_015692095.1 glutamine synthetase, chloroplastic                                                |
| TCONS_00028213 | 0.500262 | 0.96862    | -1.30648  | BGIOSGA026771 | XP_003574671.1haloacid dehalogenase-like hydrolase domain-containing protein At4g39970 isoform X3 |
| TCONS_00011655 | 0.500403 | 1.11543    | 1.16872   | BGIOSGA011354 | XP_006649486.1 adenylosuccinate synthetase, chloroplastic                                         |
| TCONS_00030514 | 0.500411 | -0.968209  | -0.133905 | BGIOSGA029293 | XP_006660958.1 protein ACCUMULATION AND REPLICATION OF CHLOROPLASTS 3 isoform X1                  |
| TCONS_00035447 | 0.500795 | 0.886697   | 1.11793   | BGIOSGA034658 | XP_006663150.1 F-box/LRR-repeat protein 3-like                                                    |
| TCONS_00028567 | 0.501065 | -0.398085  | 0.821041  | #N/A          | #N/A                                                                                              |
| TCONS_00014715 | 0.501629 | 1.43457    | 1.20173   | BGIOSGA016889 | XP_006652614.1 T-complex protein 1 subunit alpha                                                  |
| TCONS_00019868 | 0.501701 | -0.0769357 | -0.987919 | BGIOSGA017545 | NP_001132742.1uncharacterized protein LOC100194229                                                |
| TCONS_00026235 | 0.501735 | 1.16709    | 0.849253  | BGIOSGA028312 | XP_015695543.1 preprotein translocase subunit SECY, chloroplastic                                 |
| TCONS_00021198 | 0.501752 | -0.0857354 | 1.27225   | BGIOSGA023417 | XP_015694444.1 diphthamide biosynthesis protein 3                                                 |
| TCONS_00004503 | 0.501953 | 0.475922   | 1.17592   | BGIOSGA000717 | XP_015694747.1 ultraviolet-B receptor UVR8 isoform X2                                             |
| TCONS_00028513 | 0.501958 | 0.0770611  | 0.54723   | BGIOSGA030267 | XP_004956278.1PRKR-interacting protein 1                                                          |
| TCONS_00036311 | 0.501998 | -2.39923   | 0.333261  | BGIOSGA036124 | XP_002442393.1uncharacterized protein LOC8068140                                                  |
| TCONS_00030379 | 0.502149 | 0.399264   | 0.756217  | BGIOSGA029419 | XP_006660858.1 ATPase ASNA1 homolog                                                               |
| TCONS_00017631 | 0.502188 | 0.922463   | 1.33278   | BGIOSGA003358 | XP_008649526.1E3 ubiquitin-protein ligase EL5                                                     |
| TCONS_00012284 | 0.502251 | -2.44607   | -2.27845  | BGIOSGA010721 | XP_006651386.1 protein TIC 62, chloroplastic                                                      |
| TCONS_00024283 | 0.502311 | 0.90974    | 1.38507   | BGIOSGA000386 | XP_006658928.2 putative pentatricopeptide repeat-containing protein At5g40405                     |
| TCONS_00013177 | 0.502577 | 0.793965   | 0.540195  | BGIOSGA009807 | XP_002463874.1serine/threonine-protein kinase TOUSLED isoform X2                                  |
| TCONS_00000629 | 0.502641 | -1.81506   | -0.182932 | BGIOSGA006481 | XP_003565628.1E3 ubiquitin-protein ligase EL5                                                     |
| TCONS_00006656 | 0.503025 | 1.51973    | 1.18918   | BGIOSGA008825 | XP_006647695.2PREDICTED: uncharacterized protein LOC102715823, partial                            |
| TCONS_00016264 | 0.503059 | 0.329709   | 1.10787   | BGIOSGA014709 | XP_015692336.1 protein root UVB sensitive 2, chloroplastic isoform X1                             |
| TCONS_00005497 | 0.503142 | 0.921276   | 0.330377  | #N/A          | #N/A                                                                                              |
| TCONS_00006199 | 0.503529 | 0.183825   | 1.1774    | BGIOSGA000447 | XP_010236802.1uncharacterized protein LOC104584271                                                |
| TCONS_00034609 | 0.50375  | 1.71406    | 0.328847  | BGIOSGA006609 | XP_012701223.1uncharacterized protein LOC101785537                                                |
| TCONS_00012666 | 0.503882 | -0.243054  | -0.401185 | BGIOSGA010294 | XP_010938821.2 disease resistance protein RGA2-like                                               |
| TCONS_00005443 | 0.503943 | 0.207809   | 0.614487  | BGIOSGA007550 | XP_015689028.1 disease resistance protein RGA2-like                                               |
| TCONS_00029532 | 0.504274 | 0.86068    | 0.600187  | BGIOSGA015161 | XP_002459830.1flagellar radial spoke protein 5 isoform X1                                         |
| TCONS_00033574 | 0.504296 | 1.80735    | 2.8129    | BGIOSGA035367 | XP_004979379.1uncharacterized protein LOC101754431                                                |
| TCONS_00033267 | 0.50458  | -0.170165  | 0.0685272 | BGIOSGA026623 | XP_006663352.1 dehydrogenase/reductase SDR family member 7                                        |
| TCONS_00024960 | 0.504635 | 1.10921    | 1.63453   | BGIOSGA006759 | NP_001149286.1spermidine synthase 1                                                               |
| TCONS_00009002 | 0.50472  | 0.67155    | 0.0305344 | BGIOSGA005405 | XP_015689552.1PREDICTED: uncharacterized protein slr1919                                          |
| TCONS_00008702 | 0.50476  | 0.330005   | 0.363198  | BGIOSGA005728 | XP_006647800.1 60S ribosomal protein L31                                                          |
| TCONS_00036154 | 0.505048 | 0.488432   | 0.923459  | BGIOSGA037510 | XP_021313664.1phenylalanine-tRNA ligase, chloroplastic/mitochondrial                              |
| TCONS_00016896 | 0.505507 | 1.04949    | 0.199934  | BGIOSGA014066 | XP_006653893.2 DNA mismatch repair protein MSH3                                                   |
| TCONS_00032406 | 0.505572 | 0.12691    | 0.996331  | BGIOSGA020171 | XP_006661853.2 DEXH-box ATP-dependent RNA helicase DEXH1                                          |
| TCONS_00022909 | 0.505603 | -1.08183   | -0.997733 | BGIOSGA026221 | XP_006656488.1 novel plant SNARE 11                                                               |
| TCONS_00037191 | 0.505665 | 1.53584    | 1.72314   | BGIOSGA002555 | XP_015698497.1 iron-sulfur assembly protein IscA-like 1, mitochondrial                            |
| TCONS_00015276 | 0.505865 | 0.614609   | 1.09863   | BGIOSGA015707 | XP_006652081.1 tRNA (adenine(58)-N(1))-methyltransferase non-catalytic subunit trm6               |
| TCONS_00002103 | 0.505892 | 1.64027    | 0.460978  | BGIOSGA018226 | NP_001151099.3electron transporter                                                                |
| TCONS_00000256 | 0.506029 | 0.1537     | 0.0407318 | BGIOSGA019238 | XP_015693112.1 putative transcription factor bHLH107                                              |
| TCONS_00034934 | 0.506068 | 0.593781   | 0.833431  | BGIOSGA009088 | XP_015698141.1 transport inhibitor response 1-like protein Os11g0515500                           |

## transcriptome

|                |          |            |            |               |                                                                                                                 |
|----------------|----------|------------|------------|---------------|-----------------------------------------------------------------------------------------------------------------|
| TCONS_00007055 | 0.506248 | 1.40278    | 1.0551     | BGIOSGA009238 | XP_003570348.1proliferating cell nuclear antigen<br>XP_003567596.1putative methyltransferase                    |
| TCONS_00003413 | 0.506416 | 2.9315     | 0.678309   | BGIOSGA007337 | DDB_G0268948<br>XP_006661187.1 DEAD-box ATP-dependent                                                           |
| TCONS_00028930 | 0.506799 | 1.02485    | 0.641547   | BGIOSGA029835 | RNA helicase 22<br>XP_006662757.1 disease resistance protein                                                    |
| TCONS_00033022 | 0.50688  | -0.668407  | -1.00092   | BGIOSGA034868 | RGA2-like<br>XP_006654374.1 UPF0603 protein                                                                     |
| TCONS_00019258 | 0.507214 | 0.200269   | -0.530322  | BGIOSGA025293 | Os05g0401100, chloroplastic                                                                                     |
| TCONS_00017410 | 0.50736  | 1.54822    | 2.48974    | BGIOSGA015304 | XP_006654194.1 xylanase inhibitor protein 2-like                                                                |
| TCONS_00003875 | 0.507696 | 0.939372   | 1.91988    | BGIOSGA001337 | XP_006646036.1 UB1-associated proteins 1C<br>XP_006650666.1 malate dehydrogenase,                               |
| TCONS_00013249 | 0.507806 | 0.198288   | -0.370421  | BGIOSGA004733 | glyoxysomal-like                                                                                                |
| TCONS_00020954 | 0.507811 | 0.915381   | -2.00324   | BGIOSGA013519 | XP_006656195.1 syntaxin-125-like<br>XP_020409078.1putative DJF593 domain                                        |
| TCONS_00015606 | 0.50845  | -0.0272104 | 0.740598   | BGIOSGA031963 | containing family protein isoform X1<br>XP_006650631.2 protein arginine N-                                      |
| TCONS_00013215 | 0.508496 | 1.73555    | 1.36429    | BGIOSGA009772 | methyltransferase 2                                                                                             |
| TCONS_00036613 | 0.508673 | 0.530965   | -0.42042   | BGIOSGA036939 | XP_006663786.1 aladin-like<br>XP_006649870.1PREDICTED: uncharacterized                                          |
| TCONS_00005685 | 0.508706 | 1.35598    | -0.413696  | BGIOSGA007807 | protein LOC102720888<br>XP_006659148.1 THO complex subunit 7B-like                                              |
| TCONS_00027392 | 0.508725 | -0.0846496 | 0.618612   | BGIOSGA020395 | isoform X1<br>XP_006647346.2 cysteine and histidine-rich                                                        |
| TCONS_00008128 | 0.508786 | -0.0218745 | 0.605482   | BGIOSGA006308 | domain-containing protein RAR1                                                                                  |
| TCONS_00019441 | 0.509005 | 1.06719    | 0.522304   | BGIOSGA008061 | XP_015692734.1 coatomer subunit zeta-1<br>XP_006663534.1 THUMP domain-containing                                |
| TCONS_00033689 | 0.509147 | 1.14636    | 1.81787    | BGIOSGA035465 | protein 1 homolog                                                                                               |
| TCONS_00018132 | 0.509271 | 0.144153   | 0.545673   | BGIOSGA000812 | XP_006654644.1 auxin response factor 14<br>XP_006650456.1 probable sugar                                        |
| TCONS_00010777 | 0.509356 | 0.141702   | -0.566507  | BGIOSGA013404 | phosphate/phosphate translocator At1g48230<br>XP_006644301.1 heat stress transcription factor                   |
| TCONS_00001173 | 0.509422 | 0.530021   | 1.76535    | BGIOSGA008366 | A-6a<br>XP_004952615.1protein ROOT PRIMORDIUM                                                                   |
| TCONS_00006179 | 0.509642 | 1.44913    | 2.24014    | BGIOSGA031071 | DEFECTIVE 1<br>XP_022681842.1zinc finger CCCH domain-                                                           |
| TCONS_00019928 | 0.509787 | 0.175924   | 0.31378    | BGIOSGA028945 | containing protein 43-like<br>XP_006649968.1 ubiquitin-conjugating enzyme                                       |
| TCONS_00009918 | 0.509832 | 0.231425   | 0.590968   | BGIOSGA012468 | E2 32 isoform X1<br>XP_015695716.1 chloroplast envelope                                                         |
| TCONS_00027582 | 0.510054 | 0.175589   | 1.12635    | BGIOSGA027439 | membrane protein<br>XP_006645307.1 eukaryotic peptide chain                                                     |
| TCONS_00002493 | 0.510165 | 1.17545    | -0.42412   | BGIOSGA019747 | release factor subunit 1-2-like<br>XP_004954806.1NAC domain-containing protein                                  |
| TCONS_00007800 | 0.510165 | 1.56777    | -1.00908   | BGIOSGA029415 | 48<br>XP_006652590.1 SH3 domain-containing protein                                                              |
| TCONS_00016329 | 0.510174 | 0.316741   | 0.697219   | BGIOSGA024244 | 2-like<br>XP_006656484.1 NADH dehydrogenase                                                                     |
| TCONS_00022903 | 0.510276 | -0.875452  | -0.299041  | BGIOSGA020540 | [ubiquinone] 1 beta subcomplex subunit 9<br>XP_006647082.2 mitochondrial substrate carrier                      |
| TCONS_00005701 | 0.510429 | 0.880767   | 1.14854    | BGIOSGA004305 | family protein B-like<br>XP_012699299.17-deoxyloganic acid                                                      |
| TCONS_00025108 | 0.510655 | 1.55335    | -2.01029   | BGIOSGA017693 | glucosyltransferase<br>XP_015689011.1 AT-rich interactive domain-                                               |
| TCONS_00008690 | 0.510683 | 1.19864    | 1.5746     | BGIOSGA004518 | containing protein 3-like                                                                                       |
| TCONS_00010092 | 0.510827 | -1.18795   | 0.863749   | BGIOSGA016833 | XP_015689898.1 protein IQ-DOMAIN 14-like<br>XP_015691377.1 ABC transporter C family                             |
| TCONS_00015452 | 0.510893 | 0.313083   | -0.095889  | BGIOSGA016491 | member 4-like                                                                                                   |
| TCONS_00016904 | 0.510948 | 2.17102    | 1.92824    | BGIOSGA013893 | XP_006653055.1 protein YLS9-like<br>XP_006652874.1 G-type lectin S-receptor-like                                |
| TCONS_00016677 | 0.511215 | 0.0221269  | 0.836319   | BGIOSGA014292 | serine/threonine-protein kinase B120<br>XP_003573789.1glucose-1-phosphate                                       |
| TCONS_00027870 | 0.511235 | -0.685803  | -0.83033   | BGIOSGA024540 | adenyltransferase small subunit,<br>chloroplastic/amyloplastic                                                  |
| TCONS_00025423 | 0.511472 | 1.02625    | 0.972581   | BGIOSGA010486 | XP_004958159.1probable amino-acid<br>acetyltransferase NAGS2, chloroplastic                                     |
| TCONS_00015938 | 0.511519 | -0.498677  | -0.640459  | BGIOSGA006256 | XP_006652315.1 DDT domain-containing protein<br>DDB_G0282237-like                                               |
| TCONS_00025803 | 0.511654 | 0.869597   | 0.575719   | BGIOSGA027870 | NP_001144170.1uncharacterized protein<br>LOC100277025                                                           |
| TCONS_00018981 | 0.511931 | -0.831311  | 1.34571    | #N/A          | XP_015693118.1 tRNA pseudouridine synthase A                                                                    |
| TCONS_00016707 | 0.512559 | -0.303277  | -0.306679  | BGIOSGA014256 | 1 isoform X1<br>XP_015691728.1PREDICTED: uncharacterized                                                        |
| TCONS_00013043 | 0.512569 | 0.646363   | 0.487486   | BGIOSGA029477 | protein LOC102705433 isoform X2<br>XP_015690761.1 serine/threonine-protein kinase                               |
| TCONS_00009862 | 0.512586 | 0.394803   | -0.22656   | BGIOSGA012413 | prp4<br>XP_015690823.1 rab3 GTPase-activating protein                                                           |
| TCONS_00003581 | 0.513734 | 1.05636    | 0.215854   | BGIOSGA025712 | catalytic subunit isoform X2<br>XP_002463987.1asparagine-tRNA ligase,                                           |
| TCONS_00000998 | 0.513957 | 0.338818   | 0.125759   | BGIOSGA003599 | cytoplasmic 1<br>XP_004968811.1uncharacterized PKHD-type                                                        |
| TCONS_00018011 | 0.514018 | 0.221602   | -0.0400386 | BGIOSGA013329 | hydroxylase At1g22950                                                                                           |
| TCONS_00008444 | 0.514149 | 0.804262   | 0.955085   | BGIOSGA036130 | XP_015692429.1 probable acetyltransferase NSI<br>XP_006648860.2 replication protein A 32 kDa                    |
| TCONS_00026138 | 0.514312 | 1.02402    | 0.8573     | BGIOSGA009568 | subunit B-like<br>XP_006659220.1 serine/threonine-protein kinase                                                |
| TCONS_00026995 | 0.514688 | 0.0447102  | -0.0591437 | BGIOSGA036248 | HT1-like<br>XP_006659588.1 sulfite oxidase                                                                      |
| TCONS_00009479 | 0.515044 | 0.987663   | 0.86506    | BGIOSGA012029 | XP_015690978.1 ubiquitin carboxyl-terminal<br>hydrolase 26                                                      |
| TCONS_00035478 | 0.515602 | -1.4886    | -0.229133  | BGIOSGA019678 | XP_015698440.1 2-hydroxy-6-<br>oxononadienedioate/2-hydroxy-6-<br>oxononatrienedioate hydrolase-like isoform X3 |

## transcriptome

|                |          |           |            |               |                                                                                   |
|----------------|----------|-----------|------------|---------------|-----------------------------------------------------------------------------------|
| TCONS_00028263 | 0.516069 | 0.935085  | 1.12323    | BGIOSGA005728 | XP_006659566.1 60S ribosomal protein L31                                          |
| TCONS_00019867 | 0.516372 | 0.420708  | -0.386842  | BGIOSGA020379 | XP_006654835.1 sugar transporter ERD6-like 4                                      |
| TCONS_00011522 | 0.516402 | 0.483673  | -0.0974204 | BGIOSGA036157 | XP_004979720.1GRF1-interacting factor 3                                           |
| TCONS_00015465 | 0.516452 | 0.841231  | 0.934883   | BGIOSGA000592 | XP_006663002.2 pentatricopeptide repeat-containing protein At4g14820-like         |
| TCONS_00027287 | 0.516706 | 1.16069   | -0.148127  | BGIOSGA029320 | XP_010230621.1glycine-rich protein 2                                              |
| TCONS_00022474 | 0.516822 | 1.40665   | 1.92049    | BGIOSGA030840 | XP_006656189.1 probable histone deacetylase 19                                    |
| TCONS_00009689 | 0.517067 | 0.46405   | 0.504977   | BGIOSGA021998 | XP_015690285.1 40S ribosomal protein S20-1-like                                   |
| TCONS_00028461 | 0.517158 | 0.0214522 | -1.60196   | BGIOSGA010497 | XP_006659689.1 probable uridine nucleosidase 1                                    |
| TCONS_00007893 | 0.517221 | -0.78983  | 0.12513    | BGIOSGA006584 | XP_006647219.1 WD repeat-containing protein 25                                    |
| TCONS_00015051 | 0.517241 | 0.997383  | 0.999898   | BGIOSGA017234 | XP_006653817.1 NEDD8 ultimate buster 1                                            |
| TCONS_00010812 | 0.517944 | -0.745562 | -0.309816  | BGIOSGA035876 | XP_006650492.1 ubiquitin-conjugating enzyme E2 variant 1D-like                    |
| TCONS_00024763 | 0.518087 | 0.521548  | 0.618912   | BGIOSGA024614 | XP_015694816.1 pentatricopeptide repeat-containing protein At2g41720              |
| TCONS_00026601 | 0.518427 | -0.495514 | -0.303822  | BGIOSGA030654 | XP_006659395.1PREDICTED: uncharacterized protein LOC102704725                     |
| TCONS_00003332 | 0.518445 | 1.32831   | 1.51116    | BGIOSGA034416 | XP_006644070.1 coatomer subunit beta-2                                            |
| TCONS_00029807 | 0.518575 | 2.11791   | 1.15762    | BGIOSGA002978 | XP_006660531.2 phosphoenolpyruvate carboxylase 2                                  |
| TCONS_00001559 | 0.518604 | 0.469017  | 0.302467   | BGIOSGA005360 | XP_006644512.1 auxin-responsive protein IAA5                                      |
| TCONS_00017371 | 0.518832 | 0.477948  | 0.649629   | BGIOSGA011482 | XP_006654169.2 putative ubiquitin-conjugating enzyme E2 38                        |
| TCONS_00014303 | 0.51889  | 0.275618  | -0.567883  | BGIOSGA008426 | XP_015691466.1PREDICTED: uncharacterized protein LOC102702004, partial            |
| TCONS_00035480 | 0.518928 | 0.838051  | 0.790504   | BGIOSGA034694 | XP_015697819.1 cytochrome P450 714C2-like                                         |
| TCONS_00000583 | 0.519143 | 0.756565  | 1.83263    | BGIOSGA013128 | XP_006644004.2 importin subunit alpha-1a                                          |
| TCONS_00007000 | 0.519171 | 0.0705742 | 1.24507    | BGIOSGA000827 | XP_006648034.1 probable alpha, alpha-trehalose-phosphate synthase [UDP-forming] 8 |
| TCONS_00020185 | 0.519444 | 0.726002  | 1.43218    | #N/A          | #N/A                                                                              |
| TCONS_00029283 | 0.519496 | 0.399848  | 1.37678    | BGIOSGA026689 | XP_002460467.130S ribosomal protein S16-2, chloroplastic/mitochondrial            |
| TCONS_00013034 | 0.519829 | -0.628034 | -0.0229334 | BGIOSGA017877 | XP_006651733.1 phytanoyl-CoA dioxygenase 1                                        |
| TCONS_00016113 | 0.519866 | 1.36035   | 1.52378    | BGIOSGA018595 | XP_006653526.1 cytochrome P450 71A9-like                                          |
| TCONS_00024496 | 0.520532 | 1.3578    | 0.368713   | BGIOSGA024899 | XP_006658243.2 phospholipase A-2-activating protein                               |
| TCONS_00005532 | 0.520772 | -0.307825 | 0.116135   | BGIOSGA007641 | XP_004951749.1succinate-semialdehyde dehydrogenase, mitochondrial                 |
| TCONS_00009566 | 0.520951 | 0.65258   | 0.103707   | BGIOSGA001543 | XP_006644222.1 26S proteasome non-ATPase regulatory subunit 13 homolog B-like     |
| TCONS_00016444 | 0.52096  | 0.0203726 | 0.789098   | BGIOSGA025652 | XP_004976528.1E3 ubiquitin-protein ligase At1g63170                               |
| TCONS_00032525 | 0.521003 | -0.891229 | 0.111771   | BGIOSGA025241 | XP_002466001.1non-specific lipid-transfer protein 2P                              |
| TCONS_00029238 | 0.521258 | 0.131906  | 0.530907   | BGIOSGA026739 | XP_004957142.1WPP domain-interacting protein 2                                    |
| TCONS_00008136 | 0.52179  | 0.0835413 | 0.502174   | BGIOSGA006302 | XP_020396895.1threonine-tRNA ligase, chloroplastic/mitochondrial 2                |
| TCONS_00037485 | 0.521909 | 0.390426  | 0.436279   | BGIOSGA033746 | XP_006664175.1 RNA polymerase II-associated protein 3                             |
| TCONS_00021838 | 0.521951 | 0.300943  | -0.548319  | BGIOSGA021690 | XP_021304637.1tuliposide A-converting enzyme 1, chloroplastic-like                |
| TCONS_00019398 | 0.522026 | 0.83098   | 0.605894   | BGIOSGA017954 | XP_006654483.1 arginyl-tRNA-protein transferase 2-like isoform X1                 |
| TCONS_00010736 | 0.522045 | 0.531878  | -0.939952  | BGIOSGA009870 | XP_015690729.1 plasma membrane ATPase 1-like                                      |
| TCONS_00036039 | 0.522063 | -0.852684 | 0.285835   | BGIOSGA035464 | XP_006664025.1 probable prefoldin subunit 2                                       |
| TCONS_00020124 | 0.522158 | 0.235677  | 0.816325   | BGIOSGA022323 | XP_006655789.1PREDICTED: uncharacterized protein LOC102704065                     |
| TCONS_00019265 | 0.522163 | 1.83573   | 1.6974     | BGIOSGA018085 | XP_003568493.1transcription termination factor MTERF8, chloroplastic              |
| TCONS_00019635 | 0.522216 | 0.130952  | 1.41513    | BGIOSGA014547 | XP_003568092.2gamma-glutamyl hydrolase 2                                          |
| TCONS_00032760 | 0.522348 | 1.15443   | 0.726097   | BGIOSGA018280 | XP_010235028.160S ribosomal export protein NMD3                                   |
| TCONS_00021398 | 0.522422 | 1.27199   | 0.73025    | BGIOSGA023623 | XP_015694212.1 serine/arginine-rich splicing factor SR45a                         |
| TCONS_00033555 | 0.522595 | -1.52505  | -0.542865  | BGIOSGA033912 | XP_006662957.1PREDICTED: uncharacterized protein LOC102721490 isoform X1          |
| TCONS_00035606 | 0.522601 | 1.49728   | 1.69123    | BGIOSGA028075 | XP_006663834.1 mRNA-decapping enzyme-like protein                                 |
| TCONS_00036243 | 0.52266  | -0.172111 | -0.15762   | BGIOSGA029967 | XP_006664106.1PREDICTED: uncharacterized protein LOC102722168                     |
| TCONS_00003936 | 0.523048 | 0.153362  | 0.854803   | BGIOSGA023104 | XP_006644341.1 plasminogen activator inhibitor 1 RNA-binding protein-like         |
| TCONS_00006957 | 0.523139 | 1.01327   | -0.0933224 | BGIOSGA022501 | XP_006648001.1 UMP-CMP kinase 4                                                   |
| TCONS_00009581 | 0.523304 | 0.449908  | 0.510933   | BGIOSGA003092 | XP_024312066.150S ribosomal protein L15, chloroplastic                            |
| TCONS_00006266 | 0.523643 | -1.08468  | -1.7505    | BGIOSGA006257 | XP_003575145.1protein MAINTENANCE OF PSII UNDER HIGH LIGHT 1                      |
| TCONS_00008439 | 0.523862 | 0.854141  | 1.18271    | BGIOSGA031081 | XP_022681476.1wall-associated receptor kinase 5-like isoform X2                   |
| TCONS_00003401 | 0.523887 | 0.856439  | 0.169293   | BGIOSGA018220 | XP_010231510.160S ribosomal protein L29-1                                         |
| TCONS_00011508 | 0.523951 | 1.34931   | 0.909059   | BGIOSGA008592 | XP_004985838.1ubiquitin domain-containing protein DSK2a                           |
| TCONS_00023122 | 0.523963 | 1.84533   | 0.234955   | BGIOSGA030757 | XP_004955459.1probable inositol transporter 2                                     |
| TCONS_00031504 | 0.524006 | 0.307089  | 0.701014   | BGIOSGA005165 | XP_002465034.1probable glutathione S-transferase GSTU6                            |
| TCONS_00025948 | 0.524122 | 0.0430021 | 0.548942   | BGIOSGA033017 | XP_015696151.1 tobamovirus multiplication protein 2A-like                         |
| TCONS_00005558 | 0.524149 | 0.573813  | 1.50948    | BGIOSGA007667 | XP_006646978.1 nucleoid-associated protein At2g24020, chloroplastic-like          |

## transcriptome

|                |          |            |            |               |                                                                                   |
|----------------|----------|------------|------------|---------------|-----------------------------------------------------------------------------------|
| TCONS_00035739 | 0.524215 | -0.475414  | -0.065096  | BGIOSGA037151 | XP_006664422.1 glutathione S-transferase-like                                     |
| TCONS_00011568 | 0.524282 | 0.234807   | 0.633263   | BGIOSGA011447 | XP_006651042.1 protein sister of odd and bowel-like                               |
| TCONS_00004901 | 0.52429  | 0.201777   | 0.552778   | BGIOSGA010495 | XP_006645177.1 PT11-like tyrosine-protein kinase 1                                |
| TCONS_00022176 | 0.524584 | 1.15886    | 0.771475   | BGIOSGA021320 | XP_022681568.1WD repeat-containing protein 7                                      |
| TCONS_00022654 | 0.524613 | -0.302037  | -0.639674  | BGIOSGA026984 | XP_015693426.1 uncharacterized methyltransferase At2g41040, chloroplastic         |
| TCONS_00008411 | 0.52503  | 0.305199   | 0.824478   | BGIOSGA006009 | XP_006647646.1 lysine-tRNA ligase, chloroplastic/mitochondrial                    |
| TCONS_00020283 | 0.525172 | 0.189152   | 0.202889   | BGIOSGA022481 | XP_004964583.1 uncharacterized protein LOC101782131                               |
| TCONS_00030078 | 0.525251 | -1.71468   | -1.37494   | BGIOSGA006377 | XP_006661252.1 WAT1-related protein At4g30420-like                                |
| TCONS_00006688 | 0.525501 | -0.419653  | -0.330323  | BGIOSGA014313 | XP_014756494.1 uncharacterized protein LOC100834713                               |
| TCONS_00003496 | 0.525588 | 1.00224    | -1.12009   | BGIOSGA001706 | XP_004968704.1 glycine, alanine and asparagine-rich protein                       |
| TCONS_00004394 | 0.525595 | 0.440402   | 0.880352   | BGIOSGA009181 | XP_006644707.1 probable alpha, alpha-trehalose-phosphate synthase [UDP-forming] 7 |
| TCONS_00027074 | 0.525725 | 0.976467   | 0.693559   | BGIOSGA036156 | XP_006659662.1 E3 ubiquitin ligase BIG BROTHER-related-like                       |
| TCONS_00006932 | 0.525787 | 0.0501727  | 1.20121    | BGIOSGA014304 | XP_004954045.1 soluble inorganic pyrophosphatase 6, chloroplastic                 |
| TCONS_00011964 | 0.52579  | 1.2961     | 0.951161   | BGIOSGA011046 | XP_006649808.1 cytosolic enolase 3                                                |
| TCONS_00024439 | 0.525995 | -0.357432  | -1.26369   | BGIOSGA040663 | XP_015694502.1 dirigent protein 1-like                                            |
| TCONS_00022542 | 0.526501 | 0.0732218  | -0.300787  | BGIOSGA007737 | XP_015694124.1 probable calcium-binding protein CML21                             |
| TCONS_00009215 | 0.526635 | 0.44114    | 0.0237647  | BGIOSGA014503 | XP_006649299.1 SUMO-conjugating enzyme SCE1                                       |
| TCONS_00006404 | 0.526928 | 1.70458    | 0.271621   | BGIOSGA020719 | XP_015689083.1 glyceraldehyde-3-phosphate dehydrogenase 3, cytosolic              |
| TCONS_00020360 | 0.526948 | -0.406583  | 0.844686   | BGIOSGA022552 | XP_006655914.1 cyclin-D3-1 isoform X1                                             |
| TCONS_00007237 | 0.527199 | 2.80679    | 0.728962   | BGIOSGA004771 | XP_006648229.1 luminal-binding protein 2                                          |
| TCONS_00037522 | 0.527225 | -0.802571  | -0.156304  | BGIOSGA035844 | XP_006664197.1 nuclear transcription factor Y subunit A-7-like isoform X2         |
| TCONS_00021547 | 0.527386 | 0.312011   | -0.0542496 | #N/A          | #N/A                                                                              |
| TCONS_00011228 | 0.527457 | -0.450609  | 0.567637   | BGIOSGA001417 | NP_001141136.1 Ras protein ARA-3                                                  |
| TCONS_00013620 | 0.528089 | -2.85878   | -0.448341  | BGIOSGA015773 | XP_006652084.1 PREDICTED: uncharacterized protein LOC102714366                    |
| TCONS_00006719 | 0.528283 | 2.15187    | -0.110482  | BGIOSGA008888 | XP_003570192.1 universal stress protein PHOS34                                    |
| TCONS_00012748 | 0.528381 | 0.605847   | 0.819426   | BGIOSGA035115 | XP_006650313.1 exocyst complex component SEC3A-like                               |
| TCONS_00012228 | 0.528478 | 0.659973   | -0.131603  | BGIOSGA026364 | XP_006650058.1 60S ribosomal protein L19-1-like                                   |
| TCONS_00016152 | 0.528766 | 0.439123   | 0.407213   | BGIOSGA014823 | XP_015691787.1 protein NRT1/ PTR FAMILY 4.6-like isoform X1                       |
| TCONS_00018231 | 0.529137 | -0.953194  | -0.544092  | BGIOSGA000941 | XP_006654724.2 jacalin-related lectin 19-like isoform X2                          |
| TCONS_00007019 | 0.529213 | -0.994399  | -0.745898  | BGIOSGA022375 | XP_015688756.1 transcription factor bHLH66-like                                   |
| TCONS_00034692 | 0.52952  | 0.0749967  | 0.628152   | BGIOSGA013220 | XP_006647932.1 LMBR1 domain-containing protein 2 homolog A-like isoform X1        |
| TCONS_00023950 | 0.530365 | 0.287087   | 0.922632   | BGIOSGA025982 | XP_008670499.2O-fucosyltransferase 36                                             |
| TCONS_00025788 | 0.530551 | 0.471428   | -0.260631  | BGIOSGA037250 | XP_006665025.1 protein mago nashi homolog                                         |
| TCONS_00033445 | 0.530609 | 0.743252   | -0.0232237 | BGIOSGA017685 | XP_006662933.1 ER lumen protein-retaining receptor                                |
| TCONS_00027069 | 0.530717 | 1.20606    | 0.696851   | BGIOSGA027107 | XP_004974118.1 RNA-binding protein 1                                              |
| TCONS_00026526 | 0.530822 | 0.234858   | 0.638029   | BGIOSGA033737 | XP_004973343.1 probable E3 ubiquitin ligase SUD1                                  |
| TCONS_00030815 | 0.531118 | 0.854872   | 1.6542     | BGIOSGA025777 | XP_004951725.1 ribosomal RNA small subunit methyltransferase                      |
| TCONS_00031477 | 0.531318 | 0.928957   | 1.79323    | BGIOSGA035724 | XP_015697055.1 mitochondrial inner membrane protein OXA1-like                     |
| TCONS_00019278 | 0.531496 | -0.675338  | 0.504806   | BGIOSGA018073 | XP_022681358.1 uncharacterized protein LOC101757009 isoform X5                    |
| TCONS_00001456 | 0.531506 | 0.0039972  | 0.707415   | BGIOSGA004098 | NP_001151674.1 tat pathway signal sequence family protein                         |
| TCONS_00009867 | 0.531549 | -0.0557699 | 1.2434     | BGIOSGA012418 | XP_006651281.1 PREDICTED: uncharacterized protein LOC102717143                    |
| TCONS_00016573 | 0.531773 | -1.90214   | -0.416659  | BGIOSGA006191 | NP_001315062.1 uncharacterized LOC100384454                                       |
| TCONS_00036844 | 0.531793 | 0.384494   | 0.629813   | BGIOSGA008095 | XP_022683630.1 putative methyltransferase At1g22800, mitochondrial                |
| TCONS_00026554 | 0.531803 | 0.00235013 | 0.632376   | BGIOSGA007771 | XP_006659380.2 ABC transporter A family member 7-like                             |
| TCONS_00029415 | 0.532099 | 0.634486   | 0.639741   | BGIOSGA023582 | XP_006660897.1 peptidyl-prolyl cis-trans isomerase CYP21-1                        |
| TCONS_00001014 | 0.532332 | -4.03842   | -1.6227    | BGIOSGA003617 | XP_014754331.1 NRR repressor homolog 1                                            |
| TCONS_00034822 | 0.532408 | -0.743094  | -0.26037   | BGIOSGA034044 | XP_006662927.1 UV-B-induced protein At3g17800, chloroplastic-like                 |
| TCONS_00030929 | 0.532482 | -0.0228558 | 0.147739   | BGIOSGA023536 | XP_015696959.1 protein SNOWY COTYLEDON 3-like                                     |
| TCONS_00006868 | 0.532737 | 0.518717   | 1.14462    | BGIOSGA021617 | NP_001145244.1 uncharacterized LOC100278526                                       |
| TCONS_00020808 | 0.532811 | 0.401123   | -0.321654  | BGIOSGA017219 | XP_006656131.1 PREDICTED: uncharacterized protein LOC102710413                    |
| TCONS_00009543 | 0.532846 | 0.239712   | 0.513132   | BGIOSGA012088 | XP_006651159.1 methionine-tRNA ligase, chloroplastic/mitochondrial                |
| TCONS_00035160 | 0.532992 | -0.195451  | 0.614483   | BGIOSGA019284 | XP_006663038.2 acyl-coenzyme A oxidase 2, peroxisomal                             |
| TCONS_00013062 | 0.533054 | 0.68956    | 0.0627631  | BGIOSGA009922 | XP_006650496.1 binding partner of ACD11 1                                         |
| TCONS_00019309 | 0.53329  | 0.0415631  | -1.04635   | BGIOSGA025413 | XP_006654415.1 KH domain-containing protein At1g09660/At1g09670-like isoform X1   |

## transcriptome

|                |          |            |             |               |                                                                                          |
|----------------|----------|------------|-------------|---------------|------------------------------------------------------------------------------------------|
| TCONS_00035353 | 0.533416 | 0.769218   | 1.5935      | BGIOSGA037637 | XP_010237400.1ribonucleases P/MRP protein subunit POP1                                   |
| TCONS_00011381 | 0.533558 | 1.23081    | 0.434289    | BGIOSGA023995 | XP_006652056.1 DIBOA-glucoside dioxygenase BX6-like                                      |
| TCONS_00002329 | 0.53371  | 0.490197   | 0.780663    | BGIOSGA004970 | XP_006645156.1 15 kDa selenoprotein XP_006643739.1 sulfoquinovosyl transferase SQD2-like |
| TCONS_00000183 | 0.533881 | -0.955163  | -0.590065   | BGIOSGA038774 | XP_006652823.1 lecithin-cholesterol acyltransferase-like 4                               |
| TCONS_00014938 | 0.533887 | 0.94311    | 0.92873     | BGIOSGA032507 | XP_022678727.1 uncharacterized protein LOC111255797                                      |
| TCONS_00032456 | 0.534254 | -0.544616  | -0.00435501 | BGIOSGA031661 | XP_006657346.1 PREDICTED: uncharacterized protein LOC102718850                           |
| TCONS_00021375 | 0.534448 | 2.21508    | 1.11362     | BGIOSGA023603 | NP_001335716.1 uncharacterized LOC100217024                                              |
| TCONS_00024324 | 0.534468 | -2.28185   | 0.236122    | BGIOSGA028726 | XP_002461229.2 ricin B-like lectin R40C1                                                 |
| TCONS_00024367 | 0.534773 | 0.342255   | 1.26284     | BGIOSGA012543 | XP_004982351.1 transcription factor PIF1 isoform X3                                      |
| TCONS_00010582 | 0.534775 | -0.361875  | 0.566808    | BGIOSGA033007 | XP_006654541.1 alanine-glyoxylate aminotransferase 2 homolog 3, mitochondrial-like       |
| TCONS_00019477 | 0.534855 | -0.900394  | 1.15157     | BGIOSGA011956 | XP_006650058.1 60S ribosomal protein L19-1-like                                          |
| TCONS_00012602 | 0.534857 | 0.464376   | -0.220202   | BGIOSGA026364 | XP_015691861.1 BTB/POZ domain-containing protein At1g67900-like                          |
| TCONS_00014445 | 0.534862 | 0.311165   | -1.13326    | BGIOSGA010743 | XP_006662906.1 endonuclease III homolog 1, chloroplastic-like                            |
| TCONS_00033275 | 0.535049 | -0.854723  | -1.16459    | BGIOSGA035099 | XP_006648637.1 type II inositol polyphosphate 5-phosphatase 15-like                      |
| TCONS_00008000 | 0.535082 | 1.18624    | 0.33183     | BGIOSGA029024 | XP_006644613.1 PREDICTED: uncharacterized protein LOC102710920                           |
| TCONS_00001692 | 0.535413 | 1.76207    | 1.50198     | BGIOSGA004326 | XP_006650497.1 GPN-loop GTPase 3                                                         |
| TCONS_00010827 | 0.535708 | 0.297506   | 0.446238    | BGIOSGA010782 | XP_006645343.1 vacuolar protein sorting-associated protein 55 homolog isoform X1         |
| TCONS_00002606 | 0.535999 | 0.064664   | 0.220091    | BGIOSGA005245 | NP_001306701.1 probable protein phosphatase 2C37                                         |
| TCONS_00015364 | 0.536136 | 1.30101    | -0.468454   | BGIOSGA030790 | XP_015695700.1 enoyl-[acyl-carrier-protein] reductase [NADH] 1, chloroplastic            |
| TCONS_00026392 | 0.536254 | -0.0617077 | 0.990685    | BGIOSGA028458 | XP_006643935.1 ras-related protein Rab7                                                  |
| TCONS_00000473 | 0.536552 | -0.296634  | -0.580382   | BGIOSGA014024 | XP_006663442.1 GPI transamidase component PIG-T                                          |
| TCONS_00033458 | 0.536593 | 0.226996   | 0.868157    | BGIOSGA037371 | XP_002444971.1 glycosyltransferase family 92 protein Os08g0121900                        |
| TCONS_00027267 | 0.536635 | 0.107886   | 0.459732    | BGIOSGA027735 | XP_004973824.2 heat shock protein 81-1                                                   |
| TCONS_00030235 | 0.536671 | 1.70216    | 2.19055     | BGIOSGA020527 | XP_006656551.2 homeobox protein BEL1 homolog                                             |
| TCONS_00019971 | 0.536977 | -2.6149    | -1.78168    | BGIOSGA009420 | XP_003558380.13-ketoacyl-CoA synthase 1                                                  |
| TCONS_00011891 | 0.537073 | 0.45983    | -0.181263   | BGIOSGA010624 | XP_004975885.1 tankyrin repeat and SAM domain-containing protein 6                       |
| TCONS_00014411 | 0.53746  | -0.0756365 | -0.132544   | BGIOSGA016574 | XP_006664059.2 F-box protein At3g12350                                                   |
| TCONS_00037263 | 0.537732 | -0.615763  | 0.252034    | BGIOSGA036114 | XP_015699356.1 monothiol glutaredoxin-S4, mitochondrial                                  |
| TCONS_00000297 | 0.537855 | 0.214844   | 1.41713     | BGIOSGA003689 | XP_006653895.1 probable LRR receptor-like serine/threonine-protein kinase At1g63430      |
| TCONS_00015195 | 0.53787  | -3.87109   | 0.614726    | BGIOSGA016827 | XP_006657117.2 CBL-interacting protein kinase 24                                         |
| TCONS_00022532 | 0.537881 | 0.853277   | 1.11329     | BGIOSGA000785 | XP_015696171.1 protein EMBRYO SAC DEVELOPMENT ARREST 3, chloroplastic                    |
| TCONS_00026963 | 0.538018 | -0.882019  | 0.212061    | BGIOSGA029014 | XP_006644995.1 ATP-dependent zinc metalloprotease FTSH 3, mitochondrial                  |
| TCONS_00004708 | 0.538359 | 0.55456    | -0.304016   | BGIOSGA003811 | XP_004952992.1 very-long-chain 3-oxoacyl-CoA reductase 1                                 |
| TCONS_00008311 | 0.538437 | 1.1098     | 0.983868    | BGIOSGA035852 | XP_006655565.1 beta-1,3-galactosyltransferase pvg3-like                                  |
| TCONS_00019749 | 0.538503 | 0.160289   | -0.616147   | BGIOSGA019180 | XP_006660708.1 tuliposide A-converting enzyme 1, chloroplastic-like                      |
| TCONS_00030175 | 0.538608 | 1.47296    | -0.236954   | BGIOSGA034233 | XP_006660525.1 PREDICTED: uncharacterized protein LOC102707611                           |
| TCONS_00029795 | 0.539007 | 0.313039   | 1.06776     | BGIOSGA030020 | XP_006650909.1 derlin-2                                                                  |
| TCONS_00013552 | 0.539034 | 0.158067   | 0.201125    | BGIOSGA009423 | XP_015697038.1 1-acyl-sn-glycerol-3-phosphate acyltransferase 1, chloroplastic           |
| TCONS_00031392 | 0.539282 | -0.226331  | 1.17589     | BGIOSGA033205 | XP_006648576.2 PREDICTED: uncharacterized protein LOC102703558                           |
| TCONS_00005929 | 0.539415 | 1.48776    | 1.32349     | BGIOSGA037308 | XP_006658048.1 mitochondrial ubiquitin ligase activator of NFKB 1                        |
| TCONS_00025625 | 0.539699 | 0.793318   | 0.291234    | BGIOSGA023807 | XP_004953152.1 adenosine kinase 2                                                        |
| TCONS_00008414 | 0.539817 | -0.193143  | -0.722693   | BGIOSGA014706 | #N/A                                                                                     |
| TCONS_00014884 | 0.539819 | 0.465213   | 1.23664     | #N/A          | XP_006647113.1 peroxisome biogenesis protein 7                                           |
| TCONS_00007684 | 0.539893 | 0.860462   | 0.544724    | BGIOSGA013491 | NP_001152924.1 PTD08 protein                                                             |
| TCONS_00010984 | 0.540069 | 0.213021   | 0.12917     | BGIOSGA030285 | XP_006656946.1 50S ribosomal protein L30                                                 |
| TCONS_00020661 | 0.540201 | 1.54356    | -0.437692   | BGIOSGA027861 | XP_015695604.1 cyclin-D1-2-like                                                          |
| TCONS_00028025 | 0.540369 | 1.5241     | 1.73328     | BGIOSGA003380 | XP_002448989.1 phyto-sulfokines 5                                                        |
| TCONS_00035578 | 0.540561 | 0.251773   | -0.163135   | BGIOSGA034799 | XP_002438054.1 chitin elicitor receptor kinase 1                                         |
| TCONS_00030574 | 0.540628 | 1.59205    | 1.97383     | BGIOSGA030021 | XP_006651871.1 transcription factor JUNGBRUNNEN 1-like                                   |
| TCONS_00011057 | 0.540837 | 1.65069    | 0.823561    | BGIOSGA029518 | XP_006643887.1 60S ribosomal protein L11                                                 |
| TCONS_00000389 | 0.541006 | 0.678053   | 0.266993    | BGIOSGA010692 | XP_006649668.1 cytochrome P450 90B1                                                      |
| TCONS_00009622 | 0.541243 | -0.2101    | -0.0108256  | BGIOSGA012169 | XP_006644584.1 RNA polymerase II transcriptional coactivator KELP                        |
| TCONS_00004261 | 0.541247 | 0.953548   | -0.045276   | BGIOSGA000943 | XP_006656097.1 ubiquitin-like-specific protease 1D isoform X1                            |
| TCONS_00022276 | 0.541257 | -0.499325  | 0.00785079  | BGIOSGA021217 | XP_006653947.1 GTP-binding protein YPTM1-like                                            |
| TCONS_00018464 | 0.541287 | -0.183429  | 0.541293    | BGIOSGA029978 |                                                                                          |

transcriptome

|                |          |            |             |               |                                                                                                       |
|----------------|----------|------------|-------------|---------------|-------------------------------------------------------------------------------------------------------|
| TCONS_00034484 | 0.5413   | -0.315866  | 0.922132    | BGIOSGA030690 | XP_006663283.1 F-box/LRR-repeat protein At3g59190-like                                                |
| TCONS_00036501 | 0.541506 | 0.304716   | -0.07475    | BGIOSGA027393 | XP_006664787.1 plasma membrane ATPase 1 XP_006662694.1PREDICTED: uncharacterized protein LOC102706044 |
| TCONS_00034209 | 0.541547 | 0.458012   | 0.620803    | BGIOSGA036721 | XP_015692955.1 UPF0014 membrane protein STAR2                                                         |
| TCONS_00017024 | 0.541718 | 0.576834   | 0.164907    | BGIOSGA028705 | XP_006651325.1 peter Pan-like protein                                                                 |
| TCONS_00010056 | 0.541753 | 1.55601    | 1.28219     | BGIOSGA012600 | XP_002454694.1translation initiation factor IF3-4, chloroplastic                                      |
| TCONS_00008959 | 0.541773 | 0.425317   | 0.928062    | BGIOSGA005448 | XP_006650280.1PREDICTED: uncharacterized protein LOC102722752, partial                                |
| TCONS_00011100 | 0.541941 | -0.349856  | -0.559421   | BGIOSGA037678 | XP_003566742.1probable envelope ADP,ATP carrier protein, chloroplastic                                |
| TCONS_00003276 | 0.541995 | 1.09252    | 1.12011     | BGIOSGA001942 | XP_006664772.1 malate dehydrogenase, glyoxysomal                                                      |
| TCONS_00037582 | 0.542399 | 0.812118   | 0.836569    | BGIOSGA017515 | XP_015693149.1 chromatin structure-remodeling complex protein BSH                                     |
| TCONS_00006781 | 0.542856 | 0.135568   | -0.0808921  | BGIOSGA008954 | XP_006649445.1 glutathione reductase, chloroplastic-like                                              |
| TCONS_00009373 | 0.542951 | 1.34105    | 1.14476     | BGIOSGA009272 | XP_004983081.1phosphoglucomutase, chloroplastic                                                       |
| TCONS_00031943 | 0.543417 | -1.197     | -0.780225   | BGIOSGA013440 | XP_015692792.1 single-stranded DNA-binding protein, mitochondrial-like isoform X1                     |
| TCONS_00019611 | 0.543455 | 0.251836   | 0.661356    | BGIOSGA015273 | XP_021319681.1.exocyst complex component EXO70B1                                                      |
| TCONS_00014098 | 0.543666 | 0.363169   | 0.733043    | BGIOSGA019407 | XP_003572898.1ubiquitin carboxyl-terminal hydrolase Z3 isoform X1                                     |
| TCONS_00007017 | 0.544264 | 0.473368   | 0.718261    | BGIOSGA021774 | XP_006645051.1PREDICTED: uncharacterized protein LOC102721883                                         |
| TCONS_00002199 | 0.544344 | 0.647116   | 1.12851     | BGIOSGA000453 | XP_015689606.1 ATP-dependent DNA helicase homolog RECG, chloroplastic                                 |
| TCONS_00006736 | 0.544388 | 0.663508   | 0.850925    | BGIOSGA011197 | XP_006647056.1 50S ribosomal protein L19, chloroplastic-like                                          |
| TCONS_00007573 | 0.544672 | 0.820626   | 0.438324    | BGIOSGA008333 | XP_006650488.1 DNA-directed RNA polymerase I subunit RPA12-like                                       |
| TCONS_00010808 | 0.544705 | 0.909232   | 1.30952     | BGIOSGA013432 | XP_006648044.2 formin-like protein 7                                                                  |
| TCONS_00008960 | 0.544823 | 0.597979   | -0.0282963  | BGIOSGA005446 | XP_015689575.1 glucosidase 2 subunit beta                                                             |
| TCONS_00004403 | 0.54513  | 1.38724    | 0.87578     | BGIOSGA001897 | XP_004953768.1protein TIC 20-v, chloroplastic                                                         |
| TCONS_00006791 | 0.545166 | 1.54544    | 0.237543    | BGIOSGA008966 | XP_006644940.1 exocyst complex component EXO70B1-like                                                 |
| TCONS_00002098 | 0.545338 | -0.884647  | -0.701109   | BGIOSGA004726 | XP_015697510.1 serine-tRNA ligase, chloroplastic/mitochondrial                                        |
| TCONS_00033828 | 0.545439 | 1.33239    | 1.43473     | BGIOSGA021206 | XP_015689680.1 serine/threonine-protein kinase TAO3-like                                              |
| TCONS_00004246 | 0.545504 | 0.00510652 | 0.0879423   | BGIOSGA026025 | XP_002439004.1tRNA-dihydrouridine(16/17) synthase [NAD(P)(+)]-like                                    |
| TCONS_00022899 | 0.545601 | 1.30497    | 1.29516     | BGIOSGA020544 | XP_015694739.1 serine/threonine-protein kinase STY8                                                   |
| TCONS_00025573 | 0.545714 | 0.0636689  | 0.733297    | BGIOSGA000828 | XP_006656560.1 probable transcription factor KAN2                                                     |
| TCONS_00021472 | 0.54572  | 1.48999    | 1.65566     | BGIOSGA034370 | XP_006656771.1 putative 12-oxophytodienoate reductase 4 isoform X1                                    |
| TCONS_00021846 | 0.545948 | 0.627947   | 0.0292821   | BGIOSGA001628 | XP_006651405.2 sugar transporter ERD6-like 16                                                         |
| TCONS_00012310 | 0.545949 | -0.163288  | 0.0791553   | BGIOSGA022478 | XP_006643944.1 rac-like GTP-binding protein 1                                                         |
| TCONS_00003144 | 0.546145 | -1.21098   | 0.195164    | BGIOSGA006608 | XP_015692344.1 autophagy-related protein 8B                                                           |
| TCONS_00016644 | 0.546146 | -0.529342  | -0.234981   | BGIOSGA024235 | XP_006657562.1 acyl carrier protein 1, mitochondrial                                                  |
| TCONS_00023358 | 0.546488 | 0.936477   | 0.720065    | BGIOSGA036272 | XP_006659745.1 GDP-mannose transporter                                                                |
| TCONS_00027215 | 0.54676  | 0.958162   | 0.717188    | BGIOSGA009527 | GONST1-like                                                                                           |
| TCONS_00001822 | 0.546767 | 0.470675   | 0.642775    | BGIOSGA004458 | XP_006646323.1 50S ribosomal protein L13, chloroplastic                                               |
| TCONS_00035524 | 0.546934 | 0.471692   | 0.870731    | BGIOSGA036946 | XP_022684237.1disease resistance protein RGA2-like                                                    |
| TCONS_00017837 | 0.547154 | 0.203482   | 0.157469    | BGIOSGA019896 | XP_006654421.1PREDICTED: uncharacterized protein LOC102709926                                         |
| TCONS_00018385 | 0.547411 | 0.411904   | -0.00064548 | BGIOSGA008261 | XP_004961108.1predicted GPI-anchored protein 58                                                       |
| TCONS_00022756 | 0.547449 | -0.0427089 | 0.715468    | BGIOSGA007158 | XP_020394918.1protein G1-like1                                                                        |
| TCONS_00011195 | 0.547486 | -0.108344  | -0.486258   | BGIOSGA013797 | XP_015690832.1 zerumbone synthase                                                                     |
| TCONS_00007969 | 0.547555 | 1.39489    | 1.12929     | BGIOSGA006512 | XP_002453780.1uncharacterized protein LOC8081691                                                      |
| TCONS_00023127 | 0.547559 | 0.77281    | -0.207104   | BGIOSGA013685 | XP_006657452.1 peroxisomal membrane protein 13 isoform X2                                             |
| TCONS_00024264 | 0.54777  | -0.770817  | -0.948752   | BGIOSGA031495 | XP_006658910.1PREDICTED: uncharacterized protein LOC102714663, partial                                |
| TCONS_00032729 | 0.547969 | 0.108636   | -0.00203699 | BGIOSGA025891 | NP_001142936.1uncharacterized LOC100275376                                                            |
| TCONS_00004208 | 0.548128 | 2.99596    | 0.775176    | BGIOSGA000995 | XP_015697631.1 probable serine/threonine-protein kinase At1g18390                                     |
| TCONS_00026082 | 0.548159 | 1.54136    | 1.19014     | BGIOSGA028140 | XP_015695725.1 F-box/LRR-repeat protein At1g55660-like isoform X2                                     |
| TCONS_00011913 | 0.548361 | -1.67127   | -1.69738    | BGIOSGA023824 | XP_006651222.1 probable carboxylesterase 9                                                            |
| TCONS_00029736 | 0.548589 | 1.18661    | -0.323901   | BGIOSGA032746 | NP_001148769.1fiber protein Fb34 precursor                                                            |
| TCONS_00030586 | 0.548891 | #NA        | #NA         | #NA           | #NA                                                                                                   |
| TCONS_00021606 | 0.548959 | 0.86085    | 0.345107    | BGIOSGA021923 | XP_006655784.1 iron-sulfur assembly protein IscA, chloroplastic isoform X1                            |
| TCONS_00028851 | 0.548992 | 0.985819   | 0.795691    | BGIOSGA035901 | XP_006661163.2 CRM-domain containing factor CFM3, chloroplastic/mitochondrial-like                    |
| TCONS_00033016 | 0.549021 | 0.739577   | 0.118728    | BGIOSGA026208 | XP_015698033.1 transcription factor VIP1-like                                                         |
| TCONS_00001650 | 0.549073 | 0.953439   | 1.00343     | BGIOSGA017638 | XP_015699274.1 AP-1 complex subunit mu-2                                                              |
| TCONS_00015229 | 0.549293 | -0.30004   | 0.59167     | BGIOSGA017415 | XP_006653083.1PREDICTED: uncharacterized protein LOC102711253                                         |



## transcriptome

|                |          |            |           |               |                                                                                          |
|----------------|----------|------------|-----------|---------------|------------------------------------------------------------------------------------------|
| TCONS_00032773 | 0.549399 | 1.22634    | 1.08517   | BGIOSGA031336 | XP_015697429.1PREDICTED: uncharacterized protein LOC102707618 isoform X1                 |
| TCONS_00016557 | 0.54942  | 0.24431    | 0.88744   | BGIOSGA014410 | XP_003580453.1alkylated DNA repair protein ALKBH8 homolog                                |
| TCONS_00036806 | 0.549658 | -1.63046   | -0.591199 | BGIOSGA036507 | XP_006663887.1 3'(2'),5'-bisphosphate nucleotidase-like                                  |
| TCONS_00020898 | 0.549662 | 0.328057   | 0.0692675 | BGIOSGA023106 | XP_015693727.1 transmembrane protein 258                                                 |
| TCONS_00016783 | 0.549918 | 1.06305    | 0.42973   | BGIOSGA014184 | XP_004960144.1ribosomal RNA processing protein 1 homolog isoform X1                      |
| TCONS_00019418 | 0.550261 | -0.0967569 | 0.0680494 | BGIOSGA009489 | XP_006654499.1PREDICTED: uncharacterized protein LOC102709564 isoform X2                 |
| TCONS_00002964 | 0.550314 | 0.804633   | 0.835008  | BGIOSGA032692 | XP_006645565.1 DNA mismatch repair protein MSH7                                          |
| TCONS_00014248 | 0.550526 | 1.02295    | 0.387116  | BGIOSGA016409 | XP_008668184.1structural molecule isoform X2                                             |
| TCONS_00015677 | 0.551066 | 0.128581   | 0.642352  | BGIOSGA006454 | XP_006653286.2 U-box domain-containing protein 9-like                                    |
| TCONS_00032612 | 0.55114  | 0.0982743  | 0.558212  | BGIOSGA031501 | XP_006661996.1 protein PAM68, chloroplastic                                              |
| TCONS_00026085 | 0.551221 | 0.773205   | 0.534362  | BGIOSGA028158 | XP_006659204.1 obg-like ATPase 1                                                         |
| TCONS_00002577 | 0.551227 | 0.459104   | -0.151335 | BGIOSGA005220 | XP_004971333.1NAD(P)H-quinone oxidoreductase subunit O, chloroplastic                    |
| TCONS_00014507 | 0.551268 | -0.573592  | 0.767384  | BGIOSGA016669 | XP_006652457.1 uncharacterized CRM domain-containing protein At3g25440, chloroplastic    |
| TCONS_00022087 | 0.551287 | -4.80243   | -1.6477   | BGIOSGA004012 | XP_006656895.1 UDP-glycosyltransferase 708A6-like                                        |
| TCONS_00021349 | 0.551306 | 0.0304316  | 0.336132  | BGIOSGA025518 | XP_015694183.1 protein DETOXIFICATION 16-like isoform X1                                 |
| TCONS_00011412 | 0.551536 | 1.8965     | 1.23655   | BGIOSGA011614 | XP_002466026.1UPF0187 protein At3g61320, chloroplastic                                   |
| TCONS_00001005 | 0.551891 | 1.1037     | 1.26834   | BGIOSGA004677 | XP_024316138.1pentatricopeptide repeat-containing protein At5g11310, mitochondrial-like  |
| TCONS_00030032 | 0.552066 | 0.530012   | 0.284788  | BGIOSGA029775 | XP_003576520.1fructose-bisphosphate aldolase-lysine N-methyltransferase, chloroplastic   |
| TCONS_00031641 | 0.552198 | -0.19653   | 1.42962   | BGIOSGA025742 | XP_003574352.1casein kinase II subunit beta-1                                            |
| TCONS_00021201 | 0.552298 | -0.374155  | 0.298234  | BGIOSGA031074 | XP_006656340.1 receptor-like cytosolic serine/threonine-protein kinase RBK1              |
| TCONS_00027136 | 0.552334 | 1.82561    | 1.72205   | BGIOSGA007755 | XP_015696024.1 peptidyl-prolyl cis-trans isomerase CYP71                                 |
| TCONS_00022131 | 0.552409 | 0.439987   | 0.956025  | BGIOSGA008943 | XP_003563917.1protein-tyrosine-phosphatase IBR5                                          |
| TCONS_00023682 | 0.552843 | 0.750598   | 0.91953   | BGIOSGA001620 | XP_006658561.1 asparagine--tRNA ligase, chloroplastic/mitochondrial                      |
| TCONS_00011171 | 0.553136 | 0.335073   | 1.20702   | BGIOSGA013776 | XP_006650758.2 5'-adenylylsulfate reductase-like 5                                       |
| TCONS_00010331 | 0.553685 | 0.334109   | 0.791173  | BGIOSGA001051 | XP_015689940.1 putative receptor protein kinase ZmPK1                                    |
| TCONS_00026435 | 0.553707 | 0.0261197  | 0.237602  | BGIOSGA024652 | XP_006659337.2 myb family transcription factor APL-like                                  |
| TCONS_00023352 | 0.553911 | 0.8677     | 0.565386  | BGIOSGA023341 | XP_006647334.1 ent-cassadiene C2-hydroxylase-like                                        |
| TCONS_00026474 | 0.553958 | 0.00268765 | 1.09907   | BGIOSGA028542 | XP_015695579.1PREDICTED: uncharacterized protein LOC107304721, partial                   |
| TCONS_00023771 | 0.554319 | -1.81015   | 0.0163811 | BGIOSGA013733 | XP_003560151.118.8 kDa class V heat shock protein                                        |
| TCONS_00027537 | 0.554455 | 0.310622   | -0.31567  | BGIOSGA030015 | XP_006659321.1 GDP-mannose transporter GONST4-like                                       |
| TCONS_00005507 | 0.554618 | -0.343498  | 0.339499  | BGIOSGA007621 | XP_008674599.1protein-O-fucosyltransferase 1 isoform X1                                  |
| TCONS_00026896 | 0.554623 | 0.320999   | 0.708295  | BGIOSGA028956 | XP_004973850.1thylakoid lumenal 19 kDa protein, chloroplastic                            |
| TCONS_00022259 | 0.554867 | 0.305876   | 1.57472   | BGIOSGA021234 | XP_008672768.1thioredoxin superfamily protein isoform X1                                 |
| TCONS_00026998 | 0.554964 | -3.52634   | 0.310182  | BGIOSGA029049 | XP_006659619.1 65-kDa microtubule-associated protein 8                                   |
| TCONS_00009580 | 0.55572  | -0.804743  | 0.538534  | BGIOSGA012133 | XP_004985169.1sprT-like domain-containing protein Spartan                                |
| TCONS_00018004 | 0.555935 | 0.795692   | 0.457666  | BGIOSGA020052 | XP_015692634.1 mucin-1                                                                   |
| TCONS_00031109 | 0.555978 | 0.561992   | -0.474868 | BGIOSGA001197 | XP_015697450.1 probable aldo-keto reductase 1                                            |
| TCONS_00011489 | 0.556056 | 0.447616   | -0.266424 | BGIOSGA023094 | XP_015691235.1 K(+) efflux antiporter 5 isoform X2                                       |
| TCONS_00027248 | 0.55615  | 0.86535    | 1.21473   | BGIOSGA027753 | XP_002444926.1polyadenylate-binding protein-interacting protein 12                       |
| TCONS_00025497 | 0.55619  | 1.40718    | 1.70588   | BGIOSGA012882 | XP_006657926.1 putative G3BP-like protein                                                |
| TCONS_00020077 | 0.556279 | -0.0917097 | 0.472027  | BGIOSGA022257 | XP_015693444.1 transcription initiation factor TFIID subunit 14b                         |
| TCONS_00000681 | 0.556441 | 1.22342    | 1.86876   | BGIOSGA036552 | XP_006644067.2 pentatricopeptide repeat-containing protein At1g80270, mitochondrial-like |
| TCONS_00022636 | 0.556566 | -0.358076  | 0.665849  | BGIOSGA010100 | XP_004965769.1ent-cassadiene C2-hydroxylase                                              |
| TCONS_00020240 | 0.557152 | 0.324164   | 0.196938  | BGIOSGA037725 | XP_006655851.1 protein DA1-related 1-like                                                |
| TCONS_00030224 | 0.557759 | -3.26512   | -3.06637  | BGIOSGA008961 | XP_006661352.1 cellulose synthase-like protein E6                                        |
| TCONS_00010198 | 0.557813 | -1.53547   | -0.424968 | BGIOSGA029421 | NP_001152498.2acyltransferase precursor                                                  |
| TCONS_00022122 | 0.558077 | 0.509941   | 0.758752  | BGIOSGA021382 | XP_006656911.1 protein FATTY ACID EXPORT 1, chloroplastic-like                           |
| TCONS_00000366 | 0.558115 | 1.36227    | 0.927923  | BGIOSGA002020 | XP_006645601.1 ectonucleotide pyrophosphatase/phosphodiesterase family member 3-like     |
| TCONS_00005140 | 0.558655 | -0.133211  | 1.27872   | BGIOSGA000063 | XP_006645356.2PREDICTED: uncharacterized protein LOC102716178                            |
| TCONS_00035573 | 0.558686 | 0.725402   | 0.728031  | BGIOSGA034795 | XP_006664335.1 peptidyl-prolyl cis-trans isomerase FKBP42                                |
| TCONS_00026847 | 0.558776 | 0.539658   | 1.15908   | BGIOSGA023243 | XP_006659530.1 C2 and GRAM domain-containing protein At1g03370-like isoform X1           |
| TCONS_00011249 | 0.558877 | -1.02786   | 0.0415126 | BGIOSGA013848 | XP_006650820.1 dolichol-phosphate mannosyltransferase subunit 1                          |

## transcriptome

|                |          |           |             |              |                                                                                                |
|----------------|----------|-----------|-------------|--------------|------------------------------------------------------------------------------------------------|
| TCONS_00019334 | 0.559151 | -2.68829  | -0.187041   | BGOSGA014332 | XP_015692437.1 dnaJ homolog subfamily B member 13-like                                         |
| TCONS_00001112 | 0.559575 | 0.431058  | 0.542052    | BGOSGA003736 | XP_006644282.1 DEAD-box ATP-dependent RNA helicase 15                                          |
| TCONS_00007894 | 0.559637 | 0.118449  | 0.331127    | BGOSGA008072 | XP_006647217.1 PREDICTED: uncharacterized protein LOC102717678 isoform X1                      |
| TCONS_00000022 | 0.559804 | 0.925888  | 0.117254    | BGOSGA005442 | XP_004967927.1 protein NCA1                                                                    |
| TCONS_00035113 | 0.560317 | 1.16126   | 1.12184     | BGOSGA030000 | XP_006663020.1 CDK5RAP1-like protein                                                           |
| TCONS_00020817 | 0.560381 | 0.611527  | 1.28481     | BGOSGA027351 | XP_015694208.1 cyclic nucleotide-gated ion channel 1-like isoform X1                           |
| TCONS_00016576 | 0.560696 | 0.672333  | 1.13106     | BGOSGA028232 | XP_006652784.1 uncharacterized membrane protein At1g16860-like                                 |
| TCONS_00036417 | 0.560843 | 0.81098   | 0.641007    | BGOSGA018136 | XP_004977833.2L10-interacting MYB domain-containing protein                                    |
| TCONS_00010822 | 0.561375 | -1.06169  | 0.184873    | BGOSGA013447 | XP_015691007.1 PREDICTED: uncharacterized protein LOC102715652 isoform X2                      |
| TCONS_00026240 | 0.561382 | -0.524077 | -0.210903   | BGOSGA028318 | XP_006659978.1 PREDICTED: uncharacterized protein LOC102719609, partial                        |
| TCONS_00005176 | 0.561426 | -1.3371   | 0.226977    | BGOSGA000030 | XP_006646732.1 DEAD-box ATP-dependent RNA helicase 58, chloroplastic                           |
| TCONS_00015011 | 0.561662 | -0.140056 | 0.726049    | BGOSGA031690 | XP_006652868.1 anthocyanidin reductase-like                                                    |
| TCONS_00026501 | 0.561717 | 0.319305  | -0.0705563  | BGOSGA019358 | XP_015695581.1 nudix hydrolase 15, mitochondrial-like                                          |
| TCONS_00010656 | 0.561879 | 0.774681  | 0.940422    | BGOSGA010084 | XP_021301928.1 uncharacterized protein LOC8064631                                              |
| TCONS_00010297 | 0.562131 | 0.316891  | 0.0580758   | BGOSGA013075 | XP_006650194.1 ACT domain-containing protein ACR4                                              |
| TCONS_00026915 | 0.562131 | 1.41412   | 1.47425     | BGOSGA036965 | XP_006659570.1 pre-rRNA-processing protein TSR2-like                                           |
| TCONS_00035402 | 0.562268 | 1.43614   | 0.355208    | BGOSGA022937 | XP_002451314.1 vacuolar protein sorting-associated protein 2 homolog 1                         |
| TCONS_00034134 | 0.562382 | -3.17388  | -0.938753   | BGOSGA003354 | XP_006662656.1 probable receptor-like protein kinase At5g18500                                 |
| TCONS_00017761 | 0.56246  | 0.709647  | 1.10734     | BGOSGA019067 | XP_006654366.1 kinesin-like protein KIF22                                                      |
| TCONS_00013995 | 0.562613 | -2.14126  | -0.51337    | BGOSGA016142 | XP_003621683.2 aldo/keto reductase family oxidoreductase                                       |
| TCONS_00013449 | 0.563406 | -0.375518 | -0.714634   | BGOSGA020078 | XP_013457837.1 transmembrane protein, putative                                                 |
| TCONS_00018238 | 0.563536 | 0.0799633 | -0.0903704  | BGOSGA020296 | XP_006654731.1 WD repeat-containing protein 82                                                 |
| TCONS_00014574 | 0.563986 | 0.085035  | 0.00960304  | BGOSGA008632 | XP_006652495.2 glutaredoxin-C6                                                                 |
| TCONS_00019925 | 0.563997 | -0.336705 | 0.204773    | BGOSGA017437 | XP_006654885.2 PREDICTED: uncharacterized protein LOC102703123                                 |
| TCONS_00013493 | 0.564197 | 1.3457    | 0.747222    | BGOSGA004862 | XP_006650864.1 actin-3                                                                         |
| TCONS_00035548 | 0.564464 | 1.28208   | 1.27071     | BGOSGA034775 | XP_015698210.1 2-isopropylmalate synthase A-like                                               |
| TCONS_00001143 | 0.564822 | 0.225021  | -0.513446   | #N/A         | #N/A                                                                                           |
| TCONS_00033492 | 0.564901 | 0.740891  | -0.0356986  | BGOSGA012523 | XP_006662941.1 probable WRKY transcription factor 56                                           |
| TCONS_00004158 | 0.565658 | 0.321974  | 1.05886     | BGOSGA036411 | XP_015688144.1 katanin p60 ATPase-containing subunit A-like 2                                  |
| TCONS_00033700 | 0.565726 | -0.384968 | 0.495773    | BGOSGA030496 | XP_006662975.2 protein WAVE-DAMPENED 2-like                                                    |
| TCONS_00027895 | 0.565763 | -0.619182 | 0.236678    | BGOSGA003763 | XP_006660084.2 chloroplastic group IIA intron splicing facilitator CRS1, chloroplastic         |
| TCONS_00032214 | 0.565905 | -0.067088 | 1.44856     | BGOSGA011926 | XP_006661774.1 exocyst complex component SEC15A-like                                           |
| TCONS_00021235 | 0.565909 | -0.11061  | 0.779018    | BGOSGA023461 | XP_006657246.1 geranylgeranyl transferase type-2 subunit alpha                                 |
| TCONS_00030285 | 0.566036 | -0.548936 | 1.01143     | BGOSGA026682 | XP_015696665.1 tetraketide alpha-pyrone reductase 1-like                                       |
| TCONS_00009504 | 0.566087 | -0.560683 | 0.577519    | BGOSGA012054 | XP_006649570.1 UPF0496 protein 1                                                               |
| TCONS_00013196 | 0.566119 | -1.76654  | -0.567203   | BGOSGA023934 | XP_015690777.1 COBRA-like protein 3 isoform X1                                                 |
| TCONS_00002086 | 0.566198 | 0.465419  | -0.224586   | BGOSGA024813 | XP_004970402.1 CBL-interacting protein kinase 11                                               |
| TCONS_00019579 | 0.566337 | 1.2179    | 2.66836     | BGOSGA017779 | NP_001152707.1 allyl alcohol dehydrogenase-like protein                                        |
| TCONS_00017499 | 0.566628 | -0.397382 | -0.00277495 | BGOSGA008571 | XP_006654236.1 protein phosphatase inhibitor 2-like                                            |
| TCONS_00014347 | 0.566675 | 0.19465   | 1.33593     | BGOSGA016508 | XP_003579864.1 pentatricopeptide repeat-containing protein At5g09450, mitochondrial            |
| TCONS_00016201 | 0.567039 | -0.272375 | 0.776794    | BGOSGA014774 | XP_006652483.1 dol-P-Glc:Glc(2)Man(9)GlcNAc(2)-PP-Dol alpha-1,2-glucosyltransferase isoform X2 |
| TCONS_00018990 | 0.567099 | -0.780636 | -0.815181   | BGOSGA018373 | XP_015693241.1 protein plastid transcriptionally active 16, chloroplastic                      |
| TCONS_00030803 | 0.567283 | 1.07002   | 0.117768    | BGOSGA024546 | XP_004981982.1 uncharacterized protein LOC101784562                                            |
| TCONS_00035645 | 0.567306 | 0.58621   | 0.686888    | BGOSGA037066 | XP_008662338.14-alpha-L-fucosyltransferase isoform X1                                          |
| TCONS_00023695 | 0.567384 | -2.41031  | -0.873152   | BGOSGA030669 | XP_006658616.2 cytochrome P450 716B1-like                                                      |
| TCONS_00013512 | 0.567468 | 0.0421318 | 0.50695     | BGOSGA016415 | XP_006652009.1 prohibitin-1, mitochondrial-like                                                |
| TCONS_00020243 | 0.567512 | 0.17449   | 0.348926    | BGOSGA028363 | XP_006655856.1 formin-like protein 6                                                           |
| TCONS_00001556 | 0.567572 | 0.0341577 | 0.940314    | BGOSGA004186 | XP_006646195.1 pentatricopeptide repeat-containing protein At1g30610, chloroplastic isoform X1 |
| TCONS_00000695 | 0.567586 | 0.784825  | 1.41919     | BGOSGA003286 | XP_003567459.1 peptidyl-prolyl cis-trans isomerase                                             |
| TCONS_00007633 | 0.567908 | -0.363715 | -1.36923    | BGOSGA006848 | XP_006648471.1 peroxisomal membrane protein PMP22-like                                         |
| TCONS_00009559 | 0.567977 | 0.115844  | 1.09098     | BGOSGA012107 | XP_008658422.1 stethylcyanin isoform X1                                                        |
| TCONS_00001541 | 0.568121 | 0.461462  | 0.0488586   | BGOSGA004172 | XP_002467510.1 nudC domain-containing protein 2 isoform X1                                     |

transcriptome

|                |          |            |           |               |                                                                                                |
|----------------|----------|------------|-----------|---------------|------------------------------------------------------------------------------------------------|
| TCONS_00005837 | 0.568176 | 0.218984   | 1.56892   | BGIOSGA007963 | XP_006648541.1 tobamovirus multiplication protein 2B-like                                      |
| TCONS_00021564 | 0.568665 | -0.394747  | -0.394283 | BGIOSGA022245 | XP_024316062.1 uncharacterized protein LOC112271179                                            |
| TCONS_00027231 | 0.56867  | 1.33516    | 1.03006   | BGIOSGA020163 | XP_006659048.2 phospholipase SGR2                                                              |
| TCONS_00022642 | 0.568705 | 0.869862   | 0.272747  | BGIOSGA001181 | XP_002453412.1 proteasome subunit beta type-3                                                  |
| TCONS_00030838 | 0.568842 | -0.116031  | 0.16689   | BGIOSGA033607 | XP_006661676.1 probable cinnamyl alcohol dehydrogenase 1                                       |
| TCONS_00006440 | 0.569173 | -1.0273    | -0.626526 | BGIOSGA023312 | XP_002452430.1 zinc finger protein CONSTANS-LIKE 3                                             |
| TCONS_00002919 | 0.569258 | 1.26943    | -1.43737  | BGIOSGA017102 | XP_006643804.2 galactinol-sucrose galactosyltransferase-like                                   |
| TCONS_00008116 | 0.569279 | -1.9555    | 1.19161   | #N/A          | #N/A                                                                                           |
| TCONS_00021075 | 0.569279 | #NA        | -1.50883  | #N/A          | #N/A                                                                                           |
| TCONS_00013069 | 0.569311 | 0.0819937  | 0.374     | BGIOSGA004992 | NP_001170515.1 cytochrome c oxidase assembly protein ctaG                                      |
| TCONS_00031259 | 0.569633 | 1.0837     | 0.386769  | BGIOSGA033078 | XP_003571839.1 protein CHROMATIN REMODELING 20 isoform X2                                      |
| TCONS_00007567 | 0.56967  | 0.296222   | -1.56307  | BGIOSGA002288 | XP_015688502.1 transcription factor HY5-like                                                   |
| TCONS_00024131 | 0.569708 | 0.558218   | 0.876087  | BGIOSGA010613 | XP_015694733.1 copper-transporting ATPase PAA1, chloroplastic-like                             |
| TCONS_00024745 | 0.569742 | 0.186082   | -0.1152   | BGIOSGA009601 | XP_015698938.1 cycloartenol-C-24-methyltransferase 1                                           |
| TCONS_00003302 | 0.569859 | -0.0243194 | 1.22763   | BGIOSGA018523 | XP_015688164.1 PREDICTED: uncharacterized protein LOC102702619, partial                        |
| TCONS_00033336 | 0.570052 | -1.99713   | -0.553453 | BGIOSGA019008 | XP_004979190.1 receptor protein kinase-like protein ZAR1                                       |
| TCONS_00013534 | 0.570337 | 0.770731   | 0.33248   | BGIOSGA009448 | XP_004987364.1 uncharacterized protein LOC101778812                                            |
| TCONS_00004907 | 0.570455 | -0.175818  | 0.523616  | BGIOSGA000314 | XP_006645182.1 U-box domain-containing protein 45                                              |
| TCONS_00025621 | 0.570583 | 1.72637    | 0.87918   | BGIOSGA033238 | XP_021318592.1 uncharacterized protein LOC8075867 isoform X2                                   |
| TCONS_00009185 | 0.570633 | -0.372088  | -1.51218  | BGIOSGA013826 | XP_006649268.1 PREDICTED: uncharacterized protein LOC102711510 isoform X1                      |
| TCONS_00032708 | 0.570681 | -0.1327    | 0.875842  | BGIOSGA001636 | XP_006662064.1 serine/arginine repetitive matrix protein 1-like                                |
| TCONS_00021777 | 0.57071  | 0.175424   | 0.99798   | BGIOSGA035175 | XP_006655872.1 ubiquitin-conjugating enzyme E2 34-like                                         |
| TCONS_00013463 | 0.570739 | 0.61311    | 0.148285  | BGIOSGA028235 | XP_004963535.1 G-type lectin S-receptor-like serine/threonine-protein kinase LECRK3            |
| TCONS_00001704 | 0.5708   | -0.511713  | -0.490955 | BGIOSGA019250 | XP_006644626.1 tryptophan aminotransferase-related protein 4-like                              |
| TCONS_00023539 | 0.570868 | 1.64091    | -0.459285 | BGIOSGA012723 | XP_006658008.1 cytochrome P450 709B2-like                                                      |
| TCONS_00035286 | 0.57094  | -3.1045    | 0.623152  | BGIOSGA009029 | XP_022680199.1 uncharacterized protein LOC101767362 isoform X2                                 |
| TCONS_00025204 | 0.570956 | -0.250313  | 0.197423  | BGIOSGA024215 | XP_006658617.1 microtubule-associated protein TORTIFOLIA1                                      |
| TCONS_00022846 | 0.571356 | -0.0750365 | -0.347657 | BGIOSGA008383 | XP_021305234.1 protein ENHANCED DISEASE RESISTANCE 2-like isoform X2                           |
| TCONS_00022570 | 0.571454 | 0.125477   | 0.428724  | BGIOSGA020881 | XP_015693639.1 VQ motif-containing protein 25                                                  |
| TCONS_00013033 | 0.571872 | 0.530863   | 0.921146  | BGIOSGA009954 | XP_006650474.1 outer envelope protein 64, chloroplastic                                        |
| TCONS_00028603 | 0.572437 | -2.87841   | -1.20058  | BGIOSGA027198 | XP_006660446.1 fasciclin-like arabinogalactan protein 2                                        |
| TCONS_00029140 | 0.572762 | 0.143817   | 0.442791  | BGIOSGA014130 | XP_006660686.1 probable N-succinyl-diaminopimelate aminotransferase DapC                       |
| TCONS_00004260 | 0.572836 | 0.857039   | 0.328807  | BGIOSGA036755 | XP_006644583.1 protein PLASTID TRANSCRIPTIONALLY ACTIVE 7 isoform X2                           |
| TCONS_00007052 | 0.573061 | 0.551026   | 0.1271    | BGIOSGA017168 | XP_006649140.2 PREDICTED: uncharacterized protein LOC102710100                                 |
| TCONS_00015493 | 0.573068 | 0.531875   | 1.15778   | BGIOSGA008773 | XP_006664813.1 probable aquaporin PIP2-6                                                       |
| TCONS_00007083 | 0.573123 | -0.436285  | 1.13986   | BGIOSGA009264 | XP_006648090.2 translation initiation factor eIF-2B subunit epsilon                            |
| TCONS_00030429 | 0.573151 | 1.21463    | -0.534365 | BGIOSGA019728 | XP_006660888.1 seipin-2-like                                                                   |
| TCONS_00001510 | 0.573284 | 1.96803    | -0.925773 | BGIOSGA024463 | XP_006644469.1 acidic endochitinase-like                                                       |
| TCONS_00036691 | 0.573471 | 1.152      | 0.954504  | BGIOSGA036620 | XP_014757281.1 pentatricopeptide repeat-containing protein At1g22960, mitochondrial isoform X1 |
| TCONS_00028005 | 0.573504 | 0.359707   | 1.42933   | BGIOSGA026981 | XP_006659391.1 MK167 FHA domain-interacting nucleolar phosphoprotein-like                      |
| TCONS_00005819 | 0.573705 | -1.96049   | -0.519797 | BGIOSGA004493 | XP_015689117.1 dynein light chain LC6, flagellar outer arm-like                                |
| TCONS_00005432 | 0.573705 | #NA        | 1.06517   | #N/A          | #N/A                                                                                           |
| TCONS_00024171 | 0.57381  | #NA        | -0.384001 | BGIOSGA018909 | XP_004958441.1 transcription factor MYB61                                                      |
| TCONS_00022201 | 0.573969 | 1.09416    | 0.0189701 | BGIOSGA025442 | XP_006656061.1 anthocyanidin 5,3-O-glucosyltransferase-like                                    |
| TCONS_00017278 | 0.574273 | -0.376148  | 1.93823   | BGIOSGA024260 | XP_012701226.1 disease resistance protein RPP13                                                |
| TCONS_00030398 | 0.574348 | 2.40689    | 0.246932  | BGIOSGA040485 | XP_006661460.1 UDP-glucose 4-epimerase 3                                                       |
| TCONS_00011577 | 0.574616 | 0.245485   | 0.319649  | BGIOSGA033039 | XP_006649411.1 protein GDPAP2 homolog                                                          |
| TCONS_00016715 | 0.575166 | -1.29189   | -0.195252 | BGIOSGA014247 | XP_015691327.1 binding partner of ACD11 1 isoform X1                                           |
| TCONS_00027772 | 0.575289 | -0.0308316 | 0.673788  | BGIOSGA017238 | XP_006660026.1 synaptotagmin-5-like                                                            |
| TCONS_00032370 | 0.575313 | -0.140494  | 0.321393  | BGIOSGA033084 | XP_004957650.1 tetra- and pentapeptide repeat domain-containing protein PYG7, chloroplastic    |
| TCONS_00008305 | 0.57573  | 0.201807   | 0.260218  | BGIOSGA006123 | XP_006647455.1 vacuolar protein sorting-associated protein 20 homolog 2-like                   |
| TCONS_00033025 | 0.575833 | 1.86661    | -0.710941 | BGIOSGA001826 | XP_006662757.1 disease resistance protein RGA2-like                                            |
| TCONS_00031652 | 0.575882 | 0.313662   | 0.866292  | BGIOSGA033468 | XP_004983603.1 SH2 domain-containing protein B isoform X1                                      |

transcriptome

|                |          |            |             |               |                                                                                                                                                      |
|----------------|----------|------------|-------------|---------------|------------------------------------------------------------------------------------------------------------------------------------------------------|
| TCONS_00017290 | 0.575939 | -0.203916  | -0.711202   | BGIOSGA002945 | XP_003566445.1cytochrome P450 90D2<br>XP_003558154.1probable protein phosphatase 2C 32                                                               |
| TCONS_00009846 | 0.576024 | 0.620289   | 0.249598    | BGIOSGA012398 |                                                                                                                                                      |
| TCONS_00030933 | 0.576131 | 0.583319   | 0.421625    | BGIOSGA032740 | XP_006662283.1 zinc finger protein-like 1<br>XP_006645189.1 exocyst complex component EXO70A1-like                                                   |
| TCONS_00002370 | 0.576365 | 0.933053   | 1.33214     | BGIOSGA020760 | XP_006660977.1 mitochondrial amidoxime reducing component 2-like<br>XP_006658634.1PREDICTED: uncharacterized protein LOC102720895                    |
| TCONS_00029509 | 0.576416 | 0.506775   | 0.683181    | BGIOSGA031264 | XP_021316952.1uncharacterized protein LOC8086185                                                                                                     |
| TCONS_00025235 | 0.576575 | 1.0762     | 0.636384    | BGIOSGA016050 | XP_015694103.1PREDICTED: uncharacterized protein LOC102712736                                                                                        |
| TCONS_00011026 | 0.576996 | -3.15504   | 1.35683     | BGIOSGA013628 | XP_004956467.1mediator of RNA polymerase II transcription subunit 14 isoform X1                                                                      |
| TCONS_00026189 | 0.577372 | -0.059951  | 0.213727    | BGIOSGA003631 | XP_006658722.1 protein FREE1<br>XP_006660876.1 mediator of RNA polymerase II transcription subunit 10b-like                                          |
| TCONS_00029738 | 0.577755 | 1.30476    | 0.943873    | BGIOSGA025162 |                                                                                                                                                      |
| TCONS_00023955 | 0.577759 | 0.740621   | 0.463576    | BGIOSGA033110 | XP_002460652.1hydrophobic protein OSR8<br>XP_006643815.1PREDICTED: uncharacterized protein At2g34160-like                                            |
| TCONS_00030403 | 0.577905 | 0.686537   | 0.272521    | BGIOSGA025571 | XP_006645031.1PREDICTED: uncharacterized protein LOC102716268                                                                                        |
| TCONS_00029496 | 0.577968 | -0.320147  | -0.51423    | BGIOSGA023380 | XP_006654389.1 LEC14B protein-like<br>XP_010236682.2histone-lysine N-methyltransferase, H3 lysine-9 specific SUVH6 isoform X2                        |
| TCONS_00002933 | 0.57799  | 0.417544   | -0.00472898 | BGIOSGA023218 | XP_015692781.1 thioredoxin-like 2, chloroplastic isoform X2                                                                                          |
| TCONS_00004741 | 0.578089 | -0.808349  | 0.61558     | BGIOSGA000474 |                                                                                                                                                      |
| TCONS_00014930 | 0.578309 | 0.471845   | 0.566201    | BGIOSGA003571 | XP_024317460.1protein ABHD18 isoform X2<br>XP_006647772.1 carbamoyl-phosphate synthase small chain, chloroplastic                                    |
| TCONS_00026562 | 0.578319 | -0.192778  | -0.401873   | BGIOSGA028624 | XP_015695790.1 multiple organellar RNA editing factor 9, chloroplastic-like                                                                          |
| TCONS_00018786 | 0.578335 | 0.778804   | 0.310835    | BGIOSGA018636 | XP_015695937.1 14-3-3-like protein GF14-C                                                                                                            |
| TCONS_00007528 | 0.579079 | 0.206963   | 0.456095    | BGIOSGA006956 |                                                                                                                                                      |
| TCONS_00006724 | 0.579143 | 0.563373   | 0.955472    | BGIOSGA008894 | XP_015695670.1 chaperone protein dnaJ 10-like<br>XP_002459987.1chlorophyll a-b binding protein of LHClI type 1                                       |
| TCONS_00027315 | 0.57963  | 1.1268     | 1.9449      | BGIOSGA035977 | XP_006650440.1 alkaline ceramidase 3<br>XP_006647401.1PREDICTED: uncharacterized protein LOC102700496                                                |
| TCONS_00028046 | 0.580139 | 0.468922   | -0.717283   | BGIOSGA028862 | XP_003573630.1protein ACCUMULATION AND REPLICATION OF CHLOROPLASTS 6, chloroplastic                                                                  |
| TCONS_00026969 | 0.580231 | 1.17125    | 1.62337     | BGIOSGA017636 | XP_021301782.1protein DETOXIFICATION 44, chloroplastic isoform X3                                                                                    |
| TCONS_00028707 | 0.580397 | -0.427858  | -1.03288    | BGIOSGA035064 | XP_006647617.1 GTP-binding protein YPTM2<br>XP_002460129.1GTP-binding protein BRASSINAZOLE INSENSITIVE PALE GREEN 2, chloroplastic                   |
| TCONS_00012998 | 0.580946 | 0.337529   | 0.580926    | BGIOSGA009988 | XP_015692431.1PREDICTED: uncharacterized protein LOC102700196                                                                                        |
| TCONS_00006294 | 0.581082 | 1.08394    | 0.986831    | BGIOSGA016497 | XP_015691838.1 WAT1-related protein At1g09380-like                                                                                                   |
| TCONS_00007263 | 0.581118 | 1.24576    | 1.64365     | BGIOSGA007219 | XP_015695449.1PREDICTED: uncharacterized protein LOC102716059                                                                                        |
| TCONS_00035440 | 0.581181 | -0.0883732 | 0.689806    | BGIOSGA034648 |                                                                                                                                                      |
| TCONS_00006565 | 0.581466 | 0.639619   | 0.245251    | BGIOSGA013829 | XP_006662655.1 macrophage migration inhibitory factor homolog isoform X2<br>XP_006655861.1 serine carboxypeptidase II-2 isoform X1                   |
| TCONS_00028858 | 0.581937 | 0.874153   | 0.74239     | BGIOSGA030608 | XP_006647542.2 phenylalanine ammonia-lyase<br>XP_006663203.1 cation/calcium exchanger 5<br>XP_021318113.1eukaryotic translation initiation factor 5B |
| TCONS_00002743 | 0.582003 | 0.474566   | 0.70255     | BGIOSGA002475 | NP_001150532.1lipid transfer protein precursor<br>XP_006654125.1 pseudo histidine-containing phosphotransfer protein 2                               |
| TCONS_00014250 | 0.582073 | -2.27803   | -0.208858   | BGIOSGA017391 | XP_003578091.1plant UBX domain-containing protein 2                                                                                                  |
| TCONS_00028204 | 0.58211  | 0.333305   | -0.473661   | BGIOSGA030937 | XP_015696212.1PREDICTED: uncharacterized protein LOC102703511                                                                                        |
| TCONS_00017640 | 0.582328 | -1.38472   | 1.36566     | #N/A          | #N/A                                                                                                                                                 |
| TCONS_00032821 | 0.582352 | -0.433128  | 0.111169    | BGIOSGA012069 | XP_004954347.128 kDa ribonucleoprotein, chloroplastic<br>XP_015696458.1 beta-amylase 2, chloroplastic-like                                           |
| TCONS_00021755 | 0.582691 | -0.771573  | -0.654441   | BGIOSGA016309 | XP_006649510.2 ethylene-responsive transcription factor 1-like<br>XP_015695836.1 probable 2-oxoglutarate-dependent dioxygenase AOP1                  |
| TCONS_00008417 | 0.58293  | -0.165464  | 1.59936     | BGIOSGA006000 | XP_006654623.2 signal recognition particle 54 kDa protein 2-like                                                                                     |
| TCONS_00034301 | 0.582937 | 0.343024   | 0.725322    | BGIOSGA016109 | XP_006651726.1 adenylosuccinate synthetase 2, chloroplastic                                                                                          |
| TCONS_00016247 | 0.583014 | 0.532086   | -0.127932   | BGIOSGA006018 | XP_006652325.1 26S proteasome non-ATPase regulatory subunit 11 homolog                                                                               |
| TCONS_00028376 | 0.583029 | -0.0548288 | 0.0160834   | BGIOSGA026587 | XP_006664021.1 protein yippee-like At4g27745<br>XP_015695157.1 thioredoxin H2-1-like<br>XP_003581460.3calcium-dependent protein kinase 27            |
| TCONS_00018749 | 0.583345 | -3.97077   | -1.73645    | BGIOSGA018672 | XP_004968693.1dihydropolyl dehydrogenase 1, chloroplastic                                                                                            |
| TCONS_00030010 | 0.583657 | 0.952008   | 0.582191    | BGIOSGA013186 |                                                                                                                                                      |
| TCONS_00026725 | 0.58367  | 1.52714    | 0.275115    | BGIOSGA005389 |                                                                                                                                                      |
| TCONS_00007099 | 0.584118 | 1.32838    | -0.506415   | BGIOSGA009608 |                                                                                                                                                      |
| TCONS_00029541 | 0.584142 | 0.885426   | -0.750065   | BGIOSGA024018 |                                                                                                                                                      |
| TCONS_00011680 | 0.584404 | 0.419459   | 1.58179     | BGIOSGA018232 |                                                                                                                                                      |
| TCONS_00028023 | 0.584597 | -1.40676   | -0.0707663  | BGIOSGA015022 |                                                                                                                                                      |
| TCONS_00019609 | 0.584665 | 0.956641   | 1.29634     | BGIOSGA004535 |                                                                                                                                                      |
| TCONS_00010764 | 0.58487  | 0.49138    | 1.16882     | BGIOSGA013389 |                                                                                                                                                      |
| TCONS_00010412 | 0.584991 | 0.602631   | 0.852548    | BGIOSGA016476 |                                                                                                                                                      |
| TCONS_00037188 | 0.585087 | 0.681625   | 0.985446    | BGIOSGA012031 |                                                                                                                                                      |
| TCONS_00024697 | 0.585176 | 0.86855    | 0.258888    | BGIOSGA019154 |                                                                                                                                                      |
| TCONS_00014664 | 0.585226 | 0.732466   | 0.565334    | BGIOSGA016828 |                                                                                                                                                      |
| TCONS_00000843 | 0.585284 | 1.3        | 1.53724     | BGIOSGA003432 |                                                                                                                                                      |

transcriptome

|                |          |            |             |               |                                                                                                                                           |
|----------------|----------|------------|-------------|---------------|-------------------------------------------------------------------------------------------------------------------------------------------|
| TCONS_00018872 | 0.585592 | 1.61925    | 1.4254      | BGIOSGA000017 | XP_006654164.1 eukaryotic translation initiation factor 3 subunit L-like<br>NP_001335912.1 late embryogenesis abundant protein            |
| TCONS_00018735 | 0.585736 | 0.142118   | -0.549884   | BGIOSGA018681 | XP_002444325.1 uncharacterized protein                                                                                                    |
| TCONS_00026596 | 0.585961 | 1.47194    | 0.440421    | BGIOSGA029045 | LOC8070074<br>XP_006656125.1 agamous-like MADS-box protein AGL62                                                                          |
| TCONS_00037049 | 0.586007 | 0.348275   | 1.25679     | BGIOSGA011317 | XP_006646020.1 calumenin-like                                                                                                             |
| TCONS_00003848 | 0.586248 | 0.686321   | 0.662101    | BGIOSGA009681 | XP_015690347.1 pentatricopeptide repeat-containing protein At2g16880-like                                                                 |
| TCONS_00009513 | 0.586346 | 1.54928    | 0.32257     | BGIOSGA012061 | XP_006654759.1 photosynthetic NDH subunit of subcomplex B 3, chloroplastic                                                                |
| TCONS_00019761 | 0.586371 | 0.341398   | -0.304136   | BGIOSGA017595 | XP_004981815.1 probable histone H2A variant 3                                                                                             |
| TCONS_00010933 | 0.586384 | 0.393231   | 0.895445    | BGIOSGA032925 | XP_006662512.1 pyridoxal reductase, chloroplastic                                                                                         |
| TCONS_00031465 | 0.586385 | 0.257681   | -0.00953728 | BGIOSGA033282 | XP_006644381.1 uroporphyrinogen decarboxylase 1, chloroplastic                                                                            |
| TCONS_00004007 | 0.586499 | 1.29969    | 1.20122     | BGIOSGA019256 | XP_006659465.1 1-phosphatidylinositol-3-phosphate 5-kinase FAB1B-like                                                                     |
| TCONS_00026705 | 0.586632 | 1.2023     | 0.80227     | BGIOSGA029792 | XP_015697919.1 phytosulfokines-like                                                                                                       |
| TCONS_00033657 | 0.586728 | -3.16807   | -0.541426   | BGIOSGA024896 | XP_015692216.1 neurofilament medium polypeptide-like                                                                                      |
| TCONS_00014126 | 0.58675  | 0.218564   | 0.923893    | BGIOSGA033025 | XP_006654252.1 reticulon-like protein B1                                                                                                  |
| TCONS_00019039 | 0.586769 | 1.01525    | -0.478038   | BGIOSGA030989 | XP_006656301.1 ATP synthase subunit O, mitochondrial                                                                                      |
| TCONS_00021144 | 0.587058 | 0.638394   | 0.321063    | BGIOSGA014555 | XP_006644825.1 nuclear transport factor 2-like                                                                                            |
| TCONS_00001955 | 0.587279 | -0.859563  | -0.968819   | BGIOSGA026589 | XP_006656175.1 ent-sandaracopimaradiene 3-hydroxylase-like                                                                                |
| TCONS_00022450 | 0.587378 | 0.487864   | 1.08461     | BGIOSGA033270 | XP_006657896.1 NADH dehydrogenase [ubiquinone] iron-sulfur protein 4, mitochondrial                                                       |
| TCONS_00025424 | 0.587419 | 0.606839   | -0.21207    | BGIOSGA023398 | XP_006661745.1 proteasome assembly chaperone 3                                                                                            |
| TCONS_00031044 | 0.587516 | 0.179975   | 1.42913     | BGIOSGA015758 | XP_008660489.1 uncharacterized protein                                                                                                    |
| TCONS_00011656 | 0.587748 | 0.6094     | -1.55498    | BGIOSGA011353 | LOC103639524                                                                                                                              |
| TCONS_00020087 | 0.587748 | 1.48387    | 1.90446     | #N/A          | #N/A                                                                                                                                      |
| TCONS_00035921 | 0.587919 | 1.13348    | -0.487388   | BGIOSGA037305 | XP_004962578.1 photosystem I reaction center subunit XI, chloroplastic                                                                    |
| TCONS_00019545 | 0.587975 | 1.16139    | 0.176107    | BGIOSGA013543 | XP_006654579.1 calmodulin-2                                                                                                               |
| TCONS_00003864 | 0.588159 | -0.774418  | -1.04786    | BGIOSGA020277 | XP_006644310.1 PREDICTED: uncharacterized protein LOC102717014 isoform X2                                                                 |
| TCONS_00029253 | 0.588197 | 1.02393    | 0.0288398   | #N/A          | #N/A                                                                                                                                      |
| TCONS_00026595 | 0.588231 | 0.0817596  | 0.82814     | BGIOSGA028661 | XP_006660127.1 5'-adenylylsulfate reductase-like 4                                                                                        |
| TCONS_00004768 | 0.588354 | 0.195087   | 0.67003     | BGIOSGA025888 | NP_001151279.1 uncharacterized<br>LOC100284912                                                                                            |
| TCONS_00029715 | 0.588415 | 0.60865    | 0.76525     | BGIOSGA029060 | XP_022679479.1 uncharacterized protein<br>LOC101761678 isoform X2                                                                         |
| TCONS_00002201 | 0.588526 | 0.731886   | 1.2165      | BGIOSGA016353 | XP_006645052.1 PREDICTED: uncharacterized protein LOC102722165 isoform X2                                                                 |
| TCONS_00032387 | 0.58853  | 0.162249   | 0.697797    | BGIOSGA031736 | XP_015697396.1 WD repeat-containing protein 26-like                                                                                       |
| TCONS_00024600 | 0.588751 | -0.627074  | 0.650902    | BGIOSGA025190 | XP_003579406.1 putative F-box/LRR-repeat protein At3g28410                                                                                |
| TCONS_00033031 | 0.588763 | 0.181862   | 0.556544    | BGIOSGA036575 | XP_006662760.1 PREDICTED: uncharacterized protein LOC102703623                                                                            |
| TCONS_00022425 | 0.588795 | -0.0658779 | 1.28221     | BGIOSGA002221 | XP_015693407.1 acid phosphatase 1-like                                                                                                    |
| TCONS_00024288 | 0.588876 | -0.587575  | 2.81953     | BGIOSGA013880 | XP_015695027.1 momilactone A synthase-like                                                                                                |
| TCONS_00006188 | 0.589044 | -1.39206   | 1.02669     | BGIOSGA030890 | XP_008783998.1 zinc finger A20 and AN1 domain-containing stress-associated protein 5                                                      |
| TCONS_00010963 | 0.589252 | 0.975282   | 0.140811    | BGIOSGA025518 | XP_006650589.1 protein-lysine N-methyltransferase N6amt2                                                                                  |
| TCONS_00012439 | 0.589556 | -0.849248  | -0.281562   | BGIOSGA010544 | XP_006651494.1 PREDICTED: uncharacterized protein LOC102714635                                                                            |
| TCONS_00003397 | 0.589838 | -0.0447318 | -0.139973   | BGIOSGA006341 | XP_006644110.1 calvin cycle protein CP12-1, chloroplastic                                                                                 |
| TCONS_00036769 | 0.590013 | 1.32944    | 0.210562    | BGIOSGA011870 | XP_021302175.1 uncharacterized protein<br>LOC8076284                                                                                      |
| TCONS_00018545 | 0.590108 | 1.13391    | 0.573003    | BGIOSGA018888 | XP_015693292.1 metal tolerance protein 1<br>XP_015697208.1 haloacid dehalogenase-like hydrolase domain-containing protein Sgpp isoform X1 |
| TCONS_00031657 | 0.590127 | 1.73994    | -0.26655    | BGIOSGA033472 | XP_021304755.1 ABC transporter G family member 11                                                                                         |
| TCONS_00030770 | 0.5902   | -0.978333  | -0.561198   | BGIOSGA028952 | XP_006652798.1 probable protein phosphatase 2C 44                                                                                         |
| TCONS_00016589 | 0.590269 | 0.209555   | 0.487656    | BGIOSGA024249 | XP_006652578.1 histidine triad nucleotide-binding protein 3                                                                               |
| TCONS_00016316 | 0.59038  | 0.794051   | 1.71137     | BGIOSGA014651 | XP_006662362.2 alpha-ketoglutarate-dependent dioxygenase alkB homolog 6                                                                   |
| TCONS_00032233 | 0.590387 | 0.876802   | 1.09296     | BGIOSGA026802 | XP_015693030.1 probable beta-1,3-galactosyltransferase 8 isoform X3                                                                       |
| TCONS_00019330 | 0.590462 | -0.179627  | 0.336673    | BGIOSGA034973 | NP_001150714.1 catalytic/oxidoreductase, acting on NADH or NADPH                                                                          |
| TCONS_00026177 | 0.590679 | 0.27113    | 0.643791    | BGIOSGA031950 | XP_006658043.1 uncharacterized GPI-anchored protein At5g19250-like                                                                        |
| TCONS_00025615 | 0.590841 | -5.90666   | -1.28626    | BGIOSGA023820 | XP_006644842.1 ethylene-responsive transcription factor 11                                                                                |
| TCONS_00001976 | 0.591007 | 0.0515762  | 1.06527     | BGIOSGA015096 | XP_006646271.1 probable starch synthase 4, chloroplastic/amyloplastic                                                                     |
| TCONS_00004309 | 0.591122 | -0.471354  | 1.17416     | BGIOSGA020250 | XP_003516788.1 mitochondrial import inner membrane translocase subunit TIM17-2                                                            |
| TCONS_00027732 | 0.591226 | 0.342406   | 1.02116     | #N/A          | #N/A                                                                                                                                      |
| TCONS_00025501 | 0.591385 | 0.342218   | 2.02075     | BGIOSGA023932 | XP_006663869.2 dynamin-like protein ARC5                                                                                                  |
| TCONS_00036789 | 0.59145  | 0.786246   | 1.00408     | BGIOSGA006063 | XP_015692366.1 cysteine proteinase 1-like                                                                                                 |
| TCONS_00013950 | 0.591471 | -0.515481  | -0.509876   | BGIOSGA029174 |                                                                                                                                           |

## transcriptome

|                |          |             |            |               |                                                                                                  |
|----------------|----------|-------------|------------|---------------|--------------------------------------------------------------------------------------------------|
| TCONS_00012185 | 0.591716 | 0.424236    | 0.422501   | BGIOSGA010820 | XP_006650018.1PREDICTED: uncharacterized protein LOC102715277                                    |
| TCONS_00015156 | 0.591848 | 1.86774     | 0.867575   | BGIOSGA024374 | XP_006653015.1 two-component response regulator ORR6-like                                        |
| TCONS_00004671 | 0.592143 | 1.34133     | -0.343741  | BGIOSGA000545 | XP_019709579.1 ATP-dependent Clp protease adapter protein CLPS1, chloroplastic-like              |
| TCONS_00024062 | 0.592437 | -0.721341   | -2.22976   | BGIOSGA023928 | XP_024312789.1 protein EGG APPARATUS-1-like                                                      |
| TCONS_00021360 | 0.592497 | 2.04517     | 0.611082   | BGIOSGA023588 | XP_004966407.1WAS/WASL-interacting protein family member 1                                       |
| TCONS_00006282 | 0.592503 | -0.00370744 | -0.0604815 | BGIOSGA008441 | XP_006647391.1 glyoxylate/succinic semialdehyde reductase 1                                      |
| TCONS_00008319 | 0.592556 | 1.41337     | 0.851203   | BGIOSGA014843 | XP_006647464.1 cytosolic Fe-S cluster assembly factor NBP35-like                                 |
| TCONS_00026489 | 0.592836 | 1.62738     | 0.502495   | BGIOSGA014371 | XP_006659350.1 iron-sulfur assembly protein IscA-like 2, mitochondrial                           |
| TCONS_00025552 | 0.592836 | 0.01857     | 0.432106   | BGIOSGA024293 | XP_006658848.1 non-specific lipid transfer protein-like 1                                        |
| TCONS_00015087 | 0.593011 | 0.44836     | 0.607945   | BGIOSGA017266 | XP_006652935.1 COP9 signalosome complex subunit 5b-like                                          |
| TCONS_00034322 | 0.593016 | -0.381411   | 0.905689   | BGIOSGA036616 | XP_006663219.1PREDICTED: uncharacterized protein OB11G0041L07_1                                  |
| TCONS_00007562 | 0.593294 | 0.433584    | 1.51946    | BGIOSGA023216 | XP_006647046.1PREDICTED: uncharacterized protein At2g34160-like                                  |
| TCONS_00021209 | 0.59335  | -2.98205    | -1.5692    | BGIOSGA000577 | XP_021306004.1RING-H2 finger protein ATL74                                                       |
| TCONS_00030363 | 0.593654 | 0.610983    | -0.161013  | BGIOSGA034507 | XP_022679893.1PHD finger protein rhinoceros                                                      |
| TCONS_00026681 | 0.594051 | 0.222895    | 0.834444   | BGIOSGA005420 | XP_006659453.2 calcineurin subunit B-like                                                        |
| TCONS_00031362 | 0.5945   | -2.56841    | #NA        | BGIOSGA037599 | XP_008663663.1putative ripening-related protein 5                                                |
| TCONS_00020429 | 0.594522 | 1.21263     | 1.45135    | BGIOSGA035978 | XP_006656838.1PREDICTED: uncharacterized protein LOC102716225                                    |
| TCONS_00022803 | 0.594633 | -0.130912   | 0.773132   | #N/A          | #N/A                                                                                             |
| TCONS_00015175 | 0.594708 | 0.186224    | 1.95094    | BGIOSGA017357 | XP_015691670.1 probable N-acetylglucosaminyl-phosphatidylinositol de-N-acetylase isoform X2      |
| TCONS_00010160 | 0.594708 | 0.823654    | 0.427375   | BGIOSGA027788 | XP_004984268.1 protein DMP2                                                                      |
| TCONS_00023716 | 0.594861 | 0.689634    | 0.63744    | BGIOSGA025754 | XP_006657728.1PREDICTED: uncharacterized protein LOC102717449                                    |
| TCONS_00004885 | 0.595543 | 0.529523    | 0.57907    | BGIOSGA000334 | NP_001130281.1IM30 protein-like protein                                                          |
| TCONS_00005732 | 0.595573 | -0.241544   | 0.205415   | BGIOSGA007847 | XP_006647107.1 actin-related protein 2/3 complex subunit 3                                       |
| TCONS_00005851 | 0.595662 | 1.82248     | 0.424972   | BGIOSGA007977 | XP_015689559.1 protein FAR1-RELATED SEQUENCE 5-like isoform X2                                   |
| TCONS_00037507 | 0.595662 | -2.24791    | -0.0725277 | BGIOSGA027060 | XP_004963131.1auxin-responsive protein SAUR71                                                    |
| TCONS_00021635 | 0.595716 | 1.20188     | 0.300917   | BGIOSGA016300 | XP_006655798.1 proteasome subunit beta type-5-A-like                                             |
| TCONS_00011173 | 0.596006 | 1.16669     | 1.483      | BGIOSGA022989 | XP_006650758.2 5'-adenylylsulfate reductase-like 5                                               |
| TCONS_00023024 | 0.596111 | 0.769921    | 0.642458   | BGIOSGA009647 | XP_004955369.1putative F-box/LRR-repeat protein At4g15060                                        |
| TCONS_00005544 | 0.596244 | 0.0489717   | -0.451246  | BGIOSGA007654 | NP_001150164.1fiber protein Fb15                                                                 |
| TCONS_00012569 | 0.596248 | 1.61806     | 0.963084   | BGIOSGA010407 | XP_006647303.1 DNA/RNA-binding protein KIN17                                                     |
| TCONS_00034262 | 0.596252 | -1.13762    | -0.198002  | BGIOSGA022288 | XP_006664849.1 mitochondrial acidic protein MAM33                                                |
| TCONS_00034214 | 0.596313 | 0.0360936   | 0.4203     | BGIOSGA036715 | XP_006664298.1 bifunctional aspartokinase/homoserine dehydrogenase 1 isoform X3                  |
| TCONS_00033317 | 0.59641  | -0.663885   | -0.99195   | BGIOSGA011300 | XP_006662894.1PREDICTED: uncharacterized protein LOC102700469                                    |
| TCONS_00018800 | 0.596524 | 0.347289    | -0.293919  | BGIOSGA018620 | XP_006655086.1PREDICTED: uncharacterized protein LOC102721554                                    |
| TCONS_00023424 | 0.596684 | 1.32719     | 1.2998     | BGIOSGA025457 | XP_006657589.1 putative S-adenosyl-L-methionine-dependent methyltransferase MAV_4873             |
| TCONS_00006763 | 0.597013 | 1.06078     | 0.576665   | BGIOSGA003635 | XP_006647803.1 fimbrin-4-like                                                                    |
| TCONS_00006532 | 0.597043 | 1.29853     | 0.354782   | BGIOSGA008699 | XP_004953257.1DEAD-box ATP-dependent RNA helicase 8                                              |
| TCONS_00000011 | 0.597499 | 0.32863     | -1.48729   | BGIOSGA002582 | XP_006643629.1 chaperone protein dnaJ 20, chloroplastic-like isoform X1                          |
| TCONS_00024674 | 0.597623 | 0.538022    | 0.693481   | BGIOSGA009639 | XP_006657506.1 tryptophan synthase alpha chain-like                                              |
| TCONS_00036827 | 0.59806  | -0.481135   | 0.23036    | BGIOSGA034277 | XP_006663894.1 DNA-directed RNA polymerases I and III subunit RPAC2                              |
| TCONS_00015548 | 0.598075 | 0.263628    | 0.596441   | BGIOSGA015424 | XP_015691329.1PREDICTED: uncharacterized protein LOC102717513                                    |
| TCONS_00029711 | 0.598265 | -0.766056   | -0.301113  | BGIOSGA030112 | XP_006660480.1 nucleoporin GLE1-like                                                             |
| TCONS_00029185 | 0.598434 | 0.692913    | 0.882369   | BGIOSGA021768 | XP_006660719.1 phosphoribosylaminoimidazole-succinocarboxamide synthase, chloroplastic           |
| TCONS_00023642 | 0.598487 | -0.632782   | 1.44064    | BGIOSGA011918 | XP_023157558.1mitochondrial fission regulator 1-like                                             |
| TCONS_00023565 | 0.598492 | -1.29993    | 0.0445549  | BGIOSGA025595 | XP_006658507.1 photosystem I reaction center subunit IV, chloroplastic-like                      |
| TCONS_00004853 | 0.598554 | 0.450774    | 0.670398   | BGIOSGA019891 | XP_015692262.1 UPF0301 protein Cag_1601-like                                                     |
| TCONS_00023475 | 0.598635 | 1.06142     | 0.88389    | BGIOSGA013925 | XP_010228177.1serine/threonine protein phosphatase 2A 57 kDa regulatory subunit B' theta isoform |
| TCONS_00007575 | 0.598666 | 0.796432    | 0.904101   | BGIOSGA011435 | XP_006647057.1 26S protease regulatory subunit 8 homolog A                                       |
| TCONS_00000019 | 0.599525 | -0.182392   | 0.585199   | BGIOSGA002230 | XP_015694374.1PREDICTED: uncharacterized protein LOC102710794                                    |
| TCONS_00016537 | 0.599607 | 1.60143     | 0.853644   | BGIOSGA033797 | XP_006652741.1 secretory carrier-associated membrane protein 6                                   |

## transcriptome

|                |          |             |            |               |                                                                                                                                                            |
|----------------|----------|-------------|------------|---------------|------------------------------------------------------------------------------------------------------------------------------------------------------------|
| TCONS_00012892 | 0.599612 | 0.217962    | 0.363282   | BGIOSGA010091 | XP_004976546.1nucleoporin NSP1 isoform X1                                                                                                                  |
| TCONS_00007135 | 0.600353 | 0.654855    | 0.472051   | BGIOSGA023653 | XP_006648148.1 signal peptide peptidase-like 4<br>XP_021308134.1putative leucine-rich repeat<br>receptor-like serine/threonine-protein kinase<br>At2g04300 |
| TCONS_00008840 | 0.600402 | -1.06357    | 0.326698   | BGIOSGA036737 | XP_015695871.1 BTB/POZ and MATH domain-<br>containing protein 2-like                                                                                       |
| TCONS_00027589 | 0.600404 | 2.25707     | 0.872513   | BGIOSGA015988 | XP_006659718.1 mitochondrial import receptor<br>subunit TOM9-2-like                                                                                        |
| TCONS_00006097 | 0.600721 | 0.584838    | 0.470399   | BGIOSGA007466 | XP_006664931.1 glyoxylate/hydroxypyruvate<br>reductase HPR3-like                                                                                           |
| TCONS_00013608 | 0.601393 | 1.46733     | -0.589378  | BGIOSGA015727 | XP_004951637.1probable glycosyltransferase<br>At5g03795                                                                                                    |
| TCONS_00007485 | 0.601393 | 1.09536     | 0.995584   | BGIOSGA023333 | XP_006655726.1 syntaxin-43-like                                                                                                                            |
| TCONS_00021495 | 0.601489 | 0.979758    | 1.32465    | BGIOSGA022055 | XP_004977234.1myb-related protein Zm38                                                                                                                     |
| TCONS_00035662 | 0.601582 | -3.57731    | -3.17481   | BGIOSGA019700 | XP_006649592.1 DNA repair protein UVH3<br>isoform X1                                                                                                       |
| TCONS_00009526 | 0.601583 | 1.59625     | 1.08768    | BGIOSGA012074 | XP_010504143.1 histone H4                                                                                                                                  |
| TCONS_00023884 | 0.6017   | -0.0226124  | 0.864626   | BGIOSGA011733 | XP_006643700.1 transcription repressor MYB4-<br>like                                                                                                       |
| TCONS_00002748 | 0.601739 | 0.122935    | 1.14673    | BGIOSGA007609 | XP_004951835.1probable arabinose 5-<br>phosphate isomerase                                                                                                 |
| TCONS_00005461 | 0.601803 | -1.83216    | -1.03401   | BGIOSGA007570 | XP_006647628.1 acetylglutamate kinase-like                                                                                                                 |
| TCONS_00006582 | 0.601846 | 0.0947859   | -0.590504  | BGIOSGA016885 | NP_001141133.1putative HSP20-like chaperone<br>domain family protein                                                                                       |
| TCONS_00008798 | 0.601949 | 1.88166     | 1.28371    | BGIOSGA022590 | XP_006658050.2 BTB/POZ and MATH domain-<br>containing protein 1-like                                                                                       |
| TCONS_00024253 | 0.60213  | 1.10498     | 0.821007   | BGIOSGA022503 | XP_002437974.1pentatricopeptide repeat-<br>containing protein At3g25210, mitochondrial                                                                     |
| TCONS_00021749 | 0.602612 | 0.508858    | 0.822632   | BGIOSGA038193 | XP_004953470.1uncharacterized protein<br>LOC101766680                                                                                                      |
| TCONS_00008595 | 0.602662 | -1.21367    | -0.850649  | BGIOSGA014487 | XP_003579865.1RING-H2 finger protein ATL52                                                                                                                 |
| TCONS_00015987 | 0.603007 | 1.07827     | 0.0470735  | BGIOSGA033400 | XP_021317386.1putative protease Do-like 14<br>isoform X1                                                                                                   |
| TCONS_00033236 | 0.603345 | 0.742401    | 1.28025    | BGIOSGA021834 | XP_006661977.1 glutathione S-transferase U17-<br>like                                                                                                      |
| TCONS_00032601 | 0.603399 | 1.33621     | 0.154418   | BGIOSGA005166 | XP_006645040.1 nematode resistance protein-<br>like HSPRO1                                                                                                 |
| TCONS_00004749 | 0.603687 | 1.62392     | 1.00697    | BGIOSGA029105 | XP_006659650.1 ankyrin repeat-containing<br>protein At5g02620-like                                                                                         |
| TCONS_00027048 | 0.604149 | 0.389089    | 0.961789   | BGIOSGA034060 | XP_022680914.1probable protein phosphatase<br>2C 45 isoform X2                                                                                             |
| TCONS_00016787 | 0.60461  | 0.579955    | 0.328279   | BGIOSGA007546 | XP_006649962.2 bifunctional TENA2 protein                                                                                                                  |
| TCONS_00012124 | 0.604707 | 0.196401    | 0.547071   | BGIOSGA010885 | XP_006651844.1 serine/threonine-protein kinase<br>SAPK8                                                                                                    |
| TCONS_00011017 | 0.605099 | 1.23583     | 1.50358    | BGIOSGA026164 | XP_015693153.1 inactive protein kinase<br>SELMODRAFT_444075-like                                                                                           |
| TCONS_00019904 | 0.605229 | 0.204704    | 1.96184    | BGIOSGA028172 | XP_006657468.1 small RNA 2'-O-<br>methyltransferase-like                                                                                                   |
| TCONS_00024618 | 0.605731 | 0.767976    | 0.778404   | BGIOSGA024768 | XP_006649826.1 tropinone reductase homolog<br>At5g06060-like                                                                                               |
| TCONS_00011981 | 0.606    | 0.016363    | 0.303082   | BGIOSGA033070 | XP_006652418.1 protein FLX-like 2                                                                                                                          |
| TCONS_00016104 | 0.606158 | 0.431672    | 0.568079   | BGIOSGA014874 | XP_006651108.1PREDICTED: uncharacterized<br>protein LOC102707853, partial                                                                                  |
| TCONS_00009453 | 0.606241 | 1.161       | 1.69142    | BGIOSGA027984 | XP_004970279.1probable E3 ubiquitin-protein<br>ligase RHC1A                                                                                                |
| TCONS_00019556 | 0.607224 | -0.00472235 | -0.518115  | BGIOSGA031655 | NP_001148225.1catalytic/ hydrolase                                                                                                                         |
| TCONS_00031480 | 0.607283 | -0.47299    | -0.633929  | BGIOSGA016354 | XP_002454776.1haloacid dehalogenase-like<br>hydrolase domain-containing protein At2g33255<br>isoform X3                                                    |
| TCONS_00009039 | 0.607312 | 0.40306     | -0.328945  | BGIOSGA005367 | XP_006644712.1 FBD-associated F-box protein<br>At4g10400-like                                                                                              |
| TCONS_00001834 | 0.607472 | 0.821923    | 0.537179   | BGIOSGA018721 | XP_015690928.1 PT11-like tyrosine-protein<br>kinase 1                                                                                                      |
| TCONS_00013521 | 0.607593 | 0.265365    | 0.483072   | BGIOSGA036821 | XP_015691981.1PREDICTED: uncharacterized<br>protein LOC102710060                                                                                           |
| TCONS_00002927 | 0.608254 | 0.0636225   | -1.46762   | BGIOSGA007462 | XP_015695703.1 syntaxin-52-like                                                                                                                            |
| TCONS_00026276 | 0.608274 | 0.689215    | 1.46499    | BGIOSGA007237 | XP_006645133.1 MADS-box transcription factor<br>2                                                                                                          |
| TCONS_00004842 | 0.608555 | 1.87075     | 0.823097   | BGIOSGA026745 | XP_006653068.2 cationic peroxidase SPC4-like                                                                                                               |
| TCONS_00016920 | 0.608792 | 1.18834     | 1.58118    | BGIOSGA011560 | XP_003563429.1uncharacterized protein<br>LOC100845879                                                                                                      |
| TCONS_00031561 | 0.609022 | 0.257938    | 1.82655    | BGIOSGA033379 | XP_006660552.1 ubiquitin domain-containing<br>protein 1-like                                                                                               |
| TCONS_00029876 | 0.609092 | -0.19389    | 0.274862   | BGIOSGA000871 | XP_006663907.1 AP-2 complex subunit sigma                                                                                                                  |
| TCONS_00035734 | 0.609476 | 0.12605     | -0.737251  | BGIOSGA028614 | XP_015694048.1 ATP-dependent zinc<br>metalloprotease FTSH 2, chloroplastic                                                                                 |
| TCONS_00022747 | 0.609505 | 0.322385    | -0.290879  | BGIOSGA014928 | XP_003576120.1uncharacterized protein<br>LOC100829625                                                                                                      |
| TCONS_00015995 | 0.610047 | 0.269215    | 0.61776    | BGIOSGA019588 |                                                                                                                                                            |
| TCONS_00011583 | 0.610355 | 0.960221    | 0.536863   | BGIOSGA026897 | XP_015689765.1 4-coumarate--CoA ligase-like 1<br>XP_006646457.1 putative respiratory burst<br>oxidase homolog protein H                                    |
| TCONS_00002125 | 0.610407 | -0.809873   | -1.88125   | BGIOSGA033858 | XP_006645290.1 protein SRG1-like                                                                                                                           |
| TCONS_00005048 | 0.610412 | 0.198449    | -0.378483  | BGIOSGA010948 | XP_006652112.1 probable E3 ubiquitin-protein<br>ligase HIP1                                                                                                |
| TCONS_00013753 | 0.611006 | 0.798552    | 0.971524   | BGIOSGA015516 | XP_002455034.1serine/threonine-protein kinase<br>tricornet                                                                                                 |
| TCONS_00002985 | 0.611219 | 1.36326     | 0.566148   | BGIOSGA037254 | XP_015691034.1 magnesium-chelatase subunit<br>Chil, chloroplastic                                                                                          |
| TCONS_00012550 | 0.611813 | 0.197329    | 0.0695137  | BGIOSGA012976 | XP_004970953.1protein PLASTID<br>TRANSCRIPTIONALLY ACTIVE 10                                                                                               |
| TCONS_00004910 | 0.611847 | 1.67885     | 1.88746    | BGIOSGA000311 | XP_015695712.1 succinate dehydrogenase<br>subunit 6, mitochondrial                                                                                         |
| TCONS_00027240 | 0.612069 | 0.478714    | 0.00366606 | BGIOSGA013603 |                                                                                                                                                            |

transcriptome

|                |          |            |             |               |                                                                                                        |
|----------------|----------|------------|-------------|---------------|--------------------------------------------------------------------------------------------------------|
| TCONS_00016848 | 0.612078 | 0.913286   | 0.564648    | BGIOSGA022626 | XP_006653008.1 inactive poly [ADP-ribose] polymerase RCD1-like isoform X2                              |
| TCONS_00028438 | 0.612203 | 0.303064   | -0.329444   | BGIOSGA023006 | XP_015696191.1 probable L-ascorbate peroxidase 4 isoform X2                                            |
| TCONS_00028677 | 0.612258 | -0.492784  | -1.04772    | BGIOSGA030426 | XP_006660493.1 scyllo-inositol 2-dehydrogenase (NADP(+))                                               |
| TCONS_00007127 | 0.612305 | 0.38098    | 0.491529    | BGIOSGA009311 | XP_006648139.1 ATG8-interacting protein 1-like                                                         |
| TCONS_00020781 | 0.61269  | 1.29296    | 0.933415    | BGIOSGA016458 | XP_006656111.1 GTP-binding protein BRASSINAZOLE INSENSITIVE PALE GREEN 2, chloroplastic-like           |
| TCONS_00000901 | 0.612874 | 0.451408   | 0.490877    | BGIOSGA025478 | XP_006660454.1 pentatricopeptide repeat-containing protein At4g14850-like                              |
| TCONS_00028583 | 0.613601 | 0.672673   | 0.62069     | BGIOSGA030328 | XP_004970801.1 protein CLMP1                                                                           |
| TCONS_00015141 | 0.613768 | 0.35795    | 0.724552    | BGIOSGA011760 | XP_008437332.1 heavy metal-associated isoprenylated plant protein 3                                    |
| TCONS_00011355 | 0.613874 | 1.06835    | 0.956126    | BGIOSGA013967 | XP_006650918.1 PREDICTED: uncharacterized protein LOC102719753                                         |
| TCONS_00030741 | 0.614256 | -1.95473   | -0.332775   | BGIOSGA015511 | XP_010234589.1 probable amidase At4g34880 NP_001152518.110-deacetylacetic acid 10-O-acetyltransferase  |
| TCONS_00035780 | 0.614423 | 0.845795   | -2.49125    | BGIOSGA020552 | XP_006660189.1 cytokinin dehydrogenase 11                                                              |
| TCONS_00028122 | 0.614663 | -1.20026   | -0.35604    | BGIOSGA026866 | XP_006654285.1 ran-binding protein 1 homolog c                                                         |
| TCONS_00017604 | 0.614665 | 1.88259    | 0.760946    | BGIOSGA010940 | XP_006649252.1 PREDICTED: uncharacterized protein LOC102706920                                         |
| TCONS_00009167 | 0.614706 | -2.02129   | -0.64377    | BGIOSGA011693 | XP_006650885.1 serine/threonine protein phosphatase 2A 57 kDa regulatory subunit B' theta isoform-like |
| TCONS_00011318 | 0.614968 | 0.773383   | 0.0444617   | BGIOSGA025510 | XP_006659305.1 50S ribosomal protein L15                                                               |
| TCONS_00026357 | 0.615039 | 1.46408    | 0.606165    | BGIOSGA028210 | #N/A                                                                                                   |
| TCONS_00025951 | 0.615141 | 1.86374    | 1.13615     | #N/A          | XP_015696147.1 serine/threonine-protein kinase STY8-like                                               |
| TCONS_00027190 | 0.615172 | 0.209427   | 1.17696     | BGIOSGA025359 | XP_006651553.1 haloacid dehalogenase-like hydrolase domain-containing protein At3g48420                |
| TCONS_00010395 | 0.615357 | -1.01507   | -0.699875   | BGIOSGA012984 | XP_004960168.1 protein HEAT INTOLERANT 4                                                               |
| TCONS_00008083 | 0.615365 | 0.673567   | 1.12762     | BGIOSGA014172 | XP_006650369.2 cytochrome P450 87A3-like                                                               |
| TCONS_00012860 | 0.615365 | #NA        | -2.78265    | BGIOSGA032721 | XP_015695342.1 D-lactate dehydrogenase [cytochrome], mitochondrial                                     |
| TCONS_00024615 | 0.615429 | 0.827726   | 0.0547137   | BGIOSGA024772 | XP_006643786.1 dehydration-responsive element-binding protein 2A                                       |
| TCONS_00000267 | 0.615476 | 0.0484863  | 0.520187    | BGIOSGA002326 | XP_015694631.1 PREDICTED: uncharacterized protein At4g14100-like, partial                              |
| TCONS_00023656 | 0.61584  | -0.102256  | 0.192309    | BGIOSGA000751 | XP_003580790.1 plant UBX domain-containing protein 7                                                   |
| TCONS_00015152 | 0.615917 | 0.873776   | 0.918891    | BGIOSGA017332 | XP_006652014.1 probable thiol methyltransferase 2                                                      |
| TCONS_00011315 | 0.616483 | -0.025053  | -3.31928    | BGIOSGA033366 | XP_006644121.1 malignant T-cell-amplified sequence 1 homolog                                           |
| TCONS_00003426 | 0.61652  | 0.157236   | 0.301104    | BGIOSGA001792 | XP_004975358.1 TBC1 domain family member 13                                                            |
| TCONS_00014073 | 0.616613 | 0.565116   | 1.00807     | BGIOSGA000293 | XP_020395337.1 succinate dehydrogenase subunit 8A, mitochondrial                                       |
| TCONS_00020031 | 0.616737 | 0.0448319  | 1.13178     | BGIOSGA022029 | XP_006646669.1 putative tyrosine-protein phosphatase OCA1                                              |
| TCONS_00002498 | 0.616783 | -0.133471  | 0.147274    | BGIOSGA009736 | XP_015697812.1 mini-ribonuclease 3-like                                                                |
| TCONS_00034579 | 0.616876 | 0.913049   | 0.117141    | BGIOSGA031884 | XP_015688548.1 PREDICTED: uncharacterized protein LOC102709816                                         |
| TCONS_00007767 | 0.617014 | 0.239189   | 0.426158    | BGIOSGA006718 | XP_006661688.1 probable chromo domain-containing protein LHP1                                          |
| TCONS_00030889 | 0.617138 | 0.343605   | 0.0363167   | BGIOSGA032692 | XP_006652543.1 PREDICTED: uncharacterized protein LOC102715655                                         |
| TCONS_00014640 | 0.617269 | 1.63118    | 1.55879     | BGIOSGA024158 | XP_002456719.1 myb-related protein 308                                                                 |
| TCONS_00002265 | 0.617549 | -1.45884   | -0.226917   | BGIOSGA016295 | XP_002444685.1 mitochondrial import inner membrane translocase subunit TIM8                            |
| TCONS_00028383 | 0.617765 | -0.240542  | 1.11644     | BGIOSGA026579 | XP_006648034.1 probable alpha, alpha-trehalose-phosphate synthase [UDP-forming] 8                      |
| TCONS_00007001 | 0.618181 | -0.97141   | 0.593276    | BGIOSGA020196 | XP_015695392.1 calcium-binding protein 39-like                                                         |
| TCONS_00024221 | 0.618329 | -0.476181  | 1.21254     | BGIOSGA007293 | XP_003576098.1 phosphoserine phosphatase, chloroplastic                                                |
| TCONS_00037230 | 0.618455 | -0.204424  | -0.739241   | BGIOSGA033670 | XP_006658029.1 eukaryotic translation initiation factor 6-2                                            |
| TCONS_00024196 | 0.618539 | 0.0662497  | 0.168476    | BGIOSGA037064 | XP_006646563.1 pentatricopeptide repeat-containing protein At3g02650, mitochondrial                    |
| TCONS_00002339 | 0.618626 | 1.09575    | 1.07136     | BGIOSGA004981 | XP_006653699.1 PREDICTED: uncharacterized protein LOC102717895                                         |
| TCONS_00014803 | 0.618677 | 0.358784   | -1.08745    | BGIOSGA016973 | XP_006648496.1 probable splicing factor 3A subunit 1                                                   |
| TCONS_00005761 | 0.618694 | 0.171489   | 0.912161    | BGIOSGA007873 | XP_006645098.1 ubiquitin-like domain-containing CTD phosphatase                                        |
| TCONS_00004813 | 0.618842 | 0.697151   | 1.06075     | BGIOSGA000402 | XP_004968528.1 uncharacterized protein LOC101768011                                                    |
| TCONS_00036222 | 0.619281 | -0.344031  | 0.126021    | BGIOSGA027306 | XP_004963393.1 uncharacterized protein LOC101785360                                                    |
| TCONS_00016786 | 0.619724 | -0.0863729 | 0.627292    | BGIOSGA014181 | XP_015694902.1 mitochondrial import inner membrane translocase subunit TIM14-1-like                    |
| TCONS_00002863 | 0.619759 | 0.710127   | 0.382984    | BGIOSGA013655 | XP_015690581.1 PREDICTED: uncharacterized protein LOC102721626                                         |
| TCONS_00012450 | 0.619787 | -0.292317  | 0.000750517 | BGIOSGA012866 | XP_006645239.1 stearyl-[acyl-carrier-protein] 9-desaturase 2, chloroplastic                            |
| TCONS_00004980 | 0.619968 | 0.709933   | 0.510378    | BGIOSGA015218 | XP_008647952.1 ATOZ1 isoform X1                                                                        |
| TCONS_00020000 | 0.619969 | 0.656022   | 0.437881    | BGIOSGA014797 | XP_015689512.1 probable glucuronosyltransferase Os02g0520750                                           |
| TCONS_00008088 | 0.620072 | 1.17032    | 0.703993    | BGIOSGA032223 | XP_006654066.1 nifU-like protein 4, mitochondrial                                                      |
| TCONS_00017165 | 0.62019  | 0.0705411  | 1.55228     | BGIOSGA019211 | XP_015693534.1 bifunctional nuclease 1                                                                 |
| TCONS_00004251 | 0.620816 | 2.18542    | 2.14573     | BGIOSGA027113 |                                                                                                        |



transcriptome

|                |          |            |            |               |                                                                                     |
|----------------|----------|------------|------------|---------------|-------------------------------------------------------------------------------------|
| TCONS_00024647 | 0.621126 | 0.464845   | 0.917729   | BGIOSGA024740 | XP_006657491.1 DNA-directed RNA polymerases II, IV and V subunit 11-like            |
| TCONS_00022157 | 0.621133 | 1.3279     | 0.447005   | BGIOSGA019369 | XP_004985587.1 protein PAM68, chloroplastic                                         |
| TCONS_00004695 | 0.621528 | 1.04283    | 1.06739    | BGIOSGA001568 | XP_004970520.1 histone H2B.11                                                       |
| TCONS_00026519 | 0.621542 | -1.16823   | 0.182294   | BGIOSGA028585 | XP_006659366.1 peptidyl-prolyl cis-trans isomerase, chloroplastic                   |
| TCONS_00018360 | 0.621569 | 1.53488    | 0.915994   | BGIOSGA033173 | XP_015692708.1 pentatricopeptide repeat-containing protein At1g15510, chloroplastic |
| TCONS_00004233 | 0.621637 | 1.20925    | -0.0254244 | BGIOSGA019930 | XP_006644533.2 ABC transporter B family member 4-like                               |
| TCONS_00037306 | 0.621724 | -0.203151  | 0.300287   | BGIOSGA036060 | XP_006664077.1 probable 2,3-bisphosphoglycerate-independent phosphoglycerate mutase |
| TCONS_00002059 | 0.622022 | -0.62334   | 0.785463   | BGIOSGA034601 | XP_004970372.1 protein LURP-one-related 8                                           |
| TCONS_00028075 | 0.622323 | -1.13157   | -0.959634  | BGIOSGA032209 | XP_002445566.1 cinamoyl-CoA reductase 1                                             |
| TCONS_00032066 | 0.622394 | -0.352531  | -0.131936  | BGIOSGA032072 | XP_015697332.1 myosin-11 isoform X2                                                 |
| TCONS_00022226 | 0.622406 | 0.525037   | 0.0758741  | BGIOSGA001926 | XP_015689417.1 probable peroxxygenase 5                                             |
| TCONS_00002167 | 0.622484 | 0.573982   | -2.02281   | BGIOSGA017929 | XP_006645007.1 aldo-keto reductase family 4 member C9-like                          |
| TCONS_00032449 | 0.622589 | 0.702928   | 1.03161    | BGIOSGA013953 | XP_002464470.1 basic transcription factor 3                                         |
| TCONS_00028198 | 0.622712 | 0.390427   | 0.57676    | BGIOSGA030940 | XP_015695708.1 dicarboxylate transporter 2.1, chloroplastic-like                    |
| TCONS_00007248 | 0.622937 | 0.23232    | 0.200434   | BGIOSGA007238 | XP_006646792.2 AUGMIN subunit 4                                                     |
| TCONS_00008303 | 0.623102 | 1.23195    | 1.48446    | BGIOSGA006125 | XP_006647454.2 protein GLE1                                                         |
| TCONS_00004129 | 0.623355 | 0.617356   | 1.26335    | BGIOSGA001064 | XP_006644484.1 PREDICTED: uncharacterized protein At4g18257                         |
| TCONS_00019027 | 0.623495 | 0.33828    | 0.284262   | BGIOSGA018332 | XP_006655180.1 PREDICTED: uncharacterized protein LOC102715210                      |
| TCONS_00027011 | 0.623726 | -0.0969706 | 1.21219    | BGIOSGA029059 | XP_006659631.1 PREDICTED: uncharacterized protein LOC102703605                      |
| TCONS_00007933 | 0.623861 | 0.616413   | 1.12077    | BGIOSGA006554 | XP_003573060.2 probable diaminopimelate decarboxylase, chloroplastic                |
| TCONS_00011756 | 0.62443  | -1.68974   | 0.29554    | BGIOSGA025281 | XP_015689808.1 QWRF motif-containing protein 2                                      |
| TCONS_00031970 | 0.624499 | 0.848645   | 0.369005   | BGIOSGA016873 | XP_006662256.1 probable glucuronosyltransferase Os10g0205300                        |
| TCONS_00014670 | 0.624552 | -0.111354  | 0.169398   | BGIOSGA012640 | XP_015691324.1 indole-3-acetic acid-induced protein ARG7                            |
| TCONS_00028607 | 0.624738 | 0.172399   | -0.632859  | BGIOSGA030358 | XP_006662124.2 ferredoxin-thioredoxin reductase catalytic chain, chloroplastic      |
| TCONS_00026769 | 0.6249   | 1.08728    | 0.76004    | BGIOSGA026419 | XP_004973666.1 bZIP transcription factor TRAB1                                      |
| TCONS_00007831 | 0.62492  | 1.16607    | 0.583192   | BGIOSGA004524 | XP_006647188.1 protein PAT1 homolog 1-like                                          |
| TCONS_00010951 | 0.625215 | 0.0238665  | -0.408745  | BGIOSGA031053 | XP_006650581.1 cysteine synthase                                                    |
| TCONS_00002183 | 0.625491 | 0.712565   | 0.598865   | BGIOSGA029234 | XP_006645033.1 leucine-rich repeat extensin-like protein 3                          |
| TCONS_00016975 | 0.625795 | 0.00898561 | 0.529206   | BGIOSGA025983 | XP_010231854.1 probable serine/threonine-protein kinase WNK2                        |
| TCONS_00029606 | 0.625941 | 0.356174   | 0.922031   | BGIOSGA020802 | XP_006660421.1 PREDICTED: uncharacterized protein LOC102700645                      |
| TCONS_00035601 | 0.626037 | 0.228809   | -0.123466  | BGIOSGA006048 | XP_006663828.1 UDP-galactose transporter 2-like                                     |
| TCONS_00015147 | 0.626068 | 0.830981   | -0.224668  | BGIOSGA031049 | XP_004960228.1 uncharacterized protein LOC101760494                                 |
| TCONS_00003030 | 0.62623  | 0.524053   | 0.379263   | BGIOSGA031410 | XP_006662599.1 autophagy-related protein 3                                          |
| TCONS_00023194 | 0.62637  | -1.62883   | -1.81038   | BGIOSGA026002 | XP_006657880.1 glutamic acid-rich protein-like                                      |
| TCONS_00009403 | 0.626573 | 1.21254    | -0.451897  | BGIOSGA022524 | XP_006649479.2 aianine-glyoxylate aminotransferase 2 homolog 1, mitochondrial       |
| TCONS_00004583 | 0.626712 | 0.995974   | 1.22798    | BGIOSGA020095 | XP_015699200.1 stomatal closure-related actin-binding protein 1-like isoform X1     |
| TCONS_00006427 | 0.626907 | -0.0642713 | 1.26364    | BGIOSGA008591 | XP_006648822.1 nicotinamidase 1                                                     |
| TCONS_00006191 | 0.62701  | -0.63444   | 0.0384969  | BGIOSGA008354 | XP_006647338.2 probable sodium/metabolite cotransporter BASS4, chloroplastic        |
| TCONS_00018540 | 0.627026 | 1.67334    | 1.21138    | BGIOSGA018897 | XP_006654947.1 PREDICTED: uncharacterized protein LOC102699867                      |
| TCONS_00003313 | 0.627071 | 1.19471    | 0.860299   | BGIOSGA012532 | XP_006644056.1 mitochondrial import receptor subunit TOM40-1-like                   |
| TCONS_00034462 | 0.627289 | -0.567421  | -0.604516  | BGIOSGA016215 | XP_006662803.1 probable magnesium transporter NIP44                                 |
| TCONS_00023390 | 0.627331 | -0.334957  | -0.146301  | BGIOSGA033522 | XP_006657579.1 vacuolar protein sorting-associated protein 2 homolog 1-like         |
| TCONS_00009189 | 0.627443 | 0.259478   | 0.463511   | BGIOSGA037765 | XP_006649272.2 F-box protein At4g00755-like                                         |
| TCONS_00037275 | 0.628306 | 0.294805   | -0.513734  | BGIOSGA032551 | XP_006664062.1 polyol transporter 5-like                                            |
| TCONS_00021070 | 0.628544 | 1.3833     | 0.941035   | BGIOSGA030286 | XP_004965828.1 peroxiredoxin-2E-1, chloroplastic                                    |
| TCONS_00015842 | 0.628646 | -0.968054  | 0.254664   | BGIOSGA015142 | XP_004975537.1 DNA-binding protein S1FA2                                            |
| TCONS_00011798 | 0.628968 | -0.265526  | -0.418312  | BGIOSGA011207 | XP_015690350.1 PREDICTED: uncharacterized protein LOC107303832                      |
| TCONS_00018411 | 0.629182 | 0.236121   | 0.927779   | BGIOSGA020463 | XP_006654853.2 protein PLASTID TRANSCRIPTIONALLY ACTIVE 14                          |
| TCONS_00007014 | 0.629392 | 0.589755   | 0.50405    | BGIOSGA028758 | XP_006649126.1 PREDICTED: uncharacterized protein LOC102706173                      |
| TCONS_00034162 | 0.629527 | -0.95705   | 0.362289   | BGIOSGA036771 | XP_006664867.1 PREDICTED: uncharacterized protein LOC102702156                      |
| TCONS_00009000 | 0.63007  | 0.685017   | 0.550701   | BGIOSGA004605 | XP_015689503.1 PAP-specific phosphatase HAL2-like                                   |
| TCONS_00007557 | 0.630401 | -0.0667624 | -0.643678  | BGIOSGA021469 | XP_004951536.1 uncharacterized protein LOC101765845                                 |
| TCONS_00021381 | 0.630478 | 1.91662    | 0.408708   | BGIOSGA020527 | XP_006657350.1 endoplasmic homolog NP_001334047.1 uncharacterized                   |
| TCONS_00024682 | 0.630518 | -2.78118   | -0.964528  | BGIOSGA019111 | LOC100275286                                                                        |
| TCONS_00017885 | 0.630563 | 1.39903    | 0.387982   | BGIOSGA011140 | XP_006654466.1 U-box domain-containing protein 29-like                              |
| TCONS_00035581 | 0.6307   | -0.0598997 | 0.353118   | BGIOSGA019079 | XP_006663080.2 PREDICTED: uncharacterized protein LOC102711651, partial             |

transcriptome

|                |          |             |           |               |                                                                                                     |
|----------------|----------|-------------|-----------|---------------|-----------------------------------------------------------------------------------------------------|
| TCONS_00010047 | 0.630723 | -0.403359   | 1.59118   | BGIOSGA014208 | XP_012698589.1.alpha-N-acetylglucosaminidase isoform X1                                             |
| TCONS_00006373 | 0.631057 | 1.04717     | 0.156896  | BGIOSGA004471 | XP_006648805.1 elongation factor Tu, chloroplastic                                                  |
| TCONS_00022954 | 0.631391 | -0.00299229 | 0.660218  | BGIOSGA020493 | XP_006657375.2.PREDICTED: uncharacterized protein LOC102704258                                      |
| TCONS_00018174 | 0.631546 | 0.842616    | 0.459941  | BGIOSGA027374 | XP_006654685.1 50S ribosomal protein L9                                                             |
| TCONS_00011068 | 0.631582 | 1.52681     | 2.096     | BGIOSGA013663 | XP_004981553.1.inosine-5'-monophosphate dehydrogenase                                               |
| TCONS_00032472 | 0.631783 | 0.43856     | 0.932174  | BGIOSGA000910 | XP_010234854.1.uncharacterized protein LOC100846112                                                 |
| TCONS_00029805 | 0.632003 | 0.00680603  | 0.604875  | BGIOSGA030014 | XP_015696500.1 probable protein phosphatase 2C 67                                                   |
| TCONS_00000409 | 0.632027 | -0.298713   | -0.952954 | BGIOSGA004165 | XP_006643898.2 phospho-N-acetylmuramoyl-pentapeptide-transferase homolog                            |
| TCONS_00013412 | 0.632306 | 0.291524    | 1.25796   | BGIOSGA024577 | XP_006650790.1 transcription elongation factor TFIIIS                                               |
| TCONS_00017330 | 0.632324 | -4.05397    | -0.484202 | BGIOSGA017468 | XP_006655095.1 TPR repeat-containing thioredoxin TTL1-like                                          |
| TCONS_00026841 | 0.632591 | 0.466877    | 1.43823   | BGIOSGA014919 | XP_004968247.1.histone H2B.3                                                                        |
| TCONS_00008613 | 0.632879 | 0.589493    | -0.124412 | BGIOSGA020778 | XP_008646075.1.uncharacterized protein LOC103627570                                                 |
| TCONS_00020090 | 0.632891 | 1.30452     | -0.139621 | BGIOSGA002221 | XP_006656617.1 acid phosphatase 1                                                                   |
| TCONS_00027799 | 0.63304  | 0.53009     | 1.3885    | BGIOSGA014479 | XP_024316228.1.pentatricopeptide repeat-containing protein At5g66520                                |
| TCONS_00034511 | 0.633054 | 0.899627    | 0.683817  | BGIOSGA032264 | XP_006662818.1 alcohol dehydrogenase 1                                                              |
| TCONS_00028472 | 0.633144 | -0.656621   | -0.255861 | BGIOSGA026484 | XP_021306676.1.photosystem I reaction center subunit II, chloroplastic-like                         |
| TCONS_00031640 | 0.633371 | 0.873357    | 1.27155   | BGIOSGA036580 | XP_006662075.1 calcineurin B-like protein 1                                                         |
| TCONS_00029538 | 0.633413 | 0.902473    | 0.817941  | BGIOSGA031296 | XP_015696519.1.PREDICTED: uncharacterized protein LOC107304926                                      |
| TCONS_00024386 | 0.633841 | 0.34229     | 0.710639  | BGIOSGA019942 | XP_015695229.1 transcription factor HBP-1b(c38)-like                                                |
| TCONS_00029091 | 0.633905 | 1.15051     | 0.0215536 | BGIOSGA029664 | XP_006665048.1 cytochrome P450 71A1-like                                                            |
| TCONS_00011669 | 0.63391  | -3.8667     | -2.46409  | BGIOSGA018039 | XP_006651096.1 4,5,9,10-diseco-3-hydroxy-5,9,17-trioxoandrosta-1(10),2-diene-4-olate hydrolase-like |
| TCONS_00000618 | 0.634116 | -3.86696    | 0.535402  | BGIOSGA025002 | XP_006644025.1 peroxidase 72-like                                                                   |
| TCONS_00025350 | 0.634811 | -0.254473   | -0.27994  | BGIOSGA004569 | NP_001158996.1SC3 protein                                                                           |
| TCONS_00002941 | 0.635091 | 0.591933    | 1.271     | BGIOSGA002283 | XP_006645555.2 acyl-protein thioesterase 2                                                          |
| TCONS_00007979 | 0.635232 | -0.476044   | -0.297441 | BGIOSGA000948 | XP_004969679.1F-box/kelch-repeat protein At1g23390                                                  |
| TCONS_00026806 | 0.635402 | -0.168135   | -0.145858 | BGIOSGA024867 | XP_002440130.1E3 ubiquitin-protein ligase ATL31                                                     |
| TCONS_00014686 | 0.635891 | 0.313014    | -0.49701  | BGIOSGA031777 | XP_006652596.1 poly(U)-specific endoribonuclease-B                                                  |
| TCONS_00011447 | 0.635987 | 1.34014     | 1.81617   | BGIOSGA011576 | XP_021303123.1.pentatricopeptide repeat-containing protein At3g53170 isoform X1                     |
| TCONS_00030288 | 0.636021 | 0.86232     | 0.376963  | BGIOSGA022307 | XP_015696398.1 protein lojap, chloroplastic                                                         |
| TCONS_00020196 | 0.636393 | 0.742803    | 1.68184   | BGIOSGA022387 | XP_006655831.1 mitochondrial outer membrane import complex protein METAXIN                          |
| TCONS_00030461 | 0.636696 | 2.23832     | 1.2839    | BGIOSGA018109 | XP_006660919.1.pentatricopeptide repeat-containing protein At1g20300, mitochondrial                 |
| TCONS_00008291 | 0.636756 | 1.05815     | 0.704786  | BGIOSGA006139 | XP_006647443.1.PREDICTED: uncharacterized protein LOC102713796                                      |
| TCONS_00029521 | 0.636961 | 0.851932    | 1.3663    | BGIOSGA009394 | XP_006661543.1 ruBisCO large subunit-binding protein subunit alpha-like                             |
| TCONS_00010421 | 0.636961 | 1.16864     | 1.0475    | BGIOSGA034282 | XP_004976818.1.multiple organellar RNA editing factor 3, mitochondrial                              |
| TCONS_00033264 | 0.637285 | 0.855089    | 0.449188  | BGIOSGA035087 | XP_006663350.1 ER membrane protein complex subunit 10                                               |
| TCONS_00026672 | 0.637492 | 0.45667     | -0.2731   | BGIOSGA006055 | XP_006659445.1 temperature-induced lipocalin-1                                                      |
| TCONS_00004466 | 0.637606 | 1.5642      | 0.482777  | BGIOSGA030854 | XP_015692505.1 E3 ubiquitin-protein ligase RNF5-like isoform X3                                     |
| TCONS_00005363 | 0.637619 | -0.326545   | -1.30584  | BGIOSGA007474 | XP_015688447.1 phosphopantetheine adenylyltransferase 2                                             |
| TCONS_00020249 | 0.637737 | -0.947308   | -0.104094 | BGIOSGA012652 | XP_006656719.1 putative glutathione peroxidase 7, chloroplastic                                     |
| TCONS_00029751 | 0.637799 | 0.756929    | 1.32191   | BGIOSGA029567 | XP_006660500.1 sodium/hydrogen exchanger 6-like                                                     |
| TCONS_00023645 | 0.638046 | 1.25444     | 0.75725   | BGIOSGA025667 | XP_015694629.1 serine/threonine-protein kinase/endoribonuclease IRE1b                               |
| TCONS_00022769 | 0.638234 | 0.0906711   | 0.440238  | BGIOSGA007114 | XP_015694230.1 putative serine/threonine-protein kinase                                             |
| TCONS_00004892 | 0.638251 | 0.612493    | -0.727248 | BGIOSGA011725 | XP_006645166.1 cyclin-dependent kinase B1-1                                                         |
| TCONS_00018769 | 0.638342 | 0.061622    | 1.18418   | BGIOSGA019430 | XP_021317282.1.uncharacterized protein LOC8074381 isoform X2                                        |
| TCONS_00026430 | 0.638395 | -0.649663   | 0.303349  | BGIOSGA025924 | XP_006659340.1 mitochondrial pyruvate carrier 4-like                                                |
| TCONS_00011139 | 0.638563 | 0.69254     | 1.12653   | BGIOSGA017652 | XP_006650739.1 protein RTE1-HOMOLOG                                                                 |
| TCONS_00013511 | 0.638824 | 0.993191    | 0.252123  | BGIOSGA009468 | XP_006652010.2 polycopene isomerase 1, chloroplastic                                                |
| TCONS_00011858 | 0.639179 | -0.299399   | 0.113597  | BGIOSGA011150 | XP_006649703.1 65-kDa microtubule-associated protein 7-like                                         |
| TCONS_00025129 | 0.639229 | 0.888371    | 0.598124  | BGIOSGA024274 | XP_006658574.1 ATP synthase subunit delta', mitochondrial                                           |
| TCONS_00033816 | 0.639479 | -0.241958   | -0.11293  | BGIOSGA002669 | XP_006663036.1 thioredoxin domain-containing protein PLP3A-like                                     |
| TCONS_00011183 | 0.639534 | 0.236283    | -0.874439 | BGIOSGA024058 | XP_003564066.1.chaperonin-like RbcX protein 2, chloroplastic                                        |
| TCONS_00021313 | 0.639704 | 0.051024    | -0.200819 | BGIOSGA032300 | XP_004966130.1.exocyst complex component EXO70A1                                                    |
| TCONS_00021444 | 0.639758 | 1.27803     | 0.736777  | BGIOSGA017454 | NP_001150057.1IQ calmodulin-binding motif family protein                                            |

transcriptome

|                |          |            |            |               |                                                                                                     |
|----------------|----------|------------|------------|---------------|-----------------------------------------------------------------------------------------------------|
| TCONS_00000949 | 0.639766 | 1.0122     | 0.227673   | BGIOSGA032183 | XP_006644177.2 probable E3 ubiquitin-protein ligase LUL2                                            |
| TCONS_00029179 | 0.639923 | 1.29779    | 1.65193    | BGIOSGA004260 | XP_015696383.1 WAS/WASL-interacting protein family member 3-like                                    |
| TCONS_00008556 | 0.639965 | 3.28212    | 0.392823   | BGIOSGA002547 | XP_015689539.1 dehydrin COR410                                                                      |
| TCONS_00029903 | 0.640145 | 1.80261    | 1.3392     | #N/A          | #N/A                                                                                                |
| TCONS_00025715 | 0.640481 | 0.635805   | 0.528578   | BGIOSGA025331 | XP_004958712.1 protein ENHANCED DISEASE RESISTANCE 4                                                |
| TCONS_00016310 | 0.640482 | -0.013361  | -0.0447462 | BGIOSGA005957 | XP_006652568.1 remorin-like                                                                         |
| TCONS_00010458 | 0.64067  | -2.61798   | -0.338163  | BGIOSGA026003 | XP_006664981.1 chlorophyll a-b binding protein, chloroplastic                                       |
| TCONS_00019075 | 0.640877 | 2.38679    | 0.696869   | BGIOSGA018283 | XP_015693176.1 chaperone protein DnaJ-like                                                          |
| TCONS_00024592 | 0.641222 | 0.532822   | 1.04373    | #N/A          | #N/A                                                                                                |
| TCONS_00002190 | 0.641295 | 1.11006    | 1.94131    | BGIOSGA004825 | XP_015690412.1 cell division control protein 6 homolog                                              |
| TCONS_00026999 | 0.641322 | 0.22391    | 0.756199   | BGIOSGA029050 | NP_001168939.1 uncharacterized LOC100382753                                                         |
| TCONS_00003694 | 0.64159  | 0.375489   | 1.10642    | BGIOSGA022886 | XP_008648688.1 uncharacterized LOC100193223 isoform X1                                              |
| TCONS_00015678 | 0.641616 | 1.31875    | 1.2327     | BGIOSGA015301 | XP_006653289.2 U11/U12 small nuclear ribonucleoprotein 48 kDa protein                               |
| TCONS_00011663 | 0.64167  | 0.179718   | -0.66579   | BGIOSGA011346 | XP_006651093.1 PREDICTED: uncharacterized protein LOC102702547                                      |
| TCONS_00017038 | 0.642196 | -1.24367   | -1.2398    | BGIOSGA017726 | XP_006654944.1 probable glucuronosyltransferase Os05g0123100                                        |
| TCONS_00031511 | 0.642236 | 2.2412     | -0.188196  | BGIOSGA020018 | XP_002445769.1 probable glutathione S-transferase GSTU6                                             |
| TCONS_00027040 | 0.642439 | 0.845591   | 0.493024   | BGIOSGA029089 | XP_002445769.1 peptidyl-prolyl cis-trans isomerase FKBP16-3, chloroplastic                          |
| TCONS_00029124 | 0.642769 | -0.54003   | 0.150074   | BGIOSGA002010 | XP_015694263.1 PREDICTED: uncharacterized protein LOC107304498                                      |
| TCONS_00000673 | 0.642796 | 1.28874    | 0.964695   | BGIOSGA003261 | XP_006644063.2 COP9 signalosome complex subunit 2                                                   |
| TCONS_00005281 | 0.642956 | 0.613097   | -0.43366   | BGIOSGA037813 | XP_015688795.1 peptidyl-prolyl cis-trans isomerase FKBP18, chloroplastic                            |
| TCONS_00032160 | 0.643073 | 0.840307   | 1.94437    | BGIOSGA031980 | XP_006661750.1 delta(24)-sterol reductase                                                           |
| TCONS_00037565 | 0.64325  | -1.23083   | -2.73054   | BGIOSGA006987 | XP_002442578.1 phytoene synthase 2, chloroplastic                                                   |
| TCONS_00003194 | 0.643301 | 0.502888   | 0.32371    | BGIOSGA012487 | XP_003565568.1 transcription factor bHLH150                                                         |
| TCONS_00022039 | 0.643344 | -0.0886788 | 0.331286   | BGIOSGA014531 | XP_003563969.1 aluminum-activated malate transporter 9                                              |
| TCONS_00008267 | 0.643512 | -1.69681   | 1.20411    | BGIOSGA016565 | XP_003575244.1 heavy metal-associated isoprenylated plant protein 47                                |
| TCONS_00023547 | 0.643526 | -0.0299502 | 0.454959   | BGIOSGA025579 | XP_006658498.1 alpha-glucosidase 2-like                                                             |
| TCONS_00034738 | 0.643599 | -0.0321532 | 0.52345    | BGIOSGA002464 | XP_004979211.1 protein CASPARIAN STRIP INTEGRITY FACTOR 2                                           |
| TCONS_00006831 | 0.643843 | 0.289838   | 0.766382   | BGIOSGA009005 | XP_006649024.1 ankyrin repeat-containing protein At2g01680                                          |
| TCONS_00008637 | 0.644419 | 1.07652    | 0.574309   | BGIOSGA014425 | XP_006647738.1 PREDICTED: uncharacterized protein LOC102704308                                      |
| TCONS_00009940 | 0.645166 | 1.16428    | 1.34234    | BGIOSGA012491 | XP_006649978.1 probable NADH dehydrogenase [ubiquinone] 1 alpha subcomplex subunit 5, mitochondrial |
| TCONS_00028405 | 0.645833 | 0.728098   | 0.46275    | BGIOSGA037845 | XP_004974072.1 methionine aminopeptidase 2B                                                         |
| TCONS_00007926 | 0.646176 | 0.845707   | 0.894621   | BGIOSGA012223 | XP_006647231.1 probable 4-hydroxy-tetrahydrodipicolinate reductase 1, chloroplastic                 |
| TCONS_00003505 | 0.64623  | 0.546829   | 0.99872    | BGIOSGA005347 | XP_006644155.1 serine/threonine-protein phosphatase PP1-like                                        |
| TCONS_00032653 | 0.646313 | 1.66765    | 0.821506   | BGIOSGA031456 | XP_006662031.1 UDP-N-acetylmuramoyl-L-alanyl-D-glutamate--2,6-diaminopimelate ligase                |
| TCONS_00028968 | 0.646375 | -1.14109   | 1.07375    | BGIOSGA021880 | XP_006660609.2 probable cinnamyl alcohol dehydrogenase 8C                                           |
| TCONS_00022918 | 0.64652  | 1.80139    | 2.16369    | BGIOSGA020523 | XP_006656497.1 RNA pseudouridine synthase 2, chloroplastic                                          |
| TCONS_00017065 | 0.646577 | 0.863017   | 1.39166    | BGIOSGA019115 | XP_006654954.1 acetylornithine aminotransferase, mitochondrial                                      |
| TCONS_00008635 | 0.646704 | 2.72098    | 1.80066    | BGIOSGA014376 | XP_006648958.1 PREDICTED: uncharacterized protein LOC102701336                                      |
| TCONS_00012559 | 0.646792 | 1.00006    | 1.54392    | BGIOSGA030640 | XP_004982548.1 transcription factor SOX-4                                                           |
| TCONS_00029346 | 0.64725  | -1.44079   | -0.477376  | BGIOSGA005257 | XP_004957365.1 formin-like protein 15                                                               |
| TCONS_00002505 | 0.647431 | -0.130999  | 1.08754    | BGIOSGA018592 | XP_004951877.1 endoglucanase 5                                                                      |
| TCONS_00016213 | 0.647493 | -0.130753  | -0.733231  | BGIOSGA006036 | XP_015692137.1 PREDICTED: uncharacterized protein LOC102722484 isoform X3                           |
| TCONS_00001778 | 0.647545 | 0.678105   | -0.0701781 | BGIOSGA004416 | XP_006644672.1 polynucleotide 3'-phosphatase ZDP                                                    |
| TCONS_00028580 | 0.64767  | -0.377044  | 0.604995   | BGIOSGA025150 | XP_006661040.2 N-acetyl-D-glucosamine kinase-like                                                   |
| TCONS_00013246 | 0.647762 | 0.564374   | 0.0902209  | BGIOSGA020068 | XP_003558723.1 uncharacterized protein LOC100826176                                                 |
| TCONS_00009202 | 0.64797  | 1.09261    | 1.26319    | BGIOSGA011730 | XP_006649284.2 hydroxymethylglutaryl-CoA synthase-like                                              |
| TCONS_00035015 | 0.648458 | 0.443483   | 0.519866   | BGIOSGA010066 | XP_002453153.2 probable nucleolar protein 5-2                                                       |
| TCONS_00026370 | 0.648836 | 0.645569   | 0.658549   | BGIOSGA028440 | XP_006659295.1 tyrosine--tRNA ligase 1, cytoplasmic-like                                            |
| TCONS_00016119 | 0.649344 | 0.362864   | -0.310466  | BGIOSGA033452 | XP_015691503.1 peptide methionine sulfoxide reductase A2-1                                          |
| TCONS_00024312 | 0.649582 | 0.972748   | 1.01594    | BGIOSGA026355 | XP_006658090.1 probable GTP-binding protein OBGC1, chloroplastic                                    |
| TCONS_00000360 | 0.649688 | 1.87335    | 1.30786    | BGIOSGA002937 | XP_006643869.1 protein ALWAYS EARLY 3-like isoform X1                                               |
| TCONS_00010262 | 0.649841 | 0.454136   | -0.582327  | BGIOSGA021732 | XP_006651481.1 3-oxoacyl-[acyl-carrier-protein] synthase II, chloroplastic-like                     |
| TCONS_00034191 | 0.650023 | 1.34061    | -0.464095  | BGIOSGA034031 | XP_002441776.1 uncharacterized protein LOC8074828                                                   |

## transcriptome

|                |          |            |             |               |                                                                                      |
|----------------|----------|------------|-------------|---------------|--------------------------------------------------------------------------------------|
| TCONS_00022372 | 0.650198 | -2.5155    | -0.368799   | BGIOSGA021180 | XP_015693604.1 PREDICTED: uncharacterized protein LOC102704713                       |
| TCONS_00004585 | 0.650469 | -0.146339  | 0.607863    | BGIOSGA000628 | XP_004970298.1 F-box protein At2g41170 isoform X2                                    |
| TCONS_00005491 | 0.65073  | 0.610454   | 0.689539    | BGIOSGA004048 | XP_006646920.1 putative serine/threonine-protein kinase isoform X1                   |
| TCONS_00002272 | 0.651011 | 1.14644    | 1.26142     | BGIOSGA018018 | XP_006645104.1 splicing regulator RBM11-like isoform X1                              |
| TCONS_00020362 | 0.65103  | 0.756376   | 0.693189    | BGIOSGA012011 | XP_003564084.1 GLABRA2 expression modulator                                          |
| TCONS_00020920 | 0.651647 | 0.687848   | 0.932034    | BGIOSGA023125 | XP_006656183.1 (S)-coclaurine N-methyltransferase-like                               |
| TCONS_00008980 | 0.65168  | 0.856175   | 1.33489     | BGIOSGA037481 | XP_022681499.1 F-box/LRR-repeat protein 14                                           |
| TCONS_00006803 | 0.651869 | -0.27571   | -0.00404317 | BGIOSGA021102 | XP_006649012.1 E3 ubiquitin-protein ligase ATL41-like                                |
| TCONS_00013360 | 0.651887 | 1.24674    | 1.96072     | BGIOSGA022177 | XP_006651920.1 DEAD-box ATP-dependent RNA helicase 27                                |
| TCONS_00023977 | 0.652149 | 0.334619   | -0.208691   | BGIOSGA026008 | XP_006658734.1 5-formyltetrahydrofolate cyclo-ligase, mitochondrial                  |
| TCONS_00011084 | 0.652215 | 1.02969    | 1.17486     | BGIOSGA025164 | XP_006650694.1 peroxisomal membrane protein 13-like                                  |
| TCONS_00000135 | 0.652233 | 0.300211   | 0.7951      | BGIOSGA002709 | XP_006643692.1 probable signal peptidase complex subunit 3                           |
| TCONS_00016534 | 0.652609 | 0.839492   | 0.909905    | BGIOSGA014086 | XP_015692191.1 HBS1-like protein isoform X5                                          |
| TCONS_00004801 | 0.653008 | 0.441249   | 0.748308    | BGIOSGA000416 | XP_020394452.1 uncharacterized protein LOC100274722 isoform X2                       |
| TCONS_00000132 | 0.653054 | 1.02153    | 0.880479    | BGIOSGA002706 | XP_015690200.1 PREDICTED: uncharacterized protein LOC102705209                       |
| TCONS_00029564 | 0.653122 | 1.56107    | 0.838379    | BGIOSGA030257 | XP_004974953.1 serine/arginine repetitive matrix protein 1 isoform X3                |
| TCONS_00000513 | 0.653137 | -0.847129  | -1.4825     | BGIOSGA003087 | XP_015688095.1 PREDICTED: uncharacterized protein LOC102704381                       |
| TCONS_00029631 | 0.653709 | 0.679701   | 1.03335     | BGIOSGA030190 | XP_006660432.1 tropinone reductase-like 3                                            |
| TCONS_00036172 | 0.653755 | 1.54857    | 1.00972     | BGIOSGA009496 | XP_015698396.1 acyl-CoA-binding domain-containing protein 4-like                     |
| TCONS_00030388 | 0.653892 | -2.91016   | -2.0929     | BGIOSGA020673 | XP_003578469.1 BAG family molecular chaperone regulator 1                            |
| TCONS_00009636 | 0.653933 | 1.38725    | 1.26168     | BGIOSGA004399 | XP_006649684.2 GTP-binding protein At2g22870-like                                    |
| TCONS_00031365 | 0.654074 | -0.176384  | 0.525616    | BGIOSGA033179 | XP_004982768.1 reactive oxygen species modulator 1                                   |
| TCONS_00000642 | 0.65414  | 1.01152    | 0.414489    | BGIOSGA003223 | XP_006645750.1 rhomboid-like protein 20                                              |
| TCONS_00019736 | 0.654174 | 1.22353    | 0.979059    | BGIOSGA023551 | XP_006655551.1 putative clathrin assembly protein At2g01600                          |
| TCONS_00002531 | 0.654587 | -3.91104   | -0.509662   | BGIOSGA018146 | XP_015692392.1 probable ADP-ribosylation factor GTPase-activating protein AGD11      |
| TCONS_00005440 | 0.65481  | 0.359345   | 1.09753     | BGIOSGA037224 | XP_006648308.1 apoptosis-inducing factor 2-like                                      |
| TCONS_00030178 | 0.655294 | 0.373461   | -0.672003   | BGIOSGA029624 | XP_006660713.1 beta carbonic anhydrase 5, chloroplastic-like isoform X2              |
| TCONS_00009411 | 0.655524 | 1.46861    | 1.22498     | BGIOSGA013646 | XP_006649485.1 tRNA-specific 2-thiouridylase MnmA                                    |
| TCONS_00030924 | 0.655898 | 0.94847    | 0.177931    | BGIOSGA027383 | XP_006662277.1 PREDICTED: uncharacterized protein LOC102706505                       |
| TCONS_00008204 | 0.656216 | -0.107143  | 0.717179    | BGIOSGA015009 | XP_015688639.1 probable signal peptidase complex subunit 2                           |
| TCONS_00017420 | 0.656232 | -0.39781   | 0.817564    | BGIOSGA014849 | XP_006663036.1 thioredoxin domain-containing protein PLP3A-like                      |
| TCONS_00022135 | 0.656795 | 1.42009    | 1.56525     | BGIOSGA008941 | XP_006648996.2 PHD finger protein At3g20280-like                                     |
| TCONS_00032855 | 0.657141 | 0.396676   | 0.524315    | BGIOSGA036731 | XP_006663736.1 stress response protein nst1-like                                     |
| TCONS_00017821 | 0.657571 | 1.14198    | 2.25327     | BGIOSGA019881 | XP_006654411.1 RPA-interacting protein A                                             |
| TCONS_00005783 | 0.657718 | 0.151459   | 0.012338    | BGIOSGA007896 | XP_006647122.1 probable inactive dual specificity protein phosphatase-like At4g18593 |
| TCONS_00014665 | 0.657766 | 0.679491   | -0.063557   | BGIOSGA016829 | XP_006652577.1 peroxisomal membrane protein 11-4                                     |
| TCONS_00028519 | 0.657873 | -1.78821   | -0.387967   | BGIOSGA017934 | XP_015698949.1 golgin-84                                                             |
| TCONS_00021383 | 0.658096 | 0.212875   | -0.927218   | BGIOSGA023615 | XP_006656498.1 PREDICTED: uncharacterized protein LOC102722776                       |
| TCONS_00028316 | 0.658205 | 0.313786   | 0.448236    | BGIOSGA026134 | XP_006659606.1 oligouridylate-binding protein 1B-like                                |
| TCONS_00011822 | 0.658364 | -0.0123423 | -1.29252    | #N/A          | #N/A                                                                                 |
| TCONS_00022961 | 0.658419 | 0.933085   | 0.737202    | BGIOSGA024996 | XP_015695422.1 methylsterol monooxygenase 2-1-like                                   |
| TCONS_00005169 | 0.658744 | 1.53407    | 0.393104    | BGIOSGA000034 | XP_006645336.1 PREDICTED: uncharacterized protein LOC102710745                       |
| TCONS_00021251 | 0.658872 | -3.7498    | -0.925872   | BGIOSGA019132 | XP_006656386.1 peroxidase 3-like                                                     |
| TCONS_00022585 | 0.659718 | 0.243071   | 0.617382    | BGIOSGA027541 | XP_015693736.1 cinnamoyl-CoA reductase 1-like                                        |
| TCONS_00033036 | 0.660219 | -2.71488   | #NA         | BGIOSGA034865 | XP_006663240.2 horcolin-like                                                         |
| TCONS_00033314 | 0.661131 | 2.24205    | 1.95284     | BGIOSGA029336 | XP_006663367.1 gem-associated protein 2-like                                         |
| TCONS_00011490 | 0.661214 | 0.558581   | 0.909721    | BGIOSGA021782 | XP_006649317.1 callose synthase 3-like isoform X1                                    |
| TCONS_00006739 | 0.661286 | 4.63262    | 1.948       | BGIOSGA007446 | XP_006647786.1 17.8 kDa heat shock protein-like                                      |
| TCONS_00018741 | 0.661306 | -0.219894  | 1.23836     | BGIOSGA005924 | XP_006654120.1 probable WRKY transcription factor 51                                 |
| TCONS_00015191 | 0.661327 | 0.192527   | -0.440794   | BGIOSGA014518 | XP_006653042.2 phosphomannomutase                                                    |
| TCONS_00017919 | 0.66147  | 0.700917   | -0.506725   | BGIOSGA008965 | XP_010231313.20-fucosyltransferase 19                                                |
| TCONS_00011461 | 0.6615   | 0.125682   | 0.124179    | BGIOSGA017683 | XP_015690329.1 ALA-interacting subunit 5-like                                        |
| TCONS_00017825 | 0.661543 | 0.914716   | 0.159905    | BGIOSGA024491 | XP_006654244.1 guanosine nucleotide diphosphate dissociation inhibitor 2-like        |
| TCONS_00025469 | 0.661719 | 1.06498    | 1.65499     | BGIOSGA023961 | XP_006658770.1 pentatricopeptide repeat-containing protein At4g21705, mitochondrial  |

## transcriptome

|                |          |             |           |               |                                                                                                                         |
|----------------|----------|-------------|-----------|---------------|-------------------------------------------------------------------------------------------------------------------------|
| TCONS_00016844 | 0.661802 | 1.16193     | 0.580156  | BGIOSGA033685 | XP_006653863.1 protein DJ-1 homolog D                                                                                   |
| TCONS_00004292 | 0.661926 | 1.00359     | 0.553815  | BGIOSGA031498 | XP_006644618.1PREDICTED: uncharacterized protein LOC102712307                                                           |
| TCONS_00012102 | 0.661954 | 2.13508     | 1.99145   | BGIOSGA001357 | XP_015690372.1 programmed cell death protein 2                                                                          |
| TCONS_00011330 | 0.662086 | 0.300881    | 0.915266  | BGIOSGA013940 | XP_010927687.1 actin-related protein 2/3 complex subunit 4 isoform X2                                                   |
| TCONS_00004950 | 0.662386 | -1.13243    | -0.187251 | BGIOSGA020241 | NP_001143833.1uncharacterized LOC100276614 precursor                                                                    |
| TCONS_00019259 | 0.662572 | -0.113133   | -0.490205 | BGIOSGA022538 | XP_015692811.1PREDICTED: uncharacterized protein LOC102721274                                                           |
| TCONS_00018139 | 0.662779 | -0.195826   | 0.465373  | BGIOSGA009865 | NP_001338701.1uncharacterized LOC100856921 precursor                                                                    |
| TCONS_00022173 | 0.662819 | 0.0925672   | 0.758439  | BGIOSGA022713 | XP_024318165.1disease resistance protein RPM1                                                                           |
| TCONS_00032034 | 0.662906 | 0.528158    | -1.18083  | BGIOSGA010400 | XP_004983271.1protein DETOXIFICATION 16                                                                                 |
| TCONS_00006609 | 0.663125 | -0.493178   | 0.210944  | BGIOSGA023963 | XP_006647657.1 purine-uracil permease NCS1                                                                              |
| TCONS_00000963 | 0.663201 | 0.34462     | -0.107096 | BGIOSGA003566 | XP_003565905.1F-box protein At5g49610                                                                                   |
| TCONS_00018639 | 0.663256 | 0.265695    | 1.60449   | BGIOSGA000104 | XP_006654997.2 proline synthase co-transcribed bacterial homolog protein                                                |
| TCONS_00002972 | 0.663321 | 0.659519    | 1.20385   | BGIOSGA023854 | XP_006643835.1 TSL-kinase interacting protein 1                                                                         |
| TCONS_00028778 | 0.663362 | -0.535673   | -1.00771  | BGIOSGA007228 | XP_006660541.1 bifunctional protein FolD 1, mitochondrial-like                                                          |
| TCONS_00012833 | 0.663477 | 0.819926    | 0.331989  | BGIOSGA010137 | XP_006650357.1 rhomboid-like protein 15                                                                                 |
| TCONS_00012511 | 0.663727 | 0.663634    | -0.335153 | BGIOSGA026082 | XP_006665039.2 3-oxo-Delta(4,5)-steroid 5-beta-reductase                                                                |
| TCONS_00010486 | 0.663824 | 1.01398     | 0.515393  | BGIOSGA030618 | XP_006650281.1 presenilin-like protein At2g29900                                                                        |
| TCONS_00010722 | 0.663984 | 1.33727     | 0.721788  | BGIOSGA013346 | XP_006651698.1 ferredoxin-2                                                                                             |
| TCONS_00005963 | 0.664084 | 0.795493    | 0.423544  | BGIOSGA008099 | XP_004952262.1uncharacterized protein LOC101782043                                                                      |
| TCONS_00033460 | 0.664113 | -0.310923   | 0.440126  | BGIOSGA035093 | XP_015697758.1 TBC1 domain family member 13-like                                                                        |
| TCONS_00024278 | 0.664139 | 0.965344    | 1.1236    | BGIOSGA020992 | XP_006658924.1 ubiquitin carboxyl-terminal hydrolase 24                                                                 |
| TCONS_00027349 | 0.664522 | 0.128596    | 0.33717   | BGIOSGA027653 | XP_006659115.2PREDICTED: uncharacterized protein LOC102711087                                                           |
| TCONS_00007451 | 0.664614 | 0.570944    | 0.577797  | BGIOSGA035648 | XP_006646960.1 probable small nuclear ribonucleoprotein F                                                               |
| TCONS_00015238 | 0.664964 | -0.372226   | 0.552792  | BGIOSGA015741 | XP_006652065.1PREDICTED: uncharacterized protein LOC102708426                                                           |
| TCONS_00026411 | 0.665062 | 1.32382     | 1.30571   | BGIOSGA000017 | XP_015694050.1 putative acyl-activating enzyme 19 isoform X1                                                            |
| TCONS_00012956 | 0.665176 | 2.14183     | 1.10791   | BGIOSGA010033 | XP_015690020.1PREDICTED: uncharacterized protein C6C3.02c                                                               |
| TCONS_00005671 | 0.665209 | 0.518414    | 0.226248  | BGIOSGA023376 | XP_003571680.1protein CLP1 homolog XP_017970016.1 DNA-directed RNA polymerases I, II, and III subunit RPABC5 isoform X1 |
| TCONS_00035678 | 0.6653   | 1.18598     | 0.859824  | BGIOSGA010355 | XP_006644755.1 chorismate mutase 3, chloroplastic-like                                                                  |
| TCONS_00004456 | 0.665449 | -0.712281   | -1.20223  | BGIOSGA000765 | XP_006664715.1 auxin-responsive protein IAA31-like                                                                      |
| TCONS_00036375 | 0.665497 | #NA         | 1.14884   | BGIOSGA019301 | XP_006654280.1 transcription initiation factor TFIID subunit 7-like                                                     |
| TCONS_00019116 | 0.66578  | 0.538359    | 0.815802  | BGIOSGA004105 | XP_004956706.1uncharacterized protein LOC101767387                                                                      |
| TCONS_00028906 | 0.665853 | -0.121018   | -0.475936 | BGIOSGA036200 | XP_006654839.1 anaphase-promoting complex subunit 10 isoform X1                                                         |
| TCONS_00018377 | 0.665872 | 1.4483      | -2.31154  | BGIOSGA020429 | XP_015691567.1PREDICTED: uncharacterized protein LOC102716404, partial                                                  |
| TCONS_00016577 | 0.665977 | 0.962783    | 0.181411  | BGIOSGA028231 | XP_004973121.1uncharacterized protein LOC101762210                                                                      |
| TCONS_00026249 | 0.666356 | 1.58523     | 0.759574  | BGIOSGA028333 | XP_006650574.1 pentatricopeptide repeat-containing protein At3g22670, mitochondrial-like                                |
| TCONS_00010944 | 0.666467 | 0.252714    | 0.797274  | BGIOSGA013547 | XP_006659097.1 zinc finger CCHC domain-containing protein 55-like                                                       |
| TCONS_00025880 | 0.667453 | -0.00223817 | 0.391521  | BGIOSGA027950 | XP_006662852.1 PHD finger protein ALFIN-LIKE 8                                                                          |
| TCONS_00034601 | 0.667558 | 0.344102    | 0.571979  | BGIOSGA015015 | XP_003569261.1protein ANTAGONIST OF LIKE HETEROCHROMATIN PROTEIN 1                                                      |
| TCONS_00001212 | 0.667664 | 1.73557     | 1.38439   | BGIOSGA003836 | XP_003568784.1auxin-responsive protein IAA16 isoform X1                                                                 |
| TCONS_00017257 | 0.667923 | 0.413311    | 1.0618    | BGIOSGA010196 | XP_006660873.2 probable 6-phosphogluconolactonase 4, chloroplastic                                                      |
| TCONS_00030406 | 0.668048 | -0.396813   | -0.23271  | BGIOSGA021278 | XP_010228985.2plant intracellular Ras-group-related LRR protein 7                                                       |
| TCONS_00009553 | 0.668231 | 0.275419    | 1.14195   | BGIOSGA022721 | XP_015691560.1 protein NRT1/ PTR FAMILY 8.2-like                                                                        |
| TCONS_00040304 | 0.66829  | -0.724656   | 0.267335  | BGIOSGA038011 | XP_003580576.1RPM1-interacting protein 4                                                                                |
| TCONS_00016636 | 0.668766 | -1.3595     | 0.956314  | BGIOSGA014327 | XP_003572753.1senescence-associated protein OSA15, chloroplastic isoform X2                                             |
| TCONS_00017129 | 0.66897  | -1.99454    | -1.07986  | BGIOSGA019176 | XP_015697072.1 3-hydroxyisobutyryl-CoA hydrolase-like protein 2, mitochondrial                                          |
| TCONS_00032671 | 0.669042 | 1.13521     | 0.576676  | BGIOSGA018909 | XP_002442297.1nucleoside diphosphate kinase 2, chloroplastic                                                            |
| TCONS_00036191 | 0.669101 | 0.349063    | 1.72507   | BGIOSGA037545 | XP_015693954.1 probable acyl-[acyl-carrier-protein]-UDP-N-acetylglucosamine O-acyltransferase, mitochondrial isoform X1 |
| TCONS_00001728 | 0.669102 | 1.18121     | 0.680339  | BGIOSGA014237 | NP_001152287.1TMV response-related protein                                                                              |
| TCONS_00021953 | 0.669102 | 1.44424     | 1.96574   | BGIOSGA030119 | XP_006650269.1PREDICTED: uncharacterized protein LOC102719001 isoform X1                                                |
| TCONS_00012600 | 0.669498 | -0.181507   | -0.27569  | BGIOSGA010377 | XP_006648924.1 HMG1/2-like protein                                                                                      |
| TCONS_00006617 | 0.669498 | 0.0462885   | -0.885741 | BGIOSGA027819 |                                                                                                                         |

## transcriptome

|                |          |           |             |               |                                                                                                |
|----------------|----------|-----------|-------------|---------------|------------------------------------------------------------------------------------------------|
| TCONS_00015580 | 0.669642 | 0.766512  | -0.342353   | BGIOSGA028343 | XP_004975238.1beta-glucuronosyltransferase GicAT14A                                            |
| TCONS_00026198 | 0.669661 | 1.52154   | 0.263905    | BGIOSGA028270 | XP_006659238.2 4'-phosphopantetheinyl transferase HetI-like                                    |
| TCONS_00017075 | 0.66979  | 1.79701   | 0.678621    | BGIOSGA019127 | XP_006654009.1 DNA (cytosine-5)-methyltransferase DRM1-like                                    |
| TCONS_00024033 | 0.669997 | 1.26742   | 1.47189     | BGIOSGA026072 | XP_006658766.1 probable mitochondrial saccharopine dehydrogenase-like oxidoreductase At5g39410 |
| TCONS_00002399 | 0.670706 | 1.1496    | 1.25039     | BGIOSGA005035 | XP_006646601.1 pentatricopeptide repeat-containing protein At1g05600-like                      |
| TCONS_00018485 | 0.670728 | 0.545278  | 0.791758    | BGIOSGA000017 | XP_015692897.1 probable kinetochore protein SPC25                                              |
| TCONS_00032981 | 0.671158 | -0.520013 | 0.0317316   | BGIOSGA024436 | XP_003578894.1rho GTPase-activating protein 5                                                  |
| TCONS_00006727 | 0.671246 | 0.375879  | 0.488999    | BGIOSGA008898 | XP_006647777.1 histone-lysine N-methyltransferase SUVR5 isoform X1                             |
| TCONS_00022623 | 0.671393 | 0.330313  | 0.674623    | BGIOSGA030830 | XP_004965791.1transcription factor MYB44                                                       |
| TCONS_00001452 | 0.671782 | -0.407143 | -0.00441592 | BGIOSGA017500 | XP_021313274.1probable isoprenylcysteine alpha-carbonyl methyltransferase ICME2 isoform X2     |
| TCONS_00008099 | 0.672061 | -1.85965  | -0.0388271  | #N/A          | #N/A                                                                                           |
| TCONS_00017628 | 0.67215  | 0.270465  | -0.742295   | BGIOSGA019690 | XP_004962336.1uncharacterized protein LOC101777552                                             |
| TCONS_00018512 | 0.672294 | 1.14442   | -0.271752   | #N/A          | #N/A                                                                                           |
| TCONS_00033033 | 0.672438 | 2.35756   | -3.32797    | BGIOSGA037048 | XP_004977309.1uncharacterized protein LOC101776555                                             |
| TCONS_00001479 | 0.672477 | -0.560022 | 1.19549     | BGIOSGA004119 | XP_022682886.1putative pentatricopeptide repeat-containing protein At5g52630                   |
| TCONS_00018543 | 0.672663 | 1.1278    | -1.0066     | BGIOSGA014464 | XP_002440516.1probable 2-oxoglutarate-dependent dioxygenase At3g111800 isoform X1              |
| TCONS_00001521 | 0.672698 | -0.184149 | 0.00414672  | BGIOSGA017542 | XP_004961181.150S ribosomal protein L12, chloroplastic                                         |
| TCONS_00021397 | 0.67297  | 0.0284237 | 0.877158    | BGIOSGA022683 | XP_021304905.1protein FREE1 isoform X2                                                         |
| TCONS_00006870 | 0.673002 | 0.339781  | 0.518625    | BGIOSGA009048 | XP_010236118.2uncharacterized protein LOC100822345 isoform X1                                  |
| TCONS_00019667 | 0.673186 | 0.77613   | 0.395494    | BGIOSGA004405 | XP_006654684.1 50S ribosomal protein L20-like                                                  |
| TCONS_00034066 | 0.673502 | -2.05317  | -1.15004    | BGIOSGA037610 | XP_006663116.1 ATP-citrate synthase alpha chain protein 2                                      |
| TCONS_00021885 | 0.673736 | -0.804016 | -1.55124    | BGIOSGA030618 | XP_002438085.1proline-rich receptor-like protein kinase PERK13                                 |
| TCONS_00001794 | 0.67378  | -0.924233 | 0.36914     | BGIOSGA028042 | XP_010232287.1uncharacterized protein LOC100822437                                             |
| TCONS_00012431 | 0.673803 | 1.96882   | 1.22323     | BGIOSGA008904 | XP_015690190.1 serine/threonine-protein kinase At5g01020-like                                  |
| TCONS_00003800 | 0.673886 | 0.649982  | 0.770152    | BGIOSGA004299 | XP_006644264.1 vesicle transport v-SNARE 13-like                                               |
| TCONS_00005812 | 0.673912 | 1.45807   | 1.31223     | BGIOSGA033972 | XP_006648526.1 chloroplast processing peptidase                                                |
| TCONS_00034423 | 0.67407  | -1.04418  | 0.255268    | BGIOSGA015169 | XP_008673747.1putrescine hydroxycinnamoyltransferase 1                                         |
| TCONS_00010108 | 0.674548 | 0.43227   | 0.359906    | BGIOSGA019850 | XP_006650103.1 peptide methionine sulfoxide reductase B5                                       |
| TCONS_00005916 | 0.674613 | 1.97207   | 0.971826    | BGIOSGA033864 | XP_006664945.1 apoptosis inhibitor 5                                                           |
| TCONS_00020592 | 0.67473  | -0.843719 | -0.0258016  | BGIOSGA022777 | XP_006656079.1 E3 ubiquitin-protein ligase SINA-like 7                                         |
| TCONS_00000474 | 0.674789 | -0.100586 | -2.01186    | BGIOSGA021834 | XP_002457087.2cytochrome P450 71A1                                                             |
| TCONS_00009885 | 0.675382 | 1.96684   | 0.539214    | BGIOSGA023673 | XP_015689862.1 COBRA-like protein 7                                                            |
| TCONS_00032485 | 0.675413 | -1.45053  | -0.472953   | BGIOSGA031634 | XP_006662467.1 protein TIC110, chloroplastic                                                   |
| TCONS_00025138 | 0.675415 | 2.02806   | 1.41357     | BGIOSGA024268 | XP_006657729.1 large proline-rich protein BAG6 isoform X1                                      |
| TCONS_00018691 | 0.675581 | 0.433869  | -0.793089   | BGIOSGA018738 | XP_012699727.1 5-amino-6-(5-phospho-D-ribitylamino)uracil phosphatase, chloroplastic           |
| TCONS_00011073 | 0.675588 | 1.16247   | 0.57153     | BGIOSGA013673 | XP_006650683.1 actin-related protein 7                                                         |
| TCONS_00003693 | 0.67566  | -0.05421  | 0.746021    | BGIOSGA001504 | XP_006645957.1 probable RNA-dependent RNA polymerase SHL2                                      |
| TCONS_00005809 | 0.675662 | 0.640814  | 0.143104    | BGIOSGA022987 | XP_006647139.1 reticulon-like protein B2                                                       |
| TCONS_00019423 | 0.675952 | 0.120968  | 1.0628      | BGIOSGA017931 | XP_006655372.2 uracil phosphoribosyltransferase                                                |
| TCONS_00018737 | 0.675985 | 1.1286    | 0.616741    | BGIOSGA018680 | XP_003568801.1protein SLOW GREEN 1, chloroplastic                                              |
| TCONS_00006368 | 0.676034 | -0.201923 | 1.20988     | BGIOSGA013285 | XP_006650783.1 ribosomal RNA-processing protein 8                                              |
| TCONS_00000831 | 0.676779 | 0.992737  | 0.180543    | BGIOSGA019225 | XP_015689057.1 Golgi apparatus membrane protein-like protein ECHIDNA                           |
| TCONS_00021548 | 0.677124 | 1.02042   | 0.197261    | BGIOSGA022003 | XP_002436414.1magnesium protoporphyrin IX methyltransferase, chloroplastic                     |
| TCONS_00028516 | 0.677272 | 0.558067  | -0.168492   | #N/A          | #N/A                                                                                           |
| TCONS_00022404 | 0.677323 | 1.26345   | 1.00803     | BGIOSGA031780 | NP_001132839.1Ras protein RIC2                                                                 |
| TCONS_00016003 | 0.677348 | -1.01374  | 0.085187    | BGIOSGA038471 | XP_002447953.1short-chain dehydrogenase cctT                                                   |
| TCONS_00004668 | 0.677509 | 1.02673   | 1.32653     | BGIOSGA020008 | XP_015699279.1 seIT-like protein                                                               |
| TCONS_00011995 | 0.677802 | -0.16194  | 0.00386484  | BGIOSGA000182 | XP_006650184.1PREDICTED: uncharacterized protein LOC102718528                                  |
| TCONS_00030116 | 0.677938 | -0.191084 | -0.460463   | BGIOSGA030468 | XP_006661275.1 transmembrane protein 87B-like                                                  |
| TCONS_00013384 | 0.67808  | 0.793052  | 1.61373     | BGIOSGA030777 | XP_006650766.2 probable cellulose synthase A catalytic subunit 2 [UDP-forming]                 |
| TCONS_00017867 | 0.678191 | 0.54462   | 0.437464    | BGIOSGA019919 | XP_006654446.1 transmembrane protein 18-like                                                   |
| TCONS_00001984 | 0.678577 | 0.756886  | 0.226007    | BGIOSGA017791 | XP_006644845.1 metacaspase-4-like isoform X1                                                   |
| TCONS_00004722 | 0.678633 | 0.904303  | 0.728544    | BGIOSGA019972 | XP_006645008.1 PRA1 family protein A1-like                                                     |
| TCONS_00011147 | 0.678646 | 0.920481  | 0.97071     | BGIOSGA013747 | XP_006651917.2 vacuolar protein sorting-associated protein 35B                                 |

transcriptome

|                |          |            |            |               |                                                                                        |
|----------------|----------|------------|------------|---------------|----------------------------------------------------------------------------------------|
| TCONS_00027059 | 0.678658 | 0.298202   | 0.388105   | BGIOSGA011729 | XP_006659653.1 hydroxymethylglutaryl-CoA synthase-like                                 |
| TCONS_00000619 | 0.67873  | 0.966617   | 0.759965   | BGIOSGA003202 | XP_004967773.1 mediator of RNA polymerase II transcription subunit 27                  |
| TCONS_00006320 | 0.679517 | -0.1586    | 0.240039   | BGIOSGA022582 | XP_006648780.1 beta-1,3-galactosyltransferase 15-like                                  |
| TCONS_00021379 | 0.679642 | -2.34671   | -0.121168  | BGIOSGA011126 | XP_004966466.1 chaperone protein dnaJ 11, chloroplastic                                |
| TCONS_00027025 | 0.679941 | 1.17506    | -0.426066  | BGIOSGA029075 | XP_006659641.1 PREDICTED: uncharacterized protein LOC102706312                         |
| TCONS_00021566 | 0.680101 | -0.622328  | 0.724252   | BGIOSGA029874 | XP_015693768.1 enolase 1                                                               |
| TCONS_00025048 | 0.68013  | -0.378145  | 0.467996   | BGIOSGA024359 | XP_002452586.2 uncharacterized protein LOC8075741                                      |
| TCONS_00021356 | 0.680234 | 0.482487   | 1.08378    | BGIOSGA023584 | XP_003563539.1 uncharacterized protein LOC100828468                                    |
| TCONS_00024427 | 0.680285 | 0.780067   | 0.482289   | BGIOSGA031499 | XP_006657387.2 uncharacterized GPI-anchored protein At1g61900                          |
| TCONS_00027943 | 0.680308 | 1.22296    | 1.21291    | BGIOSGA006218 | XP_006660092.2 thioredoxin-like protein CITRX, chloroplastic                           |
| TCONS_00028672 | 0.680847 | -0.617356  | -1.4246    | BGIOSGA017908 | XP_008240942.1 PREDICTED: uncharacterized protein LOC103339425                         |
| TCONS_00014515 | 0.681075 | -0.403629  | -0.625513  | BGIOSGA009689 | NP_001140927.1 exp1 protein precursor                                                  |
| TCONS_00007474 | 0.681396 | 1.09588    | 2.10128    | BGIOSGA007010 | XP_015689535.1 BRCA1-associated protein                                                |
| TCONS_00037952 | 0.681411 | 1.06162    | 0.0142561  | BGIOSGA008334 | XP_006661977.1 glutathione S-transferase U17-like                                      |
| TCONS_00024132 | 0.681604 | 2.17079    | 0.488255   | BGIOSGA010614 | XP_015695167.1 serine/arginine-rich splicing factor SC35-like isoform X1               |
| TCONS_00009764 | 0.682173 | 0.870388   | 1.10099    | BGIOSGA007740 | XP_015690589.1 PREDICTED: uncharacterized protein LOC102709820                         |
| TCONS_00029303 | 0.682195 | 0.554218   | -0.0708098 | BGIOSGA029040 | XP_004957283.1 proteasome subunit beta type-1                                          |
| TCONS_00033840 | 0.682273 | 1.74409    | 0.334009   | #N/A          | #N/A                                                                                   |
| TCONS_00015848 | 0.682807 | 0.610611   | 0.878878   | BGIOSGA017458 | XP_006652252.1 PREDICTED: uncharacterized protein LOC102722388                         |
| TCONS_00009864 | 0.683083 | 1.38503    | 0.734373   | BGIOSGA023669 | XP_006649930.1 eukaryotic translation initiation factor 2 subunit alpha-like           |
| TCONS_00021968 | 0.683085 | -0.23765   | 0.36667    | BGIOSGA025507 | XP_006655963.1 PREDICTED: uncharacterized protein LOC102707968                         |
| TCONS_00015886 | 0.683489 | -1.36849   | -0.922995  | BGIOSGA015104 | XP_003579736.2 RNA-binding motif protein, X-linked-like-3                              |
| TCONS_00019253 | 0.684048 | 0.415632   | 0.487228   | BGIOSGA018096 | XP_003568498.1 cytochrome b-c1 complex subunit 9                                       |
| TCONS_00026013 | 0.684331 | -0.0923453 | 0.0192535  | BGIOSGA028086 | XP_006659178.1 sm-like protein LSM7                                                    |
| TCONS_00010937 | 0.68438  | -0.86366   | -2.44362   | BGIOSGA013545 | XP_006650572.1 PREDICTED: uncharacterized protein LOC102714273                         |
| TCONS_00017765 | 0.684457 | 0.0524082  | 0.329609   | BGIOSGA028250 | XP_006654368.1 endo-1,3;1,4-beta-D-glucanase-like                                      |
| TCONS_00010080 | 0.684712 | 1.12678    | 0.688573   | BGIOSGA012625 | XP_015698612.1 PREDICTED: uncharacterized protein LOC107305446                         |
| TCONS_00008494 | 0.684712 | 0.174089   | 0.731641   | BGIOSGA031548 | XP_006648885.1 cytochrome b5-like                                                      |
| TCONS_00035754 | 0.685093 | 1.60416    | 0.570717   | BGIOSGA002317 | XP_006663910.1 receptor-like protein 12                                                |
| TCONS_00027690 | 0.685244 | -0.817615  | -0.580362  | BGIOSGA036343 | XP_015695554.1 F-box protein SKIP1-like                                                |
| TCONS_00007102 | 0.685432 | 0.450223   | -0.0391725 | BGIOSGA023891 | XP_010235960.1 alcohol dehydrogenase class-3                                           |
| TCONS_00026532 | 0.68559  | 1.30944    | 0.673123   | BGIOSGA007658 | XP_006647227.1 T-complex protein 1 subunit delta                                       |
| TCONS_00018692 | 0.685723 | -0.389194  | -1.13047   | BGIOSGA008949 | XP_006647311.1 transmembrane 9 superfamily member 12-like                              |
| TCONS_00019238 | 0.686027 | 0.0876207  | 1.15066    | BGIOSGA018109 | XP_003566273.1 pentatricopeptide repeat-containing protein At1g09900                   |
| TCONS_00012730 | 0.686033 | 0.611239   | -1.55284   | BGIOSGA005991 | XP_006650308.1 protein DMR6-LIKE                                                       |
| TCONS_00019799 | 0.686222 | 1.61536    | -1.17124   | BGIOSGA009466 | OXYGENASE 2-like                                                                       |
| TCONS_00035851 | 0.686977 | 1.35945    | 1.32665    | BGIOSGA022903 | XP_006654793.1 ras-related protein RABA1f                                              |
| TCONS_00029019 | 0.68731  | 1.45325    | 0.927645   | BGIOSGA022813 | XP_006656800.1 pentatricopeptide repeat-containing protein OGR1, mitochondrial         |
| TCONS_00009910 | 0.687683 | 1.15921    | 0.266491   | BGIOSGA012464 | XP_011461813.1 cytochrome c oxidase copper chaperone 1-like                            |
| TCONS_00029681 | 0.687942 | 0.190673   | 0.169122   | BGIOSGA008736 | XP_006649963.1 PREDICTED: uncharacterized protein LOC102722941                         |
| TCONS_00035615 | 0.688021 | -2.13718   | -0.849548  | #N/A          | XP_006660470.1 serine/threonine-protein kinase D6PK-like                               |
| TCONS_00003506 | 0.688098 | 1.02899    | 2.2031     | BGIOSGA012303 | #N/A                                                                                   |
| TCONS_00024318 | 0.688439 | 0.652276   | 1.2943     | BGIOSGA034412 | XP_006644155.1 serine/threonine-protein phosphatase PP1-like                           |
| TCONS_00010437 | 0.68853  | 1.56205    | 0.368624   | BGIOSGA013029 | XP_004958643.1 protein SRC2                                                            |
| TCONS_00030850 | 0.688553 | 0.93179    | 1.093      | BGIOSGA032657 | XP_006650302.1 inositol monophosphatase 3                                              |
| TCONS_00032705 | 0.688743 | -0.224275  | 0.988606   | BGIOSGA031404 | XP_006665096.1 PREDICTED: uncharacterized protein LOC102702249                         |
| TCONS_00029651 | 0.688885 | 0.893327   | 1.58572    | BGIOSGA030168 | XP_003572074.20-fucosyltransferase 30                                                  |
| TCONS_00026311 | 0.689335 | 0.150855   | 0.679823   | BGIOSGA028397 | XP_006660447.1 FRIGIDA-like protein 3                                                  |
| TCONS_00003958 | 0.689357 | 1.12541    | -0.0665538 | BGIOSGA001234 | XP_006659279.1 peptidyl-prolyl cis-trans isomerase CYP28, chloroplastic isoform X2     |
| TCONS_00015549 | 0.689626 | 0.381656   | 1.39013    | BGIOSGA000507 | XP_006646084.1 ABC transporter G family member 36                                      |
| TCONS_00008825 | 0.689968 | 0.696727   | 1.21515    | BGIOSGA029665 | XP_004954267.126S proteasome regulatory subunit 6A homolog                             |
| TCONS_00001678 | 0.690042 | 0.504364   | 1.30639    | BGIOSGA012104 | XP_006647920.2 histidine-tRNA ligase, chloroplastic/mitochondrial                      |
| TCONS_00008869 | 0.690419 | 0.335594   | 0.872869   | BGIOSGA005543 | XP_003569667.1 probable mitochondrial-processing peptidase subunit beta, mitochondrial |
| TCONS_00008927 | 0.690467 | 1.33113    | 1.97562    | BGIOSGA028777 | XP_006665070.1 prolyl-tRNA synthetase associated domain-containing protein 1           |
| TCONS_00011027 | 0.690499 | -2.40978   | -0.122828  | BGIOSGA034920 | XP_006648013.1 chaperone protein DnaJ-like                                             |
|                |          |            |            |               | XP_010229320.1 uncharacterized protein LOC104581898                                    |

transcriptome

|                |          |            |             |               |                                                                                                   |
|----------------|----------|------------|-------------|---------------|---------------------------------------------------------------------------------------------------|
| TCONS_00023182 | 0.690635 | 0.633718   | 0.841803    | BGIOSGA028447 | NP_001151302.1F-box domain containing protein<br>XP_006664505.1 telomerase reverse                |
| TCONS_00037037 | 0.69088  | -0.343579  | 0.0202188   | BGIOSGA036339 | transcriptase<br>XP_006665051.1 ATP synthase subunit gamma,                                       |
| TCONS_00030884 | 0.691265 | 0.499177   | 0.48804     | BGIOSGA032684 | mitochondrial<br>XP_015698397.1 probable inactive purple acid                                     |
| TCONS_00037410 | 0.692159 | 1.38456    | 0.489906    | BGIOSGA029476 | phosphatase 1                                                                                     |
| TCONS_00026341 | 0.692162 | -1.30047   | -0.807494   | #N/A          | #N/A                                                                                              |
| TCONS_00035574 | 0.692162 | #NA        | 0.192506    | #N/A          | #N/A                                                                                              |
| TCONS_00036979 | 0.692504 | -0.329511  | -1.37558    | BGIOSGA018502 | XP_021321955.1disease resistance protein<br>RPM1                                                  |
| TCONS_00017459 | 0.692633 | -3.20414   | 1.01641     | BGIOSGA019533 | XP_006654213.1PREDICTED: uncharacterized<br>protein LOC102718927                                  |
| TCONS_00013410 | 0.693033 | 0.306178   | -0.52175    | BGIOSGA009572 | XP_006650787.1 probable<br>methylene tetrahydrofolate reductase                                   |
| TCONS_00031123 | 0.693045 | -0.103793  | 0.619066    | BGIOSGA032939 | XP_015696998.1 pentatricopeptide repeat-<br>containing protein At5g61370, mitochondrial-like      |
| TCONS_00008176 | 0.693176 | 1.02146    | 2.05261     | BGIOSGA006263 | XP_006647371.1 GPN-loop GTPase 2                                                                  |
| TCONS_00008239 | 0.693683 | 1.02086    | 0.745126    | BGIOSGA014963 | XP_006647413.1 NAP1-related protein 2                                                             |
| TCONS_00020412 | 0.693765 | 1.30711    | 0.598204    | BGIOSGA022597 | XP_006655949.1 protease Do-like 9<br>XP_006656093.1 protein BOLA4,<br>chloroplastic/mitochondrial |
| TCONS_00020735 | 0.694036 | 0.825489   | 0.388278    | BGIOSGA022927 | XP_006653723.1 myb-related protein Zm1-like                                                       |
| TCONS_00016528 | 0.694232 | -3.07126   | -1.0847     | BGIOSGA007316 | XP_006647345.1 mitochondrial fission protein<br>ELM1-like                                         |
| TCONS_00006203 | 0.694233 | 1.66357    | 1.33445     | BGIOSGA016367 | XP_003561781.1dirigent protein 1                                                                  |
| TCONS_00033930 | 0.694427 | -7.0705    | -0.631      | BGIOSGA024969 | XP_006662337.1 uncharacterized<br>oxidoreductase At4g09670-like                                   |
| TCONS_00031059 | 0.694535 | 0.971978   | -0.0233352  | BGIOSGA030656 | XP_008650908.1AT hook-containing MAR<br>binding 1-like protein isoform X1                         |
| TCONS_00024123 | 0.694659 | 1.40933    | 0.472243    | BGIOSGA032032 | XP_015693011.1 V-type proton ATPase subunit<br>C isoform X2                                       |
| TCONS_00019911 | 0.694932 | 0.851329   | 0.564911    | BGIOSGA017451 | XP_004976449.1protein<br>TRIGALACTOSYLDIACYLGLYCEROL 1,<br>chloroplastic                          |
| TCONS_00014721 | 0.694934 | 1.32928    | 0.409549    | BGIOSGA016895 | XP_006645204.1PREDICTED: uncharacterized<br>protein LOC102719341                                  |
| TCONS_00004940 | 0.695289 | 0.704018   | 0.153916    | BGIOSGA000281 | XP_015690184.1 thioredoxin-like protein<br>HCF164, chloroplastic                                  |
| TCONS_00013233 | 0.695319 | 1.8065     | 0.688196    | BGIOSGA011889 | XP_003562016.1kxDL motif-containing protein 1                                                     |
| TCONS_00012794 | 0.695525 | 0.617702   | 0.786409    | BGIOSGA029383 | XP_006647203.1 dnaJ homolog subfamily B<br>member 4-like                                          |
| TCONS_00005904 | 0.695542 | 0.879762   | -0.213325   | BGIOSGA028777 | XP_004985893.1anthranilate<br>phosphoribosyltransferase, chloroplastic                            |
| TCONS_00011479 | 0.696062 | 1.36582    | 0.738265    | BGIOSGA011546 | XP_015690126.1 protein trichome birefringence-<br>like 33                                         |
| TCONS_00013422 | 0.696286 | -4.52378   | -1.70713    | BGIOSGA017466 | XP_006650004.1 endoplasmic reticulum-Golgi<br>intermediate compartment protein 3-like             |
| TCONS_00012167 | 0.69629  | 1.05626    | 1.0045      | BGIOSGA014979 | XP_006659428.1PREDICTED: uncharacterized<br>protein LOC102714113                                  |
| TCONS_00026652 | 0.69681  | 1.94336    | 1.29805     | BGIOSGA030745 | XP_004951214.1probable receptor-like protein<br>kinase At1g33260                                  |
| TCONS_00007206 | 0.696859 | -2.10946   | -1.46063    | BGIOSGA028353 | XP_015696938.1 UTP:RNA uridylyltransferase 1-<br>like                                             |
| TCONS_00030829 | 0.697045 | 0.660658   | 0.382886    | BGIOSGA031468 | XP_015695758.1 protein CHAPERONE-LIKE<br>PROTEIN OF POR1, chloroplastic-like                      |
| TCONS_00026607 | 0.697778 | 0.0118767  | 2.43131     | BGIOSGA028668 | NP_001316335.1uncharacterized<br>LOC103633003                                                     |
| TCONS_00036029 | 0.697781 | -0.370798  | 0.56516     | BGIOSGA037393 | XP_006662830.2 glucuronokinase 1-like                                                             |
| TCONS_00033178 | 0.698124 | 0.404461   | 0.439138    | BGIOSGA035013 | XP_015698842.1 mitochondrial substrate carrier<br>family protein C-like                           |
| TCONS_00036521 | 0.698336 | 0.314553   | 0.397504    | BGIOSGA036816 | XP_015690240.1 CRS2-like protein, chloroplastic                                                   |
| TCONS_00010067 | 0.698347 | -0.0413106 | 0.654099    | BGIOSGA020490 | XP_006655994.1 signal peptidase complex<br>catalytic subunit SEC11A-like                          |
| TCONS_00022050 | 0.698368 | -0.0840864 | 0.156821    | BGIOSGA021466 | XP_015688119.1 leucine-tRNA ligase,<br>chloroplastic/mitochondrial                                |
| TCONS_00002724 | 0.698374 | 0.697626   | 1.0701      | BGIOSGA002499 | XP_015690980.1 cinnamoyl-CoA reductase 1                                                          |
| TCONS_00011222 | 0.698995 | 0.781279   | -0.00488654 | BGIOSGA029525 | XP_015689819.1 probable inactive receptor<br>kinase At1g48480                                     |
| TCONS_00009597 | 0.699414 | -2.62762   | #NA         | BGIOSGA020466 | XP_006657664.1 mitochondrial pyruvate carrier 4-<br>like                                          |
| TCONS_00025028 | 0.699562 | 1.45019    | 1.16126     | BGIOSGA025924 | NP_001306640.1protein LUTEIN DEFICIENT 5,<br>chloroplastic                                        |
| TCONS_00009048 | 0.699703 | 2.04633    | -1.14973    | BGIOSGA005357 | XP_004981213.1mitochondrial import inner<br>membrane translocase subunit TIM10                    |
| TCONS_00013452 | 0.699884 | 0.422896   | 0.172885    | BGIOSGA024541 | XP_015692699.1PREDICTED: uncharacterized<br>protein LOC102704064, partial                         |
| TCONS_00019766 | 0.700173 | 1.09089    | 1.402       | BGIOSGA004197 | XP_006652086.2PREDICTED: uncharacterized<br>protein LOC102714910                                  |
| TCONS_00015251 | 0.700302 | 1.35733    | 1.08977     | BGIOSGA015731 | XP_006656574.2 glutamate<br>formimidoyltransferase                                                |
| TCONS_00020042 | 0.700312 | 0.786279   | -1.22528    | BGIOSGA022053 | XP_002446782.1uncharacterized protein<br>At4g13200, chloroplastic                                 |
| TCONS_00014590 | 0.700649 | 1.4255     | 0.535905    | BGIOSGA013026 | XP_003571721.1uncharacterized protein<br>LOC100840322                                             |
| TCONS_00031963 | 0.700674 | -5.53611   | -3.54811    | BGIOSGA011093 | XP_006655888.1 G-protein coupled receptor 1                                                       |
| TCONS_00020287 | 0.700977 | 1.8729     | 0.8126      | BGIOSGA022485 | XP_015699222.1 dual-specificity RNA<br>methyltransferase RlmN                                     |
| TCONS_00004056 | 0.701274 | 0.370028   | 0.822958    | BGIOSGA001140 | XP_006650561.1 deoxyhypusine synthase-like                                                        |
| TCONS_00030059 | 0.701584 | -0.0998478 | -0.228437   | BGIOSGA029750 | XP_006663109.1 transcription factor MYB108-<br>like                                               |
| TCONS_00032434 | 0.701698 | -0.317182  | -0.831696   | BGIOSGA026430 |                                                                                                   |
| TCONS_00000606 | 0.701898 | 0.727673   | 0.727942    | BGIOSGA003191 | XP_006645732.1 transcription factor Pur-alpha 1                                                   |



## transcriptome

|                |          |            |            |               |                                                                                                |
|----------------|----------|------------|------------|---------------|------------------------------------------------------------------------------------------------|
| TCONS_00014763 | 0.702214 | 0.503015   | 0.655719   | BGIOSGA006296 | XP_006652653.1 WD repeat-containing protein 44-like                                            |
| TCONS_00012080 | 0.702226 | 0.984263   | 0.234446   | BGIOSGA009501 | XP_002463438.1 uncharacterized protein LOC8084976                                              |
| TCONS_00029734 | 0.702375 | 2.12736    | 1.86259    | BGIOSGA001769 | XP_006660491.1 30S ribosomal protein 2, chloroplastic                                          |
| TCONS_00030971 | 0.703083 | 0.927473   | 1.12723    | BGIOSGA033336 | XP_006661719.1 probable glutathione S-transferase GSTU6                                        |
| TCONS_00014069 | 0.703309 | 1.58986    | 0.352252   | BGIOSGA000755 | XP_015692410.1 protein DETOXIFICATION 16-like                                                  |
| TCONS_00007146 | 0.703608 | -0.746569  | 0.379383   | BGIOSGA009332 | XP_006649190.2 methionine adenosyltransferase 2 subunit beta                                   |
| TCONS_00008448 | 0.703845 | 0.280263   | 0.222045   | BGIOSGA013390 | XP_004953202.1 protein PEROXIN-4                                                               |
| TCONS_00020075 | 0.704025 | 0.147494   | 0.796759   | BGIOSGA022255 | XP_015693722.1 ATP-dependent Clp protease proteolytic subunit-related protein 2, chloroplastic |
| TCONS_00013217 | 0.7042   | 0.0229475  | 0.18456    | BGIOSGA013616 | XP_006650634.1 casein kinase II subunit alpha                                                  |
| TCONS_00029398 | 0.70461  | -1.10494   | -0.503458  | BGIOSGA031150 | XP_002460450.2 OTU domain-containing protein At3g57810 isoform X1                              |
| TCONS_00014736 | 0.704948 | 0.389008   | 0.996422   | BGIOSGA016913 | XP_006652636.2 thioredoxin-like 3-3                                                            |
| TCONS_00036562 | 0.705311 | -1.34243   | 0.229494   | BGIOSGA007670 | XP_004978523.1 probable WRKY transcription factor 62                                           |
| TCONS_00012189 | 0.705792 | 1.94442    | 1.17604    | BGIOSGA012542 | XP_003558000.1 ricin B-like lectin R40C1                                                       |
| TCONS_00032693 | 0.705857 | -0.469594  | -0.0652334 | BGIOSGA030579 | XP_006662053.1 S-norcoclaurine synthase 1-like                                                 |
| TCONS_00031579 | 0.706305 | 0.74959    | -0.334153  | BGIOSGA033394 | NP_001145066.1 uncharacterized LOC100278262 precursor                                          |
| TCONS_00018269 | 0.706668 | 0.800078   | 1.28761    | BGIOSGA030586 | XP_006654755.1 syntaxin-71                                                                     |
| TCONS_00011398 | 0.706759 | 0.494476   | 0.460475   | BGIOSGA033439 | XP_006649223.2 quinone oxidoreductase 1-like isoform X2                                        |
| TCONS_00028085 | 0.706896 | 0.718642   | 0.477222   | BGIOSGA026907 | NP_001328050.1 Splicing factor 3B subunit 5/RDS3 complex subunit 10                            |
| TCONS_00002267 | 0.707204 | 0.778257   | 0.0759142  | BGIOSGA022876 | XP_002456723.1 serine hydroxymethyltransferase 7                                               |
| TCONS_00011064 | 0.707366 | 2.0667     | 2.09271    | BGIOSGA021674 | XP_006650677.1 inosine-5'-monophosphate dehydrogenase-like                                     |
| TCONS_00013489 | 0.708039 | -0.609728  | 0.434024   | BGIOSGA025452 | XP_006650858.1 guanine deaminase-like                                                          |
| TCONS_00013068 | 0.708289 | 0.0974133  | -0.585323  | BGIOSGA014945 | XP_006650500.1 anthranilate synthase beta subunit 2, chloroplastic                             |
| TCONS_00024216 | 0.708299 | 0.732161   | 0.15007    | BGIOSGA020512 | XP_006658044.1 NADH dehydrogenase [ubiquinone] flavoprotein 1, mitochondrial                   |
| TCONS_00000538 | 0.708327 | 0.559712   | 0.556657   | BGIOSGA032111 | XP_006643978.1 PREDICTED: uncharacterized protein LOC102712021                                 |
| TCONS_00024198 | 0.708545 | 0.325042   | -0.215805  | BGIOSGA004281 | XP_006658024.1 NADH dehydrogenase [ubiquinone] 1 alpha subcomplex subunit 6                    |
| TCONS_00009116 | 0.708693 | -0.781059  | -0.21555   | BGIOSGA011642 | XP_015699039.1 PREDICTED: uncharacterized protein LOC102712417                                 |
| TCONS_00001815 | 0.708932 | -0.0923879 | -0.732665  | BGIOSGA004452 | XP_015699290.1 putative RNA-binding protein YimH isoform X2                                    |
| TCONS_00011141 | 0.709182 | 1.42916    | 0.828752   | BGIOSGA013741 | XP_015690111.1 probable GTP-binding protein OBG2                                               |
| TCONS_00027958 | 0.70945  | 0.565433   | -0.0091999 | BGIOSGA027038 | XP_003574414.1 uncharacterized protein LOC100846834                                            |
| TCONS_00007329 | 0.709993 | -2.6802    | -1.04088   | BGIOSGA021229 | XP_012704165.1 achilleol B synthase isoform X1                                                 |
| TCONS_00008506 | 0.71001  | 0.495636   | 0.221442   | BGIOSGA000160 | XP_006647615.1 vesicle-associated protein 2-1                                                  |
| TCONS_00000614 | 0.710169 | -0.846409  | 0.309008   | BGIOSGA003197 | XP_006644022.2 transmembrane protein 136-like                                                  |
| TCONS_00023943 | 0.710172 | 0.151087   | 0.788016   | BGIOSGA025975 | XP_006658715.1 ribosome-recycling factor, chloroplastic                                        |
| TCONS_00020844 | 0.710414 | 1.43891    | 1.29209    | BGIOSGA024073 | XP_015694259.1 T-complex protein 1 subunit gamma                                               |
| TCONS_00005769 | 0.710707 | 0.362232   | 0.664527   | BGIOSGA009950 | XP_006647117.1 prefoldin subunit 6                                                             |
| TCONS_00005385 | 0.710772 | 0.0857122  | 1.28904    | BGIOSGA008357 | XP_006648298.2 glucan endo-1,3-beta-glucosidase 6-like                                         |
| TCONS_00003941 | 0.710859 | 1.67899    | 1.28335    | BGIOSGA020469 | XP_006644343.1 PREDICTED: uncharacterized protein LOC102702791                                 |
| TCONS_00019719 | 0.710905 | -0.176471  | -0.155888  | BGIOSGA004291 | NP_001148662.1 uncharacterized protein LOC100282278                                            |
| TCONS_00008993 | 0.710964 | 0.42861    | 0.308229   | BGIOSGA015423 | XP_006648069.2 26S protease regulatory subunit 6A homolog                                      |
| TCONS_00009480 | 0.711019 | 0.249909   | 0.102921   | BGIOSGA026022 | XP_015690825.1 scarecrow-like protein 21                                                       |
| TCONS_00014336 | 0.711022 | 1.33748    | 1.40213    | BGIOSGA008458 | XP_006652339.1 PREDICTED: uncharacterized protein LOC102700888                                 |
| TCONS_00015043 | 0.711195 | 0.473676   | 0.680989   | BGIOSGA005627 | XP_006659173.1 cutlin-3A-like                                                                  |
| TCONS_00010991 | 0.711618 | 0.38672    | 0.600129   | BGIOSGA021445 | XP_006650618.1 26S proteasome non-ATPase regulatory subunit 10                                 |
| TCONS_00021661 | 0.71187  | 1.20768    | -0.21058   | BGIOSGA033011 | XP_015694288.1 soluble starch synthase 1, chloroplastic/amyloplastic                           |
| TCONS_00023190 | 0.712702 | 0.837175   | 0.540955   | BGIOSGA013552 | XP_015695227.1 PREDICTED: uncharacterized protein LOC102700914                                 |
| TCONS_00001384 | 0.712725 | 0.694794   | 0.685628   | BGIOSGA023017 | XP_015699310.1 PREDICTED: uncharacterized protein LOC102713682                                 |
| TCONS_00010841 | 0.713109 | 1.29972    | 0.571356   | BGIOSGA031952 | XP_015690042.1 probable histidine kinase 4                                                     |
| TCONS_00036610 | 0.713207 | 1.2493     | 1.9471     | BGIOSGA034570 | XP_015697769.1 mitochondrial import inner membrane translocase subunit TIM8                    |
| TCONS_00025367 | 0.71336  | 1.14199    | 1.04676    | BGIOSGA016994 | XP_006657859.1 calcium-dependent protein kinase 8-like                                         |
| TCONS_00035853 | 0.71342  | -0.0192323 | -0.428125  | BGIOSGA019417 | XP_006663941.1 WEB family protein At5g55860                                                    |
| TCONS_00032029 | 0.713499 | 0.367422   | 0.96314    | BGIOSGA032113 | XP_015697424.1 CASP-like protein 5A2                                                           |
| TCONS_00007111 | 0.714277 | -0.0802106 | 0.341754   | BGIOSGA009295 | XP_006648116.1 PREDICTED: uncharacterized protein LOC102718989                                 |
| TCONS_00020134 | 0.714335 | 0.591933   | 0.535657   | BGIOSGA023597 | XP_015693451.1 B-box zinc finger protein 22-like                                               |
| TCONS_00001680 | 0.714402 | 0.260108   | -1.90011   | BGIOSGA020897 | XP_004969722.3 glycine dehydrogenase (decarboxylating), mitochondrial-like                     |

transcriptome

|                |          |             |           |               |                                                                                                               |
|----------------|----------|-------------|-----------|---------------|---------------------------------------------------------------------------------------------------------------|
| TCONS_00005501 | 0.714605 | -1.42206    | 0.295162  | BGIOSGA004491 | XP_006448872.1tubulin beta chain isoform X2                                                                   |
| TCONS_00023996 | 0.714741 | 1.29323     | 1.57799   | BGIOSGA011361 | XP_006657895.1 putative MO25-like protein At5g47540                                                           |
| TCONS_00003728 | 0.714749 | -0.404463   | 0.737837  | BGIOSGA014293 | XP_012701442.1cysteine-rich receptor-like protein kinase 15                                                   |
| TCONS_00017031 | 0.714916 | 0.0450752   | 0.552414  | BGIOSGA019079 | XP_006653985.1PREDICTED: uncharacterized protein LOC102722116                                                 |
| TCONS_00021966 | 0.715124 | -0.115432   | -1.16999  | BGIOSGA002433 | XP_006644049.1PREDICTED: uncharacterized protein LOC102708379                                                 |
| TCONS_00034175 | 0.715503 | -1.25341    | 0.529501  | BGIOSGA007670 | XP_004978523.1probable WRKY transcription factor 62                                                           |
| TCONS_00016638 | 0.71561  | 0.331412    | 0.150723  | BGIOSGA001116 | XP_006652846.1 transcription factor GTE2-like XP_006652276.2 succinate dehydrogenase subunit 5, mitochondrial |
| TCONS_00014234 | 0.716115 | 1.1353      | 0.248678  | BGIOSGA016387 | XP_006662520.1PREDICTED: uncharacterized protein LOC102718398                                                 |
| TCONS_00031476 | 0.716164 | 0.231177    | 0.527855  | BGIOSGA033291 | XP_006658985.1 rhodanese-like/PpiC domain-containing protein 12, chloroplastic                                |
| TCONS_00024385 | 0.716224 | 1.34261     | 1.30839   | BGIOSGA026427 | XP_006650293.1 isoaspartyl peptidase/L-asparaginase 1                                                         |
| TCONS_00012662 | 0.716312 | 0.93143     | -1.08549  | BGIOSGA017254 | XP_006654201.1 ras-related protein RGP2                                                                       |
| TCONS_00018982 | 0.716626 | -0.882213   | -1.02739  | BGIOSGA020538 | XP_006647970.1 proteasome subunit beta type-6-like                                                            |
| TCONS_00021574 | 0.716648 | 0.356969    | 0.321176  | BGIOSGA005534 | XP_006664452.1 adenylate kinase 3                                                                             |
| TCONS_00035792 | 0.716692 | 0.348842    | 0.340342  | BGIOSGA034093 | XP_015690776.1 carbon catabolite-derepressing protein kinase-like                                             |
| TCONS_00009835 | 0.716747 | 0.951658    | 0.897793  | BGIOSGA025331 | NP_001314799.1 uncharacterized LOC103626562                                                                   |
| TCONS_00005339 | 0.717227 | 0.0523458   | -0.269543 | BGIOSGA007447 | XP_006650548.1 folate transporter 1, chloroplastic                                                            |
| TCONS_00013128 | 0.717406 | 2.20362     | 1.86872   | BGIOSGA032644 | XP_006655935.1 transcription factor TCP14-like                                                                |
| TCONS_00020389 | 0.718074 | 1.06527     | 1.2821    | BGIOSGA019094 | XP_015696872.1 acetyl-CoA acetyltransferase, cytosolic 1-like                                                 |
| TCONS_00028617 | 0.718288 | 0.76692     | 0.281572  | BGIOSGA002627 | #N/A                                                                                                          |
| TCONS_00024452 | 0.718343 | -0.00746166 | 0.678297  | #N/A          | #N/A                                                                                                          |
| TCONS_00022612 | 0.718646 | -0.117263   | -0.456214 | BGIOSGA007825 | XP_015694454.1 nudix hydrolase 2                                                                              |
| TCONS_00032900 | 0.719245 | 1.09724     | 0.014845  | BGIOSGA001894 | XP_015699121.1 calmodulin-binding protein 25-like                                                             |
| TCONS_00010668 | 0.719478 | 1.54629     | 2.6934    | BGIOSGA019389 | XP_015698376.1 glycine-rich RNA-binding protein GRP1A-like                                                    |
| TCONS_00002348 | 0.719548 | 1.95819     | 1.29459   | BGIOSGA004989 | XP_015692088.1PREDICTED: uncharacterized protein LOC102712314 isoform X2                                      |
| TCONS_00026419 | 0.719772 | -0.269127   | 0.99737   | BGIOSGA030441 | XP_003573802.1 uncharacterized protein LOC100836363                                                           |
| TCONS_00003863 | 0.72033  | 0.00147398  | -0.488276 | BGIOSGA020277 | XP_006644311.1PREDICTED: uncharacterized protein LOC102717292 isoform X2                                      |
| TCONS_00031318 | 0.720383 | 1.32936     | 0.716247  | BGIOSGA033134 | XP_006664816.1 malate dehydrogenase, cytoplasmic                                                              |
| TCONS_00016688 | 0.720429 | -1.38161    | 0.508642  | BGIOSGA020657 | XP_006652880.1PREDICTED: uncharacterized protein LOC102721919                                                 |
| TCONS_00037159 | 0.720487 | 0.347888    | 0.723381  | BGIOSGA038148 | XP_015698920.1 5-methylthioadenosine/S-adenosylhomocysteine deaminase-like isoform X1                         |
| TCONS_00034161 | 0.720541 | -4.72671    | -1.32169  | BGIOSGA036775 | XP_006664873.1 BTB/POZ domain-containing protein At3g56230-like                                               |
| TCONS_00006513 | 0.720863 | 1.29748     | 0.515772  | BGIOSGA008680 | XP_006647571.1 bifunctional nitrilase/nitrile hydratase NIT4                                                  |
| TCONS_00018607 | 0.721121 | 0.176252    | 1.14385   | BGIOSGA018827 | XP_006654982.2PREDICTED: uncharacterized protein LOC102710786                                                 |
| TCONS_00018843 | 0.721344 | 0.929239    | 1.25655   | BGIOSGA037015 | XP_015693245.1 UDP-galactose transporter 2-like                                                               |
| TCONS_00037222 | 0.72147  | 0.444791    | 0.198758  | BGIOSGA015207 | XP_003576139.1NAD(P)H-quinone oxidoreductase subunit U, chloroplastic                                         |
| TCONS_00016342 | 0.721941 | -0.052927   | 0.455509  | BGIOSGA023488 | XP_024311400.1cyclin-P4-1                                                                                     |
| TCONS_00033796 | 0.722071 | 1.79966     | 0.597452  | BGIOSGA002494 | XP_006663028.2PREDICTED: uncharacterized protein LOC102719334                                                 |
| TCONS_00006710 | 0.722432 | 1.31529     | 1.09986   | BGIOSGA024671 | XP_002454428.13-dehydrosphinganine reductase TSC10A                                                           |
| TCONS_00018570 | 0.722595 | 1.68464     | 0.650696  | BGIOSGA018862 | XP_015692471.1 nitrogen regulatory protein P-II homolog                                                       |
| TCONS_00023162 | 0.722679 | -0.331206   | 1.1023    | BGIOSGA025200 | NP_001338687.1DUF3148 family protein                                                                          |
| TCONS_00027132 | 0.72358  | 0.884162    | -0.329253 | BGIOSGA014213 | XP_006659684.1 KDEL-tailed cysteine endopeptidase CEP1                                                        |
| TCONS_00030291 | 0.723732 | 1.01839     | 1.01363   | BGIOSGA023556 | XP_006660788.1 methyl-CpG-binding domain-containing protein 2-like                                            |
| TCONS_00014687 | 0.723796 | 3.17254     | 1.11392   | #N/A          | #N/A                                                                                                          |
| TCONS_00033490 | 0.723884 | -3.73093    | 0.0623116 | BGIOSGA002287 | XP_004979290.1protein LAZY 1                                                                                  |
| TCONS_00020656 | 0.724154 | -1.56135    | 0.669326  | BGIOSGA025978 | XP_015693567.1 primary amine oxidase-like                                                                     |
| TCONS_00036932 | 0.72512  | 0.378845    | 0.484856  | BGIOSGA036395 | XP_006663931.1 54S ribosomal protein L37, mitochondrial                                                       |
| TCONS_00001579 | 0.725512 | -0.624707   | 0.307118  | BGIOSGA004212 | XP_015688282.1 D-glycerate 3-kinase, chloroplastic isoform X2                                                 |
| TCONS_00000406 | 0.725521 | 0.740058    | 1.44654   | BGIOSGA016551 | XP_015692411.1 14-3-3-like protein GF14-G                                                                     |
| TCONS_00027128 | 0.725645 | -1.08198    | 0.758636  | BGIOSGA031944 | XP_006659680.1 dihydroneopterin aldolase 2-like                                                               |
| TCONS_00012897 | 0.725731 | 0.591463    | 0.941391  | BGIOSGA010086 | XP_004982216.1guanine nucleotide-binding protein subunit beta                                                 |
| TCONS_00001622 | 0.72601  | -0.0540007  | 0.462697  | BGIOSGA017625 | XP_006644536.1 phosphoethanolamine N-methyltransferase 1-like                                                 |
| TCONS_00000388 | 0.726061 | 0.230881    | #NA       | BGIOSGA002162 | NP_001151708.1rho termination factor, N-terminal domain containing protein                                    |
| TCONS_00034488 | 0.726144 | 1.02112     | 0.419298  | BGIOSGA026286 | XP_006662809.1PREDICTED: uncharacterized protein LOC102717289                                                 |
| TCONS_00009194 | 0.726242 | 0.649944    | 0.240831  | BGIOSGA001970 | XP_006649280.1 protein-ribulosamine 3-kinase, chloroplastic isoform X1                                        |

transcriptome

|                |          |            |            |               |                                                                                          |
|----------------|----------|------------|------------|---------------|------------------------------------------------------------------------------------------|
| TCONS_00026781 | 0.726735 | 1.18674    | 1.31297    | BGIOSGA024331 | XP_006659495.1 protein transport protein SEC23                                           |
| TCONS_00004887 | 0.727024 | 1.87137    | 1.22363    | BGIOSGA025454 | XP_006646560.1 calreticulin-3-like                                                       |
| TCONS_00007772 | 0.727062 | 0.90449    | 1.22095    | BGIOSGA006711 | XP_015688549.1 proteinaceous RNase P 1, chloroplastic/mitochondrial-like                 |
| TCONS_00011245 | 0.727135 | -0.618557  | 0.00624025 | BGIOSGA013845 | XP_006651967.1PREDICTED: uncharacterized protein LOC102714280                            |
| TCONS_00027143 | 0.727135 | 0.316902   | -0.764941  | BGIOSGA028055 | NP_001314999.1uncharacterized protein LOC100502427 isoform 2                             |
| TCONS_00011439 | 0.727313 | #NA        | -2.46481   | BGIOSGA030655 | XP_004986014.1probable receptor-like protein kinase At4g10390                            |
| TCONS_00001871 | 0.727752 | 0.285104   | 0.322122   | BGIOSGA013088 | XP_003569879.2 glycerophosphodiester phosphodiesterase GPPD6                             |
| TCONS_00035012 | 0.728116 | -0.53742   | 0.0787917  | BGIOSGA033845 | XP_015690236.1 GDT1-like protein 2, chloroplastic isoform X1                             |
| TCONS_00021621 | 0.728167 | 0.347897   | 0.329046   | BGIOSGA021897 | XP_014753236.1protein WHI3 isoform X2                                                    |
| TCONS_00030902 | 0.728959 | -1.29829   | 0.404399   | BGIOSGA032706 | XP_002457536.1nodulin-related protein 1                                                  |
| TCONS_00025600 | 0.729192 | 2.22674    | 1.6857     | BGIOSGA023832 | XP_015694490.1PREDICTED: uncharacterized protein LOC107304516 isoform X1                 |
| TCONS_00022848 | 0.729192 | 1.44913    | 2.27066    | #N/A          | #N/A                                                                                     |
| TCONS_00026023 | 0.729283 | 0.207386   | 0.873089   | BGIOSGA028095 | XP_006659890.2PREDICTED: uncharacterized protein LOC102713016                            |
| TCONS_00027454 | 0.729621 | 0.800501   | 0.898241   | BGIOSGA004062 | XP_006659177.1 protein RAE1-like                                                         |
| TCONS_00027602 | 0.729649 | 0.744705   | 1.12435    | BGIOSGA027413 | XP_008661708.1uncharacterized LOC100275707 isoform X1                                    |
| TCONS_00029993 | 0.729658 | 0.290025   | 0.890565   | BGIOSGA026957 | XP_006660603.1 type IV inositol polyphosphate 5-phosphatase 9-like                       |
| TCONS_00020181 | 0.729725 | -0.782638  | -0.300864  | BGIOSGA022372 | XP_006655821.1 protein disulfide isomerase-like 1-5                                      |
| TCONS_00006547 | 0.729855 | 0.0295859  | 0.649676   | BGIOSGA027645 | XP_006647604.1 monothiol glutaredoxin-S6                                                 |
| TCONS_00021372 | 0.73007  | 1.51917    | 1.13323    | BGIOSGA028671 | XP_006656486.1 ATPase family AAA domain-containing protein 1-like isoform X1             |
| TCONS_00006833 | 0.730373 | 0.566491   | 0.481809   | BGIOSGA037876 | XP_006647855.1 microtubule-associated protein 70-2                                       |
| TCONS_00018651 | 0.730614 | 0.128783   | 0.481214   | BGIOSGA018784 | XP_006655007.2 gamma-tubulin complex component 4                                         |
| TCONS_00036589 | 0.730655 | 0.5105     | 0.784979   | BGIOSGA034585 | XP_006662694.1PREDICTED: uncharacterized protein LOC102706044                            |
| TCONS_00023812 | 0.730711 | 0.88355    | 1.05034    | BGIOSGA022137 | XP_014753308.1protein ACCELERATED CELL DEATH 6 isoform X1                                |
| TCONS_00007179 | 0.730903 | 1.11837    | 0.696232   | BGIOSGA007318 | XP_006648192.1PREDICTED: uncharacterized protein LOC102717217                            |
| TCONS_00028259 | 0.730908 | 0.288445   | 0.974892   | BGIOSGA026717 | XP_006660257.2 pseudouridine-5'-phosphate glycosidase                                    |
| TCONS_00031410 | 0.73104  | 1.57557    | 1.76322    | BGIOSGA022219 | XP_021306530.1monothiol glutaredoxin-S11 isoform X1                                      |
| TCONS_00011740 | 0.731047 | 1.10944    | 0.0222639  | BGIOSGA011267 | XP_006649582.1 yrdC domain-containing protein, mitochondrial-like                        |
| TCONS_00025547 | 0.731113 | 0.246397   | 0.407449   | BGIOSGA023885 | XP_006657978.1 transcription elongation factor SPT4 homolog 2-like                       |
| TCONS_00024634 | 0.731117 | 1.54618    | 0.903358   | #N/A          | #N/A                                                                                     |
| TCONS_00014289 | 0.731176 | -0.406922  | 0.650246   | BGIOSGA016444 | XP_006653417.1 protein E124 homolog                                                      |
| TCONS_00004401 | 0.731335 | -0.591058  | -0.122246  | BGIOSGA000820 | XP_006646328.1 3-hydroxyisobutyryl-CoA hydrolase-like protein 5                          |
| TCONS_00031669 | 0.731384 | 0.322156   | -0.282717  | BGIOSGA033491 | XP_006662622.1 uncharacterized sugar kinase slr0537                                      |
| TCONS_00006062 | 0.731722 | -1.0798    | -0.891286  | BGIOSGA016972 | XP_015688595.1 phenolic glucoside malonyltransferase 1-like                              |
| TCONS_00017171 | 0.731903 | 0.691912   | 1.33766    | BGIOSGA019390 | XP_006654073.1 DNA-directed RNA polymerase V subunit 7-like                              |
| TCONS_00023877 | 0.732263 | 1.32979    | 0.614797   | BGIOSGA024134 | XP_015694677.1 pentatricopeptide repeat-containing protein At5g42310, mitochondrial-like |
| TCONS_00029144 | 0.732305 | 1.87461    | 0.211115   | BGIOSGA005544 | XP_006660689.1 mitochondrial phosphate carrier protein 3, mitochondrial-like             |
| TCONS_00021453 | 0.732608 | 0.888065   | 0.803597   | BGIOSGA022098 | XP_006655686.1 protein CWC15 homolog                                                     |
| TCONS_00008184 | 0.732656 | 1.42538    | 1.27211    | BGIOSGA006254 | XP_006647382.1 eukaryotic translation initiation factor 2D                               |
| TCONS_00027761 | 0.73271  | -0.95825   | -1.02768   | BGIOSGA000355 | XP_006659275.1 threonine-tRNA ligase, mitochondrial 1                                    |
| TCONS_00021857 | 0.732801 | 0.781107   | -0.271547  | BGIOSGA019900 | XP_006655913.1 MADS-box transcription factor 55                                          |
| TCONS_00002507 | 0.73295  | 1.3826     | 1.47307    | BGIOSGA025801 | XP_015697990.1PREDICTED: uncharacterized protein LOC102704371 isoform X2                 |
| TCONS_00036415 | 0.732983 | -0.406058  | 0.384747   | BGIOSGA037781 | XP_006664185.1 beta-1,4-mannosyl-glycoprotein 4-beta-N-acetylglucosaminyltransferase     |
| TCONS_00036316 | 0.733201 | 1.08536    | 1.22869    | BGIOSGA037680 | XP_004963014.1CSC1-like protein HYP1 isoform X1                                          |
| TCONS_00021999 | 0.733238 | -1.34736   | -0.814954  | BGIOSGA023252 | XP_003563993.11-aminocyclopropane-1-carboxylate oxidase homolog 4                        |
| TCONS_00028584 | 0.733374 | 2.02578    | 1.36867    | BGIOSGA005528 | XP_006660436.2 probable tyrosine-protein phosphatase At1g05000 isoform X2                |
| TCONS_00025539 | 0.733653 | 0.933314   | 0.601701   | BGIOSGA023894 | XP_015694730.1 ATP-dependent RNA helicase DEAH11, chloroplastic-like                     |
| TCONS_00019224 | 0.733805 | -0.0421528 | -0.910583  | BGIOSGA022596 | XP_004962200.1sm-like protein LSM5                                                       |
| TCONS_00017468 | 0.734119 | 1.43122    | 1.37649    | BGIOSGA003155 | XP_006654202.1 E3 ubiquitin-protein ligase hel2                                          |
| TCONS_00029507 | 0.734441 | 0.893584   | 1.42982    | BGIOSGA009917 | XP_006660975.2 ultraviolet-B receptor UVR8                                               |
| TCONS_00019128 | 0.734553 | -2.45015   | -0.313826  | BGIOSGA037857 | XP_004962397.1probable inactive receptor-like protein kinase At3g56050 isoform X2        |
| TCONS_00011048 | 0.734997 | 0.307925   | 0.776373   | BGIOSGA033210 | XP_015690091.1 probable methyltransferase PMT28                                          |
| TCONS_00008253 | 0.735788 | 0.850573   | 0.527417   | BGIOSGA008969 | XP_006647425.1 ASC1-like protein 1 isoform X1                                            |
| TCONS_00004247 | 0.736067 | 0.843813   | 0.196521   | BGIOSGA026025 | XP_014754126.1mitogen-activated protein kinase kinase kinase 17                          |

transcriptome

|                |          |            |            |               |                                                                                        |
|----------------|----------|------------|------------|---------------|----------------------------------------------------------------------------------------|
| TCONS_00031485 | 0.736382 | 0.0504825  | 0.454422   | BGIOSGA033299 | XP_006662525.1 protein COFACTOR ASSEMBLY OF COMPLEX C SUBUNIT B CCB2, chloroplastic    |
| TCONS_00006200 | 0.736407 | 0.389627   | 1.55047    | BGIOSGA008362 | XP_006660598.1 N-carbamoylputrescine amidase                                           |
| TCONS_00001186 | 0.736612 | 0.795529   | 1.22491    | BGIOSGA019984 | XP_015699228.1 ATP-dependent zinc metalloprotease FTSH 5, mitochondrial isoform X1     |
| TCONS_00011020 | 0.73689  | 0.447786   | 1.31483    | BGIOSGA013623 | XP_015690323.1 PREDICTED: uncharacterized protein LOC102700979                         |
| TCONS_00025724 | 0.737439 | -0.311171  | 0.0611652  | BGIOSGA011007 | XP_006658977.1 cyclic dof factor 1-like isoform X1                                     |
| TCONS_00004760 | 0.737464 | -0.13566   | 0.613579   | BGIOSGA000453 | XP_006645050.1 transcription initiation factor TFIIID subunit 12                       |
| TCONS_00031450 | 0.737981 | 1.0108     | 0.749557   | BGIOSGA033268 | XP_006661953.1 UPF0496 protein 4                                                       |
| TCONS_00015477 | 0.738118 | 0.501752   | 0.776424   | BGIOSGA014067 | XP_015692357.1 PREDICTED: uncharacterized protein LOC102708331                         |
| TCONS_00001944 | 0.738367 | 0.101671   | 0.880087   | BGIOSGA010683 | XP_015697855.1 nodulation protein H-like                                               |
| TCONS_00018971 | 0.739029 | 0.997405   | 0.395202   | BGIOSGA023406 | XP_002437396.1 pentatricopeptide repeat-containing protein At2g18940, chloroplastic    |
| TCONS_00015153 | 0.739085 | 0.826778   | -0.186663  | BGIOSGA017333 | XP_006653010.1 peroxisome biogenesis protein 22-like                                   |
| TCONS_00034548 | 0.739179 | -0.903354  | -0.62827   | BGIOSGA033029 | XP_004979091.1 uncharacterized protein LOC101753208                                    |
| TCONS_00021460 | 0.739183 | 0.188977   | -1.36053   | BGIOSGA007302 | XP_006655693.1 ferredoxin--NADP reductase, leaf isozyme, chloroplastic                 |
| TCONS_00010542 | 0.739204 | 1.21443    | 2.07613    | #N/A          | #N/A                                                                                   |
| TCONS_00009809 | 0.739349 | 1.00732    | 0.759993   | BGIOSGA012363 | XP_006649878.1 PREDICTED: uncharacterized protein LOC102722940                         |
| TCONS_00024104 | 0.739586 | 0.626805   | 0.825098   | BGIOSGA007754 | XP_015695235.1 PREDICTED: uncharacterized protein LOC102709758                         |
| TCONS_00035385 | 0.739891 | #NA        | #NA        | BGIOSGA032669 | XP_003577269.1 probable LRR receptor-like serine/threonine-protein kinase At3g47570    |
| TCONS_00024753 | 0.739999 | 2.05595    | 0.440361   | BGIOSGA022232 | NP_001147550.2 alkaline alpha galactosidase 1                                          |
| TCONS_00013665 | 0.740194 | 1.17618    | 1.64006    | BGIOSGA015824 | XP_006652089.2 protein AAR2 homolog isoform X1                                         |
| TCONS_00026118 | 0.740558 | 0.627912   | 2.39471    | BGIOSGA030215 | XP_006659933.1 GTP-binding protein ERG                                                 |
| TCONS_00019267 | 0.740922 | 1.31934    | 0.685261   | BGIOSGA018081 | XP_006654383.1 PREDICTED: uncharacterized protein LOC102699685                         |
| TCONS_00009541 | 0.74115  | 0.438179   | 0.195342   | BGIOSGA026064 | XP_006650427.1 vesicle transport protein GOT1B-like isoform X2                         |
| TCONS_00023727 | 0.741396 | 1.61356    | 0.541929   | BGIOSGA006807 | XP_015694643.1 anthocyanidin 3-O-glucosyltransferase 2-like                            |
| TCONS_00011117 | 0.74155  | 0.530872   | -0.379979  | BGIOSGA019772 | XP_003557676.1 uncharacterized protein LOC100842786                                    |
| TCONS_00036742 | 0.74216  | 1.03941    | 1.03481    | BGIOSGA019367 | XP_015698464.1 pentatricopeptide repeat-containing protein At4g15720-like              |
| TCONS_00032408 | 0.74245  | 0.947708   | 0.653051   | BGIOSGA031707 | XP_024316154.1 protein NPGR2-like                                                      |
| TCONS_00014639 | 0.743048 | 1.32556    | -0.933393  | BGIOSGA031071 | XP_006652542.1 mitochondrial intermembrane space import and assembly protein 40        |
| TCONS_00036280 | 0.743048 | 0.210078   | -0.933393  | #N/A          | #N/A                                                                                   |
| TCONS_00028181 | 0.743847 | 0.696155   | 0.368728   | BGIOSGA026803 | XP_006659502.1 ATP synthase subunit d, mitochondrial                                   |
| TCONS_00008857 | 0.744018 | -0.169998  | -1.27924   | BGIOSGA005558 | XP_006647960.2 photosystem I chlorophyll a/b-binding protein 5, chloroplastic          |
| TCONS_00023357 | 0.744206 | -0.418115  | 1.06424    | BGIOSGA025399 | XP_006649646.1 superoxide dismutase [Cu-Zn] 2-like                                     |
| TCONS_00007871 | 0.744252 | 1.64698    | 0.974698   | BGIOSGA002027 | XP_006647207.2 C2 domain-containing protein At1g53590-like                             |
| TCONS_00008784 | 0.74461  | 1.89319    | 1.40677    | BGIOSGA005651 | XP_015688369.1 protein MSP1                                                            |
| TCONS_00010137 | 0.744712 | -1.73627   | -0.891635  | BGIOSGA012725 | XP_002467808.1 flavonoid 3',5'-hydroxylase 1                                           |
| TCONS_00014104 | 0.744751 | -2.37675   | -0.352647  | BGIOSGA017717 | NP_001144230.1 uncharacterized protein LOC100277095 precursor                          |
| TCONS_00008892 | 0.745049 | -0.945771  | -0.34502   | BGIOSGA005518 | XP_006647985.2 putative D-cysteine desulphydrase 1, mitochondrial                      |
| TCONS_00024401 | 0.745101 | 1.01813    | 0.80918    | BGIOSGA004480 | XP_006658171.1 PREDICTED: uncharacterized protein LOC102700724                         |
| TCONS_00001439 | 0.745248 | 0.0872095  | -1.51311   | BGIOSGA035541 | XP_006644416.2 scopoletin glucosyltransferase-like                                     |
| TCONS_00008718 | 0.745544 | 0.386348   | 0.318711   | BGIOSGA007738 | XP_015688808.1 ADP-ribosylation factor GTPase-activating protein AGD12-like isoform X1 |
| TCONS_00022391 | 0.745565 | 1.50185    | 1.87842    | BGIOSGA021069 | XP_021304348.1 berberine bridge enzyme-like 18                                         |
| TCONS_00016836 | 0.745608 | 1.93952    | 1.18213    | BGIOSGA003068 | XP_006652994.1 methylthioribose kinase 1                                               |
| TCONS_00037821 | 0.745815 | 0.20706    | -0.940244  | BGIOSGA022951 | XP_015697880.1 PREDICTED: uncharacterized protein LOC107305270 isoform X1              |
| TCONS_00010892 | 0.745994 | -0.0969136 | -0.508813  | BGIOSGA013506 | XP_006650539.1 photosystem I reaction center subunit N, chloroplastic                  |
| TCONS_00006589 | 0.74621  | 0.338103   | 1.3623     | BGIOSGA000443 | XP_006647635.2 PREDICTED: uncharacterized protein LOC102720677, partial                |
| TCONS_00014571 | 0.746257 | -0.0707059 | 0.955933   | BGIOSGA005945 | XP_015692150.1 dipthine methyltransferase homolog                                      |
| TCONS_00006799 | 0.746328 | 1.20651    | #NA        | BGIOSGA006991 | XP_004951624.1 mediator of RNA polymerase II transcription subunit 11                  |
| TCONS_00018354 | 0.746328 | 0.621549   | 0.380416   | BGIOSGA012861 | XP_006654820.1 nuclear transcription factor Y subunit B-4 isoform X1                   |
| TCONS_00019814 | 0.74645  | 0.843071   | -0.0263713 | BGIOSGA017541 | XP_006655603.1 protease Do-like 1, chloroplastic                                       |
| TCONS_00032676 | 0.746682 | -3.07124   | -0.554137  | BGIOSGA033951 | XP_015697353.1 QWRF motif-containing protein 7-like                                    |
| TCONS_00037366 | 0.746744 | 0.908045   | 0.701847   | BGIOSGA036004 | XP_006664641.1 solute carrier family 40 member 2, chloroplastic                        |
| TCONS_00006389 | 0.747051 | 0.610831   | 1.34594    | BGIOSGA008552 | XP_015689345.1 telomere length regulation protein TEL2 homolog                         |

transcriptome

|                |          |            |            |               |                                                                                      |
|----------------|----------|------------|------------|---------------|--------------------------------------------------------------------------------------|
| TCONS_00028057 | 0.747259 | 0.557902   | 0.17992    | BGIOSGA004108 | XP_006659432.1 malate dehydrogenase, chloroplastic                                   |
| TCONS_00023912 | 0.747315 | -0.264017  | 0.345561   | BGIOSGA025945 | XP_015695037.1PREDICTED: uncharacterized protein LOC102718290                        |
| TCONS_00003108 | 0.74758  | -1.44446   | -0.437428  | BGIOSGA018591 | XP_015698084.1PREDICTED: uncharacterized protein LOC102717836                        |
| TCONS_00001072 | 0.747706 | 0.14459    | 0.646138   | BGIOSGA024462 | XP_006660440.1 trafficking protein particle complex subunit 6B                       |
| TCONS_00001104 | 0.747848 | 1.24922    | 1.06446    | BGIOSGA003727 | XP_006644285.2 jmjC domain-containing protein 4                                      |
| TCONS_00019178 | 0.74815  | 0.00392458 | 0.488079   | BGIOSGA026352 | XP_006654322.1 lipase-like                                                           |
| TCONS_00024663 | 0.748251 | 1.20448    | 1.05374    | #N/A          | #N/A                                                                                 |
| TCONS_00029146 | 0.748394 | 0.949794   | 0.47815    | BGIOSGA006926 | XP_006660691.2 NF-kappa-B-activating protein                                         |
| TCONS_00018319 | 0.748537 | -0.537268  | 0.0624707  | BGIOSGA001070 | XP_022682647.1CTD small phosphatase-like protein 2-A                                 |
| TCONS_00003146 | 0.748785 | 1.45078    | 2.29851    | BGIOSGA017247 | XP_006645675.1 putative E3 ubiquitin-protein ligase LIN                              |
| TCONS_00015120 | 0.748875 | 1.01251    | 0.859116   | BGIOSGA024498 | XP_006652963.1 26S proteasome non-ATPase regulatory subunit 7 homolog A              |
| TCONS_00031623 | 0.748956 | 1.56122    | 1.16984    | BGIOSGA033437 | XP_004986091.1 sphingomyelin phosphodiesterase 4                                     |
| TCONS_00025659 | 0.748999 | 0.815394   | 0.674497   | BGIOSGA023763 | XP_006658927.1 pentatricopeptide repeat-containing protein At1g01970                 |
| TCONS_00013333 | 0.749011 | 0.458309   | -0.746194  | BGIOSGA023584 | XP_003557501.1 leucine-rich repeat extensin-like protein 6                           |
| TCONS_00007418 | 0.749042 | 0.131834   | 0.61621    | BGIOSGA007058 | XP_006646937.2 pentatricopeptide repeat-containing protein At2g35130                 |
| TCONS_00018694 | 0.749155 | 0.173576   | 0.805395   | BGIOSGA002311 | XP_006654090.1 protein NETWORKED 4B-like                                             |
| TCONS_00007240 | 0.749206 | 0.239863   | 0.492756   | BGIOSGA018462 | XP_004952164.1 transcription factor ILR3                                             |
| TCONS_00009667 | 0.749902 | 0.00214798 | 0.33819    | BGIOSGA012212 | XP_015690263.1 uncharacterized GTP-binding protein At5g64813-like isoform X2         |
| TCONS_00004968 | 0.749973 | 0.93963    | 0.0494435  | BGIOSGA007561 | XP_003567400.1 uncharacterized protein LOC100844366                                  |
| TCONS_00037860 | 0.749973 | -1.3823    | 1.37137    | #N/A          | XP_015697160.1PREDICTED: uncharacterized protein LOC107305099                        |
| TCONS_00017367 | 0.750121 | -0.846978  | 0.168833   | BGIOSGA035890 | XP_006654167.1 auxin-responsive protein IAA17                                        |
| TCONS_00006255 | 0.750717 | -0.624119  | -0.374901  | BGIOSGA024176 | XP_006647366.1 RNA polymerase II transcriptional coactivator KIWI-like               |
| TCONS_00027892 | 0.751532 | 0.423408   | -0.954455  | BGIOSGA030021 | XP_010234623.1 lipid phosphate phosphatase 2                                         |
| TCONS_00008145 | 0.751571 | 1.63205    | 0.237169   | BGIOSGA010691 | XP_015688831.1 abscisic stress-ripening protein 3-like                               |
| TCONS_00001135 | 0.752253 | 0.937212   | 1.62869    | BGIOSGA003760 | XP_014754301.1 uncharacterized protein LOC100828486                                  |
| TCONS_00006910 | 0.752253 | 0.937212   | 0.043728   | BGIOSGA031878 | XP_004977682.2 BTB/POZ and MATH domain-containing protein 3                          |
| TCONS_00012288 | 0.752364 | 0.179304   | 0.381035   | BGIOSGA000106 | XP_006650094.1 mitochondrial fission 1 protein A-like                                |
| TCONS_00025298 | 0.75244  | 1.84667    | 1.08438    | BGIOSGA023611 | XP_006657811.1 probable proteasome inhibitor                                         |
| TCONS_00029840 | 0.752446 | -0.627252  | -0.925651  | BGIOSGA037843 | XP_006660542.2 putative glucose-6-phosphate 1-epimerase                              |
| TCONS_00005068 | 0.75247  | 1.23643    | 0.892798   | BGIOSGA019060 | XP_004971213.1 mediator of DNA damage checkpoint protein 1                           |
| TCONS_00022464 | 0.7526   | -1.38509   | -0.957149  | BGIOSGA019146 | XP_021314222.1 uncharacterized protein LOC110434461                                  |
| TCONS_00008570 | 0.752797 | 0.902132   | 0.104517   | BGIOSGA018842 | XP_022683328.1 dof zinc finger protein 2 isoform X2                                  |
| TCONS_00003252 | 0.752939 | #N/A       | -0.958007  | BGIOSGA037535 | XP_002457590.1 rapid alkalization factor                                             |
| TCONS_00016326 | 0.753516 | 1.04727    | 0.410324   | BGIOSGA015555 | NP_001168161.1 required to maintain repression 2                                     |
| TCONS_00033596 | 0.753544 | 1.71359    | 2.60287    | BGIOSGA005513 | XP_006663128.1 heat shock cognate 70 kDa protein 2                                   |
| TCONS_00004908 | 0.753653 | 0.422607   | 1.1227     | BGIOSGA000130 | XP_006645183.1 DNA repair protein recA homolog 3, mitochondrial                      |
| TCONS_00008357 | 0.753779 | 0.552775   | 1.27018    | BGIOSGA014796 | XP_004953057.1 Ia protein 1                                                          |
| TCONS_00029335 | 0.753788 | 0.0648527  | 0.16372    | BGIOSGA029085 | XP_015696499.1 probable E3 ubiquitin-protein ligase ARI5                             |
| TCONS_00013256 | 0.754343 | 0.871512   | 1.48428    | BGIOSGA004935 | XP_003558631.1 pentatricopeptide repeat-containing protein At2g22070                 |
| TCONS_00036967 | 0.754443 | 1.10574    | 0.667482   | BGIOSGA010192 | NP_001152192.1 oxygen-independent coproporphyrinogen III oxidase-like protein sl1917 |
| TCONS_00005216 | 0.754812 | -1.97244   | 1.15271    | BGIOSGA007328 | XP_006648201.2 rhodanese-like domain-containing protein 19, mitochondrial            |
| TCONS_00036176 | 0.755914 | 1.20282    | 0.83132    | BGIOSGA037533 | XP_004962824.1 uncharacterized protein LOC101759704                                  |
| TCONS_00035228 | 0.756001 | 0.409136   | 0.39119    | BGIOSGA036145 | XP_006663065.1 phosphoserine phosphatase, chloroplastic                              |
| TCONS_00008178 | 0.756242 | 0.640232   | 0.438254   | BGIOSGA015055 | XP_015688806.1 mitogen-activated protein kinase kinase kinase YODA-like isoform X2   |
| TCONS_00011080 | 0.756257 | 0.729685   | 0.594645   | BGIOSGA013680 | XP_006650685.1 endoplasmic reticulum-Golgi intermediate compartment protein 3        |
| TCONS_00007262 | 0.756418 | 1.25338    | 1.1784     | BGIOSGA007220 | XP_006646806.1 eukaryotic translation initiation factor 3 subunit J-A-like           |
| TCONS_00032423 | 0.757456 | 0.379705   | 0.143138   | BGIOSGA010174 | XP_003574056.1 vacuolar protein sorting-associated protein 2 homolog 3               |
| TCONS_00025680 | 0.757541 | 0.648801   | 0.404814   | BGIOSGA033808 | XP_006658086.2 serine/threonine-protein kinase CDL1                                  |
| TCONS_00028443 | 0.757605 | 0.379186   | 0.00178161 | BGIOSGA005460 | XP_006660366.1 NEP1-interacting protein-like 1                                       |
| TCONS_00011028 | 0.75821  | 1.3138     | 1.56021    | BGIOSGA013630 | XP_006650650.1 proteasome assembly chaperone 2                                       |
| TCONS_00023593 | 0.758456 | 0.185082   | 0.628694   | BGIOSGA025615 | XP_006657661.1 phosphomannomutase/phosphoglucomutase isoform X1                      |

## transcriptome

|                |          |            |             |               |                                                                                              |
|----------------|----------|------------|-------------|---------------|----------------------------------------------------------------------------------------------|
| TCONS_00001424 | 0.758537 | 0.569687   | 0.878603    | BGIOSGA019202 | XP_006644407.1 protein INVOLVED IN DE NOVO 2-like                                            |
| TCONS_00011013 | 0.7589   | 0.216712   | -0.279163   | BGIOSGA035627 | XP_004981660.1probable N-acetyltransferase HLS1-like                                         |
| TCONS_00003821 | 0.759171 | 0.514604   | 0.964774    | BGIOSGA014252 | NP_001142674.1uncharacterized protein LOC100274969                                           |
| TCONS_00021157 | 0.759178 | 2.26664    | -0.00482983 | BGIOSGA023379 | XP_006656311.1PREDICTED: uncharacterized protein LOC102717163                                |
| TCONS_00000398 | 0.760305 | 1.41378    | 1.02331     | #N/A          | #N/A                                                                                         |
| TCONS_00009394 | 0.760555 | 0.253096   | -0.275599   | BGIOSGA011944 | XP_006649465.1 ribulose-phosphate 3-epimerase, chloroplastic                                 |
| TCONS_00008103 | 0.760599 | 0.120962   | 1.00409     | BGIOSGA033288 | XP_002453922.1heat stress transcription factor A-3                                           |
| TCONS_00024658 | 0.761338 | 0.596013   | -0.906831   | BGIOSGA016111 | XP_003557503.1probable ribose-5-phosphate isomerase 3, chloroplastic                         |
| TCONS_00007303 | 0.761456 | 0.318165   | 0.925923    | BGIOSGA007181 | XP_006648287.1 cyclin-T1-1-like                                                              |
| TCONS_00037164 | 0.761622 | 1.51178    | 0.827318    | #N/A          | #N/A                                                                                         |
| TCONS_00008354 | 0.761782 | 1.08751    | 0.169075    | BGIOSGA006073 | XP_002454154.1outer envelope pore protein 37, chloroplastic                                  |
| TCONS_00035558 | 0.761922 | 1.1895     | 1.0972      | BGIOSGA034511 | XP_010238795.1E3 ubiquitin-protein ligase RNF181                                             |
| TCONS_00033644 | 0.762068 | 1.18932    | -0.0880862  | BGIOSGA035427 | NP_001147401.1tubulin alpha-6 chain                                                          |
| TCONS_00021009 | 0.762311 | 1.00573    | 0.747392    | BGIOSGA016957 | XP_006647038.1 26S protease regulatory subunit S10B homolog B                                |
| TCONS_00008763 | 0.762353 | 1.41138    | 2.01811     | BGIOSGA027747 | XP_006649020.1 probable calcium-binding protein CML20                                        |
| TCONS_00031832 | 0.762491 | 1.06329    | 0.825109    | BGIOSGA014570 | XP_022685460.1uncharacterized protein LOC101771470, partial                                  |
| TCONS_00011118 | 0.762761 | -1.7184    | -1.30486    | BGIOSGA026653 | XP_002466308.2uncharacterized protein LOC8081268                                             |
| TCONS_00020821 | 0.763177 | 1.58333    | 1.07708     | BGIOSGA023031 | XP_015694351.1 putative E3 ubiquitin-protein ligase UBR7                                     |
| TCONS_00036814 | 0.763447 | 0.0583291  | -0.988396   | BGIOSGA036500 | XP_006663877.1 psbP domain-containing protein 4, chloroplastic                               |
| TCONS_00000500 | 0.76352  | -0.812419  | -1.98485    | BGIOSGA021615 | NP_001105641.1aquaporin TIP4-4                                                               |
| TCONS_00005451 | 0.76352  | -0.0754538 | 1.26307     | BGIOSGA037257 | XP_006646894.1 ribulose bisphosphate carboxylase small chain clone 512-like                  |
| TCONS_00014293 | 0.763873 | 1.35708    | 1.01426     | BGIOSGA016448 | XP_006652306.1 psbP domain-containing protein 2, chloroplastic                               |
| TCONS_00007205 | 0.764099 | -2.39808   | -1.98631    | BGIOSGA005298 | XP_008645149.1RING-H2 finger protein ATL79                                                   |
| TCONS_00027353 | 0.764425 | -0.0359122 | 0.375435    | #N/A          | #N/A                                                                                         |
| TCONS_00027325 | 0.764979 | 2.02503    | 0.485352    | BGIOSGA020655 | XP_015696206.1 external alternative NAD(P)H-ubiquinone oxidoreductase B2, mitochondrial-like |
| TCONS_00022883 | 0.765215 | 0.96751    | 1.86044     | BGIOSGA017152 | XP_012702682.2putative disease resistance protein At3g14460                                  |
| TCONS_00008249 | 0.765408 | 1.44161    | 1.06928     | BGIOSGA005673 | XP_002454066.1protein TsetseEP                                                               |
| TCONS_00029062 | 0.76548  | 0.120162   | -0.143694   | BGIOSGA030808 | XP_015696359.1 glutamate receptor 2.9-like                                                   |
| TCONS_00034286 | 0.765515 | 0.867099   | 1.226       | BGIOSGA034508 | XP_006664328.1 crocetin glucosyltransferase, chloroplastic-like                              |
| TCONS_00035955 | 0.765587 | 1.30052    | 0.331863    | BGIOSGA007026 | XP_004962556.1E3 ubiquitin-protein ligase ATL6                                               |
| TCONS_00013354 | 0.765587 | 1.23235    | -1.31199    | BGIOSGA009629 | NP_001307021.1uncharacterized LOC100273825                                                   |
| TCONS_00011217 | 0.765735 | 1.20307    | -0.261048   | BGIOSGA030651 | XP_006651955.1 SCAR-like protein 1 isoform X1                                                |
| TCONS_00018626 | 0.76596  | 1.60149    | 1.17205     | BGIOSGA018808 | XP_006654042.1 T-complex protein 1 subunit zeta 1                                            |
| TCONS_00006840 | 0.765962 | 0.582295   | 0.856267    | BGIOSGA000228 | XP_015689554.1 probable histidine kinase 6                                                   |
| TCONS_00009417 | 0.766214 | 1.2315     | 1.11825     | BGIOSGA011970 | XP_015690254.1 mitochondrial ubiquitin ligase activator of NFKB 1                            |
| TCONS_00034139 | 0.766256 | 0.41741    | 0.760321    | BGIOSGA018329 | XP_006665213.1 double-stranded RNA-binding protein 7-like                                    |
| TCONS_00016984 | 0.766486 | 1.10091    | 1.71205     | BGIOSGA019032 | XP_006654903.1 E3 ubiquitin-protein ligase RING1-like                                        |
| TCONS_00010753 | 0.766926 | 1.68587    | 1.707       | BGIOSGA031311 | XP_002466626.1uncharacterized protein LOC8062954                                             |
| TCONS_00015354 | 0.766998 | 0.338007   | -2.63447    | BGIOSGA015620 | XP_024311606.1uncharacterized protein LOC100820859                                           |
| TCONS_00022905 | 0.767266 | 1.26094    | -2.57925    | BGIOSGA004173 | XP_006656487.1 ras-related protein RABA3-like                                                |
| TCONS_00024105 | 0.767394 | 0.791561   | 0.12969     | BGIOSGA021298 | XP_015695289.1 peroxisomal (S)-2-hydroxy-acid oxidase GLO4-like                              |
| TCONS_00007624 | 0.767453 | 4.35606    | -3.16141    | BGIOSGA033699 | XP_015688519.1 cytochrome P450 711A1-like                                                    |
| TCONS_00001437 | 0.767459 | 2.1827     | 0.590183    | BGIOSGA010658 | XP_006644414.2 myb-related protein 340-like                                                  |
| TCONS_00034948 | 0.767664 | -0.474358  | -0.250908   | BGIOSGA022712 | XP_006660464.1 RPM1-interacting protein 4-like                                               |
| TCONS_00006702 | 0.768147 | -0.236754  | 0.551641    | BGIOSGA008869 | XP_002454434.1uncharacterized protein LOC8073172                                             |
| TCONS_00028464 | 0.768222 | 0.753709   | 0.120573    | BGIOSGA025459 | XP_006659694.1 vesicle-associated membrane protein 727                                       |
| TCONS_00007690 | 0.768223 | 0.67133    | 1.28248     | BGIOSGA006799 | XP_021308676.1defective in cullin neddylation protein 1 isoform X3                           |
| TCONS_00003579 | 0.768496 | 3.11024    | -0.188018   | BGIOSGA000766 | XP_004968765.1probable glutathione S-transferase GSTF1                                       |
| TCONS_00026301 | 0.768784 | 1.55025    | 0.00190107  | #N/A          | #N/A                                                                                         |
| TCONS_00014940 | 0.768832 | #N/A       | 0.586744    | BGIOSGA002233 | XP_002447096.2myristoylated alanine-rich C-kinase substrate                                  |
| TCONS_00003150 | 0.76901  | 1.45351    | 1.00591     | BGIOSGA013743 | XP_006656446.1 60S acidic ribosomal protein P3                                               |
| TCONS_00014818 | 0.769018 | 1.47491    | 0.685815    | BGIOSGA031846 | XP_006652695.1 expansin-A10                                                                  |
| TCONS_00019617 | 0.769044 | 1.37952    | 1.68923     | BGIOSGA017740 | XP_006654632.1 carnosine N-methyltransferase-like isoform X1                                 |
| TCONS_00025503 | 0.76924  | 0.817874   | 1.32269     | BGIOSGA019138 | XP_002457708.1peroxidase 5                                                                   |
| TCONS_00031529 | 0.769283 | -3.40457   | -1.99934    | BGIOSGA004738 | XP_004983834.1transcription repressor OFP8                                                   |
| TCONS_00019526 | 0.769662 | 0.640019   | 1.21356     | BGIOSGA031326 | XP_006654558.1 protein KRTCAP2 homolog                                                       |

## transcriptome

|                |          |            |            |               |                                                                                                                           |
|----------------|----------|------------|------------|---------------|---------------------------------------------------------------------------------------------------------------------------|
| TCONS_00017882 | 0.769728 | 0.710341   | 1.45898    | BGIOSGA010397 | XP_006655359.2 G-box-binding factor 4-like                                                                                |
| TCONS_00028674 | 0.769742 | -0.308454  | -0.623559  | BGIOSGA030526 | XP_006660490.1 rhodanese-like domain-containing protein 9, chloroplastic                                                  |
| TCONS_00010634 | 0.770023 | -0.183116  | 0.2212     | BGIOSGA013256 | XP_006655024.2 PREDICTED: uncharacterized protein LOC102699508                                                            |
| TCONS_00010264 | 0.770299 | 0.339425   | 0.525986   | BGIOSGA005822 | XP_002467721.1 uncharacterized protein LOC8080433                                                                         |
| TCONS_00004186 | 0.770525 | 0.642023   | 1.3541     | BGIOSGA001012 | XP_015688245.1 glycosylphosphatidylinositol anchor attachment 1 protein isoform X1                                        |
| TCONS_00000780 | 0.770672 | 0.9156     | 1.45662    | BGIOSGA003376 | XP_003567617.1 caffeoylshikimate esterase                                                                                 |
| TCONS_00018969 | 0.771437 | 0.365295   | 0.695726   | BGIOSGA013855 | XP_006654297.2 bifunctional epoxide hydrolase 2-like                                                                      |
| TCONS_00011881 | 0.771515 | 0.737703   | 0.354713   | BGIOSGA032570 | XP_006649722.1 26S proteasome non-ATPase regulatory subunit 4 homolog                                                     |
| TCONS_00034361 | 0.771575 | 2.21702    | 1.57991    | BGIOSGA034446 | XP_006663236.1 PREDICTED: uncharacterized protein LOC102714508                                                            |
| TCONS_00027337 | 0.771728 | 0.914267   | 0.579526   | BGIOSGA005913 | XP_006659824.1 putative lipase YOR059C                                                                                    |
| TCONS_00036669 | 0.771812 | 0.292673   | 1.74924    | BGIOSGA036642 | XP_022684373.1 meiotic recombination protein DMC1 homolog isoform X1                                                      |
| TCONS_00031694 | 0.771846 | 1.00469    | 1.50678    | BGIOSGA037906 | XP_006662115.2 ATP-dependent Clp protease proteolytic subunit 4, chloroplastic                                            |
| TCONS_00016470 | 0.771894 | -0.729798  | -2.00585   | BGIOSGA004933 | XP_006653701.1 protein DMR6-LIKE OXYGENASE 1-like                                                                         |
| TCONS_00008669 | 0.771954 | -0.0156279 | -0.0991055 | BGIOSGA026130 | XP_003570207.2 uncharacterized protein LOC100827381                                                                       |
| TCONS_00003409 | 0.771993 | 0.872113   | 0.382949   | BGIOSGA002734 | XP_006644115.1 PREDICTED: uncharacterized protein LOC102703625                                                            |
| TCONS_00032994 | 0.772051 | 2.24059    | 1.81394    | BGIOSGA009203 | XP_006663223.1 mRNA-decapping enzyme-like protein                                                                         |
| TCONS_00017069 | 0.772101 | -0.528306  | -0.860259  | #N/A          | #N/A                                                                                                                      |
| TCONS_00008810 | 0.772217 | -0.600922  | 0.578313   | BGIOSGA012641 | XP_006647893.1 PREDICTED: uncharacterized protein At5g39865-like                                                          |
| TCONS_00017775 | 0.772537 | -0.194555  | 0.18159    | BGIOSGA004111 | XP_006654372.1 GDSL esterase/lipase At1g54790 isoform X1                                                                  |
| TCONS_00009822 | 0.772706 | 1.14692    | 1.67021    | BGIOSGA023663 | XP_006649892.1 arogenate dehydratase/prephenate dehydratase 2, chloroplastic-like                                         |
| TCONS_00016401 | 0.772822 | 1.42746    | 0.354422   | BGIOSGA022423 | XP_010933314.1 cactin                                                                                                     |
| TCONS_00027193 | 0.772836 | -0.631448  | 0.354387   | BGIOSGA006095 | XP_014756554.1 PI-PLC X domain-containing protein At5g67130                                                               |
| TCONS_00021109 | 0.773076 | 1.31311    | 0.254257   | BGIOSGA000159 | XP_006648392.1 probable glycosyltransferase At5g03795                                                                     |
| TCONS_00002942 | 0.773187 | 1.6349     | 2.4828     | BGIOSGA013141 | XP_021316975.1 ankryrin repeat, PH and SEC7 domain containing protein secG                                                |
| TCONS_00000327 | 0.773896 | 0.267684   | 1.05958    | BGIOSGA033436 | XP_004968446.1 talkane hydroxylase MAH1                                                                                   |
| TCONS_00002044 | 0.773994 | 0.534594   | -0.315402  | BGIOSGA008868 | XP_004304633.1 ADP-ribosylation factor 1 isoform X1                                                                       |
| TCONS_00018499 | 0.774228 | 0.704671   | 1.1583     | BGIOSGA018934 | XP_006653974.1 RNA-binding protein 34                                                                                     |
| TCONS_00028624 | 0.774297 | -0.230321  | -0.52637   | BGIOSGA029305 | XP_006660467.1 PREDICTED: uncharacterized protein LOC102713845                                                            |
| TCONS_00033920 | 0.77444  | #N/A       | -1.69022   | BGIOSGA004808 | XP_015697928.1 putative laccase-19                                                                                        |
| TCONS_00016695 | 0.774547 | 0.825833   | 0.703794   | BGIOSGA014268 | XP_006652886.2 MICOS complex subunit MIC60                                                                                |
| TCONS_00000503 | 0.775013 | 1.31231    | 1.35088    | BGIOSGA003076 | XP_006643955.1 VHS domain-containing protein At3g16270                                                                    |
| TCONS_00036803 | 0.775013 | 2.23207    | 2.30837    | BGIOSGA026941 | XP_002442933.1 dihydrolypolylysine-residue acetyltransferase component 5 of pyruvate dehydrogenase complex, chloroplastic |
| TCONS_00013390 | 0.775128 | 1.74334    | 2.14143    | BGIOSGA009594 | XP_006651940.1 dentin sialophosphoprotein                                                                                 |
| TCONS_00017674 | 0.775311 | 1.6753     | 0.94918    | BGIOSGA024304 | XP_015693240.1 protein QUIRKY-like                                                                                        |
| TCONS_00007366 | 0.775349 | 0.26586    | 1.08995    | BGIOSGA007102 | XP_022684508.1 tyrosine-sulfated glycopeptide receptor 1-like                                                             |
| TCONS_00014735 | 0.777345 | 2.19413    | 0.7627     | BGIOSGA003074 | XP_015691897.1 probable aquaporin PIP1-2 isoform X1                                                                       |
| TCONS_00016547 | 0.778033 | -0.205886  | 0.737955   | BGIOSGA014420 | XP_006653734.1 PREDICTED: uncharacterized protein LOC102705815                                                            |
| TCONS_00015497 | 0.778036 | #N/A       | -1.04105   | BGIOSGA008776 | XP_006652133.1 E3 ubiquitin-protein ligase RHA2A-like                                                                     |
| TCONS_00009932 | 0.778087 | -0.922979  | -1.26907   | BGIOSGA006435 | XP_009113385.1 NHL repeat-containing protein 2 isoform X2                                                                 |
| TCONS_00011533 | 0.77876  | -0.188997  | 0.869373   | BGIOSGA011194 | XP_006651018.2 protein CHAPERONE-LIKE PROTEIN OF POR1, chloroplastic                                                      |
| TCONS_00006118 | 0.7789   | 0.668084   | 0.771887   | BGIOSGA028788 | XP_024316982.1 exocyst complex component EXO70B1                                                                          |
| TCONS_00028423 | 0.779618 | -4.78535   | -1.63081   | BGIOSGA028566 | XP_015695690.1 BAG family molecular chaperone regulator 1                                                                 |
| TCONS_00019016 | 0.780512 | 0.740439   | 0.890129   | BGIOSGA005123 | XP_006654238.1 cytochrome c1-2, heme protein, mitochondrial-like isoform X2                                               |
| TCONS_00033630 | 0.780824 | 0.63516    | 0.437156   | BGIOSGA033267 | XP_015697688.1 transmembrane protein 87B                                                                                  |
| TCONS_00036945 | 0.780956 | 0.168255   | 1.01224    | BGIOSGA018541 | XP_015688074.1 chaperone protein dnaJ 50                                                                                  |
| TCONS_00001858 | 0.781144 | 0.279255   | 0.0674709  | BGIOSGA007615 | XP_015691811.1 soluble scavenger receptor cysteine-rich domain-containing protein SSC5D                                   |
| TCONS_00009256 | 0.781291 | 1.0135     | 1.58543    | BGIOSGA011786 | XP_015689755.1 ATP phosphoribosyltransferase, chloroplastic                                                               |
| TCONS_00025936 | 0.781297 | 0.34599    | 0.628356   | BGIOSGA027632 | XP_004972813.1 vesicle-associated protein 1-3                                                                             |
| TCONS_00019176 | 0.781804 | 0.523798   | 1.17501    | BGIOSGA000165 | XP_006655251.1 succinate dehydrogenase subunit 4, mitochondrial-like isoform X1                                           |
| TCONS_00011528 | 0.78215  | 0.964386   | 0.195699   | BGIOSGA011502 | XP_006649352.1 glutathione S-transferase F11-like                                                                         |
| TCONS_00023446 | 0.782771 | 0.419089   | 1.06584    | BGIOSGA025477 | XP_015694839.1 BTB/POZ domain-containing protein At4g08455                                                                |
| TCONS_00000182 | 0.782827 | 0.635386   | 1.22319    | BGIOSGA002755 | XP_006643738.1 EKC/KEOPS complex subunit TPRKB                                                                            |
| TCONS_00001155 | 0.783223 | 0.174551   | -0.0117162 | BGIOSGA037078 | NP_001151680.1 protein transport protein Sec61 beta subunit                                                               |

## transcriptome

|                |          |            |            |               |                                                                                        |
|----------------|----------|------------|------------|---------------|----------------------------------------------------------------------------------------|
| TCONS_00031233 | 0.783315 | -0.344245  | -0.338271  | BGIOSGA033052 | XP_006661803.1 ubiquitin-conjugating enzyme E2 4                                       |
| TCONS_00002340 | 0.783493 | -1.47251   | -1.30413   | BGIOSGA014722 | XP_006645170.1 beta-glucosidase 4                                                      |
| TCONS_00019422 | 0.783654 | 0.0698101  | 0.884447   | BGIOSGA004801 | XP_006654501.1 delta-1-pyrroline-5-carboxylate synthase                                |
| TCONS_00013554 | 0.783675 | 1.27903    | 1.37388    | BGIOSGA018233 | XP_006650912.1 PREDICTED: uncharacterized protein LOC102718067                         |
| TCONS_00031407 | 0.783707 | 0.991233   | 1.91934    | BGIOSGA005008 | XP_003574136.1E3 ubiquitin-protein ligase AIRP2 isoform X1                             |
| TCONS_00022937 | 0.784011 | 0.640858   | 0.00325955 | BGIOSGA021611 | XP_021305305.1ATP-dependent zinc metalloprotease FTSH 1, chloroplastic                 |
| TCONS_00018859 | 0.784852 | 0.539993   | 0.798308   | BGIOSGA000824 | XP_006664910.1 coiled-coil domain-containing protein 25                                |
| TCONS_00025871 | 0.785093 | 0.494079   | 1.665      | BGIOSGA033388 | XP_006659800.2 plant cysteine oxidase 3-like                                           |
| TCONS_00013402 | 0.786191 | 0.326556   | -0.166966  | BGIOSGA002607 | XP_010229598.3NAC domain-containing protein 67                                         |
| TCONS_00033084 | 0.786496 | 0.673719   | -0.0909943 | BGIOSGA023525 | XP_006662783.1 nifU-like protein 1, chloroplastic                                      |
| TCONS_00001505 | 0.786513 | 0.0758004  | 0.564497   | BGIOSGA002105 | XP_006644467.1 V-type proton ATPase subunit E-like                                     |
| TCONS_00011586 | 0.786742 | 1.50125    | 1.56721    | BGIOSGA021125 | XP_015690915.1 RNA-binding protein 39-like isoform X2                                  |
| TCONS_00010106 | 0.786946 | 0.111      | 0.368562   | BGIOSGA026262 | XP_006650101.1 putative MO25-like protein At4g17270                                    |
| TCONS_00028047 | 0.787197 | -1.23382   | -1.92557   | BGIOSGA021491 | XP_015695938.1 protein CURVATURE THYLAKOID 1A, chloroplastic-like                      |
| TCONS_00019829 | 0.787804 | 0.393957   | 0.833788   | BGIOSGA029488 | XP_004953250.1 uncharacterized protein LOC101783675                                    |
| TCONS_00025498 | 0.788188 | -2.06273   | 0.330267   | BGIOSGA012881 | XP_006658777.1 protein LONGIFOLIA 2-like                                               |
| TCONS_00030270 | 0.788538 | -0.713232  | 0.190704   | BGIOSGA026689 | XP_006660776.1 PREDICTED: uncharacterized protein LOC102712842                         |
| TCONS_00021890 | 0.788542 | 0.68435    | 0.840398   | BGIOSGA025748 | XP_004966817.1 transcription termination factor MTERF2, chloroplastic                  |
| TCONS_00006997 | 0.789153 | 2.20248    | 0.825574   | BGIOSGA002960 | XP_015689674.1 protein CYPRO4-like                                                     |
| TCONS_00007090 | 0.789629 | 0.449853   | 1.0472     | BGIOSGA009270 | XP_015689525.1 F-box protein PP2-B1-like                                               |
| TCONS_00021290 | 0.78978  | 1.26757    | 1.19041    | BGIOSGA023520 | XP_006656412.1 cytoplasmic 60S subunit biogenesis factor REI1 homolog 1                |
| TCONS_00018245 | 0.789966 | 1.72591    | 2.47225    | BGIOSGA009184 | XP_015693381.1 FHA domain-containing protein DDL                                       |
| TCONS_00001528 | 0.790145 | 0.734404   | 0.313831   | BGIOSGA017549 | XP_006644478.1 PREDICTED: uncharacterized protein LOC102719055                         |
| TCONS_00021576 | 0.790257 | 0.208304   | 0.947161   | BGIOSGA021969 | XP_006655772.2 tRNA wybutosine-synthesizing protein 4 isoform X1                       |
| TCONS_00008659 | 0.790273 | 0.698769   | 0.667586   | BGIOSGA021239 | XP_006647764.1 U-box domain-containing protein 5-like                                  |
| TCONS_00023151 | 0.790314 | 0.352608   | 0.604228   | BGIOSGA025188 | XP_006657464.1 PREDICTED: uncharacterized protein LOC102712645                         |
| TCONS_00012973 | 0.790678 | -0.713987  | 1.02669    | #N/A          | #N/A                                                                                   |
| TCONS_00026200 | 0.790759 | -0.0994422 | -0.846077  | BGIOSGA028270 | XP_006659239.2 NADPH-cytochrome P450 reductase-like                                    |
| TCONS_00003014 | 0.790989 | -4.34437   | -1.82483   | BGIOSGA011837 | XP_002455008.1NDR1/HIN1-like protein 6                                                 |
| TCONS_00033518 | 0.791043 | -2.05178   | 0.157552   | BGIOSGA025077 | XP_015697765.1 11-beta-hydroxysteroid dehydrogenase 1B-like                            |
| TCONS_00010071 | 0.791752 | -0.917543  | -0.122218  | BGIOSGA000386 | XP_008660155.1 inactive beta-amylase 9                                                 |
| TCONS_00004847 | 0.792006 | 0.12121    | -0.497549  | BGIOSGA000372 | NP_001338755.1 uncharacterized protein LOC100280094                                    |
| TCONS_00004817 | 0.792178 | 0.89284    | 0.743424   | BGIOSGA000399 | XP_004970761.1 SUN domain-containing protein 4                                         |
| TCONS_00001517 | 0.792487 | -0.0932798 | 0.41586    | BGIOSGA004148 | XP_002456086.1 uncharacterized protein LOC8060135                                      |
| TCONS_00031678 | 0.792809 | 1.33516    | 0.718129   | BGIOSGA008261 | XP_006662102.1 cinnamoyl-CoA reductase 1-like                                          |
| TCONS_00005354 | 0.793259 | -0.362111  | 0.939592   | BGIOSGA007465 | XP_006646835.1 probable ATP synthase 24 kDa subunit, mitochondrial                     |
| TCONS_00004675 | 0.793435 | 1.6135     | 0.583849   | BGIOSGA005701 | XP_006644967.1 nuclear transcription factor Y subunit B-2                              |
| TCONS_00017204 | 0.793468 | 1.52643    | 0.90255    | BGIOSGA019247 | XP_006654089.1 PREDICTED: uncharacterized protein LOC102705342                         |
| TCONS_00023940 | 0.793851 | -0.441924  | 0.547019   | BGIOSGA029832 | XP_006657863.1 zinc finger AN1 and C2H2 domain-containing stress-associated protein 16 |
| TCONS_00021490 | 0.793958 | 1.35172    | 1.47324    | BGIOSGA000430 | XP_006656571.2 superoxide dismutase [Fe] 1, chloroplastic-like                         |
| TCONS_00020118 | 0.794594 | -3.2152    | 0.508776   | BGIOSGA013343 | XP_015694380.1 GDSL esterase/lipase APG                                                |
| TCONS_00001074 | 0.794717 | 0.319915   | 0.6926     | BGIOSGA003691 | XP_006644249.1 protein usf                                                             |
| TCONS_00028067 | 0.794809 | 0.843424   | 1.21606    | BGIOSGA015096 | XP_004973533.1 zinc-finger homeodomain protein 10                                      |
| TCONS_00003619 | 0.794944 | -0.934314  | 1.90786    | BGIOSGA001263 | XP_015694204.1 cytochrome P450 734A6                                                   |
| TCONS_00028652 | 0.795713 | 0.74751    | 0.0617593  | BGIOSGA036735 | XP_010237994.1 vacuolar protein sorting-associated protein 32 homolog 2                |
| TCONS_00036901 | 0.795815 | -0.41934   | -0.159544  | BGIOSGA014659 | XP_015697415.1 LIM domain-containing protein PLIM2b-like                               |
| TCONS_00032853 | 0.796449 | 0.378032   | 0.326588   | BGIOSGA034671 | XP_006662663.2 PREDICTED: uncharacterized protein LOC102720274 isoform X1              |
| TCONS_00005863 | 0.796565 | 1.02439    | 0.862131   | BGIOSGA007996 | XP_015689034.1 ribosomal RNA small subunit methyltransferase nep-1                     |
| TCONS_00021605 | 0.797112 | -0.0063468 | -0.819476  | BGIOSGA021924 | XP_015693876.1 PREDICTED: uncharacterized protein LOC102717905, partial                |
| TCONS_00015824 | 0.7974   | 2.01528    | 0.937359   | BGIOSGA025454 | XP_006652238.1 calnexin homolog                                                        |
| TCONS_00002395 | 0.79813  | 0.542939   | -0.229987  | BGIOSGA005031 | NP_001136449.1 Thioredoxin F-type chloroplastic                                        |
| TCONS_00034982 | 0.798283 | 0.321387   | 1.31489    | BGIOSGA033869 | XP_015697770.1 ATP-dependent DNA helicase At3g02060, chloroplastic                     |
| TCONS_00014225 | 0.798317 | 0.618415   | -0.549217  | BGIOSGA004097 | XP_002446447.1 protein FAM210B isoform X2                                              |
| TCONS_00023273 | 0.798331 | 1.68214    | 2.49552    | BGIOSGA019907 | XP_003557437.1 tRNA ligase 1                                                           |



## transcriptome

|                |          |            |            |               |                                                                                                       |
|----------------|----------|------------|------------|---------------|-------------------------------------------------------------------------------------------------------|
| TCONS_00010723 | 0.798609 | 0.44949    | 1.44677    | BGIOSGA013347 | XP_006650417.1 uncharacterized tRNA/rRNA methyltransferase YsgA                                       |
| TCONS_00031876 | 0.798784 | 0.0209929  | -0.75564   | BGIOSGA032257 | XP_021901068.1 uncharacterized protein LOC110816989                                                   |
| TCONS_00004431 | 0.798944 | 0.59619    | 0.273243   | BGIOSGA015194 | XP_006644736.1 phosphatidate cytidylyltransferase 1-like                                              |
| TCONS_00021582 | 0.799151 | -0.712269  | -1.05256   | BGIOSGA006914 | XP_015694392.1 uncharacterized RNA-binding protein C17H9.04c-like isoform X1                          |
| TCONS_00030085 | 0.799527 | 0.837808   | 1.24606    | #N/A          | #N/A                                                                                                  |
| TCONS_00011713 | 0.799586 | 0.570417   | 0.991129   | BGIOSGA011297 | XP_006649539.1 5'-3' exonuclease XP_004972723.1 phenolic glucoside                                    |
| TCONS_00026002 | 0.799844 | -0.15339   | -0.37208   | BGIOSGA026166 | malonyltransferase 1 XP_015688290.1 random slug protein 5-like isoform X3                             |
| TCONS_00003274 | 0.799875 | 0.471974   | 0.584271   | BGIOSGA005610 | XP_004968878.1 uncharacterized protein LOC101786743                                                   |
| TCONS_00003739 | 0.800005 | -1.23264   | 0.570332   | BGIOSGA008526 |                                                                                                       |
| TCONS_00002356 | 0.80004  | 0.510287   | 0.59665    | BGIOSGA021712 | XP_006646573.2 putative polyketide hydroxylase XP_004982006.1 zinc finger protein CONSTANS-LIKE 16    |
| TCONS_00010807 | 0.800067 | -0.996914  | -0.575     | BGIOSGA014097 | XP_015688327.1 protein BRASSINOSTEROID INSENSITIVE 1-like                                             |
| TCONS_00003378 | 0.800132 | 0.863808   | 0.493329   | BGIOSGA024808 |                                                                                                       |
| TCONS_00022946 | 0.800319 | 1.18997    | 0.938774   | BGIOSGA007885 | XP_006657366.1 callose synthase 3-like XP_015696764.1 PREDICTED: uncharacterized protein LOC102708648 |
| TCONS_00030408 | 0.800448 | -0.724305  | -0.277545  | BGIOSGA029393 | XP_006651861.1 NADH-ubiquinone oxidoreductase subunit 8-like                                          |
| TCONS_00013251 | 0.80071  | 0.399328   | 0.173267   | BGIOSGA009737 | XP_006654740.1 DNA-binding protein DDB_G0278111                                                       |
| TCONS_00019730 | 0.800996 | -0.0735829 | 0.00276887 | BGIOSGA037952 | XP_004982381.1 probable prefoldin subunit 4                                                           |
| TCONS_00012757 | 0.801197 | 0.928158   | 0.670517   | BGIOSGA010205 | XP_015694818.1 5'-nucleotidase SurE                                                                   |
| TCONS_00024740 | 0.801456 | -0.330591  | 0.684226   | BGIOSGA024636 | XP_006645047.1 protein BUD31 homolog 1                                                                |
| TCONS_00016732 | 0.801479 | 0.390876   | 1.48786    | BGIOSGA036996 | XP_006652671.1 xyloglucan galactosyltransferase KATAMARI1 homolog                                     |
| TCONS_00014787 | 0.801597 | 0.409433   | 0.657395   | BGIOSGA016959 | XP_006648796.1 PREDICTED: uncharacterized protein LOC102718342 isoform X1                             |
| TCONS_00008285 | 0.80176  | 0.85989    | 0.989567   | BGIOSGA006145 | XP_006659664.1 proteasome subunit alpha type-7-A                                                      |
| TCONS_00029417 | 0.801805 | 1.3988     | 1.12547    | BGIOSGA011334 |                                                                                                       |
| TCONS_00012814 | 0.802229 | 0.0253107  | 0.360377   | BGIOSGA003964 | XP_006663280.1 pentatricopeptide repeat-containing protein At4g18520                                  |
| TCONS_00011730 | 0.802403 | -1.32552   | -0.718293  | BGIOSGA006944 | XP_003558588.1 plant-specific TFIIIB-related protein 1                                                |
| TCONS_00010733 | 0.802709 | 0.113518   | -0.872875  | BGIOSGA029447 | XP_006651702.1 calcium-dependent protein kinase 10-like                                               |
| TCONS_00000286 | 0.803194 | 1.89673    | 0.796994   | BGIOSGA002862 | XP_004968344.1 universal stress protein PHOS32                                                        |
| TCONS_00002911 | 0.803262 | -1.50698   | 0.336037   | BGIOSGA023913 | XP_004968331.1 uncharacterized protein LOC101759345                                                   |
| TCONS_00008089 | 0.803301 | 0.944708   | 0.364433   | BGIOSGA016315 | XP_004975464.1 cytochrome b-c1 complex subunit Rieske, mitochondrial                                  |
| TCONS_00010602 | 0.803401 | -2.39781   | -0.763352  | BGIOSGA014650 | XP_006650352.1 protein YABBY 2                                                                        |
| TCONS_00034879 | 0.80385  | -0.438742  | 0.880428   | BGIOSGA033982 | XP_015698151.1 PREDICTED: uncharacterized protein LOC102715344                                        |
| TCONS_00029652 | 0.803933 | 0.911176   | 1.09439    | BGIOSGA030169 | XP_006660447.1 FRIGIDA-like protein 3                                                                 |
| TCONS_00034121 | 0.803944 | -0.480149  | -0.137575  | BGIOSGA036808 | XP_006662647.2 probable phyto kinase 2, chloroplastic                                                 |
| TCONS_00028130 | 0.804352 | -0.518205  | 1.47379    | BGIOSGA026858 | XP_006659478.2 putative F-box/LRR-repeat protein At3g18150                                            |
| TCONS_00018667 | 0.804459 | -4.31584   | -1.91486   | BGIOSGA002993 | XP_006655015.1 GDSL esterase/lipase At1g09390-like                                                    |
| TCONS_00028447 | 0.804516 | 0.80381    | -1.16865   | BGIOSGA026515 | XP_015695713.1 PREDICTED: uncharacterized protein ycf39, partial                                      |
| TCONS_00027960 | 0.804529 | -0.51313   | -1.00258   | BGIOSGA004933 | XP_006652056.1 DIBOA-glucoside dioxygenase BX6-like                                                   |
| TCONS_00018270 | 0.804694 | 1.21833    | 0.47293    | BGIOSGA001009 | XP_006655572.1 probable histone chaperone ASF1A                                                       |
| TCONS_00012342 | 0.804718 | -1.71761   | -3.98154   | BGIOSGA015937 | XP_006664886.1 PREDICTED: uncharacterized protein LOC102708677                                        |
| TCONS_00003466 | 0.804772 | -0.994304  | -0.215197  | BGIOSGA001754 | XP_022682343.1 F-box protein SKIP23-like                                                              |
| TCONS_00009973 | 0.804794 | 0.697771   | 0.383751   | BGIOSGA023437 | XP_006650010.1 14 kDa zinc-binding protein isoform X1                                                 |
| TCONS_00007380 | 0.805164 | 0.911338   | 0.443109   | BGIOSGA007096 | XP_006646903.1 single-stranded DNA-binding protein WHY2, mitochondrial                                |
| TCONS_00030442 | 0.805415 | -0.34385   | 0.0950723  | BGIOSGA006546 | XP_006660906.1 synaptotagmin-1-like                                                                   |
| TCONS_00032351 | 0.805465 | -0.243564  | 1.09645    | BGIOSGA030655 | XP_006662410.2 plant intracellular Ras-group-related LRR protein 8                                    |
| TCONS_00023148 | 0.805498 | 0.418942   | 0.300991   | BGIOSGA018909 | XP_004955496.1 uncharacterized protein At5g39865                                                      |
| TCONS_00030069 | 0.805544 | 1.38718    | 0.586279   | BGIOSGA028416 | XP_006660638.2 probable monogalactosyldiacylglycerol synthase 1, chloroplastic                        |
| TCONS_00021571 | 0.806216 | 0.959408   | 2.19482    | BGIOSGA021975 | XP_002437788.1 peptide methionine sulfoxide reductase A5 isoform X1                                   |
| TCONS_00019647 | 0.806302 | 2.31977    | 0.440175   | BGIOSGA037278 | XP_015692667.1 receptor-like protein kinase 5                                                         |
| TCONS_00013020 | 0.806688 | -1.39341   | 1.20758    | BGIOSGA003613 | XP_006651730.2 beta-glucosidase 7                                                                     |
| TCONS_00026570 | 0.806696 | 0.436238   | 1.40154    | BGIOSGA028632 | XP_024318248.1 pentatricopeptide repeat-containing protein At5g12100, mitochondrial isoform X1        |
| TCONS_00029708 | 0.80706  | 1.67179    | 1.31126    | BGIOSGA020692 | XP_003577911.1 sulfE-like protein 1, chloroplastic/mitochondrial                                      |
| TCONS_00010648 | 0.807235 | 0.98974    | 1.74157    | BGIOSGA013267 | XP_002466700.1 uncharacterized protein LOC8056751 isoform X1                                          |
| TCONS_00005846 | 0.807536 | 0.0627294  | 0.996348   | BGIOSGA007970 | XP_006647167.1 F-box protein At3g58530                                                                |
| TCONS_00019724 | 0.807669 | 0.847496   | 0.199967   | BGIOSGA029517 | XP_006654734.1 chaperone protein dnaJ 10-like                                                         |

transcriptome

|                 |          |           |            |               |                                                                                                                                              |
|-----------------|----------|-----------|------------|---------------|----------------------------------------------------------------------------------------------------------------------------------------------|
| TCONS_00004857  | 0.808592 | 1.83092   | 1.89197    | BGIOSGA000362 | XP_006645144.2 peptide chain release factor 1<br>XP_006644957.1 dual specificity tyrosine-phosphorylation-regulated kinase 2-like isoform X1 |
| TCONS_00002114  | 0.809101 | 0.687568  | 0.906657   | BGIOSGA014409 |                                                                                                                                              |
| TCONS_00014398  | 0.809176 | 0.92334   | 0.342253   | BGIOSGA014531 | XP_024312041.1 protein FLOURY 1-like<br>XP_015696580.1 pentatricopeptide repeat-containing protein At4g01400, mitochondrial-like             |
| TCONS_00029390  | 0.809334 | 0.645427  | 0.935303   | BGIOSGA031143 | XP_015690929.1 serine/threonine-protein kinase HT1-like                                                                                      |
| TCONS_00010577  | 0.809428 | 1.36634   | 2.07616    | BGIOSGA013062 |                                                                                                                                              |
| TCONS_00001264  | 0.809525 | 1.60455   | 1.29097    | BGIOSGA036929 | XP_004969063.1 protein MLN51 homolog<br>XP_015691391.1 translation initiation factor IF-2-like                                               |
| TCONS_00015551  | 0.809576 | -0.717448 | 0.538773   | BGIOSGA029541 |                                                                                                                                              |
| TCONS_00017105  | 0.809615 | #N/A      | 1.04564    | BGIOSGA031688 | XP_006654025.1 transcription factor MYB46-like<br>XP_009405654.1 iron-sulfur cluster assembly protein 1-like                                 |
| TCONS_00018330  | 0.809896 | 1.70983   | -0.117054  | BGIOSGA001079 | XP_004971181.1 mitochondrial thiamine diphosphate carrier 2 isoform X1                                                                       |
| TCONS_00002474  | 0.810017 | 1.07503   | 1.60251    | BGIOSGA005118 |                                                                                                                                              |
| TCONS_00008814  | 0.810042 | -0.361884 | 0.0937405  | #N/A          | #N/A                                                                                                                                         |
| TCONS_00003235  | 0.810186 | 1.76648   | 0.615297   | BGIOSGA033678 | NP_001105262.2 uncharacterized LOC542172<br>XP_006645764.1 histidine biosynthesis bifunctional protein hisIE, chloroplastic                  |
| TCONS_00003315  | 0.810317 | 0.293964  | 1.30676    | BGIOSGA001899 | XP_006657902.1 UPF0553 protein-like isoform X1                                                                                               |
| TCONS_00024011  | 0.810317 | 2.07465   | 1.31883    | BGIOSGA026047 |                                                                                                                                              |
| TCONS_00014977  | 0.810331 | 0.210636  | -1.36776   | BGIOSGA004829 | XP_006653781.1 aminomethyltransferase, mitochondrial<br>XP_015699134.1 histidinol dehydrogenase, chloroplastic                               |
| TCONS_00000505  | 0.810835 | 0.820433  | 1.43471    | BGIOSGA003078 | XP_004974991.1 glyoxylate/hydroxypyruvate reductase HPR3                                                                                     |
| TCONS_00013610  | 0.810966 | 0.708183  | -0.341748  | BGIOSGA037023 | XP_004970524.1 ubiquitin-conjugating enzyme E2 7 isoform X2                                                                                  |
| TCONS_00004696  | 0.811142 | 0.390487  | 0.305718   | BGIOSGA019991 | XP_006656149.2 aspartate aminotransferase, mitochondrial-like                                                                                |
| TCONS_00022390  | 0.811396 | 0.971773  | 1.10299    | BGIOSGA007852 | XP_006647487.1 4-hydroxy-3-methylbut-2-en-1-yl diphosphate synthase (ferredoxin), chloroplastic                                              |
| TCONS_00008332  | 0.812284 | 1.47477   | -0.121276  | BGIOSGA006093 | XP_021320796.1 transmembrane 9 superfamily member 12 isoform X3                                                                              |
| TCONS_00028240  | 0.812629 | 0.846417  | 1.12986    | BGIOSGA008949 |                                                                                                                                              |
| TCONS_00022531  | 0.812984 | 1.30512   | 1.12461    | BGIOSGA010548 | XP_006657115.1 transcription factor GAMYB-like<br>XP_022683053.1 protein EMSY-LIKE 3 isoform X2                                              |
| TCONS_00026924  | 0.812984 | 1.49275   | 1.1835     | BGIOSGA030091 |                                                                                                                                              |
| TCONS_00008771  | 0.813108 | 1.13026   | 1.3569     | BGIOSGA005663 | XP_006647857.1 dihydropyrimidine dehydrogenase (NADP(+)), chloroplastic                                                                      |
| TCONS_00019263  | 0.814335 | 0.9235    | 0.32016    | BGIOSGA018087 | XP_006654376.1 B11-like protein<br>XP_006649920.2 ethylene-overproduction protein 1                                                          |
| TCONS_00009859  | 0.81493  | 0.288162  | 1.12844    | BGIOSGA003683 | XP_006664138.1 PREDICTED: uncharacterized protein LOC102707081                                                                               |
| TCONS_00036299  | 0.814993 | -1.31785  | -1.05375   | BGIOSGA010009 | XP_022681911.1 uncharacterized protein LOC101760546 isoform X2                                                                               |
| TCONS_00037842  | 0.815286 | 1.17669   | -0.144153  | BGIOSGA023144 | XP_006655850.1 PREDICTED: uncharacterized protein LOC102721559, partial                                                                      |
| TCONS_00020234  | 0.815974 | 0.30135   | 1.6615     | BGIOSGA022425 | XP_015690785.1 PREDICTED: uncharacterized protein LOC102722191                                                                               |
| TCONS_00011397  | 0.816414 | 0.131701  | 0.264126   | BGIOSGA011627 |                                                                                                                                              |
| TCONS_00021204  | 0.816797 | 1.13076   | 1.04187    | BGIOSGA031262 | XP_006656345.1 ALA-interacting subunit 1-like<br>XP_004967793.1 protein CASPARIAN STRIP INTEGRITY FACTOR 1                                   |
| TCONS_00000608  | 0.816929 | -0.65139  | -0.0437631 | BGIOSGA007201 | XP_015690815.1 zinc finger A20 and AN1 domain-containing stress-associated protein 6                                                         |
| TCONS_00013320  | 0.816929 | 0.821583  | -0.378586  | BGIOSGA009661 | XP_021302153.1 uncharacterized protein LOC8064571 isoform X1                                                                                 |
| TCONS_00011317  | 0.816973 | 0.452098  | 1.61721    | BGIOSGA023755 |                                                                                                                                              |
| TCONS_00008195  | 0.817056 | 1.45199   | 1.33689    | BGIOSGA007734 | XP_006648751.1 MLO-like protein 1                                                                                                            |
| TCONS_00020602  | 0.817087 | 1.20266   | 0.564017   | #N/A          | #N/A                                                                                                                                         |
| TCONS_00030697  | 0.817303 | -0.761558 | 0.163831   | BGIOSGA032518 | XP_015697194.1 PREDICTED: uncharacterized protein LOC102717552 isoform X1                                                                    |
| TCONS_00034690  | 0.817346 | 0.987682  | 0.616285   | BGIOSGA009087 | XP_015688363.1 pentatricopeptide repeat-containing protein At1g73400, mitochondrial-like                                                     |
| TCONS_00015866  | 0.817391 | -3.00063  | -1.15638   | BGIOSGA014058 | XP_006653383.2 protein YLS9-like<br>XP_006650532.1 PREDICTED: uncharacterized protein LOC102701709                                           |
| TCONS_00010877  | 0.817783 | 1.10292   | 1.39528    | BGIOSGA024894 | XP_006659693.1 PREDICTED: uncharacterized protein LOC102721386                                                                               |
| TCONS_00027141  | 0.818009 | -0.418778 | -1.79141   | BGIOSGA037411 | XP_006647779.1 histidinol-phosphate aminotransferase, chloroplastic-like                                                                     |
| TCONS_00008670  | 0.818455 | 0.389518  | 0.0682159  | BGIOSGA014973 |                                                                                                                                              |
| TCONS_00028094  | 0.818718 | 2.47671   | 1.99305    | BGIOSGA009171 | XP_006660174.1 protein ecdysoneless homolog<br>XP_006650258.2 psbP-like protein 1, chloroplastic isoform X1                                  |
| TCONS_00027876  | 0.819193 | 0.219624  | 1.2173     | BGIOSGA027127 |                                                                                                                                              |
| TCONS_00032230  | 0.820203 | 1.16953   | 0.114944   | BGIOSGA006684 | XP_003571791.2 chlorophyllase-2, chloroplastic<br>XP_015692314.1 transcriptional corepressor LEUNIG_HOMOLOG isoform X2                       |
| TCONS_00014584  | 0.820281 | 0.285045  | 1.25962    | BGIOSGA013996 | XP_006654983.1 DNA replication complex GINS protein SLD5                                                                                     |
| TCONS_00017116  | 0.820537 | 0.846134  | 1.2273     | BGIOSGA019166 | XP_015693784.1 transcription initiation factor TFIID subunit 13                                                                              |
| TCONS_00000845  | 0.820677 | 0.890877  | 0.846432   | BGIOSGA003434 |                                                                                                                                              |
| TCONS_000004811 | 0.820883 | 1.37791   | 1.77983    | BGIOSGA000404 | XP_006645096.1 5'-3' exonuclease<br>XP_024311971.1 DNA mismatch repair protein MSH1, mitochondrial isoform X2                                |
| TCONS_00016214  | 0.820989 | 0.302643  | 0.328766   | BGIOSGA014757 | XP_015690871.1 25.3 kDa vesicle transport protein                                                                                            |
| TCONS_00013315  | 0.821232 | 1.32441   | 1.27226    | BGIOSGA028430 | XP_015698771.1 diacylglycerol kinase 1-like isoform X1                                                                                       |
| TCONS_00037412  | 0.82144  | 1.15003   | 0.970459   | BGIOSGA012913 | XP_006655932.1 HVA22-like protein a isoform X1                                                                                               |
| TCONS_00021904  | 0.821536 | 0.841313  | 0.724213   | BGIOSGA000885 |                                                                                                                                              |
| TCONS_00021656  | 0.82163  | 0.39045   | -0.447449  | BGIOSGA036312 | XP_010025545.1 histone H3.2                                                                                                                  |

## transcriptome

|                |          |            |             |              |                                                                                                                                            |
|----------------|----------|------------|-------------|--------------|--------------------------------------------------------------------------------------------------------------------------------------------|
| TCONS_00013825 | 0.821705 | 0.667824   | 0.709202    | BGOSGA016001 | XP_003581591.1 prostaglandin E synthase 2                                                                                                  |
| TCONS_00000862 | 0.821918 | 0.42529    | 0.000236683 | BGOSGA018778 | XP_020227577.1 importin subunit alpha-1a-like<br>XP_006661228.1 PREDICTED: uncharacterized protein LOC102704449                            |
| TCONS_00028991 | 0.821928 | 0.00809624 | 0.384199    | BGOSGA030750 | XP_015694331.1 3-ketoacyl-CoA synthase 11-like                                                                                             |
| TCONS_00020979 | 0.822178 | 2.62694    | 1.58769     | BGOSGA021494 | XP_006655982.1 myb-related protein 308-like                                                                                                |
| TCONS_00020471 | 0.822346 | 1.6342     | -2.17076    | BGOSGA027658 | XP_010231753.1 uncharacterized abhydrolase domain-containing protein DDB_G0269086<br>XP_006653903.1 nudix hydrolase 26, chloroplastic-like |
| TCONS_00017461 | 0.822561 | 0.378674   | 0.41367     | BGOSGA037837 | XP_006658115.1 phyloplanin-like                                                                                                            |
| TCONS_00015208 | 0.822581 | 0.786475   | 1.03131     | BGOSGA017388 | XP_006644184.1 peptidyl-prolyl cis-trans isomerase CYP21-4                                                                                 |
| TCONS_00024336 | 0.822775 | -3.19575   | 0.397649    | BGOSGA010762 | XP_006648155.1 V-type proton ATPase subunit F                                                                                              |
| TCONS_00025084 | 0.822926 | 0.213869   | 0.581079    | BGOSGA024317 | XP_015688472.1 gamma-glutamyl peptidase 5-like                                                                                             |
| TCONS_00007142 | 0.823064 | -0.0810792 | 0.291441    | BGOSGA015836 | XP_006648384.1 prostatic spermine-binding protein-like isoform X1                                                                          |
| TCONS_00007459 | 0.823079 | -1.25425   | 0.63477     | BGOSGA013348 | XP_006658483.1 pentatricopeptide repeat-containing protein At1g71490                                                                       |
| TCONS_00005568 | 0.823322 | 1.46755    | 0.705092    | BGOSGA007677 | XP_006644295.2 PREDICTED: uncharacterized protein LOC102712026                                                                             |
| TCONS_00023503 | 0.824341 | 1.00719    | 0.682258    | BGOSGA025543 | XP_006647331.1 neutral/alkaline invertase 3, chloroplastic                                                                                 |
| TCONS_00001080 | 0.825251 | 1.47954    | 1.15053     | BGOSGA003699 | XP_006647598.1 vesicle-associated protein 1-2-like                                                                                         |
| TCONS_00006186 | 0.825255 | 0.825489   | 0.709845    | BGOSGA003418 | XP_006653528.1 PREDICTED: uncharacterized protein LOC102709460, partial                                                                    |
| TCONS_00008474 | 0.825308 | 0.657827   | 0.136555    | BGOSGA031583 | XP_006653251.1 type 1 phosphatases regulator YPI1                                                                                          |
| TCONS_00014458 | 0.825557 | 0.554233   | -0.487311   | BGOSGA021475 | XP_004952813.2 protein disulfide isomerase-like 1-2                                                                                        |
| TCONS_00013918 | 0.825792 | -0.0580654 | -1.53008    | BGOSGA016727 | XP_006644671.1 reticulon-like protein B1                                                                                                   |
| TCONS_00008175 | 0.826249 | 1.22718    | 0.989477    | BGOSGA020102 | XP_006647794.1 protein NRT1/ PTR FAMILY 7.3-like isoform X1                                                                                |
| TCONS_00001777 | 0.826318 | 1.26786    | -0.160566   | BGOSGA026122 | XP_006649917.1 protein CHUP1, chloroplastic                                                                                                |
| TCONS_00008699 | 0.82687  | -2.58095   | -0.374625   | BGOSGA031434 | XP_004964545.1 uncharacterized protein LOC101767447                                                                                        |
| TCONS_00009854 | 0.828171 | -3.91136   | -1.18836    | BGOSGA012406 | XP_006650519.1 phosphatidylinositol transfer protein PDR17                                                                                 |
| TCONS_00021607 | 0.828425 | 2.7979     | 3.36315     | BGOSGA023145 | XP_002453412.1 proteasome subunit beta type-3                                                                                              |
| TCONS_00010864 | 0.828463 | 0.715092   | 0.0952628   | BGOSGA013485 | XP_015690288.1 PREDICTED: uncharacterized protein LOC102711054                                                                             |
| TCONS_00007471 | 0.828555 | 0.974976   | 0.168143    | BGOSGA001181 | XP_010923350.1 lipid phosphate phosphatase delta-like isoform X1                                                                           |
| TCONS_00012035 | 0.8286   | 0.34503    | 0.0911213   | BGOSGA010972 | XP_006655602.1 putative cryptochrome DASH, mitochondrial                                                                                   |
| TCONS_00013377 | 0.828789 | 1.26495    | 0.957522    | BGOSGA009607 | XP_006662737.1 CEN-like protein 2                                                                                                          |
| TCONS_00018333 | 0.828814 | -2.11175   | -1.08331    | BGOSGA004078 | XP_006649911.2 mitochondrial succinate-fumarate transporter 1                                                                              |
| TCONS_00034320 | 0.829326 | -0.618203  | 0.21111     | BGOSGA006319 | XP_003575150.1 NADPH-dependent pterin aldehyde reductase isoform X2                                                                        |
| TCONS_00009847 | 0.829606 | 2.11843    | 1.79536     | BGOSGA012399 | XP_015688224.1 probable serine incorporator isoform X3                                                                                     |
| TCONS_00006273 | 0.830001 | 0.192528   | 1.14975     | BGOSGA008431 | XP_006647613.2 U6 snRNA phosphodiesterase                                                                                                  |
| TCONS_00002959 | 0.830754 | -0.0476524 | -2.66029    | BGOSGA002257 | XP_015697466.1 PREDICTED: uncharacterized protein LOC102704739                                                                             |
| TCONS_00008501 | 0.830924 | -0.299261  | 0.297052    | BGOSGA005927 | XP_006656327.1 ubiquitin-conjugating enzyme E2 22                                                                                          |
| TCONS_00031607 | 0.831489 | -0.114633  | 0.505847    | BGOSGA012183 | XP_006649561.1 30S ribosomal protein S10, chloroplastic                                                                                    |
| TCONS_00021196 | 0.831629 | -0.0954554 | 0.472326    | BGOSGA023415 | XP_006654606.1 NAD(P)H dehydrogenase (quinone) FQR1-like                                                                                   |
| TCONS_00011729 | 0.831734 | 1.11263    | 0.956445    | BGOSGA011281 | XP_006646300.1 RING-H2 finger protein ATL67-like                                                                                           |
| TCONS_00019581 | 0.83185  | -2.20622   | -1.79527    | BGOSGA027686 | XP_002467921.1 uncharacterized protein LOC8083674                                                                                          |
| TCONS_00004353 | 0.832146 | 0.378378   | 1.11087     | BGOSGA020051 | XP_002452577.1 TORTIFOLIA1-like protein 3                                                                                                  |
| TCONS_00018025 | 0.832205 | 1.06786    | 0.434674    | BGOSGA020072 | XP_015698082.1 putative disease resistance RPP13-like protein 3                                                                            |
| TCONS_00008782 | 0.83352  | -1.60395   | 0.0748552   | BGOSGA022616 | XP_015693468.1 probable beta-1,3-galactosyltransferase 10                                                                                  |
| TCONS_00033873 | 0.833709 | 1.66719    | 1.04636     | BGOSGA035095 | XP_006654511.1 PREDICTED: uncharacterized protein LOC102712810                                                                             |
| TCONS_00020222 | 0.833793 | 1.10954    | 1.1127      | BGOSGA028592 | XP_006644261.1 UPF0587 protein C1orf123                                                                                                    |
| TCONS_00017939 | 0.834247 | 0.112721   | -0.801312   | BGOSGA035974 | XP_015688849.1 short-chain dehydrogenase/reductase family 42E member 1                                                                     |
| TCONS_00003820 | 0.834315 | 1.39271    | -0.250753   | BGOSGA001396 | XP_006652913.1 protein TSS-like                                                                                                            |
| TCONS_00006750 | 0.835042 | 0.525801   | 0.466262    | BGOSGA008919 | XP_006662126.1 serine carboxypeptidase-like 6                                                                                              |
| TCONS_00015058 | 0.835368 | 0.634553   | -0.280919   | BGOSGA017453 | XP_006644788.1 photosystem II reaction center W protein, chloroplastic                                                                     |
| TCONS_00031699 | 0.83556  | 2.77959    | 1.06809     | BGOSGA008839 | NP_001152052.1 RNA-binding protein                                                                                                         |
| TCONS_00004492 | 0.835784 | -0.949434  | 0.0645262   | BGOSGA020157 | XP_002452602.1 ADP-ribosylation factor-like protein 8c                                                                                     |
| TCONS_00023477 | 0.835946 | 0.343232   | 0.32371     | BGOSGA005008 | XP_015693731.1 PREDICTED: uncharacterized protein LOC107304379                                                                             |
| TCONS_00008755 | 0.836178 | -0.0791997 | 0.108119    | BGOSGA011269 | XP_006649578.1 PREDICTED: uncharacterized protein LOC102707381                                                                             |
| TCONS_00022757 | 0.836439 | 0.431875   | 0.737515    | BGOSGA020698 | XP_006659102.1 glycine-rich RNA-binding protein 4, mitochondrial-like                                                                      |
| TCONS_00009510 | 0.837029 | 0.645254   | 1.94661     | BGOSGA012059 | XP_015692758.1 NAC domain-containing protein 83-like                                                                                       |
| TCONS_00027314 | 0.837232 | 1.10456    | 2.01068     | BGOSGA010992 |                                                                                                                                            |
| TCONS_00002447 | 0.837848 | 0.0831622  | -0.0313049  | BGOSGA037382 |                                                                                                                                            |

## transcriptome

|                |          |            |             |               |                                                                                                  |
|----------------|----------|------------|-------------|---------------|--------------------------------------------------------------------------------------------------|
| TCONS_00003280 | 0.837874 | 0.654102   | 0.821885    | BGIOSGA001935 | XP_006644031.2 translin-associated protein X                                                     |
| TCONS_00027244 | 0.838333 | 1.73982    | 1.27594     | BGIOSGA027759 | XP_015696209.1 molybdate-anion transporter<br>XP_006664369.1 nuclear pore complex protein NUP98A |
| TCONS_00035631 | 0.838368 | -1.52831   | -0.766094   | BGIOSGA037053 | XP_004957100.1 uncharacterized protein LOC101761820                                              |
| TCONS_00029210 | 0.838795 | -0.84593   | 0.103659    | BGIOSGA028882 | XP_006646766.1 L-lactate dehydrogenase A                                                         |
| TCONS_00005231 | 0.839028 | 1.17707    | -0.398215   | BGIOSGA029843 | XP_004970838.12-C-methyl-D-erythritol 4-phosphate cytidyltransferase, chloroplastic              |
| TCONS_00002306 | 0.839107 | 0.42191    | 0.19426     | BGIOSGA004947 | XP_021305816.1E3 ubiquitin-protein ligase RLIM-like isoform X2                                   |
| TCONS_00021732 | 0.839146 | 0.0877047  | 0.260143    | BGIOSGA005298 | XP_006659075.1 fructose-bisphosphate aldolase cytoplasmic isozyme-like                           |
| TCONS_00027262 | 0.839203 | 1.78453    | 0.508243    | BGIOSGA037061 | XP_015688901.1 probable inactive nicotinamidase At3g16190                                        |
| TCONS_00007782 | 0.839362 | -0.0679826 | 0.0974699   | BGIOSGA006702 | XP_006649585.1 vicilin-like seed storage protein At2g18540                                       |
| TCONS_00011746 | 0.839454 | 0.580073   | 0.673978    | BGIOSGA011259 | XP_006649433.1PREDICTED: uncharacterized protein LOC102713804                                    |
| TCONS_00011603 | 0.839651 | -1.21227   | 0.574684    | BGIOSGA028533 | XP_006657437.1 uncharacterized oxidoreductase At1g06690, chloroplastic-like                      |
| TCONS_00023103 | 0.840148 | -0.101973  | -1.05708    | BGIOSGA025136 | XP_021314843.1heavy metal-associated isoprenylated plant protein 39                              |
| TCONS_00032610 | 0.840191 | 2.45956    | -0.151538   | BGIOSGA011760 | XP_004979533.2myosin-binding protein 7                                                           |
| TCONS_00033713 | 0.840289 | 0.81291    | 0.643054    | BGIOSGA013227 | XP_006644549.1 phytochrome-associated serine/threonine-protein phosphatase                       |
| TCONS_00001610 | 0.84041  | 0.245278   | 0.583666    | BGIOSGA023128 | XP_006649178.1 coumaroyl-CoA:anthocyanidin 3-O-glucoside-6"-O-coumaroyltransferase 2-like        |
| TCONS_00009059 | 0.840508 | 1.30645    | 0.0899712   | BGIOSGA009821 | XP_010230919.1sec-independent protein translocase protein TATC, chloroplastic                    |
| TCONS_00003638 | 0.840744 | -0.76733   | 0.380834    | BGIOSGA001569 | XP_002441416.1anthocyanidin 5,3-O-glucosyltransferase                                            |
| TCONS_00019663 | 0.840841 | 1.0304     | 0.76722     | BGIOSGA035541 | XP_004987307.2peptide methionine sulfoxide reductase B1, chloroplastic isoform X2                |
| TCONS_00020722 | 0.840928 | -0.44917   | -1.8976     | BGIOSGA028098 | XP_006654703.1 UBA domain-containing protein 3-like isoform X1                                   |
| TCONS_00018195 | 0.841357 | 0.768882   | 0.154989    | BGIOSGA004680 | XP_006656299.1PREDICTED: uncharacterized protein LOC102713371                                    |
| TCONS_00021141 | 0.841594 | -0.99532   | 0.277182    | BGIOSGA019255 | XP_006644392.1 mitochondrial import receptor subunit TOM7-1-like                                 |
| TCONS_00004020 | 0.84164  | 1.10744    | 0.673242    | BGIOSGA000868 | XP_006643716.1 alanine--tRNA ligase isoform X1                                                   |
| TCONS_00002725 | 0.842574 | 1.14227    | 0.229368    | BGIOSGA038682 | XP_015690811.1PREDICTED: uncharacterized protein LOC107303928                                    |
| TCONS_00009816 | 0.842653 | -0.861716  | -0.777185   | BGIOSGA012369 | XP_004971406.1eukaryotic translation initiation factor 4E-1                                      |
| TCONS_00002620 | 0.84274  | 1.04897    | 0.121634    | BGIOSGA005260 | XP_015690311.1PREDICTED: uncharacterized protein LOC102708595                                    |
| TCONS_00011584 | 0.842774 | -0.19664   | -0.941969   | BGIOSGA011431 | XP_015694155.1PREDICTED: uncharacterized protein LOC102705538                                    |
| TCONS_00001225 | 0.843881 | -0.897716  | 0.184951    | BGIOSGA003853 | XP_022683074.1uncharacterized protein LOC101767369                                               |
| TCONS_00026653 | 0.844557 | 1.06097    | 0.0997943   | BGIOSGA018543 | XP_015695574.1PREDICTED: uncharacterized protein LOC102716896                                    |
| TCONS_00026433 | 0.844638 | 1.92607    | 1.02407     | BGIOSGA028504 | XP_006649245.1 vacuolar protein sorting-associated protein 24 homolog 1-like                     |
| TCONS_00009154 | 0.844844 | 0.207728   | 0.591182    | BGIOSGA024311 | XP_006650003.1 membrane steroid-binding protein 2-like                                           |
| TCONS_00009967 | 0.844936 | 1.76604    | 1.19955     | BGIOSGA012521 | #N/A                                                                                             |
| TCONS_00028013 | 0.845007 | 0.101091   | 1.04463     | #N/A          | #N/A                                                                                             |
| TCONS_00015833 | 0.845162 | 1.32732    | 2.5848      | BGIOSGA019877 | XP_004975523.1uncharacterized protein LOC101781948                                               |
| TCONS_00031661 | 0.845644 | 0.0229717  | 1.19787     | BGIOSGA033473 | XP_006662083.2PREDICTED: uncharacterized protein LOC102717376, partial                           |
| TCONS_00018659 | 0.845712 | 1.07942    | 1.07094     | BGIOSGA011667 | XP_006654071.1 tubulin gamma-2 chain                                                             |
| TCONS_00009530 | 0.84577  | 0.262266   | 0.54637     | BGIOSGA032113 | XP_006649596.2 CASP-like protein 5A1                                                             |
| TCONS_00006332 | 0.846474 | 0.767112   | 0.453583    | BGIOSGA011837 | XP_006647421.1 14-3-3-like protein GF14-E isoform X1                                             |
| TCONS_00025170 | 0.84651  | 0.918337   | 0.345262    | BGIOSGA014635 | XP_006657745.1 SH3 domain-containing protein 3                                                   |
| TCONS_00013358 | 0.846585 | 1.59126    | 1.85304     | BGIOSGA009626 | XP_006651918.2 FAD synthetase, chloroplastic                                                     |
| TCONS_00009606 | 0.846808 | 2.06415    | 1.72695     | BGIOSGA025247 | XP_015690243.1 heat stress transcription factor A-9                                              |
| TCONS_00014157 | 0.847766 | 1.04363    | 0.893018    | BGIOSGA007688 | XP_006652230.2PREDICTED: uncharacterized protein LOC102716118, partial                           |
| TCONS_00023005 | 0.847943 | 0.235577   | 0.289651    | BGIOSGA025427 | XP_021308281.1eukaryotic translation initiation factor 5A-like                                   |
| TCONS_00021616 | 0.84813  | 0.606331   | 1.26158     | BGIOSGA021903 | XP_004964841.1uncharacterized protein LOC101785241                                               |
| TCONS_00025366 | 0.848151 | 0.902306   | 0.834082    | BGIOSGA025968 | XP_006657857.1 HVA22-like protein k                                                              |
| TCONS_00036251 | 0.848688 | 1.53103    | 0.689241    | BGIOSGA035708 | XP_006664112.1 ATP-citrate synthase alpha chain protein 3                                        |
| TCONS_00026582 | 0.850013 | 0.218903   | 0.0916885   | BGIOSGA011326 | XP_003574464.1ethylene-responsive transcription factor RAP2-13                                   |
| TCONS_00029735 | 0.85082  | -0.400346  | -0.128436   | BGIOSGA030086 | XP_015696568.1 meiotic nuclear division protein 1 homolog                                        |
| TCONS_00020082 | 0.851017 | 0.169127   | 0.554864    | BGIOSGA035281 | XP_015694264.1 transcription factor GTE1                                                         |
| TCONS_00010574 | 0.851091 | -2.40937   | 0.213584    | BGIOSGA035756 | XP_006650326.1 putative receptor protein kinase CRINKLY4                                         |
| TCONS_00024056 | 0.851318 | 1.79545    | -0.00937129 | BGIOSGA033209 | XP_006658783.1 COBRA-like protein 1 isoform X1                                                   |
| TCONS_00024326 | 0.851324 | 1.46129    | -0.046282   | BGIOSGA018789 | XP_006658100.1 stress-related protein                                                            |
| TCONS_00014996 | 0.852307 | 1.36169    | 1.79554     | BGIOSGA037414 | XP_006653790.1 pentatricopeptide repeat-containing protein At3g20730                             |
| TCONS_00019471 | 0.852398 | 0.430286   | 1.04685     | BGIOSGA007233 | XP_015693378.1 probable methyltransferase PMT23                                                  |

## transcriptome

|                |          |            |              |              |                                                                                                  |
|----------------|----------|------------|--------------|--------------|--------------------------------------------------------------------------------------------------|
| TCONS_00031325 | 0.852537 | 1.05492    | 0.546293     | BGOSGA033138 | XP_006661864.1 mitochondrial import inner membrane translocase subunit Tim16-like isoform X2     |
| TCONS_00012792 | 0.853701 | 2.79829    | 2.49023      | BGOSGA031553 | XP_006650332.1 histone-binding protein MSI1 homolog                                              |
| TCONS_00008742 | 0.854337 | 1.92584    | 0.82907      | BGOSGA022681 | XP_004953784.1H/ACA ribonucleoprotein complex subunit 2-like protein                             |
| TCONS_00029597 | 0.854547 | 0.473726   | 0.20149      | BGOSGA014003 | XP_006660420.1 CBS domain-containing protein CBSX1, chloroplastic-like                           |
| TCONS_00036719 | 0.855321 | -2.71774   | 1.39698      | BGOSGA032640 | NP_001142857.1 uncharacterized protein LOC100275251                                              |
| TCONS_00008387 | 0.855393 | -2.68032   | -0.0358435   | BGOSGA014754 | XP_006647520.1 CLIP-associated protein-like                                                      |
| TCONS_00012954 | 0.855845 | 1.20323    | 0.903        | BGOSGA009569 | XP_015690307.1 protein SAAL1 isoform X2                                                          |
| TCONS_00010168 | 0.856035 | -0.564733  | -0.605289    | #N/A         | #N/A                                                                                             |
| TCONS_00024612 | 0.856442 | -0.223015  | 0.0591306    | BGOSGA030919 | XP_015694533.1 probable carboxylesterase 15 XP_006658087.2 DNA polymerase zeta catalytic subunit |
| TCONS_00023339 | 0.856508 | 0.740268   | 1.01545      | BGOSGA026354 | XP_003575200.1 uncharacterized protein LOC100831971                                              |
| TCONS_00006299 | 0.856629 | 1.74012    | 0.278181     | BGOSGA022347 | XP_020406526.1 uncharacterized protein LOC109945126                                              |
| TCONS_00033438 | 0.857045 | 0.146093   | 0.597206     | BGOSGA030203 | XP_006649117.1 vacuolar amino acid transporter 1                                                 |
| TCONS_00008944 | 0.857048 | 1.43778    | 1.12116      | BGOSGA005463 | XP_012461032.1 PREDICTED: uncharacterized protein LOC105781011                                   |
| TCONS_00002803 | 0.857231 | -0.0334978 | 0.98958      | BGOSGA019909 | XP_004985802.1 uncharacterized protein LOC101763926                                              |
| TCONS_00004565 | 0.857454 | 1.40766    | 1.10848      | BGOSGA030255 | XP_006658290.1 33 kDa ribonucleoprotein, chloroplastic                                           |
| TCONS_00024597 | 0.857484 | 1.57385    | 1.09359      | BGOSGA028908 | XP_010230226.1 cytochrome b561 and DOMON domain-containing protein At5g47530                     |
| TCONS_00009489 | 0.857743 | 1.44926    | 0.012338     | BGOSGA009834 | XP_021318233.1 helicase sen1                                                                     |
| TCONS_00016476 | 0.857776 | 1.9761     | 2.27327      | BGOSGA031487 | XP_006650378.1 tubulin beta-8 chain                                                              |
| TCONS_00010632 | 0.85788  | -1.39834   | -0.368699    | BGOSGA004651 | #N/A                                                                                             |
| TCONS_00028040 | 0.857945 | 1.44901    | 1.01183      | #N/A         | #N/A                                                                                             |
| TCONS_00020738 | 0.858011 | 0.465207   | 1.47554      | BGOSGA022931 | XP_006656096.1 formate dehydrogenase 1, mitochondrial                                            |
| TCONS_00004569 | 0.858373 | 1.91958    | 0.880945     | BGOSGA000645 | XP_015692605.1 PREDICTED: uncharacterized protein LOC102710070                                   |
| TCONS_00022931 | 0.858526 | 0.612249   | 0.330317     | BGOSGA021106 | XP_006656504.2 PREDICTED: uncharacterized protein LOC102700628                                   |
| TCONS_00001614 | 0.858603 | 1.26643    | 0.61644      | BGOSGA002737 | XP_015693873.1 lipid phosphate phosphatase 2-like isoform X1                                     |
| TCONS_00007101 | 0.858839 | -1.51242   | -0.000225142 | BGOSGA009282 | XP_006648102.1 PREDICTED: uncharacterized protein LOC102715735                                   |
| TCONS_00008946 | 0.858861 | 1.36795    | 1.31255      | BGOSGA006069 | XP_006648031.1 serine/arginine-rich splicing factor RSZ21 isoform X1                             |
| TCONS_00004735 | 0.859015 | 1.78238    | 0.82789      | BGOSGA008342 | XP_006645025.2 putative ataxin-3 homolog                                                         |
| TCONS_00019937 | 0.860105 | 2.49448    | 1.63347      | BGOSGA003251 | XP_015694423.1 E3 ubiquitin-protein ligase RING1-like isoform X4                                 |
| TCONS_00003879 | 0.860136 | 0.257767   | -0.0812517   | BGOSGA022935 | XP_006646038.2 myosin-11-like                                                                    |
| TCONS_00026745 | 0.860185 | -0.807424  | 0.908425     | BGOSGA028803 | XP_015695766.1 protein EMBRYO SAC DEVELOPMENT ARREST 3, chloroplastic                            |
| TCONS_00009680 | 0.860285 | 0.466615   | 0.785544     | BGOSGA015550 | XP_006649736.1 PREDICTED: uncharacterized protein LOC102705512                                   |
| TCONS_00017331 | 0.860346 | 0.68281    | 1.19834      | BGOSGA026327 | XP_006655097.1 pentatricopeptide repeat-containing protein At3g49170, chloroplastic              |
| TCONS_00022987 | 0.8611   | 0.607474   | -0.202733    | BGOSGA013594 | XP_006658212.2 two pore potassium channel b-like                                                 |
| TCONS_00018663 | 0.861149 | -0.967859  | 1.13989      | BGOSGA018772 | NP_001136908.14Fe-4S ferredoxin, iron-sulfur binding protein                                     |
| TCONS_00008667 | 0.861325 | 1.58151    | 2.06014      | BGOSGA005763 | XP_006647770.1 universal stress protein A-like protein                                           |
| TCONS_00004213 | 0.861973 | 0.452683   | 1.28304      | BGOSGA000989 | XP_006644550.1 PREDICTED: uncharacterized protein LOC102716543 isoform X1                        |
| TCONS_00024580 | 0.862129 | #N/A       | 0.884236     | BGOSGA024812 | XP_004955458.1 uncharacterized protein LOC101758435                                              |
| TCONS_00014235 | 0.862435 | 2.78651    | 0.61722      | BGOSGA030245 | XP_006648710.1 U-box domain-containing protein 27                                                |
| TCONS_00031413 | 0.862531 | 1.26229    | 1.18812      | BGOSGA033224 | XP_015697143.1 pentatricopeptide repeat-containing protein At2g20710, mitochondrial-like         |
| TCONS_00011043 | 0.86256  | 0.521215   | 0.722703     | BGOSGA009742 | XP_006650664.1 cytochrome c oxidase subunit 6a, mitochondrial                                    |
| TCONS_00029687 | 0.863373 | 0.678252   | -0.00179158  | BGOSGA026161 | XP_002463491.1 phosphoglycolate phosphatase 2 isoform X1                                         |
| TCONS_00008547 | 0.863532 | 0.810472   | 0.271863     | BGOSGA005881 | XP_006647658.1 transmembrane protein 208 homolog                                                 |
| TCONS_00034732 | 0.863692 | 0.403636   | -1.44152     | #N/A         | #N/A                                                                                             |
| TCONS_00019444 | 0.864031 | -3.82915   | -3.70349     | BGOSGA012351 | XP_006654519.1 PREDICTED: uncharacterized protein LOC102715759                                   |
| TCONS_00020229 | 0.864097 | -0.804452  | 0.357211     | BGOSGA006303 | XP_004964695.1 pyrophosphate-energized vacuolar membrane proton pump                             |
| TCONS_00022012 | 0.864378 | 0.592919   | 0.843703     | BGOSGA029558 | XP_002438190.1 uncharacterized protein At1g66480                                                 |
| TCONS_00016158 | 0.86452  | -1.44902   | -1.0713      | BGOSGA023597 | XP_006652456.1 B-box zinc finger protein 24-like                                                 |
| TCONS_00007883 | 0.864523 | 1.68584    | 1.25838      | BGOSGA027506 | XP_010907847.1 putative F-box/LRR-repeat protein 23                                              |
| TCONS_00014766 | 0.864639 | 1.27066    | 0.673129     | BGOSGA016942 | XP_006652657.1 replication factor C subunit 4                                                    |
| TCONS_00020510 | 0.865037 | 1.33472    | 1.49833      | BGOSGA005691 | XP_002436854.1H/ACA ribonucleoprotein complex subunit 2-like protein                             |
| TCONS_00029477 | 0.865048 | 1.24049    | 0.947084     | BGOSGA003204 | XP_006661517.1 UTP--glucose-1-phosphate uridylyltransferase                                      |
| TCONS_00033356 | 0.865191 | 0.395376   | 0.656481     | BGOSGA037198 | XP_004979201.1 adenylate kinase 4                                                                |
| TCONS_00012128 | 0.865483 | 1.45135    | 1.67103      | BGOSGA022686 | XP_006651312.1 histone-lysine N-methyltransferase EZ3 isoform X1                                 |

## transcriptome

|                |          |           |            |               |                                                                                          |
|----------------|----------|-----------|------------|---------------|------------------------------------------------------------------------------------------|
| TCONS_00035564 | 0.866028 | 1.00588   | 0.63931    | BGIOSGA035837 | XP_015697554.1 protein TRAUCO-like                                                       |
| TCONS_00036496 | 0.866591 | 0.982239  | 0.718509   | BGIOSGA027604 | XP_006664238.1 E3 ubiquitin-protein ligase RNF5-like                                     |
| TCONS_00018176 | 0.866596 | 0.352017  | 0.0610564  | BGIOSGA029943 | XP_004961420.1ubiquitin domain-containing protein 2                                      |
| TCONS_00004976 | 0.866971 | 0.882437  | 1.28206    | BGIOSGA005533 | XP_006646613.2 protein CPR-5-like                                                        |
| TCONS_00003450 | 0.867104 | 1.45343   | 0.847594   | BGIOSGA001776 | XP_006645831.1 suppressor of mec-8 and unc-52 protein homolog 1                          |
| TCONS_00017238 | 0.867375 | 1.86359   | -0.370411  | BGIOSGA019280 | XP_006655056.1PREDICTED: uncharacterized protein LOC102710126                            |
| TCONS_00024389 | 0.867685 | 1.75868   | 1.30944    | BGIOSGA014768 | XP_015694848.1 nuclear poly(A) polymerase 3                                              |
| TCONS_00028457 | 0.869294 | 1.34096   | 0.830061   | BGIOSGA027053 | XP_015695967.1 28 kDa ribonucleoprotein, chloroplastic-like                              |
| TCONS_00004848 | 0.869618 | -0.072828 | -0.498581  | BGIOSGA000371 | NP_001145171.1uncharacterized LOC100278407                                               |
| TCONS_00006695 | 0.870079 | 1.08855   | 0.483587   | BGIOSGA004569 | XP_006647732.2 secretory carrier-associated membrane protein 5                           |
| TCONS_00001623 | 0.870227 | 1.86091   | 0.832973   | BGIOSGA004257 | XP_021312654.1uncharacterized protein LOC8063107 isoform X1                              |
| TCONS_00036956 | 0.870352 | 0.0984045 | -0.798327  | BGIOSGA011073 | XP_006663942.1 isoflavone reductase homolog                                              |
| TCONS_00022359 | 0.870382 | 0.893237  | 1.45233    | BGIOSGA021113 | XP_006657021.2 protein DJ-1 homolog A                                                    |
| TCONS_00031301 | 0.871924 | -0.682371 | 0.380855   | BGIOSGA036096 | XP_006661852.1 cyanate hydratase                                                         |
| TCONS_00032731 | 0.872027 | 0.65765   | 0.979983   | BGIOSGA017594 | XP_015697447.1 dynamin-related protein 1E-like                                           |
| TCONS_00004795 | 0.872485 | -0.861284 | -0.131461  | BGIOSGA000421 | XP_025983439.1AUGMIN subunit 7                                                           |
| TCONS_00014415 | 0.872585 | 1.27073   | 1.097      | BGIOSGA017773 | XP_021318694.1uncharacterized protein LOC8073555                                         |
| TCONS_00002440 | 0.872652 | 0.813913  | -0.129702  | BGIOSGA005083 | XP_004971106.150S ribosomal protein L27, chloroplastic                                   |
| TCONS_00027966 | 0.873008 | 1.67263   | -0.263957  | BGIOSGA014455 | XP_004979105.11-aminocyclopropane-1-carboxylate oxidase homolog 1                        |
| TCONS_00009113 | 0.873022 | 1.44498   | -0.274068  | BGIOSGA030319 | XP_004966492.1GDSL esterase/lipase At1g71691                                             |
| TCONS_00003594 | 0.873238 | 0.816119  | 0.321522   | BGIOSGA019170 | XP_006644185.1 probable sucrose-phosphatase 1                                            |
| TCONS_00021159 | 0.873331 | 1.62678   | 1.14456    | BGIOSGA030174 | XP_006656314.2 DNA-directed RNA polymerase 3B, chloroplastic-like                        |
| TCONS_00030012 | 0.87343  | 1.90037   | 1.11969    | BGIOSGA029793 | XP_006661206.1 HMG-Y-related protein A-like                                              |
| TCONS_00024604 | 0.873443 | -0.822661 | -1.27632   | BGIOSGA024785 | XP_006657461.1PREDICTED: uncharacterized protein YwkD                                    |
| TCONS_00022046 | 0.873807 | 1.79525   | 0.960005   | BGIOSGA022679 | XP_015693544.1 protein trichome birefringence-like 19                                    |
| TCONS_00010461 | 0.873845 | -1.59515  | 0.00475241 | BGIOSGA035064 | XP_006664981.1 chlorophyll a-b binding protein, chloroplastic                            |
| TCONS_00006829 | 0.874267 | 1.72971   | 0.800912   | BGIOSGA009003 | XP_006649023.1 mitochondrial metalloendopeptidase OMA1                                   |
| TCONS_00001895 | 0.874447 | -1.8071   | 0.19661    | BGIOSGA028790 | XP_015692976.1 copper transporter 2-like                                                 |
| TCONS_00017610 | 0.874668 | 0.586538  | -0.21924   | BGIOSGA036924 | XP_004962393.1pentatricopeptide repeat-containing protein At2g30100, chloroplastic       |
| TCONS_00028065 | 0.87513  | 0.648256  | 0.637125   | BGIOSGA028017 | XP_004972805.160S ribosomal protein L34                                                  |
| TCONS_00026641 | 0.87521  | 1.97539   | 0.117704   | BGIOSGA022508 | XP_015695609.1 protein ODORANT1                                                          |
| TCONS_00015931 | 0.875298 | 0.355559  | 1.69478    | BGIOSGA006480 | XP_004975673.1stress response protein NST1 isoform X2                                    |
| TCONS_00018585 | 0.875597 | 1.40989   | 0.942682   | BGIOSGA018907 | XP_003568974.1hydrophobic protein LTI6B                                                  |
| TCONS_00024676 | 0.875646 | 0.279399  | 1.22342    | BGIOSGA010196 | XP_015694538.1 auxin-responsive protein IAA24-like                                       |
| TCONS_00016739 | 0.876146 | 0.82591   | 0.887912   | BGIOSGA018796 | XP_015691594.1 BRCA1-associated protein-like                                             |
| TCONS_00015385 | 0.876293 | -4.57944  | -2.59405   | BGIOSGA034071 | XP_006653168.2 serine carboxypeptidase-like 18 isoform X1                                |
| TCONS_00022786 | 0.876299 | -1.39418  | 0.481428   | BGIOSGA007588 | XP_015693425.1 CRIB domain-containing protein RIC10-like                                 |
| TCONS_00018751 | 0.87712  | 2.61428   | 0.047765   | BGIOSGA003130 | XP_006654124.1 NADP-dependent malic enzyme, chloroplastic-like                           |
| TCONS_00005989 | 0.877408 | 1.60817   | 1.18333    | BGIOSGA008121 | XP_006648594.2 eukaryotic translation initiation factor 4B3-like                         |
| TCONS_00010651 | 0.87748  | 1.14174   | 0.790448   | BGIOSGA033027 | XP_006650388.1 ras-related protein RABF2b-like                                           |
| TCONS_00006338 | 0.878556 | -1.71682  | -0.433708  | BGIOSGA008501 | XP_003575236.1photosystem II 5 kDa protein, chloroplastic                                |
| TCONS_00031982 | 0.879138 | -0.355523 | 1.10578    | BGIOSGA011366 | XP_015697395.1PREDICTED: uncharacterized protein LOC107305181                            |
| TCONS_00022940 | 0.87937  | 2.1364    | 1.41427    | BGIOSGA005866 | XP_015694207.1 protein LAZ1 isoform X1                                                   |
| TCONS_00012702 | 0.879425 | 0.100413  | 0.238822   | BGIOSGA028888 | XP_003562291.1zinc finger protein 7                                                      |
| TCONS_00008634 | 0.879664 | 0.111833  | 0.315893   | BGIOSGA005793 | XP_015688967.1PREDICTED: uncharacterized protein LOC102701061 isoform X2                 |
| TCONS_00032541 | 0.87968  | 0.120749  | -3.02507   | BGIOSGA004831 | XP_004982643.1protein RESPONSE TO LOW SULFUR 2-like                                      |
| TCONS_00020209 | 0.880861 | 0.74709   | 1.64618    | BGIOSGA022397 | XP_006655840.1 pentatricopeptide repeat-containing protein At5g48730, chloroplastic-like |
| TCONS_00023175 | 0.880894 | 1.5232    | 2.06689    | BGIOSGA035878 | XP_006657483.1 probable glutathione S-transferase GSTU6                                  |
| TCONS_00013149 | 0.880952 | -1.03675  | 0.556549   | BGIOSGA023196 | XP_006650567.1 auxin-responsive protein IAA13                                            |
| TCONS_00017675 | 0.881    | 0.078915  | 0.452509   | BGIOSGA020576 | XP_006654320.1 26S proteasome non-ATPase regulatory subunit 14 homolog                   |
| TCONS_00001700 | 0.881309 | 1.39379   | 1.11682    | BGIOSGA003870 | XP_006644622.1 putative methyltransferase DDB_G0268948                                   |
| TCONS_00002627 | 0.881644 | 1.65979   | 2.42309    | BGIOSGA012316 | XP_003569088.1E3 ubiquitin-protein ligase RDUF2                                          |
| TCONS_00001992 | 0.881704 | 0.594447  | 1.16311    | BGIOSGA004626 | XP_015688269.1 DNA-(apurinic or apyrimidinic site) lyase, chloroplastic-like             |
| TCONS_00022624 | 0.881842 | 0.690488  | 0.90416    | BGIOSGA007960 | XP_015693652.1 protein TIC 21, chloroplastic-like                                        |
| TCONS_00013910 | 0.881966 | -0.401043 | 0.467095   | BGIOSGA016083 | XP_006652156.1 short-chain dehydrogenase TIC 32, chloroplastic-like                      |

## transcriptome

|                |          |                |             |               |                                                                                   |
|----------------|----------|----------------|-------------|---------------|-----------------------------------------------------------------------------------|
| TCONS_00024112 | 0.882933 | -0.277703      | -1.23036    | BGIOSGA018539 | XP_004984090.1F-box only protein 13                                               |
| TCONS_00027376 | 0.88297  | -0.53208       | -1.08925    | BGIOSGA036346 | XP_006659136.1 flavone 3'-O-methyltransferase 1                                   |
| TCONS_00007257 | 0.883142 | 1.08111        | 1.2139      | BGIOSGA021391 | XP_015689222.1 methyltransferase-like protein 16                                  |
| TCONS_00036783 | 0.883499 | 0.406625       | -0.00574705 | BGIOSGA015065 | XP_004977222.1probable L-ascorbate peroxidase 6, chloroplast/mitchondrial         |
| TCONS_00005516 | 0.884202 | 0.506194       | -0.0643081  | BGIOSGA016636 | XP_006646946.2 glyceraldehyde-3-phosphate dehydrogenase GAPCP1, chloroplast-like  |
| TCONS_00021410 | 0.884426 | 1.3034         | 1.15591     | BGIOSGA007252 | XP_006656514.1 catalase isozyme B                                                 |
| TCONS_00002798 | 0.884803 | 0.999096       | 1.17047     | BGIOSGA002415 | NP_001152571.1mitochondrial glycoprotein                                          |
| TCONS_00005097 | 0.885063 | 1.53431        | 0.895904    | BGIOSGA037746 | XP_002459097.1probable calcium-binding protein CML10                              |
| TCONS_00020192 | 0.885421 | 0.330563       | 1.42355     | BGIOSGA026103 | XP_015694433.1 dehydrodolichyl diphosphate synthase 6                             |
| TCONS_00002726 | 0.885836 | -0.30795       | -0.340443   | BGIOSGA003514 | XP_015692350.1PREDICTED: uncharacterized protein LOC102722630, partial            |
| TCONS_00009626 | 0.886669 | -0.636859      | -0.349649   | BGIOSGA012171 | XP_006649671.1PREDICTED: uncharacterized protein LOC102710957                     |
| TCONS_00020356 | 0.886696 | <b>2.61535</b> | 0.69627     | BGIOSGA011934 | XP_010227862.1probable carboxylesterase 12                                        |
| TCONS_00009555 | 0.887381 | 0.67629        | 0.457701    | BGIOSGA012101 | XP_015690427.1 SNAP25 homologous protein SNAP33-like                              |
| TCONS_00035114 | 0.887599 | 1.23239        | 0.259837    | BGIOSGA033758 | XP_003577400.1uncharacterized protein LOC100821647                                |
| TCONS_00006268 | 0.887999 | 1.40167        | 0.943718    | BGIOSGA016465 | XP_006647376.1 protein AIG1-like                                                  |
| TCONS_00019613 | 0.888168 | 1.17609        | 0.692615    | BGIOSGA017743 | XP_006654627.1 outer envelope protein 80, chloroplast                             |
| TCONS_00009267 | 0.888368 | 1.06741        | 1.27212     | BGIOSGA011804 | XP_006649358.1PREDICTED: uncharacterized protein LOC102714711                     |
| TCONS_00027903 | 0.889178 | 0.115214       | 0.159809    | BGIOSGA027098 | XP_003572142.4iron-sulfur assembly protein IscA-like 2, mitchondrial              |
| TCONS_00008265 | 0.889808 | -0.537535      | 0.0548821   | BGIOSGA014619 | XP_004952921.1heavy metal-associated isoprenylated plant protein 47               |
| TCONS_00037600 | 0.88994  | -0.0642687     | 0.164173    | BGIOSGA029665 | XP_003579038.2probable ubiquitin-conjugating enzyme E2 18                         |
| TCONS_00008963 | 0.890236 | 0.85665        | 0.715763    | BGIOSGA002594 | XP_004967927.1protein NCA1                                                        |
| TCONS_00016553 | 0.890471 | -0.127599      | 0.200325    | BGIOSGA005784 | XP_006652762.1 V-type proton ATPase subunit G1-like                               |
| TCONS_00015627 | 0.890719 | 0.427768       | -0.271499   | BGIOSGA000683 | XP_015692400.1 probable protein phosphatase 2C 38                                 |
| TCONS_00030383 | 0.890913 | -0.451929      | 0.266757    | BGIOSGA005915 | XP_004957403.1dehydration-responsive element-binding protein 1A                   |
| TCONS_00029323 | 0.891407 | 1.67441        | 1.46631     | BGIOSGA031067 | XP_006660827.1 cilia- and flagella-associated protein 20                          |
| TCONS_00014854 | 0.891457 | 1.38097        | 1.7486      | BGIOSGA017033 | XP_006653722.1 E3 ubiquitin-protein ligase RNF14-like                             |
| TCONS_00025829 | 0.891476 | 1.31447        | 0.844617    | BGIOSGA027896 | XP_006659069.2 COP9 signalosome complex subunit 3                                 |
| TCONS_00015228 | 0.891843 | 0.0165024      | -0.829262   | BGIOSGA001878 | XP_015691631.1 1-phosphatidylinositol-3-phosphate 5-kinase FAB1B-like             |
| TCONS_00013003 | 0.891894 | -1.95629       | 0.0744347   | BGIOSGA022107 | XP_015690659.1PREDICTED: uncharacterized protein LOC107303889                     |
| TCONS_00023685 | 0.891912 | 1.4516         | 1.21503     | BGIOSGA025715 | XP_015695291.1 uncharacterized Rho GTPase-activating protein At5g61530 isoform X2 |
| TCONS_00022900 | 0.892095 | 1.81186        | 0.248481    | BGIOSGA020543 | XP_006657339.1 protein FMP32, mitchondrial                                        |
| TCONS_00026059 | 0.892169 | -0.160223      | -1.86718    | BGIOSGA028126 | XP_015694828.1 nucleolar protein 58                                               |
| TCONS_00019589 | 0.892243 | 1.12957        | 0.406555    | BGIOSGA004569 | XP_006654610.1 secretory carrier-associated membrane protein 3                    |
| TCONS_00003115 | 0.892898 | -0.640985      | 0.628059    | BGIOSGA002108 | XP_006645644.2 ABC transporter F family member 4-like                             |
| TCONS_00003233 | 0.893018 | 1.53882        | 0.256618    | BGIOSGA001979 | XP_006644005.1 replication protein A 14 kDa subunit                               |
| TCONS_00035297 | 0.893275 | 0.916984       | -0.226163   | BGIOSGA007571 | XP_006663083.1 CASP-like protein 1U2                                              |
| TCONS_00014400 | 0.893808 | 0.206669       | 1.26903     | BGIOSGA016563 | XP_021318613.1L10-interacting MYB domain-containing protein                       |
| TCONS_00028793 | 0.893839 | 0.041504       | 1.94408     | #N/A          | #N/A                                                                              |
| TCONS_00025160 | 0.894217 | 0.469777       | 0.485203    | BGIOSGA024252 | XP_006657736.1 transmembrane protein 184 homolog DDB_G0279555-like                |
| TCONS_00001826 | 0.894751 | -2.98664       | -0.915611   | BGIOSGA018386 | XP_006644709.1 ras-related protein RIC2-like                                      |
| TCONS_00006847 | 0.895051 | 1.12762        | -0.933393   | BGIOSGA009024 | XP_006647867.1PREDICTED: uncharacterized protein LOC102717681                     |
| TCONS_00011008 | 0.896082 | -0.165168      | -0.292015   | BGIOSGA005232 | XP_015690204.1 peroxidase 51-like                                                 |
| TCONS_00035724 | 0.896343 | 0.353278       | 1.20789     | BGIOSGA022215 | XP_015698745.1 probable serine/threonine-protein kinase At1g54610 isoform X1      |
| TCONS_00019349 | 0.896362 | 0.659141       | 0.254591    | BGIOSGA032039 | XP_002441151.1DAR GTPase 3, chloroplast                                           |
| TCONS_00007488 | 0.897575 | 0.165522       | 0.868039    | BGIOSGA023331 | XP_008799157.1 UPF0047 protein YjbQ                                               |
| TCONS_00032764 | 0.897603 | 0.952783       | 0.75818     | BGIOSGA006155 | XP_006662627.1 probable ADP-ribosylation factor GTPase-activating protein AGD8    |
| TCONS_00008309 | 0.898517 | 1.03193        | 1.05545     | BGIOSGA006119 | XP_006647457.1 ultraviolet-B receptor UVR8-like                                   |
| TCONS_00030006 | 0.898581 | -0.82455       | 0.87757     | BGIOSGA031873 | XP_006660609.2 probable cinnamyl alcohol dehydrogenase 8C                         |
| TCONS_00005648 | 0.898597 | 0.091964       | 0.952606    | BGIOSGA007763 | XP_015689282.1 serine/threonine-protein kinase prp4B                              |
| TCONS_00027137 | 0.898718 | 1.86239        | 0.0550776   | BGIOSGA005765 | XP_006659686.1 monodehydroascorbate reductase-like                                |
| TCONS_00016171 | 0.898956 | 0.596435       | 0.881965    | BGIOSGA021329 | XP_004976086.1homeobox protein SIX3 isoform X2                                    |
| TCONS_00034527 | 0.89955  | 2.55629        | 1.2299      | BGIOSGA039627 | XP_015697970.1 putative disease resistance protein RGA4                           |
| TCONS_00033064 | 0.899605 | 0.653518       | 1.52932     | BGIOSGA027732 | XP_015697789.1 E3 ubiquitin-protein ligase CHFR isoform X4                        |
| TCONS_00023427 | 0.899833 | -0.123585      | -0.997608   | BGIOSGA026491 | XP_002459621.2vesicle-associated membrane protein 724                             |

transcriptome

|                |          |           |            |               |                                                                                           |
|----------------|----------|-----------|------------|---------------|-------------------------------------------------------------------------------------------|
| TCONS_00028495 | 0.899882 | 0.299534  | 1.28353    | BGIOSGA026463 | XP_015695884.1 histone-lysine N-methyltransferase family member SUVH9-like                |
| TCONS_00030934 | 0.900703 | -0.380951 | -0.947373  | BGIOSGA032740 | XP_006662283.1 zinc finger protein-like 1                                                 |
| TCONS_00027431 | 0.901027 | 0.781025  | 1.81232    | BGIOSGA005627 | XP_013466991.1cullin 3B                                                                   |
| TCONS_00036650 | 0.901617 | 0.589655  | 0.885444   | BGIOSGA002945 | XP_010238746.1cytochrome P450 90A4                                                        |
| TCONS_00008492 | 0.90164  | -0.266069 | -1.85067   | BGIOSGA005933 | XP_022684399.1embryogenesis-associated protein EMB8                                       |
| TCONS_00005896 | 0.901968 | 0.619011  | 1.43444    | BGIOSGA006624 | XP_022678564.1nicotianamine aminotransferase A isoform X2                                 |
| TCONS_00014106 | 0.901976 | #NA       | 2.55194    | #N/A          | #N/A                                                                                      |
| TCONS_00025703 | 0.90232  | 0.254608  | 0.56772    | BGIOSGA002159 | XP_006658129.1 CBL-interacting protein kinase 2                                           |
| TCONS_00019721 | 0.902774 | -2.96811  | -0.537515  | BGIOSGA004290 | XP_015692951.1PREDICTED: uncharacterized protein LOC107304243                             |
| TCONS_00029344 | 0.903641 | 0.238759  | 1.66978    | BGIOSGA004814 | XP_022679919.1uncharacterized protein C227.17c isoform X2                                 |
| TCONS_00022024 | 0.904256 | 3.31572   | 2.26612    | BGIOSGA021492 | XP_014753035.1uncharacterized protein LOC100837969                                        |
| TCONS_00022538 | 0.905277 | 1.81354   | 1.1496     | BGIOSGA020910 | XP_006657122.1 116 kDa U5 small nuclear ribonucleoprotein component-like                  |
| TCONS_00024267 | 0.905295 | 1.72458   | 0.853884   | BGIOSGA017716 | NP_001310269.1uncharacterized LOC103647908                                                |
| TCONS_00007107 | 0.905593 | 0.427891  | 0.313503   | BGIOSGA009291 | XP_002453036.1tubulin-folding cofactor A                                                  |
| TCONS_00022233 | 0.90591  | 1.5521    | 0.454566   | #N/A          | #N/A                                                                                      |
| TCONS_00022476 | 0.90601  | 2.49502   | 2.51545    | BGIOSGA030840 | XP_006656189.1 probable histone deacetylase 19                                            |
| TCONS_00011720 | 0.90669  | -0.241243 | 0.159974   | BGIOSGA000096 | XP_015690253.1PREDICTED: uncharacterized protein LOC102699480                             |
| TCONS_00012649 | 0.906812 | 0.206424  | -0.36285   | BGIOSGA010321 | XP_006650243.1PREDICTED: uncharacterized protein LOC102711137                             |
| TCONS_00017372 | 0.906815 | 1.02756   | 1.45227    | BGIOSGA011068 | XP_010234256.2uncharacterized protein LOC104583529                                        |
| TCONS_00009367 | 0.907104 | -0.972752 | #NA        | BGIOSGA017343 | XP_004985604.1probable histone H2A variant 1                                              |
| TCONS_00013143 | 0.907793 | 0.841699  | 1.18111    | BGIOSGA009842 | XP_015691290.1PREDICTED: uncharacterized protein LOC102707480                             |
| TCONS_00001404 | 0.90796  | 0.6043    | 1.50701    | BGIOSGA001171 | XP_003566917.1cytochrome P450 72A15                                                       |
| TCONS_00011124 | 0.90807  | 0.854161  | 0.525239   | BGIOSGA023100 | XP_006650726.1 heat stress transcription factor A-2e                                      |
| TCONS_00004574 | 0.908201 | -0.388979 | 0.448761   | BGIOSGA020102 | XP_021313058.1uncharacterized protein LOC8055259                                          |
| TCONS_00022510 | 0.908302 | #NA       | -4.09697   | BGIOSGA003221 | XP_006656201.1 methanol O-anthraniloyltransferase-like                                    |
| TCONS_00014382 | 0.908448 | -2.28898  | 0.793523   | #N/A          | #N/A                                                                                      |
| TCONS_00018125 | 0.908867 | 1.67488   | 1.24909    | BGIOSGA036553 | XP_015692662.1 CBL-interacting protein kinase 19                                          |
| TCONS_00001402 | 0.909049 | 1.14923   | 0.264795   | BGIOSGA001171 | XP_004969235.1cytochrome P450 72A15                                                       |
| TCONS_00019888 | 0.909444 | 0.346625  | 0.0305777  | #N/A          | #N/A                                                                                      |
| TCONS_00011607 | 0.90967  | 0.856065  | 0.346951   | #N/A          | #N/A                                                                                      |
| TCONS_00029392 | 0.910372 | 1.03315   | 0.603896   | BGIOSGA031144 | XP_006660887.2.pantothenate kinase 2                                                      |
| TCONS_00020039 | 0.910657 | 1.86755   | 1.96447    | BGIOSGA030508 | XP_002436388.1nuclear speckle RNA-binding protein A                                       |
| TCONS_00036537 | 0.910943 | -2.31395  | -0.806432  | BGIOSGA003354 | XP_006662656.1 probable receptor-like protein kinase At5g18500                            |
| TCONS_00017485 | 0.911109 | -0.688695 | -1.01161   | BGIOSGA037390 | XP_006654233.1 high-light-induced protein, chloroplastic                                  |
| TCONS_00036120 | 0.913102 | 0.134632  | 0.0803925  | BGIOSGA037480 | XP_015698598.1PREDICTED: uncharacterized protein LOC107305428                             |
| TCONS_00002556 | 0.913307 | -2.61203  | -0.0749559 | BGIOSGA011489 | XP_015690813.1 splicing factor U2af large subunit B-like                                  |
| TCONS_00012991 | 0.91347  | 0.827461  | 0.373992   | BGIOSGA010000 | NP_001130854.1uncharacterized LOC100191958                                                |
| TCONS_00018629 | 0.91347  | 2.26803   | 2.1672     | #N/A          | #N/A                                                                                      |
| TCONS_00021889 | 0.913605 | 2.58812   | 2.14496    | BGIOSGA021634 | XP_006655927.1PREDICTED: uncharacterized protein LOC102721085                             |
| TCONS_00018917 | 0.914256 | 2.18568   | 1.2606     | BGIOSGA001006 | XP_006654194.1 xylanase inhibitor protein 2-like                                          |
| TCONS_00001998 | 0.914484 | -0.261068 | 0.0565052  | BGIOSGA001916 | XP_006644859.1 cysteine proteinase inhibitor 1                                            |
| TCONS_00024979 | 0.914494 | 0.826248  | 1.01775    | BGIOSGA000239 | XP_022679495.1probable alpha-1,6-mannosyltransferase MNN10 isoform X1                     |
| TCONS_00033802 | 0.914746 | -0.366114 | 0.358918   | BGIOSGA000885 | XP_015697825.1 receptor expression-enhancing protein 3-B-like                             |
| TCONS_00023526 | 0.915153 | 1.9567    | 1.65351    | BGIOSGA025559 | XP_006664801.1 adenylate kinase isoenzyme 6 homolog                                       |
| TCONS_00009531 | 0.915367 | 0.0178191 | 0.999737   | BGIOSGA012078 | XP_003558542.1probable E3 ubiquitin-protein ligase RHY1A                                  |
| TCONS_00001769 | 0.915402 | 0.0178024 | 0.430491   | BGIOSGA017691 | XP_003569741.1uncharacterized protein LOC100841435                                        |
| TCONS_00016979 | 0.915666 | 0.363624  | -0.29584   | BGIOSGA005265 | XP_006653959.1 cytochrome b5                                                              |
| TCONS_00008790 | 0.916102 | -1.98305  | 0.487617   | BGIOSGA031952 | XP_015689053.1PREDICTED: uncharacterized protein LOC102702077 isoform X1                  |
| TCONS_00006570 | 0.916279 | 1.04673   | 0.738783   | BGIOSGA014144 | XP_006647623.1 ubiquitin carboxyl-terminal hydrolase 3-like                               |
| TCONS_00019206 | 0.91634  | 1.05563   | 0.509935   | BGIOSGA000106 | XP_006654342.1 mitochondrial fission 1 protein A-like                                     |
| TCONS_00015843 | 0.917027 | 0.111653  | 0.133811   | BGIOSGA015143 | XP_006652250.1 DNA-binding protein S1FA2                                                  |
| TCONS_00035778 | 0.917334 | 0.342828  | 0.145996   | BGIOSGA036379 | XP_006663937.1 cystinosin homolog                                                         |
| TCONS_00015770 | 0.917411 | #NA       | -2.15954   | BGIOSGA029163 | XP_006652208.1PREDICTED: uncharacterized protein LOC102709832                             |
| TCONS_00004669 | 0.917505 | 1.61358   | 0.744296   | BGIOSGA020007 | XP_004970462.1carboxy-terminal domain RNA polymerase II polypeptide A small phosphatase 1 |
| TCONS_00037539 | 0.918099 | -1.98551  | 0.00865216 | BGIOSGA024803 | XP_004964201.1protein LATE FLOWERING                                                      |
| TCONS_00007270 | 0.918125 | 0.293399  | -0.236549  | BGIOSGA007213 | XP_006646813.1 probable CDP-diacylglycerol--inositol 3-phosphatidytransferase 2           |



## transcriptome

|                |          |            |            |               |                                                                                    |
|----------------|----------|------------|------------|---------------|------------------------------------------------------------------------------------|
| TCONS_00025711 | 0.918436 | 1.90226    | 0.740568   | BGIOSGA023421 | XP_006658133.1 vacuolar-sorting receptor 1-like                                    |
| TCONS_00016291 | 0.918567 | -1.1381    | 0.560014   | BGIOSGA014680 | XP_006652540.1 GEM-like protein 4                                                  |
| TCONS_00000686 | 0.91866  | 0.684432   | 0.585618   | BGIOSGA023828 | XP_006644073.1 gamma carbonic anhydrase 1, mitochondrial                           |
| TCONS_00007278 | 0.918706 | 0.463055   | 1.0015     | BGIOSGA027990 | XP_006646822.1 small nuclear ribonucleoprotein E-like                              |
| TCONS_00027368 | 0.919482 | 0.647487   | 1.25383    | BGIOSGA016665 | XP_006659128.1 DNA-directed RNA polymerase II subunit 1                            |
| TCONS_00028328 | 0.919648 | 0.61015    | 2.1189     | BGIOSGA032895 | XP_002445877.1 chitinase-like protein 1                                            |
| TCONS_00031513 | 0.920333 | -0.159441  | -0.0354357 | BGIOSGA024085 | XP_002465034.1 probable glutathione S-transferase GSTU6                            |
| TCONS_00000727 | 0.920463 | 0.950604   | 1.39636    | BGIOSGA032536 | XP_006644099.2 PREDICTED: uncharacterized protein LOC102722988                     |
| TCONS_00018703 | 0.92069  | 0.612856   | -0.0220254 | BGIOSGA032330 | NP_001151326.1 uvrB/uvrC motif family protein                                      |
| TCONS_00013847 | 0.92069  | -1.98878   | -0.582819  | #N/A          | #N/A                                                                               |
| TCONS_00025467 | 0.921328 | 1.18034    | 2.32248    | BGIOSGA025814 | XP_004957834.1 ankryrin repeat domain-containing protein 13B                       |
| TCONS_00016030 | 0.921446 | 1.02438    | 0.672409   | BGIOSGA006178 | XP_003575233.1 cellulose synthase-like protein D2                                  |
| TCONS_00013456 | 0.921535 | -1.66792   | -1.263     | BGIOSGA012378 | XP_006649895.1 PREDICTED: uncharacterized protein LOC102703849                     |
| TCONS_00027055 | 0.921654 | 1.54605    | 0.950827   | BGIOSGA031107 | XP_006660351.1 transcription factor RF2a-like                                      |
| TCONS_00025383 | 0.921731 | -1.9901    | -0.585419  | BGIOSGA024049 | XP_003562904.1 fatty-acid-binding protein 1                                        |
| TCONS_00028056 | 0.922041 | 0.612197   | 0.807801   | BGIOSGA026933 | XP_002445546.1 uncharacterized endoplasmic reticulum membrane protein YGL010W      |
| TCONS_00006752 | 0.922202 | 0.829918   | 0.320673   | BGIOSGA023188 | XP_004953688.1 outer envelope membrane protein 7                                   |
| TCONS_00037546 | 0.922932 | 0.330313   | -1.58841   | BGIOSGA010142 | XP_015698542.1 nuclear transcription factor Y subunit A-10-like                    |
| TCONS_00025427 | 0.92296  | -1.1843    | 1.05538    | BGIOSGA003415 | XP_006657897.1 GDSL esterase/lipase At3g26430-like                                 |
| TCONS_00021203 | 0.923222 | 0.762907   | 0.732796   | BGIOSGA028279 | XP_015693963.1 myb family transcription factor APL-like                            |
| TCONS_00028377 | 0.923369 | 0.693637   | 0.472627   | BGIOSGA029471 | XP_006659626.1 transmembrane emp24 domain-containing protein p24beta2-like         |
| TCONS_00031344 | 0.923737 | 0.104084   | 0.955753   | BGIOSGA033158 | XP_006661880.1 PREDICTED: uncharacterized protein YpgQ                             |
| TCONS_00000812 | 0.923836 | 0.707684   | 0.868773   | BGIOSGA014038 | XP_006644128.1 peroxidase 1-like                                                   |
| TCONS_00015129 | 0.92409  | 1.26778    | 1.1683     | BGIOSGA017308 | XP_015691814.1 PREDICTED: uncharacterized protein LOC102701814                     |
| TCONS_00028105 | 0.924516 | -0.182052  | 1.59704    | BGIOSGA029700 | XP_006662238.1 AT-rich interactive domain-containing protein 4-like                |
| TCONS_00035062 | 0.924796 | 1.25396    | 1.75273    | BGIOSGA030484 | XP_006663533.1 cell division cycle-associated 7-like protein                       |
| TCONS_00008051 | 0.924817 | 0.370366   | 1.04203    | BGIOSGA015197 | XP_002447708.1 U6 snRNA-associated Sm-like protein LSm6                            |
| TCONS_00021790 | 0.924839 | 1.70642    | 1.61631    | BGIOSGA006950 | XP_015694384.1 3-oxoacyl-[acyl-carrier-protein] synthase I, chloroplast-like       |
| TCONS_00028854 | 0.924881 | 0.706369   | 1.57668    | BGIOSGA030602 | XP_015696698.1 putative hydrolase C777.06c                                         |
| TCONS_00013262 | 0.925386 | 3.39761    | 2.33624    | BGIOSGA009725 | XP_006650673.1 protein JASON-like                                                  |
| TCONS_00028644 | 0.925692 | 1.58987    | 0.831008   | BGIOSGA039660 | YP_762326.1 ATPase subunit 1 (mitochondrion)                                       |
| TCONS_00003082 | 0.925721 | 4.31473    | 1.90717    | BGIOSGA002141 | XP_006645627.1 cytochrome P450 710A1-like                                          |
| TCONS_00023702 | 0.925812 | 0.352696   | 0.564536   | BGIOSGA025741 | XP_006657720.1 probable (S)-ureidoglycine aminohydrolase                           |
| TCONS_00009264 | 0.92583  | 1.18531    | 1.45171    | BGIOSGA011801 | XP_015698036.1 DNA-directed RNA polymerase I subunit rpa49                         |
| TCONS_00017547 | 0.925839 | 1.43124    | 1.32345    | BGIOSGA019250 | XP_004962450.1 probable WRKY transcription factor 70                               |
| TCONS_00007697 | 0.926396 | 1.05135    | -0.124199  | BGIOSGA012812 | XP_015688539.1 RING-H2 finger protein ATL39-like                                   |
| TCONS_00021020 | 0.926545 | -0.0818916 | 1.85195    | BGIOSGA023252 | XP_004965907.1 serine/arginine repetitive matrix protein 2                         |
| TCONS_00004582 | 0.926861 | 0.24513    | 0.767929   | BGIOSGA021882 | XP_015699233.1 PREDICTED: uncharacterized protein LOC102716174                     |
| TCONS_00002430 | 0.926918 | 1.06082    | 2.22081    | BGIOSGA005073 | XP_006646622.1 probable mitochondrial import receptor subunit TOM20                |
| TCONS_00009458 | 0.927234 | 1.14907    | 0.706688   | BGIOSGA010396 | XP_012704214.1 vacuolar protein-sorting-associated protein 37 homolog 1 isoform X1 |
| TCONS_00022284 | 0.927403 | -0.250922  | -1.19591   | BGIOSGA021202 | XP_021305782.1 uncharacterized protein LOC110431243                                |
| TCONS_00005192 | 0.927487 | -3.04463   | -1.43782   | BGIOSGA019042 | XP_006645404.1 pectin acetyltransferase 5-like                                     |
| TCONS_00031510 | 0.927591 | 1.731      | -0.0152762 | BGIOSGA000988 | XP_010234937.1 probable glutathione S-transferase GSTU6                            |
| TCONS_00014701 | 0.928551 | -1.19132   | 0.524747   | BGIOSGA016875 | XP_006652604.1 nudix hydrolase 8-like                                              |
| TCONS_00008897 | 0.928942 | 1.8532     | 1.18513    | BGIOSGA038929 | XP_006647988.1 heat shock 70 kDa protein, mitochondrial                            |
| TCONS_00023665 | 0.929747 | 0.894545   | 0.659147   | BGIOSGA025690 | XP_006657693.1 mannosyl-PP-dolichol utilization defect 1 protein homolog 2         |
| TCONS_00007747 | 0.930385 | 0.487121   | 0.887288   | BGIOSGA006735 | XP_006647141.1 protein CbxX, chromosomal                                           |
| TCONS_00028185 | 0.930427 | 0.309364   | -0.957089  | BGIOSGA026800 | XP_004973706.1 mitochondrial uncoupling protein 5                                  |
| TCONS_00003319 | 0.931072 | 1.24319    | 0.885169   | BGIOSGA010821 | XP_006645766.1 phospholipid-transporting ATPase 1-like                             |
| TCONS_00015967 | 0.932188 | 1.5389     | 2.07963    | BGIOSGA015012 | XP_015691721.1 3-oxoacyl-[acyl-carrier-protein] synthase I, chloroplast-like       |
| TCONS_00019769 | 0.933746 | 1.82325    | 1.77153    | BGIOSGA002067 | XP_006654769.1 50S ribosomal protein L21, mitochondrial                            |
| TCONS_00009364 | 0.934037 | 0.667641   | -0.0591612 | BGIOSGA016156 | XP_006649438.1 1,2-dihydroxy-3-keto-5-methylthiopentene dioxigenase 2              |
| TCONS_00011233 | 0.934104 | 0.634203   | 0.604168   | BGIOSGA014576 | XP_006650806.1 actin-depolymerizing factor 4                                       |
| TCONS_00008503 | 0.93481  | -0.0707986 | -0.536465  | BGIOSGA005925 | XP_020394218.1 cyclin-P4-1                                                         |
| TCONS_00017223 | 0.9356   | -0.335661  | -0.275297  | BGIOSGA011209 | XP_006654098.2 PREDICTED: uncharacterized protein LOC102708154 isoform X2          |

transcriptome

|                |          |           |            |               |                                                                                       |
|----------------|----------|-----------|------------|---------------|---------------------------------------------------------------------------------------|
| TCONS_00010341 | 0.935707 | 2.5442    | 1.34816    | BGIOSGA007016 | XP_004983984.1 chaperone protein ClpB2, chloroplastic                                 |
| TCONS_00008668 | 0.93574  | -1.35864  | 0.169383   | BGIOSGA007272 | XP_004953634.1 protein KINESIN LIGHT CHAIN-RELATED 2                                  |
| TCONS_00014652 | 0.935761 | 0.739065  | 0.895238   | BGIOSGA016814 | XP_006652560.1 tRNA-dihydrouridine(20) synthase [NAD(P)+]-like                        |
| TCONS_00012861 | 0.935951 | 1.03338   | 0.225651   | BGIOSGA010115 | XP_022679162.1 uncharacterized protein LOC101755397                                   |
| TCONS_00020528 | 0.935991 | 0.587886  | 1.25126    | BGIOSGA022703 | XP_006656883.2 PREDICTED: uncharacterized protein LOC102709185, partial               |
| TCONS_00018636 | 0.936335 | 0.282129  | 0.157294   | BGIOSGA021330 | XP_004960278.11-aminocyclopropane-1-carboxylate oxidase                               |
| TCONS_00006553 | 0.936651 | -1.83743  | -0.0666383 | BGIOSGA014634 | XP_006647606.2 aldehyde dehydrogenase family 3 member F1-like                         |
| TCONS_00030237 | 0.936842 | 1.35702   | 1.64696    | BGIOSGA031963 | XP_004973824.2 heat shock protein 81-1                                                |
| TCONS_00016516 | 0.936946 | 1.36745   | 1.11813    | BGIOSGA014452 | XP_006652723.1 31 kDa ribonucleoprotein, chloroplastic-like                           |
| TCONS_00001887 | 0.937632 | 0.916691  | 1.10308    | BGIOSGA004521 | XP_015690006.1 DEXH-box ATP-dependent RNA helicase DEXH6                              |
| TCONS_00001467 | 0.937776 | 0.872956  | 0.168685   | BGIOSGA004105 | XP_003569454.1 transcription initiation factor TFIID subunit 7                        |
| TCONS_00002832 | 0.938101 | 0.648059  | 0.562851   | BGIOSGA002387 | XP_006643760.1 very-long-chain enoyl-CoA reductase                                    |
| TCONS_00019696 | 0.938501 | 0.467333  | 0.717636   | BGIOSGA017665 | XP_006654706.1 PREDICTED: uncharacterized protein LOC102722771                        |
| TCONS_00015934 | 0.938851 | 1.2683    | 1.00155    | BGIOSGA006480 | XP_004975673.1 stress response protein NST1 isoform X2                                |
| TCONS_00018388 | 0.93906  | -0.172029 | -0.701921  | BGIOSGA004162 | XP_006654845.1 mitogen-activated protein kinase 9                                     |
| TCONS_00025284 | 0.939234 | 0.698336  | 1.51073    | BGIOSGA000326 | XP_006658666.2 formin-like protein 11                                                 |
| TCONS_00014341 | 0.939734 | -0.467462 | -0.200924  | BGIOSGA016501 | XP_015691478.1 zeaxanthin epoxidase, chloroplastic                                    |
| TCONS_00009285 | 0.94047  | -0.925233 | 0.541203   | BGIOSGA004822 | XP_006651022.1 cytochrome P450 86B1-like                                              |
| TCONS_00014567 | 0.940515 | -4.6577   | 0.742481   | BGIOSGA024730 | XP_006653579.1 PREDICTED: uncharacterized protein At4g06744-like                      |
| TCONS_00008426 | 0.940716 | 2.0353    | 0.332837   | BGIOSGA027531 | XP_005646670.1 ubiquitin-like protein                                                 |
| TCONS_00008451 | 0.940917 | 0.64324   | 1.54947    | BGIOSGA038588 | XP_015688951.1 F-box/LRR-repeat protein 2                                             |
| TCONS_00006483 | 0.941133 | 0.601223  | 1.79058    | BGIOSGA016517 | XP_006647540.1 cryptochrome-1                                                         |
| TCONS_00004641 | 0.941209 | #NA       | 1.44795    | BGIOSGA036880 | XP_006644921.1 non-specific lipid-transfer protein 1-like                             |
| TCONS_00031750 | 0.941295 | 1.04729   | 1.60905    | BGIOSGA032368 | XP_015697349.1 probable ascorbate-specific transmembrane electron transporter 1       |
| TCONS_00025528 | 0.942084 | -0.41069  | 0.366583   | BGIOSGA037590 | XP_006658815.2 DNA-directed RNA polymerases II, IV and V subunit 9A-like              |
| TCONS_00009909 | 0.943067 | -0.428337 | 0.365128   | BGIOSGA028991 | XP_015689870.1 calvin cycle protein CP12-1, chloroplastic-like                        |
| TCONS_00019853 | 0.9432   | 0.982205  | 1.15491    | BGIOSGA004099 | XP_003567840.1 uncharacterized protein LOC100830726                                   |
| TCONS_00014794 | 0.943269 | 0.289803  | 1.89647    | BGIOSGA016964 | XP_002451498.2 uncharacterized protein LOC8057530                                     |
| TCONS_00036219 | 0.943366 | 1.0754    | 1.14231    | BGIOSGA037576 | XP_015698823.1 protein DEHYDRATION-INDUCED 19 homolog 4-like isoform X2               |
| TCONS_00033177 | 0.943417 | 0.583575  | -0.0122211 | BGIOSGA035012 | XP_006662829.1 methylthioribose-1-phosphate isomerase                                 |
| TCONS_00017258 | 0.94368  | 0.571817  | 0.698704   | BGIOSGA019302 | XP_006647264.1 proteasome subunit beta type-7-A-like                                  |
| TCONS_00014882 | 0.944934 | 0.828306  | 0.480161   | BGIOSGA017059 | XP_002468559.1 probable protein-S-isoprenylcysteine O-methyltransferase               |
| TCONS_00015412 | 0.94547  | -0.441833 | 0.752992   | BGIOSGA015961 | XP_006652110.1 PREDICTED: uncharacterized protein LOC102699580                        |
| TCONS_00002638 | 0.945591 | -3.68343  | -1.60192   | #N/A          | #N/A                                                                                  |
| TCONS_00008983 | 0.945701 | 0.868278  | 0.602383   | BGIOSGA013021 | XP_006650279.1 cyclin-B1-2                                                            |
| TCONS_00015134 | 0.946069 | -0.986818 | -0.107773  | BGIOSGA017314 | XP_006653857.1 probable plastid-lipid-associated protein 13, chloroplastic            |
| TCONS_00009089 | 0.946188 | 0.179497  | 0.725359   | BGIOSGA005314 | XP_002454840.1 protein BRICK1                                                         |
| TCONS_00032425 | 0.946788 | 0.893947  | 0.798353   | BGIOSGA028831 | XP_006662441.2 pentatricopeptide repeat-containing protein At1g08610-like             |
| TCONS_00036374 | 0.946887 | -0.622518 | 1.03581    | BGIOSGA037740 | XP_006664714.2 putative uridine kinase C227.14 isoform X2                             |
| TCONS_00019247 | 0.947118 | 1.16914   | 0.794502   | BGIOSGA018101 | XP_015692590.1 probable E3 ubiquitin-protein ligase LUL3                              |
| TCONS_00022851 | 0.947658 | -0.420887 | 0.731324   | BGIOSGA036884 | XP_006656438.1 macrophage migration inhibitory factor homolog                         |
| TCONS_00025110 | 0.947989 | 1.0687    | 1.36475    | BGIOSGA025722 | XP_015695325.1 peptidyl-prolyl cis-trans isomerase FKBP20-2, chloroplastic isoform X1 |
| TCONS_00005624 | 0.948031 | 0.275807  | -0.509352  | BGIOSGA020905 | XP_006647029.1 probable calcium-binding protein CML21                                 |
| TCONS_00008330 | 0.948693 | 1.38006   | 1.33125    | BGIOSGA005936 | XP_006648819.1 leucine-rich repeat receptor-like protein FASCIATED EAR2               |
| TCONS_00012545 | 0.948955 | 2.38316   | 1.14041    | BGIOSGA010435 | NP_001143046.1 uncharacterized protein LOC100275514                                   |
| TCONS_00034317 | 0.949019 | 1.16236   | -1.07485   | BGIOSGA003738 | XP_006663217.1 purple acid phosphatase 22-like                                        |
| TCONS_00021057 | 0.949398 | 2.11325   | 1.10816    | BGIOSGA011119 | XP_010227491.1 brefeldin A-inhibited guanine nucleotide-exchange protein 1            |
| TCONS_00023903 | 0.950111 | 0.737894  | 1.5486     | BGIOSGA027969 | XP_006658690.1 vesicle-associated protein 4-2-like                                    |
| TCONS_00003295 | 0.950172 | 1.43231   | 0.719117   | BGIOSGA021869 | XP_006644040.1 putative disease resistance RPP13-like protein 3                       |
| TCONS_00009315 | 0.950575 | 2.50108   | 0.910577   | BGIOSGA020776 | XP_010907453.1 cyclin-dependent kinases regulatory subunit 1                          |
| TCONS_00022675 | 0.950902 | 0.179067  | 0.483471   | BGIOSGA008554 | XP_006656312.1 probable protein phosphatase 2C 58                                     |
| TCONS_00022213 | 0.952248 | 0.145063  | 1.91646    | BGIOSGA021288 | XP_015694012.1 translation initiation factor IF-2-like                                |

## transcriptome

|                |          |             |            |               |                                                                                                  |
|----------------|----------|-------------|------------|---------------|--------------------------------------------------------------------------------------------------|
| TCONS_00035589 | 0.952279 | -4.72956    | -0.239848  | BGIOSGA037009 | NP_001140569.1 uncharacterized LOC100272635                                                      |
| TCONS_00024107 | 0.952416 | 0.462772    | 0.314521   | BGIOSGA025502 | XP_020396116.1 senescence-associated-like protein isoform X1                                     |
| TCONS_00012201 | 0.952763 | 0.559088    | -0.435851  | BGIOSGA006084 | XP_006650031.1 probable calcium-binding protein CML27                                            |
| TCONS_00019845 | 0.952998 | -0.600915   | -0.709219  | BGIOSGA009118 | XP_006655615.2 PREDICTED: uncharacterized protein LOC102715763                                   |
| TCONS_00010686 | 0.954523 | -0.0689284  | 0.481563   | BGIOSGA013310 | NP_001341858.1 uncharacterized protein LOC100502302                                              |
| TCONS_00007882 | 0.955791 | 0.559629    | 1.01177    | BGIOSGA027495 | XP_006647223.1 putative F-box/LRR-repeat protein 23                                              |
| TCONS_00025018 | 0.956044 | 1.96534     | 2.53003    | #N/A          | #N/A                                                                                             |
| TCONS_00001670 | 0.956231 | 1.2343      | 1.62553    | BGIOSGA007822 | XP_006644595.1 mitochondrial substrate carrier family protein P-like                             |
| TCONS_00016923 | 0.956569 | -0.960726   | 1.61092    | BGIOSGA003397 | XP_006653070.1 cationic peroxidase SPC4-like                                                     |
| TCONS_00010908 | 0.956619 | 0.997567    | 1.40061    | BGIOSGA013521 | XP_006651796.1 cyclin-H1-1 isoform X1                                                            |
| TCONS_00032952 | 0.956684 | 1.52239     | 0.55852    | BGIOSGA013519 | XP_015697554.1 protein TRAUCCO-like                                                              |
| TCONS_00037189 | 0.956737 | 0.46031     | 1.00905    | BGIOSGA001838 | XP_006644093.1 probable tRNA N6-adenosine threonylcarbamoyltransferase, mitochondrial isoform X1 |
| TCONS_00007857 | 0.956854 | 1.92371     | 1.11294    | BGIOSGA006623 | XP_006647199.2 PREDICTED: uncharacterized protein LOC102711771                                   |
| TCONS_00004909 | 0.957178 | 0.490362    | -0.294908  | BGIOSGA016638 | XP_006645184.1 uncharacterized membrane protein YuiD-like                                        |
| TCONS_00006242 | 0.957748 | 0.323661    | 1.10287    | BGIOSGA000276 | XP_021310923.1 coleoptile phototropism protein 1                                                 |
| TCONS_00006099 | 0.95841  | -0.82171    | -0.349938  | BGIOSGA008254 | XP_006647282.1 ethylene-responsive transcription factor-like protein At4g13040                   |
| TCONS_00016908 | 0.958501 | 1.3483      | 1.87116    | BGIOSGA028654 | XP_015691624.1 PREDICTED: uncharacterized protein LOC102713185                                   |
| TCONS_00029880 | 0.958803 | 0.148539    | 1.07978    | BGIOSGA029938 | XP_006660559.1 protein SAWADEE                                                                   |
| TCONS_00007533 | 0.958872 | 0.706525    | 1.33294    | BGIOSGA006951 | HOMEODOMAIN HOMOLOG 1 isoform X2                                                                 |
| TCONS_00016394 | 0.959056 | 1.56873     | 1.36214    | BGIOSGA003738 | XP_006647024.1 fumarylacetoacetase                                                               |
| TCONS_00012875 | 0.95971  | 1.1832      | 1.19886    | BGIOSGA033514 | XP_006652626.1 cis-zeatin O-glucosyltransferase 1-like                                           |
| TCONS_00007410 | 0.959976 | 1.83494     | 1.65762    | BGIOSGA012222 | XP_008644626.1 protein P21                                                                       |
| TCONS_00013824 | 0.960104 | 1.44598     | 1.45072    | BGIOSGA016000 | XP_008659894.1 probable transcription factor KAN4                                                |
| TCONS_00009886 | 0.961164 | 0.552372    | 0.0431992  | BGIOSGA012440 | XP_006652132.1 prostaglandin E synthase 2                                                        |
| TCONS_00021319 | 0.961395 | 0.767887    | -0.546398  | BGIOSGA007536 | XP_015689863.1 pentatricopeptide repeat-containing protein At5g50990-like                        |
| TCONS_00009206 | 0.961596 | 0.214427    | 0.883485   | BGIOSGA025915 | XP_015693696.1 protein CHLOROPLAST IMPORT APPARATUS 2                                            |
| TCONS_00022132 | 0.962042 | -0.536571   | 0.650879   | BGIOSGA023257 | XP_010504143.1 histone H4                                                                        |
| TCONS_00014159 | 0.962177 | 0.787758    | 0.362604   | BGIOSGA014605 | XP_006656018.1 65-kDa microtubule-associated protein 1                                           |
| TCONS_00030446 | 0.962801 | 0.660474    | -0.0607915 | BGIOSGA036399 | XP_010239814.1 ethylene-responsive transcription factor ERF113                                   |
| TCONS_00031668 | 0.963399 | 1.97678     | 1.9677     | BGIOSGA034489 | XP_006660909.1 acyl carrier protein 2, chloroplastic-like                                        |
| TCONS_00023254 | 0.963447 | 1.85359     | 1.12051    | BGIOSGA005583 | XP_006662091.1 plant intracellular Ras-group-related LRR protein 5                               |
| TCONS_00023688 | 0.963574 | 1.76327     | 1.58151    | BGIOSGA024287 | NP_001152028.2 nitrate and chloride transporter                                                  |
| TCONS_00015567 | 0.964229 | 2.0859      | 2.15707    | BGIOSGA018401 | XP_003563089.1 ubiquinol-cytochrome-c reductase complex assembly factor 1                        |
| TCONS_00022904 | 0.964235 | 1.37317     | 0.423268   | BGIOSGA026583 | XP_015691799.1 probable ribonuclease P/MRP protein subunit POP5 isoform X2                       |
| TCONS_00014593 | 0.964464 | -0.179645   | 0.697886   | BGIOSGA016753 | XP_006656485.1 auxin-responsive protein SAUR32-like                                              |
| TCONS_00010018 | 0.964619 | 2.66732     | 0.646032   | BGIOSGA030346 | XP_004976208.1 protein disulfide isomerase pTACS, chloroplastic                                  |
| TCONS_00013633 | 0.964651 | -1.3676     | 1.0737     | BGIOSGA006114 | XP_004984468.1 probable WRKY transcription factor 70 isoform X2                                  |
| TCONS_00011379 | 0.964834 | -6.29345    | -0.501952  | BGIOSGA013992 | XP_006652079.1 very-long-chain 3-oxoacyl-CoA reductase 1-like                                    |
| TCONS_00022221 | 0.964898 | 0.975572    | 1.71709    | BGIOSGA025411 | XP_006652054.2 PREDICTED: uncharacterized protein LOC102717512                                   |
| TCONS_00029540 | 0.965247 | 1.07561     | -0.0212168 | BGIOSGA031299 | XP_015693586.1 xylanase inhibitor protein 1-like                                                 |
| TCONS_00018193 | 0.965256 | 0.000872148 | -0.0759151 | BGIOSGA034398 | XP_006660999.1 sugar phosphatase YfbT-like                                                       |
| TCONS_00008904 | 0.96579  | 0.747426    | 1.21175    | #N/A          | XP_002440134.1 uncharacterized protein LOC8068977 isoform X1                                     |
| TCONS_00019984 | 0.966334 | 1.24195     | 1.70591    | BGIOSGA003633 | #N/A                                                                                             |
| TCONS_00013157 | 0.966959 | 0.684889    | 0.978769   | BGIOSGA037096 | XP_015692289.1 pentatricopeptide repeat-containing protein At1g11290, chloroplastic              |
| TCONS_00019079 | 0.967096 | -0.00727882 | 0.184222   | BGIOSGA018281 | NP_001141300.1 suppressor/enhancer of lin-12 protein 9 precursor                                 |
| TCONS_00032296 | 0.967452 | 0.588468    | 1.86609    | BGIOSGA031838 | XP_006654268.1 proactivator polypeptide-like 1 isoform X1                                        |
| TCONS_00004723 | 0.967513 | 1.48148     | 2.62238    | BGIOSGA011319 | XP_006661798.1 phosphoglycerate kinase-like                                                      |
| TCONS_00000574 | 0.968798 | 1.20052     | 0.656847   | BGIOSGA019540 | XP_006646479.1 pentatricopeptide repeat-containing protein At3g46790, chloroplastic              |
| TCONS_00035584 | 0.969862 | 0.385998    | 1.01053    | BGIOSGA006196 | XP_006645714.1 E3 ubiquitin-protein ligase hel2                                                  |
| TCONS_00023270 | 0.970099 | 1.57659     | 0.861269   | BGIOSGA013749 | XP_006663819.1 protein BUD31 homolog 3                                                           |
| TCONS_00009959 | 0.971214 | 2.03665     | 1.11052    | BGIOSGA012511 | XP_008670937.1 pentatricopeptide repeat-containing protein At1g59720,                            |
| TCONS_00023206 | 0.971579 | 1.06559     | 0.823294   | BGIOSGA012151 | chloroplastic/mitochondrial                                                                      |
| TCONS_00011211 | 0.97184  | 1.30406     | 1.10156    | BGIOSGA035136 | XP_009384967.1 sigma factor binding protein 1, chloroplastic-like                                |
| TCONS_00034096 | 0.972073 | 0.211797    | -0.354462  | BGIOSGA037630 | XP_004955620.1 heat stress transcription factor A-2b                                             |
|                |          |             |            |               | XP_006650788.1 50S ribosomal protein L17                                                         |
|                |          |             |            |               | XP_004980075.1 metallothionein-like protein 1A                                                   |

transcriptome

|                |          |            |              |               |                                                                                            |
|----------------|----------|------------|--------------|---------------|--------------------------------------------------------------------------------------------|
| TCONS_0000806  | 0.972318 | -0.693448  | -0.457531    | BGIOSGA033399 | XP_006645835.1 peroxidase 1-like                                                           |
| TCONS_0002278  | 0.972529 | 1.31357    | 1.58816      | BGIOSGA021214 | XP_006656099.1 G patch domain-containing protein TGH homolog                               |
| TCONS_00032656 | 0.972745 | 0.71303    | 1.00576      | BGIOSGA031451 | XP_015698309.1 PREDICTED: uncharacterized protein LOC102708114, partial                    |
| TCONS_00001046 | 0.973223 | 1.83592    | -0.000360126 | BGIOSGA003653 | XP_015693243.1 PREDICTED: uncharacterized protein LOC102715308                             |
| TCONS_00011903 | 0.973513 | 1.39147    | 1.1962       | BGIOSGA029874 | XP_003558351.1 enolase 2                                                                   |
| TCONS_00010272 | 0.973797 | 0.973531   | 0.817807     | BGIOSGA012837 | XP_015689931.1 probable nucleoredoxin 1-2                                                  |
| TCONS_00016038 | 0.97429  | 1.93759    | 0.851981     | #N/A          | #N/A                                                                                       |
| TCONS_00036695 | 0.974646 | 1.61528    | #NA          | BGIOSGA030709 | XP_006663825.1 PREDICTED: uncharacterized protein LOC102705767                             |
| TCONS_00000323 | 0.974676 | 0.479421   | 0.16108      | BGIOSGA000911 | XP_006643841.1 probable choline kinase 2                                                   |
| TCONS_00031690 | 0.975302 | -0.625133  | -0.0120236   | BGIOSGA005731 | XP_006662644.2 protein NRT1/ PTR FAMILY 8.3-like                                           |
| TCONS_00004041 | 0.975302 | 0.216333   | -0.0748344   | BGIOSGA026798 | XP_010232067.1 zinc-finger homeodomain protein 5                                           |
| TCONS_00018672 | 0.975467 | -0.112465  | 0.0581833    | BGIOSGA033359 | XP_004977108.1 peroxidase 5                                                                |
| TCONS_00006897 | 0.975727 | 0.363813   | 0.85665      | BGIOSGA009075 | XP_006647918.1 50S ribosomal protein L29, chloroplatic                                     |
| TCONS_00015898 | 0.976205 | 0.969441   | 0.443368     | BGIOSGA008610 | XP_006652297.1 protein GrpE-like                                                           |
| TCONS_00034611 | 0.976471 | 0.234628   | 1.19412      | BGIOSGA034206 | XP_015697946.1 hemolysin A                                                                 |
| TCONS_00008995 | 0.977412 | 2.20345    | 1.09459      | BGIOSGA012143 | XP_015689600.1 chaperone protein DnaJ                                                      |
| TCONS_00001969 | 0.977711 | 0.662106   | -0.185777    | #N/A          | #N/A                                                                                       |
| TCONS_00017085 | 0.977819 | -5.88339   | -0.837313    | BGIOSGA023839 | XP_006654966.1 peroxidase 5-like                                                           |
| TCONS_00007461 | 0.978383 | 1.91906    | 1.38539      | BGIOSGA017738 | XP_021315643.1 uncharacterized protein LOC8077621                                          |
| TCONS_00034639 | 0.978787 | 1.52079    | 1.81182      | BGIOSGA006722 | XP_006662913.1 subtilisin-like protease SBT3.9                                             |
| TCONS_00017496 | 0.979088 | 0.741967   | 1.11453      | BGIOSGA032304 | XP_015692757.1 solute carrier family 35 member F1-like                                     |
| TCONS_00009664 | 0.97985  | 2.24541    | 1.61653      | BGIOSGA032464 | XP_006649713.1 NHP2-like protein 1                                                         |
| TCONS_00032466 | 0.979892 | -0.532288  | -0.930937    | BGIOSGA031654 | XP_006661887.1 putative GEM-like protein 8                                                 |
| TCONS_00036652 | 0.980399 | 1.35777    | 0.787904     | BGIOSGA007988 | XP_006663193.1 DNA-directed RNA polymerase V subunit 5A                                    |
| TCONS_00029934 | 0.980551 | 0.398745   | 0.525556     | BGIOSGA026979 | XP_006660585.1 mitochondrial pyruvate carrier 1-like                                       |
| TCONS_00031279 | 0.980618 | -0.408043  | 1.2162       | BGIOSGA029218 | XP_010234799.1 ketohexokinase isoform X3                                                   |
| TCONS_00004163 | 0.980713 | 1.16203    | 0.841574     | BGIOSGA031604 | XP_015688208.1 PREDICTED: uncharacterized protein LOC102703076                             |
| TCONS_00017820 | 0.980735 | 0.620873   | 1.36353      | BGIOSGA019880 | XP_004962075.1 thioredoxin-like fold domain-containing protein MRL7L homolog, chloroplatic |
| TCONS_00035017 | 0.981585 | 0.0484211  | 0.286157     | BGIOSGA033840 | XP_015692222.1 protein MRG1-like isoform X1                                                |
| TCONS_00019945 | 0.982118 | 1.0755     | -0.594868    | BGIOSGA024835 | XP_004964259.1 uncharacterized acetyltransferase At3g50280                                 |
| TCONS_00026587 | 0.982508 | 0.437577   | 1.2917       | BGIOSGA030631 | XP_006659387.1 hexuronate transporter                                                      |
| TCONS_00025538 | 0.983158 | 0.332179   | 1.70782      | #N/A          | #N/A                                                                                       |
| TCONS_00034653 | 0.98338  | -1.39437   | 0.82893      | BGIOSGA035579 | XP_015698073.1 disease resistance protein RPM1-like                                        |
| TCONS_00005337 | 0.983843 | 1.8796     | 1.61185      | BGIOSGA007445 | XP_006646826.1 PREDICTED: uncharacterized protein LOC102718334                             |
| TCONS_00011432 | 0.984884 | #NA        | -0.304174    | BGIOSGA009327 | XP_006649253.1 remorin-like                                                                |
| TCONS_00010174 | 0.985318 | 0.971525   | 0.618824     | BGIOSGA024341 | XP_021306416.1 transmembrane protein 64                                                    |
| TCONS_00018623 | 0.985542 | 3.5338     | 1.71652      | #N/A          | #N/A                                                                                       |
| TCONS_00032839 | 0.986151 | 0.734429   | 0.595499     | BGIOSGA036728 | XP_006662663.2 PREDICTED: uncharacterized protein LOC102720274 isoform X1                  |
| TCONS_00008624 | 0.98663  | 1.33208    | 0.759026     | BGIOSGA005800 | XP_006647721.1 histone acetyltransferase MCC1 isoform X1                                   |
| TCONS_00030172 | 0.98683  | #NA        | -0.623041    | BGIOSGA013162 | XP_003578241.2 cyclin-dependent kinase inhibitor 6                                         |
| TCONS_00023150 | 0.986922 | -0.813649  | -0.987401    | BGIOSGA014650 | XP_006657460.1 protein YABBY 1                                                             |
| TCONS_00011478 | 0.986949 | 0.263896   | 1.14761      | BGIOSGA011547 | NP_001315323.1 uncharacterized LOC103631233                                                |
| TCONS_00035547 | 0.986992 | -1.99328   | 0.853085     | BGIOSGA009804 | XP_006663808.1 protein STRICTOSIDINE SYNTHASE-LIKE 10-like                                 |
| TCONS_00022345 | 0.987327 | -0.591754  | 1.09904      | BGIOSGA009826 | NP_001148396.1 avr9/Cf-9 rapidly elicited protein 194                                      |
| TCONS_00010484 | 0.987608 | -0.0126103 | -0.88527     | BGIOSGA004504 | XP_006650282.2 glycerophosphodiester phosphodiesterase GDDP6-like                          |
| TCONS_00014319 | 0.987615 | 0.77046    | 1.33278      | BGIOSGA016483 | XP_006652329.1 PREDICTED: uncharacterized protein LOC102721441                             |
| TCONS_00030946 | 0.987891 | -0.399806  | 2.09762      | BGIOSGA009322 | XP_015697407.1 PREDICTED: uncharacterized protein LOC102721865                             |
| TCONS_00025524 | 0.989248 | 1.40585    | 1.0942       | BGIOSGA011334 | XP_006658809.1 proteasome subunit alpha type-6-like                                        |
| TCONS_00032103 | 0.989349 | 0.416883   | 0.470216     | BGIOSGA002173 | XP_006661727.1 IRK-interacting protein-like                                                |
| TCONS_00031270 | 0.989634 | 2.04779    | 2.66647      | BGIOSGA031760 | XP_002467125.2 uncharacterized protein LOC8059268 isoform X1                               |
| TCONS_00009628 | 0.989993 | 3.19214    | 1.36868      | BGIOSGA011298 | XP_006651191.1 probable inactive poly [ADP-ribose] polymerase SRO3                         |
| TCONS_00036807 | 0.990259 | 0.683378   | 0.170937     | BGIOSGA023617 | XP_006663886.1 3'(2'),5'-bisphosphate nucleotidase                                         |
| TCONS_00004482 | 0.990722 | 2.91856    | 1.70348      | BGIOSGA000739 | XP_006644774.1 PREDICTED: uncharacterized protein LOC102712946                             |
| TCONS_00003977 | 0.990906 | 0.987501   | 0.510534     | BGIOSGA001214 | XP_008672662.1 uncharacterized LOC100278657 isoform X1                                     |
| TCONS_00016057 | 0.99093  | 1.98869    | 1.32445      | BGIOSGA014922 | XP_015691494.1 PREDICTED: uncharacterized protein LOC107304021                             |
| TCONS_00000589 | 0.991506 | -0.259966  | 0.984969     | BGIOSGA003173 | XP_006644009.1 bifunctional epoxide hydrolase 2-like                                       |
| TCONS_00005352 | 0.99161  | 0.257632   | 1.05982      | BGIOSGA007467 | XP_006648283.1 PREDICTED: uncharacterized protein LOC102720491                             |
| TCONS_00025300 | 0.991632 | 1.79935    | 2.29144      | BGIOSGA024126 | XP_006658674.1 pentatricopeptide repeat-containing protein At3g46870-like                  |

## transcriptome

|                |          |            |            |               |                                                                                                  |
|----------------|----------|------------|------------|---------------|--------------------------------------------------------------------------------------------------|
| TCONS_00019399 | 0.99193  | 1.56249    | 1.11308    | BGIOSGA006658 | XP_004961917.1 phosphoglucan, water dikinase, chloroplastic                                      |
| TCONS_00000285 | 0.992043 | 1.91689    | 1.48516    | BGIOSGA002862 | XP_006643810.2 PREDICTED: uncharacterized protein LOC102708838                                   |
| TCONS_00024294 | 0.992082 | -3.99005   | -3.58532   | BGIOSGA026355 | XP_015695027.1 momilactone A synthase-like XP_006663807.1 probable calcium-binding protein CML36 |
| TCONS_00035545 | 0.992146 | 1.038      | 1.6769     | BGIOSGA022398 | XP_015697559.1 RING-H2 finger protein ATL38-like                                                 |
| TCONS_00034309 | 0.992196 | 0.594768   | 1.90625    | BGIOSGA036632 | XP_015689885.1 Fanconi anemia group I protein                                                    |
| TCONS_00012239 | 0.992417 | -0.119002  | 0.9869     | BGIOSGA026380 | XP_003565749.1 hydroxyethylthiazole kinase                                                       |
| TCONS_00003554 | 0.992451 | 2.33141    | 2.69916    | BGIOSGA001652 | XP_006654824.1 malate dehydrogenase, mitochondrial-like                                          |
| TCONS_00019842 | 0.992737 | 1.34834    | 0.91791    | BGIOSGA017515 | XP_006661403.1 peptidyl-prolyl cis-trans isomerase FKBP15-1-like                                 |
| TCONS_00030314 | 0.992767 | 0.880959   | 0.787498   | BGIOSGA000261 | XP_015689849.1 cardiolipin synthase (CMP-forming), mitochondrial                                 |
| TCONS_00012040 | 0.993294 | 0.178344   | 0.388937   | BGIOSGA018766 | XP_006644024.2 PREDICTED: uncharacterized protein LOC102701030                                   |
| TCONS_00000615 | 0.994287 | -0.822908  | 0.164077   | BGIOSGA003198 | XP_006652721.1 scarecrow-like protein 9                                                          |
| TCONS_00014846 | 0.994878 | 1.22029    | 0.708106   | BGIOSGA035743 | XP_004957739.1 protein VASCULAR ASSOCIATED DEATH 1, chloroplastic                                |
| TCONS_00023694 | 0.995038 | 0.449164   | 0.546876   | BGIOSGA013759 | #N/A                                                                                             |
| TCONS_00032136 | 0.995074 | 1.40365    | 2.01974    | #N/A          | #N/A                                                                                             |
| TCONS_00011731 | 0.995098 | 1.03629    | 0.816108   | BGIOSGA011278 | XP_015691055.1 COP9 signalosome complex subunit 4                                                |
| TCONS_00009465 | 0.995489 | 0.804901   | 1.08796    | BGIOSGA012012 | XP_006649527.1 bet1-like protein At1g29060                                                       |
| TCONS_00030517 | 0.996266 | 0.752094   | 0.691447   | BGIOSGA029290 | XP_006660960.1 signal peptidase complex subunit 3B-like                                          |
| TCONS_00024589 | 0.996396 | 1.05687    | 0.706573   | BGIOSGA024804 | XP_006657454.1 F-box/kelch-repeat protein At1g30090                                              |
| TCONS_00017933 | 0.996403 | 2.40965    | 0.943107   | BGIOSGA017247 | XP_002439911.1 glycerol-3-phosphate acyltransferase 5                                            |
| TCONS_00001010 | 0.996405 | 0.844103   | 0.651523   | BGIOSGA003612 | XP_006644214.1 ATP-dependent Clp protease proteolytic subunit 3, chloroplastic                   |
| TCONS_00032216 | 0.996851 | 1.91083    | 1.6993     | BGIOSGA031923 | XP_004983185.1 histone acetyltransferase GCN5                                                    |
| TCONS_00011715 | 0.996948 | 0.973957   | 0.356661   | BGIOSGA011295 | XP_006649540.1 NADH dehydrogenase [ubiquinone] 1 alpha subcomplex subunit 13-B-like              |
| TCONS_00024018 | 0.997124 | 1.73831    | 1.03153    | BGIOSGA023406 | XP_006658757.1 pentatricopeptide repeat-containing protein At5g02860                             |
| TCONS_00025089 | 0.997448 | -0.800325  | 0.25057    | BGIOSGA024310 | XP_015694492.1 PREDICTED: uncharacterized protein LOC102708262 isoform X1                        |
| TCONS_00028611 | 0.997488 | -0.539803  | -1.51579   | BGIOSGA030361 | XP_024312582.1 protein ACTIVITY OF BC1 COMPLEX KINASE 7, chloroplastic                           |
| TCONS_00012274 | 0.99786  | 1.1697     | 0.823168   | BGIOSGA006674 | XP_024318726.1 divinyl chlorophyllide a 8-vinyl-reductase, chloroplastic                         |
| TCONS_00012002 | 0.99859  | 0.907592   | 1.31304    | BGIOSGA011006 | XP_006649849.1 PREDICTED: uncharacterized protein LOC102714542                                   |
| TCONS_00008664 | 0.998963 | 0.455525   | -0.13182   | BGIOSGA029182 | XP_015688709.1 monodehydroascorbate reductase 4, peroxisomal-like                                |
| TCONS_00019076 | 1.00021  | 1.69021    | 0.451534   | BGIOSGA018283 | XP_015693176.1 chaperone protein DnaJ-like                                                       |
| TCONS_00004425 | 1.00141  | -0.339969  | 0.707382   | BGIOSGA000797 | XP_015688342.1 pentatricopeptide repeat-containing protein At4g21190                             |
| TCONS_00020405 | 1.00149  | 0.416101   | 0.939996   | BGIOSGA014706 | XP_015693517.1 probable fructokinase-6, chloroplastic                                            |
| TCONS_00009298 | 1.00294  | 0.917807   | 1.14399    | BGIOSGA011837 | XP_006649386.1 PHD finger protein ING1 isoform X2                                                |
| TCONS_00033175 | 1.00424  | 0.00568852 | 0.208679   | #N/A          | #N/A                                                                                             |
| TCONS_00034259 | 1.00505  | 0.829232   | 1.68719    | BGIOSGA036666 | XP_006664844.1 50S ribosomal protein L24-like                                                    |
| TCONS_00022864 | 1.00533  | -0.0122932 | -0.773872  | BGIOSGA007507 | XP_006657314.2 protein ALG2-like                                                                 |
| TCONS_00035112 | 1.00567  | 1.26532    | 1.23756    | BGIOSGA017612 | XP_006663566.1 probable galacturonosyltransferase 6 isoform X1                                   |
| TCONS_00012156 | 1.00601  | 0.984177   | 0.731115   | BGIOSGA026158 | XP_003558047.1 130S ribosomal protein S1, chloroplastic                                          |
| TCONS_00028657 | 1.00694  | -0.0731645 | 0.356349   | BGIOSGA016161 | XP_002459936.1 glucan endo-1,3-beta-glucosidase 5                                                |
| TCONS_00026226 | 1.00718  | 2.29473    | 0.75847    | BGIOSGA028304 | XP_015695458.1 thioredoxin domain-containing protein 9 homolog isoform X3                        |
| TCONS_00008187 | 1.0072   | 2.05218    | 0.928163   | BGIOSGA006251 | XP_015689469.1 PREDICTED: uncharacterized protein LOC102701060                                   |
| TCONS_00008584 | 1.00777  | 0.632999   | -0.017438  | BGIOSGA005843 | XP_002452756.22-C-methyl-D-erythritol 2,4-cyclodiphosphate synthase, chloroplastic               |
| TCONS_00027946 | 1.0081   | 2.41788    | 0.228609   | BGIOSGA004756 | XP_006659368.1 2-methylene-furan-3-one reductase                                                 |
| TCONS_00016643 | 1.00834  | 0.219444   | 1.74972    | BGIOSGA014318 | XP_015691678.1 exonuclease DPD1, chloroplastic/mitochondrial                                     |
| TCONS_00004771 | 1.00835  | 0.828081   | 0.692146   | BGIOSGA019956 | XP_006645064.1 PREDICTED: uncharacterized protein LOC102702232                                   |
| TCONS_00000016 | 1.00851  | 0.31312    | -0.0113112 | BGIOSGA002587 | XP_006643633.1 probable inactive shikimate kinase like 1, chloroplastic isoform X3               |
| TCONS_00011991 | 1.00871  | 1.34569    | 1.78199    | BGIOSGA011019 | XP_006649832.2 PREDICTED: uncharacterized protein LOC102709256                                   |
| TCONS_00005967 | 1.00892  | 1.69309    | 0.722014   | BGIOSGA030364 | XP_006647209.1 GTPase activating protein 1                                                       |
| TCONS_00002479 | 1.00905  | 0.386563   | 0.760395   | BGIOSGA018345 | XP_011000911.1 cytochrome c1-2, heme protein, mitochondrial-like                                 |
| TCONS_00019862 | 1.00912  | 1.42525    | 1.47671    | BGIOSGA017496 | XP_006654832.1 PREDICTED: uncharacterized protein LOC102711434                                   |
| TCONS_00016802 | 1.00928  | -0.112446  | 0.46479    | BGIOSGA014164 | XP_006652967.1 repressor of RNA polymerase III transcription MAF1 homolog isoform X2             |
| TCONS_00025634 | 1.0098   | 2.69936    | 1.42362    | BGIOSGA023793 | XP_012699642.1 CTL-like protein                                                                  |
| TCONS_00021523 | 1.01112  | 1.21755    | 0.403465   | BGIOSGA017662 | DDB_G0274487                                                                                     |
|                |          |            |            |               | XP_010090590.1 oligopeptide transporter 7                                                        |

transcriptome

|                |         |             |             |               |                                                                                     |
|----------------|---------|-------------|-------------|---------------|-------------------------------------------------------------------------------------|
| TCONS_00011639 | 1.01129 | 0.104948    | 2.37567     | BGIOSGA029695 | XP_006649469.1PREDICTED: uncharacterized protein LOC102700314                       |
| TCONS_00001131 | 1.01137 | 1.67139     | 2.01837     | BGIOSGA018054 | XP_021308602.1uncharacterized protein LOC8059909                                    |
| TCONS_00022671 | 1.01119 | 1.44396     | 2.4389      | BGIOSGA033295 | XP_006657197.1PREDICTED: uncharacterized protein LOC102716791, partial              |
| TCONS_00022794 | 1.01216 | 0.644717    | 0.717678    | BGIOSGA020659 | XP_006656392.1 50S ribosomal protein L24, chloroplastic                             |
| TCONS_00008714 | 1.01238 | 1.87927     | 1.82447     | BGIOSGA022396 | XP_015689331.1 uncharacterized WD repeat-containing protein C2A9.03-like            |
| TCONS_00029629 | 1.01335 | 2.09056     | 1.53829     | BGIOSGA017054 | XP_002465768.1multiple organellar RNA editing factor 8, chloroplastic/mitochondrial |
| TCONS_00019656 | 1.01394 | 2.15399     | 0.919319    | BGIOSGA001432 | NP_001147295.1harpin-induced protein                                                |
| TCONS_00017833 | 1.01394 | 1.49456     | 1.00581     | BGIOSGA038922 | XP_006654419.1 cytochrome c                                                         |
| TCONS_00037571 | 1.01456 | 1.46829     | 0.852907    | BGIOSGA023512 | XP_006664226.1 thaumatin-like protein                                               |
| TCONS_00007592 | 1.01469 | 0.840104    | 0.66816     | BGIOSGA020437 | XP_002451757.2uncharacterized protein LOC8071670                                    |
| TCONS_00013935 | 1.01492 | -0.169401   | -0.470278   | BGIOSGA034501 | XP_004959425.1UDP-glycosyltransferase 90A1                                          |
| TCONS_00013447 | 1.01537 | 2.37752     | 2.60007     | BGIOSGA009192 | XP_006651972.1 pentatricopeptide repeat-containing protein At1g74850, chloroplastic |
| TCONS_00010211 | 1.016   | 0.740008    | 1.17281     | BGIOSGA014982 | XP_006650147.1PREDICTED: uncharacterized protein LOC102708135                       |
| TCONS_00010054 | 1.01628 | 0.593046    | -0.0865053  | BGIOSGA004365 | XP_004954455.1caffeic acid 3-O-methyltransferase                                    |
| TCONS_00003957 | 1.01726 | 2.72714     | 0.611417    | BGIOSGA025831 | XP_006646084.1 ABC transporter G family member 36                                   |
| TCONS_00003435 | 1.01732 | 0.859635    | 0.860806    | BGIOSGA001787 | XP_006644123.2PREDICTED: uncharacterized protein LOC102705856                       |
| TCONS_00010714 | 1.0174  | -0.00555973 | -0.73932    | BGIOSGA013339 | XP_006650409.1 protein LST8 homolog                                                 |
| TCONS_00003943 | 1.01797 | 1.52476     | 1.49545     | BGIOSGA005493 | XP_024312682.1DNL-type zinc finger protein-like                                     |
| TCONS_00010188 | 1.01827 | 0.116314    | 1.23209     | BGIOSGA012750 | XP_006650138.1 transcription factor bHLH47-like                                     |
| TCONS_00014314 | 1.01853 | 0.311836    | 0.835648    | BGIOSGA013003 | XP_006652325.1 26S proteasome non-ATPase regulatory subunit 11 homolog              |
| TCONS_00002147 | 1.01868 | 1.59588     | 1.87737     | BGIOSGA029371 | XP_006644990.1 triosephosphate isomerase, cytosolic-like                            |
| TCONS_00035757 | 1.01926 | -0.143182   | 0.264808    | BGIOSGA005265 | XP_006663911.1 cytochrome b5-like                                                   |
| TCONS_00021365 | 1.0196  | 0.0819074   | 0.756406    | BGIOSGA030976 | XP_006657336.1 polygalacturonate 4-alpha-galacturonosyltransferase-like             |
| TCONS_00010621 | 1.0196  | 0.876092    | 1.47984     | BGIOSGA031868 | XP_006651580.1 TATA-binding protein 2-like                                          |
| TCONS_00030832 | 1.01974 | 2.28502     | 1.25487     | BGIOSGA012829 | XP_010234663.3uncharacterized protein LOC100839410                                  |
| TCONS_00022613 | 1.0202  | -1.99685    | 0.275757    | BGIOSGA011993 | XP_006657163.2 protein STRUBBELIG-RECEPTOR FAMILY 8-like                            |
| TCONS_00007563 | 1.02024 | 0.0226931   | 1.10991     | BGIOSGA035073 | XP_002453506.1uncharacterized protein LOC8082925                                    |
| TCONS_00002864 | 1.02056 | 0.311969    | -0.105599   | BGIOSGA024190 | XP_021313686.1pentatricopeptide repeat-containing protein At3g46870                 |
| TCONS_00019809 | 1.02062 | 0.758418    | 1.16782     | BGIOSGA038246 | XP_015692802.1 GTPase Era                                                           |
| TCONS_00002938 | 1.02091 | -0.406653   | 0.541985    | BGIOSGA002288 | XP_003569450.1NADH-cytochrome b5 reductase-like protein                             |
| TCONS_00022167 | 1.02132 | 1.15553     | 1.11347     | BGIOSGA035006 | XP_015695863.1 AT-hook motif nuclear-localized protein 10-like                      |
| TCONS_00017543 | 1.02253 | -3.34849    | -1.53339    | BGIOSGA027272 | XP_006654258.2 probable receptor-like protein kinase At1g80640                      |
| TCONS_00031765 | 1.02273 | 1.7783      | 1.11624     | BGIOSGA009263 | XP_006662187.2 putative F-box protein At5g38390                                     |
| TCONS_00010271 | 1.02278 | 1.12545     | 0.580731    | BGIOSGA012835 | XP_006651485.2 ubiquinone biosynthesis protein COQ9, mitochondrial                  |
| TCONS_00031346 | 1.02279 | -0.129913   | 1.0247      | BGIOSGA027998 | XP_002512354.2cation/calcium exchanger 5                                            |
| TCONS_00001523 | 1.02295 | -0.755188   | -0.00465485 | BGIOSGA004155 | XP_003569506.1pterin-4-alpha-carbinolamine dehydratase 2, mitochondrial isoform X2  |
| TCONS_00011797 | 1.0233  | -1.47499    | -1.21336    | BGIOSGA005059 | XP_006651171.1 protein DETOXIFICATION 42-like                                       |
| TCONS_00011299 | 1.0233  | -1.03332    | -0.584586   | BGIOSGA032907 | XP_015690146.1PREDICTED: uncharacterized protein LOC102700516                       |
| TCONS_00015478 | 1.02346 | 0.737928    | 0.943108    | BGIOSGA040585 | XP_006653210.1 glycerol-3-phosphate dehydrogenase SDP6, mitochondrial               |
| TCONS_00016645 | 1.02348 | 0.698025    | -0.637308   | BGIOSGA028122 | XP_006652851.1 starch synthase 3, chloroplastic/amyloplastic-like                   |
| TCONS_00034985 | 1.02383 | -0.298528   | 0.582817    | BGIOSGA033865 | XP_021302228.1putative F-box/FBD/LRR-repeat protein At4g03220 isoform X2            |
| TCONS_00013504 | 1.02386 | 0.437583    | 0.147995    | BGIOSGA009478 | XP_021320644.1transcription factor TFIIB component B"                               |
| TCONS_00036760 | 1.02398 | -1.95366    | -1.01612    | BGIOSGA034424 | XP_006663860.1 filament-like plant protein 3                                        |
| TCONS_00011268 | 1.02465 | -4.93612    | 0.709297    | BGIOSGA013872 | XP_006650844.1PREDICTED: uncharacterized protein LOC102721821                       |
| TCONS_00013175 | 1.02478 | 1.63287     | 0.603569    | BGIOSGA009809 | XP_006650586.1 protein NAR1 isoform X1                                              |
| TCONS_00020097 | 1.02489 | 1.06176     | 1.37622     | BGIOSGA022277 | XP_015694456.1 superoxide dismutase [Fe] 2, chloroplastic                           |
| TCONS_00030130 | 1.02508 | 1.18254     | 1.21301     | BGIOSGA029676 | XP_004956948.1mediator of RNA polymerase II transcription subunit 20a               |
| TCONS_00013126 | 1.02539 | 1.28209     | 0.503533    | BGIOSGA006937 | XP_006650547.1 50S ribosomal protein L7/L12-like                                    |
| TCONS_00031691 | 1.02565 | 0.943781    | 0.502925    | BGIOSGA004678 | XP_004983514.1ADP-ribosylation factor                                               |
| TCONS_00006098 | 1.02613 | 0.845282    | -0.215624   | BGIOSGA020176 | XP_015689416.1 probable magnesium transporter NIPA2 isoform X1                      |
| TCONS_00006789 | 1.02626 | 1.90884     | 1.49567     | BGIOSGA008964 | NP_001281105.1BSD domain containing protein                                         |
| TCONS_00030402 | 1.02644 | -0.270004   | 0.212607    | BGIOSGA037146 | XP_006660878.1 B-box zinc finger protein 19                                         |
| TCONS_00027743 | 1.02655 | 1.23489     | 0.780682    | BGIOSGA027258 | XP_006659281.1PREDICTED: uncharacterized protein LOC102715501                       |
| TCONS_00013220 | 1.02715 | 0.289304    | 0.384767    | BGIOSGA019993 | XP_006650639.1 zinc finger protein 1-like                                           |
| TCONS_00028477 | 1.02745 | 1.99026     | 1.19042     | BGIOSGA027834 | XP_006659707.1 protein SRC2 homolog                                                 |
| TCONS_00023868 | 1.02776 | 1.71953     | 0.9596      | BGIOSGA023949 | XP_010241030.1 protein H2A.7                                                        |

transcriptome

|                |         |           |            |               |                                                                                             |
|----------------|---------|-----------|------------|---------------|---------------------------------------------------------------------------------------------|
| TCONS_00028757 | 1.02777 | -0.398864 | 0.860078   | BGIOSGA027062 | XP_003577985.1NEDD8-conjugating enzyme Ubc12                                                |
| TCONS_00033007 | 1.02787 | 0.449009  | -1.3101    | BGIOSGA023553 | XP_022684826.1putative pentatricopeptide repeat-containing protein At3g13770, mitochondrial |
| TCONS_00011524 | 1.02862 | 1.098     | 1.36752    | BGIOSGA011494 | XP_006649360.1 pentatricopeptide repeat-containing protein At4g35130, chloroplastic         |
| TCONS_00011410 | 1.02886 | 0.965793  | 1.55388    | BGIOSGA031660 | XP_006650953.1 AT-hook motif nuclear-localized protein 9-like                               |
| TCONS_00016060 | 1.03043 | 0.597816  | -0.731584  | BGIOSGA014918 | XP_002447999.1heavy metal-associated isoprenylated plant protein 47                         |
| TCONS_00023007 | 1.03071 | 1.43873   | 0.805518   | BGIOSGA024953 | XP_006648343.1PREDICTED: uncharacterized protein LOC102716192                               |
| TCONS_00004818 | 1.03109 | 1.52298   | 1.32565    | BGIOSGA019041 | XP_004970765.1DNA repair RAD52-like protein 1, mitochondrial                                |
| TCONS_00011232 | 1.03114 | 1.69636   | -0.511729  | BGIOSGA025702 | XP_006650805.1 actin-depolymerizing factor 3                                                |
| TCONS_00002973 | 1.03226 | 0.277923  | 0.839073   | BGIOSGA002246 | XP_015697198.1 protein GIGANTEA                                                             |
| TCONS_00021862 | 1.03234 | 1.96524   | 1.72646    | BGIOSGA021658 | XP_015693754.1 chaperone protein dnaJ 1, mitochondrial isoform X1                           |
| TCONS_00022416 | 1.03244 | -0.726661 | -2.32159   | BGIOSGA002191 | XP_008659681.1uncharacterized protein LOC103638588                                          |
| TCONS_00011329 | 1.03417 | -1.69412  | -0.393877  | BGIOSGA005768 | XP_003562420.1CRIB domain-containing protein RIC4                                           |
| TCONS_00004065 | 1.03452 | #NA       | -0.741795  | BGIOSGA036168 | XP_006646144.1 zinc finger CCHC domain-containing protein 9                                 |
| TCONS_00014770 | 1.03456 | 0.518588  | 0.921056   | BGIOSGA016945 | XP_015691803.1 E3 ubiquitin-protein ligase RLIM-like isoform X1                             |
| TCONS_00030963 | 1.03472 | 1.27046   | 1.13217    | BGIOSGA026908 | XP_015697313.1 pentatricopeptide repeat-containing protein At4g26680, mitochondrial         |
| TCONS_00009947 | 1.0354  | 0.864111  | 0.639976   | BGIOSGA009782 | XP_006649983.1 nifU-like protein 1, chloroplastic                                           |
| TCONS_00009635 | 1.03546 | -0.281399 | -0.396773  | BGIOSGA024896 | XP_006649683.1 phytosulfokines                                                              |
| TCONS_00004386 | 1.03556 | 0.969851  | 1.67067    | BGIOSGA000835 | XP_006644699.1 pentatricopeptide repeat-containing protein At2g27800, mitochondrial         |
| TCONS_00033230 | 1.03558 | -1.51023  | 0.0223092  | BGIOSGA003922 | XP_006662849.1 chlorophyll a-b binding protein CP26, chloroplastic                          |
| TCONS_00020896 | 1.03559 | 0.143841  | 0.407555   | BGIOSGA010092 | XP_015693616.1 zinc transporter 10-like                                                     |
| TCONS_00007284 | 1.03736 | 1.6698    | 1.70202    | BGIOSGA010719 | XP_003573967.1E3 ubiquitin-protein ligase SINAT2                                            |
| TCONS_00027380 | 1.03796 | 0.507397  | 0.159488   | BGIOSGA027624 | XP_015695453.1PREDICTED: uncharacterized protein LOC102700172                               |
| TCONS_00000487 | 1.039   | 1.75694   | 1.97202    | BGIOSGA003062 | XP_006643943.1PREDICTED: uncharacterized protein LOC102701944                               |
| TCONS_00015159 | 1.03921 | 2.01299   | 1.60215    | BGIOSGA014105 | XP_006653870.1 anamorsin homolog 1                                                          |
| TCONS_00035786 | 1.03938 | 1.21576   | 0.852525   | BGIOSGA037189 | XP_006663919.1PREDICTED: uncharacterized protein LOC102710254 isoform X1                    |
| TCONS_00018704 | 1.04164 | 2.395     | 0.400369   | BGIOSGA002291 | XP_006654096.1 phospholipase D alpha 1-like                                                 |
| TCONS_00034355 | 1.04174 | -0.272688 | 0.138939   | BGIOSGA008598 | XP_008647952.1ATOZ1 isoform X1                                                              |
| TCONS_00001960 | 1.04322 | 1.28643   | 0.185123   | BGIOSGA023737 | XP_003564377.1pentatricopeptide repeat-containing protein At1g61870, mitochondrial          |
| TCONS_00012850 | 1.04324 | 1.0315    | 0.90623    | BGIOSGA010123 | XP_006650364.1 membrin-11-like                                                              |
| TCONS_00010352 | 1.04359 | -0.240575 | -0.689591  | #N/A          | #N/A                                                                                        |
| TCONS_00028837 | 1.04372 | 0.285787  | 0.643299   | BGIOSGA030587 | XP_006661157.1 histidine protein methyltransferase 1 homolog                                |
| TCONS_00013211 | 1.04412 | 1.23115   | 1.6127     | BGIOSGA009776 | XP_006650628.1 TIP41-like protein                                                           |
| TCONS_00010761 | 1.04414 | 0.226242  | 0.906224   | BGIOSGA013386 | XP_006650439.1 protein yippee-like                                                          |
| TCONS_00010856 | 1.04432 | 2.41988   | 1.35916    | BGIOSGA011918 | XP_008644553.1probable histone H2AXa                                                        |
| TCONS_00014566 | 1.04442 | -0.15831  | 0.465366   | BGIOSGA016728 | XP_006652487.1 filament-like plant protein 7                                                |
| TCONS_00010072 | 1.04541 | 0.772721  | -0.349463  | BGIOSGA012616 | XP_015691168.1 superoxide dismutase [Cu-Zn] 1                                               |
| TCONS_00024699 | 1.04582 | 0.831784  | 1.28731    | BGIOSGA002357 | XP_015694902.1 mitochondrial import inner membrane translocase subunit TIM14-1-like         |
| TCONS_00001930 | 1.04695 | 0.829051  | 0.617854   | BGIOSGA008864 | XP_006644801.1 secretory carrier-associated membrane protein 2                              |
| TCONS_00001534 | 1.04732 | 0.467002  | 1.49553    | BGIOSGA004165 | XP_006644483.1 high mobility group B protein 14                                             |
| TCONS_00035487 | 1.04762 | 0.319651  | 0.207219   | BGIOSGA036822 | XP_015698516.1 bis(5'-adenosyl)-triphosphatase-like                                         |
| TCONS_00009768 | 1.04813 | -0.588832 | -0.0281657 | BGIOSGA012320 | XP_006649836.2PREDICTED: uncharacterized protein LOC102710675                               |
| TCONS_00025576 | 1.04904 | -1.58477  | -0.383347  | BGIOSGA033071 | XP_003562619.1uncharacterized protein LOC100829568                                          |
| TCONS_00015396 | 1.04907 | 0.554802  | 0.387752   | BGIOSGA033044 | XP_006652116.1PREDICTED: uncharacterized protein LOC102701532                               |
| TCONS_00001013 | 1.04926 | -1.39295  | 1.0247     | BGIOSGA003615 | XP_002439670.1NRR repressor homolog 1                                                       |
| TCONS_00020266 | 1.05001 | 0.413929  | 0.853837   | BGIOSGA036042 | XP_023157105.1calcium uniporter protein 2, mitochondrial-like                               |
| TCONS_00021220 | 1.05074 | 1.67828   | 1.19937    | BGIOSGA016936 | XP_002437427.1probable transcription factor KAN4                                            |
| TCONS_00026289 | 1.05082 | 1.98268   | 1.28497    | BGIOSGA028374 | XP_006659269.1 alpha-soluble NSF attachment protein 2                                       |
| TCONS_00010103 | 1.05113 | 1.22286   | 0.774851   | BGIOSGA022438 | XP_003557888.1probable glutathione peroxidase 4                                             |
| TCONS_00022153 | 1.0513  | 1.8475    | 0.956965   | BGIOSGA000270 | XP_006656929.1 rho GDP-dissociation inhibitor 1-like                                        |
| TCONS_00028919 | 1.0513  | 0.717103  | 1.585      | BGIOSGA008205 | XP_004956719.1protein CHAPERONE-LIKE PROTEIN OF POR1, chloroplastic                         |
| TCONS_00006518 | 1.0518  | 0.402513  | 0.674975   | BGIOSGA008686 | XP_006647578.1PREDICTED: uncharacterized protein LOC102704121 isoform X1                    |
| TCONS_00030152 | 1.05233 | 1.00403   | 0.92488    | BGIOSGA006224 | XP_006660682.1 transmembrane protein 50 homolog                                             |
| TCONS_00020953 | 1.05294 | 1.65759   | -0.272746  | BGIOSGA023177 | XP_006656194.2 dehydrogenase/reductase SDR family member 12                                 |
| TCONS_00025922 | 1.05323 | 1.50516   | -0.0760497 | BGIOSGA023345 | XP_006659834.1 cytochrome P450 89A2-like                                                    |
| TCONS_00023454 | 1.05376 | 0.311897  | 0.837181   | BGIOSGA025486 | XP_006657609.2 hydroxypyruvate reductase                                                    |

transcriptome

|                |         |           |            |               |                                                                                                |
|----------------|---------|-----------|------------|---------------|------------------------------------------------------------------------------------------------|
| TCONS_00031352 | 1.05439 | 0.548153  | -0.287745  | BGIOSGA027680 | NP_001278609.160S ribosomal protein L37                                                        |
| TCONS_00013153 | 1.05458 | 1.09262   | 0.793933   | BGIOSGA015713 | XP_006650570.1 ATP-sulfurylase 3, chloroplastic<br>XP_006646347.1 protein CURVATURE            |
| TCONS_00001862 | 1.0546  | -0.673516 | -1.10992   | BGIOSGA004496 | THYLAKOID 1C, chloroplastic-like<br>XP_004978652.1R3H domain-containing protein 4              |
| TCONS_00035565 | 1.05564 | 0.073466  | -0.167149  | BGIOSGA034791 | XP_006652408.1 pentatricopeptide repeat-containing protein At1g62350-like                      |
| TCONS_00016090 | 1.05582 | 0.516793  | 1.01636    | BGIOSGA014889 | XP_006649750.1 HVA22-like protein i                                                            |
| TCONS_00011907 | 1.05697 | -1.68101  | 1.15829    | BGIOSGA011105 | XP_006644261.1 UPF0587 protein C1orf123                                                        |
| TCONS_00003816 | 1.05737 | 0.459683  | 0.231533   | BGIOSGA001396 | XP_006663814.1 stem-specific protein TSJT1                                                     |
| TCONS_00036671 | 1.05741 | -0.639032 | -1.09312   | BGIOSGA034502 | XP_015688725.1 pentatricopeptide repeat-containing protein At3g22690-like                      |
| TCONS_00008752 | 1.05754 | 1.13233   | 1.44328    | BGIOSGA005680 | XP_006659316.1 growth hormone-regulated TBC protein 1                                          |
| TCONS_00027850 | 1.05809 | 0.612033  | 0.721745   | BGIOSGA027156 | NP_001132805.1CRS1 / YhbY domain containing protein                                            |
| TCONS_00032552 | 1.05824 | 0.695655  | 1.2195     | BGIOSGA034281 | XP_006652137.2 4-hydroxy-tetrahydrodipicolinate synthase 1, chloroplastic                      |
| TCONS_00013834 | 1.05833 | 1.23528   | 0.998339   | BGIOSGA014516 | XP_006664721.2 VAN3-binding protein-like                                                       |
| TCONS_00037482 | 1.0587  | -0.989426 | 0.87534    | BGIOSGA028216 | XP_015694297.1 50S ribosomal protein L25                                                       |
| TCONS_00003914 | 1.05912 | 2.3676    | 1.62433    | BGIOSGA019517 | XP_006657784.1 probable pyruvate, phosphate dikinase regulatory protein, chloroplastic         |
| TCONS_00023822 | 1.05989 | 0.911934  | 1.01612    | BGIOSGA021484 | XP_006644228.1 probable ribosome biogenesis protein RLP24                                      |
| TCONS_00023502 | 1.06021 | 1.06747   | 1.54695    | BGIOSGA001536 | XP_006656020.1 peroxidase 1-like                                                               |
| TCONS_00020585 | 1.06094 | 2.29315   | 1.21768    | BGIOSGA012703 | XP_006650008.1 octanoyltransferase                                                             |
| TCONS_00012170 | 1.06127 | 0.86305   | 2.06998    | BGIOSGA010839 | XP_003573628.1nuclear pore complex protein NUP43                                               |
| TCONS_00026250 | 1.06144 | 1.91401   | 0.315981   | BGIOSGA028334 | XP_006662920.1 short integuments 2, mitochondrial                                              |
| TCONS_00033409 | 1.06174 | -0.185907 | 0.523821   | BGIOSGA033485 | XP_002437220.1croctin glucosyltransferase, chloroplastic                                       |
| TCONS_00020965 | 1.06234 | -1.19419  | -0.768611  | BGIOSGA022562 | XP_006643894.1 polyadenylate-binding protein-interacting protein 9-like                        |
| TCONS_00003070 | 1.06293 | 1.70715   | 0.999169   | BGIOSGA025757 | XP_006649488.1 nuclear transcription factor Y subunit A-7                                      |
| TCONS_00011657 | 1.06357 | 0.707333  | 1.09362    | BGIOSGA023919 | XP_006657980.1 UMP-CMP kinase 3                                                                |
| TCONS_00025551 | 1.06394 | 1.44353   | -0.0580227 | BGIOSGA022501 | XP_015694993.1 glutamic acid-rich protein-like                                                 |
| TCONS_00024086 | 1.06405 | 0.891417  | 1.54897    | BGIOSGA026119 | XP_003579964.1F-box protein At1g70590 isoform X1                                               |
| TCONS_00014440 | 1.06472 | 0.58796   | 0.793303   | BGIOSGA025577 | XP_004969618.1probable glutathione S-transferase GSTU6                                         |
| TCONS_00004216 | 1.06472 | 1.79819   | 1.52693    | BGIOSGA031679 | XP_006653384.1 digalactosyldiacylglycerol synthase 1, chloroplastic-like                       |
| TCONS_00014231 | 1.06476 | 2.40016   | 1.33499    | BGIOSGA034845 | XP_008651557.1B12D protein isoform X1                                                          |
| TCONS_00023474 | 1.06478 | 1.42531   | 0.908465   | BGIOSGA018909 | XP_015696730.1 probable hydroxyacylglutathione hydrolase 2, chloroplastic                      |
| TCONS_00030362 | 1.0648  | 0.0402025 | 0.0725688  | BGIOSGA029436 | XP_006651334.1 putative disease resistance protein RGA4                                        |
| TCONS_00012178 | 1.0655  | 1.96549   | 2.44346    | BGIOSGA028321 | XP_006645256.1PREDICTED: uncharacterized protein LOC102709973                                  |
| TCONS_00002441 | 1.06677 | -0.507499 | -0.152856  | BGIOSGA001288 | XP_006651188.2PREDICTED: uncharacterized protein LOC102710289                                  |
| TCONS_00011821 | 1.06692 | 1.28198   | 1.28616    | BGIOSGA013727 | XP_015699016.1 N-alpha-acetyltransferase MAK3                                                  |
| TCONS_00034956 | 1.06759 | 0.488296  | 1.01133    | BGIOSGA033896 | NP_001131008.1photolyase/blue-light receptor PHR2                                              |
| TCONS_00010055 | 1.06845 | 2.1598    | 1.12939    | BGIOSGA028820 | XP_003560546.1uncharacterized protein LOC100835592                                             |
| TCONS_00021363 | 1.06976 | 1.52945   | -0.0414879 | BGIOSGA026745 | XP_006656816.1 glutathione S-transferase DHAR3, chloroplastic-like                             |
| TCONS_00021922 | 1.07033 | 0.0863409 | 0.242818   | BGIOSGA021601 | XP_006644926.1PREDICTED: uncharacterized protein LOC102710071                                  |
| TCONS_00002081 | 1.07064 | -1.50321  | -4.86795   | BGIOSGA004711 | XP_015693263.1 type I inositol polyphosphate 5-phosphatase 1-like isoform X1                   |
| TCONS_00019695 | 1.07097 | 0.800262  | 1.16585    | BGIOSGA013259 | #N/A                                                                                           |
| TCONS_00017757 | 1.07108 | -1.21771  | 0.0778734  | #N/A          | #N/A                                                                                           |
| TCONS_00027474 | 1.07138 | 1.19863   | 1.05823    | BGIOSGA018487 | XP_003581244.1uncharacterized protein LOC100842205                                             |
| TCONS_00035312 | 1.0714  | 0.848282  | 1.35863    | BGIOSGA033600 | XP_006664861.1PREDICTED: uncharacterized protein LOC102700676                                  |
| TCONS_00000541 | 1.07152 | -0.397235 | -0.791901  | BGIOSGA000814 | XP_006643981.1 optic atrophy 3 protein homolog XP_003564869.1E3 ubiquitin-protein ligase AIRP2 |
| TCONS_00002374 | 1.07165 | -0.305164 | 0.0684988  | BGIOSGA033219 | XP_006650465.1 30S ribosomal protein S13, chloroplastic                                        |
| TCONS_00010782 | 1.07167 | 1.34572   | 1.14279    | BGIOSGA013409 | XP_006664110.1PREDICTED: uncharacterized protein LOC102699736                                  |
| TCONS_00037375 | 1.0717  | -0.208407 | 0.448761   | BGIOSGA035995 | XP_002455301.1fructose-bisphosphate aldolase 1, chloroplastic isoform X1                       |
| TCONS_00000085 | 1.07176 | 2.01025   | 1.61037    | BGIOSGA002654 | XP_006648037.1 UDP-glucuronate 4-epimerase 1                                                   |
| TCONS_00007005 | 1.07277 | 1.92346   | 0.905158   | BGIOSGA001789 | XP_015698506.1 putative leucine aminopeptidase 1                                               |
| TCONS_00035958 | 1.07362 | 1.58941   | 0.680672   | BGIOSGA005446 | XP_006652556.1 E3 ubiquitin-protein ligase RMA1H1-like isoform X2                              |
| TCONS_00016302 | 1.07425 | 0.0328615 | 1.28447    | BGIOSGA005963 | XP_021320677.1NDR1/HIN1-like protein 10                                                        |
| TCONS_00028234 | 1.07476 | -1.20859  | 0.369856   | BGIOSGA002813 | XP_006644318.1 probable V-type proton ATPase subunit d                                         |
| TCONS_00003889 | 1.07497 | 1.15519   | 0.702155   | BGIOSGA001323 | XP_006664663.2 scarecrow-like protein 9                                                        |
| TCONS_00036285 | 1.07545 | 2.28301   | 2.50334    | BGIOSGA010017 | XP_015690533.1PREDICTED: uncharacterized protein LOC107303854                                  |
| TCONS_00011214 | 1.07632 | -0.979138 | -0.714969  | BGIOSGA010658 |                                                                                                |



transcriptome

|                |         |            |            |               |                                                                                                             |
|----------------|---------|------------|------------|---------------|-------------------------------------------------------------------------------------------------------------|
| TCONS_00032545 | 1.07666 | 0.100454   | 0.775145   | BGIOSGA008704 | XP_004982635.1auxin-responsive protein SAUR32                                                               |
| TCONS_00022663 | 1.07702 | -1.99424   | 0.323957   | BGIOSGA022217 | XP_002438758.1uncharacterized protein LOC8058425                                                            |
| TCONS_00016601 | 1.07727 | 0.774144   | -0.126634  | BGIOSGA014363 | XP_006652809.1PREDICTED: uncharacterized protein LOC102699397                                               |
| TCONS_00037048 | 1.07762 | 1.53302    | 1.77294    | BGIOSGA023057 | XP_015698849.1 uncharacterized mitochondrial protein ymf11                                                  |
| TCONS_00036357 | 1.07785 | 1.99696    | 2.83605    | BGIOSGA027007 | XP_004963060.1uncharacterized protein LOC101786433                                                          |
| TCONS_00035504 | 1.07832 | -0.62812   | -1.22402   | BGIOSGA012529 | XP_015698179.1 ELMO domain-containing protein C-like                                                        |
| TCONS_00004196 | 1.07879 | 2.34091    | -1.2252    | BGIOSGA018441 | XP_006644559.1 acidic endochitinase-like XP_006647756.1 zeaxanthin 7,8(7',8')-cleavage                      |
| TCONS_00008650 | 1.079   | -0.74813   | -0.466458  | BGIOSGA013214 | dioxygenase, chromoplatic                                                                                   |
| TCONS_00008793 | 1.07912 | 0.160172   | -0.345036  | BGIOSGA002078 | XP_006647874.1 rac-like GTP-binding protein 3                                                               |
| TCONS_00002226 | 1.07974 | 1.44933    | 1.22759    | BGIOSGA036573 | XP_006645073.1 actin-7                                                                                      |
| TCONS_00023411 | 1.07987 | -0.183787  | -1.10006   | BGIOSGA018791 | XP_004955881.1uncharacterized protein LOC101759795                                                          |
| TCONS_00003192 | 1.08015 | 0.428458   | 0.471858   | BGIOSGA002304 | XP_015694317.1 GDSL esterase/lipase At4g10955-like                                                          |
| TCONS_00025876 | 1.08016 | 0.908441   | 1.19998    | BGIOSGA027941 | XP_006659801.1PREDICTED: uncharacterized protein LOC102706676 isoform X2                                    |
| TCONS_00012713 | 1.08021 | 2.0037     | 1.88675    | BGIOSGA000785 | XP_004982436.1serine/threonine-protein kinase SAFK10                                                        |
| TCONS_00028267 | 1.08058 | 0.416337   | 2.14494    | BGIOSGA033197 | XP_015695810.1 putative tRNA (cytidine(34)-2'-O)-methyltransferase                                          |
| TCONS_00018487 | 1.08086 | 0.878002   | 0.632115   | BGIOSGA008938 | XP_002440458.1mitochondrial import inner membrane translocase subunit Tim9                                  |
| TCONS_00017059 | 1.08113 | 0.746986   | -0.0194048 | BGIOSGA002217 | XP_002439217.2zinc finger CCCH domain-containing protein 33                                                 |
| TCONS_00029432 | 1.08121 | 1.687      | 2.50816    | BGIOSGA031181 | XP_004957509.1uncharacterized protein LOC101754806                                                          |
| TCONS_00001408 | 1.08151 | 1.91218    | 2.2275     | BGIOSGA020441 | XP_006644398.1 serine carboxypeptidase-like 50                                                              |
| TCONS_00011581 | 1.08283 | 0.757096   | -0.0684573 | BGIOSGA033027 | XP_006649414.1 ras-related protein RABF1                                                                    |
| TCONS_00032933 | 1.08296 | 1.38075    | 1.35766    | BGIOSGA000087 | XP_006663807.1 probable calcium-binding protein CML36                                                       |
| TCONS_00015882 | 1.08348 | -1.96134   | -1.06077   | BGIOSGA015104 | XP_003579736.2RNA-binding motif protein, X-linked-like-3                                                    |
| TCONS_00033224 | 1.08371 | 1.0757     | 1.15399    | BGIOSGA037131 | XP_006662845.2 CCR4-NOT transcription complex subunit 11-like                                               |
| TCONS_00019869 | 1.08512 | 0.325908   | -0.896777  | BGIOSGA025611 | XP_006654838.1 protein RADIALIS-like 3                                                                      |
| TCONS_00005194 | 1.08521 | 0.163128   | 1.47848    | BGIOSGA000011 | XP_013470439.1transmembrane protein, putative                                                               |
| TCONS_00028661 | 1.08521 | #NA        | #NA        | #N/A          | #N/A                                                                                                        |
| TCONS_00030633 | 1.08585 | -0.555733  | 1.26355    | BGIOSGA012208 | XP_003573741.1NHP2-like protein 1                                                                           |
| TCONS_00004982 | 1.08698 | 0.753062   | 0.780294   | BGIOSGA000235 | XP_006645241.1 transcription and mRNA export factor SUS1                                                    |
| TCONS_00027065 | 1.08736 | -1.46589   | 0.172294   | BGIOSGA029111 | XP_006660355.1 traB domain-containing protein XP_015689352.1PREDICTED: uncharacterized protein LOC102701141 |
| TCONS_00008337 | 1.08746 | 0.615901   | 0.787553   | BGIOSGA006089 | XP_004985484.13-ketoacyl-CoA synthase 10                                                                    |
| TCONS_00009437 | 1.08829 | 1.69419    | 1.03327    | BGIOSGA021631 | XP_006660269.1 estradiol 17-beta-dehydrogenase 8-like                                                       |
| TCONS_00028283 | 1.08835 | -0.0553162 | 0.601834   | BGIOSGA016787 | XP_006663942.1 isoflavone reductase homolog                                                                 |
| TCONS_00036954 | 1.0897  | -0.460925  | -0.535407  | BGIOSGA018532 | XP_004960371.1dnaJ homolog subfamily B member 4                                                             |
| TCONS_00017056 | 1.09004 | 0.311211   | 0.596223   | BGIOSGA011943 | XP_004960178.126S proteasome non-ATPase regulatory subunit 7 homolog A                                      |
| TCONS_00024887 | 1.09034 | -0.437085  | 0.95093    | BGIOSGA023001 | XP_006654608.2PREDICTED: uncharacterized protein LOC102719015                                               |
| TCONS_00019586 | 1.09071 | 1.63647    | 0.112325   | BGIOSGA017772 | XP_006650092.1 50S ribosomal protein L6, chloroplatic                                                       |
| TCONS_00012285 | 1.09086 | 0.909242   | 0.901207   | BGIOSGA013569 | XP_006655793.1 trafficking protein particle complex subunit 4                                               |
| TCONS_00023606 | 1.09132 | -0.389261  | 0.578502   | BGIOSGA025631 | XP_003568799.1ubiquitin-conjugating enzyme E2 2                                                             |
| TCONS_00017248 | 1.09187 | 0.720989   | 1.28903    | BGIOSGA009668 | XP_006658756.2PREDICTED: uncharacterized protein LOC102714574                                               |
| TCONS_00025441 | 1.09206 | 0.842286   | 0.805901   | BGIOSGA020130 | XP_006662062.1 hexose carrier protein HEX6-like                                                             |
| TCONS_00031626 | 1.09208 | 1.01171    | -0.271222  | BGIOSGA025094 | XP_015691585.1 cyclin-P1-1                                                                                  |
| TCONS_00014999 | 1.0925  | -0.279096  | -0.51135   | BGIOSGA025936 | XP_003574973.1uncharacterized protein LOC100839623                                                          |
| TCONS_00006049 | 1.0928  | 0.563043   | 1.29437    | BGIOSGA008205 | XP_006661791.1 SKP1-like protein 11                                                                         |
| TCONS_00031194 | 1.0945  | 1.3183     | 1.16703    | BGIOSGA025143 | XP_015691195.1 DEAD-box ATP-dependent RNA helicase 38                                                       |
| TCONS_00009352 | 1.09461 | 2.74116    | 1.74611    | BGIOSGA006824 |                                                                                                             |
| TCONS_00037261 | 1.09495 | 1.49861    | 0.498721   | #N/A          | #N/A                                                                                                        |
| TCONS_00016608 | 1.09504 | 0.723989   | 0.962843   | #N/A          | #N/A                                                                                                        |
| TCONS_00009136 | 1.09547 | -1.56655   | -0.831262  | BGIOSGA023353 | XP_015690260.1 pEARL1-like lipid transfer protein 1                                                         |
| TCONS_00006254 | 1.09566 | 1.17845    | 0.475997   | BGIOSGA008415 | XP_006647365.2 tetratricopeptide repeat protein 33                                                          |
| TCONS_00012558 | 1.09625 | 2.1677     | 1.12522    | BGIOSGA010416 | XP_006644417.1 DEAD-box ATP-dependent RNA helicase 2                                                        |
| TCONS_00016047 | 1.09667 | 1.33888    | -0.156239  | BGIOSGA022257 | XP_015691834.1PREDICTED: uncharacterized protein LOC102715199                                               |
| TCONS_00022006 | 1.09766 | 0.859762   | 0.768007   | BGIOSGA021511 | XP_006655979.1 signal recognition particle 9 kDa protein                                                    |
| TCONS_00032862 | 1.09794 | 0.27759    | -0.0362058 | BGIOSGA034679 | XP_006663744.1 probable non-specific lipid-transfer protein 3                                               |
| TCONS_00022002 | 1.09808 | -0.859142  | 1.13407    | BGIOSGA011585 | XP_006655976.1 nudix hydrolase 21, chloroplatic-like                                                        |

## transcriptome

|                |         |            |            |               |                                                                                                       |
|----------------|---------|------------|------------|---------------|-------------------------------------------------------------------------------------------------------|
| TCONS_00011208 | 1.09842 | 0.677762   | 0.64671    | BGIOSGA013809 | NP_001136636.1 uncharacterized LOC100216764 precursor                                                 |
| TCONS_00026057 | 1.09846 | 0.979679   | 2.3938     | BGIOSGA028130 | XP_006659201.1 pentatricopeptide repeat-containing protein At3g59040                                  |
| TCONS_00013555 | 1.09948 | 0.303543   | 0.612589   | BGIOSGA009420 | XP_006650914.1 pentatricopeptide repeat-containing protein At4g25270, chloroplastic-like              |
| TCONS_00023372 | 1.10073 | 2.06442    | 1.17191    | BGIOSGA004694 | XP_006657570.1 KH domain-containing protein SPIN1-like isoform X2                                     |
| TCONS_00018068 | 1.10077 | 0.2017     | 1.33246    | BGIOSGA022600 | XP_020396393.1 uncharacterized protein LOC103631732                                                   |
| TCONS_00031348 | 1.10121 | 1.23445    | 1.83526    | BGIOSGA033169 | XP_015697172.1 tetratricopeptide repeat protein 1                                                     |
| TCONS_00004102 | 1.10144 | 0.371677   | 1.15391    | BGIOSGA001087 | XP_006644466.1 vacuolar protein sorting-associated protein 25                                         |
| TCONS_00011090 | 1.10251 | 0.262945   | 0.891322   | BGIOSGA029275 | NP_001150776.2 syntaxin 121                                                                           |
| TCONS_00016049 | 1.1031  | 2.08094    | 0.447585   | BGIOSGA020710 | XP_022684202.1 probable inactive ATP-dependent zinc metalloprotease FTSH1 3, chloroplastic isoform X1 |
| TCONS_00022519 | 1.10329 | -0.782134  | -0.668177  | BGIOSGA007757 | XP_008658130.1 uncharacterized LOC100193920 isoform X1                                                |
| TCONS_00019153 | 1.10339 | 0.866391   | 0.946135   | BGIOSGA018199 | XP_006654308.1 chaperone protein dnaJ 49                                                              |
| TCONS_00011674 | 1.10373 | 0.596435   | 0.759916   | BGIOSGA031166 | XP_006649499.1 proteasome subunit alpha type-6                                                        |
| TCONS_00020588 | 1.10414 | 0.919289   | 1.27224    | BGIOSGA022772 | XP_006656019.1 trigger factor-like protein TIG, Chloroplastic                                         |
| TCONS_00030777 | 1.10502 | 1.31709    | 1.05719    | BGIOSGA027437 | XP_006661654.1 geraniol 8-hydroxylase-like                                                            |
| TCONS_00028702 | 1.1056  | 1.19436    | -1.10752   | BGIOSGA021171 | XP_015696850.1 ubiquitin-conjugating enzyme E2-17 kDa-like                                            |
| TCONS_00003990 | 1.10603 | 2.14816    | 1.72724    | BGIOSGA014210 | XP_015696505.1 protein ROOT PRIMORDIUM DEFECTIVE 1                                                    |
| TCONS_00011051 | 1.1063  | 0.204132   | 1.80263    | BGIOSGA027991 | XP_015691125.1 PREDICTED: uncharacterized protein At1g01500                                           |
| TCONS_00000379 | 1.10661 | -1.07757   | -0.949445  | BGIOSGA005280 | XP_021894753.1 metallothionein-like protein type 3                                                    |
| TCONS_00027156 | 1.1072  | 1.28449    | #N/A       | #N/A          | #N/A                                                                                                  |
| TCONS_00030364 | 1.10721 | 0.990786   | 1.01572    | BGIOSGA008586 | XP_006661438.2 C2 and GRAM domain-containing protein At1g03370                                        |
| TCONS_00020607 | 1.10747 | 0.946619   | 1.99861    | BGIOSGA031706 | XP_021306087.1 BTB/POZ domain-containing protein At2g04740 isoform X1                                 |
| TCONS_00009733 | 1.10769 | 1.00738    | 0.842561   | BGIOSGA007210 | XP_006651240.1 peroxisomal nicotinamide adenine dinucleotide carrier                                  |
| TCONS_00011830 | 1.1088  | -4.26064   | -4.1408    | BGIOSGA028301 | XP_004985109.1 uncharacterized protein At1g01500                                                      |
| TCONS_00018788 | 1.10961 | 2.707      | 2.09974    | BGIOSGA004533 | XP_002440770.1 casein kinase 1-like protein HD16 isoform X1                                           |
| TCONS_00023084 | 1.10975 | 0.421206   | 0.986663   | #N/A          | #N/A                                                                                                  |
| TCONS_00024041 | 1.11046 | 1.63542    | 1.79051    | BGIOSGA002124 | XP_006657919.1 pentatricopeptide repeat-containing protein At1g26460, mitochondrial                   |
| TCONS_00019843 | 1.11051 | 0.673625   | 0.0940262  | BGIOSGA009454 | XP_006654825.1 GTP-binding nuclear protein Ran-2                                                      |
| TCONS_00035111 | 1.11051 | -0.545427  | -0.145727  | BGIOSGA010624 | XP_003577407.13-ketoacyl-CoA synthase 20                                                              |
| TCONS_00009878 | 1.11065 | -0.0674678 | 0.188602   | BGIOSGA010019 | XP_003558117.1 sex determination protein tasselseed-2                                                 |
| TCONS_00027687 | 1.11139 | -2.76396   | -0.410519  | BGIOSGA027316 | XP_003573634.1 glycine-rich protein 5                                                                 |
| TCONS_00003105 | 1.11229 | 1.18441    | 0.3767     | BGIOSGA004136 | XP_006643912.1 histone-lysine N-methyltransferase ATX5-like                                           |
| TCONS_00015205 | 1.11243 | 1.38631    | 1.9954     | BGIOSGA030760 | XP_015691871.1 probable CCR4-associated factor 1 homolog 11                                           |
| TCONS_00036149 | 1.11374 | 0.604453   | -1.29165   | BGIOSGA011380 | XP_006664601.1 myosin-16-like                                                                         |
| TCONS_00032453 | 1.11414 | 1.96912    | 1.42412    | BGIOSGA036904 | XP_004982810.1 pentatricopeptide repeat-containing protein At5g16420, mitochondrial                   |
| TCONS_00000250 | 1.11466 | 1.40969    | 0.397877   | BGIOSGA002828 | XP_006643772.1 cell number regulator 8                                                                |
| TCONS_00002033 | 1.11522 | 1.03051    | 0.769871   | BGIOSGA017816 | XP_006644881.1 proteasome subunit alpha type-3                                                        |
| TCONS_00001766 | 1.11564 | -2.17494   | 0.201347   | BGIOSGA018579 | XP_015688100.1 BURP domain-containing protein 3                                                       |
| TCONS_00026981 | 1.11604 | -0.236206  | -0.0236316 | BGIOSGA016651 | XP_015696123.1 PGR5-like protein 1B, chloroplastic                                                    |
| TCONS_00009827 | 1.11854 | -0.394147  | -0.158086  | BGIOSGA035979 | XP_006649897.1 metallothionein-like protein 1B                                                        |
| TCONS_00005276 | 1.11876 | -0.0838157 | 0.0990172  | BGIOSGA026333 | XP_006646784.2 retinol dehydrogenase 12-like                                                          |
| TCONS_00003783 | 1.11917 | -0.167777  | 0.745984   | BGIOSGA001428 | XP_006644275.1 PREDICTED: uncharacterized protein LOC102706231                                        |
| TCONS_00031317 | 1.11977 | 1.79567    | 1.4012     | BGIOSGA033133 | XP_006664817.1 transportin-3 isoform X1                                                               |
| TCONS_00003015 | 1.12014 | 0.868468   | 1.46761    | BGIOSGA000017 | XP_002455007.1 translation machinery-associated protein 22                                            |
| TCONS_00008656 | 1.12024 | 0.561103   | 1.27323    | BGIOSGA005772 | XP_015689351.1 probable pinorensin-lariciresinol reductase 3                                          |
| TCONS_00011072 | 1.12024 | -0.656628  | 0.268152   | BGIOSGA022521 | XP_012704122.1 transcription factor PIF4 isoform X2                                                   |
| TCONS_00018372 | 1.12031 | 0.775929   | 0.925806   | BGIOSGA030202 | XP_003567812.1 cinamoyl-CoA reductase-like SNL6                                                       |
| TCONS_00018066 | 1.12072 | 1.10124    | 0.33482    | BGIOSGA024189 | XP_006654596.1 protein translation factor SU11 homolog                                                |
| TCONS_00017030 | 1.12148 | 0.902779   | 1.52542    | BGIOSGA023446 | XP_015692960.1 UPF0769 protein C21orf59 homolog                                                       |
| TCONS_00002829 | 1.12219 | 1.11507    | 1.21629    | BGIOSGA035283 | XP_015694044.1 probable LRR receptor-like serine/threonine-protein kinase At3g47570                   |
| TCONS_00003343 | 1.12225 | -2.12928   | -0.861998  | BGIOSGA022649 | XP_006644076.1 transcription factor MYB86                                                             |
| TCONS_00035968 | 1.12295 | 0.374627   | -0.996034  | BGIOSGA016983 | XP_015689643.1 UDP-glucose 6-dehydrogenase 4                                                          |
| TCONS_00004593 | 1.12327 | 1.56988    | 1.64072    | BGIOSGA000622 | XP_004970308.1 ribonuclease III domain-containing protein RNC1, chloroplastic                         |
| TCONS_00024174 | 1.12344 | 2.24229    | 0.497097   | BGIOSGA021748 | XP_006658008.1 cytochrome P450 709B2-like                                                             |
| TCONS_00028524 | 1.12356 | 1.25658    | 2.47315    | #N/A          | #N/A                                                                                                  |

transcriptome

|                |         |            |            |               |                                                                                           |
|----------------|---------|------------|------------|---------------|-------------------------------------------------------------------------------------------|
| TCONS_00017071 | 1.1236  | 1.57393    | 1.39866    | BGIOSGA019123 | XP_006654005.1PREDICTED: uncharacterized protein LOC102705341                             |
| TCONS_00013205 | 1.12389 | -0.4615    | -1.93598   | BGIOSGA029560 | XP_024313641.1UDP-glycosyltransferase 83A1-like                                           |
| TCONS_00004757 | 1.12469 | 0.562884   | 1.55333    | BGIOSGA036996 | XP_006645047.1 protein BUD31 homolog 1                                                    |
| TCONS_00012222 | 1.1261  | 0.704415   | 0.626241   | BGIOSGA011527 | XP_006650052.1 reticulon-like protein B16                                                 |
| TCONS_00012104 | 1.12636 | 2.41787    | 2.49989    | BGIOSGA011539 | XP_004955571.1 uncharacterized protein LOC101769811                                       |
| TCONS_00005770 | 1.12673 | 0.66667    | 2.14345    | BGIOSGA016295 | XP_006663096.2PREDICTED: uncharacterized protein LOC102715982                             |
| TCONS_00027465 | 1.12673 | #NA        | #NA        | #N/A          | #N/A                                                                                      |
| TCONS_00013059 | 1.1279  | -0.71722   | -0.30235   | BGIOSGA003890 | XP_003559532.1 uncharacterized protein LOC100838339                                       |
| TCONS_00020819 | 1.12824 | 0.664339   | 1.7247     | #N/A          | #N/A                                                                                      |
| TCONS_00025693 | 1.12904 | -1.41344   | -0.700932  | BGIOSGA015858 | XP_002463377.1 uncharacterized protein LOC8078539                                         |
| TCONS_00003121 | 1.12936 | 1.02865    | 2.6843     | BGIOSGA002103 | XP_015688080.1PREDICTED: uncharacterized protein LOC102715905                             |
| TCONS_00015759 | 1.12971 | -1.33789   | 0.136151   | #N/A          | #N/A                                                                                      |
| TCONS_00016670 | 1.13002 | -7.34296   | -0.217221  | BGIOSGA010904 | XP_006653796.1 kinesin-5-like                                                             |
| TCONS_00014857 | 1.13115 | #NA        | 1.71764    | BGIOSGA002958 | XP_015691936.1PREDICTED: uncharacterized protein LOC107304086                             |
| TCONS_00010676 | 1.13115 | -0.340022  | 0.132674   | BGIOSGA013301 | XP_021306794.1 uncharacterized protein LOC8056728                                         |
| TCONS_00007059 | 1.13128 | 0.531072   | 1.5993     | BGIOSGA009240 | XP_006648076.1PREDICTED: uncharacterized protein LOC102707841                             |
| TCONS_00030439 | 1.13131 | -1.25704   | 1.97603    | BGIOSGA032062 | XP_015696847.1 myb-related protein Hv1-like                                               |
| TCONS_00017786 | 1.13163 | 1.20296    | 0.845126   | BGIOSGA001050 | XP_004962137.1 transcription termination factor MTERF4, chloroplastic                     |
| TCONS_00021485 | 1.13194 | 0.287173   | 0.579276   | BGIOSGA008598 | XP_010228076.1 uncharacterized protein LOC100841062                                       |
| TCONS_00032177 | 1.13252 | 3.65792    | #NA        | #N/A          | #N/A                                                                                      |
| TCONS_00022678 | 1.13277 | 0.815249   | 1.20504    | BGIOSGA020763 | XP_006656317.1 U5 small nuclear ribonucleoprotein 40 kDa protein                          |
| TCONS_00006832 | 1.13312 | 1.10544    | 1.55739    | BGIOSGA004700 | XP_006647854.1 pentatricopeptide repeat-containing protein At2g13600-like                 |
| TCONS_00010899 | 1.13385 | 3.61017    | 2.58545    | BGIOSGA033889 | XP_002466510.1 uncharacterized protein LOC8059942                                         |
| TCONS_00017213 | 1.13443 | -0.987749  | -1.0022    | BGIOSGA030042 | XP_015692496.1 phosphoenolpyruvate/phosphate translocator 3, chloroplastic-like           |
| TCONS_00004929 | 1.13451 | 0.471571   | 0.615915   | BGIOSGA000292 | XP_002458950.1 uncharacterized protein LOC8078704                                         |
| TCONS_00016407 | 1.13516 | -1.34589   | 1.70782    | BGIOSGA007044 | XP_015691538.1 branched-chain-amino-acid aminotransferase 5, chloroplastic-like           |
| TCONS_00024499 | 1.13516 | 0.560997   | 0.444787   | BGIOSGA012179 | XP_015695391.1 phytoalexin 4-like                                                         |
| TCONS_00017373 | 1.13613 | 0.952601   | 1.60893    | BGIOSGA017555 | XP_006576121.1B3 domain-containing protein At3g25182                                      |
| TCONS_00000796 | 1.13663 | 0.610854   | 1.59209    | BGIOSGA028078 | XP_006645833.2 CRS2-associated factor 2, chloroplastic                                    |
| TCONS_00025821 | 1.13727 | 2.44108    | 1.54856    | BGIOSGA027813 | XP_015689043.1 RNA-binding protein CP29B, chloroplastic                                   |
| TCONS_00001100 | 1.13764 | 0.972538   | 0.11681    | BGIOSGA012381 | NP_001130329.1 uncharacterized protein LOC100191424                                       |
| TCONS_00028681 | 1.13764 | 2.65061    | 0.11681    | BGIOSGA018386 | XP_006660497.1 ras-related protein RGP1                                                   |
| TCONS_00018662 | 1.13781 | 0.477454   | 0.806257   | BGIOSGA019962 | XP_006654074.1 universal stress protein A-like protein                                    |
| TCONS_00023647 | 1.13858 | 2.63758    | 0.63605    | BGIOSGA014534 | XP_006657683.2 protein argonaute 18-like                                                  |
| TCONS_00029132 | 1.13863 | 0.0420213  | 0.478062   | BGIOSGA003942 | XP_003578208.1 STOREKEEPER protein                                                        |
| TCONS_00013110 | 1.13879 | 0.848431   | 0.0777023  | BGIOSGA009876 | XP_004981899.1 uncharacterized protein LOC101786698                                       |
| TCONS_00020826 | 1.13883 | -0.351018  | 0.113924   | BGIOSGA035562 | NP_001151100.1VQ motif family protein                                                     |
| TCONS_00009331 | 1.13892 | 1.52565    | 1.32157    | BGIOSGA011875 | XP_015690315.1 ribosomal large subunit pseudouridine synthase B isoform X2                |
| TCONS_00036912 | 1.13926 | 0.697902   | 1.11502    | BGIOSGA016258 | XP_004960722.1 probable aspartyl aminopeptidase                                           |
| TCONS_00011287 | 1.13959 | 1.55069    | 1.29399    | BGIOSGA017959 | XP_006650863.1 ferredoxin-3, chloroplastic-like isoform X2                                |
| TCONS_00035957 | 1.13999 | #NA        | #NA        | BGIOSGA003344 | XP_006663988.2PREDICTED: uncharacterized protein LOC102710357 isoform X2                  |
| TCONS_00007651 | 1.13999 | 0.64742    | #NA        | BGIOSGA003742 | XP_010234075.1 uncharacterized protein LOC100842455 isoform X2                            |
| TCONS_00000634 | 1.14017 | 2.85246    | -0.0111675 | BGIOSGA027484 | XP_022682015.1 putative serpin-Z12                                                        |
| TCONS_00006259 | 1.1408  | 0.196215   | -0.124376  | BGIOSGA006729 | XP_003579789.1 uncharacterized protein LOC100839050                                       |
| TCONS_00022000 | 1.14083 | 0.0626788  | 0.246417   | BGIOSGA023252 | XP_003563993.11-aminocyclopropane-1-carboxylate oxidase homolog 4                         |
| TCONS_00023117 | 1.14096 | -2.31739   | -0.256683  | BGIOSGA025153 | XP_006657445.1 photosystem I reaction center subunit psaK, chloroplastic                  |
| TCONS_00024262 | 1.14129 | 1.43602    | 1.63378    | BGIOSGA026773 | XP_004958542.1 probable glycosyltransferase STELLO1                                       |
| TCONS_00003314 | 1.14138 | 1.40391    | 1.90597    | BGIOSGA013090 | XP_006644057.2 presenilin-like protein At1g08700                                          |
| TCONS_00010291 | 1.1414  | -0.0746975 | 0.980209   | BGIOSGA012855 | XP_006650190.1PREDICTED: uncharacterized protein LOC102720218                             |
| TCONS_00035543 | 1.14152 | 1.58712    | 0.613762   | BGIOSGA036960 | XP_021317106.1 uncharacterized protein LOC8085629                                         |
| TCONS_00006017 | 1.14176 | 0.367357   | 0.765427   | BGIOSGA008166 | XP_006647310.1 prefoldin subunit 1                                                        |
| TCONS_00006584 | 1.14217 | 2.64448    | 2.10578    | BGIOSGA003742 | XP_021314032.1 protein NUCLEAR FUSION DEFECTIVE 6, chloroplastic/mitochondrial isoform X1 |
| TCONS_00009675 | 1.14326 | 0.205864   | -0.391378  | BGIOSGA006560 | XP_006649727.1 probable 4-hydroxy-tetrahydrodipicolinate reductase 2, chloroplastic       |
| TCONS_00029166 | 1.14362 | 0.619909   | -0.950821  | BGIOSGA029627 | XP_015696813.1 2-hydroxyisoflavanone dehydratase-like                                     |

## transcriptome

|                |         |           |           |               |                                                                                                                                                                                                             |
|----------------|---------|-----------|-----------|---------------|-------------------------------------------------------------------------------------------------------------------------------------------------------------------------------------------------------------|
| TCONS_00022833 | 1.14406 | 1.43619   | 0.458547  | BGIOSGA020614 | XP_015693911.1PREDICTED: LOW QUALITY PROTEIN: uncharacterized protein LOC102699872                                                                                                                          |
| TCONS_00004120 | 1.14423 | 4.54866   | #NA       | BGIOSGA004060 | XP_002458271.1protein RADIALIS-like 3 XP_015691668.1 DNA-directed RNA polymerases II and IV subunit 5A-like isoform X2 XP_002443019.1glucuronoxylan 4-O-methyltransferase 1                                 |
| TCONS_00016138 | 1.14427 | 2.55406   | 1.57021   | BGIOSGA000630 | XP_006647500.2 protein GrpE-like XP_006649958.1 argininosuccinate lyase, chloroplastic XP_003557140.1uncharacterized protein LOC100833108                                                                   |
| TCONS_00011985 | 1.14485 | 0.86696   | 0.149727  | BGIOSGA002448 |                                                                                                                                                                                                             |
| TCONS_00006445 | 1.14492 | 2.08453   | 1.61261   | BGIOSGA015089 | XP_006647500.2 protein GrpE-like XP_006649958.1 argininosuccinate lyase, chloroplastic                                                                                                                      |
| TCONS_00009903 | 1.14493 | 1.48121   | 2.2863    | BGIOSGA012458 | XP_003557140.1uncharacterized protein LOC100833108                                                                                                                                                          |
| TCONS_00020060 | 1.1452  | -0.359498 | 0.0983329 | BGIOSGA005386 |                                                                                                                                                                                                             |
| TCONS_00018098 | 1.14568 | -0.02498  | 0.31534   | BGIOSGA020152 | XP_006654619.1 thioredoxin H-type-like XP_006663327.1PREDICTED: uncharacterized protein LOC102703438, partial                                                                                               |
| TCONS_00034593 | 1.14586 | 1.01532   | -0.394323 | BGIOSGA034226 |                                                                                                                                                                                                             |
| TCONS_00027600 | 1.14615 | 0.639286  | 2.1159    | #N/A          | #N/A                                                                                                                                                                                                        |
| TCONS_00019282 | 1.14669 | 1.28581   | 1.5083    | BGIOSGA035760 | XP_015693272.1 lipase-like XP_004952609.1COPII coat assembly protein SEC16                                                                                                                                  |
| TCONS_00015829 | 1.14693 | -1.20153  | -0.971513 | BGIOSGA006831 | XP_002445860.1pentatricopeptide repeat-containing protein At3g42630 XP_006659152.1 NADH dehydrogenase [ubiquinone] iron-sulfur protein 6, mitochondrial XP_021307183.1mitotic-spindle organizing protein 1B |
| TCONS_00028315 | 1.14701 | 1.48739   | 0.522878  | BGIOSGA026658 |                                                                                                                                                                                                             |
| TCONS_00025953 | 1.14756 | 0.544954  | 0.964906  | BGIOSGA028029 |                                                                                                                                                                                                             |
| TCONS_00013446 | 1.14797 | 0.636994  | 0.091547  | BGIOSGA010474 |                                                                                                                                                                                                             |
| TCONS_00019280 | 1.14797 | -0.363006 | #NA       | #N/A          | #N/A                                                                                                                                                                                                        |
| TCONS_00031285 | 1.14797 | 0.221956  | 0.676509  | #N/A          | #N/A                                                                                                                                                                                                        |
| TCONS_00006194 | 1.14816 | 0.536882  | 1.10298   | BGIOSGA007658 | XP_004954965.1protein BIC1                                                                                                                                                                                  |
| TCONS_00024169 | 1.1488  | 0.268259  | 0.634593  | BGIOSGA003693 | XP_006658004.1 ras-related protein RABA5a XP_022680191.1bifunctional dihydrofolate reductase-thymidylate synthase isoform X1                                                                                |
| TCONS_00033474 | 1.14956 | 1.49185   | 1.45076   | BGIOSGA036259 | XP_003572276.1counting factor 45-1 XP_006647605.1 aldehyde dehydrogenase family 3 member F1-like                                                                                                            |
| TCONS_00030137 | 1.14969 | 1.88282   | 0.894706  | BGIOSGA023727 | XP_015689402.1 3-isopropylmalate dehydratase small subunit 3-like                                                                                                                                           |
| TCONS_00008487 | 1.15051 | 1.95582   | 1.08534   | BGIOSGA008719 | XP_010232525.1uncharacterized protein LOC100826416 isoform X1                                                                                                                                               |
| TCONS_00008514 | 1.15084 | 0.54242   | 0.99551   | BGIOSGA013173 | XP_015691687.1 anthocyanidin reductase-like XP_022685583.1protein SAMBA                                                                                                                                     |
| TCONS_00012739 | 1.1513  | -0.367061 | 1.0834    | BGIOSGA010224 | XP_006643757.1 putative disease resistance RPP13-like protein 1                                                                                                                                             |
| TCONS_00015010 | 1.1513  | -0.367061 | 0.668358  | BGIOSGA026791 | XP_003558058.1uncharacterized protein LOC100826796                                                                                                                                                          |
| TCONS_00032769 | 1.1513  | -0.030026 | 0.294899  | BGIOSGA031341 | XP_004957682.1vacuolar protein sorting-associated protein 24 homolog 1 XP_021306985.1U-box domain-containing protein 15 isoform X2                                                                          |
| TCONS_00002827 | 1.15175 | 0.801999  | 0.548726  | BGIOSGA037630 | XP_006649072.1PREDICTED: uncharacterized protein LOC102713247 XP_024314393.1DEAD-box ATP-dependent RNA helicase 15 isoform X1                                                                               |
| TCONS_00012148 | 1.15207 | #NA       | -0.333533 | BGIOSGA010864 | XP_015688255.1 zinc finger CCCH domain-containing protein 2-like                                                                                                                                            |
| TCONS_00025088 | 1.15281 | 0.331674  | 0.332868  | BGIOSGA011681 | XP_006651971.2 protein NRT1/ PTR FAMILY 5.6-like                                                                                                                                                            |
| TCONS_00031486 | 1.15303 | 2.49572   | 0.64301   | BGIOSGA025907 | XP_006655644.2 pentatricopeptide repeat-containing protein At4g01030, mitochondrial XP_015692049.1 ER membrane protein complex subunit 6 isoform X1                                                         |
| TCONS_00006927 | 1.15348 | 1.2527    | 1.18587   | BGIOSGA034214 | XP_006647025.1 chlorophyll a-b binding protein 8, chloroplastic                                                                                                                                             |
| TCONS_00001111 | 1.15354 | 3.53718   | 2.07787   | BGIOSGA003736 | XP_004960278.11-aminocyclopropane-1-carboxylate oxidase XP_004951184.1small nuclear ribonucleoprotein SmD3b                                                                                                 |
| TCONS_00003001 | 1.15512 | 2.30896   | 1.5776    | BGIOSGA019112 | XP_004983172.1probable prolyl 4-hydroxylase 7 XP_004967389.2uncharacterized protein LOC101762180                                                                                                            |
| TCONS_00000976 | 1.1556  | 0.627912  | 2.07278   | BGIOSGA010029 | XP_006651124.1 inositol-3-phosphate synthase XP_006659583.1 calvin cycle protein CP12-3, chloroplastic-like                                                                                                 |
| TCONS_00018410 | 1.15572 | 2.48997   | 2.036     | BGIOSGA020462 | XP_015693866.1 peptidyl-prolyl cis-trans isomerase CYP18-1                                                                                                                                                  |
| TCONS_00001582 | 1.15624 | 0.423644  | 0.697717  | BGIOSGA010645 | XP_015688731.1 methyltransferase-like protein 7A                                                                                                                                                            |
| TCONS_00007538 | 1.15648 | 1.84466   | 0.400317  | BGIOSGA000168 | XP_015694366.1PREDICTED: uncharacterized protein LOC102705259 isoform X2                                                                                                                                    |
| TCONS_00009662 | 1.15687 | 1.69686   | 1.65457   | BGIOSGA018172 | XP_006646906.1PREDICTED: uncharacterized protein LOC102717676                                                                                                                                               |
| TCONS_00032210 | 1.1569  | 2.39141   | 1.74678   | BGIOSGA024672 | XP_006661190.1 protein ELF4-LIKE 4-like XP_006656275.1 sodium-coupled neutral amino acid transporter 2-like                                                                                                 |
| TCONS_00035710 | 1.15697 | 2.69853   | 1.73625   | BGIOSGA017530 | XP_015693548.1 dof zinc finger protein DOF3.1-like                                                                                                                                                          |
| TCONS_00011717 | 1.15743 | 3.67771   | 0.805306  | BGIOSGA032789 | XP_015693438.1 pentatricopeptide repeat-containing protein At5g08510                                                                                                                                        |
| TCONS_00028293 | 1.15809 | 0.277193  | 1.58118   | BGIOSGA012463 | XP_006659081.1 glyceraldehyde-3-phosphate dehydrogenase 1, cytosolic                                                                                                                                        |
| TCONS_00020055 | 1.15829 | 1.95515   | 1.50439   | BGIOSGA021664 | XP_006648407.1 peroxiredoxin-2E-2, chloroplastic                                                                                                                                                            |
| TCONS_00006860 | 1.1588  | 1.20801   | 1.31981   | BGIOSGA009040 | XP_006646318.1 serine/threonine-protein kinase HT1-like                                                                                                                                                     |
| TCONS_00020934 | 1.15979 | 1.0383    | -0.135979 | BGIOSGA023148 |                                                                                                                                                                                                             |
| TCONS_00005470 | 1.15995 | 0.828194  | 2.20292   | BGIOSGA020656 |                                                                                                                                                                                                             |
| TCONS_00026477 | 1.16033 | 1.62266   | 2.13145   | BGIOSGA005567 |                                                                                                                                                                                                             |
| TCONS_00021087 | 1.16042 | 0.319872  | 1.35574   | BGIOSGA022688 |                                                                                                                                                                                                             |
| TCONS_00020532 | 1.16085 | 0.399705  | 0.0597561 | BGIOSGA013062 |                                                                                                                                                                                                             |
| TCONS_00020034 | 1.16096 | 1.53298   | 1.35474   | BGIOSGA015078 |                                                                                                                                                                                                             |
| TCONS_00025845 | 1.16107 | 2.10308   | 1.3271    | BGIOSGA016539 |                                                                                                                                                                                                             |
| TCONS_00007516 | 1.16109 | 2.18995   | 0.469918  | BGIOSGA001967 |                                                                                                                                                                                                             |
| TCONS_00004384 | 1.16127 | 0.707405  | 0.619267  | BGIOSGA020205 |                                                                                                                                                                                                             |

transcriptome

|                |         |           |           |               |                                                                                     |
|----------------|---------|-----------|-----------|---------------|-------------------------------------------------------------------------------------|
| TCONS_00020684 | 1.16137 | -1.70038  | -0.941512 | BGIOSGA028801 | XP_006656957.1 GDSL esterase/lipase EXL1-like                                       |
| TCONS_00000447 | 1.16159 | 0.751278  | 0.210505  | BGIOSGA022097 | XP_006643922.1 PREDICTED: uncharacterized protein LOC102718874                      |
| TCONS_00013001 | 1.16162 | 1.03466   | 0.869584  | BGIOSGA009985 | XP_006651727.1 N-alpha-acetyltransferase 20                                         |
| TCONS_00023696 | 1.16187 | 1.62102   | 3.14472   | BGIOSGA018057 | XP_006653490.1 pentatricopeptide repeat-containing protein At4g39952, mitochondrial |
| TCONS_00026755 | 1.16187 | 2.42837   | 1.64222   | #N/A          | #N/A                                                                                |
| TCONS_00033960 | 1.1621  | 2.47788   | 1.7914    | BGIOSGA034666 | XP_006664864.2 PREDICTED: uncharacterized protein LOC102701411                      |
| TCONS_00020217 | 1.16227 | 0.173476  | 0.528056  | BGIOSGA018242 | XP_006655843.1 sulfiredoxin, chloroplastic/mitochondrial                            |
| TCONS_00004975 | 1.16272 | 0.580899  | 0.821033  | BGIOSGA000244 | XP_006645234.1 small ubiquitin-related modifier 1                                   |
| TCONS_00005483 | 1.16283 | 1.94193   | 3.96177   | #N/A          | #N/A                                                                                |
| TCONS_00035370 | 1.16307 | -0.628624 | -0.306087 | BGIOSGA035681 | XP_015698038.1 beta-glucosidase-like SFR2, chloroplastic                            |
| TCONS_00029531 | 1.16386 | 1.71181   | 0.327982  | BGIOSGA031289 | XP_015696715.1 monodehydroascorbate reductase                                       |
| TCONS_00004791 | 1.16398 | 0.598038  | 1.25503   | BGIOSGA000425 | XP_006646508.1 PREDICTED: uncharacterized protein LOC102701050                      |
| TCONS_00011960 | 1.1646  | 2.31858   | 0.635441  | BGIOSGA019949 | XP_006649800.1 josephin-like protein                                                |
| TCONS_00029672 | 1.16481 | 0.346268  | -1.10043  | BGIOSGA014924 | XP_006660466.1 indole-3-glycerol phosphate synthase, chloroplastic-like             |
| TCONS_00027133 | 1.16509 | 0.774209  | 0.777982  | BGIOSGA014864 | XP_003574920.1 protein-L-isoaspartate O-methyltransferase 1 isoform X2              |
| TCONS_00011259 | 1.16581 | 0.616857  | 0.0474479 | BGIOSGA013865 | XP_014751942.1 uncharacterized protein LOC100831283                                 |
| TCONS_00015641 | 1.16581 | -2.12011  | 1.67972   | BGIOSGA040713 | XP_022685469.1 uncharacterized protein LOC101776219                                 |
| TCONS_00022158 | 1.16645 | -0.326035 | 0.692892  | BGIOSGA007023 | XP_006656041.1 thioredoxin-like protein Clot                                        |
| TCONS_00036178 | 1.16657 | #N/A      | -0.954455 | BGIOSGA026618 | XP_004962821.1 rapid alkalization factor                                            |
| TCONS_00036260 | 1.16685 | 2.28474   | 0.962345  | BGIOSGA019672 | XP_006664116.1 importin subunit beta-1                                              |
| TCONS_00022816 | 1.16737 | -0.596926 | 0.358964  | BGIOSGA031468 | XP_006656408.1 probable calcium-binding protein CML29                               |
| TCONS_00026331 | 1.16785 | 0.264975  | 0.385115  | BGIOSGA028412 | XP_006659271.1 protein MEMO1 isoform X1                                             |
| TCONS_00005952 | 1.16798 | #N/A      | 0.0419932 | BGIOSGA003241 | XP_004952376.1 protein FON2 SPARE1                                                  |
| TCONS_00001647 | 1.16798 | 1.19951   | 1.04199   | BGIOSGA021863 | XP_015691557.1 nuclear poly(A) polymerase 2-like                                    |
| TCONS_00026458 | 1.16831 | -1.38581  | -1.95885  | BGIOSGA028527 | XP_004983194.1 uncharacterized protein LOC101754068                                 |
| TCONS_00016669 | 1.16863 | 0.13076   | 0.549029  | BGIOSGA014295 | XP_006652865.1 thioredoxin-like protein CXXS1                                       |
| TCONS_00004577 | 1.16863 | 1.93577   | 2.04033   | #N/A          | #N/A                                                                                |
| TCONS_00017286 | 1.17014 | -0.387789 | 0.036496  | BGIOSGA008713 | NP_001152623.1 Grx_A2 - glutaredoxin subgroup III                                   |
| TCONS_00035093 | 1.17015 | 1.2505    | 1.3462    | BGIOSGA033747 | XP_015697705.1 E3 ubiquitin-protein ligase RNF181-like                              |
| TCONS_00014173 | 1.17054 | -1.92678  | -1.70387  | BGIOSGA016331 | NP_001142209.13-beta hydroxysteroid dehydrogenase/isomerase family protein          |
| TCONS_00002408 | 1.1707  | 1.19657   | 0.772044  | #N/A          | #N/A                                                                                |
| TCONS_00017649 | 1.17079 | 2.69813   | 2.72253   | BGIOSGA023731 | XP_015693318.1 serine/arginine-rich-splicing factor SR34-like isoform X2            |
| TCONS_00037457 | 1.17175 | 2.55799   | 2.43452   | BGIOSGA012625 | XP_015698612.1 PREDICTED: uncharacterized protein LOC107305446                      |
| TCONS_00008495 | 1.17248 | -0.197696 | 3.00458   | BGIOSGA014629 | XP_015689610.1 metal-nicotinamine transporter YSL2                                  |
| TCONS_00015432 | 1.17267 | 1.77742   | -0.457915 | BGIOSGA014315 | XP_015691680.1 vacuolar amino acid transporter 1-like                               |
| TCONS_00003828 | 1.17294 | 1.77907   | 2.61437   | BGIOSGA018218 | XP_006644258.1 secretory carrier-associated membrane protein 5                      |
| TCONS_00029173 | 1.17294 | 2.45045   | 1.14488   | BGIOSGA030921 | XP_015696382.1 2-hydroxyisoflavanone dehydratase-like                               |
| TCONS_00033244 | 1.17316 | 2.19386   | 1.6138    | #N/A          | #N/A                                                                                |
| TCONS_00017752 | 1.17359 | 1.96704   | 1.35757   | BGIOSGA019814 | XP_006655288.1 protein PALE CRESS, chloroplastic                                    |
| TCONS_00027621 | 1.17367 | 1.46908   | 2.2409    | BGIOSGA022636 | XP_006659230.1 cytosolic sulfotransferase 8-like                                    |
| TCONS_00008843 | 1.17421 | -1.12925  | 0.0261742 | BGIOSGA005573 | XP_002454591.1 sprouty-related, EVH1 domain-containing protein 3                    |
| TCONS_00000180 | 1.17447 | 1.71104   | 1.72117   | BGIOSGA025077 | XP_004968155.1 AP2/ERF and B3 domain-containing protein Os01g0141000                |
| TCONS_00007709 | 1.17534 | 1.41378   | 1.02331   | BGIOSGA012235 | XP_014660900.1 E3 ubiquitin-protein ligase EL5                                      |
| TCONS_00000983 | 1.17569 | -0.130945 | 0.507853  | BGIOSGA032514 | XP_015698079.1 tRNA (guanine(37)-N1)-methyltransferase 1                            |
| TCONS_00020045 | 1.17635 | 0.605253  | 0.480186  | BGIOSGA022227 | NP_001147665.139S ribosomal protein L47                                             |
| TCONS_00019631 | 1.17711 | 1.41171   | 2.34076   | BGIOSGA000816 | XP_015692968.1 28 kDa heat- and acid-stable phosphoprotein-like                     |
| TCONS_00015772 | 1.17711 | -1.13261  | 1.60379   | #N/A          | #N/A                                                                                |
| TCONS_00007173 | 1.17742 | 0.0393948 | 0.449957  | BGIOSGA020178 | XP_022683865.1 rac-like GTP-binding protein 5                                       |
| TCONS_00016089 | 1.17767 | 2.51058   | 1.60237   | BGIOSGA014890 | XP_015691737.1 PREDICTED: uncharacterized protein LOC102721636                      |
| TCONS_00017214 | 1.1778  | -1.39647  | -0.982931 | BGIOSGA002867 | XP_010231664.1 embryo-specific protein ATS3A                                        |
| TCONS_00028260 | 1.1778  | 0.478002  | 0.754034  | BGIOSGA026718 | XP_006660257.2 pseudouridine-5'-phosphate glycosidase                               |
| TCONS_00016792 | 1.1778  | 4.33145   | 1.60203   | BGIOSGA027488 | XP_015694711.1 probable WRKY transcription factor 3                                 |
| TCONS_00013140 | 1.17831 | 2.03587   | -0.7212   | BGIOSGA034068 | XP_006650557.1 magnesium-dependent phosphatase 1-like                               |
| TCONS_00035798 | 1.17868 | 2.03543   | 2.33677   | BGIOSGA021915 | XP_006656638.1 RNA-binding protein 2-like                                           |
| TCONS_00030057 | 1.17868 | 2.05093   | 1.42988   | BGIOSGA029753 | XP_015696878.1 26S proteasome non-ATPase regulatory subunit 9                       |
| TCONS_00009413 | 1.17915 | 0.517968  | 1.51574   | BGIOSGA011967 | XP_006651090.2 omega-amidase, chloroplastic                                         |
| TCONS_00020912 | 1.17987 | 0.71649   | 1.51433   | BGIOSGA006859 | XP_003563721.1 GATA transcription factor 21                                         |

transcriptome

|                |         |           |           |              |                                                                                     |
|----------------|---------|-----------|-----------|--------------|-------------------------------------------------------------------------------------|
| TCONS_00014764 | 1.17987 | 1.45187   | 0.111363  | BGOSGA016940 | XP_021318118.1 uncharacterized protein LOC110436155                                 |
| TCONS_00009390 | 1.17987 | 0.688475  | 0.0118275 | BGOSGA031943 | XP_006651075.1 F-box/kelch-repeat protein At1g55270-like                            |
| TCONS_00025282 | 1.18071 | 1.22321   | 1.21539   | BGOSGA024143 | XP_006657802.1 54S ribosomal protein L24, mitochondrial                             |
| TCONS_00016652 | 1.18097 | 0.719393  | 1.5278    | BGOSGA014310 | XP_006656109.1 PREDICTED: uncharacterized protein LOC102702667 isoform X4           |
| TCONS_00028952 | 1.18099 | -0.989799 | 0.492616  | BGOSGA030708 | XP_006660604.1 annexin D5-like                                                      |
| TCONS_00007037 | 1.18122 | 1.80122   | 1.95727   | BGOSGA009222 | XP_006649136.1 uncharacterized GTP-binding protein YjiA-like                        |
| TCONS_00008120 | 1.18122 | 1.75202   | 3.41077   | BGOSGA025817 | NP_001148627.1 ATPase inhibitor isoform 1                                           |
| TCONS_00033043 | 1.18145 | -0.400947 | -0.477571 | BGOSGA000058 | XP_006662762.2 60S ribosomal protein L3-like                                        |
| TCONS_00024855 | 1.18145 | 3.27148   | 0.81521   | BGOSGA013892 | XP_003561273.1 NDR1/HIN1-like protein 10                                            |
| TCONS_00032476 | 1.18145 | 0.184015  | 0.329783  | BGOSGA016773 | XP_004986461.1 putative ripening-related protein 4                                  |
| TCONS_00034485 | 1.18182 | 1.50548   | 1.70736   | BGOSGA003294 | XP_006663283.1 F-box/LRR-repeat protein At3g59190-like                              |
| TCONS_00013089 | 1.18243 | 2.08967   | 2.7333    | BGOSGA032661 | XP_002463963.1 SKI family transcriptional corepressor 2                             |
| TCONS_00019564 | 1.18298 | 0.239231  | 1.9109    | BGOSGA029416 | NP_001146973.1 ethylene-responsive transcription factor 4                           |
| TCONS_00003091 | 1.18304 | 1.26948   | 1.39618   | BGOSGA014738 | XP_003565491.3 RING-H2 finger protein ATL39                                         |
| TCONS_00006466 | 1.18309 | 1.09948   | 0.878192  | BGOSGA008637 | XP_003575374.1 protein MIS12 homolog isoform X1                                     |
| TCONS_00018036 | 1.18326 | 1.01181   | -0.581655 | BGOSGA020083 | XP_024315322.1 uncharacterized protein At5g19025-like                               |
| TCONS_00008871 | 1.18331 | -0.403299 | 2.00317   | BGOSGA005541 | XP_006649077.1 PREDICTED: uncharacterized protein LOC102714624                      |
| TCONS_00031408 | 1.18331 | 1.0308    | 1.66775   | BGOSGA033220 | XP_015697122.1 PREDICTED: LOW QUALITY PROTEIN: uncharacterized protein LOC102706415 |
| TCONS_00010851 | 1.18347 | 0.181463  | 1.00278   | BGOSGA002218 | XP_006650510.1 transcription factor MYB44-like                                      |
| TCONS_00003752 | 1.18363 | 3.18127   | 1.70283   | BGOSGA017578 | XP_006644286.1 pentatricopeptide repeat-containing protein At4g38150                |
| TCONS_00016314 | 1.18372 | 0.333147  | 0.380656  | BGOSGA031583 | XP_006652575.1 vesicle-associated protein 1-2-like                                  |
| TCONS_00003791 | 1.18372 | 3.40354   | 2.11762   | BGOSGA033322 | XP_002455769.1 probable glutathione S-transferase GSTU6                             |
| TCONS_00023405 | 1.18382 | 0.988376  | 0.171826  | BGOSGA029560 | XP_003557348.1 DIMBOA UDP-glucosyltransferase BX8                                   |
| TCONS_00005447 | 1.18382 | 2.57588   | 1.35554   | BGOSGA037423 | XP_004958778.1 probable protein phosphatase 2C 33                                   |
| TCONS_00014316 | 1.18401 | 0.239676  | 0.116908  | BGOSGA000361 | XP_006652327.1 PHD finger protein ALFIN-LIKE 4-like                                 |
| TCONS_00006477 | 1.1841  | 1.28376   | 2.46064   | BGOSGA012222 | XP_006647539.1 myb-related protein Myb4-like                                        |
| TCONS_00027890 | 1.18419 | 1.07534   | 1.52282   | BGOSGA004250 | XP_004973277.1 lipid phosphate phosphatase 2                                        |
| TCONS_00014989 | 1.18428 | 0.469951  | 1.32269   | BGOSGA027926 | XP_006652854.1 BTB/POZ and MATH domain-containing protein 2-like                    |
| TCONS_00034152 | 1.18465 | 1.86803   | 1.41487   | BGOSGA036910 | XP_006663735.1 phosphoglucan phosphatase LSF2, chloroplastic-like                   |
| TCONS_00021246 | 1.18477 | 1.11843   | 0.806899  | #N/A         | #N/A                                                                                |
| TCONS_00019713 | 1.18499 | 2.21125   | 1.89945   | BGOSGA024580 | XP_006655539.1 PREDICTED: uncharacterized protein LOC102715310                      |
| TCONS_00030044 | 1.18527 | 1.56106   | 0.445751  | BGOSGA001222 | XP_012698877.1 zinc-finger homeodomain protein 9                                    |
| TCONS_00022892 | 1.18537 | 2.19402   | 1.52161   | BGOSGA011232 | XP_002438996.1 formin-like protein 3                                                |
| TCONS_00013445 | 1.18594 | 0.107955  | 0.511193  | BGOSGA012944 | XP_004981226.1 calmodulin-binding protein 60 A isoform X1                           |
| TCONS_00027583 | 1.18638 | 1.74483   | 2.03505   | BGOSGA032837 | XP_008781484.1 3-hydroxyacyl-[acyl-carrier-protein] dehydratase FabZ-like           |
| TCONS_00028169 | 1.18643 | -2.08531  | -1.41963  | BGOSGA013832 | XP_004973678.1 tuliposide A-converting enzyme 1, chloroplastic                      |
| TCONS_00004537 | 1.18659 | 1.63695   | 0.802355  | BGOSGA014933 | XP_006644822.1 peroxidase 1-like isoform X2                                         |
| TCONS_00030560 | 1.18661 | 1.24461   | 1.88803   | BGOSGA026495 | XP_006660994.2 probable uridine nucleosidase 2                                      |
| TCONS_00005293 | 1.18666 | 0.518475  | 1.19647   | BGOSGA010367 | XP_006646796.1 GDSL esterase/lipase At5g55050-like                                  |
| TCONS_00032725 | 1.18691 | 0.945792  | 0.524717  | BGOSGA018418 | XP_021311758.1 BOI-related E3 ubiquitin-protein ligase 1 isoform X1                 |
| TCONS_00016580 | 1.18725 | 1.08111   | 1.5597    | BGOSGA007653 | XP_006652788.1 PREDICTED: uncharacterized protein LOC102717240 isoform X1           |
| TCONS_00024449 | 1.18738 | 0.524592  | 0.944261  | BGOSGA025029 | XP_006648343.1 PREDICTED: uncharacterized protein LOC102716192                      |
| TCONS_00017207 | 1.18748 | 1.34633   | 1.38511   | BGOSGA002856 | XP_006655036.1 autophagy-related protein 18d-like                                   |
| TCONS_00015494 | 1.18752 | 1.39409   | 1.4261    | BGOSGA008773 | XP_015698867.1 probable aquaporin PIP2-6                                            |
| TCONS_00000032 | 1.18756 | 1.26941   | 2.42556   | BGOSGA017200 | XP_004967934.1 transcription factor bHLH110 isoform X1                              |
| TCONS_00037123 | 1.18776 | -0.167903 | 0.620133  | BGOSGA029046 | XP_006664537.1 sulfite oxidase-like                                                 |
| TCONS_00026879 | 1.18832 | 1.79202   | 0.990714  | BGOSGA012996 | XP_015695783.1 pentatricopeptide repeat-containing protein At1g80150, mitochondrial |
| TCONS_00002965 | 1.18907 | 2.01265   | 1.17328   | BGOSGA002251 | XP_015696117.1 DDT domain-containing protein DDR4-like                              |
| TCONS_00005573 | 1.18908 | 1.03      | 1.73607   | BGOSGA017000 | XP_006646991.2 premnaspirodiene oxygenase-like                                      |
| TCONS_00032458 | 1.18913 | -0.785027 | 0.742078  | BGOSGA025921 | XP_004982787.1 cytochrome P450 86B1                                                 |
| TCONS_00008687 | 1.1892  | 1.23313   | 1.44796   | BGOSGA009821 | XP_004953674.13-hydroxy-3-methylglutaryl-coenzyme A reductase 1                     |
| TCONS_00009576 | 1.18924 | 1.04865   | 1.09276   | BGOSGA020258 | XP_015696667.1 F-box/LRR-repeat protein At4g14103-like                              |
| TCONS_00037417 | 1.18941 | 1.69335   | 2.05841   | BGOSGA020936 | XP_006664140.2 pentatricopeptide repeat-containing protein At3g29230-like           |

## transcriptome

|                |         |            |           |               |                                                                                                |
|----------------|---------|------------|-----------|---------------|------------------------------------------------------------------------------------------------|
| TCONS_00004250 | 1.1895  | 1.32586    | 1.17542   | BGIOSGA008123 | XP_015688088.1 phosphatidylinositol/phosphatidylcholine transfer protein SFH6-like             |
| TCONS_00023319 | 1.1906  | #NA        | -0.474974 | BGIOSGA013779 | XP_024313019.1 uncharacterized protein LOC112269860                                            |
| TCONS_00007409 | 1.19211 | 2.24853    | 1.0498    | BGIOSGA007064 | XP_002453359.14-hydroxyphenylpyruvate dioxygenase                                              |
| TCONS_00017505 | 1.19364 | 2.03037    | 1.0831    | BGIOSGA011003 | XP_006654412.1 guanosine nucleotide diphosphate dissociation inhibitor 2                       |
| TCONS_00010224 | 1.19429 | 0.218588   | 0.473515  | BGIOSGA014991 | XP_010491788.1 histone H3.3                                                                    |
| TCONS_00029372 | 1.19621 | 0.609965   | 1.09259   | BGIOSGA019011 | XP_015696474.1 ras-related protein RABA3-like                                                  |
| TCONS_00028482 | 1.19665 | -0.101067  | 0.370301  | BGIOSGA026474 | XP_021321181.1 bet1-like SNARE 1-1                                                             |
| TCONS_00003785 | 1.19884 | 0.550738   | 1.20645   | BGIOSGA001426 | XP_006644273.1 peptide deformylase 1A, chloroplastic                                           |
| TCONS_00028809 | 1.19934 | 1.07794    | 1.01158   | BGIOSGA030558 | XP_006660550.1 PREDICTED: uncharacterized protein LOC102715047                                 |
| TCONS_00002768 | 1.19941 | 0.362987   | 0.555027  | BGIOSGA020313 | XP_006645469.1 chloroplastic group IIB intron splicing facilitator CRS2, chloroplastic         |
| TCONS_00010726 | 1.19954 | 0.949318   | 0.997064  | BGIOSGA013350 | XP_003561186.1 uncharacterized protein LOC100820864                                            |
| TCONS_00011742 | 1.19975 | -0.902684  | -1.26359  | BGIOSGA011264 | XP_006651143.1 adenylyl-sulfate kinase 3                                                       |
| TCONS_00020616 | 1.20097 | -0.826223  | 0.899242  | BGIOSGA006945 | XP_004965344.1 chlorophyll a-b binding protein 1B-21, chloroplastic                            |
| TCONS_00016361 | 1.20325 | 1.29352    | 0.569488  | BGIOSGA016313 | XP_002448280.1 ethylene-responsive transcription factor 2                                      |
| TCONS_00017268 | 1.2044  | 0.121882   | 0.813741  | BGIOSGA017339 | XP_006653016.1 ubiquinone biosynthesis protein COQ4 homolog, mitochondrial                     |
| TCONS_00020220 | 1.20526 | 1.3221     | 0.363832  | BGIOSGA022411 | XP_020399691.1 cytochrome b-c1 complex subunit 8                                               |
| TCONS_00021471 | 1.2056  | 0.366806   | 0.270251  | BGIOSGA022078 | XP_006655706.1 bark storage protein A-like                                                     |
| TCONS_00003299 | 1.20705 | 0.962686   | 1.02055   | BGIOSGA001914 | XP_006645756.2 ATP-dependent Clp protease proteolytic subunit-related protein 4, chloroplastic |
| TCONS_00000067 | 1.20717 | -1.94175   | 0.102234  | BGIOSGA002531 | XP_015695577.1 PREDICTED: uncharacterized protein LOC107304718                                 |
| TCONS_00005148 | 1.2103  | 1.11983    | 1.08787   | BGIOSGA005021 | XP_006645350.1 VAMP-like protein YKT61                                                         |
| TCONS_00033488 | 1.21059 | 0.976911   | 0.228668  | BGIOSGA021834 | XP_006663457.1 PREDICTED: uncharacterized protein LOC102717196                                 |
| TCONS_00014642 | 1.21096 | 0.73153    | 1.60524   | BGIOSGA016799 | XP_006652546.1 UPF0426 protein At1g28150, chloroplastic isoform X1                             |
| TCONS_00023911 | 1.21167 | -0.930437  | -0.177271 | BGIOSGA014976 | XP_006657834.1 chlorophyll a-b binding protein of LHCII type III, chloroplastic                |
| TCONS_00033353 | 1.21168 | -0.0627878 | 0.851083  | BGIOSGA034092 | XP_003576076.1 exosome complex component RRP43                                                 |
| TCONS_00016306 | 1.21302 | 2.39571    | 1.26135   | BGIOSGA025974 | XP_006652561.2 L-type lectin-domain containing receptor kinase IV.1-like                       |
| TCONS_00028787 | 1.21469 | -0.563295  | -0.561198 | BGIOSGA013431 | XP_006661132.1 submaxillary gland androgen-regulated protein 3A-like                           |
| TCONS_00005145 | 1.21529 | 0.044731   | 0.937187  | BGIOSGA034879 | XP_006645352.1 syntaxin-61                                                                     |
| TCONS_00036909 | 1.21541 | 0.283937   | -0.118384 | BGIOSGA029552 | XP_015698760.1 PREDICTED: uncharacterized protein LOC102711391                                 |
| TCONS_00036763 | 1.21557 | 0.209651   | 1.15812   | BGIOSGA036551 | XP_006664375.2 probable sodium/metabolite cotransporter BASS1, chloroplastic                   |
| TCONS_00033807 | 1.21588 | 0.0123095  | 0.886038  | BGIOSGA002418 | XP_015698131.1 peptidyl-prolyl cis-trans isomerase CYP23                                       |
| TCONS_00026431 | 1.21619 | 0.297362   | 1.51985   | BGIOSGA019256 | XP_002462138.2 phosphoenolpyruvate/phosphate translocator 1, chloroplastic                     |
| TCONS_00000753 | 1.21634 | 1.63799    | 2.13366   | BGIOSGA027194 | XP_015696176.1 PREDICTED: uncharacterized protein At4g37920, chloroplastic                     |
| TCONS_00028051 | 1.21859 | 0.527611   | -0.687629 | BGIOSGA026938 | XP_002445542.1 ATP-dependent Clp protease adapter protein CLPS1, chloroplastic isoform X1      |
| TCONS_00002450 | 1.2189  | 0.582551   | 0.921692  | BGIOSGA035577 | XP_006645264.1 E3 ubiquitin-protein ligase At3g02290-like isoform X1                           |
| TCONS_00002358 | 1.2192  | 1.29542    | 0.831141  | BGIOSGA004996 | XP_006646576.1 probable thimet oligopeptidase                                                  |
| TCONS_00004166 | 1.21932 | 0.371023   | 0.203227  | BGIOSGA023299 | XP_006644510.1 peroxiredoxin-2C                                                                |
| TCONS_00013876 | 1.22013 | 1.75392    | 0.725718  | BGIOSGA016055 | XP_003579514.1 CASP-like protein 2A1                                                           |
| TCONS_00011061 | 1.22047 | 1.36919    | 2.0643    | BGIOSGA013659 | XP_010229022.1 calmodulin-binding protein 60 D isoform X2                                      |
| TCONS_00002328 | 1.22079 | 0.697136   | 0.231811  | BGIOSGA038187 | XP_006645155.1 putative metallophosphoesterase At3g03305 isoform X1                            |
| TCONS_00030685 | 1.22096 | 2.16426    | 1.45199   | BGIOSGA032505 | XP_006660834.1 UPF0664 stress-induced protein C29B12.11c                                       |
| TCONS_00010863 | 1.22186 | 1.74862    | 1.86732   | BGIOSGA027574 | XP_006650517.1 BTB/POZ domain-containing protein At1g63850-like                                |
| TCONS_00020254 | 1.22271 | 2.41553    | 0.976581  | BGIOSGA013385 | XP_015694416.1 serine/arginine-rich splicing factor RSZ21A isoform X1                          |
| TCONS_00032817 | 1.22286 | -3.80268   | -0.155152 | BGIOSGA002203 | XP_006663716.1 protein trichome birefringence-like 34                                          |
| TCONS_00020408 | 1.22294 | -0.712633  | 0.634717  | BGIOSGA012085 | XP_024313389.1 uncharacterized protein LOC100833226                                            |
| TCONS_00004912 | 1.22353 | 1.65269    | 1.5278    | BGIOSGA037224 | XP_003564861.1 probable carboxylesterase 16                                                    |
| TCONS_00030014 | 1.22382 | 0.201132   | 0.286024  | BGIOSGA032873 | XP_004956770.1 putative 1-phosphatidylinositol-3-phosphate 5-kinase FAB1C                      |
| TCONS_00006122 | 1.22399 | -0.0654112 | -0.622267 | BGIOSGA015071 | NP_001147349.1 drought-induced protein 1 precursor                                             |
| TCONS_00023403 | 1.22417 | 2.73577    | 1.02577   | BGIOSGA028193 | XP_006658427.1 UDP-glycosyltransferase 76F1-like                                               |
| TCONS_00009966 | 1.22469 | 2.05379    | 1.89471   | BGIOSGA012520 | XP_015689872.1 guanylate kinase 2, chloroplastic/mitochondrial                                 |
| TCONS_00022191 | 1.22525 | 1.13756    | 1.1704    | BGIOSGA021307 | XP_004965459.1 translation initiation factor eIF-2B subunit gamma                              |
| TCONS_00035471 | 1.22572 | -0.187184  | -0.283814 | BGIOSGA023430 | XP_009411192.2 RING-H2 finger protein ATL73                                                    |
| TCONS_00025362 | 1.22644 | 0.016953   | 0.630358  | BGIOSGA024068 | XP_006658708.1 cytochrome c6, chloroplastic                                                    |
| TCONS_00031861 | 1.22836 | 0.459351   | 1.03693   | BGIOSGA030275 | XP_006661643.1 aldose 1-epimerase-like                                                         |

## transcriptome

|                |         |            |            |               |                                                                                              |
|----------------|---------|------------|------------|---------------|----------------------------------------------------------------------------------------------|
| TCONS_00027155 | 1.2284  | 1.22497    | 1.15756    | BGIOSGA029201 | XP_006659705.1 superoxide dismutase [Cu-Zn], chloroplastic                                   |
| TCONS_00035699 | 1.22866 | 1.33354    | 0.279931   | BGIOSGA037114 | XP_003576984.1 uncharacterized protein LOC100835766                                          |
| TCONS_00005221 | 1.22886 | 2.57203    | 1.91959    | BGIOSGA022066 | XP_021315832.1 ruBisCO large subunit-binding protein subunit beta, chloroplastic-like        |
| TCONS_00023209 | 1.22972 | 1.325      | 1.46003    | BGIOSGA025250 | XP_006658334.1 pentatricopeptide repeat-containing protein At4g20740                         |
| TCONS_00029246 | 1.22976 | 1.04008    | 1.98776    | BGIOSGA030988 | XP_006660753.1 PREDICTED: uncharacterized protein LOC102705839                               |
| TCONS_00002746 | 1.23172 | 0.996261   | 1.89787    | BGIOSGA002471 | XP_015692585.1 protein ABC17, chloroplastic                                                  |
| TCONS_00033737 | 1.23203 | 0.871244   | 1.49647    | BGIOSGA037408 | XP_015697706.1 50S ribosomal protein L4                                                      |
| TCONS_00021208 | 1.23208 | 0.948202   | 1.89166    | BGIOSGA035307 | XP_006657229.1 VQ motif-containing protein 22-like                                           |
| TCONS_00028579 | 1.23225 | 0.882865   | 0.512441   | BGIOSGA018932 | XP_006661039.1 probable plastid-lipid-associated protein 2, chloroplastic                    |
| TCONS_00011548 | 1.23234 | 2.56228    | 2.40604    | BGIOSGA017649 | XP_006651029.1 chaperonin CPN60-1, mitochondrial-like                                        |
| TCONS_00005705 | 1.23362 | 2.48406    | 1.41473    | BGIOSGA007826 | XP_023155958.1 endoribonuclease YBEY, chloroplastic isoform X1                               |
| TCONS_00012729 | 1.23476 | 1.76602    | 1.23198    | BGIOSGA033194 | XP_006650307.1 probable N-acetyl-gamma-glutamyl-phosphate reductase, chloroplastic           |
| TCONS_00006696 | 1.2358  | -0.0763458 | -0.607608  | BGIOSGA014433 | XP_006647733.1 phosphoribulokinase, chloroplastic                                            |
| TCONS_00009706 | 1.23741 | 0.548717   | 1.47722    | BGIOSGA012255 | XP_006649771.1 PREDICTED: uncharacterized protein DDB_G0275933                               |
| TCONS_00031440 | 1.23923 | 0.481308   | 1.12232    | BGIOSGA037819 | XP_021302625.1 uncharacterized protein LOC8065181                                            |
| TCONS_00011954 | 1.23958 | 1.91633    | 0.998633   | BGIOSGA011057 | XP_006651237.1 ASC1-like protein 3                                                           |
| TCONS_00001628 | 1.23979 | 0.273504   | 0.241882   | BGIOSGA006576 | XP_006644563.2 ABC transporter B family member 4-like                                        |
| TCONS_00010498 | 1.23985 | 1.50833    | 0.756955   | BGIOSGA013108 | XP_009621401.1 serine protease HTRA1-like isoform X3                                         |
| TCONS_00017551 | 1.2409  | 0.81016    | 0.948508   | BGIOSGA019625 | XP_006654262.1 superoxide dismutase [Mn], mitochondrial                                      |
| TCONS_00009119 | 1.24092 | 1.91463    | 0.879809   | BGIOSGA004785 | XP_006649220.2 PREDICTED: uncharacterized protein LOC102721622                               |
| TCONS_00027085 | 1.24136 | 0.681699   | -0.0396067 | #N/A          | #N/A                                                                                         |
| TCONS_00023420 | 1.24154 | 1.83272    | 1.30702    | BGIOSGA015163 | XP_006658437.1 calreticulin                                                                  |
| TCONS_00007492 | 1.24173 | 2.16102    | -0.858391  | BGIOSGA025531 | XP_003571042.4 putative UDP-glucose glucosyltransferase                                      |
| TCONS_00024064 | 1.24182 | 2.92455    | 1.29261    | BGIOSGA037241 | XP_006658788.2 flavonol sulfotransferase-like                                                |
| TCONS_00000401 | 1.24228 | 2.94584    | 0.906192   | BGIOSGA027082 | XP_006643893.2 SCAR-like protein 2                                                           |
| TCONS_00006264 | 1.24273 | 0.974573   | -0.288658  | BGIOSGA008425 | XP_006664957.1 PREDICTED: uncharacterized protein At1g32220, chloroplastic                   |
| TCONS_00032812 | 1.24336 | -4.1108    | 0.610747   | BGIOSGA009561 | XP_006663716.1 protein trichome birefringence-like 34                                        |
| TCONS_00002332 | 1.24362 | 2.11847    | 1.32157    | BGIOSGA004973 | XP_015699273.1 RHOMBOLD-like protein 13                                                      |
| TCONS_00027198 | 1.24428 | 1.90227    | 1.20591    | BGIOSGA025826 | XP_006659023.1 transmembrane protein 18-like                                                 |
| TCONS_00000384 | 1.24495 | -0.0522922 | 0.875443   | #N/A          | #N/A                                                                                         |
| TCONS_00031381 | 1.24562 | 1.75601    | 0.91063    | BGIOSGA004069 | XP_010234860.1 WAT1-related protein At3g02690, chloroplastic isoform X1                      |
| TCONS_00008007 | 1.24608 | 2.06545    | 1.74489    | BGIOSGA006471 | XP_015689014.1 PREDICTED: uncharacterized protein LOC102718711 isoform X2                    |
| TCONS_00032887 | 1.24737 | #N/A       | -1.59463   | BGIOSGA010812 | XP_01569895.1 probable apyrase 3                                                             |
| TCONS_00001894 | 1.24774 | 3.01971    | 2.19452    | BGIOSGA004528 | XP_006646367.2 protein PLASTID TRANSCRIPTIONALLY ACTIVE 12                                   |
| TCONS_00033309 | 1.24895 | -1.71931   | 0.393659   | BGIOSGA005584 | XP_002452518.1 uncharacterized protein LOC8066205                                            |
| TCONS_00013526 | 1.2492  | -0.101067  | -2.00708   | BGIOSGA009456 | XP_015690491.1 30S ribosomal protein S1                                                      |
| TCONS_00032126 | 1.25046 | 1.69824    | 0.758606   | BGIOSGA015024 | XP_024315508.1 red chlorophyll catabolite reductase isoform X1                               |
| TCONS_00006678 | 1.25055 | 0.23292    | 0.974565   | BGIOSGA008847 | XP_002454446.1 uncharacterized protein LOC8073893                                            |
| TCONS_00013442 | 1.25159 | 0.0670458  | 0.707498   | BGIOSGA022659 | XP_006651971.2 protein NRT1/ PTR FAMILY 5.6-like                                             |
| TCONS_00033684 | 1.25184 | #N/A       | -1.46722   | BGIOSGA001262 | XP_006663675.1 chalcone synthase-like                                                        |
| TCONS_00037350 | 1.25393 | 1.77295    | 1.48182    | BGIOSGA036018 | XP_014758823.1 putative pentatricopeptide repeat-containing protein At3g16890, mitochondrial |
| TCONS_00021368 | 1.2563  | 1.07884    | -0.325239  | BGIOSGA005853 | XP_003563555.1 B-box zinc finger protein 20                                                  |
| TCONS_00007789 | 1.25665 | 1.54       | 0.524391   | BGIOSGA036421 | XP_004952236.1 lactoylglutathione lyase GLX1                                                 |
| TCONS_00031951 | 1.25801 | 0.854295   | 1.06283    | #N/A          | XP_006662246.2 PREDICTED: uncharacterized protein LOC102708835                               |
| TCONS_00018253 | 1.25867 | 1.07585    | 1.57576    | BGIOSGA010573 | XP_006655549.2 pentatricopeptide repeat-containing protein At1g07740, mitochondrial          |
| TCONS_00028202 | 1.25899 | 1.09261    | 1.90353    | BGIOSGA004605 | XP_006660227.1 29 kDa ribonucleoprotein A, chloroplastic-like                                |
| TCONS_00002626 | 1.2602  | 0.603253   | 1.17085    | BGIOSGA037164 | XP_006645329.1 cytochrome b5-like                                                            |
| TCONS_00018343 | 1.26056 | 0.637184   | 0.879532   | BGIOSGA027613 | XP_006659149.1 THO complex subunit 7B-like isoform X2                                        |
| TCONS_00018320 | 1.26138 | 1.78799    | 1.75539    | BGIOSGA020373 | XP_006654798.1 PREDICTED: uncharacterized protein LOC102700432                               |
| TCONS_00026453 | 1.26195 | 0.311311   | -1.15862   | BGIOSGA028523 | XP_006660082.2 thylakoid membrane protein slr0575                                            |
| TCONS_00014328 | 1.26236 | 0.839308   | 1.339      | BGIOSGA006948 | XP_021319005.1 pentatricopeptide repeat-containing protein At1g09900 isoform X1              |
| TCONS_00004605 | 1.26475 | 0.229796   | 1.77889    | BGIOSGA022536 | XP_022682969.1 ABSCISIC ACID-INSENSITIVE 5-like protein 2                                    |
| TCONS_00009974 | 1.2658  | -0.248837  | 0.742754   | BGIOSGA037773 | XP_006650011.1 PREDICTED: uncharacterized protein LOC102713059                               |
| TCONS_00004400 | 1.26599 | -0.119687  | 1.24788    | BGIOSGA002024 | XP_006644711.1 GDSL esterase/lipase At4g10955-like                                           |
| TCONS_00028458 | 1.26638 | 0.380972   | 0.764221   | BGIOSGA000183 | XP_008678430.1 manganese-dependent ADP-ribose/CDP-alcohol diphosphatase                      |



## transcriptome

|                |         |            |            |               |                                                                                           |
|----------------|---------|------------|------------|---------------|-------------------------------------------------------------------------------------------|
| TCONS_00004478 | 1.26706 | 1.35027    | 0.403928   | BGIOSGA007536 | XP_022678517.1tyrosine decarboxylase 1 isoform X2                                         |
| TCONS_00026414 | 1.26753 | 0.269662   | 0.929895   | BGIOSGA028481 | XP_015696095.1PREDICTED: uncharacterized protein LOC102702586 isoform X1                  |
| TCONS_00019463 | 1.26805 | 1.17879    | 0.302346   | BGIOSGA017888 | XP_002451615.2uncharacterized protein LOC8076115                                          |
| TCONS_00024811 | 1.2693  | -0.0732922 | 0.633416   | BGIOSGA008351 | XP_015694577.1 THO complex subunit 4B-like                                                |
| TCONS_00018842 | 1.26976 | 2.31162    | 2.6857     | #N/A          | #N/A                                                                                      |
| TCONS_00024644 | 1.2715  | 1.97972    | 1.99129    | BGIOSGA024743 | XP_006658314.1 ADP-glucose phosphorylase                                                  |
| TCONS_00018273 | 1.27218 | 1.11714    | 1.90306    | BGIOSGA020181 | XP_006655573.2PREDICTED: uncharacterized protein LOC102701270                             |
| TCONS_00026632 | 1.27234 | 0.652116   | 1.46814    | BGIOSGA012082 | XP_003572204.1chaperonin-like RBCX protein 1, chloroplastic isoform X1                    |
| TCONS_00020092 | 1.27332 | -0.0845837 | 0.456261   | BGIOSGA022272 | XP_006656619.1 homeobox-leucine zipper protein HOX2-like                                  |
| TCONS_00027622 | 1.27364 | 1.17804    | 2.20547    | BGIOSGA027396 | XP_004972490.1AUGMIN subunit 1                                                            |
| TCONS_00033761 | 1.27375 | 1.45122    | 1.00157    | BGIOSGA032051 | XP_015697708.1 GTPase HflX                                                                |
| TCONS_00008110 | 1.2758  | 0.944592   | -0.201978  | BGIOSGA019946 | XP_006647333.1 60S acidic ribosomal protein P2A-like                                      |
| TCONS_00001442 | 1.27668 | 3.50326    | 1.04982    | BGIOSGA020384 | XP_006644418.1PREDICTED: uncharacterized protein LOC102701034                             |
| TCONS_00019970 | 1.27693 | -1.20333   | 0.0181064  | BGIOSGA022158 | XP_006656551.2 homeobox protein BEL1 homolog                                              |
| TCONS_00020685 | 1.27746 | -2.32625   | -0.174871  | BGIOSGA022879 | XP_006656957.1 GDSL esterase/lipase EXL1-like                                             |
| TCONS_00004047 | 1.27808 | 1.12315    | 1.08142    | BGIOSGA001147 | XP_015693482.1 peptide deformylase 1B, chloroplastic                                      |
| TCONS_00030807 | 1.27961 | 3.3005     | 1.89569    | BGIOSGA032615 | XP_003564521.1thioredoxin-like fold domain-containing protein MRL7 homolog, chloroplastic |
| TCONS_00030273 | 1.28035 | 3.09086    | 3.30074    | BGIOSGA005513 | XP_006661382.1 heat shock 70 kDa protein, mitochondrial-like                              |
| TCONS_00020079 | 1.28067 | 2.21836    | 1.78626    | BGIOSGA022259 | XP_004964480.1probable ribosome-binding factor A, chloroplastic                           |
| TCONS_00013556 | 1.28123 | 1.25444    | 1.83785    | BGIOSGA009419 | XP_006650916.2 cleavage and polyadenylation specificity factor subunit 3-1                |
| TCONS_00015112 | 1.28173 | 0.904807   | 0.363773   | BGIOSGA017292 | XP_010240553.1probable inactive UDP-arabinopyranose mutase 2 isoform X2                   |
| TCONS_00035760 | 1.28296 | 0.0742349  | 1.12532    | BGIOSGA037171 | XP_003578767.1outer envelope pore protein 37, chloroplastic isoform X2                    |
| TCONS_00025053 | 1.28404 | 0.89776    | 1.50731    | BGIOSGA024354 | XP_006657672.1 DNA-directed RNA polymerases II, IV and V subunit 6A-like                  |
| TCONS_00031426 | 1.2841  | 0.504569   | 0.350253   | BGIOSGA033240 | XP_006662497.1 valine-tRNA ligase, mitochondrial 1-like                                   |
| TCONS_00014476 | 1.28437 | 2.11576    | 1.33357    | BGIOSGA007628 | XP_006652435.1 glyceraldehyde-3-phosphate dehydrogenase 2, cytosolic                      |
| TCONS_00002434 | 1.28485 | 1.77339    | -0.01976   | BGIOSGA026745 | XP_004971093.1MADS-box transcription factor 51                                            |
| TCONS_00033139 | 1.28562 | -1.38779   | 0.451534   | BGIOSGA037103 | XP_006663273.1PREDICTED: uncharacterized protein LOC102705477                             |
| TCONS_00022334 | 1.28608 | 2.24469    | 0.888198   | BGIOSGA025174 | XP_006656114.1 peroxidase P7-like                                                         |
| TCONS_00005535 | 1.287   | 0.927066   | 2.07625    | BGIOSGA007644 | XP_015688469.1 secreted acidic protein 1A-like                                            |
| TCONS_00029379 | 1.28737 | -0.621764  | 0.360947   | BGIOSGA023605 | XP_006660868.1 rhodanese-like domain-containing protein 14, chloroplastic isoform X2      |
| TCONS_00017244 | 1.28748 | 1.93212    | 2.44683    | BGIOSGA011365 | XP_015692502.1PREDICTED: uncharacterized protein LOC107304167                             |
| TCONS_00019864 | 1.28942 | 0.846327   | 1.34325    | BGIOSGA022559 | XP_006654833.1PREDICTED: uncharacterized protein LOC102711702                             |
| TCONS_00007616 | 1.29144 | 1.28435    | 1.49265    | BGIOSGA006861 | XP_006648460.1 putative GPI-anchor transamidase                                           |
| TCONS_00017930 | 1.29285 | -0.434107  | 0.651779   | BGIOSGA030356 | XP_006654505.1 CASP-like protein 5B2 isoform X1                                           |
| TCONS_00019268 | 1.29325 | 0.586511   | 0.918267   | BGIOSGA018079 | XP_006654384.1 methyl-CpG-binding domain-containing protein 1-like                        |
| TCONS_00028462 | 1.29349 | 2.3593     | 1.26165    | BGIOSGA001257 | XP_006659692.1 probable calcium-binding protein CML48                                     |
| TCONS_00029044 | 1.29372 | 1.28597    | 1.34912    | BGIOSGA023388 | XP_003578148.1protein ECERIFERUM 3                                                        |
| TCONS_00001823 | 1.29706 | 0.57294    | 1.07109    | BGIOSGA011916 | XP_006644706.1 heat stress transcription factor A-4b                                      |
| TCONS_00029068 | 1.29832 | 1.21115    | 1.62523    | BGIOSGA014467 | NP_001183875.1uncharacterized LOC100275491                                                |
| TCONS_00024610 | 1.30034 | 1.47446    | -0.768036  | BGIOSGA034236 | XP_022679921.1probable carboxylesterase 15 isoform X1                                     |
| TCONS_00018337 | 1.30216 | 1.45251    | 1.929      | BGIOSGA020388 | XP_003567857.1uncharacterized protein LOC100835838                                        |
| TCONS_00020958 | 1.3037  | 0.294522   | 0.724557   | #N/A          | #N/A                                                                                      |
| TCONS_00028064 | 1.30407 | 1.29412    | 1.18305    | #N/A          | #N/A                                                                                      |
| TCONS_00008219 | 1.30452 | 1.7594     | 1.6519     | BGIOSGA015504 | XP_006647334.1 ent-cassadiene C2-hydroxylase-like                                         |
| TCONS_00010007 | 1.30467 | 0.16442    | -0.0737432 | BGIOSGA012557 | XP_021310391.1protein transport protein yos1                                              |
| TCONS_00016712 | 1.30477 | -2.15027   | -0.613269  | BGIOSGA009055 | XP_006652893.1 shikimate kinase 3, chloroplastic                                          |
| TCONS_00004974 | 1.30482 | 0.548676   | 0.61018    | BGIOSGA000243 | XP_006645232.1 small ubiquitin-related modifier 1-like isoform X1                         |
| TCONS_00035344 | 1.30492 | 1.88114    | 1.48279    | BGIOSGA036020 | XP_006663101.1 transmembrane protein 205-like                                             |
| TCONS_00018695 | 1.30581 | 1.19915    | 0.78634    | BGIOSGA002310 | XP_006654091.1 thioredoxin H4-2                                                           |
| TCONS_00011200 | 1.3067  | 1.42227    | 1.51472    | BGIOSGA013801 | XP_006650779.1 splicing factor 3B subunit 6-like protein                                  |
| TCONS_00027288 | 1.30687 | 0.513358   | 1.10949    | BGIOSGA027712 | XP_006659087.1PREDICTED: uncharacterized protein LOC102702399 isoform X2                  |
| TCONS_00028219 | 1.30687 | 0.0731887  | 0.658137   | BGIOSGA029710 | XP_003574677.1alpha/beta hydrolase domain-containing protein 17A                          |
| TCONS_00019789 | 1.30695 | 0.582808   | 2.04363    | BGIOSGA017570 | XP_006654782.1 3-deoxy-manno-oculosonate cytidyltransferase, mitochondrial                |
| TCONS_00037568 | 1.30695 | -0.308844  | -0.660663  | BGIOSGA024204 | XP_002443621.1thaumatin-like protein                                                      |

transcriptome

|                |         |            |           |               |                                                                                     |
|----------------|---------|------------|-----------|---------------|-------------------------------------------------------------------------------------|
| TCONS_00033774 | 1.30915 | 0.889934   | 0.12809   | BGIOSGA030424 | XP_015697712.1 probable plastid-lipid-associated protein 6, chloroplastic           |
| TCONS_00016873 | 1.30949 | 2.494      | 0.127077  | BGIOSGA027376 | XP_004960074.1NDR1/HIN1-like protein 6                                              |
| TCONS_00023660 | 1.30989 | 0.900522   | 0.254065  | BGIOSGA031387 | XP_006657689.1 thioredoxin-like protein CDSP32, chloroplastic                       |
| TCONS_00017502 | 1.31052 | 2.83519    | 1.71922   | BGIOSGA005513 | XP_008644594.1stromal 70 kDa heat shock-related protein, chloroplastic              |
| TCONS_00003995 | 1.31075 | 0.0211822  | 1.36021   | BGIOSGA016144 | XP_006644373.2 probable aldo-keto reductase 1                                       |
| TCONS_00013748 | 1.311   | 0.823983   | 2.13037   | BGIOSGA015511 | XP_006652113.1 putative amidase C869.01                                             |
| TCONS_00003211 | 1.31191 | 0.525712   | 1.43091   | BGIOSGA002005 | XP_006643988.1 protein NLP2-like                                                    |
| TCONS_00022738 | 1.31267 | 1.45463    | 1.50919   | BGIOSGA007624 | XP_006656352.1 glycine cleavage system H protein 2, mitochondrial-like isoform X2   |
| TCONS_00004474 | 1.31285 | 2.37196    | 1.16081   | BGIOSGA029215 | XP_024311908.1exocyst complex component EXO70B1-like                                |
| TCONS_00024095 | 1.31334 | 0.181893   | -0.416435 | BGIOSGA009804 | XP_006658807.1 protein STRICTOSIDINE SYNTHASE-LIKE 4-like                           |
| TCONS_00026990 | 1.31353 | 1.02138    | 1.26611   | BGIOSGA031046 | XP_006659590.1 proteasome subunit beta type-1-like                                  |
| TCONS_00005836 | 1.31372 | 2.59055    | 1.23205   | BGIOSGA007002 | XP_003581127.1premnaspirodine oxygenase                                             |
| TCONS_00036933 | 1.31594 | 0.766264   | 1.09952   | BGIOSGA012378 | XP_006644463.2 putative ribosome biogenesis protein six9-like                       |
| TCONS_00023737 | 1.31595 | -1.13472   | 0.226536  | BGIOSGA025770 | XP_015695140.1 filament-like plant protein 3                                        |
| TCONS_00014054 | 1.31606 | 1.74012    | 1.39366   | BGIOSGA025331 | XP_006647576.1 putative ripening-related protein 2                                  |
| TCONS_00008470 | 1.31813 | 0.278155   | 2.27297   | BGIOSGA031595 | XP_006648879.1 remorin-like isoform X2                                              |
| TCONS_00024861 | 1.32089 | -0.855962  | 1.49484   | BGIOSGA006475 | XP_022685294.1uncharacterized protein LOC111258351                                  |
| TCONS_00000795 | 1.32147 | #NA        | -0.541545 | BGIOSGA009996 | XP_006644125.1 probable receptor-like protein kinase At5g18500                      |
| TCONS_00000230 | 1.32151 | 1.73332    | 1.26447   | BGIOSGA032805 | XP_006645505.1 putative receptor-like protein kinase At3g47110                      |
| TCONS_00021636 | 1.32174 | -0.141429  | 1.76641   | BGIOSGA021884 | XP_003564316.1probable thiol methyltransferase 2                                    |
| TCONS_00004304 | 1.32192 | 1.68797    | 3.35013   | BGIOSGA031779 | XP_006644631.1 E3 ubiquitin-protein ligase MIEL1-like                               |
| TCONS_00001071 | 1.32309 | 1.90933    | 1.63492   | BGIOSGA001360 | XP_015699356.1 monothiol glutaredoxin-S4, mitochondrial                             |
| TCONS_00035764 | 1.32431 | #NA        | -0.520114 | BGIOSGA037175 | XP_015698837.1 2-alkenal reductase (NADP(+)-dependent)-like                         |
| TCONS_00008467 | 1.32636 | -1.92486   | -0.873108 | BGIOSGA033592 | XP_006647586.1 membrane steroid-binding protein 2                                   |
| TCONS_00030256 | 1.32835 | 0.435328   | -0.827243 | BGIOSGA001199 | XP_015696615.1 glucosamine 6-phosphate N-acetyltransferase 1                        |
| TCONS_00003899 | 1.32859 | 1.37571    | 1.62787   | BGIOSGA020261 | XP_015689148.1 30S ribosomal protein S1-like                                        |
| TCONS_00018995 | 1.329   | 0.76809    | 1.03144   | BGIOSGA005656 | XP_006654232.1 pentatricopeptide repeat-containing protein At5g50280, chloroplastic |
| TCONS_00002122 | 1.32989 | 1.728      | 1.5052    | BGIOSGA004750 | XP_006646456.2 zinc finger CCHC domain-containing protein 11                        |
| TCONS_00017217 | 1.33222 | 1.01878    | 2.99834   | BGIOSGA016843 | NP_001149571.1acylglutathione lyase                                                 |
| TCONS_00013125 | 1.33408 | 2.75503    | 1.75928   | BGIOSGA009860 | XP_015690057.1 endoplasmic reticulum oxidoreductin-1                                |
| TCONS_00037378 | 1.33426 | 1.51638    | 1.44591   | BGIOSGA023596 | XP_015698738.1 UNC93-like protein 3 isoform X2                                      |
| TCONS_00008811 | 1.33482 | 1.00705    | 1.38588   | BGIOSGA005618 | XP_002466372.1dolichol-phosphate mannosyltransferase subunit 3                      |
| TCONS_00021854 | 1.33656 | 1.97449    | 1.02328   | BGIOSGA012744 | XP_006656773.1 peptidyl-prolyl cis-trans isomerase CYP40-like                       |
| TCONS_00024707 | 1.33672 | 3.3007     | 1.32925   | BGIOSGA019069 | XP_003557425.1hydroxyproline O-galactosyltransferase GALT5                          |
| TCONS_00028499 | 1.33696 | 0.613664   | 1.92039   | BGIOSGA026458 | XP_006660404.2 exocyst complex component EXO84C-like                                |
| TCONS_00018090 | 1.33704 | 1.68171    | 0.617253  | BGIOSGA002618 | XP_006654613.2 protein SULFUR DEFICIENCY-INDUCED 1-like                             |
| TCONS_00032128 | 1.33843 | -1.74505   | 0.595725  | BGIOSGA003356 | XP_006661732.1 protein STRUBBELIG-RECEPTOR FAMILY 7-like                            |
| TCONS_00026127 | 1.33868 | 0.325377   | 1.04882   | #N/A          | #N/A                                                                                |
| TCONS_00027402 | 1.33978 | -3.11978   | -1.07585  | BGIOSGA022061 | XP_006659159.1 acyl-CoA-binding protein                                             |
| TCONS_00036308 | 1.33984 | 1.82828    | 1.90518   | BGIOSGA031868 | XP_008805368.1 TATA-box-binding protein                                             |
| TCONS_00012990 | 1.33992 | 1.00593    | 0.28122   | BGIOSGA000064 | XP_006651717.1 collagen alpha-2(I) chain-like                                       |
| TCONS_00005528 | 1.34006 | 2.57904    | 1.47188   | BGIOSGA034053 | XP_003570281.1calmodulin-binding protein 25                                         |
| TCONS_00023142 | 1.34093 | -1.90511   | -0.421121 | #N/A          | #N/A                                                                                |
| TCONS_00012859 | 1.34266 | -8.22271   | -0.799348 | BGIOSGA036357 | XP_006650369.2 cytochrome P450 87A3-like                                            |
| TCONS_00010620 | 1.34277 | 2.20126    | 1.83399   | BGIOSGA004844 | XP_006651651.2 N utilization substance protein B homolog                            |
| TCONS_00004825 | 1.34305 | -4.97527   | -0.483406 | BGIOSGA012548 | XP_006646530.1 extradiol ring-cleavage dioxygenase-like                             |
| TCONS_00007310 | 1.34426 | 2.41081    | 2.22372   | BGIOSGA007878 | XP_009381199.1 transcription elongation factor 1 homolog                            |
| TCONS_00031619 | 1.34433 | 1.92942    | 2.1956    | BGIOSGA026016 | XP_006664062.1 polyol transporter 5-like                                            |
| TCONS_00036741 | 1.34453 | 1.41462    | 1.72562   | BGIOSGA034861 | XP_015698804.1PREDICTED: uncharacterized protein LOC102711209                       |
| TCONS_00009478 | 1.34485 | -1.33313   | -0.359649 | BGIOSGA032057 | XP_015690893.1 probable protein phosphatase 2C BIPP2C1                              |
| TCONS_00006460 | 1.34551 | 1.06756    | -0.898267 | BGIOSGA020782 | XP_015689140.1 glutaredoxin-C4, chloroplastic                                       |
| TCONS_00028460 | 1.34587 | 2.05316    | 1.25218   | BGIOSGA019233 | XP_006659685.1 putative low molecular weight protein-tyrosine-phosphatase sir0328   |
| TCONS_00007579 | 1.34619 | -0.444946  | -0.391886 | BGIOSGA004479 | XP_015689906.1 transcription factor PCF7-like                                       |
| TCONS_00011863 | 1.3464  | 1.60335    | 1.60153   | BGIOSGA032373 | XP_006649704.2PREDICTED: uncharacterized protein LOC102720214                       |
| TCONS_00011817 | 1.34755 | 1.05926    | 0.689025  | BGIOSGA021312 | XP_003558451.1mitogen-activated protein kinase kinase 9                             |
| TCONS_00017199 | 1.34772 | -0.0179559 | 0.39558   | BGIOSGA005460 | XP_006655023.1 E3 ubiquitin-protein ligase ATL41                                    |

## transcriptome

|                |         |            |            |               |                                                                                             |
|----------------|---------|------------|------------|---------------|---------------------------------------------------------------------------------------------|
| TCONS_00003170 | 1.34898 | 1.06876    | 0.984437   | BGIOSGA002051 | XP_006643971.1 probable 2-carboxy-D-arabinitol-1-phosphatase                                |
| TCONS_00029904 | 1.35013 | 0.518865   | 0.961173   | BGIOSGA029902 | XP_006660566.1PREDICTED: uncharacterized protein At4g33100                                  |
| TCONS_00008955 | 1.35056 | 1.43265    | 1.43915    | BGIOSGA009053 | XP_006649124.1 zinc finger CCCH domain-containing protein 18                                |
| TCONS_00009071 | 1.35211 | 0.469461   | -0.200884  | #N/A          | #N/A                                                                                        |
| TCONS_00019797 | 1.3534  | 0.403856   | 2.00278    | BGIOSGA017563 | XP_015689720.1 E3 SUMO-protein ligase MMS21-like                                            |
| TCONS_00002944 | 1.35402 | -1.46471   | -1.0663    | BGIOSGA018709 | XP_006643819.1 boron transporter 4-like                                                     |
| TCONS_00007023 | 1.35536 | 2.02431    | 1.69832    | BGIOSGA030760 | XP_002452981.1probable CCR4-associated factor 1 homolog 7                                   |
| TCONS_00014067 | 1.35605 | 0.00818119 | 0.934749   | BGIOSGA034355 | XP_015691738.1 probable magnesium transporter NIPA2 isoform X1                              |
| TCONS_00025611 | 1.35616 | 0.902522   | 1.5355     | BGIOSGA035873 | XP_006658890.1 ATP synthase mitochondrial F1 complex assembly factor 2                      |
| TCONS_00035810 | 1.35656 | 1.29294    | 1.31682    | BGIOSGA011623 | XP_002442071.1tropomyosin-1, isoforms 33/34                                                 |
| TCONS_00019233 | 1.35658 | 2.45046    | 1.5798     | BGIOSGA033171 | XP_004962186.1uncharacterized protein LOC101784684                                          |
| TCONS_00030275 | 1.35667 | 1.23622    | 1.5286     | BGIOSGA031916 | XP_006660780.1 cinnamoyl-CoA reductase 1-like                                               |
| TCONS_00017224 | 1.35694 | 2.67949    | 1.31588    | BGIOSGA023659 | XP_002464354.1F-box protein At3g49450                                                       |
| TCONS_00000476 | 1.3572  | 2.5459     | 1.31523    | BGIOSGA023345 | XP_004967424.1cytochrome P450 71A1                                                          |
| TCONS_00019807 | 1.35754 | -0.705159  | 0.277515   | BGIOSGA017548 | XP_004961194.1cold-regulated 413 inner membrane protein 1, chloroplastic                    |
| TCONS_00013290 | 1.35776 | 0.590998   | 1.53624    | BGIOSGA001453 | XP_003558095.1DNA-binding protein HEXBP                                                     |
| TCONS_00003904 | 1.35814 | 0.290957   | 1.1609     | BGIOSGA034723 | XP_002441721.1uncharacterized protein LOC8071415 isoform X1                                 |
| TCONS_00015922 | 1.35817 | 1.33733    | 1.21283    | BGIOSGA015063 | XP_006652308.1 glutathione S-transferase TCHQD                                              |
| TCONS_00006507 | 1.35838 | 2.67768    | 2.19984    | BGIOSGA020314 | XP_006647564.1 pentatricopeptide repeat-containing protein At4g36680, mitochondrial-like    |
| TCONS_00011875 | 1.35865 | 3.65008    | 1.55264    | BGIOSGA020241 | XP_003558360.1protein EARLY-RESPONSIVE TO DEHYDRATION 7, chloroplastic                      |
| TCONS_00012773 | 1.35901 | 2.20414    | 0.310761   | BGIOSGA001222 | XP_002464205.1pentatricopeptide repeat-containing protein At2g42920, chloroplastic          |
| TCONS_00001560 | 1.35958 | 2.40206    | 1.7126     | BGIOSGA017614 | XP_008675201.1uncharacterized abhydrolase domain-containing protein DDB_G0269086            |
| TCONS_00027284 | 1.36075 | 2.06957    | 2.65658    | BGIOSGA031689 | XP_015695483.1PREDICTED: uncharacterized protein LOC102702775, partial                      |
| TCONS_00019092 | 1.36092 | 0.927152   | 1.12166    | BGIOSGA018265 | XP_006655209.1 ras-related protein Rab-21-like                                              |
| TCONS_00008471 | 1.36106 | 1.32613    | 1.51045    | BGIOSGA027817 | XP_006647595.1 probable ascorbate-specific transmembrane electron transporter 1             |
| TCONS_00029077 | 1.36153 | 0.98623    | -0.566133  | BGIOSGA030823 | XP_015696522.1PREDICTED: uncharacterized protein LOC102719231                               |
| TCONS_00036791 | 1.36246 | 0.899779   | 1.06877    | BGIOSGA036526 | XP_015698848.1 NAD-dependent protein deacylase SRT2                                         |
| TCONS_00001757 | 1.36343 | 0.636773   | 0.729814   | BGIOSGA017684 | XP_002456291.1protein CAJ1                                                                  |
| TCONS_00025960 | 1.36531 | 0.0493576  | 0.967645   | BGIOSGA011423 | NP_001143378.1uncharacterized LOC100276012                                                  |
| TCONS_00037497 | 1.36617 | 2.60986    | 2.01701    | BGIOSGA022578 | XP_006664180.2 thiosulfate/3-mercaptopyruvate sulfurtransferase 2-like                      |
| TCONS_00014876 | 1.36641 | 0.908935   | 2.23634    | BGIOSGA027685 | XP_003580460.1multiple organellar RNA editing factor 2, chloroplastic                       |
| TCONS_00011870 | 1.3666  | 2.36819    | 1.10902    | BGIOSGA036721 | XP_006649710.1PREDICTED: uncharacterized protein LOC102721815                               |
| TCONS_00016830 | 1.36771 | -0.134492  | 1.07143    | BGIOSGA021494 | NP_001148189.2ethylene-responsive transcription factor 3                                    |
| TCONS_00026365 | 1.36803 | 0.276343   | -0.149759  | BGIOSGA030223 | XP_015696177.1 CBS domain-containing protein CBSX1, chloroplastic-like                      |
| TCONS_00023022 | 1.36868 | 0.558909   | 0.79313    | BGIOSGA025051 | XP_015694981.1PREDICTED: uncharacterized protein LOC102719598                               |
| TCONS_00015351 | 1.36874 | #N/A       | 0.00655194 | BGIOSGA024204 | XP_004975059.1thaumatin-like protein 1b                                                     |
| TCONS_00015163 | 1.36967 | 0.95265    | 1.07535    | BGIOSGA017345 | XP_015691795.1 thioredoxin X, chloroplastic                                                 |
| TCONS_00014116 | 1.3712  | 0.164497   | 1.62283    | BGIOSGA016269 | XP_014751692.1MADS-box transcription factor 51                                              |
| TCONS_00029976 | 1.37132 | 3.72586    | 2.56504    | BGIOSGA025973 | XP_010238141.1zinc finger AN1 domain-containing stress-associated protein 17                |
| TCONS_00036773 | 1.37254 | 0.469143   | 1.25551    | BGIOSGA034389 | XP_006664386.2 protein-tyrosine-phosphatase PTP1-like isoform X1                            |
| TCONS_00009896 | 1.37346 | 0.65232    | 1.70475    | BGIOSGA025557 | XP_014755546.1anaphase-promoting complex subunit 11                                         |
| TCONS_00009718 | 1.37421 | 1.07413    | 1.44359    | BGIOSGA012267 | XP_006649782.1 dnaJ homolog subfamily C member 8                                            |
| TCONS_00027014 | 1.37542 | 2.09519    | 1.41045    | BGIOSGA031063 | XP_006660328.2 pyruvate dehydrogenase E1 component subunit beta-1, mitochondrial isoform X1 |
| TCONS_00017583 | 1.37663 | 1.76939    | 2.11566    | BGIOSGA010916 | XP_006654273.1PREDICTED: uncharacterized protein LOC102714375                               |
| TCONS_00029237 | 1.37675 | 1.18067    | 0.363773   | BGIOSGA011227 | XP_006660748.1 caffeoyl-CoA O-methyltransferase-like                                        |
| TCONS_00023512 | 1.37688 | 0.45752    | 0.459354   | BGIOSGA000047 | XP_008651270.1uncharacterized protein LOC100278270 isoform X1                               |
| TCONS_00011928 | 1.37699 | 1.91517    | 2.50205    | BGIOSGA011084 | XP_015690296.1 protein CHAPERONE-LIKE PROTEIN OF POR1, chloroplastic                        |
| TCONS_00017093 | 1.37727 | 0.946631   | -1.12938   | BGIOSGA015989 | XP_004960419.1acyl transferase 4                                                            |
| TCONS_00028002 | 1.37762 | 0.796488   | 0.930022   | BGIOSGA033493 | XP_021320671.1uncharacterized methyltransferase At1g78140, chloroplastic isoform X2         |
| TCONS_00034324 | 1.37966 | 1.91267    | -0.333728  | BGIOSGA033385 | NP_001145027.2uncharacterized protein LOC100278201                                          |
| TCONS_00007105 | 1.37975 | -1.75216   | 0.238915   | BGIOSGA033374 | XP_006648108.2 CLIP-associated protein-like isoform X4                                      |
| TCONS_00032802 | 1.37997 | -0.565837  | -0.161387  | BGIOSGA017396 | XP_002460024.1uncharacterized protein LOC8071893                                            |

## transcriptome

|                |         |            |           |               |                                                                                          |
|----------------|---------|------------|-----------|---------------|------------------------------------------------------------------------------------------|
| TCONS_00001567 | 1.38099 | 0.663993   | 0.246442  | BGIOSGA004200 | XP_003569557.1 uncharacterized protein LOC100836458                                      |
| TCONS_00018848 | 1.38106 | -0.375527  | 2.18064   | BGIOSGA004017 | XP_006645800.1 universal stress protein A-like protein                                   |
| TCONS_00001793 | 1.38218 | 2.33609    | 3.44715   | BGIOSGA008160 | XP_006644680.1 glucan endo-1,3-beta-glucosidase 13 isoform X1                            |
| TCONS_00009791 | 1.38325 | 3.32254    | 1.28215   | BGIOSGA025900 | XP_003547405.1 histone H2A                                                               |
| TCONS_00008259 | 1.38412 | 1.32952    | 0.223859  | BGIOSGA014920 | XP_003572663.1 uncharacterized protein LOC100844997                                      |
| TCONS_00035189 | 1.3855  | 1.27407    | 0.767316  | #N/A          | #N/A                                                                                     |
| TCONS_00011728 | 1.38776 | 0.519143   | 0.581113  | BGIOSGA021330 | XP_010229038.1 probable serine acetyltransferase 4                                       |
| TCONS_00008779 | 1.38896 | 1.60062    | 0.682474  | BGIOSGA016812 | NP_001130472.1 putative galacturonosyltransferase-like 9 precursor                       |
| TCONS_00000146 | 1.39023 | 0.00252222 | 0.112754  | BGIOSGA002719 | XP_006645471.2 delta(7)-sterol-C5(6)-desaturase-like                                     |
| TCONS_00016768 | 1.39134 | 0.783427   | 0.361457  | #N/A          | #N/A                                                                                     |
| TCONS_00013607 | 1.39167 | -0.28805   | 1.15616   | BGIOSGA040505 | XP_006664926.1 glyoxylate/hydroxypyruvate reductase HPR3-like                            |
| TCONS_00024004 | 1.39244 | 2.0014     | 1.20293   | BGIOSGA026028 | XP_002460943.1 U-box domain-containing protein 4                                         |
| TCONS_00013014 | 1.39538 | 0.34808    | 0.516745  | BGIOSGA009974 | XP_006650450.1 PREDICTED: uncharacterized protein LOC102701429                           |
| TCONS_00026913 | 1.39539 | 2.68358    | 1.04362   | BGIOSGA032653 | XP_004973644.1 cytochrome P450 76M5                                                      |
| TCONS_00012111 | 1.39619 | 0.0232105  | 1.02721   | #N/A          | #N/A                                                                                     |
| TCONS_00008942 | 1.39681 | 2.15332    | 2.47984   | BGIOSGA000813 | XP_008643505.1 uncharacterized LOC100280095 isoform X1                                   |
| TCONS_00006453 | 1.39684 | -3.62722   | 0.502402  | BGIOSGA029132 | XP_006647515.1 filament-like plant protein 7                                             |
| TCONS_00035733 | 1.397   | 0.114922   | 0.693075  | BGIOSGA021314 | XP_004960785.2 L10-interacting MYB domain-containing protein isoform X1                  |
| TCONS_00007092 | 1.39799 | 0.982425   | -1.00983  | BGIOSGA021497 | XP_003570371.13-ketoacyl-CoA synthase 12                                                 |
| TCONS_00001330 | 1.3985  | 1.63521    | 1.101     | BGIOSGA003964 | XP_015689235.1 pentatricopeptide repeat-containing protein At5g55740, chloroplastic-like |
| TCONS_00020977 | 1.39863 | 0.124556   | -0.808936 | BGIOSGA023200 | XP_015693626.1 PREDICTED: uncharacterized protein LOC102710506                           |
| TCONS_00034028 | 1.3989  | #NA        | #NA       | BGIOSGA033557 | XP_015697907.1 PREDICTED: uncharacterized protein LOC102719718                           |
| TCONS_00005509 | 1.39943 | 2.19883    | 2.29402   | BGIOSGA039286 | XP_006646936.1 phosphoglycerate kinase, cytosolic                                        |
| TCONS_00004521 | 1.39983 | 1.51817    | 1.53627   | BGIOSGA027553 | XP_015699166.1 diacylglycerol kinase 5-like                                              |
| TCONS_00031697 | 1.39995 | 2.31958    | 1.57537   | BGIOSGA029431 | XP_006662125.2 serine carboxypeptidase-like 13 isoform X1                                |
| TCONS_00036989 | 1.40057 | 1.08619    | 1.57158   | BGIOSGA018492 | XP_003563208.1 uncharacterized protein LOC100828168                                      |
| TCONS_00019673 | 1.40122 | 1.81633    | 0.491988  | BGIOSGA004393 | XP_003568045.1 chaperone protein dnaJ C76, chloroplastic                                 |
| TCONS_00009464 | 1.40146 | 2.08476    | 0.692427  | BGIOSGA005974 | XP_006649526.1 GEM-like protein 1                                                        |
| TCONS_00029884 | 1.40169 | -0.309631  | 0.67266   | BGIOSGA032097 | XP_015696316.1 probable LRR receptor-like serine/threonine-protein kinase At1g05700      |
| TCONS_00016686 | 1.40187 | #NA        | 0.599351  | BGIOSGA028054 | XP_006652878.1 PREDICTED: uncharacterized protein LOC102721356                           |
| TCONS_00018645 | 1.40213 | 2.29051    | -0.047128 | BGIOSGA011921 | XP_002440610.1 REF/SRPP-like protein Osl_017815                                          |
| TCONS_00023368 | 1.40236 | 0.718597   | 0.878764  | BGIOSGA035061 | XP_015694929.1 NAC domain-containing protein 67-like                                     |
| TCONS_00008884 | 1.40311 | 1.33694    | 1.00971   | BGIOSGA037301 | XP_003564116.1 probable tyrosine-protein phosphatase DSP2                                |
| TCONS_00006535 | 1.40315 | 1.22196    | 0.739174  | BGIOSGA008703 | XP_004953270.1 thylakoid lumenal protein TL20.3, chloroplastic                           |
| TCONS_00006907 | 1.40319 | 0.978807   | -0.862181 | BGIOSGA008985 | XP_015688741.1 protein CURVATURE THYLAKOID 1D, chloroplastic-like                        |
| TCONS_00001962 | 1.40421 | 2.18355    | 1.22931   | #N/A          | YP_002000494.1 ATP synthase CF1 beta subunit (chloroplast)                               |
| TCONS_00030035 | 1.40466 | 0.574564   | 0.902498  | BGIOSGA017499 | XP_006660617.1 calmodulin-like protein 2                                                 |
| TCONS_00016292 | 1.40514 | 1.40032    | 1.72299   | BGIOSGA034104 | XP_024311358.1 mitochondrial carrier protein MTM1                                        |
| TCONS_00010912 | 1.40516 | 1.08538    | -0.174948 | BGIOSGA005553 | XP_015690826.1 serine hydroxymethyltransferase, mitochondrial                            |
| TCONS_00014212 | 1.40586 | 1.71198    | 2.22517   | BGIOSGA000542 | XP_006652266.1 insulinoma-associated protein 1-like                                      |
| TCONS_00020163 | 1.40671 | 3.09793    | 2.80801   | BGIOSGA021847 | XP_006656663.1 hsp70-Hsp90 organizing protein 1-like                                     |
| TCONS_00009329 | 1.40769 | 1.51173    | 1.15021   | BGIOSGA011873 | XP_006651049.1 transcription factor-like protein DPB                                     |
| TCONS_00033552 | 1.40824 | 1.22546    | 1.29997   | BGIOSGA035342 | XP_004962904.1 uncharacterized protein LOC101758071 isoform X2                           |
| TCONS_00004337 | 1.40857 | 0.558313   | 0.773628  | BGIOSGA017063 | XP_004969837.1 probable WRKY transcription factor 65                                     |
| TCONS_00033057 | 1.4097  | 1.14654    | 0.994788  | BGIOSGA034890 | XP_004963245.1 receptor kinase-like protein Xa21                                         |
| TCONS_00031995 | 1.41028 | 2.42786    | 1.86341   | BGIOSGA032153 | XP_006661695.1 glycine-rich RNA-binding protein 2-like                                   |
| TCONS_00001171 | 1.41075 | 1.5497     | 1.24697   | BGIOSGA004305 | XP_006644298.1 graves disease carrier protein homolog                                    |
| TCONS_00016991 | 1.41093 | -0.583956  | 0.244014  | BGIOSGA019039 | XP_015692882.1 metallothionein-like protein 2C                                           |
| TCONS_00028112 | 1.41108 | 1.63722    | -0.216651 | BGIOSGA005545 | XP_006659472.1 serine/threonine-protein kinase At5g01020                                 |
| TCONS_00016653 | 1.41148 | 0.406837   | 0.482464  | BGIOSGA014308 | XP_006653788.1 chloroplastic lipocalin                                                   |
| TCONS_00012830 | 1.41156 | -0.0696511 | -1.33332  | BGIOSGA012010 | XP_004955502.1 flavonoid 3'-monooxygenase CYP75B3                                        |
| TCONS_00013277 | 1.41495 | 1.10094    | 0.166075  | BGIOSGA018806 | XP_003558244.1 AP-1 complex subunit sigma-1                                              |
| TCONS_00028060 | 1.41537 | -0.918388  | 0.171941  | BGIOSGA026004 | XP_006659431.1 chlorophyll a-b binding protein P4, chloroplastic                         |
| TCONS_00028771 | 1.41581 | 0.741802   | -1.19864  | BGIOSGA025070 | XP_003577991.1 probable protein phosphatase 2C 68                                        |

## transcriptome

|                |         |            |            |               |                                                                                   |
|----------------|---------|------------|------------|---------------|-----------------------------------------------------------------------------------|
| TCONS_00033469 | 1.41607 | 1.62339    | 1.41374    | BGIOSGA025468 | NP_001148486.1DNA binding protein                                                 |
| TCONS_00024102 | 1.4164  | 2.44662    | 2.94512    | BGIOSGA033615 | XP_015695394.1 oligouridylylate-binding protein 1-like isoform X2                 |
| TCONS_00017001 | 1.41658 | -0.141935  | -1.14256   | BGIOSGA005890 | XP_006653969.1 actin-depolymerizing factor 7                                      |
| TCONS_00020789 | 1.42015 | 1.65896    | 1.04169    | BGIOSGA013379 | XP_006656127.1 reticulon-like protein B2                                          |
| TCONS_00014158 | 1.42039 | 0.661433   | 1.5368     | BGIOSGA004975 | XP_015691718.1 centromere protein S                                               |
| TCONS_00028335 | 1.421   | 1.48547    | 2.19163    | BGIOSGA035636 | XP_006659601.1 signal recognition particle receptor subunit beta-like isoform X2  |
| TCONS_00023600 | 1.42112 | 1.41171    | 0.832142   | BGIOSGA024375 | XP_004984875.160S ribosomal protein L44                                           |
| TCONS_00005523 | 1.42121 | 0.0609562  | 0.218596   | BGIOSGA015161 | XP_004952866.1uncharacterized protein LOC101763013                                |
| TCONS_00001438 | 1.42328 | 2.17473    | 0.223964   | BGIOSGA011413 | XP_006644415.1 scopoletin glucosyltransferase-like                                |
| TCONS_00000778 | 1.4233  | -0.513934  | 0.218223   | BGIOSGA024077 | XP_003567617.1caffeoylshikimate esterase                                          |
| TCONS_00008362 | 1.42336 | 1.65597    | 0.956096   | BGIOSGA018165 | XP_006647499.1 enhancer of rudimentary homolog                                    |
| TCONS_00023501 | 1.42356 | 1.70954    | 1.78938    | BGIOSGA025536 | XP_006658482.1 protein TIC 22-like, chloroplastic                                 |
| TCONS_00031524 | 1.42522 | 1.60871    | 0.219752   | BGIOSGA031599 | XP_006661985.1 probable glutathione S-transferase GSTU6                           |
| TCONS_00024183 | 1.42907 | -0.0456515 | 0.851817   | BGIOSGA020534 | XP_006658016.1 novel plant SNARE 13                                               |
| TCONS_00009726 | 1.42933 | 2.53444    | 1.29432    | BGIOSGA012275 | XP_006649794.1 selenoprotein K                                                    |
| TCONS_00006459 | 1.4295  | 1.79942    | 0.526166   | BGIOSGA008631 | XP_006647522.1 39S ribosomal protein L41-A, mitochondrial-like                    |
| TCONS_00035911 | 1.42997 | 1.8173     | 1.30766    | #N/A          | #N/A                                                                              |
| TCONS_00016168 | 1.43049 | 0.807109   | 1.49692    | BGIOSGA019832 | XP_006652462.1 chitinase 5-like                                                   |
| TCONS_00012242 | 1.43137 | 2.41379    | 1.69616    | BGIOSGA018317 | XP_015689885.1 Fanconi anemia group I protein                                     |
| TCONS_00015814 | 1.4317  | #N/A       | -1.99798   | BGIOSGA022286 | XP_004975477.1protein PYRICULARIA ORYZAE RESISTANCE 21                            |
| TCONS_00019664 | 1.43262 | -3.07306   | -0.0882265 | BGIOSGA007865 | XP_002441416.1anthocyanidin 5,3-O-glucosyltransferase                             |
| TCONS_00022225 | 1.43284 | 1.17964    | 0.906059   | BGIOSGA021272 | XP_004953839.1cysteine-rich repeat secretory protein 60-like                      |
| TCONS_00009211 | 1.43381 | 1.59345    | 0.166684   | BGIOSGA016876 | XP_015690340.1 B3 domain-containing protein Os03g0120900                          |
| TCONS_00003655 | 1.43387 | 1.03713    | -0.0657748 | BGIOSGA001549 | XP_004969790.1uncharacterized protein LOC101776777                                |
| TCONS_00030171 | 1.43656 | 0.98231    | 1.51351    | BGIOSGA001540 | XP_006660705.1 probable protein phosphatase 2C 69                                 |
| TCONS_00003275 | 1.43925 | -2.1065    | -1.70272   | BGIOSGA020575 | XP_004967765.1ADP-ribosylation factor 2                                           |
| TCONS_00004651 | 1.44201 | 1.99856    | -0.594075  | BGIOSGA026724 | XP_015688247.1 sodium-coupled neutral amino acid transporter 5-like isoform X1    |
| TCONS_00015204 | 1.44364 | 1.56777    | 1.69613    | BGIOSGA033153 | XP_006653054.1 ubiquitin-conjugating enzyme E2 variant 1C-like                    |
| TCONS_00029160 | 1.4451  | 2.74339    | 2.76084    | BGIOSGA024937 | NP_001142366.1EF hand family                                                      |
| TCONS_00011876 | 1.44553 | 2.58566    | 0.185793   | #N/A          | #N/A                                                                              |
| TCONS_00016551 | 1.44657 | 0.822144   | 0.546864   | BGIOSGA023325 | NP_001150571.1EF hand family protein                                              |
| TCONS_00032242 | 1.44868 | -3.72818   | 0.675412   | BGIOSGA009727 | XP_020402849.1protein MARD1                                                       |
| TCONS_00021550 | 1.4488  | 1.27167    | 2.76258    | BGIOSGA022001 | NP_001149448.1rad1-like protein                                                   |
| TCONS_00018120 | 1.44997 | 2.5556     | 3.05593    | BGIOSGA000774 | XP_006655478.1 mitochondrial import inner membrane translocase subunit TIM50-like |
| TCONS_00011885 | 1.45164 | #N/A       | 1.45808    | BGIOSGA029269 | XP_006651212.1 pathogenesis-related protein 5-like                                |
| TCONS_00032613 | 1.45171 | 2.17489    | 2.42278    | BGIOSGA016388 | XP_015697173.1 probable serine/threonine-protein kinase At1g01540                 |
| TCONS_00025599 | 1.45558 | 1.37025    | 1.74203    | BGIOSGA023833 | XP_006658031.1 protein N-methyltransferase nnt1                                   |
| TCONS_00018431 | 1.45595 | 3.25504    | 1.8453     | BGIOSGA027057 | XP_006654883.2 UDP-glucose 4-epimerase 1                                          |
| TCONS_00009239 | 1.45694 | 0.357626   | -0.243427  | BGIOSGA030174 | XP_004985853.1benzoate-CoA ligase, peroxisomal                                    |
| TCONS_00027492 | 1.45939 | 1.33778    | 1.28119    | BGIOSGA018486 | XP_006659200.1 lactoylglutathione lyase                                           |
| TCONS_00002163 | 1.46076 | 1.64898    | -0.886076  | BGIOSGA017927 | XP_004970564.1uncharacterized protein LOC101771906                                |
| TCONS_00001137 | 1.46082 | 1.74681    | 1.90972    | BGIOSGA003762 | XP_021313209.1PITH domain-containing protein 1                                    |
| TCONS_00032931 | 1.46154 | 2.2815     | 1.55219    | BGIOSGA036960 | XP_021317106.1uncharacterized protein LOC8085629                                  |
| TCONS_00028424 | 1.46187 | 2.80057    | 2.68392    | BGIOSGA029408 | XP_006659654.1 plant UBX domain-containing protein 8-like isoform X1              |
| TCONS_00033980 | 1.46218 | 0.704799   | 1.26164    | BGIOSGA035666 | XP_015698951.1 calmodulin-binding protein 60 D-like                               |
| TCONS_00004774 | 1.4632  | 2.59182    | 1.14123    | BGIOSGA000440 | XP_006646501.1 protein YLS9-like                                                  |
| TCONS_00037566 | 1.46323 | 0.470786   | -1.51569   | BGIOSGA005890 | XP_006664223.1 actin-depolymerizing factor 11                                     |
| TCONS_00016624 | 1.46326 | 1.48999    | 1.36615    | BGIOSGA018529 | XP_003580557.2trinucleotide repeat-containing gene 18 protein                     |
| TCONS_00028596 | 1.4652  | -0.393979  | 0.437464   | BGIOSGA030342 | XP_006660439.1 E3 ubiquitin-protein ligase RNF181-like                            |
| TCONS_00026684 | 1.46531 | -0.21304   | 0.361031   | BGIOSGA029432 | XP_002439828.1putative clathrin assembly protein At1g03050                        |
| TCONS_00032141 | 1.46647 | 0.52207    | 0.803472   | BGIOSGA024807 | XP_012704263.1protein TIFY 11d                                                    |
| TCONS_00015165 | 1.46722 | 0.0324812  | 1.39581    | BGIOSGA020335 | XP_004960079.1uncharacterized protein LOC101771182                                |
| TCONS_00025332 | 1.46753 | -1.12121   | -0.0284487 | BGIOSGA030566 | XP_006657829.1 chlorophyll a-b binding protein CP29.1, chloroplastic-like         |
| TCONS_00025781 | 1.46957 | -0.449402  | 0.363391   | BGIOSGA027792 | XP_015695470.1 indole-2-monooxygenase-like                                        |
| TCONS_00030724 | 1.47162 | 1.63489    | 0.672313   | BGIOSGA009509 | XP_004967583.1uncharacterized protein LOC101770560                                |
| TCONS_00036480 | 1.47162 | 2.1185     | 1.02984    | BGIOSGA033027 | XP_006664229.1 ras-related protein RABF2b                                         |
| TCONS_00027531 | 1.47338 | 0.804694   | 0.113626   | BGIOSGA027483 | XP_006659205.1 photosystem II 10 kDa polypeptide, chloroplastic                   |
| TCONS_00020324 | 1.474   | -1.36798   | #N/A       | BGIOSGA013573 | XP_015693983.1PREDICTED: uncharacterized protein LOC107304429                     |

transcriptome

|                |         |           |             |               |                                                                                             |
|----------------|---------|-----------|-------------|---------------|---------------------------------------------------------------------------------------------|
| TCONS_00033890 | 1.47474 | 0.2161    | 0.664628    | BGIOSGA021165 | XP_002448565.1 putative disease resistance protein At1g50180                                |
| TCONS_00014527 | 1.47497 | 2.2001    | 2.0697      | BGIOSGA016691 | XP_006652468.1 splicing factor U2AF-associated protein 2                                    |
| TCONS_00000229 | 1.47575 | 1.54202   | 1.93151     | BGIOSGA002805 | XP_006645505.1 putative receptor-like protein kinase At3g47110                              |
| TCONS_00004215 | 1.47593 | 1.54177   | 2.18945     | BGIOSGA031679 | XP_004969619.1 probable glutathione S-transferase GSTU6                                     |
| TCONS_00024361 | 1.47728 | 1.16161   | 1.76935     | BGIOSGA018323 | XP_015694771.1 mediator of RNA polymerase II transcription subunit 33A-like                 |
| TCONS_00001649 | 1.47764 | 0.196334  | 0.107881    | BGIOSGA000974 | XP_006644578.1 farnesyl pyrophosphate synthase                                              |
| TCONS_00028683 | 1.47779 | 1.74243   | 0.62823     | BGIOSGA025977 | XP_021310179.1 uncharacterized protein LOC8063475 isoform X2                                |
| TCONS_00017086 | 1.4783  | 0.983228  | 1.1827      | BGIOSGA001769 | XP_006654018.1 S-adenosylmethionine synthase 1                                              |
| TCONS_00031515 | 1.47855 | 1.79576   | 1.21672     | BGIOSGA018056 | XP_004983851.1 probable glutathione S-transferase GSTU6                                     |
| TCONS_00013120 | 1.4788  | 1.54356   | 1.4692      | BGIOSGA019686 | XP_006650542.1 PREDICTED: uncharacterized protein LOC102704785                              |
| TCONS_00002602 | 1.47965 | 0.721123  | 0.000980655 | BGIOSGA007416 | XP_006645348.1 probable Histone-lysine N-methyltransferase ATXR5                            |
| TCONS_00004864 | 1.48001 | 0.740593  | 1.65157     | BGIOSGA010193 | XP_015695199.1 PREDICTED: uncharacterized protein LOC102702898                              |
| TCONS_00021707 | 1.48025 | 0.868724  | 2.52752     | BGIOSGA024622 | XP_015693741.1 probable galactinol-sucrose galactosyltransferase 6                          |
| TCONS_00009320 | 1.48226 | -0.377336 | 0.0610564   | BGIOSGA011864 | XP_006649402.1 mitochondrial inner membrane protease subunit 2-like                         |
| TCONS_00018180 | 1.48322 | 2.04085   | 1.21272     | BGIOSGA030901 | XP_006654692.1 heat stress transcription factor A-4d-like                                   |
| TCONS_00014478 | 1.485   | 1.63465   | 1.33841     | BGIOSGA003890 | NP_001146954.1 acid phosphatase/vanadium-dependent haloperoxidase related                   |
| TCONS_00029097 | 1.48566 | 0.0824071 | 0.740689    | BGIOSGA030847 | NP_001143544.1 uncharacterized LOC100276234                                                 |
| TCONS_00000588 | 1.4858  | 1.10888   | 1.12331     | BGIOSGA018039 | XP_006644009.1 bifunctional epoxide hydrolase 2-like                                        |
| TCONS_00011056 | 1.48618 | 3.15474   | 3.00432     | BGIOSGA034482 | XP_019082114.1 mitochondrial import inner membrane translocase subunit TIM14-3 isoform X2   |
| TCONS_00009666 | 1.48927 | 2.07803   | 1.9307      | BGIOSGA012210 | XP_015690365.1 cell cycle checkpoint protein RAD17                                          |
| TCONS_00034753 | 1.49263 | 3.6116    | 1.03508     | BGIOSGA017668 | XP_010237735.1 protein PEP-RELATED DEVELOPMENT ARRESTED 1 homolog, chloroplastic isoform X2 |
| TCONS_00004114 | 1.49345 | 0.0223303 | 0.839508    | BGIOSGA020384 | NP_001144147.2 uncharacterized LOC100277000                                                 |
| TCONS_00025662 | 1.49464 | 0.931329  | 0.0299867   | #N/A          | #N/A                                                                                        |
| TCONS_00010965 | 1.49634 | 0.809123  | 0.5111      | #N/A          | #N/A                                                                                        |
| TCONS_00008486 | 1.49738 | -3.99358  | -0.19997    | BGIOSGA014634 | XP_006647605.1 aldehyde dehydrogenase family 3 member F1-like                               |
| TCONS_00014911 | 1.49758 | 0.314838  | -0.389716   | BGIOSGA025263 | XP_004976772.1 protein ECERIFERUM 26-like                                                   |
| TCONS_00011820 | 1.49779 | -0.979138 | -0.978003   | BGIOSGA017720 | XP_006649662.1 non-symbiotic hemoglobin 2                                                   |
| TCONS_00012024 | 1.49918 | 4.27661   | 3.92536     | BGIOSGA027688 | XP_006649860.1 glycine-rich RNA-binding protein 4, mitochondrial                            |
| TCONS_00003052 | 1.50019 | 3.11542   | 1.87802     | BGIOSGA002127 | XP_003565227.1 protein IWS1 homolog A                                                       |
| TCONS_00001291 | 1.50048 | -1.52188  | 0.816546    | BGIOSGA005595 | XP_015697347.1 chlorophyll a-b binding protein 2, chloroplastic                             |
| TCONS_00032849 | 1.50049 | 3.40997   | 3.01515     | BGIOSGA036873 | XP_014757503.1 Holliday junction resolvase MOC1, chloroplastic isoform X2                   |
| TCONS_00007519 | 1.5015  | 1.50828   | 1.71304     | BGIOSGA000733 | XP_004951601.1 uncharacterized protein LOC101757461                                         |
| TCONS_00001939 | 1.50209 | 1.22214   | 1.59605     | BGIOSGA004578 | XP_015692278.1 frataxin, mitochondrial isoform X2                                           |
| TCONS_00030450 | 1.5033  | 2.68661   | 2.32998     | BGIOSGA029352 | XP_006660912.2 la-related protein 1B                                                        |
| TCONS_00031512 | 1.50461 | -3.4025   | -0.995248   | BGIOSGA005170 | XP_002467616.1 probable glutathione S-transferase GSTU6                                     |
| TCONS_00002097 | 1.50474 | 2.08638   | 1.80526     | BGIOSGA004725 | XP_002456567.1 exocyst complex component EXO70B1                                            |
| TCONS_00024415 | 1.50593 | -2.0826   | -0.563184   | BGIOSGA010964 | XP_006659007.2 two-component response regulator-like PRR37 isoform X1                       |
| TCONS_00033952 | 1.50602 | 1.886     | 2.15087     | BGIOSGA000164 | XP_006663643.2 lipase-like                                                                  |
| TCONS_00034145 | 1.50717 | 2.31834   | 2.49291     | BGIOSGA033600 | XP_015697826.1 RNA-directed DNA methylation 4-like isoform X1                               |
| TCONS_00024164 | 1.50858 | 2.18066   | 1.97871     | BGIOSGA010652 | XP_021309721.1 serine/arginine-rich SC35-like splicing factor SCL33 isoform X2              |
| TCONS_00031152 | 1.50894 | 2.11559   | 2.02958     | BGIOSGA015076 | XP_006662368.1 BTB/POZ and MATH domain-containing protein 1-like                            |
| TCONS_00020421 | 1.50922 | 2.34657   | 1.31519     | BGIOSGA019733 | XP_003560867.1 metalloendoproteinase 3-MMP                                                  |
| TCONS_00018014 | 1.50952 | 2.46577   | 1.31445     | BGIOSGA020062 | XP_015692801.1 pentatricopeptide repeat-containing protein At1g11900-like                   |
| TCONS_00001377 | 1.51041 | 1.49706   | 1.63416     | BGIOSGA004007 | XP_006646110.1 chitinase domain-containing protein 1                                        |
| TCONS_00008182 | 1.51102 | 0.619946  | -1.55274    | BGIOSGA014906 | XP_003575145.1 protein MAINTENANCE OF PSII UNDER HIGH LIGHT 1                               |
| TCONS_00005716 | 1.51485 | 2.18294   | 1.61184     | BGIOSGA007833 | XP_006647096.1 protein phosphatase 1 regulatory subunit pprA                                |
| TCONS_00003109 | 1.51515 | 0.790808  | 0.774594    | BGIOSGA005908 | XP_015698093.1 PREDICTED: uncharacterized protein LOC107305334                              |
| TCONS_00004551 | 1.51599 | 0.984559  | 0.255363    | BGIOSGA024189 | NP_001150984.1 GOS2 homolog                                                                 |
| TCONS_00029225 | 1.51821 | 1.89044   | 1.80924     | BGIOSGA030967 | XP_015696676.1 ribosomal RNA small subunit methyltransferase B isoform X1                   |
| TCONS_00032378 | 1.51998 | 1.44378   | 2.37964     | BGIOSGA002504 | XP_006662421.1 PREDICTED: uncharacterized protein LOC102709961                              |
| TCONS_00022992 | 1.52071 | 0.738074  | 1.24183     | BGIOSGA030827 | XP_006655880.1 2Fe-2S ferredoxin-like isoform X1                                            |

transcriptome

|                |         |            |           |               |                                                                                                |
|----------------|---------|------------|-----------|---------------|------------------------------------------------------------------------------------------------|
| TCONS_00030240 | 1.52125 | 1.35496    | 1.76265   | BGIOSGA007782 | XP_006660751.1 ribonuclease Z, chloroplastic                                                   |
| TCONS_00023249 | 1.5213  | 2.4799     | 1.70784   | BGIOSGA028692 | XP_006657517.1 chromatin remodeling protein EBS-like isoform X2                                |
| TCONS_00030912 | 1.52189 | 0.71029    | 1.12365   | BGIOSGA011371 | XP_006661700.1 PREDICTED: uncharacterized protein LOC102718110                                 |
| TCONS_00011671 | 1.52379 | 1.30236    | 1.37702   | BGIOSGA011337 | XP_004985495.1 cation/calcium exchanger 4                                                      |
| TCONS_00003795 | 1.52383 | 2.1795     | 1.19684   | BGIOSGA001416 | XP_015694338.1 PREDICTED: LOW QUALITY PROTEIN: uncharacterized protein LOC102701407            |
| TCONS_00019729 | 1.52388 | 1.03101    | 0.505402  | BGIOSGA032579 | XP_004963626.1 mitogen-activated protein kinase kinase 17                                      |
| TCONS_00026677 | 1.524   | 0.40742    | -0.153872 | BGIOSGA004740 | XP_003574538.1 CBL-interacting protein kinase 6                                                |
| TCONS_00023744 | 1.52401 | 2.60781    | 1.37062   | BGIOSGA025778 | XP_015694648.1 methionine aminopeptidase 1B, chloroplastic                                     |
| TCONS_00035841 | 1.52467 | -0.0976798 | 1.86154   | #N/A          | #N/A                                                                                           |
| TCONS_00032161 | 1.52492 | 2.7267     | 1.78825   | BGIOSGA002207 | XP_006302487.1 solute carrier family 25 member 44                                              |
| TCONS_00010465 | 1.52682 | 0.11387    | -0.495209 | BGIOSGA021192 | XP_010232929.1 ent-cassadiene C2-hydroxylase                                                   |
| TCONS_00018738 | 1.52723 | 1.60841    | 1.76471   | BGIOSGA018679 | NP_001147566.1 bifunctional protein tIS/hpT                                                    |
| TCONS_00024186 | 1.5287  | 2.39373    | 0.412414  | BGIOSGA011658 | XP_002461097.1 uncharacterized protein LOC8063537                                              |
| TCONS_00025373 | 1.52888 | -0.923604  | 1.80747   | BGIOSGA038015 | XP_006657862.1 L-type lectin-domain containing receptor kinase IX.1                            |
| TCONS_00024355 | 1.53249 | 2.76619    | 3.0312    | BGIOSGA025968 | XP_015695358.1 alpha-galactosidase 3-like                                                      |
| TCONS_00000014 | 1.53382 | -0.470678  | -0.506118 | BGIOSGA003461 | XP_006643631.1 PREDICTED: uncharacterized protein LOC102702501                                 |
| TCONS_00015413 | 1.53729 | -0.54628   | 0.0464852 | #N/A          | #N/A                                                                                           |
| TCONS_00029713 | 1.54037 | 1.03139    | 0.0841827 | BGIOSGA033493 | XP_004956437.1 heavy metal-associated isoprenylated plant protein 46                           |
| TCONS_00032319 | 1.54171 | 0.882023   | -0.208706 | #N/A          | #N/A                                                                                           |
| TCONS_00012176 | 1.54281 | 1.00156    | 0.90293   | BGIOSGA010833 | XP_008655209.1 chaperone protein dnaJ 20, chloroplastic                                        |
| TCONS_00017455 | 1.54323 | 1.50632    | 1.51809   | BGIOSGA019530 | XP_006655161.1 DNA mismatch repair protein MSH2                                                |
| TCONS_00009762 | 1.54336 | 2.55693    | 2.86537   | BGIOSGA034614 | XP_006649831.1 protein TOC75, chloroplastic                                                    |
| TCONS_00034424 | 1.54345 | -0.0376706 | 0.902364  | BGIOSGA015174 | XP_021311172.1 putrescine hydroxycinnamoyltransferase 1                                        |
| TCONS_00024027 | 1.54466 | 2.72119    | 0.801071  | BGIOSGA032725 | XP_006657908.1 vesicle transport protein GOT1B-like                                            |
| TCONS_00004308 | 1.54595 | 1.73688    | 0.229026  | BGIOSGA001283 | XP_006644635.1 inorganic pyrophosphatase 2                                                     |
| TCONS_00027002 | 1.54756 | 0.0729623  | -1.45567  | BGIOSGA008983 | XP_012702155.1 MADS-box transcription factor 51                                                |
| TCONS_00010865 | 1.54777 | 2.85305    | 1.89155   | BGIOSGA013486 | XP_004981930.1 maf-like protein DDB_G0281937                                                   |
| TCONS_00010483 | 1.54941 | 2.31862    | 2.47319   | BGIOSGA013087 | XP_006650283.1 fructokinase-like 2, chloroplastic                                              |
| TCONS_00013677 | 1.54952 | 0.222171   | 0.522923  | BGIOSGA009328 | XP_006648155.1 V-type proton ATPase subunit F                                                  |
| TCONS_00008643 | 1.5504  | 1.26897    | 0.65157   | BGIOSGA030840 | XP_015688706.1 trihelix transcription factor GT-3b-like                                        |
| TCONS_00001475 | 1.55093 | -0.646044  | 0.563831  | BGIOSGA004111 | XP_006644440.1 GDSL esterase/lipase At1g28600-like isoform X2                                  |
| TCONS_00022945 | 1.55149 | -0.134196  | -0.184461 | BGIOSGA005828 | XP_006656522.1 protein REVEILLE 1-like                                                         |
| TCONS_00029753 | 1.55181 | 0.536306   | 2.2159    | BGIOSGA011963 | XP_015696560.1 ethylene-responsive transcription factor RAP2-2-like                            |
| TCONS_00014323 | 1.55232 | 1.51296    | 1.53787   | BGIOSGA016487 | XP_006652333.1 PREDICTED: uncharacterized protein LOC102722570                                 |
| TCONS_00005378 | 1.55299 | -0.504316  | -1.81602  | BGIOSGA020573 | XP_004951946.1 uncharacterized protein LOC101760180                                            |
| TCONS_00000489 | 1.5559  | 0.188984   | 0.866103  | BGIOSGA025184 | XP_015697561.1 acyl-coenzyme A thioesterase 13-like                                            |
| TCONS_00009314 | 1.55596 | 0.670901   | 0.295731  | BGIOSGA014024 | XP_006649395.1 ras-related protein RABC2a                                                      |
| TCONS_00003621 | 1.55787 | 1.43815    | 0.0537761 | BGIOSGA001580 | XP_006644194.1 dual specificity protein phosphatase 1B-like isoform X2                         |
| TCONS_00037279 | 1.56005 | 2.97212    | 2.2223    | BGIOSGA029594 | XP_015698315.1 heat shock protein 90-6, mitochondrial                                          |
| TCONS_00027857 | 1.56038 | 2.11173    | 2.31698   | BGIOSGA027148 | XP_010234639.1 grpE protein homolog 2, mitochondrial isoform X1                                |
| TCONS_00024734 | 1.56056 | 0.90124    | 1.80018   | BGIOSGA033161 | XP_004982785.1 thioredoxin-like protein YLS8                                                   |
| TCONS_00020949 | 1.56068 | -5.02229   | -0.160554 | BGIOSGA023171 | XP_006657094.1 PREDICTED: uncharacterized protein LOC102705731                                 |
| TCONS_00033771 | 1.56075 | 2.17337    | 0.791219  | BGIOSGA028020 | XP_015697712.1 probable plastid-lipid-associated protein 6, chloroplastic                      |
| TCONS_00001349 | 1.56119 | 0.224248   | 0.318396  | BGIOSGA003981 | XP_006644363.2 nascent polypeptide-associated complex subunit alpha, muscle-specific form-like |
| TCONS_00023905 | 1.56292 | -0.256581  | -1.50857  | BGIOSGA039436 | XP_006658311.1 short-chain type dehydrogenase/reductase                                        |
| TCONS_00002767 | 1.563   | 0.732719   | 2.26327   | BGIOSGA026063 | XP_002457427.1 zinc finger protein GIS3                                                        |
| TCONS_00027225 | 1.56356 | 1.25034    | -0.540384 | BGIOSGA027779 | XP_006659039.1 probable adenylate kinase 2, chloroplastic                                      |
| TCONS_00002669 | 1.56467 | -3.72882   | -0.518488 | BGIOSGA002047 | XP_006643646.2 isoflavone reductase homolog IRL-like                                           |
| TCONS_00012235 | 1.56478 | -0.0837218 | 2.12212   | BGIOSGA002159 | XP_006650055.1 CBL-interacting protein kinase 10                                               |
| TCONS_00008990 | 1.56517 | 2.35801    | 1.13234   | BGIOSGA035136 | XP_017700379.1 PREDICTED: uncharacterized protein LOC103715899                                 |
| TCONS_00010999 | 1.56518 | 2.72448    | 1.44768   | BGIOSGA001610 | XP_002466416.2 isoflavone 2'-hydroxylase                                                       |
| TCONS_00031649 | 1.56552 | 0.855064   | 1.75949   | BGIOSGA008471 | XP_008658496.1 RING-H2 finger protein ATL5                                                     |
| TCONS_00011559 | 1.567   | 2.3131     | 2.30303   | BGIOSGA021615 | XP_006649396.1 probable aquaporin TIP1-1                                                       |
| TCONS_00014115 | 1.56772 | 0.609881   | 2.31478   | BGIOSGA016106 | XP_008806429.1 MADS-box transcription factor 34-like isoform X3                                |

## transcriptome

|                |         |           |             |               |                                                                                            |
|----------------|---------|-----------|-------------|---------------|--------------------------------------------------------------------------------------------|
| TCONS_00026898 | 1.56774 | 0.304535  | 0.948791    | BGIOSGA006687 | XP_015695656.1 zinc finger A20 and AN1 domain-containing stress-associated protein 11-like |
| TCONS_00023956 | 1.57063 | -0.631813 | 2.53247     | BGIOSGA018731 | NP_001152099.1carboxyl-terminal peptidase precursor                                        |
| TCONS_00000696 | 1.57226 | 0.79397   | 2.09499     | BGIOSGA028986 | XP_004971532.1uncharacterized protein LOC101785548                                         |
| TCONS_00023871 | 1.57251 | 1.33736   | 0.979586    | BGIOSGA025903 | XP_015694673.1 pentatricopeptide repeat-containing protein At4g18975, chloroplastic        |
| TCONS_00024203 | 1.57296 | 1.87833   | 1.06064     | BGIOSGA032046 | XP_015689985.1 vacuolar protein sorting-associated protein 2 homolog 2                     |
| TCONS_00012787 | 1.57506 | 0.0568545 | 2.98188     | BGIOSGA031695 | XP_006650433.1 50S ribosomal protein L18-like                                              |
| TCONS_00010748 | 1.57589 | 0.622097  | 1.28215     | BGIOSGA014352 | NP_001339112.1uncharacterized LOC100193276                                                 |
| TCONS_00006753 | 1.57611 | 1.15814   | 1.02669     | BGIOSGA008922 | XP_006659328.1 bifunctional nuclease 2 isoform X1                                          |
| TCONS_00027887 | 1.57674 | 0.541816  | 1.78922     | BGIOSGA023451 | XP_006662081.1 uncharacterized mitochondrial protein ymf11                                 |
| TCONS_00031653 | 1.57723 | 2.19136   | 2.49507     | BGIOSGA033469 | XP_015693416.1PREDICTED: uncharacterized protein LOC102719302 isoform X1                   |
| TCONS_00021558 | 1.57745 | 2.58699   | 1.57682     | BGIOSGA021990 | XP_015693359.1 NAC domain-containing protein 68-like                                       |
| TCONS_00004619 | 1.57842 | 1.10097   | 1.10474     | BGIOSGA004951 | XP_006650051.2 macro domain-containing protein VPA0103                                     |
| TCONS_00010025 | 1.58005 | 1.36765   | 2.23716     | BGIOSGA015701 | XP_006651339.1 thioredoxin-like 1-2, chloroplastic                                         |
| TCONS_00012186 | 1.58064 | 0.441539  | 0.102676    | BGIOSGA025370 | XP_006654127.1 derlin-1                                                                    |
| TCONS_00018755 | 1.58073 | 1.83898   | 1.40994     | BGIOSGA018666 | XP_003573011.1aspartyl protease family protein 2                                           |
| TCONS_00005923 | 1.58133 | 2.4475    | 1.38133     | BGIOSGA023512 | #N/A                                                                                       |
| TCONS_00010058 | 1.58145 | -1.31075  | -0.216732   | #N/A          | #N/A                                                                                       |
| TCONS_00019427 | 1.58178 | 1.27544   | 0.157808    | BGIOSGA004795 | XP_021312038.1ultraviolet-B receptor UVR8 isoform X3                                       |
| TCONS_00006526 | 1.5819  | 1.05774   | 0.812407    | BGIOSGA008694 | XP_015689380.1PREDICTED: uncharacterized protein LOC102706813                              |
| TCONS_00037276 | 1.58245 | 1.55497   | 1.04497     | BGIOSGA024011 | XP_010237508.1stress-associated endoplasmic reticulum protein 2                            |
| TCONS_00011365 | 1.58276 | 1.04823   | 1.10458     | BGIOSGA013981 | XP_015690155.1PREDICTED: uncharacterized protein LOC107303360                              |
| TCONS_00033456 | 1.58334 | 0.614192  | 0.456191    | BGIOSGA009628 | XP_006662935.1 TPD1 protein homolog 1B-like                                                |
| TCONS_00018349 | 1.58668 | 1.5402    | 1.4222      | BGIOSGA031185 | XP_015692706.1 protein ROOT PRIMORDIUM DEFECTIVE 1                                         |
| TCONS_00018058 | 1.58711 | 1.03754   | 1.65997     | BGIOSGA000642 | XP_006655445.2 probable glycerol-3-phosphate dehydrogenase [NAD(+)] 3, cytosolic           |
| TCONS_00006807 | 1.5872  | 2.58524   | 2.22134     | BGIOSGA008982 | XP_015688938.1 sex-lethal homolog                                                          |
| TCONS_00000643 | 1.58733 | 2.51484   | 2.43895     | BGIOSGA003228 | XP_003566861.1Holliday junction resolvase MOC1, chloroplastic                              |
| TCONS_00033757 | 1.58797 | 1.19411   | 1.61437     | BGIOSGA033690 | XP_006663017.1 barwin-like                                                                 |
| TCONS_00002539 | 1.58897 | 1.58582   | 1.66639     | BGIOSGA024374 | XP_006645383.1 two-component response regulator ORR4-like                                  |
| TCONS_00021092 | 1.58904 | 0.344906  | 1.24908     | BGIOSGA005527 | XP_015697608.1 probable sucrose-phosphate synthase 5                                       |
| TCONS_00002732 | 1.59026 | 1.47139   | 0.279996    | BGIOSGA002490 | XP_006643707.1PREDICTED: uncharacterized protein LOC102701761                              |
| TCONS_00015894 | 1.59141 | -4.21821  | -0.118644   | BGIOSGA030777 | XP_006653401.1 putative cellulose synthase-like protein H3                                 |
| TCONS_00017802 | 1.59254 | 2.84647   | 0.439081    | BGIOSGA024777 | XP_004962100.1probable carboxylesterase 17                                                 |
| TCONS_00028730 | 1.59323 | -5.15182  | -0.215242   | BGIOSGA030483 | XP_006660522.1 protein TPX2                                                                |
| TCONS_00026893 | 1.59338 | 0.844955  | 0.781444    | BGIOSGA001444 | XP_006659564.1 tonoplast dicarboxylate transporter-like                                    |
| TCONS_00012204 | 1.59362 | 1.74219   | 1.15266     | BGIOSGA010803 | XP_006650035.1 hydroxyacylglutathione hydrolase cytoplasmic                                |
| TCONS_00018272 | 1.59489 | 0.696043  | 1.50917     | BGIOSGA002655 | XP_015693335.1 CDP-diacylglycerol-serine O-phosphatidyltransferase 2 isoform X1            |
| TCONS_00001391 | 1.5953  | 2.65008   | 1.72631     | BGIOSGA003628 | XP_006644387.1 protein SGT1 homolog                                                        |
| TCONS_00031012 | 1.59651 | 1.52798   | 2.13028     | BGIOSGA011316 | XP_006662309.2 protein CutA 1, chloroplastic                                               |
| TCONS_00034299 | 1.59727 | -0.180097 | -1.62018    | BGIOSGA000676 | XP_006662731.1 stem-specific protein TSJT1-like                                            |
| TCONS_00012019 | 1.59948 | 2.00277   | 0.985754    | BGIOSGA025900 | XP_003543507.1histone H2A                                                                  |
| TCONS_00033805 | 1.60072 | 1.83664   | -0.109479   | BGIOSGA012751 | XP_006663032.1 40S ribosomal protein S9-2-like                                             |
| TCONS_00010273 | 1.60208 | 2.14102   | 1.06379     | BGIOSGA012836 | XP_015689931.1 probable nucleoredoxin 1-2                                                  |
| TCONS_00022114 | 1.60224 | 0.254757  | 0.867955    | BGIOSGA014851 | XP_003560790.1very-long-chain 3-oxoacyl-CoA reductase 1                                    |
| TCONS_00019432 | 1.6036  | 1.3802    | 1.64996     | BGIOSGA004784 | XP_006654508.1 peptidyl-prolyl cis-trans isomerase FKBP20-1-like                           |
| TCONS_00018862 | 1.60711 | 1.88189   | -0.00387009 | BGIOSGA000109 | XP_006654163.2 probable calcium-binding protein CML18                                      |
| TCONS_00012888 | 1.60735 | -0.408516 | 0.616316    | BGIOSGA025759 | XP_020400186.1putative nuclease HARB11                                                     |
| TCONS_00027716 | 1.6077  | 2.34035   | 2.44167     | BGIOSGA026919 | XP_006659257.1 stromal cell-derived factor 2-like protein                                  |
| TCONS_00016545 | 1.61211 | 4.55778   | 2.78633     | BGIOSGA021182 | XP_006652755.1 ubiquinol oxidase 2, mitochondrial-like                                     |
| TCONS_00021995 | 1.61234 | -0.639843 | -1.02085    | BGIOSGA021520 | XP_003563995.1probable peroxygenase 4                                                      |
| TCONS_00000140 | 1.61361 | 2.16164   | 1.87011     | BGIOSGA002714 | XP_006643687.1PREDICTED: uncharacterized protein LOC102718960 isoform X1                   |
| TCONS_00036214 | 1.61367 | 0.436819  | 2.39806     | BGIOSGA037570 | XP_006664091.1 major allergen Mal d 1-like                                                 |
| TCONS_00036211 | 1.61374 | 2.68063   | 2.44117     | BGIOSGA037570 | XP_006664632.1 major allergen Mal d 1-like                                                 |
| TCONS_00003658 | 1.6153  | 0.207894  | 2.1038      | BGIOSGA006706 | XP_024310953.1LOB domain-containing protein 42-like                                        |
| TCONS_00010293 | 1.61753 | -1.40489  | 0.584996    | BGIOSGA021657 | XP_021311904.1glycine-rich protein DOT1                                                    |
| TCONS_00013267 | 1.61924 | 1.34578   | 1.58334     | BGIOSGA009719 | XP_015690625.1PREDICTED: uncharacterized protein LOC107303879                              |



## transcriptome

|                |         |            |            |               |                                                                                   |
|----------------|---------|------------|------------|---------------|-----------------------------------------------------------------------------------|
| TCONS_00033958 | 1.62426 | 1.23394    | 1.96192    | BGIOSGA007032 | XP_004951733.1probable small nuclear ribonucleoprotein F isoform X1               |
| TCONS_00027475 | 1.62628 | 2.37128    | 1.89028    | BGIOSGA035485 | XP_006659893.2 ubiquitin receptor RAD23d-like                                     |
| TCONS_00024209 | 1.62639 | 3.17523    | 1.62631    | BGIOSGA010683 | XP_006658041.1 nodulation protein H-like                                          |
| TCONS_00035861 | 1.62655 | 3.61092    | 2.37442    | BGIOSGA022066 | XP_006653189.1 ruBisCO large subunit-binding protein subunit alpha, chloroplastic |
| TCONS_00007265 | 1.62886 | 1.06604    | 1.46229    | BGIOSGA036861 | XP_004952072.1calcium-binding protein K1C                                         |
| TCONS_00026947 | 1.62935 | -1.89561   | 0.767197   | BGIOSGA024901 | XP_006659586.1PREDICTED: uncharacterized protein LOC102713014 isoform X1          |
| TCONS_00028817 | 1.63418 | -0.375598  | 0.557853   | BGIOSGA026004 | XP_015696660.1 chlorophyll a-b binding protein of LHClI type 1-like isoform X1    |
| TCONS_00034237 | 1.63492 | 1.70268    | 2.03596    | BGIOSGA036684 | XP_006658385.2PREDICTED: uncharacterized protein LOC102721004                     |
| TCONS_00012092 | 1.63713 | 2.82005    | 2.97127    | BGIOSGA033267 | NP_001148260.1cyclyase/dehydrase family protein                                   |
| TCONS_00031271 | 1.63947 | 3.63024    | 3.69333    | BGIOSGA017649 | XP_006662418.1 chaperonin CPN60-1, mitochondrial                                  |
| TCONS_00017595 | 1.64121 | -0.404452  | 0.996568   | BGIOSGA001394 | XP_006654279.1PREDICTED: uncharacterized protein At5g01610-like                   |
| TCONS_00006701 | 1.64168 | 2.14934    | 1.05234    | BGIOSGA022179 | XP_002454435.1ADP-ribosylation factor                                             |
| TCONS_00005370 | 1.64171 | 0.549466   | -0.259188  | BGIOSGA030208 | XP_006646855.1 protein PTST, chloroplastic-like                                   |
| TCONS_00015547 | 1.64218 | 0.182385   | 0.589563   | BGIOSGA029741 | XP_004975203.1pollen-specific leucine-rich repeat extensin-like protein 3         |
| TCONS_00037572 | 1.64373 | -0.655969  | -0.693083  | BGIOSGA029122 | XP_006664226.1 thaumatin-like protein                                             |
| TCONS_00032057 | 1.64399 | 1.60604    | 1.47983    | BGIOSGA032080 | XP_015697473.1 NAC domain-containing protein 83-like isoform X2                   |
| TCONS_00010783 | 1.64635 | 0.71511    | -0.0117645 | BGIOSGA013410 | XP_015690959.1 probable plastid-lipid-associated protein 4, chloroplastic         |
| TCONS_00029752 | 1.64787 | 1.55768    | 2.36978    | BGIOSGA003197 | XP_015696560.1 ethylene-responsive transcription factor RAP2-2-like               |
| TCONS_00012626 | 1.64863 | 1.36892    | 2.16895    | BGIOSGA024354 | XP_006657672.1 DNA-directed RNA polymerases II, IV and V subunit 6A-like          |
| TCONS_00021942 | 1.64905 | 2.3759     | 1.63945    | BGIOSGA032175 | XP_015693520.1 ankyrin repeat domain-containing protein EMB506, chloroplastic     |
| TCONS_00013401 | 1.65164 | 1.52459    | 1.31062    | BGIOSGA018784 | XP_006650778.1 peptidyl-prolyl cis-trans isomerase CYP22                          |
| TCONS_00034709 | 1.65164 | 1.21045    | 1.96185    | BGIOSGA034121 | XP_006662891.1 thioredoxin-like protein 4B                                        |
| TCONS_00011445 | 1.6537  | 3.44244    | 2.26842    | BGIOSGA005859 | XP_002465989.1mitochondrial import inner membrane translocase subunit TIM23-2     |
| TCONS_00028987 | 1.65455 | 0.735177   | 0.412507   | BGIOSGA030746 | XP_006660618.1PREDICTED: uncharacterized protein LOC102711559                     |
| TCONS_00005040 | 1.65973 | 1.82997    | 1.48896    | BGIOSGA019613 | XP_015690857.1 protein SRC2-like                                                  |
| TCONS_00010752 | 1.65975 | 0.455807   | 1.38468    | BGIOSGA025875 | XP_006651719.1PREDICTED: uncharacterized protein LOC102704789                     |
| TCONS_00021624 | 1.65977 | -4.29677   | -0.480323  | #N/A          | #N/A                                                                              |
| TCONS_00002524 | 1.66293 | 1.04478    | 0.556991   | BGIOSGA025742 | XP_006645391.1 probable glutathione S-transferase                                 |
| TCONS_00035659 | 1.66806 | 0.968123   | -0.437667  | BGIOSGA008064 | XP_006664383.1 dirigent protein 22-like                                           |
| TCONS_00016188 | 1.6693  | 2.44399    | 2.88931    | BGIOSGA014785 | XP_003581392.1ribosomal L1 domain-containing protein 1                            |
| TCONS_00022409 | 1.66957 | #N/A       | 1.32153    | BGIOSGA021053 | XP_015693793.1 protodermal factor 1-like                                          |
| TCONS_00029754 | 1.67019 | 2.08885    | 2.04685    | BGIOSGA030064 | XP_006661201.1PREDICTED: uncharacterized protein LOC102719616, partial            |
| TCONS_00002013 | 1.67151 | 0.412993   | 0.319013   | BGIOSGA009829 | XP_004970291.1UDP-glycosyltransferase 87A2                                        |
| TCONS_00013117 | 1.67193 | 1.17031    | 0.305073   | BGIOSGA009867 | XP_006650541.1 4-hydroxy-3-methylbut-2-enyl diphosphate reductase, chloroplastic  |
| TCONS_00030215 | 1.67228 | 3.00241    | 2.67171    | BGIOSGA036094 | XP_004957103.1heat shock protein 90-5, chloroplastic                              |
| TCONS_00007950 | 1.67287 | 2.22375    | 0.992879   | BGIOSGA016029 | XP_014756602.1eukaryotic peptide chain release factor GTP-binding subunit ERF3A   |
| TCONS_00029257 | 1.67308 | -0.743036  | 0.827318   | BGIOSGA031002 | XP_003576671.1uncharacterized protein LOC100828324                                |
| TCONS_00013634 | 1.67373 | -3.14657   | 1.64609    | BGIOSGA017543 | XP_004975571.13-ketoacyl-CoA synthase 6                                           |
| TCONS_00021489 | 1.67474 | 0.004343   | -0.261832  | BGIOSGA010381 | XP_015693839.1 acyl-CoA-binding protein-like                                      |
| TCONS_00007440 | 1.67507 | 0.398021   | -0.163539  | BGIOSGA007041 | XP_003570999.1B-box zinc finger protein 32                                        |
| TCONS_00005489 | 1.67701 | 1.06904    | 0.971384   | BGIOSGA007603 | XP_006646916.1 ubiquitin thioesterase OTU1                                        |
| TCONS_00002014 | 1.67938 | -2.80559   | 0.87788    | BGIOSGA013958 | NP_001167651.1tubulin beta-6 chain                                                |
| TCONS_00014572 | 1.67967 | 1.54531    | 2.15182    | BGIOSGA016735 | XP_006653587.1 isocitrate dehydrogenase [NADP]-like                               |
| TCONS_00031546 | 1.68127 | 3.56326    | 2.67689    | BGIOSGA008823 | XP_002467583.1tobamovirus multiplication protein 3                                |
| TCONS_00018074 | 1.68313 | 1.8731     | 0.512435   | BGIOSGA020122 | XP_006654604.1 22.3 kDa class VI heat shock protein                               |
| TCONS_00011919 | 1.68459 | 0.514586   | -1.58991   | BGIOSGA006297 | XP_006649755.1PREDICTED: uncharacterized protein LOC102711601                     |
| TCONS_00031658 | 1.68496 | 0.639126   | 1.84603    | BGIOSGA027928 | XP_004983595.1uncharacterized protein LOC101753922                                |
| TCONS_00002522 | 1.68606 | 1.36269    | 1.62907    | BGIOSGA022398 | XP_006645392.1 probable calcium-binding protein CML35                             |
| TCONS_00001066 | 1.68976 | 0.898485   | 2.13395    | BGIOSGA003682 | XP_015698910.1 cinnamoyl-CoA reductase 1-like                                     |
| TCONS_00024648 | 1.69019 | 1.87094    | 1.84318    | BGIOSGA024739 | XP_006658315.1 pentatricopeptide repeat-containing protein At5g03800              |
| TCONS_00018775 | 1.69032 | 2.69255    | 1.93056    | BGIOSGA019112 | XP_004960911.1zinc finger CCCH domain-containing protein 35                       |
| TCONS_00005322 | 1.69185 | 3.95832    | 3.01792    | BGIOSGA006279 | XP_006646819.1 probable alkaline/neutral invertase F                              |
| TCONS_00022802 | 1.69364 | -0.0611539 | 1.75312    | BGIOSGA016050 | XP_006656402.1PREDICTED: uncharacterized protein LOC102718280                     |
| TCONS_00027554 | 1.69415 | 2.50328    | #N/A       | #N/A          | #N/A                                                                              |
| TCONS_00025032 | 1.69482 | 2.5174     | 1.64744    | BGIOSGA008795 | XP_006665130.1 ORM1-like protein 3                                                |
| TCONS_00007635 | 1.69483 | 1.60054    | 2.59582    | BGIOSGA006846 | XP_015688522.1PREDICTED: uncharacterized protein LOC102699564                     |

transcriptome

|                |         |             |             |              |                                                                                                                                   |
|----------------|---------|-------------|-------------|--------------|-----------------------------------------------------------------------------------------------------------------------------------|
| TCONS_00021618 | 1.69606 | 2.35998     | 2.00771     | BGIOGA021899 | XP_004964840.1 uncharacterized protein LOC101784173                                                                               |
| TCONS_00034752 | 1.6962  | 2.07454     | 1.29116     | BGIOGA023232 | XP_004960143.1 protein PEP-RELATED DEVELOPMENT ARRESTED 1 homolog, chloroplastic                                                  |
| TCONS_00003316 | 1.69632 | 2.26118     | 1.84849     | BGIOGA036640 | XP_006644058.1 pyruvate kinase, cytosolic isozyme-like                                                                            |
| TCONS_00018813 | 1.69802 | 0.689146    | 2.1776      | BGIOGA002149 | XP_003568747.1 gibberellin 2-beta-dioxygenase XP_015691164.1 6-phosphofructo-2-kinase/fructose-2,6-bisphosphatase-like isoform X1 |
| TCONS_00009855 | 1.69934 | 2.14506     | -0.222849   | BGIOGA012407 | XP_006657869.1 PREDICTED: uncharacterized protein LOC102711166                                                                    |
| TCONS_00023948 | 1.7017  | #NA         | #NA         | BGIOGA023312 | XP_002285307.2 GTP-binding nuclear protein Ran-3                                                                                  |
| TCONS_00001342 | 1.70183 | 2.55869     | 1.85376     | BGIOGA017514 | XP_004958487.1 uncharacterized protein LOC101767395                                                                               |
| TCONS_00025601 | 1.70222 | 2.00316     | 1.26985     | BGIOGA031246 | XP_008794982.1 probable glycosyltransferase At5g20260                                                                             |
| TCONS_00022782 | 1.70325 | 0.952501    | 1.57479     | BGIOGA006054 | XP_015693364.1 transmembrane protein 56-like                                                                                      |
| TCONS_00018110 | 1.70368 | 1.76659     | 1.41673     | BGIOGA000747 | XP_002452904.2 metal tolerance protein 3 isoform X1                                                                               |
| TCONS_00006951 | 1.70475 | 1.84227     | 2.48888     | BGIOGA012159 | XP_006649841.1 PREDICTED: uncharacterized protein LOC102712341                                                                    |
| TCONS_00009774 | 1.70772 | 1.91036     | 1.38543     | BGIOGA019744 | XP_004970103.1 O-acetyltransferase WSD1                                                                                           |
| TCONS_00004476 | 1.70801 | 2.02146     | 1.57975     | BGIOGA001019 | XP_003561498.1 putative disease resistance protein RGA3                                                                           |
| TCONS_00024474 | 1.71001 | 1.23659     | -0.00465485 | BGIOGA024917 | XP_006654335.1 acyl carrier protein 2, mitochondrial-like                                                                         |
| TCONS_00019192 | 1.71161 | 1.03032     | 1.41296     | BGIOGA009489 | XP_006652669.1 copper chaperone for superoxide dismutase, chloroplastic                                                           |
| TCONS_00014782 | 1.71247 | 1.39003     | 1.67024     | BGIOGA016956 | #N/A                                                                                                                              |
| TCONS_00001967 | 1.71321 | #NA         | 1.13974     | #N/A         | #N/A                                                                                                                              |
| TCONS_00036819 | 1.71468 | #NA         | 0.136151    | #N/A         | #N/A                                                                                                                              |
| TCONS_00015145 | 1.71719 | -0.00366155 | -0.944042   | BGIOGA017325 | NP_001339186.1 OSJNBa0043A12.15-like protein                                                                                      |
| TCONS_00030334 | 1.71735 | -0.400752   | 1.68632     | BGIOGA026586 | XP_006660818.1 transmembrane emp24 domain-containing protein p24beta2-like                                                        |
| TCONS_00001966 | 1.71748 | 1.97985     | 1.12929     | BGIOGA004603 | XP_021312889.1 ctenidin-1                                                                                                         |
| TCONS_00028218 | 1.71944 | 2.92023     | 3.00967     | BGIOGA036094 | XP_004973760.1 heat shock protein 90-5, chloroplastic                                                                             |
| TCONS_00026630 | 1.71974 | 0.66725     | 0.818554    | BGIOGA000662 | XP_006659410.2 PREDICTED: uncharacterized protein LOC102708916, partial                                                           |
| TCONS_00008592 | 1.72139 | 0.65232     | 1.85675     | BGIOGA013487 | XP_006647693.1 mitochondrial import inner membrane translocase subunit Tim13                                                      |
| TCONS_00001663 | 1.72261 | -0.34939    | 1.11681     | BGIOGA017642 | XP_021311441.1 uncharacterized protein LOC8059161                                                                                 |
| TCONS_00009935 | 1.72637 | 1.74129     | 0.582626    | BGIOGA012485 | XP_006649976.1 probable calcium-binding protein CML16                                                                             |
| TCONS_00017356 | 1.72881 | 1.05928     | 2.85511     | BGIOGA029751 | XP_020394787.1 glutathione S-transferase T3 isoform X1                                                                            |
| TCONS_00010891 | 1.72982 | 1.83553     | 1.42399     | BGIOGA027772 | XP_015690054.1 PREDICTED: uncharacterized protein LOC102702183, partial                                                           |
| TCONS_00024724 | 1.72983 | 1.41517     | 1.73841     | BGIOGA002409 | XP_021308341.1 putative F-box protein At1g47765                                                                                   |
| TCONS_00007539 | 1.73011 | -1.87828    | 0.566689    | BGIOGA011279 | XP_006647026.2 dehydrodolichyl diphosphate synthase complex subunit NUS1-like                                                     |
| TCONS_00033130 | 1.73017 | 0.640502    | #NA         | BGIOGA037097 | XP_018682809.1 DNA-directed RNA polymerase subunit 10-like protein isoform X1                                                     |
| TCONS_00000150 | 1.73048 | 0.650259    | 0.18015     | BGIOGA004201 | XP_006643682.1 17.9 kDa heat shock protein 2                                                                                      |
| TCONS_00037170 | 1.73074 | 3.64683     | 2.15508     | BGIOGA006814 | XP_004962656.1 GEM-like protein 5                                                                                                 |
| TCONS_00033934 | 1.73238 | -8.68991    | 0.196633    | BGIOGA037847 | XP_006663630.1 dirigent protein 21-like                                                                                           |
| TCONS_00018599 | 1.73293 | -0.0150827  | -1.04596    | BGIOGA018835 | NP_001142899.2 uncharacterized protein LOC100275324                                                                               |
| TCONS_00021515 | 1.73293 | 1.22196     | 1.67651     | #N/A         | #N/A                                                                                                                              |
| TCONS_00034537 | 1.73307 | 2.48508     | 2.64403     | BGIOGA027685 | XP_015697524.1 multiple organellar RNA editing factor 1, mitochondrial                                                            |
| TCONS_00010036 | 1.73364 | -5.69229    | 0.664879    | BGIOGA012703 | XP_006665078.1 peroxidase 2-like                                                                                                  |
| TCONS_00007663 | 1.73465 | -0.365112   | 1.67231     | BGIOGA011587 | XP_015689154.1 PREDICTED: uncharacterized protein LOC102714894                                                                    |
| TCONS_00011961 | 1.73516 | 1.58673     | 2.01173     | BGIOGA011051 | XP_006649803.1 serine/arginine-rich splicing factor SR45a                                                                         |
| TCONS_00021917 | 1.73558 | 0.699796    | 1.20165     | BGIOGA005535 | XP_006655943.1 pentatricopeptide repeat-containing protein At5g48910-like                                                         |
| TCONS_00007232 | 1.73783 | 2.41968     | 0.878143    | BGIOGA006785 | XP_012698869.1 glycerol-3-phosphate 2-O-acyltransferase 6                                                                         |
| TCONS_00036005 | 1.73902 | 0.426256    | 0.882562    | BGIOGA029709 | XP_006664014.2 AAA-ATPase At3g28580-like                                                                                          |
| TCONS_00027523 | 1.73989 | 1.21364     | 0.0744347   | #N/A         | #N/A                                                                                                                              |
| TCONS_00032893 | 1.74056 | 0.627912    | 1.65774     | BGIOGA020427 | XP_006663173.1 mini zinc finger protein 1-like                                                                                    |
| TCONS_00032970 | 1.74085 | 0.823795    | 0.949773    | BGIOGA034803 | XP_006663212.2 2-carboxy-D-arabinitol-1-phosphatase                                                                               |
| TCONS_00029586 | 1.74121 | 2.43453     | 1.07118     | BGIOGA030233 | XP_010237314.1 protein DCL, chloroplastic isoform X2                                                                              |
| TCONS_00029967 | 1.74125 | 2.13625     | 2.53372     | BGIOGA012604 | XP_003576489.1 protein PLASTID REDOX INSENSITIVE 2, chloroplastic                                                                 |
| TCONS_00033637 | 1.74184 | 1.62647     | 2.65457     | #N/A         | #N/A                                                                                                                              |
| TCONS_00021484 | 1.74336 | 5.22261     | 2.52273     | BGIOGA007332 | XP_006655715.2 ruBisCO large subunit-binding protein subunit beta, chloroplastic                                                  |
| TCONS_00027319 | 1.74402 | -2.84349    | -4.35094    | BGIOGA026136 | XP_003573363.1 (E)-beta-farnesene synthase                                                                                        |
| TCONS_00017194 | 1.74462 | 1.47088     | 1.65892     | BGIOGA009777 | XP_015698984.1 receptor-like protein kinase HERK 1                                                                                |
| TCONS_00002528 | 1.74582 | 2.79202     | 2.38168     | BGIOGA033330 | XP_015693971.1 probable glutathione S-transferase                                                                                 |
| TCONS_00037530 | 1.74582 | 0.622097    | 1.64472     | #N/A         | #N/A                                                                                                                              |
| TCONS_00007856 | 1.74776 | 2.79365     | 1.29735     | BGIOGA008023 | XP_004952322.1 nicotianamine aminotransferase A                                                                                   |

transcriptome

|                |         |           |            |               |                                                                                            |
|----------------|---------|-----------|------------|---------------|--------------------------------------------------------------------------------------------|
| TCONS_00010597 | 1.74912 | -0.561733 | 0.369002   | BGIOSGA017958 | XP_006650344.1 cell division protein FtsZ homolog 2-1, chloroplastic-like                  |
| TCONS_00027255 | 1.74934 | 2.97257   | 2.16052    | BGIOSGA027746 | XP_006659068.1PREDICTED: uncharacterized protein LOC102720818 isoform X2                   |
| TCONS_00034608 | 1.74937 | 1.95399   | 1.1929     | BGIOSGA029294 | XP_002449266.1F-box/kelch-repeat protein                                                   |
| TCONS_00014804 | 1.75153 | -1.38395  | 1.36747    | BGIOSGA016974 | At2g44130                                                                                  |
| TCONS_00006961 | 1.7519  | 3.20063   | 2.04463    | BGIOSGA022600 | XP_003580371.1protein SPIRAL1-like 4                                                       |
| TCONS_00012549 | 1.7526  | 2.42227   | 2.36478    | BGIOSGA010428 | XP_006648708.1 uncharacterized WD repeat-containing protein C3H5.08c-like                  |
| TCONS_00028666 | 1.75289 | 0.742238  | 1.93437    | BGIOSGA028458 | XP_002464344.1F-box/LRR-repeat protein                                                     |
| TCONS_00013399 | 1.7539  | 1.65464   | 2.23712    | BGIOSGA031312 | At3g48880                                                                                  |
| TCONS_00025657 | 1.75467 | 1.81764   | 1.99808    | BGIOSGA033219 | XP_015696465.1 enoyl-[acyl-carrier-protein] reductase [NADH] 2, chloroplastic              |
| TCONS_00006433 | 1.75501 | 1.39292   | 1.96383    | BGIOSGA008597 | XP_006650778.1 peptidyl-prolyl cis-trans isomerase CYP22                                   |
| TCONS_00027148 | 1.75671 | 3.19542   | 2.49186    | BGIOSGA029192 | XP_006658070.1 probable E3 ubiquitin-protein ligase makorin-1                              |
| TCONS_00004301 | 1.75767 | 1.8672    | 1.81021    | BGIOSGA024750 | XP_009385879.1 zinc finger protein 706-like                                                |
| TCONS_00035640 | 1.75876 | 2.7781    | 1.61217    | BGIOSGA026659 | XP_006659701.1PREDICTED: uncharacterized protein LOC102699524                              |
| TCONS_00005212 | 1.75897 | 0.192903  | 1.83404    | BGIOSGA038133 | XP_006644627.1 zinc finger A20 and AN1 domain-containing stress-associated protein 2-like  |
| TCONS_00004623 | 1.7593  | 1.15081   | 1.11419    | BGIOSGA020073 | XP_010238675.1pollen-specific leucine-rich repeat extensin-like protein 2                  |
| TCONS_00011685 | 1.75937 | -0.807548 | -1.97433   | BGIOSGA011324 | NP_001147869.1protein binding protein                                                      |
| TCONS_00012420 | 1.76048 | 2.41358   | 4.7233     | #N/A          | XP_006644903.1 transmembrane protein 56-like                                               |
| TCONS_00023010 | 1.76072 | 1.78953   | 1.14878    | BGIOSGA025039 | XP_015689793.1PREDICTED: uncharacterized protein LOC107303740                              |
| TCONS_00000744 | 1.76082 | 0.0208615 | 0.437034   | BGIOSGA024961 | XP_006657405.1PREDICTED: uncharacterized protein At2g23090-like                            |
| TCONS_00035603 | 1.76099 | 1.60563   | 2.02157    | BGIOSGA002305 | NP_001142673.2uncharacterized LOC100274968                                                 |
| TCONS_00009029 | 1.76202 | 2.6123    | 1.5582     | BGIOSGA002881 | XP_006662742.1PREDICTED: uncharacterized protein LOC102722151                              |
| TCONS_00032700 | 1.76274 | -2.11241  | -2.04974   | BGIOSGA008181 | XP_015692314.1 transcriptional corepressor LEUNIG_HOMOLOG isoform X2                       |
| TCONS_00026695 | 1.76315 | 0.690528  | 1.92297    | BGIOSGA007028 | XP_004983660.1transcription factor GHD7                                                    |
| TCONS_00000772 | 1.76593 | 1.82205   | 3.42411    | BGIOSGA005966 | XP_004973581.1protein GLUTAMINE DUMPER 3                                                   |
| TCONS_00004294 | 1.76633 | -1.72278  | 0.271085   | BGIOSGA019089 | XP_003567604.1ethylene-responsive transcription factor ERF071                              |
| TCONS_00011140 | 1.76633 | 3.00514   | 1.93405    | BGIOSGA025290 | XP_015698521.1 protein IQ-DOMAIN 31-like                                                   |
| TCONS_00000239 | 1.76783 | 0.156699  | -0.0737018 | BGIOSGA002814 | XP_006657517.1 chromatin remodeling protein EBS-like isoform X2                            |
| TCONS_00015041 | 1.76924 | 2.50237   | 1.58573    | BGIOSGA031611 | XP_006643768.1PREDICTED: uncharacterized protein LOC102719806                              |
| TCONS_00010094 | 1.76945 | 2.84314   | 2.5238     | BGIOSGA023780 | XP_015691849.1 microtubule-associated protein RP/EB family member 1A                       |
| TCONS_00013234 | 1.77049 | 1.96314   | 1.805      | BGIOSGA015789 | XP_015689732.1 haloacid dehalogenase-like hydrolase domain-containing protein 3 isoform X3 |
| TCONS_00015053 | 1.77052 | 0.178826  | 1.16749    | BGIOSGA014366 | XP_006650653.1 pentatricopeptide repeat-containing protein At4g14050, mitochondrial        |
| TCONS_00020373 | 1.77109 | 1.17811   | 2.21854    | BGIOSGA019773 | XP_006653819.1 coatomer subunit epsilon-2                                                  |
| TCONS_00024639 | 1.77153 | 1.38108   | 2.15033    | BGIOSGA033070 | XP_006655923.1 annexin D1-like                                                             |
| TCONS_00024948 | 1.77408 | 1.35491   | 1.98874    | BGIOSGA030507 | XP_006658311.1 short-chain type dehydrogenase/reductase                                    |
| TCONS_00021483 | 1.77419 | 3.63889   | 2.92009    | BGIOSGA034997 | XP_006658490.1 pentatricopeptide repeat-containing protein At3g26782, mitochondrial-like   |
| TCONS_00001897 | 1.77444 | 2.39393   | 1.75922    | BGIOSGA021833 | XP_00665715.2 ruBisCO large subunit-binding protein subunit beta, chloroplastic            |
| TCONS_00009851 | 1.78139 | 2.576     | 1.13916    | BGIOSGA012402 | NP_001152669.1mal d 1-associated protein                                                   |
| TCONS_00019711 | 1.78271 | 3.50902   | 3.44501    | BGIOSGA011475 | XP_006649913.1 dnaJ protein ERD3A                                                          |
| TCONS_00010553 | 1.78284 | 1.11665   | 0.948189   | BGIOSGA013165 | XP_006655538.1 chaperonin CPN60-like 2, mitochondrial                                      |
| TCONS_00027259 | 1.78294 | 0.965652  | 0.3478     | BGIOSGA012046 | XP_015690316.1 type IV inositol polyphosphate 5-phosphatase 11 isoform X2                  |
| TCONS_00019161 | 1.78316 | 2.16879   | 1.97206    | BGIOSGA014162 | XP_018677821.1 photosystem II core complex proteins psbY, chloroplastic-like               |
| TCONS_00028022 | 1.78407 | -4.19232  | 0.193632   | BGIOSGA021574 | XP_017608293.1 PHD finger-like domain-containing protein 5B                                |
| TCONS_00025666 | 1.78684 | 1.78151   | 2.28839    | BGIOSGA012617 | XP_015695836.1 probable 2-oxoglutarate-dependent dioxygenase AOP1                          |
| TCONS_00013207 | 1.79052 | -0.14974  | -0.514299  | BGIOSGA012084 | XP_006658075.2 superoxide dismutase [Cu-Zn] 2 isoform X2                                   |
| TCONS_00000448 | 1.79268 | 2.39907   | 2.35854    | BGIOSGA028656 | XP_006651832.1 alpha-1,4 glucan phosphorylase L isozyme, chloroplastic/amyloplastic        |
| TCONS_00031502 | 1.79588 | 1.9489    | 0.415377   | BGIOSGA005165 | XP_010230635.1uncharacterized protein LOC100829892                                         |
| TCONS_00024156 | 1.79663 | 2.15315   | 1.86978    | BGIOSGA009888 | XP_010234937.1probable glutathione S-transferase GSTU6                                     |
| TCONS_00036927 | 1.7983  | 2.1522    | 1.8427     | BGIOSGA036401 | XP_015695020.1 probable calcium-binding protein CML45                                      |
| TCONS_00023723 | 1.79983 | 0.214075  | 0.724375   | BGIOSGA025766 | XP_015698472.1 protein lojap-related, mitochondrial isoform X1                             |
| TCONS_00016594 | 1.80149 | 0.93334   | 2.36036    | BGIOSGA005571 | XP_003563063.1protein C2-DOMAIN ABA-RELATED 8                                              |
| TCONS_00008266 | 1.80841 | 0.413607  | 1.74683    | BGIOSGA014619 | XP_015691571.1 methionine aminopeptidase 1B, chloroplastic-like                            |
|                |         |           |            |               | XP_004952921.1heavy metal-associated isoprenylated plant protein 47                        |

transcriptome

|                |         |            |            |               |                                                                                                 |
|----------------|---------|------------|------------|---------------|-------------------------------------------------------------------------------------------------|
| TCONS_00032620 | 1.81182 | 1.20824    | 0.919607   | BGIOSGA014503 | XP_006662001.1 SUMO-conjugating enzyme SCE1-like                                                |
| TCONS_00021215 | 1.81309 | 0.936438   | 1.53849    | BGIOSGA012527 | XP_006657234.1 14 kDa zinc-binding protein-like                                                 |
| TCONS_00001280 | 1.81784 | -1.87092   | 0.481797   | BGIOSGA001331 | XP_021311274.1 amino acid transporter ANTL1-like                                                |
| TCONS_00010842 | 1.8209  | 1.82499    | 0.66772    | BGIOSGA013462 | XP_006650499.2 UV-B-induced protein At3g17800, chloroplastic-like                               |
| TCONS_00006196 | 1.82369 | -0.663655  | 1.48887    | BGIOSGA008361 | XP_015688621.1 heme-binding-like protein At3g10130, chloroplastic                               |
| TCONS_00007496 | 1.82433 | 2.2718     | 1.88856    | BGIOSGA008973 | XP_002453440.1 mediator of RNA polymerase II transcription subunit 11                           |
| TCONS_00033340 | 1.82532 | 1.03554    | 0.930523   | #N/A          | #N/A                                                                                            |
| TCONS_00019735 | 1.82825 | -0.796889  | -1.85347   | BGIOSGA004256 | XP_006655550.1 phosphoethanolamine N-methyltransferase 1-like                                   |
| TCONS_00009984 | 1.82899 | 0.947042   | 0.726085   | BGIOSGA031223 | XP_0066550016.1 E3 ubiquitin-protein ligase RING1-like                                          |
| TCONS_00014095 | 1.82966 | 2.30845    | 1.94849    | BGIOSGA016250 | XP_004975379.2 small ribosomal subunit biogenesis GTPase RsgA 1, mitochondrial                  |
| TCONS_00012020 | 1.84061 | 2.59653    | 0.797526   | BGIOSGA012342 | XP_006649863.1 arginine biosynthesis bifunctional protein ArgJ, chloroplastic                   |
| TCONS_00001065 | 1.84387 | 2.37468    | 2.56823    | BGIOSGA029530 | XP_015698910.1 cinnamoyl-CoA reductase 1-like                                                   |
| TCONS_00036147 | 1.84509 | 1.90924    | 2.15373    | BGIOSGA037504 | XP_006664600.1 auxin-binding protein 4                                                          |
| TCONS_00031820 | 1.84625 | 2.09837    | 0.288259   | BGIOSGA025623 | XP_006662172.1 cytochrome P450 89A2-like                                                        |
| TCONS_00016170 | 1.84795 | 1.09708    | 3.90588    | BGIOSGA019155 | XP_006652462.1 chitinase 5-like                                                                 |
| TCONS_00008298 | 1.84932 | 2.05229    | 0.995584   | BGIOSGA018464 | XP_024316264.1 uncharacterized protein LOC100825014                                             |
| TCONS_00017002 | 1.85003 | 3.46174    | 1.4        | #N/A          | #N/A                                                                                            |
| TCONS_00029382 | 1.85145 | 0.974838   | 0.727267   | BGIOSGA031578 | XP_021307982.1 cytochrome P450 71A1                                                             |
| TCONS_00002495 | 1.85223 | 3.04858    | 2.27393    | BGIOSGA016866 | XP_015698556.1 S-formylglutathione hydrolase isoform X2                                         |
| TCONS_00029131 | 1.85321 | 3.07796    | 1.66293    | BGIOSGA034348 | XP_015696725.1 protein disulfide isomerase-like 2-3                                             |
| TCONS_00011252 | 1.85321 | 2.07171    | 2.14915    | BGIOSGA037772 | XP_006650823.1 transcription termination/antitermination protein NusG                           |
| TCONS_00011843 | 1.85422 | -0.0747411 | 1.02264    | BGIOSGA016557 | XP_004985129.1 lecithin-cholesterol acyltransferase-like 1                                      |
| TCONS_00000974 | 1.85537 | 1.17305    | 2.64901    | BGIOSGA003576 | XP_015695133.1 PREDICTED: uncharacterized protein LOC102702889                                  |
| TCONS_00020382 | 1.85784 | 0.73864    | 1.39059    | BGIOSGA003433 | XP_021317491.1 GTP-binding protein SAR1A isoform X2                                             |
| TCONS_00034166 | 1.85981 | 2.28467    | 1.4719     | BGIOSGA034628 | XP_006663735.1 phosphogluconate phosphatase LSF2, chloroplastic-like                            |
| TCONS_00025533 | 1.8626  | 0.273236   | 1.13764    | BGIOSGA014992 | XP_021308241.1 E3 ubiquitin-protein ligase EL5                                                  |
| TCONS_00000224 | 1.86276 | 0.0976883  | -0.0164903 | BGIOSGA031463 | XP_015688219.1 short-chain dehydrogenase TIC 32, chloroplastic-like isoform X1                  |
| TCONS_00010924 | 1.86284 | 0.0802911  | 1.26258    | BGIOSGA013532 | XP_006650563.1 DNA repair protein XRCC4                                                         |
| TCONS_00018335 | 1.86361 | 0.16643    | -0.549151  | BGIOSGA036208 | XP_006655602.1 putative cryptochrome DASH, mitochondrial                                        |
| TCONS_00020269 | 1.86407 | 1.91524    | 0.996483   | BGIOSGA005807 | XP_004964598.1 E3 ubiquitin-protein ligase EL5                                                  |
| TCONS_00011094 | 1.86407 | 1.19245    | 1.35688    | BGIOSGA025183 | XP_015690250.1 putative phosphatidylglycerol/phosphatidylinositol transfer protein DDB_G0282179 |
| TCONS_00008365 | 1.86715 | 3.81182    | 2.40387    | BGIOSGA034857 | XP_003575960.1 disease resistance protein RGA2                                                  |
| TCONS_00020533 | 1.86725 | 0.64212    | 1.11558    | BGIOSGA022704 | XP_004965237.1 protein MICROTUBULE BINDING PROTEIN 2C                                           |
| TCONS_00013731 | 1.87244 | 2.61019    | 0.616759   | #N/A          | #N/A                                                                                            |
| TCONS_00017999 | 1.87804 | 1.54765    | 0.479648   | BGIOSGA005971 | XP_015692633.1 U-box domain-containing protein 16-like                                          |
| TCONS_00001223 | 1.88401 | 2.42926    | 1.58748    | BGIOSGA024023 | XP_006646041.1 probable WRKY transcription factor 45                                            |
| TCONS_00001626 | 1.88524 | 2.11838    | 1.58441    | BGIOSGA033804 | XP_003567025.1 transcription repressor MYB5                                                     |
| TCONS_00019976 | 1.88666 | 0.0499255  | 1.50239    | BGIOSGA007582 | XP_004976951.1 uncharacterized protein LOC101772092                                             |
| TCONS_00009365 | 1.88711 | -0.356309  | -0.977854  | BGIOSGA004459 | XP_006649439.2 heat stress transcription factor A-2d                                            |
| TCONS_00005704 | 1.88731 | 0.571666   | 0.91209    | BGIOSGA020826 | XP_006647083.1 pentatricopeptide repeat-containing protein At1g51965, mitochondrial             |
| TCONS_00023883 | 1.88789 | 2.38041    | 1.90195    | BGIOSGA027688 | XP_006657815.1 glycine-rich RNA-binding protein 4, mitochondrial-like                           |
| TCONS_00011065 | 1.88994 | 2.7868     | 2.33351    | BGIOSGA037844 | XP_015690775.1 tubulin beta-7 chain                                                             |
| TCONS_00036217 | 1.89302 | 3.14871    | 1.95315    | BGIOSGA037570 | XP_006664091.1 major allergen Mal d 1-like                                                      |
| TCONS_00037253 | 1.89422 | 1.74796    | 2.13676    | BGIOSGA003110 | XP_006664582.1 upstream activation factor subunit UAF30-like                                    |
| TCONS_00025459 | 1.8943  | 1.36557    | -0.190824  | #N/A          | #N/A                                                                                            |
| TCONS_00014325 | 1.89452 | 1.43942    | 0.378336   | BGIOSGA018756 | XP_006652327.1 PHD finger protein ALFIN-LIKE 4-like                                             |
| TCONS_00014869 | 1.89564 | 2.64007    | 2.5272     | BGIOSGA007862 | XP_015692361.1 altered inheritance rate of mitochondria protein 25                              |
| TCONS_00007334 | 1.89864 | 1.99991    | 1.79794    | BGIOSGA005494 | XP_006646873.1 PREDICTED: uncharacterized protein LOC102707836                                  |
| TCONS_00007719 | 1.9042  | 1.78343    | 1.09105    | BGIOSGA032531 | XP_015694613.1 UPF0481 protein At3g47200-like                                                   |
| TCONS_00029145 | 1.90545 | 0.734628   | -0.147995  | BGIOSGA026244 | XP_015696376.1 transcription factor HEC1-like                                                   |
| TCONS_00037583 | 1.9082  | 2.98026    | 1.61869    | BGIOSGA035777 | XP_006664232.1 ergosterol biosynthetic protein 28                                               |
| TCONS_00008822 | 1.90851 | 1.37085    | 2.36292    | BGIOSGA019773 | XP_015689453.1 annexin D7-like                                                                  |
| TCONS_00004477 | 1.91023 | 1.21303    | 1.80207    | BGIOSGA001019 | XP_004970103.1 O-acyltransferase WSD1                                                           |
| TCONS_00026977 | 1.91102 | 3.08833    | 2.39611    | BGIOSGA029029 | XP_021320391.1 pentatricopeptide repeat-containing protein At5g18390, mitochondrial isoform X1  |
| TCONS_00009219 | 1.91165 | -4.10692   | 0.296461   | BGIOSGA018883 | XP_004985913.1 homeobox protein knotted-1-like 3                                                |

## transcriptome

|                |         |           |             |               |                                                                                     |
|----------------|---------|-----------|-------------|---------------|-------------------------------------------------------------------------------------|
| TCONS_00019578 | 1.91182 | 1.77215   | 0.839501    | BGIOSGA002135 | XP_015692653.1PREDICTED: uncharacterized protein LOC102714017                       |
| TCONS_00027031 | 1.91197 | 1.642     | 2.09881     | BGIOSGA005356 | XP_004973986.1disease resistance protein RPM1                                       |
| TCONS_00031538 | 1.91286 | 1.93791   | 0.00728588  | BGIOSGA011550 | XP_006662000.1PREDICTED: uncharacterized protein LOC102715697                       |
| TCONS_00010698 | 1.9132  | 2.16028   | 1.24546     | BGIOSGA027604 | XP_006650405.1 RING finger protein 5-like                                           |
| TCONS_00021498 | 1.91429 | 3.37114   | 2.62829     | BGIOSGA037058 | XP_006656575.1 chaperone protein DnaJ-like                                          |
| TCONS_00016942 | 1.91815 | 2.64736   | 2.49845     | BGIOSGA018023 | XP_021318098.1NAC transcription factor 32                                           |
| TCONS_00000529 | 1.91841 | 2.47503   | 2.93684     | BGIOSGA019109 | XP_006643975.1 dnaJ homolog subfamily B member 1-like                               |
| TCONS_00036123 | 1.92405 | 1.59193   | 1.86823     | BGIOSGA005427 | XP_015698416.1 F-box/LRR-repeat protein 14                                          |
| TCONS_00014001 | 1.92515 | 2.60252   | 1.30332     | BGIOSGA003395 | XP_006653275.2 probable aldo-keto reductase 3                                       |
| TCONS_00010475 | 1.92566 | 3.92778   | 2.86425     | BGIOSGA013076 | XP_006650287.1 ultraviolet-B receptor UVR8                                          |
| TCONS_00005319 | 1.92765 | 4.16847   | 1.93633     | BGIOSGA007429 | XP_006646818.1 bax inhibitor 1                                                      |
| TCONS_00002937 | 1.92975 | 0.893941  | 0.676737    | BGIOSGA018713 | XP_004968382.1MAPK kinase substrate protein At1g80180                               |
| TCONS_00012043 | 1.9323  | -0.847669 | 0.88636     | BGIOSGA026453 | XP_015690730.1 two-component response regulator-like PRR73                          |
| TCONS_00025560 | 1.93545 | 2.84911   | 2.20767     | BGIOSGA023873 | XP_006657989.1 developmentally-regulated G-protein 3                                |
| TCONS_00026264 | 1.94124 | 1.40021   | 1.69602     | BGIOSGA028349 | XP_006659996.2 pentatricopeptide repeat-containing protein At1g80880, mitochondrial |
| TCONS_00035498 | 1.94172 | 2.2927    | 0.801762    | BGIOSGA027881 | XP_006663769.1 NAC domain-containing protein 77-like                                |
| TCONS_00032951 | 1.94262 | 1.93047   | 1.46729     | BGIOSGA009665 | XP_004977514.1ubiquitin-like protein 5                                              |
| TCONS_00020970 | 1.9431  | 0.17548   | -0.00902286 | BGIOSGA032575 | XP_004965979.1acyl transferase 7                                                    |
| TCONS_00010907 | 1.947   | -0.170118 | 1.14115     | BGIOSGA013520 | XP_003560021.1uncharacterized protein LOC100838044                                  |
| TCONS_00007286 | 1.94709 | 1.27798   | 0.258446    | #N/A          | #N/A                                                                                |
| TCONS_00025109 | 1.94969 | 1.57963   | -0.788263   | BGIOSGA032613 | XP_012699299.17-deoxylognetic acid glucosyltransferase                              |
| TCONS_00012207 | 1.9503  | 2.9163    | 2.76389     | BGIOSGA010800 | XP_006650036.1 ABC transporter I family member 6, chloroplastic                     |
| TCONS_00019802 | 1.95084 | 2.35972   | 1.19984     | BGIOSGA000850 | XP_011005213.1 probable 3-hydroxyisobutyrate dehydrogenase-like 2, mitochondrial    |
| TCONS_00009278 | 1.9515  | 1.35888   | 0.674623    | BGIOSGA018799 | XP_006649374.1PREDICTED: uncharacterized protein LOC102719278                       |
| TCONS_00011679 | 1.95153 | 1.17827   | 3.69692     | BGIOSGA029416 | XP_006651102.1 ethylene-responsive transcription factor RAP2-12-like                |
| TCONS_00010604 | 1.95177 | 2.13688   | 2.8739      | BGIOSGA006290 | XP_015689996.1 elongation factor Tu GTP-binding domain-containing protein 1         |
| TCONS_00025762 | 1.9527  | 2.78298   | 0.944667    | BGIOSGA023663 | XP_004958805.1arogenate dehydratase/prephenate dehydratase 2, chloroplastic         |
| TCONS_00033090 | 1.95341 | 2.66133   | 1.41405     | BGIOSGA017646 | XP_006662787.1 aspartic proteinase Asp1-like                                        |
| TCONS_00026475 | 1.95494 | 2.18433   | 1.74484     | BGIOSGA020950 | XP_006659318.1 multiprotein-bridging factor 1a-like                                 |
| TCONS_00030184 | 1.95592 | 1.74976   | 1.73197     | BGIOSGA029618 | XP_014758191.1protein CURVATURE THYLAKOID 1D, chloroplastic                         |
| TCONS_00005128 | 1.9562  | 3.84537   | 2.02802     | BGIOSGA022733 | XP_006645360.1 abscisic stress-ripening protein 3-like                              |
| TCONS_00022018 | 1.9573  | 1.35867   | 1.3848      | BGIOSGA009273 | XP_006655984.2 3-ketoacyl-CoA synthase 6-like                                       |
| TCONS_00011582 | 1.96446 | 1.19992   | 1.75178     | BGIOSGA008907 | XP_004985669.1heavy metal-associated isoprenylated plant protein 6                  |
| TCONS_00032856 | 1.97153 | -2.96637  | 4.03643     | BGIOSGA019853 | XP_006663742.1 non-specific lipid-transfer protein 3                                |
| TCONS_00027313 | 1.97237 | -0.282763 | -1.43598    | BGIOSGA027689 | XP_003573358.1transcription factor NIGTH1                                           |
| TCONS_00024569 | 1.97768 | 1.77786   | 2.56293     | BGIOSGA009700 | XP_002461452.1ferredoxin--NADP reductase, embryo isozyme, chloroplastic             |
| TCONS_00023112 | 1.97778 | 2.07134   | 3.4281      | BGIOSGA025148 | XP_003557641.1photosystem II 10 kDa polypeptide, chloroplastic                      |
| TCONS_00016990 | 1.9819  | 0.873608  | 0.762182    | BGIOSGA005277 | XP_006653965.1 outer envelope pore protein 16, chloroplastic                        |
| TCONS_00025401 | 1.98354 | 1.60544   | 1.82852     | #N/A          | #N/A                                                                                |
| TCONS_00016123 | 1.98537 | 1.39325   | 1.04163     | BGIOSGA014854 | XP_012702724.1uncharacterized protein LOC101766165 isoform X1                       |
| TCONS_00018076 | 1.98959 | 0.598063  | 2.3278      | BGIOSGA000685 | XP_003566072.1uncharacterized protein LOC100842329                                  |
| TCONS_00033692 | 1.99223 | -0.820316 | 0.584224    | BGIOSGA003944 | XP_006664790.2 AAA-ATPase ASD, mitochondrial-like                                   |
| TCONS_00001224 | 1.99498 | 3.44708   | 2.04631     | BGIOSGA003852 | XP_006646042.1 uncharacterized membrane protein C776.05                             |
| TCONS_00034464 | 1.99595 | 2.53344   | 2.86897     | BGIOSGA034352 | XP_006663274.2 B3 domain-containing protein Os11g0197600-like                       |
| TCONS_00000318 | 1.99634 | 3.6785    | 2.20521     | BGIOSGA019282 | XP_006643833.1 heat shock 70 kDa protein 15-like isoform X2                         |
| TCONS_00002601 | 1.99824 | 1.80202   | 2.27296     | BGIOSGA005240 | XP_015693434.1 uridylate kinase                                                     |
| TCONS_00013338 | 2.00309 | 3.62436   | 2.35991     | BGIOSGA038265 | XP_006650727.1 stem-specific protein TSJT1-like                                     |
| TCONS_00001057 | 2.00554 | 3.96453   | 3.30174     | BGIOSGA017347 | XP_015688152.1PREDICTED: uncharacterized protein LOC102709331                       |
| TCONS_00012036 | 2.0063  | 2.4239    | 1.40627     | BGIOSGA010971 | XP_004984792.1protein IN2-1 homolog B isoform X2                                    |
| TCONS_00001699 | 2.00677 | 2.33082   | 1.68356     | BGIOSGA004334 | XP_015689746.1 violaxanthin de-epoxidase, chloroplastic                             |
| TCONS_00024683 | 2.01002 | 2.87105   | 1.51543     | BGIOSGA024701 | XP_006657515.1 thioredoxin H1                                                       |
| TCONS_00013073 | 2.01361 | 2.08601   | 2.21479     | BGIOSGA002189 | XP_002463979.1uncharacterized protein LOC8059995                                    |
| TCONS_00018503 | 2.01423 | 1.68822   | 1.63925     | BGIOSGA018932 | XP_006653976.1 glutathione S-transferase DHAR2-like                                 |
| TCONS_00011848 | 2.01504 | -3.68037  | 0.459118    | BGIOSGA011559 | XP_006649693.1 peroxidase 15-like                                                   |

## transcriptome

|                |         |           |           |               |                                                                                 |
|----------------|---------|-----------|-----------|---------------|---------------------------------------------------------------------------------|
| TCONS_00016300 | 2.01785 | 1.75003   | 2.41574   | BGIOSGA014669 | XP_002468622.1 general transcription factor 3C polypeptide 6                    |
| TCONS_00016689 | 2.01868 | -1.30678  | 1.78629   | BGIOSGA028054 | XP_006652880.1 PREDICTED: uncharacterized protein LOC102721919                  |
| TCONS_00028699 | 2.0193  | 0.864738  | -0.435197 | BGIOSGA030458 | XP_006664832.1 probable folate-biopterin transporter 8, chloroplast             |
| TCONS_00011152 | 2.01995 | 3.06419   | 0.637035  | #N/A          | #N/A                                                                            |
| TCONS_00020098 | 2.02868 | 3.5535    | 1.8004    | BGIOSGA023195 | XP_006655778.1 palmitoyl-acyl carrier protein thioesterase, chloroplast-like    |
| TCONS_00024000 | 2.0333  | 1.85722   | 1.84621   | BGIOSGA003212 | XP_015695057.1 PREDICTED: uncharacterized protein LOC107304624                  |
| TCONS_00013439 | 2.03519 | 1.78194   | 1.52463   | BGIOSGA019034 | NP_001148959.1 NAD-dependent epimerase/dehydratase                              |
| TCONS_00018550 | 2.03574 | 3.01154   | 3.78152   | BGIOSGA018885 | XP_015693236.1 RNA polymerase II-associated protein 3                           |
| TCONS_00007518 | 2.0392  | 1.12291   | 0.178374  | BGIOSGA006966 | XP_002457530.1 uncharacterized protein LOC8072363                               |
| TCONS_00013609 | 2.04622 | 2.0255    | 1.03243   | BGIOSGA015727 | XP_004974991.1 glyoxylate/hydroxypyruvate reductase HPR3                        |
| TCONS_00023278 | 2.04763 | 2.19386   | 0.0288398 | #N/A          | #N/A                                                                            |
| TCONS_00006564 | 2.04945 | 2.2698    | 3.34616   | #N/A          | #N/A                                                                            |
| TCONS_00015957 | 2.04999 | 1.34319   | 0.75983   | BGIOSGA033307 | NP_001143910.1 uncharacterized protein LOC100276716 precursor                   |
| TCONS_00034510 | 2.05094 | 1.44472   | 1.44466   | BGIOSGA017200 | XP_006662817.1 PREDICTED: uncharacterized protein LOC102719527                  |
| TCONS_00024605 | 2.05213 | -0.98127  | -1.56755  | #N/A          | #N/A                                                                            |
| TCONS_00006002 | 2.05576 | 1.92118   | 0.882717  | BGIOSGA008148 | XP_015688582.1 PREDICTED: uncharacterized protein LOC102720859                  |
| TCONS_00010884 | 2.06032 | 1.00853   | 2.49933   | BGIOSGA013499 | XP_006651775.1 ribosomal RNA small subunit methyltransferase E                  |
| TCONS_00014348 | 2.06201 | 2.17632   | 2.21503   | BGIOSGA005460 | XP_006653470.1 E3 ubiquitin-protein ligase ATL6-like                            |
| TCONS_00030196 | 2.06224 | 2.62082   | 0.866535  | BGIOSGA029125 | XP_006660721.1 E3 ubiquitin-protein ligase ATL31-like                           |
| TCONS_00026476 | 2.06583 | 1.32064   | 1.80485   | BGIOSGA028550 | XP_006659318.1 multiprotein-bridging factor 1a-like                             |
| TCONS_00016759 | 2.06754 | 1.50173   | 1.96278   | BGIOSGA022002 | XP_020407438.1 L10-interacting MYB domain-containing protein-like               |
| TCONS_00013581 | 2.07019 | 3.23549   | 2.46251   | BGIOSGA011475 | XP_006652052.1 ruBisCO large subunit-binding protein subunit alpha              |
| TCONS_00014906 | 2.07519 | 0.790878  | 2.69071   | BGIOSGA026544 | XP_003580517.1 ethylene-responsive transcription factor 4                       |
| TCONS_00018505 | 2.07938 | 3.03609   | 1.70647   | BGIOSGA018930 | XP_006653976.1 glutathione S-transferase DHAR2-like                             |
| TCONS_00014796 | 2.08509 | 2.12259   | 1.78676   | BGIOSGA025736 | XP_006652675.1 polyprenol reductase 1                                           |
| TCONS_00028905 | 2.08693 | 2.04295   | 0.130291  | BGIOSGA030652 | XP_004956705.1 RING-H2 finger protein ATL48                                     |
| TCONS_00036914 | 2.08835 | 2.13147   | 1.12644   | BGIOSGA022301 | XP_006647073.1 PREDICTED: uncharacterized protein LOC102718619                  |
| TCONS_00001772 | 2.08875 | 4.01486   | 1.7726    | BGIOSGA032130 | XP_015692466.1 UDP-glycosyltransferase 88A1-like                                |
| TCONS_00022152 | 2.08982 | 1.85021   | 1.65765   | BGIOSGA022788 | XP_015693781.1 glycine-rich cell wall structural protein-like isoform X3        |
| TCONS_00035227 | 2.09028 | 0.278661  | 0.943011  | BGIOSGA036148 | XP_006663064.1 protein SPIRAL1-like 2                                           |
| TCONS_00026688 | 2.09075 | 2.1933    | 1.20276   | BGIOSGA028757 | XP_021320580.1 myc-associated zinc finger protein                               |
| TCONS_00030048 | 2.09257 | 0.994565  | 0.723617  | BGIOSGA026921 | XP_003578123.1 Golgi SNAP receptor complex member 1-1                           |
| TCONS_00010869 | 2.0932  | 2.40027   | 3.9026    | BGIOSGA006805 | XP_004981923.1 COMPASS-like H3K4 histone methylase component WDR5A              |
| TCONS_00003338 | 2.09374 | 2.46165   | 1.91597   | BGIOSGA005537 | XP_006645779.1 rhomboid-like protein 14, mitochondrial                          |
| TCONS_00021468 | 2.09461 | 0.638116  | 0.986825  | BGIOSGA037492 | XP_004976950.1 uncharacterized protein LOC101771686                             |
| TCONS_00037257 | 2.10502 | 0.980564  | 0.0139688 | BGIOSGA036123 | XP_006664055.1 histone deacetylase 6-like                                       |
| TCONS_00010093 | 2.10662 | 1.13614   | 1.7324    | BGIOSGA005619 | NP_001150724.2 electron transporter                                             |
| TCONS_00017549 | 2.1072  | 3.39996   | 3.19251   | #N/A          | #N/A                                                                            |
| TCONS_00036735 | 2.11001 | 1.65471   | 2.02528   | BGIOSGA004315 | XP_006663842.1 calcineurin B-like protein 6                                     |
| TCONS_00018857 | 2.11084 | 0.935805  | 0.950445  | BGIOSGA018560 | XP_015698943.1 rhomboid-like protein 11, chloroplast                            |
| TCONS_00036876 | 2.11115 | 2.49983   | 2.5044    | #N/A          | #N/A                                                                            |
| TCONS_00031501 | 2.1124  | 2.21956   | 0.818614  | BGIOSGA000988 | XP_002467615.1 probable glutathione S-transferase GSTU6                         |
| TCONS_00012972 | 2.11332 | 0.970146  | 0.609847  | BGIOSGA027430 | XP_002443266.1 DIBOA-glucoside dioxygenase BX6                                  |
| TCONS_00023009 | 2.11578 | 3.49543   | 2.95057   | BGIOSGA025547 | XP_006658221.1 pentatricopeptide repeat-containing protein EL11, chloroplast    |
| TCONS_00008982 | 2.11585 | 1.41154   | 2.18839   | BGIOSGA028055 | NP_001147376.1 serine-rich protein                                              |
| TCONS_00011394 | 2.12027 | 1.26196   | 2.96686   | BGIOSGA002867 | XP_010233715.2 probable acyl-activating enzyme 1, peroxisomal                   |
| TCONS_00008829 | 2.12165 | 3.45232   | 1.88773   | BGIOSGA022702 | XP_002452530.17-deoxyloganetin glucosyltransferase                              |
| TCONS_00031503 | 2.12266 | 1.98232   | 0.920814  | BGIOSGA031599 | XP_002465034.1 probable glutathione S-transferase GSTU6                         |
| TCONS_00023272 | 2.12673 | 1.40364   | -1.44152  | BGIOSGA013752 | XP_006657525.1 cysteine-rich and transmembrane domain-containing protein A-like |
| TCONS_00034227 | 2.12824 | -0.335661 | 2.9471    | BGIOSGA036696 | XP_015697769.1 mitochondrial import inner membrane translocase subunit TIM8     |
| TCONS_00006765 | 2.12898 | 2.25113   | 2.28796   | BGIOSGA002203 | XP_003570258.1 BAG family molecular chaperone regulator 5, mitochondrial        |
| TCONS_00010901 | 2.13385 | 1.56286   | 4.03291   | BGIOSGA013516 | XP_006650546.1 proteinase inhibitor PSI-1.2                                     |
| TCONS_00031088 | 2.13396 | -2.56266  | 0.314689  | BGIOSGA000471 | XP_004983173.1 glycerol-3-phosphate 2-O-acyltransferase 6                       |
| TCONS_00006926 | 2.13516 | 2.97603   | 2.70782   | #N/A          | #N/A                                                                            |
| TCONS_00032527 | 2.13608 | 1.51129   | 0.749238  | BGIOSGA014654 | XP_006661929.1 UPF0329 protein ECU05_1680/ECU11_0050-like isoform X1            |

transcriptome

|                |         |            |           |               |                                                                                                          |
|----------------|---------|------------|-----------|---------------|----------------------------------------------------------------------------------------------------------|
| TCONS_00021325 | 2.13642 | 1.23728    | #NA       | BGIOSGA020584 | XP_006657304.1 probable cation transporter HKT9                                                          |
| TCONS_00017471 | 2.13985 | -2.31706   | 0.25267   | BGIOSGA022922 | XP_006654203.1 polygalacturonase At1g48100                                                               |
| TCONS_00006615 | 2.13999 | 2.10685    | 0.696091  | BGIOSGA016921 | XP_006648922.1PREDICTED: uncharacterized protein LOC102713170                                            |
| TCONS_00023199 | 2.14028 | 1.94099    | 0.742044  | BGIOSGA024735 | XP_006657494.1 non-specific lipid-transfer protein-like protein At2g13820                                |
| TCONS_00025540 | 2.14422 | 2.69918    | 2.68796   | BGIOSGA014795 | XP_021309823.1cytochrome c oxidase subunit 6b-1                                                          |
| TCONS_00027951 | 2.14423 | 0.641773   | 1.6857    | BGIOSGA027043 | NP_001148039.1seed maturation protein PM41                                                               |
| TCONS_00024293 | 2.14606 | -1.99254   | -1.59024  | BGIOSGA038094 | XP_015695027.1 momilactone A synthase-like XP_015695867.1PREDICTED: uncharacterized protein LOC102721388 |
| TCONS_00027886 | 2.14818 | 2.95899    | 3.27898   | BGIOSGA030773 | XP_006661660.1 chloride conductance regulatory protein IClN                                              |
| TCONS_00030786 | 2.14969 | 1.21985    | 2.40928   | BGIOSGA012238 | #N/A                                                                                                     |
| TCONS_00016745 | 2.14969 | -0.365112  | 2.08735   | #N/A          | #N/A                                                                                                     |
| TCONS_00025763 | 2.15115 | 3.62782    | 1.61754   | BGIOSGA012374 | XP_006658179.1 L-ascorbate peroxidase 2, cytosolic                                                       |
| TCONS_00014705 | 2.15282 | -0.0469341 | 0.664628  | BGIOSGA037385 | XP_002446895.1uncharacterized protein LOC8055962                                                         |
| TCONS_00004549 | 2.15624 | 1.36414    | 0.360682  | BGIOSGA000660 | XP_006644835.1PREDICTED: uncharacterized protein LOC102706701                                            |
| TCONS_00032227 | 2.1582  | 3.58661    | 2.43893   | BGIOSGA012825 | XP_022679240.1heat stress transcription factor A-2c isoform X2                                           |
| TCONS_00018993 | 2.16283 | 2.62001    | 2.05488   | #N/A          | #N/A                                                                                                     |
| TCONS_00038971 | 2.16619 | 0.61645    | 1.04649   | #N/A          | NP_043048.1ATP-dependent Clp protease proteolytic subunit (chloroplast)                                  |
| TCONS_00007797 | 2.16657 | 2.52294    | 2.95244   | #N/A          | #N/A                                                                                                     |
| TCONS_00030301 | 2.16786 | 1.39809    | 0.406451  | BGIOSGA002913 | XP_004957251.1probable sarcosine oxidase NP_001145087.1uncharacterized LOC100278297                      |
| TCONS_00017751 | 2.16798 | 1.19951    | 2.84935   | BGIOSGA004270 | XP_015695847.1 OTU domain-containing protein At3g57810-like                                              |
| TCONS_00026905 | 2.17139 | 2.86569    | 2.43263   | BGIOSGA031007 | #N/A                                                                                                     |
| TCONS_00000985 | 2.17224 | 2.77985    | 2.61614   | #N/A          | #N/A                                                                                                     |
| TCONS_00008404 | 2.1738  | 3.0676     | 0.512634  | BGIOSGA031704 | XP_024314664.1poly(U)-specific endoribonuclease homolog                                                  |
| TCONS_00020061 | 2.17398 | 0.75725    | 2.1882    | BGIOSGA008043 | XP_006655756.1PREDICTED: uncharacterized protein LOC102718181                                            |
| TCONS_00009883 | 2.17516 | 0.0216674  | 1.02376   | BGIOSGA012436 | XP_006649943.1 pathogenesis-related protein 1-like                                                       |
| TCONS_00004256 | 2.17604 | 0.438639   | 2.78824   | BGIOSGA006505 | XP_004969679.1F-box/kelch-repeat protein At1g23390                                                       |
| TCONS_00006934 | 2.17619 | 1.34241    | 1.31067   | BGIOSGA009114 | XP_004954050.1auxin-responsive protein SAUR32                                                            |
| TCONS_00010613 | 2.1765  | 2.41242    | 1.02036   | BGIOSGA013236 | XP_006651649.1PREDICTED: uncharacterized protein At3g03773 isoform X2                                    |
| TCONS_00022061 | 2.17806 | 3.06265    | 3.01641   | BGIOSGA008196 | XP_006656881.1 DNA topoisomerase 1                                                                       |
| TCONS_00013150 | 2.17879 | 3.30277    | 2.8219    | #N/A          | #N/A                                                                                                     |
| TCONS_00001321 | 2.18045 | 4.88571    | 7.18031   | BGIOSGA028777 | XP_006644349.1 chaperone protein dnaJ 6-like                                                             |
| TCONS_00025649 | 2.18129 | 2.58718    | 1.18882   | BGIOSGA017222 | NP_001151359.2electron transporter                                                                       |
| TCONS_00015252 | 2.18145 | 1.71453    | 1.88232   | BGIOSGA031551 | XP_004974985.121 kDa protein                                                                             |
| TCONS_00013497 | 2.18168 | 1.8467     | 0.592248  | BGIOSGA008542 | XP_006650868.1PREDICTED: uncharacterized protein LOC102705146 isoform X2                                 |
| TCONS_00013380 | 2.1823  | 1.40533    | 3.09317   | BGIOSGA009605 | XP_015691199.1 elongation factor P isoform X2                                                            |
| TCONS_00025624 | 2.18382 | 2.47648    | 3.11233   | BGIOSGA023808 | XP_015695351.1PREDICTED: uncharacterized protein LOC102711638                                            |
| TCONS_00007876 | 2.18392 | 0.81833    | 2.11714   | BGIOSGA023924 | XP_006647226.1 transcription factor bHLH144-like                                                         |
| TCONS_00001768 | 2.18392 | 3.6834     | 2.17159   | BGIOSGA036756 | XP_006646294.1 probable WRKY transcription factor 56                                                     |
| TCONS_00027195 | 2.18543 | 2.86704    | 1.22028   | BGIOSGA031229 | XP_006659022.1 NAC domain-containing protein 105-like                                                    |
| TCONS_00023872 | 2.18624 | 1.13217    | 1.14921   | BGIOSGA019869 | XP_006657808.2 isopentenyl-diphosphate Delta-isomerase I                                                 |
| TCONS_00014255 | 2.18707 | 1.27003    | 2.71628   | BGIOSGA032833 | XP_003563532.2UPF0496 protein At1g20180                                                                  |
| TCONS_00006827 | 2.18831 | 1.67786    | 1.99074   | BGIOSGA024529 | XP_003573129.1mitochondrial metalloendopeptidase OMA1                                                    |
| TCONS_00016989 | 2.18981 | 2.92071    | 2.3695    | BGIOSGA017013 | XP_015693067.1 replication protein A 70 kDa DNA-binding subunit C-like                                   |
| TCONS_00035563 | 2.19427 | 1.76297    | 1.48649   | BGIOSGA009665 | XP_004977514.1ubiquitin-like protein 5                                                                   |
| TCONS_00004989 | 2.19532 | 2.84872    | 1.62229   | BGIOSGA000229 | XP_010232757.1uncharacterized protein LOC104582933                                                       |
| TCONS_00013325 | 2.1977  | #NA        | 0.0170685 | BGIOSGA024735 | XP_006651900.1 non-specific lipid transfer protein GPI-anchored 2-like isoform X2                        |
| TCONS_00011210 | 2.20002 | 2.89133    | 1.89692   | BGIOSGA029048 | XP_006650786.1 NAC domain-containing protein 67-like                                                     |
| TCONS_00002575 | 2.20622 | 4.64711    | 2.17232   | BGIOSGA035393 | XP_015696293.1 abscisic stress-ripening protein 1-like                                                   |
| TCONS_00013092 | 2.21034 | 2.97238    | 2.37014   | BGIOSGA025102 | XP_006651761.1 probable LRR receptor-like serine/threonine-protein kinase At2g16250                      |
| TCONS_00015966 | 2.21638 | 2.45767    | 0.943717  | BGIOSGA008639 | NP_001150376.1enzyme of the cupin superfamily                                                            |
| TCONS_00026714 | 2.2182  | 2.38953    | 3.76867   | BGIOSGA005481 | XP_015695827.1 dnaJ homolog subfamily C member 7 homolog                                                 |
| TCONS_00030528 | 2.22045 | 2.81582    | 1.48228   | BGIOSGA028270 | XP_015696451.1 NADPH--cytochrome P450 reductase-like                                                     |
| TCONS_00005803 | 2.22419 | 2.38289    | 1.83205   | BGIOSGA026001 | XP_006647135.1 ubiquitin-conjugating enzyme E2 28                                                        |
| TCONS_00014868 | 2.22713 | 3.95758    | 2.46093   | BGIOSGA007862 | XP_004976677.1altered inheritance rate of mitochondria protein 25                                        |
| TCONS_00040265 | 2.22788 | #NA        | 0.74616   | BGIOSGA040007 | XP_003630831.250S ribosomal protein L17                                                                  |
| TCONS_00029747 | 2.23302 | 2.7636     | 4.27518   | BGIOSGA027148 | XP_006661079.1 protein GrpE-like isoform X1                                                              |
| TCONS_00002874 | 2.23509 | 3.66315    | 2.68519   | BGIOSGA026444 | XP_004968281.1pyruvate decarboxylase 1                                                                   |

## transcriptome

|                |         |           |           |               |                                                                                      |
|----------------|---------|-----------|-----------|---------------|--------------------------------------------------------------------------------------|
| TCONS_00032577 | 2.23796 | 2.83545   | 3.05356   | BGIOSGA031537 | XP_006662519.1 zinc finger HIT domain-containing protein 2 isoform X1                |
| TCONS_00008024 | 2.23884 | 3.39347   | 2.3428    | BGIOSGA029030 | XP_006647293.2 peptidyl-prolyl cis-trans isomerase FKBP62-like                       |
| TCONS_00031347 | 2.24606 | 3.16033   | 2.77115   | BGIOSGA025103 | XP_004982785.1 thioredoxin-like protein YLS8                                         |
| TCONS_00036376 | 2.25315 | -0.25615  | 2.40386   | BGIOSGA037742 | XP_006664716.1 light-inducible protein CPRF2-like                                    |
| TCONS_00009234 | 2.2546  | -1.05746  | 2.05295   | BGIOSGA014517 | XP_015689752.1 fasciclin-like arabinogalactan protein 10                             |
| TCONS_00009118 | 2.25863 | 2.68755   | 1.92747   | BGIOSGA028853 | XP_008645756.1 pectinesterase inhibitor 8                                            |
| TCONS_00018600 | 2.25898 | 3.56821   | 0.773382  | BGIOSGA002913 | NP_001278460.1 uncharacterized protein LOC100276833                                  |
| TCONS_00027950 | 2.2594  | 3.57305   | 2.81011   | BGIOSGA027046 | XP_006660098.1 double-stranded RNA-binding protein 4-like                            |
| TCONS_00002496 | 2.26387 | 1.479     | 2.64903   | BGIOSGA005139 | XP_006645309.1 S-formylglutathione hydrolase isoform X1                              |
| TCONS_00029095 | 2.26515 | 3.45351   | 2.53269   | BGIOSGA011878 | XP_015696584.1 protein GAMETE EXPRESSED 1                                            |
| TCONS_00036632 | 2.26901 | 0.715193  | -0.78579  | BGIOSGA034548 | XP_002450220.1 uncharacterized protein LOC8069271                                    |
| TCONS_00013179 | 2.27155 | 3.92156   | 4.24345   | BGIOSGA019956 | XP_006650591.1 tetratricopeptide repeat protein 4 homolog                            |
| TCONS_00023014 | 2.27956 | 0.640041  | 0.895809  | BGIOSGA011559 | XP_006658226.1 peroxidase 51-like                                                    |
| TCONS_00006620 | 2.28255 | 3.20893   | 3.567     | BGIOSGA021767 | XP_006661647.1 F-box protein At2g26160-like                                          |
| TCONS_00013039 | 2.28632 | 3.55615   | 1.81816   | BGIOSGA009948 | XP_006650477.1 microsomal glutathione S-transferase 3                                |
| TCONS_00026544 | 2.28948 | 0.0229783 | 2.44172   | BGIOSGA002789 | XP_015696228.1 very-long-chain (3R)-3-hydroxyacyl-CoA dehydratase PASTICCINO 2A-like |
| TCONS_00007388 | 2.29019 | -0.323004 | 1.15951   | #N/A          | #N/A                                                                                 |
| TCONS_00015363 | 2.29095 | 2.6045    | 0.788493  | BGIOSGA005142 | XP_002446096.1 probable NAD(P)H-dependent oxidoreductase 1                           |
| TCONS_00014066 | 2.29351 | 3.25406   | 0.201451  | BGIOSGA016190 | XP_015692157.1 putative quinone-oxidoreductase homolog, chloroplastic                |
| TCONS_00036277 | 2.30331 | #NA       | 0.0474479 | #N/A          | #N/A                                                                                 |
| TCONS_00025097 | 2.3121  | #NA       | #NA       | BGIOSGA023154 | XP_015694984.1 adenine phosphoribosyltransferase 3-like isoform X2                   |
| TCONS_00011175 | 2.31259 | #NA       | 1.72666   | BGIOSGA025362 | XP_024313019.1 uncharacterized protein LOC112269860                                  |
| TCONS_00008787 | 2.31901 | 2.67412   | 1.52047   | BGIOSGA022838 | XP_006647869.1 metalloendoproteinase 2-MMP-like                                      |
| TCONS_00020278 | 2.32058 | 3.69036   | 2.6844    | BGIOSGA028305 | XP_006655881.1 20 kDa chaperonin, chloroplastic-like                                 |
| TCONS_00016660 | 2.32633 | 1.29707   | 0.324967  | BGIOSGA002010 | XP_003580602.2 splicing factor, proline- and glutamine-rich                          |
| TCONS_00020885 | 2.32729 | 0.449088  | 1.03653   | BGIOSGA012204 | XP_006656167.1 probable inositol oxygenase                                           |
| TCONS_00002277 | 2.3273  | 1.58149   | 1.63658   | BGIOSGA008872 | XP_006645116.1 receptor-like protein kinase HSL1 isoform X1                          |
| TCONS_00023034 | 2.32859 | 2.20944   | 2.65013   | #N/A          | #N/A                                                                                 |
| TCONS_00018309 | 2.33756 | 1.78484   | 2.04285   | BGIOSGA001055 | XP_002440249.2 monothiol glutaredoxin-S9                                             |
| TCONS_00009291 | 2.33825 | 3.12138   | 1.04221   | BGIOSGA001312 | XP_015689757.1 beta-amylase 1, chloroplastic                                         |
| TCONS_00004454 | 2.34107 | 2.40406   | 1.44054   | BGIOSGA001625 | XP_006644754.1 probable glutathione S-transferase GSTF2                              |
| TCONS_00002932 | 2.34199 | 1.24001   | -0.561607 | BGIOSGA002290 | XP_002455103.1 DCC family protein At1g52590, chloroplastic                           |
| TCONS_00021853 | 2.34286 | 1.54775   | 1.2518    | BGIOSGA019102 | XP_006655912.1 blue copper protein-like                                              |
| TCONS_00034691 | 2.34521 | 1.95795   | 1.33593   | BGIOSGA005227 | XP_015688740.1 RING-H2 finger protein ATL29-like                                     |
| TCONS_00006904 | 2.3463  | 4.51145   | 2.85905   | BGIOSGA032130 | XP_006647925.1 7-deoxyloganetin glucosyltransferase-like                             |
| TCONS_00032050 | 2.34658 | 1.92681   | 2.18989   | BGIOSGA032088 | XP_008666748.1 os10g0351100-like protein isoform X1                                  |
| TCONS_00008565 | 2.35019 | 1.1855    | 1.59582   | BGIOSGA031543 | XP_003572807.2 mitochondrial import inner membrane translocase subunit TIM23-3       |
| TCONS_00020650 | 2.35355 | 2.53567   | 3.11448   | BGIOSGA011650 | XP_006656054.1 probable aquaporin TIP2-2                                             |
| TCONS_00014609 | 2.35366 | 2.40646   | 2.04641   | BGIOSGA002552 | XP_006656086.1 isoflavone reductase-like protein                                     |
| TCONS_00022026 | 2.35557 | 1.59375   | 2.45677   | BGIOSGA021490 | XP_003563977.1 carbon catabolite repressor protein 4 homolog 3                       |
| TCONS_00036913 | 2.36536 | 3.85733   | 1.74619   | BGIOSGA005303 | XP_004964557.1 uncharacterized protein LOC101772275                                  |
| TCONS_00019657 | 2.36639 | 2.23761   | 1.66232   | BGIOSGA026166 | XP_006654680.1 anthocyanidin 5,3-O-glucosyltransferase-like                          |
| TCONS_00028136 | 2.36668 | 4.70192   | 2.34448   | BGIOSGA034153 | XP_006659483.1 activator of 90 kDa heat shock protein ATPase homolog 1               |
| TCONS_00010724 | 2.36763 | 1.25113   | 0.104798  | BGIOSGA028078 | XP_006650418.1 gamma-glutamyl peptidase 5-like                                       |
| TCONS_00016239 | 2.37607 | 3.18153   | 2.71911   | BGIOSGA014736 | XP_006652504.1 peroxygenase                                                          |
| TCONS_00030278 | 2.37698 | 1.2147    | 1.1032    | BGIOSGA013825 | XP_006660781.1 cinnamoyl-CoA reductase 2-like                                        |
| TCONS_00032073 | 2.37795 | 1.84104   | 1.13998   | BGIOSGA028614 | XP_003574458.1 AP-4 complex subunit sigma                                            |
| TCONS_00015096 | 2.38929 | 0.695926  | 0.602463  | BGIOSGA013493 | XP_002447253.1 uncharacterized protein LOC8070255                                    |
| TCONS_00017299 | 2.38936 | 0.124756  | 0.240435  | BGIOSGA002954 | XP_021894753.1 metallothionein-like protein type 3                                   |
| TCONS_00030381 | 2.39127 | -0.231489 | 2.32885   | BGIOSGA005257 | XP_002462689.2 dehydration-responsive element-binding protein 1B                     |
| TCONS_00025896 | 2.39546 | 0.41264   | 0.932427  | BGIOSGA026659 | XP_024317101.1 aromatic-L-amino-acid decarboxylase-like                              |
| TCONS_00001886 | 2.40051 | 3.47898   | 1.94912   | BGIOSGA004520 | XP_006644768.1 PREDICTED: uncharacterized protein LOC102711202                       |
| TCONS_00003711 | 2.40164 | 2.92371   | 0.750373  | BGIOSGA001494 | XP_015688913.1 PREDICTED: uncharacterized protein LOC102713785                       |
| TCONS_00010738 | 2.40302 | 0.784924  | 2.21547   | BGIOSGA013362 | XP_006650425.1 costars family protein                                                |
| TCONS_00028120 | 2.40384 | 1.71453   | 4.7083    | BGIOSGA026870 | XP_006659477.1 germin-like protein 8-14                                              |



## transcriptome

|                |         |           |           |               |                                                                                                                                                |
|----------------|---------|-----------|-----------|---------------|------------------------------------------------------------------------------------------------------------------------------------------------|
| TCONS_00033229 | 2.40591 | 1.23609   | 1.65957   | BGIOSGA035063 | XP_006662848.1 keratin, type II cytoskeletal 5<br>XP_006643701.2 mannose-6-phosphate isomerase 1                                               |
| TCONS_00000126 | 2.40696 | 3.01015   | 3.00003   | BGIOSGA029821 |                                                                                                                                                |
| TCONS_00004516 | 2.40714 | 3.44853   | 3.06344   | #N/A          | #N/A                                                                                                                                           |
| TCONS_00016366 | 2.4097  | 3.17662   | 2.1087    | BGIOSGA005911 | XP_015691974.1PREDICTED: uncharacterized protein LOC102701168                                                                                  |
| TCONS_00018056 | 2.41697 | 2.43305   | 3.63175   | BGIOSGA020104 | XP_006655444.1 zinc finger protein 830<br>XP_006652623.1 14 kDa proline-rich protein DC2.15-like                                               |
| TCONS_00014726 | 2.41778 | #NA       | 2.42955   | BGIOSGA001825 | XP_015697891.1PREDICTED: uncharacterized protein LOC107305273                                                                                  |
| TCONS_00033412 | 2.41863 | #NA       | 2.27442   | BGIOSGA031079 |                                                                                                                                                |
| TCONS_00024609 | 2.42224 | 0.78696   | -0.808894 | BGIOSGA005562 | XP_010228727.1myosin-binding protein 7                                                                                                         |
| TCONS_00028970 | 2.4374  | 1.33824   | 1.46579   | #N/A          | #N/A                                                                                                                                           |
| TCONS_00032356 | 2.44357 | 1.52619   | 2.08055   | BGIOSGA031775 | XP_006661830.1 inosine triphosphate pyrophosphatase<br>XP_006652944.1 farnesyl pyrophosphate synthase-like                                     |
| TCONS_00016777 | 2.44436 | 2.17997   | 0.0597559 | BGIOSGA014190 |                                                                                                                                                |
| TCONS_00001401 | 2.44438 | 3.41654   | 2.80272   | BGIOSGA006911 | XP_006644394.2 cytochrome P450 72A15-like<br>XP_006650491.1PREDICTED: uncharacterized protein LOC102712975                                     |
| TCONS_00010811 | 2.44542 | 1.27748   | 1.67689   | BGIOSGA013435 |                                                                                                                                                |
| TCONS_00011069 | 2.44579 | -1.10013  | -1.36812  | #N/A          | #N/A                                                                                                                                           |
| TCONS_00026883 | 2.44629 | 2.9599    | 2.45629   | BGIOSGA028940 | XP_015696186.1PREDICTED: uncharacterized protein LOC102704355<br>XP_006643763.1 putative pentatricopeptide repeat-containing protein At3g15200 |
| TCONS_00000225 | 2.44947 | 1.68333   | 0.723324  | BGIOSGA034929 | XP_006645375.1 probable calcium-binding protein CML31                                                                                          |
| TCONS_00005117 | 2.45224 | 2.30909   | 2.2446    | BGIOSGA034766 | XP_003574355.110 kDa chaperonin 1, chloroplasic                                                                                                |
| TCONS_00031650 | 2.45401 | 3.21907   | 2.98312   | BGIOSGA033465 |                                                                                                                                                |
| TCONS_00036444 | 2.45835 | 1.23728   | 0.119789  | BGIOSGA002132 | XP_020405856.1RING-H2 finger protein ATL70<br>XP_015689275.1 diacylglycerol O-acyltransferase 2-like                                           |
| TCONS_00008688 | 2.45965 | 3.21699   | 3.24913   | BGIOSGA005741 |                                                                                                                                                |
| TCONS_00013022 | 2.46076 | 2.45634   | 4.28385   | BGIOSGA000240 | XP_003559509.1beta-glucosidase 7                                                                                                               |
| TCONS_00027883 | 2.47617 | 2.43682   | 1.49117   | #N/A          | #N/A                                                                                                                                           |
| TCONS_00009781 | 2.48125 | 2.9011    | 3.97478   | BGIOSGA012334 | XP_006649848.1PREDICTED: uncharacterized protein LOC102714270                                                                                  |
| TCONS_00006065 | 2.48172 | 4.57745   | 2.64735   | BGIOSGA008220 | XP_015692423.1PREDICTED: uncharacterized protein LOC102719585<br>XP_006661892.2PREDICTED: uncharacterized protein LOC102706968                 |
| TCONS_00031368 | 2.48246 | 2.49871   | 1.72222   | BGIOSGA013299 | XP_004967936.1iron-sulfur assembly protein                                                                                                     |
| TCONS_00002667 | 2.49207 | 4.04517   | 2.9625    | BGIOSGA036185 | IscA-like 1, mitochondrial<br>XP_003607460.1transmembrane protein, putative                                                                    |
| TCONS_00037039 | 2.49509 | 2.19386   | 2.02884   | BGIOSGA040649 |                                                                                                                                                |
| TCONS_00015902 | 2.49795 | 2.60563   | 2.3435    | BGIOSGA004955 | XP_010227137.1scarecrow-like protein 23                                                                                                        |
| TCONS_00020404 | 2.50084 | 3.2669    | 1.90249   | BGIOSGA005634 | XP_006655942.1 protein BOBBER 1-like<br>XP_010234333.2uncharacterized protein LOC100828802 isoform X3                                          |
| TCONS_00026026 | 2.50345 | 3.05839   | 2.32959   | BGIOSGA032583 | XP_006664247.1 vesicle-associated membrane protein 722-like                                                                                    |
| TCONS_00036508 | 2.5041  | 4.12171   | 2.59101   | BGIOSGA026491 | XP_006652056.1 DIBOA-glucoside dioxygenase BX6-like                                                                                            |
| TCONS_00027962 | 2.50485 | 3.35209   | 3.09162   | BGIOSGA034073 |                                                                                                                                                |
| TCONS_00005096 | 2.50508 | 2.71239   | 1.00358   | BGIOSGA000110 | XP_006646678.2 phytochromobilin:ferredoxin oxidoreductase, chloroplasic<br>XP_015695878.1PREDICTED: uncharacterized protein LOC102714761       |
| TCONS_00027753 | 2.50618 | 0.0292297 | 2.10005   | BGIOSGA032131 |                                                                                                                                                |
| TCONS_00004730 | 2.50987 | 3.72014   | 3.94584   | BGIOSGA000003 | XP_004970585.1transcription factor MYB1<br>XP_015690958.1 histone-lysine N-methyltransferase ASHR1 isoform X1                                  |
| TCONS_00013028 | 2.5103  | 2.03392   | 2.73903   | BGIOSGA009959 | XP_006654841.1 glucose-1-phosphate adenylyltransferase large subunit, chloroplasic/amyloplastic                                                |
| TCONS_00019871 | 2.51098 | -1.1475   | -0.748055 | BGIOSGA024540 |                                                                                                                                                |
| TCONS_00026564 | 2.51683 | 2.3958    | 2.16259   | BGIOSGA030601 | XP_006659382.1PREDICTED: uncharacterized protein LOC102700820                                                                                  |
| TCONS_00012361 | 2.52599 | 3.66243   | 2.43734   | BGIOSGA010628 | XP_006651444.1PREDICTED: uncharacterized protein Osl_027940-like                                                                               |
| TCONS_00004169 | 2.53121 | 2.72331   | 3.22028   | BGIOSGA032085 | XP_006646197.1 NAC domain-containing protein 41-like                                                                                           |
| TCONS_00004346 | 2.53331 | -0.109232 | 0.649768  | BGIOSGA004403 | XP_015688100.1 BURP domain-containing protein 3                                                                                                |
| TCONS_00004361 | 2.5334  | 0.0507423 | 2.48885   | BGIOSGA020217 | NP_001142820.1uncharacterized LOC100275200                                                                                                     |
| TCONS_00031632 | 2.54172 | 1.19878   | 1.79872   | BGIOSGA035939 | XP_020402748.1ethylene-responsive transcription factor 5                                                                                       |
| TCONS_00013509 | 2.54231 | 3.74195   | 2.10533   | BGIOSGA026166 | XP_006654680.1 anthocyanidin 5,3-O-glucosyltransferase-like                                                                                    |
| TCONS_00024201 | 2.55105 | 3.82767   | 2.78578   | BGIOSGA010676 | XP_006658032.1 10 kDa chaperonin-like                                                                                                          |
| TCONS_00004023 | 2.55822 | 1.00459   | 1.311     | BGIOSGA023812 | XP_004969232.1cytochrome P450 CYP72A219<br>XP_002436640.2uncharacterized protein LOC8077304                                                    |
| TCONS_00021787 | 2.55948 | 0.862689  | -0.142936 | BGIOSGA029694 | XP_004979334.1serine/threonine-protein kinase CDG1                                                                                             |
| TCONS_00028459 | 2.56011 | 2.24936   | 0.381627  | BGIOSGA009690 |                                                                                                                                                |
| TCONS_00018761 | 2.56188 | #NA       | 1.56375   | BGIOSGA018660 | XP_015692753.1 stem 28 kDa glycoprotein-like                                                                                                   |
| TCONS_00001400 | 2.56594 | 1.3493    | 1.35621   | BGIOSGA026213 | XP_006646126.2 cytochrome P450 72A13-like<br>XP_021305075.1probable kinetochore protein NUF2 isoform X4                                        |
| TCONS_00021965 | 2.57568 | 2.39986   | 2.31682   | BGIOSGA021552 | XP_021302113.1CBS domain-containing protein CBSX1, chloroplasic-like isoform X1                                                                |
| TCONS_00015320 | 2.57937 | 2.44011   | 2.03093   | BGIOSGA009298 | XP_008680000.1proline-rich receptor-like protein kinase PERK7                                                                                  |
| TCONS_00007309 | 2.5794  | 2.56774   | 2.5622    | BGIOSGA032823 |                                                                                                                                                |
| TCONS_00001431 | 2.59708 | 2.5575    | 2.11681   | BGIOSGA014092 | XP_015692060.1 protein RADIALIS-like 4<br>XP_006660574.1 probable glutathione S-transferase GSTU1                                              |
| TCONS_00029916 | 2.59753 | 1.8322    | -0.207773 | BGIOSGA003150 |                                                                                                                                                |
| TCONS_00028309 | 2.6006  | 3.65276   | 3.69801   | BGIOSGA033528 | XP_006663119.1 xylanase inhibitor protein 2                                                                                                    |

## transcriptome

|                |         |          |           |               |                                                                                                               |
|----------------|---------|----------|-----------|---------------|---------------------------------------------------------------------------------------------------------------|
| TCONS_00029835 | 2.60156 | 2.53125  | 2.3171    | BGIOSGA008324 | XP_006661141.1PREDICTED: uncharacterized protein LOC102721107                                                 |
| TCONS_00001635 | 2.60305 | 3.62052  | 2.05037   | BGIOSGA008084 | XP_006646239.1 mitogen-activated protein kinase kinase kinase A-like                                          |
| TCONS_00018716 | 2.61349 | 0.139381 | 1.23545   | BGIOSGA002559 | XP_003568822.1 uncharacterized protein LOC100844174                                                           |
| TCONS_00006641 | 2.61839 | 1.36802  | 2.27961   | BGIOSGA030807 | XP_006647682.1 SPX domain-containing membrane protein Os02g45520                                              |
| TCONS_00015094 | 2.61935 | 3.10462  | 0.850962  | BGIOSGA005547 | XP_006652945.1 PREDICTED: uncharacterized protein LOC102717702                                                |
| TCONS_00008836 | 2.62774 | 2.45214  | 2.40573   | BGIOSGA010546 | XP_006647939.1 chaperone protein DnaJ-like XP_015692253.1 1-acyl-sn-glycerol-3-phosphate acyltransferase-like |
| TCONS_00014982 | 2.63286 | 2.59406  | 1.62599   | BGIOSGA006990 | XP_006658638.1 thylakoid lumenal 15.0 kDa protein 2, chloroplastic                                            |
| TCONS_00023834 | 2.63495 | 1.19118  | 1.34479   | BGIOSGA025865 | XP_006652233.2 pollen-specific protein C13-like                                                               |
| TCONS_00015809 | 2.63546 | 0.927559 | 1.82893   | BGIOSGA015177 | XP_006647951.1 TIMELESS-interacting protein                                                                   |
| TCONS_00008850 | 2.64574 | 3.32988  | 1.58067   | BGIOSGA005567 | XP_015695828.1 putative lysine-specific demethylase JMJD5                                                     |
| TCONS_00028273 | 2.64747 | 4.62783  | 4.72838   | BGIOSGA030559 | XP_006656395.1 calcium-binding protein KIC-like                                                               |
| TCONS_00021257 | 2.65801 | 0.466615 | 1.07881   | BGIOSGA000689 | XP_003576736.1 UDP-glucosyltransferase UGT13248                                                               |
| TCONS_00029350 | 2.66671 | 2.2851   | 0.182517  | BGIOSGA015346 | XP_006644248.1 PREDICTED: uncharacterized protein LOC102721967 isoform X1                                     |
| TCONS_00037068 | 2.66717 | 2.95194  | 2.50329   | BGIOSGA027666 | NP_001232814.1 subtilisin-chymotrypsin inhibitor homolog 1                                                    |
| TCONS_00003980 | 2.66861 | 0.255353 | 2.04802   | BGIOSGA003991 | XP_004984172.1 protein LNK1 isoform X2                                                                        |
| TCONS_00010212 | 2.67111 | 1.76267  | 2.24539   | BGIOSGA012776 | XP_024316072.1 uncharacterized protein LOC100826033                                                           |
| TCONS_00019173 | 2.68001 | 0.723989 | 1.22588   | BGIOSGA018179 | XP_004968812.2 protein LNK2 isoform X1                                                                        |
| TCONS_00000991 | 2.68315 | 0.523244 | 1.44572   | BGIOSGA003591 | XP_020406534.1 probable esterase PIR7A                                                                        |
| TCONS_00005044 | 2.68425 | 2.10118  | 3.22949   | BGIOSGA000175 | XP_015692753.1 stem 28 kDa glycoprotein-like                                                                  |
| TCONS_00018763 | 2.68691 | #NA      | 3.29812   | BGIOSGA021040 | XP_006648377.2 chaperone protein ClpB3, mitochondrial-like                                                    |
| TCONS_00007468 | 2.69372 | 4.43024  | 3.28443   | BGIOSGA007016 | XP_020403923.1 uncharacterized protein LOC100193640                                                           |
| TCONS_00015782 | 2.69802 | 0.689146 | 3.08449   | BGIOSGA002565 | XP_004294717.1 ubiquitin-conjugating enzyme E2-17 kDa                                                         |
| TCONS_00022312 | 2.70988 | 3.2336   | 2.0354    | BGIOSGA030459 | XP_006649987.1 galactinol synthase 2-like                                                                     |
| TCONS_00009951 | 2.71026 | 4.69833  | 2.16465   | BGIOSGA023687 |                                                                                                               |
| TCONS_00006538 | 2.71402 | 3.79468  | 3.14375   | BGIOSGA024360 | XP_010235772.1 hsp70-Hsp90 organizing protein                                                                 |
| TCONS_00011009 | 2.73017 | 0.640502 | 1.09833   | BGIOSGA011246 | XP_004981667.1 uncharacterized protein LOC101757550                                                           |
| TCONS_00025068 | 2.73381 | 0.635919 | 1.08942   | BGIOSGA011741 | XP_012699331.1 uncharacterized protein LOC101781276                                                           |
| TCONS_00004339 | 2.73547 | 0.955822 | 1.40727   | BGIOSGA020236 | XP_003568047.1 ubiquitin domain-containing protein 1                                                          |
| TCONS_00004548 | 2.74475 | 1.10868  | 1.91039   | BGIOSGA000659 | XP_006644834.1 PREDICTED: uncharacterized protein LOC102706426                                                |
| TCONS_00026978 | 2.74937 | 3.78399  | 2.93835   | BGIOSGA015287 | XP_006659596.1 70 kDa peptidyl-prolyl isomerase                                                               |
| TCONS_00029191 | 2.75855 | 2.69587  | 1.6127    | BGIOSGA021486 | XP_006660724.1 mavicyanin-like                                                                                |
| TCONS_00030631 | 2.75917 | 2.23998  | 0.704246  | BGIOSGA005659 | XP_002465578.1 U-box domain-containing protein 21                                                             |
| TCONS_00000275 | 2.76012 | 2.19159  | 2.60873   |               | #N/A                                                                                                          |
| TCONS_00030695 | 2.76442 | 3.03448  | 0.498291  |               | #N/A                                                                                                          |
| TCONS_00033915 | 2.76593 | 1.50654  | 1.70951   |               | #N/A                                                                                                          |
| TCONS_00023584 | 2.7661  | 5.12301  | 4.65251   | BGIOSGA025609 | XP_006657652.1 CASP-like protein 1D1                                                                          |
| TCONS_00013584 | 2.767   | 2.76824  | 2.59135   | BGIOSGA032849 | XP_003559098.1 ethylene-responsive transcription factor 1B                                                    |
| TCONS_00000775 | 2.77357 | 3.48248  | 2.54961   | BGIOSGA023731 | XP_015688352.1 serine/arginine-rich-splicing factor SR34-like isoform X1                                      |
| TCONS_00026068 | 2.79858 | 3.55146  | 2.48297   | BGIOSGA028138 | XP_015695809.1 nuclear transcription factor Y subunit A-7                                                     |
| TCONS_00008587 | 2.80028 | 2.67444  | 3.3572    | BGIOSGA020145 | XP_014755795.1 E3 ubiquitin-protein ligase RHA1B                                                              |
| TCONS_00008192 | 2.81489 | 2.52358  | 3.3554    | BGIOSGA000247 | XP_006648749.1 E3 ubiquitin-protein ligase EL5-like                                                           |
| TCONS_00028033 | 2.83187 | 1.67824  | 1.79883   | BGIOSGA017194 | XP_015695794.1 type IV inositol polyphosphate 5-phosphatase 9-like                                            |
| TCONS_00009611 | 2.83254 | 3.01618  | 2.31173   | BGIOSGA007799 | XP_015690414.1 allene oxide synthase 2-like                                                                   |
| TCONS_00033918 | 2.83339 | 3.3031   | 2.82059   | BGIOSGA032101 | XP_015697928.1 putative laccase-19                                                                            |
| TCONS_00022508 | 2.83568 | 3.02444  | 0.766952  | BGIOSGA040570 | XP_003560621.1 cyanidin 3-O-rutinoside 5-O-glucosyltransferase                                                |
| TCONS_00018064 | 2.86822 | 2.17305  | 3.47162   | BGIOSGA020114 | XP_006654595.2 DNA mismatch repair protein MSH5                                                               |
| TCONS_00001589 | 2.87958 | 2.06135  | 1.82104   | BGIOSGA013530 | XP_003567003.1 uncharacterized protein LOC100835323                                                           |
| TCONS_00018262 | 2.88404 | 0.860509 | 2.20922   | BGIOSGA023571 | XP_006654745.1 non-specific lipid-transfer protein 2-like                                                     |
| TCONS_00011231 | 2.90872 | 2.34743  | -0.552537 | BGIOSGA021533 | XP_006651964.1 zinc finger protein ZAT12-like                                                                 |
| TCONS_00023111 | 2.91897 | 1.7399   | 3.72222   | BGIOSGA025149 | XP_006657440.1 photosystem II 10 kDa polypeptide, chloroplastic-like                                          |
| TCONS_00030113 | 2.91909 | 3.01827  | 3.18974   | BGIOSGA005485 | XP_006660658.1 20 kDa chaperonin, chloroplastic-like                                                          |
| TCONS_00018072 | 2.92573 | 3.7053   | 2.49211   | BGIOSGA000865 | XP_006654602.1 UDP-glucosyltransferase 73E1-like                                                              |
| TCONS_00032229 | 2.92884 | 1.9673   | 0.718936  | BGIOSGA031908 | XP_006661781.1 1,2-dihydroxy-3-keto-5-methylthiopentane dioxxygenase 4                                        |
| TCONS_00036269 | 2.9356  | 2.57123  | 2.97493   | BGIOSGA035740 | XP_003568635.1 metallothionein-like protein 1                                                                 |
| TCONS_00026108 | 2.93776 | 3.77566  | 2.94919   |               | #N/A                                                                                                          |
| TCONS_00036822 | 2.94378 | 0.65232  | 2.44172   | BGIOSGA012722 | XP_002442971.1 subtilisin inhibitor                                                                           |

## transcriptome

|                |         |          |           |               |                                                                                                                    |
|----------------|---------|----------|-----------|---------------|--------------------------------------------------------------------------------------------------------------------|
| TCONS_00008786 | 2.95256 | 3.09993  | 2.79877   | BGIOSGA022608 | XP_004953899.1protein RNA-directed DNA methylation 3<br>XP_006644740.1 dynein light chain LC6, flagellar outer arm |
| TCONS_00001860 | 2.95351 | 0.513755 | 0.511041  | BGIOSGA004493 | XP_015692867.1 F-box protein At5g07610-like                                                                        |
| TCONS_00018705 | 2.96484 | 1.94771  | 4.82298   | BGIOSGA015576 | XP_006644839.1 subtilisin-like protease SBT3.5                                                                     |
| TCONS_00001965 | 2.96669 | 2.38594  | 1.60463   | BGIOSGA004599 | XP_015693559.1 probable carboxylesterase 18                                                                        |
| TCONS_00025609 | 2.96859 | 0.67343  | -0.847342 | BGIOSGA024335 | XP_006654200.1 non-specific lipid-transfer protein 4-like                                                          |
| TCONS_00018668 | 2.96971 | -3.18685 | 2.86341   | BGIOSGA025018 | XP_006643684.1 probable calcium-binding protein CML16                                                              |
| TCONS_00002772 | 2.97087 | 3.28741  | 2.45634   | BGIOSGA036429 | NP_001130454.1class I heat shock protein 3                                                                         |
| TCONS_00009745 | 2.97588 | 6.22431  | 3.01291   | BGIOSGA034220 | #N/A                                                                                                               |
| TCONS_00007872 | 2.98073 | 1.41601  | 1.83564   | #N/A          | #N/A                                                                                                               |
| TCONS_00021551 | 2.99122 | 4.40863  | 0.588649  | BGIOSGA022242 | XP_015694008.1PREDICTED: uncharacterized protein LOC107304440                                                      |
| TCONS_00009780 | 3.00817 | 3.7898   | 2.02912   | BGIOSGA039960 | XP_015690246.1 probable mediator of RNA polymerase II transcription subunit 37c                                    |
| TCONS_00021336 | 3.01801 | 3.16759  | 3.84675   | BGIOSGA007161 | XP_004966347.1 uncharacterized protein LOC101786331                                                                |
| TCONS_00000240 | 3.02062 | 0.639286 | -1.48896  | BGIOSGA034461 | XP_018685781.1 auxin-responsive protein SAUR71-like                                                                |
| TCONS_00027322 | 3.02558 | 0.951997 | 1.42941   | BGIOSGA019650 | XP_002445025.1aromatic-L-amino-acid decarboxylase                                                                  |
| TCONS_00008408 | 3.04505 | 4.08532  | 2.76912   | BGIOSGA006014 | XP_004953144.1RNA-binding protein 42                                                                               |
| TCONS_00014617 | 3.04907 | 3.54587  | 2.14066   | BGIOSGA024175 | XP_004976255.1 uncharacterized protein LOC101761960                                                                |
| TCONS_00009031 | 3.05756 | 3.27646  | 0.740689  | BGIOSGA033117 | XP_015688898.1 desumoylating isopeptidase 1-like                                                                   |
| TCONS_00029777 | 3.0676  | 1.29366  | 0.893043  | BGIOSGA024540 | XP_004956507.1glucose-1-phosphate adenylyltransferase small subunit 1, chloroplastic/amyloplastic                  |
| TCONS_00004271 | 3.0723  | 3.14084  | 2.74887   | #N/A          | #N/A                                                                                                               |
| TCONS_00027599 | 3.07435 | 4.20107  | 3.80176   | BGIOSGA028198 | XP_002444068.2BTB/POZ and MATH domain-containing protein 2                                                         |
| TCONS_00019003 | 3.08223 | 2.19139  | 2.02331   | BGIOSGA006925 | XP_004973266.1small heat shock protein, chloroplastic                                                              |
| TCONS_00037344 | 3.1051  | 1.81753  | 2.884     | BGIOSGA024120 | XP_003575482.1cellulose synthase-like protein D4                                                                   |
| TCONS_00032479 | 3.10862 | 3.24528  | 2.52428   | BGIOSGA033182 | XP_006661891.1PREDICTED: uncharacterized protein LOC102706684                                                      |
| TCONS_00035375 | 3.1556  | 2.79784  | 2.65774   | BGIOSGA034582 | XP_006663109.1 transcription factor MYB108-like                                                                    |
| TCONS_00018182 | 3.15613 | 1.45232  | 1.30674   | BGIOSGA011702 | NP_001150524.1nuclear protein                                                                                      |
| TCONS_00013011 | 3.16148 | 4.448    | 2.99794   | BGIOSGA034179 | XP_004982076.1pre-mRNA-splicing factor 18 isoform X2                                                               |
| TCONS_00002526 | 3.17326 | 2.04149  | -0.07929  | BGIOSGA033336 | XP_006645390.1 probable glutathione S-transferase isoform X1                                                       |
| TCONS_00028231 | 3.17635 | 1.77518  | 2.82811   | BGIOSGA027627 | XP_006660245.1 probable E3 ubiquitin-protein ligase XERICO                                                         |
| TCONS_00013093 | 3.18113 | 3.84046  | 3.29069   | BGIOSGA011437 | XP_006650520.1PREDICTED: uncharacterized protein LOC102721532                                                      |
| TCONS_00011091 | 3.18173 | 4.01822  | 2.17923   | BGIOSGA031907 | XP_006650701.1 dnaJ protein homolog                                                                                |
| TCONS_00027360 | 3.18484 | 4.29521  | 2.80671   | BGIOSGA000552 | XP_006659840.1PREDICTED: uncharacterized protein LOC102720900                                                      |
| TCONS_00020422 | 3.19324 | 3.7652   | 2.41134   | BGIOSGA005649 | XP_004965109.1 uncharacterized protein LOC101755681                                                                |
| TCONS_00020968 | 3.2029  | 0.687656 | 2.7106    | BGIOSGA006896 | XP_012700569.1 F-box/kelch-repeat protein At1g80440-like                                                           |
| TCONS_00023359 | 3.22708 | 2.98982  | 2.86273   | BGIOSGA025401 | XP_015694947.1 KHG/KDGP aldolase-like isoform X1                                                                   |
| TCONS_00035833 | 3.24807 | 4.57421  | 3.7612    | BGIOSGA012426 | XP_006664475.2 laccase-25                                                                                          |
| TCONS_00023207 | 3.25074 | 3.03338  | -0.726347 | BGIOSGA025248 | XP_004955631.1low molecular mass early light-inducible protein HV90, chloroplastic-like                            |
| TCONS_00006946 | 3.26349 | 4.77556  | 2.82893   | BGIOSGA026259 | XP_002452902.1universal stress protein PHOS32                                                                      |
| TCONS_00012456 | 3.27207 | 3.85559  | 4.02968   | BGIOSGA026090 | XP_015691115.1 probable 6-phosphogluconolactonase 1                                                                |
| TCONS_00011442 | 3.28813 | 4.83666  | 3.67296   | BGIOSGA005513 | XP_014752657.1heat shock 70 kDa protein, mitochondrial                                                             |
| TCONS_00003492 | 3.28907 | 3.15273  | 1.25013   | #N/A          | #N/A                                                                                                               |
| TCONS_00000342 | 3.29223 | 1.83572  | 2.94012   | BGIOSGA028873 | XP_015696633.1 putative nuclease HARBI1                                                                            |
| TCONS_00009655 | 3.29366 | 3.90075  | 2.13156   | BGIOSGA012199 | XP_004985069.1 uncharacterized protein LOC101755947                                                                |
| TCONS_00027084 | 3.3017  | 3.95543  | 3.49381   | #N/A          | #N/A                                                                                                               |
| TCONS_00012317 | 3.31102 | 3.96785  | 4.31787   | BGIOSGA010676 | XP_015690490.1 10 kDa chaperonin-like                                                                              |
| TCONS_00011230 | 3.31977 | 4.6636   | 2.75654   | BGIOSGA019993 | XP_006650804.1 zinc finger protein ZAT8-like                                                                       |
| TCONS_00011393 | 3.32833 | 4.18609  | 2.42694   | BGIOSGA011631 | XP_003559052.1probable pterin-4-alpha-carbinolamine dehydratase, chloroplastic                                     |
| TCONS_00022739 | 3.32937 | 4.77495  | 3.34962   | BGIOSGA004619 | XP_015693735.1 phosphoglycerate kinase, cytosolic                                                                  |
| TCONS_00030135 | 3.3371  | 4.75595  | 2.82749   | BGIOSGA038326 | XP_006660670.1 transmembrane protein 45B-like                                                                      |
| TCONS_00029247 | 3.33977 | 2.67142  | 2.45227   | BGIOSGA010184 | XP_006660755.1PREDICTED: uncharacterized protein LOC102706403                                                      |
| TCONS_00013788 | 3.35597 | 3.98556  | 3.31828   | BGIOSGA003467 | XP_015691885.1 senescence-specific cysteine protease SAG39-like                                                    |
| TCONS_00000841 | 3.36046 | 3.55723  | 3.10073   | BGIOSGA005419 | XP_008655899.1pyrophosphate-energized vacuolar membrane proton pump isoform X2                                     |
| TCONS_00013109 | 3.36215 | 4.63993  | 1.9631    | BGIOSGA009877 | XP_006650535.1 probable zinc metalloprotease EGY3, chloroplastic                                                   |
| TCONS_00020275 | 3.36938 | 4.49593  | 4.55611   | BGIOSGA006685 | XP_015693951.1 dnaJ homolog subfamily B member 6-like                                                              |
| TCONS_00036213 | 3.4549  | 3.25913  | 3.87556   | BGIOSGA037569 | XP_006664090.1 major pollen allergen AIn g 1-like                                                                  |
| TCONS_00024188 | 3.48574 | 4.51727  | 2.09402   | BGIOSGA026225 | XP_006658018.1 1-Cys peroxiredoxin B                                                                               |

transcriptome

|                |         |          |          |               |                                                                                                                 |
|----------------|---------|----------|----------|---------------|-----------------------------------------------------------------------------------------------------------------|
| TCONS_00001359 | 3.48777 | 1.00178  | 2.41177  | BGIOSGA001209 | XP_003569105.1subtilisin-chymotrypsin inhibitor Cl-1C<br>NP_001145418.2uncharacterized protein                  |
| TCONS_00035576 | 3.49441 | 4.3101   | 2.03058  | BGIOSGA034797 | LOC100278780<br>XP_006654949.1PREDICTED: uncharacterized protein At4g08330, chloroplastic-like                  |
| TCONS_00018542 | 3.49745 | 2.41358  | 3.34479  | BGIOSGA018891 | XP_006645407.1 probable aquaporin TIP1-2                                                                        |
| TCONS_00005196 | 3.50791 | 4.89045  | 1.78713  | BGIOSGA014594 | XP_002465645.1naringenin 7-O-methyltransferase<br>XP_015689447.1PREDICTED: uncharacterized protein LOC102706718 |
| TCONS_00040306 | 3.50856 | 2.5925   | 3.63874  | BGIOSGA031610 | XP_015689283.1 prohibitin-3, mitochondrial-like                                                                 |
| TCONS_00007324 | 3.56816 | 3.92453  | 3.77239  | BGIOSGA023562 | NP_001152908.1uncharacterized protein                                                                           |
| TCONS_00008250 | 3.57738 | 5.17192  | 3.8317   | BGIOSGA014948 | LOC100275640 precursor                                                                                          |
| TCONS_00003318 | 3.57877 | 2.12155  | 1.27502  | BGIOSGA000601 | #N/A                                                                                                            |
| TCONS_00006838 | 3.58616 | 3.36711  | 3.14345  | #N/A          | #N/A                                                                                                            |
| TCONS_00011801 | 3.61707 | 5.2107   | 5.11386  | BGIOSGA011204 | XP_006649645.1 heat shock 70 kDa protein 8<br>XP_006656391.1 protein HEAT-STRESS-ASSOCIATED 32                  |
| TCONS_00022792 | 3.62694 | 5.4344   | 3.86713  | BGIOSGA020661 | XP_015696524.1 protein FAR1-RELATED SEQUENCE 5-like                                                             |
| TCONS_00038355 | 3.63639 | 1.92646  | 3.60416  | BGIOSGA016849 | XP_006650814.1 hsp70 nucleotide exchange factor fes1-like                                                       |
| TCONS_00011243 | 3.64563 | 4.15211  | 2.94842  | BGIOSGA013843 | XP_015696603.1PREDICTED: uncharacterized protein LOC107304948                                                   |
| TCONS_00030292 | 3.64569 | 7.04006  | 4.28123  | BGIOSGA022835 | XP_015693506.1 26.2 kDa heat shock protein, mitochondrial-like                                                  |
| TCONS_00021867 | 3.68637 | 5.44566  | 4.48291  | BGIOSGA036129 | #N/A                                                                                                            |
| TCONS_00018604 | 3.69323 | 1.85956  | 0.392328 | #N/A          | #N/A                                                                                                            |
| TCONS_00037458 | 3.69942 | 2.60582  | 2.60696  | BGIOSGA003455 | XP_008382314.1 SKP1-like protein 1A                                                                             |
| TCONS_00026968 | 3.71013 | 2.83902  | 2.73223  | #N/A          | #N/A                                                                                                            |
| TCONS_00004939 | 3.73778 | 4.63114  | 3.66463  | BGIOSGA015819 | XP_006645203.1PREDICTED: uncharacterized protein LOC102719062                                                   |
| TCONS_00023088 | 3.74133 | 2.59237  | 2.8526   | BGIOSGA018041 | XP_006658263.2 transcription factor JUNGBRUNNEN 1-like<br>XP_002464920.1uncharacterized protein LOC8055632      |
| TCONS_00032717 | 3.75116 | 3.52334  | 2.74692  | BGIOSGA029664 | XP_015691344.1PREDICTED: uncharacterized protein LOC102714825                                                   |
| TCONS_00016776 | 3.76576 | 3.18483  | 4.17942  | BGIOSGA017707 | XP_004955631.1low molecular mass early light-inducible protein HV90, chloroplastic-like                         |
| TCONS_00000550 | 3.82882 | 3.0495   | 0.439002 | BGIOSGA024140 | XP_015697504.1 probable mediator of RNA polymerase II transcription subunit 37c                                 |
| TCONS_00002143 | 3.89364 | 5.39147  | 3.15062  | BGIOSGA007251 | XP_006652756.1 ubiquinol oxidase 2, mitochondrial-like                                                          |
| TCONS_00016546 | 3.89491 | 6.02125  | 4.19893  | BGIOSGA021182 | XP_006652880.1PREDICTED: uncharacterized protein LOC102721919                                                   |
| TCONS_00016690 | 3.92019 | 2.89691  | 4.92128  | BGIOSGA028054 | XP_002460125.1hepatoma-derived growth factor-related protein 2                                                  |
| TCONS_00028857 | 3.98386 | 3.77499  | 3.02036  | BGIOSGA030607 | XP_006652557.1 thioredoxin M2, chloroplastic                                                                    |
| TCONS_00016303 | 3.98935 | 4.14853  | 3.38532  | BGIOSGA005962 | XP_004976077.1endochitinase A                                                                                   |
| TCONS_00016169 | 3.99797 | 1.23238  | 4.60298  | BGIOSGA014806 | XP_004955631.1low molecular mass early light-inducible protein HV90, chloroplastic-like                         |
| TCONS_00023208 | 4.00499 | 3.61835  | -1.8605  | BGIOSGA003133 | XP_010231055.1uncharacterized protein LOC100845581 isoform X1                                                   |
| TCONS_00019753 | 4.03551 | 0.603856 | 2.33968  | BGIOSGA039012 | XP_004964557.1uncharacterized protein LOC101772275                                                              |
| TCONS_00036915 | 4.07018 | 5.06246  | 3.91172  | BGIOSGA005303 | XP_004954144.118.6 kDa class III heat shock protein                                                             |
| TCONS_00006972 | 4.12679 | 5.87898  | 2.48249  | BGIOSGA020012 | XP_004957414.1heat stress transcription factor B-2c isoform X2                                                  |
| TCONS_00030396 | 4.13438 | 5.46326  | 3.45104  | BGIOSGA008402 | XP_021319503.123.2 kDa heat shock protein                                                                       |
| TCONS_00014317 | 4.14096 | 7.93624  | 4.73237  | BGIOSGA031777 | XP_015690159.1 26.7 kDa heat shock protein, chloroplastic                                                       |
| TCONS_00009676 | 4.14163 | 10.0409  | 6.92339  | BGIOSGA009495 | XP_015693971.1 probable glutathione S-transferase                                                               |
| TCONS_00002525 | 4.15025 | 1.65898  | 0.884404 | BGIOSGA033321 | XP_006663565.1 barwin-like                                                                                      |
| TCONS_00033756 | 4.17271 | 3.41676  | 3.4223   | BGIOSGA033690 | XP_008656940.1uncharacterized protein LOC103636358                                                              |
| TCONS_00002414 | 4.17844 | 5.75251  | 4.33738  | BGIOSGA005057 | XP_006655883.1PREDICTED: uncharacterized protein LOC102707779                                                   |
| TCONS_00021794 | 4.21811 | 4.97841  | 4.33351  | BGIOSGA028789 | XP_015697910.1PREDICTED: uncharacterized protein LOC102700662 isoform X1                                        |
| TCONS_00033554 | 4.22714 | 2.55162  | 4.02697  | BGIOSGA035345 | XP_003563689.1F-box/kelch-repeat protein At1g80440                                                              |
| TCONS_00020967 | 4.24449 | 2.39882  | 3.58167  | BGIOSGA012669 | XP_017632921.1 metallothiol transferase FosB-like isoform X2                                                    |
| TCONS_00014673 | 4.26499 | 4.3043   | 4.60272  | BGIOSGA019259 | XP_003559738.1protein LIFEGUARD 2                                                                               |
| TCONS_00010940 | 4.27114 | 7.5516   | 4.96574  | BGIOSGA024725 | XP_003580258.1berberine bridge enzyme-like 18                                                                   |
| TCONS_00022397 | 4.27657 | 4.28984  | 3.89567  | BGIOSGA000355 | XP_002442097.1laccase-25 isoform X2                                                                             |
| TCONS_00035831 | 4.27695 | 4.79837  | 5.38015  | BGIOSGA032101 | XP_006644731.1 calycylin-binding protein-like                                                                   |
| TCONS_00004424 | 4.2971  | 5.91934  | 4.41997  | BGIOSGA000799 | XP_006652583.1 hsp70-Hsp90 organizing protein-like                                                              |
| TCONS_00014672 | 4.29992 | 5.80719  | 3.96717  | BGIOSGA016840 | XP_015693353.1 chaperone protein ClpB1 isoform X2                                                               |
| TCONS_00019643 | 4.32197 | 5.92353  | 3.32717  | BGIOSGA008010 | XP_006649853.1 heat shock cognate 70 kDa protein-like                                                           |
| TCONS_00012008 | 4.42804 | 8.02961  | 5.14229  | BGIOSGA027612 | XP_002446950.1heat stress transcription factor B-2a                                                             |
| TCONS_00014765 | 4.45882 | 5.23742  | 2.87144  | BGIOSGA030902 | XP_004962216.1probable calcium-binding protein CML10                                                            |
| TCONS_00019197 | 4.46585 | 3.32433  | 3.77289  | BGIOSGA027974 | XP_006647987.1PREDICTED: uncharacterized protein LOC102705788                                                   |
| TCONS_00008896 | 4.47474 | 4.33158  | 3.88702  | BGIOSGA033266 | XP_006643681.1 16.9 kDa class I heat shock protein 3                                                            |
| TCONS_00002773 | 4.49487 | 8.40194  | 5.88739  | BGIOSGA011773 |                                                                                                                 |

## transcriptome

|                |         |            |           |                      |                                                                                                                 |
|----------------|---------|------------|-----------|----------------------|-----------------------------------------------------------------------------------------------------------------|
| TCONS_00019466 | 4.49727 | 7.61765    | 5.48274   | BGIOSGA023692        | XP_006654529.1 UPF0098 protein<br>CPn_0877/CP_0992/CPJ0877/CpB0906<br>XP_004984667.117.9 kDa class I heat shock |
| TCONS_00009741 | 4.57819 | 8.08257    | 6.06602   | <b>BGIOSGA027760</b> | protein<br>XP_002438106.1ATP-dependent zinc                                                                     |
| TCONS_00021913 | 4.58242 | 5.70363    | 4.72328   | BGIOSGA018314        | metalloprotease FTSH 6, chloroplastic                                                                           |
| TCONS_00028250 | 4.58325 | 6.3365     | 4.38063   | BGIOSGA020527        | XP_006659551.2 heat shock protein 81-1<br>XP_021319505.1uncharacterized protein                                 |
| TCONS_00014806 | 4.62382 | 4.10288    | 4.10494   | BGIOSGA016976        | LOC110436549<br>XP_006643647.1 isoflavone reductase homolog                                                     |
| TCONS_00002670 | 4.6956  | 1.97791    | 1.87082   | BGIOSGA021240        | IRL-like<br>NP_001145418.2uncharacterized protein                                                               |
| TCONS_00032964 | 4.7421  | 6.96967    | 6.08646   | BGIOSGA036988        | LOC100278780<br>XP_006649810.1 17.9 kDa class I heat shock                                                      |
| TCONS_00011968 | 4.81786 | 8.3991     | 4.93358   | BGIOSGA006868        | protein isoform X2<br>XP_006649338.1 coiled-coil domain-containing                                              |
| TCONS_00009247 | 4.84571 | 4.75393    | 4.8459    | BGIOSGA011777        | protein 124-like<br>XP_010231300.1probable mediator of RNA                                                      |
| TCONS_00019437 | 4.89544 | 6.83149    | 4.59065   | BGIOSGA000999        | polymerase II transcription subunit 37c<br>XP_006646410.1PREDICTED: uncharacterized                             |
| TCONS_00031904 | 4.90944 | 5.21446    | 2.79688   | BGIOSGA025327        | protein LOC102716000                                                                                            |
| TCONS_00005233 | 4.93831 | 8.02283    | 5.13219   | BGIOSGA006310        | XP_005846821.140S ribosomal protein S14<br>XP_004973094.1zinc finger protein CONSTANS-                          |
| TCONS_00026221 | 4.9757  | 3.33075    | 2.73438   | BGIOSGA013566        | LIKE 1<br>XP_006654784.1 dnaJ homolog subfamily B                                                               |
| TCONS_00019793 | 5.07061 | 5.9842     | 3.82219   | BGIOSGA013691        | member 4-like                                                                                                   |
| TCONS_00018603 | 5.17691 | 5.01548    | 3.12929   | #N/A                 | #N/A                                                                                                            |
| TCONS_00009747 | 5.26426 | 7.91059    | 5.56292   | <b>BGIOSGA030125</b> | XP_004984667.117.9 kDa class I heat shock                                                                       |
| TCONS_00032478 | 5.31132 | 5.48096    | 3.59135   | BGIOSGA018089        | protein LOC102706968<br>XP_003564488.117.5 kDa class II heat shock                                              |
| TCONS_00002977 | 5.35533 | 7.90922    | 5.7781    | BGIOSGA034220        | protein<br>XP_015689369.1 BAG family molecular                                                                  |
| TCONS_00005798 | 6.07539 | 7.38292    | 6.41402   | BGIOSGA007915        | chaperone regulator 6-like isoform X1<br>XP_006653075.1 photosystem II 22 kDa protein,                          |
| TCONS_00015222 | 6.36306 | 6.28214    | 2.2467    | BGIOSGA019271        | chloroplastic-like<br>XP_006664928.1 heat shock protein 83                                                      |
| TCONS_00013612 | 6.44512 | 9.66497    | 7.09943   | BGIOSGA015767        | XP_004979327.1cilia- and flagella-associated                                                                    |
| TCONS_00034912 | 6.49232 | 6.83804    | 4.21256   | BGIOSGA029105        | protein 91<br>XP_006659656.1 heat stress transcription factor                                                   |
| TCONS_00028426 | 6.72648 | 7.03458    | 5.13885   | BGIOSGA010673        | B-2b-like<br>NP_001151645.1ubiquitin-protein ligase CIP8                                                        |
| TCONS_00005767 | 6.86996 | 5.90306    | 4.38378   | BGIOSGA002634        | XP_006647931.1 24.1 kDa heat shock protein,                                                                     |
| TCONS_00034693 | 7.19904 | 7.88821    | 6.76463   | BGIOSGA021653        | mitochondrial-like<br>XP_006652190.2 70 kDa peptidyl-prolyl                                                     |
| TCONS_00015689 | 7.44049 | 9.83108    | 7.72459   | BGIOSGA029030        | isomerase-like<br>XP_011621821.1small EDRK-rich factor 2                                                        |
| TCONS_00016607 | 7.78963 | 7.7686     | 6.77111   | BGIOSGA000278        | XP_006662949.1 somatic embryogenesis                                                                            |
| TCONS_00034927 | 8.33347 | 6.81535    | 8.33753   | BGIOSGA021625        | receptor kinase 2-like<br>XP_006660291.1PREDICTED: uncharacterized                                              |
| TCONS_00028319 | 8.35612 | 7.36325    | 4.75919   | BGIOSGA024093        | protein LOC102699804<br>XP_006655971.1 16.0 kDa heat shock protein,                                             |
| TCONS_00021992 | 8.91371 | 10.5355    | 8.44903   | BGIOSGA016481        | peroxisomal<br>XP_015691543.1 protein kinase APK1B,                                                             |
| TCONS_00028850 | #NA     | #NA        | #NA       | BGIOSGA000015        | chloroplastic<br>XP_015690602.1 transmembrane emp24 domain-                                                     |
| TCONS_00009994 | #NA     | #NA        | #NA       | BGIOSGA000392        | containing protein p24delta9-like<br>XP_024313537.15'-3' exoribonuclease 4-like                                 |
| TCONS_00037877 | #NA     | -1.71591   | -2.2995   | BGIOSGA000413        | XP_015688198.1 interactor of constitutive active                                                                |
| TCONS_00037649 | #NA     | -0.758714  | #NA       | BGIOSGA000542        | ROPs 4-like<br>XP_006661992.1 NAC domain-containing protein                                                     |
| TCONS_00031526 | #NA     | #NA        | #NA       | BGIOSGA000598        | 105-like<br>XP_015696560.1 ethylene-responsive                                                                  |
| TCONS_00040348 | #NA     | #NA        | #NA       | BGIOSGA001061        | transcription factor RAP2-2-like<br>XP_006663022.1 hexose carrier protein HEX6-                                 |
| TCONS_00033766 | #NA     | -0.0383546 | -4.09814  | BGIOSGA001123        | like<br>XP_015691026.1 transcriptional corepressor                                                              |
| TCONS_00011383 | #NA     | #NA        | #NA       | BGIOSGA001244        | LEUNIG_HOMOLOG-like isoform X1<br>XP_015690891.1PREDICTED: uncharacterized                                      |
| TCONS_00011266 | #NA     | #NA        | #NA       | BGIOSGA001387        | protein LOC102721534<br>XP_015698858.1 soluble inorganic                                                        |
| TCONS_00004781 | #NA     | -1.40085   | -1.57691  | BGIOSGA001775        | pyrophosphatase-like<br>XP_003568494.1membrane protein PM19L                                                    |
| TCONS_00017773 | #NA     | #NA        | -0.301965 | BGIOSGA002001        | XP_006655086.1PREDICTED: uncharacterized                                                                        |
| TCONS_00018801 | #NA     | 0.204969   | 1.05488   | BGIOSGA002177        | protein LOC102721554<br>XP_009380667.1 histone H2B.11                                                           |
| TCONS_00017944 | #NA     | #NA        | 0.091547  | BGIOSGA002380        | XP_015696260.1 probable purine permease 5<br>XP_006643674.1 glycerophosphodiester                               |
| TCONS_00026425 | #NA     | #NA        | #NA       | BGIOSGA002458        | phosphodiesterase protein kinase domain-                                                                        |
| TCONS_00038061 | #NA     | -2.39647   | #NA       | BGIOSGA002512        | containing GDPDL2-like<br>XP_004961186.1probable DNA-3-methyladenine                                            |
| TCONS_00002705 | #NA     | -0.356901  | #NA       | BGIOSGA002516        | glycosylase 2                                                                                                   |
| TCONS_00020792 | #NA     | -1.33333   | -1.85655  | BGIOSGA002596        | XP_008792664.1 arabinogalactan peptide 16-like<br>XP_014753939.1uncharacterized protein                         |
| TCONS_00008610 | #NA     | #NA        | -2.1375   | BGIOSGA002880        | LOC100821692<br>XP_015693627.1PREDICTED: uncharacterized                                                        |
| TCONS_00000321 | #NA     | 1.22546    | 1.09833   | BGIOSGA002896        | protein LOC102714874<br>XP_006645654.1 mitochondrial carrier protein                                            |
| TCONS_00000458 | #NA     | 0.643099   | 0.103223  | BGIOSGA003033        | MTM1-like<br>XP_006658904.2PREDICTED: uncharacterized                                                           |
| TCONS_00024249 | #NA     | -1.37422   | #NA       | BGIOSGA003036        | protein LOC102712743                                                                                            |
| TCONS_00002009 | #NA     | -2.3174    | -2.91794  | BGIOSGA003049        | XP_006644864.2 cytochrome P450 94B3-like                                                                        |

transcriptome

|                |     |           |           |               |                                                                          |
|----------------|-----|-----------|-----------|---------------|--------------------------------------------------------------------------|
| TCONS_00013857 | #NA | #NA       | #NA       | BGIOSGA003091 | XP_006652144.1 UDP-glycosyltransferase 92A1-like                         |
| TCONS_00003226 | #NA | #NA       | #NA       | BGIOSGA003141 | XP_006643992.2 pathogen-related protein-like isoform X1                  |
| TCONS_00000631 | #NA | #NA       | #NA       | BGIOSGA003215 | XP_015690170.1PREDICTED: uncharacterized protein LOC107303823            |
| TCONS_00017297 | #NA | -2.39709  | 0.0157661 | BGIOSGA003522 | XP_004984389.1probable serine/threonine-protein kinase At1g54610         |
| TCONS_00002139 | #NA | #NA       | #NA       | BGIOSGA003738 | XP_002456606.1zinc finger protein AZF2                                   |
| TCONS_00005083 | #NA | -1.78834  | -1.74587  | BGIOSGA003963 | XP_002459082.1amino-acid permease BAT1 homolog                           |
| TCONS_00000376 | #NA | -0.300475 | #NA       | BGIOSGA004125 | XP_003567849.1ketol-acid reductoisomerase, chloroplastic                 |
| TCONS_00014109 | #NA | #NA       | #NA       | BGIOSGA004194 | NP_001147405.1drought-induced protein 1 precursor                        |
| TCONS_00016724 | #NA | #NA       | #NA       | BGIOSGA004363 | XP_006652908.1 36.4 kDa proline-rich protein-like                        |
| TCONS_00009795 | #NA | #NA       | 1.28537   | BGIOSGA004763 | XP_006649869.1PREDICTED: uncharacterized protein LOC102720412            |
| TCONS_00002171 | #NA | -1.89249  | 0.182471  | BGIOSGA004803 | XP_003564612.2uncharacterized protein LOC100824890                       |
| TCONS_00002404 | #NA | -3.56052  | -0.332583 | BGIOSGA005043 | XP_006645220.1 cysteine proteinase inhibitor 5-like                      |
| TCONS_00015421 | #NA | 0.947044  | 0.0666073 | BGIOSGA005085 | XP_003581062.1transcription factor PCF1                                  |
| TCONS_00021093 | #NA | #NA       | #NA       | BGIOSGA005097 | XP_003567424.3trihelix transcription factor ASR3                         |
| TCONS_00035552 | #NA | #NA       | #NA       | BGIOSGA005182 | XP_006662727.1 two-component response regulator ORR9                     |
| TCONS_00025320 | #NA | -4.49512  | -3.0929   | BGIOSGA005286 | XP_014757092.1cyclin-D6-1 isoform X1                                     |
| TCONS_00010629 | #NA | #NA       | #NA       | BGIOSGA005308 | XP_004982242.1auxin-responsive protein SAUR71                            |
| TCONS_00032617 | #NA | -2.86829  | #NA       | BGIOSGA005583 | XP_006662548.2PREDICTED: uncharacterized protein LOC102702694            |
| TCONS_00008831 | #NA | -2.69745  | -1.25676  | BGIOSGA005594 | XP_006647926.1 EPIDERMAL PATTERNING FACTOR-like protein 1                |
| TCONS_00008766 | #NA | #NA       | #NA       | BGIOSGA005668 | XP_008679096.2rho guanine nucleotide exchange factor 18                  |
| TCONS_00006558 | #NA | -0.788571 | #NA       | BGIOSGA006339 | XP_002466854.1ent-cassadiene C2-hydroxylase                              |
| TCONS_00001367 | #NA | -1.39992  | -0.575028 | BGIOSGA006628 | XP_022683114.1berberine bridge enzyme-like 13                            |
| TCONS_00025112 | #NA | #NA       | #NA       | BGIOSGA006833 | XP_006658566.1 calmodulin-binding transcription activator 6-like         |
| TCONS_00007652 | #NA | #NA       | 0.421776  | BGIOSGA006834 | XP_002451823.1protodermal factor 1                                       |
| TCONS_00005253 | #NA | 0.110335  | -2.80604  | BGIOSGA006849 | XP_003570794.1linolenate hydroperoxide lyase, chloroplastic              |
| TCONS_00036908 | #NA | 2.45478   | 0.111128  | BGIOSGA007400 | XP_014755448.1uncharacterized protein LOC104583915                       |
| TCONS_00000655 | #NA | #NA       | #NA       | BGIOSGA007409 | XP_004967717.1ubiquitin-conjugating enzyme E2 20                         |
| TCONS_00005774 | #NA | #NA       | #NA       | BGIOSGA007888 | XP_010234101.1RING-H2 finger protein ATL80                               |
| TCONS_00005894 | #NA | #NA       | #NA       | BGIOSGA008024 | XP_021313205.1tyrosine aminotransferase isoform X1                       |
| TCONS_00015870 | #NA | #NA       | #NA       | BGIOSGA008110 | XP_024311269.1protein IDA-LIKE 2                                         |
| TCONS_00024966 | #NA | -2.98805  | 0.225975  | BGIOSGA008280 | XP_003571392.2ethylene-responsive transcription factor 15                |
| TCONS_00002436 | #NA | #NA       | #NA       | BGIOSGA008285 | XP_006645248.1PREDICTED: uncharacterized protein LOC102707917            |
| TCONS_00006335 | #NA | -0.262028 | #NA       | BGIOSGA008499 | XP_006648787.1PREDICTED: uncharacterized protein LOC102714988            |
| TCONS_00006426 | #NA | #NA       | #NA       | BGIOSGA008590 | XP_015689051.1PREDICTED: uncharacterized protein LOC102723018 isoform X1 |
| TCONS_00025466 | #NA | #NA       | #NA       | BGIOSGA008775 | XP_006647657.1 purine-uracil permease NCS1                               |
| TCONS_00029750 | #NA | 0.203103  | 0.0504783 | BGIOSGA009118 | XP_006655211.1 probable WRKY transcription factor 26                     |
| TCONS_00016019 | #NA | -0.34768  | #NA       | BGIOSGA009514 | XP_003581316.1cell number regulator 2                                    |
| TCONS_00022162 | #NA | -3.19941  | -2.78067  | BGIOSGA010030 | XP_020204317.1T-complex protein 1 subunit eta                            |
| TCONS_00001759 | #NA | -0.342075 | 0.714256  | BGIOSGA010789 | XP_021315253.1outer envelope protein 64, mitochondrial                   |
| TCONS_00000700 | #NA | #NA       | #NA       | BGIOSGA010954 | XP_020405382.1hydrophobic protein LT16B isoform X1                       |
| TCONS_00031276 | #NA | -1.31085  | -0.822397 | BGIOSGA011010 | XP_003568996.1E3 ubiquitin-protein ligase XB3                            |
| TCONS_00011733 | #NA | #NA       | 0.225975  | BGIOSGA011366 | XP_006649569.1 homeobox-leucine zipper protein HOX12                     |
| TCONS_00000884 | #NA | #NA       | #NA       | BGIOSGA011426 | XP_015693646.1 peroxiredoxin-2E-1, chloroplastic                         |
| TCONS_00031211 | #NA | #NA       | #NA       | BGIOSGA011435 | XP_006662392.1 cell division cycle protein 48 homolog                    |
| TCONS_00012567 | #NA | #NA       | #NA       | BGIOSGA011508 | XP_015689953.1 tyrosine N-monooxygenase-like                             |
| TCONS_00028738 | #NA | -1.27405  | -2.44881  | BGIOSGA011893 | XP_021319031.1probable receptor-like protein kinase At5g59700            |
| TCONS_00009511 | #NA | 1.64742   | -1.47383  | BGIOSGA012060 | XP_015689805.1PREDICTED: uncharacterized protein LOC102707941            |
| TCONS_00026624 | #NA | 1.1221    | 0.203098  | BGIOSGA012334 | XP_006649848.1PREDICTED: uncharacterized protein LOC102714270            |
| TCONS_00023198 | #NA | -2.20694  | -2.79674  | BGIOSGA012354 | XP_006657493.1 non-specific lipid transfer protein GPI-anchored 2-like   |
| TCONS_00037391 | #NA | #NA       | #NA       | BGIOSGA012380 | XP_004962696.1metallothionein-like protein 4B                            |
| TCONS_00019919 | #NA | -3.53293  | -2.07838  | BGIOSGA012615 | XP_006658940.2 inactive beta-amylase 9-like                              |
| TCONS_00027648 | #NA | #NA       | 1.02286   | BGIOSGA012665 | XP_006659970.2 protein GLUTAMINE DUMPER 5                                |
| TCONS_00035629 | #NA | 1.18451   | 0.68693   | BGIOSGA013031 | XP_006651578.1PREDICTED: uncharacterized protein LOC102705520            |

transcriptome

|                |     |           |           |               |                                                                                 |
|----------------|-----|-----------|-----------|---------------|---------------------------------------------------------------------------------|
| TCONS_00010678 | #NA | #NA       | -0.84878  | BGIOSGA013301 | XP_008665154.2 uncharacterized protein LOC100278494                             |
| TCONS_00016725 | #NA | #NA       |           | BGIOSGA013500 | XP_006652909.2 putative lipid-binding protein AIR1                              |
| TCONS_00023514 | #NA | -1.36886  | #NA       | BGIOSGA013608 | XP_004966150.1 pentatricopeptide repeat-containing protein At1g63330            |
| TCONS_00011006 | #NA | -0.401231 | 0.177211  | BGIOSGA013611 | XP_006650633.1 probable prolyl 4-hydroxylase 9                                  |
| TCONS_00010900 | #NA | 0.378739  | 0.515776  | BGIOSGA013792 | XP_015690474.1 PREDICTED: uncharacterized protein LOC102706826 isoform X1       |
| TCONS_00033320 | #NA | #NA       | 0.606537  | BGIOSGA014272 | XP_006664858.2 uncharacterized HIT-like protein MT1300                          |
| TCONS_00013159 | #NA | #NA       | #NA       | BGIOSGA014332 | XP_012704129.1 heat stress transcription factor A-2a                            |
| TCONS_00018638 | #NA | #NA       | #NA       | BGIOSGA014525 | XP_008674047.1 glutaredoxin-C1                                                  |
| TCONS_00016252 | #NA | #NA       | #NA       | BGIOSGA014722 | XP_002448179.2 beta-glucosidase 18 isoform X1                                   |
| TCONS_00036088 | #NA | #NA       | #NA       | BGIOSGA014798 | XP_006664049.1 ubiquitin-like-conjugating enzyme ATG10                          |
| TCONS_00017768 | #NA | #NA       | #NA       | BGIOSGA014808 | XP_006655296.1 chitinase 2-like                                                 |
| TCONS_00016134 | #NA | #NA       | #NA       | BGIOSGA014841 | XP_006652434.1 mitotic spindle checkpoint protein MAD2                          |
| TCONS_00012257 | #NA | #NA       | -0.931912 | BGIOSGA015233 | XP_006650073.1 flowering-promoting factor 1-like protein 5                      |
| TCONS_00006455 | #NA | -1.3595   | #NA       | BGIOSGA015285 | XP_022683144.1 LRR receptor-like serine/threonine-protein kinase EFR isoform X1 |
| TCONS_00000141 | #NA | #NA       | #NA       | BGIOSGA015452 | XP_015698546.1 PREDICTED: uncharacterized protein LOC102718683                  |
| TCONS_00027955 | #NA | #NA       | #NA       | BGIOSGA015531 | XP_003557259.1 cell division control protein 48 homolog C                       |
| TCONS_00018878 | #NA | #NA       | #NA       | BGIOSGA015778 | XP_006652080.2 G patch domain-containing protein 8                              |
| TCONS_00029294 | #NA | #NA       | -3.00522  | BGIOSGA016191 | XP_004957270.1 quinone-oxidoreductase QR1, chloroplastic                        |
| TCONS_00032668 | #NA | #NA       | #NA       | BGIOSGA016314 | XP_006662037.1 cortical cell-delineating protein-like                           |
| TCONS_00029543 | #NA | #NA       | #NA       | BGIOSGA016443 | XP_015691981.1 PREDICTED: uncharacterized protein LOC102710060                  |
| TCONS_00030189 | #NA | -2.73061  | #NA       | BGIOSGA017005 | XP_006661330.2 purine permease 3-like                                           |
| TCONS_00005986 | #NA | #NA       | #NA       | BGIOSGA017095 | NP_001142704.1 uncharacterized LOC100275021                                     |
| TCONS_00014932 | #NA | -0.661119 | -1.57128  | BGIOSGA017126 | XP_021310429.1 uncharacterized protein LOC8081017 isoform X2                    |
| TCONS_00014813 | #NA | #NA       | #NA       | BGIOSGA017343 | XP_014661026.1 uncharacterized protein LOC106804439                             |
| TCONS_00019786 | #NA | #NA       | -0.863849 | BGIOSGA017573 | XP_006654780.1 PREDICTED: uncharacterized protein LOC102719298                  |
| TCONS_00002640 | #NA | #NA       | #NA       | BGIOSGA017910 | XP_006400900.1 probable histone H2A.7                                           |
| TCONS_00018267 | #NA | -4.1042   | -2.11321  | BGIOSGA018221 | XP_006654751.1 PREDICTED: uncharacterized protein LOC102711155 isoform X3       |
| TCONS_00006382 | #NA | #NA       | #NA       | BGIOSGA018358 | XP_021302071.1 putative disease resistance protein RGA1 isoform X1              |
| TCONS_00031900 | #NA | #NA       | #NA       | BGIOSGA018401 | XP_004987289.1 probable pyridoxal 5'-phosphate synthase subunit PDX1.1          |
| TCONS_00016967 | #NA | #NA       | #NA       | BGIOSGA019018 | XP_006653952.1 PREDICTED: uncharacterized protein LOC102712534                  |
| TCONS_00002637 | #NA | #NA       | -0.553781 | BGIOSGA019038 | XP_006645400.1 outer envelope pore protein 16, chloroplastic-like isoform X1    |
| TCONS_00000939 | #NA | -2.98174  | -2.56856  | BGIOSGA019178 | XP_004968763.1 probable glutathione S-transferase GSTF1                         |
| TCONS_00011465 | #NA | #NA       | #NA       | BGIOSGA019297 | XP_018683622.1 putative nuclease HARBI1                                         |
| TCONS_00017462 | #NA | 1.02578   | -0.551895 | BGIOSGA019537 | XP_006654207.2 peptide chain release factor 1 isoform X1                        |
| TCONS_00017647 | #NA | #NA       | #NA       | BGIOSGA019710 | XP_015693061.1 caffeoylshikimate esterase isoform X1                            |
| TCONS_00010680 | #NA | 1.52486   | 1.00747   | BGIOSGA019818 | XP_006650402.1 DUF21 domain-containing protein At2g14520 isoform X1             |
| TCONS_00003217 | #NA | #NA       | -1.9808   | BGIOSGA019837 | XP_003565579.1 membrane protein PM19L                                           |
| TCONS_00023668 | #NA | #NA       | -1.27575  | BGIOSGA019859 | XP_003563122.1 xyloglucan endotransglucosylase/hydrolase protein 31             |
| TCONS_00017219 | #NA | 0.0499255 | #NA       | BGIOSGA020045 | XP_006365559.1 DNA replication licensing factor MCM3 homolog 2                  |
| TCONS_00021344 | #NA | #NA       | #NA       | BGIOSGA020317 | XP_006656462.1 non-specific lipid-transfer protein 2P-like                      |
| TCONS_00018362 | #NA | -1.97336  | #NA       | BGIOSGA020413 | XP_004961141.1 uncharacterized protein LOC101777254                             |
| TCONS_00021785 | #NA | #NA       | #NA       | BGIOSGA020583 | XP_004964614.1 auxin-responsive protein SAUR21                                  |
| TCONS_00019718 | #NA | #NA       | #NA       | BGIOSGA020684 | NP_001144696.2 uncharacterized protein LOC100277731                             |
| TCONS_00018263 | #NA | #NA       | #NA       | BGIOSGA020837 | XP_015692930.1 non-specific lipid-transfer protein 2-like                       |
| TCONS_00020717 | #NA | -1.31085  | 1.1776    | BGIOSGA020863 | XP_015698206.1 scarecrow-like protein 3                                         |
| TCONS_00022471 | #NA | 2.25406   | 1.14727   | BGIOSGA020981 | XP_015694334.1 protein NRT1/ PTR FAMILY 4.6-like isoform X3                     |
| TCONS_00024488 | #NA | #NA       | #NA       | BGIOSGA021093 | XP_006658233.1 PREDICTED: uncharacterized protein LOC102719504                  |
| TCONS_00003911 | #NA | #NA       | #NA       | BGIOSGA021330 | XP_017698956.1 transcription repressor OFP14-like                               |
| TCONS_00000151 | #NA | #NA       | #NA       | BGIOSGA021524 | XP_008780653.1 16.9 kDa class I heat shock protein 2                            |
| TCONS_00002774 | #NA | #NA       | #NA       | BGIOSGA021524 | XP_008780653.1 16.9 kDa class I heat shock protein 2                            |
| TCONS_00021311 | #NA | #NA       | #NA       | BGIOSGA021533 | XP_006657291.1 cleavage stimulation factor subunit 2-like                       |

## transcriptome

|                |     |           |           |               |                                                                                                               |
|----------------|-----|-----------|-----------|---------------|---------------------------------------------------------------------------------------------------------------|
| TCONS_00034144 | #NA | #NA       | #NA       | BGIOSGA021625 | XP_006662949.1 somatic embryogenesis receptor kinase 2-like                                                   |
| TCONS_00007024 | #NA | #NA       | #NA       | BGIOSGA021784 | XP_017625336.1 60S ribosomal protein L39                                                                      |
| TCONS_00004869 | #NA | #NA       | #NA       | BGIOSGA021802 | XP_020400388.1 UDP-glycosyltransferase 73E1-like                                                              |
| TCONS_00035954 | #NA | #NA       | -2.80181  | BGIOSGA021888 | XP_022684475.1 uncharacterized protein LOC101758323                                                           |
| TCONS_00029717 | #NA | -1.39647  | #NA       | BGIOSGA022071 | XP_010935122.1 SKP1-like protein 1A                                                                           |
| TCONS_00018631 | #NA | -0.365112 | #NA       | BGIOSGA022258 | XP_021316639.1 probable receptor-like protein kinase At2g42960                                                |
| TCONS_00005920 | #NA | -0.370536 | #NA       | BGIOSGA022335 | XP_006648574.1 vacuolar cation/proton exchanger 1c-like                                                       |
| TCONS_00002551 | #NA | #NA       | #NA       | BGIOSGA022398 | XP_006645374.1 putative calcium-binding protein CML19                                                         |
| TCONS_00008491 | #NA | #NA       | 0.0711755 | BGIOSGA022596 | XP_022681206.1 uncharacterized protein LOC101757949 isoform X2                                                |
| TCONS_00020081 | #NA | #NA       | 0.0983329 | BGIOSGA022725 | XP_002468294.1 UDP-glucose flavonoid 3-O-glycosyltransferase 7                                                |
| TCONS_00020680 | #NA | #NA       | #NA       | BGIOSGA022870 | XP_021319674.1 acyl-coenzyme A oxidase 4, peroxisomal isoform X2                                              |
| TCONS_00009782 | #NA | #NA       | #NA       | BGIOSGA022924 | XP_010041882.1 heat shock 70 kDa protein cognate 1-like                                                       |
| TCONS_00003129 | #NA | #NA       | #NA       | BGIOSGA022991 | XP_006645653.1 plastid division protein PDV1-like isoform X1                                                  |
| TCONS_00020265 | #NA | -2.4079   | -3.59086  | BGIOSGA023178 | XP_002436626.1 anthocyanidin 3-O-glycosyltransferase                                                          |
| TCONS_00024958 | #NA | 0.349489  | #NA       | BGIOSGA023410 | XP_003573656.1 protein ROOT INITIATION DEFECTIVE 3 isoform X2                                                 |
| TCONS_00032558 | #NA | -0.34768  | 1.70475   | BGIOSGA023471 | XP_004982612.1 cytochrome P450 89A2                                                                           |
| TCONS_00012870 | #NA | #NA       | #NA       | BGIOSGA023620 | XP_003561528.1 alpha-amylase/trypsin inhibitor XP_006655890.1 PREDICTED: uncharacterized protein LOC102709653 |
| TCONS_00020303 | #NA | 0.600306  | -0.574575 | BGIOSGA023713 | XP_015688641.1 rapid alkalization factor-like                                                                 |
| TCONS_00006618 | #NA | -1.96591  | -1.53234  | BGIOSGA023816 | XP_006653972.1 probable histone H2A.6                                                                         |
| TCONS_00017005 | #NA | -3.20265  | -2.78778  | BGIOSGA023949 | XP_006657832.1 F-box protein At1g61340-like                                                                   |
| TCONS_00025340 | #NA | #NA       | #NA       | BGIOSGA024088 | NP_001150785.1 UBIQUITIN family member                                                                        |
| TCONS_00029136 | #NA | #NA       | #NA       | BGIOSGA024290 | XP_021302624.1 subtilisin-chymotrypsin inhibitor-2B                                                           |
| TCONS_00037110 | #NA | #NA       | #NA       | BGIOSGA024358 | XP_006645059.1 ferredoxin, root R-B1-like                                                                     |
| TCONS_00002207 | #NA | #NA       | #NA       | BGIOSGA024517 | XP_015694564.1 seed allergenic protein RAG2-like                                                              |
| TCONS_00024769 | #NA | #NA       | -2.29675  | BGIOSGA024611 | XP_006650748.1 CLAVATA3/ESR (CLE)-related protein 25-like                                                     |
| TCONS_00013364 | #NA | #NA       | #NA       | BGIOSGA024672 | XP_006645800.1 universal stress protein A-like protein                                                        |
| TCONS_00000741 | #NA | -0.787125 | 0.979673  | BGIOSGA024778 | XP_015691808.1 transcription factor PIF1-like                                                                 |
| TCONS_00014953 | #NA | -2.39709  | -1.98423  | BGIOSGA025137 | XP_015697873.1 glutaredoxin-C10                                                                               |
| TCONS_00033953 | #NA | #NA       | #NA       | BGIOSGA025157 | XP_006643914.1 probable F-box protein At3g61730                                                               |
| TCONS_00016232 | #NA | -0.661898 | 0.234473  | BGIOSGA025162 | XP_021317503.1 ADP-ribosylation factor-like protein 2 isoform X3                                              |
| TCONS_00001145 | #NA | 0.0866508 | #NA       | BGIOSGA025403 | XP_012703506.1 putative receptor-like protein kinase At4g00960 isoform X1                                     |
| TCONS_00011189 | #NA | -1.36706  | #NA       | BGIOSGA025416 | XP_015693980.1 PREDICTED: uncharacterized protein LOC102717166                                                |
| TCONS_00020354 | #NA | 1.20651   | -0.941512 | BGIOSGA025561 | XP_022684081.1 protein PYRICULARIA ORYZAE RESISTANCE 21                                                       |
| TCONS_00015818 | #NA | #NA       | 0.0157661 | BGIOSGA025841 | XP_006657932.1 PREDICTED: uncharacterized protein LOC102705450                                                |
| TCONS_00024058 | #NA | #NA       | #NA       | BGIOSGA026093 | XP_015697551.1 regulatory protein NPR5-like                                                                   |
| TCONS_00035546 | #NA | -0.371325 | #NA       | BGIOSGA026395 | XP_002443883.1 uncharacterized protein LOC8076594                                                             |
| TCONS_00025939 | #NA | #NA       | #NA       | BGIOSGA026659 | NP_001318154.1 uncharacterized LOC100274911 precursor                                                         |
| TCONS_00032566 | #NA | #NA       | 1.39806   | BGIOSGA027376 | XP_006659850.1 PREDICTED: uncharacterized protein LOC102700454 isoform X1                                     |
| TCONS_00012098 | #NA | -1.96394  | #NA       | BGIOSGA027623 | XP_006659031.1 PREDICTED: uncharacterized protein LOC102709862                                                |
| TCONS_00035444 | #NA | #NA       | #NA       | BGIOSGA027787 | XP_006645169.1 50S ribosomal protein L13                                                                      |
| TCONS_00002338 | #NA | #NA       | #NA       | BGIOSGA028032 | XP_006651330.1 PREDICTED: uncharacterized protein LOC102708139                                                |
| TCONS_00012172 | #NA | #NA       | #NA       | BGIOSGA028055 | XP_006659959.1 endo-1,3;1,4-beta-D-glucanase-like                                                             |
| TCONS_00039374 | #NA | #NA       | 0.056054  | BGIOSGA028249 | XP_006657763.1 glutathione S-transferase T2-like                                                              |
| TCONS_00037329 | #NA | #NA       | -0.88319  | BGIOSGA028599 | XP_015695543.1 preprotein translocase subunit SECY, chloroplastic                                             |
| TCONS_00026233 | #NA | #NA       | #NA       | BGIOSGA028831 | XP_006661574.1 late histone H2B.L4-like                                                                       |
| TCONS_00030567 | #NA | -3.20502  | -1.79281  | BGIOSGA028893 | XP_004979327.1 cilium- and flagella-associated protein 91                                                     |
| TCONS_00034914 | #NA | #NA       | #NA       | BGIOSGA029105 | XP_006644365.1 ervatamin-B-like                                                                               |
| TCONS_00003976 | #NA | 1.06144   | -2.70663  | BGIOSGA029174 | XP_008377114.1 F-box protein SKIP23-like                                                                      |
| TCONS_00030544 | #NA | -4.49664  | #NA       | BGIOSGA029255 | XP_021307877.1 probable disease resistance RPP8-like protein 4 isoform X2                                     |
| TCONS_00029842 | #NA | -0.364081 | 1.08942   | BGIOSGA029481 | XP_015688373.1 pectinesterase-like                                                                            |
| TCONS_00000768 | #NA | #NA       | -4.96568  | BGIOSGA029702 | XP_015696355.1 WAT1-related protein At4g30420-like                                                            |
| TCONS_00030076 | #NA | #NA       | #NA       | BGIOSGA029729 | XP_006660642.1 keratin-associated protein 6-2-like                                                            |
| TCONS_00030072 | #NA | #NA       | #NA       | BGIOSGA029735 | XP_022683303.1 F-box/kelch-repeat protein At1g51550 isoform X2                                                |
| TCONS_00027601 | #NA | -0.062019 | -1.95446  | BGIOSGA029759 | XP_006655995.1 heat shock factor-binding protein 1                                                            |
| TCONS_00020509 | #NA | 0.384386  | -1.47383  | BGIOSGA029873 | XP_021309370.1 uncharacterized protein LOC8071882 isoform X1                                                  |
| TCONS_00029787 | #NA | #NA       | #NA       | BGIOSGA030027 |                                                                                                               |



transcriptome

|                |     |           |           |               |                                                                            |
|----------------|-----|-----------|-----------|---------------|----------------------------------------------------------------------------|
| TCONS_00028658 | #NA | #NA       | 0.136151  | BGIOSGA030107 | XP_008643645.1cation cation antiporter isoform X1                          |
| TCONS_00026190 | #NA | #NA       | #NA       | BGIOSGA030438 | XP_015694103.1PREDICTED: uncharacterized protein LOC102712736              |
| TCONS_00000916 | #NA | #NA       | -1.51218  | BGIOSGA030495 | XP_002460752.1ribosomal RNA small subunit methyltransferase, mitochondrial |
| TCONS_00017066 | #NA | #NA       | #NA       | BGIOSGA030622 | XP_006654003.1 ocs element-binding factor 1-like                           |
| TCONS_00005712 | #NA | -1.38472  | #NA       | BGIOSGA030667 | XP_008645617.1uncharacterized protein LOC103627060                         |
| TCONS_00012922 | #NA | #NA       | #NA       | BGIOSGA030941 | XP_002464088.2uncharacterized protein LOC8054182                           |
| TCONS_00032659 | #NA | #NA       | #NA       | BGIOSGA031170 | XP_015697608.1 probable sucrose-phosphate synthase 5                       |
| TCONS_00032584 | #NA | #NA       | -1.58737  | BGIOSGA031528 | XP_023157500.1uncharacterized protein LOC103639870                         |
| TCONS_00032585 | #NA | #NA       | #NA       | BGIOSGA031529 | XP_023157500.1uncharacterized protein LOC103639870                         |
| TCONS_00037736 | #NA | #NA       | #NA       | BGIOSGA031563 | XP_006649811.1 SH3 domain-containing protein 2-like                        |
| TCONS_00032515 | #NA | 1.24093   | 1.12602   | BGIOSGA031607 | XP_024312167.1uncharacterized protein LOC112269525                         |
| TCONS_00018003 | #NA | #NA       | -0.793947 | BGIOSGA031738 | XP_002458689.1RING-H2 finger protein ATL74                                 |
| TCONS_00032813 | #NA | 0.204969  | -0.945118 | BGIOSGA032181 | XP_002441676.1protein NUCLEAR FUSION DEFECTIVE 4                           |
| TCONS_00030454 | #NA | -1.97041  | -1.54297  | BGIOSGA032856 | XP_006660914.1PREDICTED: uncharacterized protein LOC102706404              |
| TCONS_00028021 | #NA | -2.56984  | #NA       | BGIOSGA033007 | XP_012829844.1 low affinity sulfate transporter 3-like                     |
| TCONS_00034983 | #NA | #NA       | #NA       | BGIOSGA033867 | XP_004979396.1uncharacterized protein LOC101762125                         |
| TCONS_00034892 | #NA | #NA       | #NA       | BGIOSGA033972 | XP_006663461.1 putative disease resistance RPP13-like protein 1            |
| TCONS_00036552 | #NA | -0.639785 | -2.52257  | BGIOSGA034621 | XP_010238806.1protein HESO1 isoform X3                                     |
| TCONS_00027935 | #NA | #NA       | #NA       | BGIOSGA034696 | XP_006659354.1PREDICTED: uncharacterized protein LOC102715602              |
| TCONS_00032881 | #NA | 0.188984  | -1.98189  | BGIOSGA034704 | XP_004980118.1calcium uniporter protein 6, mitochondrial                   |
| TCONS_00007536 | #NA | #NA       | -0.516979 | BGIOSGA034759 | XP_020393304.1uncharacterized protein LOC103626837                         |
| TCONS_00033019 | #NA | #NA       | 0.208561  | BGIOSGA035266 | XP_015697813.1 pentatricopeptide repeat-containing protein At5g04780-like  |
| TCONS_00029128 | #NA | -2.96968  | -0.956272 | BGIOSGA035307 | XP_015696627.1 protein HVA22-like                                          |
| TCONS_00033521 | #NA | 2.13741   | -0.374706 | BGIOSGA035313 | XP_006662953.1PREDICTED: uncharacterized protein LOC102719904              |
| TCONS_00034687 | #NA | #NA       | #NA       | BGIOSGA035453 | XP_021319183.1achilleol B synthase                                         |
| TCONS_00033914 | #NA | 0.685931  | #NA       | BGIOSGA035607 | XP_006663072.1 protein FRA10AC1                                            |
| TCONS_00036271 | #NA | #NA       | #NA       | BGIOSGA035740 | XP_004962696.1metallothionein-like protein 4B                              |
| TCONS_00037389 | #NA | #NA       | #NA       | BGIOSGA035740 | XP_004962696.1metallothionein-like protein 4B                              |
| TCONS_00031335 | #NA | -1.91256  | #NA       | BGIOSGA035824 | XP_006661869.1 flotillin-like protein 1                                    |
| TCONS_00032810 | #NA | #NA       | #NA       | BGIOSGA035894 | XP_015697537.1PREDICTED: uncharacterized protein LOC102708191              |
| TCONS_00015783 | #NA | -2.70379  | #NA       | BGIOSGA035925 | XP_014753939.1uncharacterized protein LOC100821692                         |
| TCONS_00011578 | #NA | #NA       | #NA       | BGIOSGA036100 | XP_010231566.1uncharacterized protein LOC104582712                         |
| TCONS_00035329 | #NA | -0.818268 | -2.99669  | BGIOSGA036307 | XP_006664925.2PREDICTED: uncharacterized protein LOC102700112              |
| TCONS_00035871 | #NA | #NA       | #NA       | BGIOSGA036362 | XP_021321913.1uncharacterized protein LOC8074247                           |
| TCONS_00032743 | #NA | -2.97306  | #NA       | BGIOSGA036648 | XP_015697878.1 DTW domain-containing protein 2-like                        |
| TCONS_00035670 | #NA | -3.85418  | -2.43868  | BGIOSGA036689 | XP_015698573.1 putative receptor protein kinase ZmPK1                      |
| TCONS_00030351 | #NA | -0.661253 | -1.57155  | BGIOSGA036908 | XP_021306199.1uncharacterized protein LOC110431415                         |
| TCONS_00004325 | #NA | #NA       | #NA       | BGIOSGA036952 | XP_022684315.1F-box/kelch-repeat protein At5g26960                         |
| TCONS_00006189 | #NA | #NA       | 1.10074   | BGIOSGA037000 | XP_021314645.1protein LITTLE ZIPPER 4                                      |
| TCONS_00035650 | #NA | -0.127044 | 0.294215  | BGIOSGA037071 | XP_010238673.1uncharacterized protein LOC104584774                         |
| TCONS_00028135 | #NA | #NA       | -0.860259 | BGIOSGA037193 | XP_015695307.1 endo-1,4-beta-xylanase A-like                               |
| TCONS_00033355 | #NA | #NA       | #NA       | BGIOSGA037198 | XP_011083873.1adenylate kinase 4                                           |
| TCONS_00019788 | #NA | #NA       | -3.46409  | BGIOSGA037417 | XP_006655585.1 gibberellin 2-beta-dioxygenase-like                         |
| TCONS_00035146 | #NA | #NA       | #NA       | BGIOSGA037419 | XP_006663032.1 40S ribosomal protein S9-2-like                             |
| TCONS_00010689 | #NA | #NA       | -1.39304  | BGIOSGA037861 | XP_006651682.1 POU domain, class 3, transcription factor 3-like            |
| TCONS_00025154 | #NA | -0.358227 | 3.42267   | BGIOSGA038142 | XP_022685469.1uncharacterized protein LOC101776219                         |
| TCONS_00031454 | #NA | -1.72128  | 0.011091  | BGIOSGA040211 | XP_015697051.1 cytochrome P450 89A2-like                                   |
| TCONS_00012681 | #NA | -2.57161  | 1.42142   | BGIOSGA040718 | XP_014660901.1uncharacterized protein LOC101772603, partial                |
| TCONS_00006760 | #NA | #NA       | #NA       | #NA           | #NA                                                                        |
| TCONS_00007490 | #NA | #NA       | #NA       | #NA           | #NA                                                                        |
| TCONS_00008527 | #NA | #NA       | #NA       | #NA           | #NA                                                                        |
| TCONS_00009818 | #NA | #NA       | #NA       | #NA           | #NA                                                                        |
| TCONS_00010324 | #NA | #NA       | #NA       | #NA           | #NA                                                                        |
| TCONS_00010945 | #NA | #NA       | #NA       | #NA           | #NA                                                                        |
| TCONS_00012989 | #NA | #NA       | #NA       | #NA           | #NA                                                                        |
| TCONS_00013045 | #NA | #NA       | #NA       | #NA           | #NA                                                                        |
| TCONS_00014080 | #NA | #NA       | #NA       | #NA           | #NA                                                                        |
| TCONS_00015514 | #NA | #NA       | #NA       | #NA           | #NA                                                                        |

transcriptome

|                |     |           |     |           |     |
|----------------|-----|-----------|-----|-----------|-----|
| TCONS_00018947 | #NA | #NA       | #NA | #NA       | #NA |
| TCONS_00019502 | #NA | #NA       | #NA | #NA       | #NA |
| TCONS_00019616 | #NA | #NA       | #NA | #NA       | #NA |
| TCONS_00020415 | #NA | #NA       | #NA | #NA       | #NA |
| TCONS_00022155 | #NA | #NA       | #NA | #NA       | #NA |
| TCONS_00024464 | #NA | #NA       | #NA | #NA       | #NA |
| TCONS_00025704 | #NA | #NA       | #NA | #NA       | #NA |
| TCONS_00025937 | #NA | #NA       | #NA | #NA       | #NA |
| TCONS_00027301 | #NA | #NA       | #NA | #NA       | #NA |
| TCONS_00029035 | #NA | #NA       | #NA | #NA       | #NA |
| TCONS_00029235 | #NA | #NA       | #NA | #NA       | #NA |
| TCONS_00029410 | #NA | #NA       | #NA | #NA       | #NA |
| TCONS_00029482 | #NA | #NA       | #NA | #NA       | #NA |
| TCONS_00031370 | #NA | #NA       | #NA | #NA       | #NA |
| TCONS_00035132 | #NA | #NA       | #NA | #NA       | #NA |
| TCONS_00039079 | #NA | #NA       | #NA | #NA       | #NA |
| TCONS_00000627 | #NA | -0.118376 | #NA | -1.27039  | #NA |
| TCONS_00000706 | #NA | 1.25921   | #NA | #NA       | #NA |
| TCONS_00000993 | #NA | -1.97394  | #NA | -1.55124  | #NA |
| TCONS_00000994 | #NA | #NA       | #NA | #NA       | #NA |
| TCONS_00001235 | #NA | #NA       | #NA | #NA       | #NA |
| TCONS_00001554 | #NA | -0.241309 | #NA | #NA       | #NA |
| TCONS_00002032 | #NA | -0.35258  | #NA | #NA       | #NA |
| TCONS_00002180 | #NA | #NA       | #NA | #NA       | #NA |
| TCONS_00002763 | #NA | #NA       | #NA | #NA       | #NA |
| TCONS_00003244 | #NA | #NA       | #NA | #NA       | #NA |
| TCONS_00003273 | #NA | #NA       | #NA | #NA       | #NA |
| TCONS_00003366 | #NA | -1.32839  | #NA | -0.84878  | #NA |
| TCONS_00003610 | #NA | 1.50688   | #NA | #NA       | #NA |
| TCONS_00003743 | #NA | 0.960044  | #NA | 1.09374   | #NA |
| TCONS_00003987 | #NA | -1.35102  | #NA | -0.301113 | #NA |
| TCONS_00004348 | #NA | #NA       | #NA | #NA       | #NA |
| TCONS_00004647 | #NA | 0.0377017 | #NA | #NA       | #NA |
| TCONS_00005146 | #NA | -1.3779   | #NA | #NA       | #NA |
| TCONS_00005496 | #NA | -0.317182 | #NA | #NA       | #NA |
| TCONS_00005498 | #NA | 0.284488  | #NA | 0.192506  | #NA |
| TCONS_00005855 | #NA | -0.337894 | #NA | #NA       | #NA |
| TCONS_00005939 | #NA | -1.35258  | #NA | #NA       | #NA |
| TCONS_00005971 | #NA | #NA       | #NA | #NA       | #NA |
| TCONS_00005978 | #NA | #NA       | #NA | 1.68819   | #NA |
| TCONS_00005982 | #NA | #NA       | #NA | 0.122859  | #NA |
| TCONS_00006950 | #NA | -0.307524 | #NA | #NA       | #NA |
| TCONS_00007214 | #NA | -1.36511  | #NA | #NA       | #NA |
| TCONS_00007917 | #NA | 1.23394   | #NA | 0.113924  | #NA |
| TCONS_00007925 | #NA | #NA       | #NA | 0.197749  | #NA |
| TCONS_00008081 | #NA | 1.09535   | #NA | -1.91058  | #NA |
| TCONS_00008355 | #NA | #NA       | #NA | -1.20814  | #NA |
| TCONS_00008378 | #NA | -0.918292 | #NA | #NA       | #NA |
| TCONS_00009534 | #NA | -1.37132  | #NA | -0.925565 | #NA |
| TCONS_00009596 | #NA | #NA       | #NA | #NA       | #NA |
| TCONS_00011349 | #NA | 1.20266   | #NA | 0.464481  | #NA |
| TCONS_00011373 | #NA | -0.970414 | #NA | -0.542969 | #NA |
| TCONS_00011536 | #NA | -1.37422  | #NA | #NA       | #NA |
| TCONS_00011793 | #NA | #NA       | #NA | #NA       | #NA |
| TCONS_00012058 | #NA | 1.22944   | #NA | 1.10578   | #NA |
| TCONS_00012570 | #NA | #NA       | #NA | #NA       | #NA |
| TCONS_00012708 | #NA | #NA       | #NA | #NA       | #NA |
| TCONS_00012865 | #NA | 1.22944   | #NA | 0.105776  | #NA |
| TCONS_00013790 | #NA | #NA       | #NA | #NA       | #NA |
| TCONS_00014204 | #NA | 0.356015  | #NA | 0.789593  | #NA |
| TCONS_00015182 | #NA | -3.56655  | #NA | -3.15319  | #NA |
| TCONS_00015287 | #NA | #NA       | #NA | #NA       | #NA |
| TCONS_00015297 | #NA | #NA       | #NA | #NA       | #NA |
| TCONS_00015379 | #NA | #NA       | #NA | #NA       | #NA |
| TCONS_00015637 | #NA | -1.34768  | #NA | -0.880211 | #NA |
| TCONS_00016025 | #NA | -0.367061 | #NA | -1.50157  | #NA |
| TCONS_00016421 | #NA | #NA       | #NA | #NA       | #NA |
| TCONS_00016711 | #NA | #NA       | #NA | #NA       | #NA |
| TCONS_00017680 | #NA | #NA       | #NA | 1.09155   | #NA |
| TCONS_00017976 | #NA | #NA       | #NA | #NA       | #NA |
| TCONS_00018329 | #NA | -0.367061 | #NA | #NA       | #NA |
| TCONS_00018601 | #NA | 0.886732  | #NA | 1.36213   | #NA |
| TCONS_00018792 | #NA | 1.30016   | #NA | 1.79917   | #NA |
| TCONS_00018879 | #NA | 0.644477  | #NA | #NA       | #NA |
| TCONS_00019274 | #NA | 1.98403   | #NA | #NA       | #NA |
| TCONS_00019716 | #NA | #NA       | #NA | #NA       | #NA |
| TCONS_00019857 | #NA | -1.94319  | #NA | -1.48422  | #NA |
| TCONS_00020232 | #NA | #NA       | #NA | -0.292178 | #NA |
| TCONS_00020271 | #NA | #NA       | #NA | #NA       | #NA |
| TCONS_00020319 | #NA | #NA       | #NA | #NA       | #NA |
| TCONS_00020719 | #NA | #NA       | #NA | #NA       | #NA |
| TCONS_00020857 | #NA | #NA       | #NA | #NA       | #NA |
| TCONS_00020926 | #NA | -1.36511  | #NA | 0.0873507 | #NA |
| TCONS_00021012 | #NA | 1.23728   | #NA | #NA       | #NA |
| TCONS_00021145 | #NA | -1.37845  | #NA | #NA       | #NA |
| TCONS_00021258 | #NA | #NA       | #NA | #NA       | #NA |

XP\_012572801.1PREDICTED: uncharacterized protein LOC105852328

XP\_002465640.1zinc finger protein 8

transcriptome

|                |     |           |           |      |                                                                         |
|----------------|-----|-----------|-----------|------|-------------------------------------------------------------------------|
| TCONS_00021289 | #NA | #NA       | #NA       | #N/A | #N/A                                                                    |
| TCONS_00021536 | #NA | 0.644477  | 1.10578   | #N/A | #N/A                                                                    |
| TCONS_00022144 | #NA | 0.689146  | 2.1776    | #N/A | #N/A                                                                    |
| TCONS_00022377 | #NA | -1.06787  | -2.17466  | #N/A | #N/A                                                                    |
| TCONS_00022520 | #NA | #NA       | #NA       | #N/A | #N/A                                                                    |
| TCONS_00022760 | #NA | #NA       | -1.53008  | #N/A | #N/A                                                                    |
| TCONS_00022981 | #NA | #NA       | #NA       | #N/A | #N/A                                                                    |
| TCONS_00022991 | #NA | 0.0609562 | #NA       | #N/A | #N/A                                                                    |
| TCONS_00022996 | #NA | #NA       | #NA       | #N/A | #N/A                                                                    |
| TCONS_00023004 | #NA | #NA       | #NA       | #N/A | #N/A                                                                    |
| TCONS_00023094 | #NA | #NA       | #NA       | #N/A | #N/A                                                                    |
| TCONS_00023908 | #NA | #NA       | #NA       | #N/A | #N/A                                                                    |
| TCONS_00024423 | #NA | #NA       | #NA       | #N/A | #N/A                                                                    |
| TCONS_00024771 | #NA | #NA       | #NA       | #N/A | #N/A                                                                    |
| TCONS_00025019 | #NA | 0.632022  | #NA       | #N/A | #N/A                                                                    |
| TCONS_00025514 | #NA | #NA       | -0.359086 | #N/A | #N/A                                                                    |
| TCONS_00026350 | #NA | -1.97791  | -2.56026  | #N/A | #N/A                                                                    |
| TCONS_00026400 | #NA | -1.91072  | -3.01463  | #N/A | #N/A                                                                    |
| TCONS_00026644 | #NA | -0.785573 | -1.92387  | #N/A | #N/A                                                                    |
| TCONS_00026891 | #NA | #NA       | #NA       | #N/A | #N/A                                                                    |
| TCONS_00027460 | #NA | #NA       | #NA       | #N/A | #N/A                                                                    |
| TCONS_00028948 | #NA | #NA       | #NA       | #N/A | #N/A                                                                    |
| TCONS_00029038 | #NA | -0.340022 | #NA       | #N/A | XP_006661936.1 protein YABBY 3-like                                     |
| TCONS_00029404 | #NA | 0.0499255 | #NA       | #N/A | #N/A                                                                    |
| TCONS_00029418 | #NA | #NA       | #NA       | #N/A | #N/A                                                                    |
| TCONS_00029674 | #NA | -1.94797  | #NA       | #N/A | #N/A                                                                    |
| TCONS_00029806 | #NA | #NA       | -0.856555 | #N/A | #N/A                                                                    |
| TCONS_00030081 | #NA | #NA       | #NA       | #N/A | #N/A                                                                    |
| TCONS_00030321 | #NA | 2.27411   | #NA       | #N/A | #N/A                                                                    |
| TCONS_00031628 | #NA | -0.367061 | #NA       | #N/A | #N/A                                                                    |
| TCONS_00031991 | #NA | 1.24289   | -0.870707 | #N/A | #N/A                                                                    |
| TCONS_00032112 | #NA | -0.233166 | -2.99642  | #N/A | #N/A                                                                    |
| TCONS_00032442 | #NA | -0.330906 | -1.85273  | #N/A | #N/A                                                                    |
| TCONS_00032473 | #NA | -2.38472  | #NA       | #N/A | #N/A                                                                    |
| TCONS_00034351 | #NA | -0.337894 | #NA       | #N/A | #N/A                                                                    |
| TCONS_00035688 | #NA | 1.06432   | 0.341892  | #N/A | #N/A                                                                    |
| TCONS_00035694 | #NA | #NA       | #NA       | #N/A | #N/A                                                                    |
| TCONS_00036095 | #NA | #NA       | #NA       | #N/A | #N/A                                                                    |
| TCONS_00036549 | #NA | -0.307524 | -1.40249  | #N/A | #N/A                                                                    |
| TCONS_00036861 | #NA | #NA       | #NA       | #N/A | #N/A                                                                    |
| TCONS_00036944 | #NA | -0.325753 | #NA       | #N/A | XP_022681873.1probable RNA-dependent RNA polymerase 3                   |
| TCONS_00037041 | #NA | #NA       | #NA       | #N/A | #N/A                                                                    |
| TCONS_00038276 | #NA | -0.378451 | -0.941512 | #N/A | NP_043048.1ATP-dependent Clp protease proteolytic subunit (chloroplast) |

Supplementary Table S3: Table listing the log2 fold change values of differentially expressed miRNAs calculated for the reads in different libraries (P+H-, P+H+ and P-H+) with respect to control non-primed plants (P-H-).

| P <sup>+</sup> H <sup>-</sup> vs P <sup>+</sup> H <sup>+</sup> |                                           |                                           |                     | P <sup>+</sup> H <sup>+</sup> vs P <sup>-</sup> H <sup>+</sup> |                                           |                                             |                     | P <sup>-</sup> H <sup>+</sup> vs P <sup>-</sup> H <sup>-</sup> |                                           |                                           |                     |
|----------------------------------------------------------------|-------------------------------------------|-------------------------------------------|---------------------|----------------------------------------------------------------|-------------------------------------------|---------------------------------------------|---------------------|----------------------------------------------------------------|-------------------------------------------|-------------------------------------------|---------------------|
| id                                                             | baseMean<br>P <sup>+</sup> H <sup>-</sup> | baseMean<br>P <sup>+</sup> H <sup>+</sup> | log2 Fold<br>Change | id                                                             | baseMean<br>P <sup>+</sup> H <sup>-</sup> | baseMean<br>n P <sup>+</sup> H <sup>+</sup> | log2 Fold<br>Change | id                                                             | baseMean<br>P <sup>-</sup> H <sup>+</sup> | baseMean<br>P <sup>-</sup> H <sup>+</sup> | log2 Fold<br>Change |
| osa-mir2055                                                    | 7.204                                     | 1.249                                     | -2.528              | osa-mir159a                                                    | 5486.997                                  | 3.966                                       | -10.434             | osa-mir1423-5p                                                 | 34.686                                    | 24.736                                    | -0.488              |
| osa-mir530-3p                                                  | 10.406                                    | 1.249                                     | -3.058              | osa-mir1850                                                    | 5.042                                     | 0.992                                       | -2.346              | osa-mir1425-3p                                                 | 47.299                                    | 41.861                                    | -0.176              |
| osa-mir166k-5p                                                 | 14.408                                    | 2.499                                     | -2.528              | osa-mir1863b                                                   | 5.042                                     | 0.992                                       | -2.346              | osa-mir1425-5p                                                 | 15382.660                                 | 15574.351                                 | 0.018               |
| osa-mir5143a                                                   | 2.401                                     | 11.244                                    | 2.227               | osa-mir1879                                                    | 4.034                                     | 0.992                                       | -2.024              | osa-mir1432-3p                                                 | 3.153                                     | 1.903                                     | -0.729              |
| osa-mir1320-5p                                                 | 0.800                                     | 1.249                                     | 0.642               | osa-mir11342-5p                                                | 2.017                                     | 0.000                                       | NA                  | osa-mir1432-5p                                                 | 280.640                                   | 196.939                                   | -0.511              |
| osa-mir169i-3p                                                 | 1.601                                     | 3.748                                     | 1.227               | osa-mir1436                                                    | 1.008                                     | 0.000                                       | NA                  | osa-mir156b-3p                                                 | 42.043                                    | 52.327                                    | 0.316               |
| osa-mir1868                                                    | 0.800                                     | 2.499                                     | 1.642               | osa-mir156a                                                    | 3366.219                                  | 0.000                                       | NA                  | osa-mir156f-3p                                                 | 322.684                                   | 336.794                                   | 0.062               |
| osa-mir2118e                                                   | 0.800                                     | 2.499                                     | 1.642               | osa-mir156c-3p                                                 | 171.437                                   | 0.000                                       | NA                  | osa-mir156j-3p                                                 | 24.175                                    | 43.764                                    | 0.856               |
| osa-mir2863a                                                   | 0.800                                     | 1.249                                     | 0.642               | osa-mir160a-3p                                                 | 14.118                                    | 0.000                                       | NA                  | osa-mir159f                                                    | 5.255                                     | 5.708                                     | 0.119               |
| osa-mir2869                                                    | 0.800                                     | 2.499                                     | 1.642               | osa-mir160a-5p                                                 | 1215.187                                  | 0.000                                       | NA                  | osa-mir162b                                                    | 68.321                                    | 65.646                                    | -0.058              |
| osa-mir2878-3p                                                 | 0.800                                     | 2.499                                     | 1.642               | osa-mir160e-5p                                                 | 347.917                                   | 0.000                                       | NA                  | osa-mir166c-5p                                                 | 1.051                                     | 0.951                                     | -0.144              |
| osa-mir437                                                     | 2.401                                     | 3.748                                     | 0.642               | osa-mir160f-5p                                                 | 410.441                                   | 0.000                                       | NA                  | osa-mir166e-3p                                                 | 5.255                                     | 0.951                                     | -2.466              |
| osa-mir5512a                                                   | 0.800                                     | 1.249                                     | 0.642               | osa-mir162a                                                    | 448.762                                   | 0.000                                       | NA                  | osa-mir166i-3p                                                 | 1.051                                     | 0.951                                     | -0.144              |
| osa-mir812v                                                    | 1.601                                     | 2.499                                     | 0.642               | osa-mir164a                                                    | 522.379                                   | 0.000                                       | NA                  | osa-mir166i-5p                                                 | 6.307                                     | 11.417                                    | 0.856               |
| osa-mir2121a                                                   | 1.601                                     | 3.748                                     | 1.227               | osa-mir164d                                                    | 22.186                                    | 0.000                                       | NA                  | osa-mir166j-5p                                                 | 907.088                                   | 151.272                                   | -2.584              |
| osa-mir2876-3p                                                 | 1.601                                     | 2.499                                     | 0.642               | osa-mir166a-3p                                                 | 39217.761                                 | 0.000                                       | NA                  | osa-mir166k-3p                                                 | 18.920                                    | 4.757                                     | -1.992              |
| osa-mir440                                                     | 7.204                                     | 6.246                                     | -0.206              | osa-mir166a-5p                                                 | 26.220                                    | 0.000                                       | NA                  | osa-mir167e-5p                                                 | 88.291                                    | 66.598                                    | -0.407              |
| osa-mir5082                                                    | 28.816                                    | 23.736                                    | -0.280              | osa-mir166b-5p                                                 | 26.220                                    | 0.000                                       | NA                  | osa-mir167h-3p                                                 | 517.135                                   | 172.203                                   | -1.586              |
| osa-mir812f                                                    | 1.601                                     | 2.499                                     | 0.642               | osa-mir166c-5p                                                 | 1.008                                     | 0.000                                       | NA                  | osa-mir1846a-3p                                                | 17.868                                    | 11.417                                    | -0.646              |
| osa-mir1432-3p                                                 | 2.401                                     | 1.249                                     | -0.943              | osa-mir166d-5p                                                 | 148.243                                   | 0.000                                       | NA                  | osa-mir1849                                                    | 7.358                                     | 2.854                                     | -1.366              |
| osa-mir1846d-3p                                                | 2.401                                     | 1.249                                     | -0.943              | osa-mir166g-3p                                                 | 1874.716                                  | 0.000                                       | NA                  | osa-mir1856                                                    | 3.153                                     | 1.903                                     | -0.729              |
| osa-mir1856                                                    | 2.401                                     | 1.249                                     | -0.943              | osa-mir166h-5p                                                 | 46.389                                    | 0.000                                       | NA                  | osa-mir1860-3p                                                 | 4.204                                     | 4.757                                     | 0.178               |
| osa-mir1863c                                                   | 2.401                                     | 1.249                                     | -0.943              | osa-mir166i-3p                                                 | 1.008                                     | 0.000                                       | NA                  | osa-mir1862a                                                   | 80.934                                    | 73.257                                    | -0.144              |
| osa-mir2863c                                                   | 6.404                                     | 6.246                                     | -0.036              | osa-mir166k-3p                                                 | 2257.928                                  | 0.000                                       | NA                  | osa-mir1862d                                                   | 1452.602                                  | 1747.714                                  | 0.267               |
| osa-mir2873b                                                   | 2.401                                     | 6.246                                     | 1.379               | osa-mir166m                                                    | 128.074                                   | 0.000                                       | NA                  | osa-mir1862e                                                   | 60.963                                    | 47.570                                    | -0.358              |
| osa-mir5802                                                    | 2.401                                     | 3.748                                     | 0.642               | osa-mir167a-5p                                                 | 95.803                                    | 0.000                                       | NA                  | osa-mir1863a                                                   | 7.358                                     | 7.611                                     | 0.049               |
| osa-mir812g                                                    | 2.401                                     | 3.748                                     | 0.642               | osa-mir167c-3p                                                 | 3.025                                     | 0.000                                       | NA                  | osa-mir1863b                                                   | 5.255                                     | 2.854                                     | -0.881              |
| osa-mir812n-3p                                                 | 4.002                                     | 4.997                                     | 0.320               | osa-mir167d-3p                                                 | 14.118                                    | 0.000                                       | NA                  | osa-mir1863c                                                   | 3.153                                     | 1.903                                     | -0.729              |
| osa-mir1860-3p                                                 | 3.202                                     | 2.499                                     | -0.358              | osa-mir167d-5p                                                 | 713.985                                   | 0.000                                       | NA                  | osa-mir1870-3p                                                 | 6.307                                     | 9.514                                     | 0.593               |
| osa-mir3982-3p                                                 | 3.202                                     | 1.249                                     | -1.358              | osa-mir168a-3p                                                 | 582.886                                   | 0.000                                       | NA                  | osa-mir1870-5p                                                 | 8.409                                     | 7.611                                     | -0.144              |
| osa-mir444a-5p                                                 | 3.202                                     | 11.244                                    | 1.812               | osa-mir168a-5p                                                 | 15622.967                                 | 0.000                                       | NA                  | osa-mir1871                                                    | 58.861                                    | 66.598                                    | 0.178               |
| osa-mir159f                                                    | 1648.944                                  | 1039.405                                  | -0.666              | osa-mir169a                                                    | 19.161                                    | 0.000                                       | NA                  | osa-mir1876                                                    | 799.877                                   | 776.339                                   | -0.043              |
| osa-mir166e-3p                                                 | 4.002                                     | 2.499                                     | -0.680              | osa-mir169b                                                    | 20.169                                    | 0.000                                       | NA                  | osa-mir1878                                                    | 8.409                                     | 13.320                                    | 0.664               |
| osa-mir1863b                                                   | 4.002                                     | 3.748                                     | -0.095              | osa-mir169h                                                    | 47.397                                    | 0.000                                       | NA                  | osa-mir1879                                                    | 4.204                                     | 2.854                                     | -0.559              |
| osa-mir2874                                                    | 4.002                                     | 4.997                                     | 0.320               | osa-mir169n                                                    | 2.017                                     | 0.000                                       | NA                  | osa-mir1883a                                                   | 37.839                                    | 24.736                                    | -0.613              |
| osa-mir529b                                                    | 4.002                                     | 3.748                                     | -0.095              | osa-mir169-3p                                                  | 1.008                                     | 0.000                                       | NA                  | osa-mir2055                                                    | 9.460                                     | 11.417                                    | 0.271               |
| osa-mir5788                                                    | 4.002                                     | 9.994                                     | 1.320               | osa-mir171b                                                    | 201.691                                   | 0.000                                       | NA                  | osa-mir2121a                                                   | 2.102                                     | 3.806                                     | 0.856               |
| osa-mir166i-5p                                                 | 4.803                                     | 2.499                                     | -0.943              | osa-mir171c-5p                                                 | 1.008                                     | 0.000                                       | NA                  | osa-mir2863a                                                   | 1.051                                     | 3.806                                     | 1.856               |
| osa-mir1870-3p                                                 | 4.803                                     | 9.994                                     | 1.057               | osa-mir172a                                                    | 67.566                                    | 0.000                                       | NA                  | osa-mir2863b                                                   | 8.409                                     | 5.708                                     | -0.559              |
| osa-mir3980a-5p                                                | 4.803                                     | 13.742                                    | 1.517               | osa-mir172d-5p                                                 | 4.034                                     | 0.000                                       | NA                  | osa-mir2871a-3p                                                | 38.890                                    | 41.861                                    | 0.106               |
| osa-mir1849                                                    | 5.603                                     | 9.994                                     | 0.835               | osa-mir1864                                                    | 2.017                                     | 0.000                                       | NA                  | osa-mir2872                                                    | 1.051                                     | 0.951                                     | -0.144              |
| osa-mir1863a                                                   | 5.603                                     | 6.246                                     | 0.157               | osa-mir1872                                                    | 1.008                                     | 0.000                                       | NA                  | osa-mir2873a                                                   | 107.211                                   | 84.674                                    | -0.340              |
| osa-mir2879                                                    | 5.603                                     | 6.246                                     | 0.157               | osa-mir2118b                                                   | 5.042                                     | 0.000                                       | NA                  | osa-mir2873b                                                   | 3.153                                     | 3.806                                     | 0.271               |
| osa-mir5513                                                    | 5.603                                     | 11.244                                    | 1.005               | osa-mir2118e                                                   | 1.008                                     | 0.000                                       | NA                  | osa-mir2874                                                    | 5.255                                     | 8.563                                     | 0.704               |
| osa-mir6251                                                    | 5.603                                     | 4.997                                     | -0.165              | osa-mir2872                                                    | 1.008                                     | 0.000                                       | NA                  | osa-mir2876-3p                                                 | 2.102                                     | 2.854                                     | 0.441               |
| osa-mir1870-5p                                                 | 6.404                                     | 6.246                                     | -0.036              | osa-mir2878-3p                                                 | 1.008                                     | 0.000                                       | NA                  | osa-mir2878-3p                                                 | 1.051                                     | 2.854                                     | 1.441               |
| osa-mir1878                                                    | 18.411                                    | 11.244                                    | -0.711              | osa-mir319a-3p.2-3p                                            | 36.304                                    | 0.000                                       | NA                  | osa-mir2878-5p                                                 | 47.299                                    | 71.355                                    | 0.593               |
| osa-mir2863b                                                   | 6.404                                     | 9.994                                     | 0.642               | osa-mir390-3p                                                  | 3.025                                     | 0.000                                       | NA                  | osa-mir2879                                                    | 7.358                                     | 3.806                                     | -0.951              |
| osa-mir5508                                                    | 6.404                                     | 17.490                                    | 1.450               | osa-mir390-5p                                                  | 79.668                                    | 0.000                                       | NA                  | osa-mir2880                                                    | 153.459                                   | 154.126                                   | 0.006               |
| osa-mir5814                                                    | 9.605                                     | 7.496                                     | -0.358              | osa-mir393a                                                    | 1057.868                                  | 0.000                                       | NA                  | osa-mir396d                                                    | 15.766                                    | 20.931                                    | 0.409               |
| osa-mir396d                                                    | 259.348                                   | 287.335                                   | 0.148               | osa-mir393b-3p                                                 | 782.560                                   | 0.000                                       | NA                  | osa-mir3980a-5p                                                | 6.307                                     | 5.708                                     | -0.144              |
| osa-mir812p                                                    | 12.807                                    | 23.736                                    | 0.890               | osa-mir393b-5p                                                 | 12.101                                    | 0.000                                       | NA                  | osa-mir3982-3p                                                 | 4.204                                     | 0.951                                     | -2.144              |
| osa-mir1846a-3p                                                | 13.608                                    | 9.994                                     | -0.445              | osa-mir394                                                     | 470.948                                   | 0.000                                       | NA                  | osa-mir399k                                                    | 1.051                                     | 0.951                                     | -0.144              |
| osa-mir6249a                                                   | 13.608                                    | 9.994                                     | -0.445              | osa-mir396a-5p                                                 | 39.330                                    | 0.000                                       | NA                  | osa-mir408-5p                                                  | 35.737                                    | 28.542                                    | -0.324              |
| osa-mir156j-3p                                                 | 18.411                                    | 24.986                                    | 0.441               | osa-mir396c-3p                                                 | 1.008                                     | 0.000                                       | NA                  | osa-mir435                                                     | 3.153                                     | 0.951                                     | -1.729              |
| osa-mir5150-5p                                                 | 21.612                                    | 41.226                                    | 0.932               | osa-mir396c-5p                                                 | 993.327                                   | 0.000                                       | NA                  | osa-mir437                                                     | 1.051                                     | 2.854                                     | 1.441               |
| osa-mir812n-5p                                                 | 24.014                                    | 24.986                                    | 0.057               | osa-mir396e-5p                                                 | 52160.258                                 | 0.000                                       | NA                  | osa-mir440                                                     | 2.102                                     | 1.903                                     | -0.144              |
| osa-mir1423-5p                                                 | 31.218                                    | 26.235                                    | -0.251              | osa-mir397a                                                    | 14.118                                    | 0.000                                       | NA                  | osa-mir444a-5p                                                 | 4.204                                     | 5.708                                     | 0.441               |
| osa-mir408-5p                                                  | 27.216                                    | 18.739                                    | -0.538              | osa-mir398b                                                    | 207.741                                   | 0.000                                       | NA                  | osa-mir444f                                                    | 88.291                                    | 104.654                                   | 0.245               |
| osa-mir1883a                                                   | 28.816                                    | 17.490                                    | -0.720              | osa-mir399a                                                    | 1.008                                     | 0.000                                       | NA                  | osa-mir5082                                                    | 2.102                                     | 3.806                                     | 0.856               |
| osa-mir2871a-3p                                                | 29.617                                    | 21.238                                    | -0.480              | osa-mir399d                                                    | 105.888                                   | 0.000                                       | NA                  | osa-mir5083                                                    | 1.051                                     | 1.903                                     | 0.856               |
| osa-mir820a                                                    | 30.417                                    | 24.986                                    | -0.284              | osa-mir399j                                                    | 8.068                                     | 0.000                                       | NA                  | osa-mir5143a                                                   | 3.153                                     | 4.757                                     | 0.593               |
| osa-mir156b-3p                                                 | 32.018                                    | 67.461                                    | 1.075               | osa-mir399k                                                    | 1.008                                     | 0.000                                       | NA                  | osa-mir5144-5p                                                 | 46.248                                    | 34.250                                    | -0.433              |
| osa-mir5144-5p                                                 | 35.220                                    | 19.989                                    | -0.817              | osa-mir408-3p                                                  | 199.674                                   | 0.000                                       | NA                  | osa-mir5150-3p                                                 | 133.488                                   | 189.328                                   | 0.504               |
| osa-mir535-3p                                                  | 35.220                                    | 29.983                                    | -0.232              | osa-mir440                                                     | 2.017                                     | 0.000                                       | NA                  | osa-mir5150-5p                                                 | 28.379                                    | 47.570                                    | 0.745               |
| osa-mir1425-3p                                                 | 36.021                                    | 27.484                                    | -0.390              | osa-mir444a-3p.1                                               | 10.085                                    | 0.000                                       | NA                  | osa-mir528-3p                                                  | 317.428                                   | 97.994                                    | -1.696              |
| osa-mir2878-5p                                                 | 36.021                                    | 66.212                                    | 0.878               | osa-mir444a-3p.2                                               | 592.971                                   | 0.000                                       | NA                  | osa-mir529b                                                    | 5.255                                     | 3.806                                     | -0.466              |
| osa-mir1871                                                    | 44.826                                    | 46.224                                    | 0.044               | osa-mir5083                                                    | 1.008                                     | 0.000                                       | NA                  | osa-mir530-3p                                                  | 13.664                                    | 7.611                                     | -0.844              |
| osa-mir1862e                                                   | 46.427                                    | 37.479                                    | -0.309              | osa-mir528-5p                                                  | 88.744                                    | 0.000                                       | NA                  | osa-mir531a                                                    | 396.260                                   | 239.752                                   | -0.725              |
| osa-mir162b                                                    | 52.030                                    | 43.725                                    | -0.251              | osa-mir530-5p                                                  | 18.152                                    | 0.000                                       | NA                  | osa-mir535-3p                                                  | 46.248                                    | 51.375                                    | 0.152               |
| osa-mir1862a                                                   | 61.635                                    | 88.699                                    | 0.525               | osa-mir535-5p                                                  | 115.972                                   | 0.000                                       | NA                  | osa-mir5508                                                    | 8.409                                     | 14.271                                    | 0.763               |
| osa-mir167e-3p                                                 | 67.238                                    | 36.229                                    | -0.892              | osa-mir5828                                                    | 1.008                                     | 0.000                                       | NA                  | osa-mir5513                                                    | 7.358                                     | 2.854                                     | -1.366              |
| osa-mir444f                                                    | 67.238                                    | 57.467                                    | -0.227              | osa-mir6250                                                    | 1.008                                     | 0.000                                       | NA                  | osa-mir5540                                                    | 3.153                                     | 7.611                                     | 1.271               |
| osa-mir2873a                                                   | 81.647                                    | 83.702                                    | 0.036               | osa-mir827                                                     | 135.133                                   | 0.000                                       | NA                  | osa-mir5788                                                    | 5.255                                     | 9.514                                     | 0.856               |
| osa-mir5150-3p                                                 | 101.658                                   | 117.433                                   | 0.208               | osa-mir11340-3p                                                | 0.000                                     | 1.983                                       | NA                  | osa-mir5794                                                    | 214.422                                   | 268.294                                   | 0.323               |
| osa-mir2880                                                    | 116.867                                   | 81.203                                    | -0.525              | osa-mir1320-3p                                                 | 0.000                                     | 2.975                                       | NA                  | osa-mir5802                                                    | 3.153                                     | 4.757                                     | 0.593               |
| osa-mir5794                                                    | 163.293                                   | 173.651                                   | 0.089               | osa-mir164e                                                    | 0.000                                     | 0.992                                       | NA                  | osa-mir5814                                                    | 12.613                                    | 7.611                                     | -0.729              |
| osa-mir1432-5p                                                 | 213.722                                   | 177.398                                   | -0.269              | osa-mir171d-5p                                                 | 0.000                                     | 1.983                                       | NA                  | osa-mir5825                                                    | 2.102                                     | 0.951                                     | -1.144              |
| osa-mir528-3p                                                  | 241.738                                   | 82.453                                    | -1.552              | osa-mir171i-5p                                                 | 0.000                                     | 0.992                                       | NA                  | osa-mir6249a                                                   | 17.868                                    | 18.077                                    | 0.017               |
| osa-mir156f-3p                                                 | 245.741                                   | 222.373                                   | -0.144              | osa-mir1857-3p                                                 | 0.000                                     | 2.975                                       | NA                  | osa-mir6251                                                    | 7.358                                     | 6.660                                     | -0.144              |

|                     |           |          |        |                 |           |          |        |                     |           |        |        |
|---------------------|-----------|----------|--------|-----------------|-----------|----------|--------|---------------------|-----------|--------|--------|
| osa-mir531a         | 301.773   | 87.450   | -1.787 | osa-mir1860-5p  | 0.000     | 0.992    | NA     | osa-mir7694-5p      | 4.204     | 0.951  | -2.144 |
| osa-mir167h-3p      | 393.825   | 218.625  | -0.849 | osa-mir1861e    | 0.000     | 0.992    | NA     | osa-mir812f         | 2.102     | 6.660  | 1.664  |
| osa-mir1876         | 609.149   | 663.370  | 0.123  | osa-mir2275d    | 0.000     | 0.992    | NA     | osa-mir812g         | 3.153     | 4.757  | 0.593  |
| osa-mir166j-5p      | 690.795   | 223.622  | -1.627 | osa-mir2866     | 0.000     | 1.983    | NA     | osa-mir812n-3p      | 3.153     | 3.806  | 0.271  |
| osa-mir1862d        | 1106.233  | 1436.677 | 0.377  | osa-mir2870     | 0.000     | 0.992    | NA     | osa-mir812n-5p      | 31.533    | 31.396 | -0.006 |
| osa-mir1425-5p      | 11714.706 | 9123.524 | -0.361 | osa-mir397b     | 0.000     | 0.992    | NA     | osa-mir812p         | 16.817    | 20.931 | 0.316  |
| osa-mir11344-5p     | 1.000     | 0.000    | NA     | osa-mir3981-3p  | 0.000     | 0.992    | NA     | osa-mir812v         | 1.051     | 1.903  | 0.856  |
| osa-mir1436         | 1.000     | 0.000    | NA     | osa-mir5147     | 0.000     | 0.992    | NA     | osa-mir820a         | 39.941    | 39.007 | -0.034 |
| osa-mir166c-5p      | 1.000     | 0.000    | NA     | osa-mir5152-3p  | 0.000     | 0.992    | NA     | osa-mir11342-5p     | 2.102     | 0.000  | NA     |
| osa-mir166i-3p      | 1.000     | 0.000    | NA     | osa-mir5160     | 0.000     | 2.975    | NA     | osa-mir11344-5p     | 1.051     | 0.000  | NA     |
| osa-mir169r-3p      | 1.000     | 0.000    | NA     | osa-mir5339     | 0.000     | 0.992    | NA     | osa-mir1320-5p      | 1.051     | 0.000  | NA     |
| osa-mir171c-5p      | 1.000     | 0.000    | NA     | osa-mir5801c-5p | 0.000     | 0.992    | NA     | osa-mir1436         | 1.051     | 0.000  | NA     |
| osa-mir1872         | 1.000     | 0.000    | NA     | osa-mir5816     | 0.000     | 0.992    | NA     | osa-mir156a         | 3508.529  | 0.000  | NA     |
| osa-mir2872         | 1.000     | 0.000    | NA     | osa-mir6245b-5p | 0.000     | 0.992    | NA     | osa-mir156c-3p      | 178.685   | 0.000  | NA     |
| osa-mir396c-3p      | 2.000     | 0.000    | NA     | osa-mir6254     | 0.000     | 0.992    | NA     | osa-mir159a         | 5718.965  | 0.000  | NA     |
| osa-mir399a         | 1.000     | 0.000    | NA     | osa-mir810a     | 0.000     | 0.992    | NA     | osa-mir160a-3p      | 14.715    | 0.000  | NA     |
| osa-mir399k         | 1.000     | 0.000    | NA     | osa-mir1320-5p  | 1.008     | 4.958    | 2.298  | osa-mir160a-5p      | 1266.560  | 0.000  | NA     |
| osa-mir5083         | 1.000     | 0.000    | NA     | osa-mir11344-5p | 1.008     | 1.983    | 0.976  | osa-mir160e-5p      | 362.625   | 0.000  | NA     |
| osa-mir5828         | 1.000     | 0.000    | NA     | osa-mir1423-5p  | 33.279    | 86.271   | 1.374  | osa-mir160f-5p      | 427.792   | 0.000  | NA     |
| osa-mir6250         | 1.000     | 0.000    | NA     | osa-mir1425-3p  | 45.380    | 40.656   | -0.159 | osa-mir162a         | 467.734   | 0.000  | NA     |
| osa-mir11342-5p     | 2.000     | 0.000    | NA     | osa-mir1425-5p  | 14758.722 | #####    | 1.191  | osa-mir164a         | 544.463   | 0.000  | NA     |
| osa-mir169n         | 2.000     | 0.000    | NA     | osa-mir1432-3p  | 3.025     | 3.966    | 0.391  | osa-mir164d         | 23.124    | 0.000  | NA     |
| osa-mir171e-5p      | 2.000     | 0.000    | NA     | osa-mir1432-5p  | 269.257   | 550.347  | 1.031  | osa-mir166a-3p      | 40875.727 | 0.000  | NA     |
| osa-mir1864         | 2.000     | 0.000    | NA     | osa-mir156b-3p  | 40.338    | 27.765   | -0.539 | osa-mir166a-5p      | 27.328    | 0.000  | NA     |
| osa-mir5825         | 2.000     | 0.000    | NA     | osa-mir156f-3p  | 309.595   | 271.703  | -0.188 | osa-mir166b-5p      | 27.328    | 0.000  | NA     |
| osa-mir167c-3p      | 3.000     | 0.000    | NA     | osa-mir156j-3p  | 23.194    | 16.857   | -0.460 | osa-mir166d-5p      | 154.510   | 0.000  | NA     |
| osa-mir390-3p       | 3.000     | 0.000    | NA     | osa-mir159f     | 5.042     | 0.941    | 0.461  | osa-mir166g-3p      | 1953.971  | 0.000  | NA     |
| osa-mir435          | 3.000     | 0.000    | NA     | osa-mir162b     | 65.549    | 89.246   | 0.445  | osa-mir166h-5p      | 48.350    | 0.000  | NA     |
| osa-mir5540         | 3.000     | 0.000    | NA     | osa-mir166e-3p  | 5.042     | 5.950    | 0.239  | osa-mir166k-3p      | 2353.384  | 0.000  | NA     |
| osa-mir172d-5p      | 4.000     | 0.000    | NA     | osa-mir166i-5p  | 6.051     | 2.975    | -1.024 | osa-mir166m         | 133.488   | 0.000  | NA     |
| osa-mir1879         | 4.000     | 0.000    | NA     | osa-mir166j-5p  | 870.296   | 244.929  | -1.829 | osa-mir167a-5p      | 99.853    | 0.000  | NA     |
| osa-mir7694-5p      | 4.000     | 0.000    | NA     | osa-mir166k-5p  | 18.152    | 4.958    | -1.872 | osa-mir167c-3p      | 3.153     | 0.000  | NA     |
| osa-mir2118b        | 5.000     | 0.000    | NA     | osa-mir167e-3p  | 84.710    | 55.531   | -0.609 | osa-mir167d-3p      | 14.715    | 0.000  | NA     |
| osa-mir399j         | 48.000    | 0.000    | NA     | osa-mir167h-3p  | 496.159   | 163.617  | -1.600 | osa-mir167d-5p      | 744.170   | 0.000  | NA     |
| osa-mir444a-3p.1    | 10.000    | 0.000    | NA     | osa-mir169f     | 2.017     | 0.992    | -1.024 | osa-mir168a-3p      | 607.528   | 0.000  | NA     |
| osa-mir393b-5p      | 1049.000  | 0.000    | NA     | osa-mir169i-3p  | 1.008     | 2.975    | 1.561  | osa-mir168a-5p      | 16283.442 | 0.000  | NA     |
| osa-mir160a-3p      | 14.000    | 0.000    | NA     | osa-mir171e-5p  | 2.017     | 1.983    | -0.024 | osa-mir169a         | 19.971    | 0.000  | NA     |
| osa-mir167d-3p      | 14.000    | 0.000    | NA     | osa-mir1846a-3p | 17.144    | 11.899   | -0.527 | osa-mir169b         | 21.022    | 0.000  | NA     |
| osa-mir397a         | 14.000    | 0.000    | NA     | osa-mir1846d-3p | 3.025     | 0.992    | -1.609 | osa-mir169f         | 2.102     | 0.000  | NA     |
| osa-mir530-5p       | 18.000    | 0.000    | NA     | osa-mir1849     | 7.059     | 10.908   | 0.628  | osa-mir169h         | 49.401    | 0.000  | NA     |
| osa-mir169a         | 19.000    | 0.000    | NA     | osa-mir1856     | 3.025     | 0.992    | -1.609 | osa-mir169n         | 2.102     | 0.000  | NA     |
| osa-mir169b         | 20.000    | 0.000    | NA     | osa-mir1860-3p  | 4.034     | 5.950    | 0.561  | osa-mir169r-3p      | 1.051     | 0.000  | NA     |
| osa-mir164d         | 22.000    | 0.000    | NA     | osa-mir1862a    | 77.651    | 97.178   | 0.324  | osa-mir171b         | 210.217   | 0.000  | NA     |
| osa-mir166a-5p      | 26.000    | 0.000    | NA     | osa-mir1862d    | 1393.683  | 1271.253 | -0.133 | osa-mir171c-5p      | 1.051     | 0.000  | NA     |
| osa-mir166b-5p      | 26.000    | 0.000    | NA     | osa-mir1862e    | 58.490    | 50.572   | -0.210 | osa-mir171e-5p      | 2.102     | 0.000  | NA     |
| osa-mir319a-3p.2-3j | 36.000    | 0.000    | NA     | osa-mir1863a    | 7.059     | 6.941    | -0.024 | osa-mir172a         | 70.423    | 0.000  | NA     |
| osa-mir396a-5p      | 90.000    | 0.000    | NA     | osa-mir1863c    | 3.025     | 1.983    | -0.609 | osa-mir172d-5p      | 4.204     | 0.000  | NA     |
| osa-mir166h-5p      | 46.000    | 0.000    | NA     | osa-mir1868     | 1.008     | 2.975    | 1.561  | osa-mir1846d-3p     | 3.153     | 0.000  | NA     |
| osa-mir169h         | 47.000    | 0.000    | NA     | osa-mir1870-3p  | 6.051     | 4.958    | -0.287 | osa-mir1850         | 5.255     | 0.000  | NA     |
| osa-mir172a         | 67.000    | 0.000    | NA     | osa-mir1870-5p  | 8.068     | 6.941    | -0.217 | osa-mir1864         | 2.102     | 0.000  | NA     |
| osa-mir390-5p       | 79.000    | 0.000    | NA     | osa-mir1871     | 56.473    | 62.472   | 0.146  | osa-mir1868         | 1.051     | 0.000  | NA     |
| osa-mir528-5p       | 88.000    | 0.000    | NA     | osa-mir1876     | 767.433   | 690.165  | -0.153 | osa-mir1872         | 1.051     | 0.000  | NA     |
| osa-mir167a-5p      | 95.000    | 0.000    | NA     | osa-mir1878     | 8.068     | 8.925    | 0.146  | osa-mir2118b        | 5.255     | 0.000  | NA     |
| osa-mir399d         | 105.000   | 0.000    | NA     | osa-mir1883a    | 36.304    | 22.807   | -0.671 | osa-mir2863c        | 3.153     | 0.000  | NA     |
| osa-mir535-5p       | 115.000   | 0.000    | NA     | osa-mir2055     | 9.076     | 19.832   | 1.128  | osa-mir2869         | 1.051     | 0.000  | NA     |
| osa-mir166m         | 664.000   | 0.000    | NA     | osa-mir2121a    | 2.017     | 0.992    | -1.024 | osa-mir319a-3p.2-3p | 37.839    | 0.000  | NA     |
| osa-mir827          | 134.000   | 0.000    | NA     | osa-mir2863a    | 1.008     | 1.983    | 0.976  | osa-mir390-3p       | 3.153     | 0.000  | NA     |
| osa-mir166d-5p      | 147.000   | 0.000    | NA     | osa-mir2863b    | 8.068     | 10.908   | 0.435  | osa-mir390-5p       | 83.036    | 0.000  | NA     |
| osa-mir156c-3p      | 170.000   | 0.000    | NA     | osa-mir2863c    | 3.025     | 0.992    | -1.609 | osa-mir393a         | 1102.590  | 0.000  | NA     |
| osa-mir408-3p       | 198.000   | 0.000    | NA     | osa-mir2869     | 1.008     | 1.983    | 0.976  | osa-mir393b-3p      | 815.644   | 0.000  | NA     |
| osa-mir171b         | 200.000   | 0.000    | NA     | osa-mir2871a-3p | 37.313    | 60.489   | 0.697  | osa-mir393b-5p      | 12.613    | 0.000  | NA     |
| osa-mir398b         | 206.000   | 0.000    | NA     | osa-mir2873a    | 102.862   | 142.793  | 0.473  | osa-mir394          | 490.858   | 0.000  | NA     |
| osa-mir160e-5p      | 345.000   | 0.000    | NA     | osa-mir2873b    | 3.025     | 6.941    | 1.198  | osa-mir396a-5p      | 40.992    | 0.000  | NA     |
| osa-mir160f-5p      | 407.000   | 0.000    | NA     | osa-mir2874     | 5.042     | 10.908   | 1.113  | osa-mir396c-3p      | 1.051     | 0.000  | NA     |
| osa-mir162a         | 445.000   | 0.000    | NA     | osa-mir2876-3p  | 2.017     | 4.958    | 1.298  | osa-mir396c-5p      | 1035.321  | 0.000  | NA     |
| osa-mir394          | 467.000   | 0.000    | NA     | osa-mir2878-5p  | 45.380    | 104.120  | 1.198  | osa-mir396e-5p      | 54365.379 | 0.000  | NA     |
| osa-mir164a         | 518.000   | 0.000    | NA     | osa-mir2879     | 7.059     | 3.966    | -0.832 | osa-mir397a         | 14.715    | 0.000  | NA     |
| osa-mir168a-3p      | #####     | 0.000    | NA     | osa-mir2880     | 147.234   | 149.734  | 0.024  | osa-mir398b         | 216.524   | 0.000  | NA     |
| osa-mir444a-3p.2    | 588.000   | 0.000    | NA     | osa-mir396d     | 15.127    | 24.790   | 0.713  | osa-mir399a         | 1.051     | 0.000  | NA     |
| osa-mir167d-5p      | 708.000   | 0.000    | NA     | osa-mir3980a-5p | 6.051     | 20.824   | 1.783  | osa-mir399d         | 110.364   | 0.000  | NA     |
| osa-mir393b-3p      | 776.000   | 0.000    | NA     | osa-mir3982-3p  | 4.034     | 7.933    | 0.976  | osa-mir399j         | 8.409     | 0.000  | NA     |
| osa-mir396c-5p      | 985.000   | 0.000    | NA     | osa-mir408-5p   | 34.287    | 41.648   | 0.281  | osa-mir408-3p       | 208.115   | 0.000  | NA     |
| osa-mir393a         | 1049.000  | 0.000    | NA     | osa-mir435      | 3.025     | 2.975    | -0.024 | osa-mir444a-3p      | 10.511    | 0.000  | NA     |
| osa-mir160a-5p      | 1205.000  | 0.000    | NA     | osa-mir437      | 1.008     | 0.992    | -0.024 | osa-mir444b         | 2568.857  | 0.000  | NA     |
| osa-mir166g-3p      | 1859.000  | 0.000    | NA     | osa-mir444a-5p  | 4.034     | 10.908   | 1.435  | osa-mir444d         | 69.372    | 0.000  | NA     |
| osa-mir166k-3p      | 2239.000  | 0.000    | NA     | osa-mir444b     | 2464.661  | 2271.795 | -0.118 | osa-mir528-5p       | 92.496    | 0.000  | NA     |
| osa-mir156a         | 3338.000  | 0.000    | NA     | osa-mir444d     | 66.558    | 86.271   | 0.374  | osa-mir530-5p       | 18.920    | 0.000  | NA     |
| osa-mir168a-5p      | 15492.000 | 0.000    | NA     | osa-mir444f     | 84.710    | 182.458  | 1.107  | osa-mir535-5p       | 120.875   | 0.000  | NA     |
| osa-mir166a-3p      | 38889.000 | 0.000    | NA     | osa-mir5082     | 2.017     | 1.983    | -0.024 | osa-mir5512a        | 1.051     | 0.000  | NA     |
| osa-mir396e-5p      | 51723.000 | 0.000    | NA     | osa-mir5143a    | 3.025     | 1.983    | -0.609 | osa-mir5828         | 1.051     | 0.000  | NA     |
| osa-mir11339-3p     | 0.000     | 1.000    | NA     | osa-mir5144-5p  | 44.372    | 77.346   | 0.802  | osa-mir6250         | 1.051     | 0.000  | NA     |
| osa-mir169f-2       | 0.000     | 1.000    | NA     | osa-mir5150-3p  | 128.074   | 234.022  | 0.870  | osa-mir810b         | 3.153     | 0.000  | NA     |
| osa-mir1850-1       | 0.000     | 1.000    | NA     | osa-mir5150-5p  | 27.228    | 35.698   | 0.391  | osa-mir827          | 140.846   | 0.000  | NA     |
| osa-mir1874-3p      | 0.000     | 1.000    | NA     | osa-mir528-3p   | 304.553   | 284.594  | -0.098 | osa-mir169i-3p      | 1.051     | 8.563  | 3.026  |
| osa-mir5144-3p      | 0.000     | 1.000    | NA     | osa-mir529b     | 5.042     | 3.966    | -0.346 | osa-mir2118e        | 1.051     | 5.708  | 2.441  |
| osa-mir5801c-5p     | 0.000     | 1.000    | NA     | osa-mir530-3p   | 13.110    | 6.941    | -0.917 | osa-mir11339-3p     | 0.000     | 0.951  | NA     |

|                 |       |         |    |
|-----------------|-------|---------|----|
| osa-mir5813     | 0.000 | 1.000   | NA |
| osa-mir11340-3p | 0.000 | 2.000   | NA |
| osa-mir159a-2   | 0.000 | 14.000  | NA |
| osa-mir1860-5p  | 0.000 | 2.000   | NA |
| osa-mir2275d    | 0.000 | 2.000   | NA |
| osa-mir2866     | 0.000 | 2.000   | NA |
| osa-mir810b-1   | 0.000 | 2.000   | NA |
| osa-mir6254     | 0.000 | 4.000   | NA |
| osa-mir444d-3   | 0.000 | 66.000  | NA |
| osa-mir444b-1   | 0.000 | 895.000 | NA |

|                |         |         |        |
|----------------|---------|---------|--------|
| osa-mir531a    | 380.187 | 226.089 | -0.750 |
| osa-mir535-3p  | 44.372  | 89.246  | 1.008  |
| osa-mir5508    | 8.068   | 14.874  | 0.883  |
| osa-mir5512a   | 1.008   | 0.992   | -0.024 |
| osa-mir5513    | 7.059   | 14.874  | 1.075  |
| osa-mir5540    | 3.025   | 5.950   | 0.976  |
| osa-mir5788    | 5.042   | 4.958   | -0.024 |
| osa-mir5794    | 205.725 | 345.083 | 0.746  |
| osa-mir5802    | 3.025   | 1.983   | -0.609 |
| osa-mir5814    | 12.101  | 10.908  | -0.150 |
| osa-mir5825    | 2.017   | 0.992   | -1.024 |
| osa-mir6249a   | 17.144  | 25.782  | 0.589  |
| osa-mir6251    | 7.059   | 10.908  | 0.628  |
| osa-mir7694-5p | 4.034   | 1.983   | -1.024 |
| osa-mir810b    | 3.025   | 2.975   | -0.024 |
| osa-mir812f    | 2.017   | 0.992   | -1.024 |
| osa-mir812g    | 3.025   | 2.975   | -0.024 |
| osa-mir812n-3p | 3.025   | 1.983   | -0.609 |
| osa-mir812n-5p | 30.254  | 37.681  | 0.317  |
| osa-mir812p    | 16.135  | 40.656  | 1.333  |
| osa-mir812v    | 1.008   | 1.983   | 0.976  |
| osa-mir820a    | 38.321  | 80.321  | 1.068  |

|                  |       |          |    |
|------------------|-------|----------|----|
| osa-mir1320-3p   | 0.000 | 0.951    | NA |
| osa-mir1437a     | 0.000 | 0.951    | NA |
| osa-mir159a-2    | 0.000 | 2.854    | NA |
| osa-mir169f-2    | 0.000 | 5.708    | NA |
| osa-mir169i-5p.2 | 0.000 | 0.951    | NA |
| osa-mir1846d-5p  | 0.000 | 1.903    | NA |
| osa-mir1850-1    | 0.000 | 0.951    | NA |
| osa-mir1860-5p   | 0.000 | 1.903    | NA |
| osa-mir1880      | 0.000 | 2.854    | NA |
| osa-mir2275d     | 0.000 | 1.903    | NA |
| osa-mir2864-1    | 0.000 | 0.951    | NA |
| osa-mir2864-2    | 0.000 | 0.951    | NA |
| osa-mir2870      | 0.000 | 1.903    | NA |
| osa-mir2871b-5p  | 0.000 | 0.951    | NA |
| osa-mir2876-5p   | 0.000 | 0.951    | NA |
| osa-mir396f-3p   | 0.000 | 0.951    | NA |
| osa-mir3979-5p   | 0.000 | 0.951    | NA |
| osa-mir444b-1    | 0.000 | 1575.512 | NA |
| osa-mir444d-3    | 0.000 | 108.459  | NA |
| osa-mir5144-3p   | 0.000 | 1.903    | NA |
| osa-mir5145      | 0.000 | 1.903    | NA |
| osa-mir5157a-3p  | 0.000 | 0.951    | NA |
| osa-mir5160      | 0.000 | 1.903    | NA |
| osa-mir5161      | 0.000 | 0.951    | NA |
| osa-mir5339      | 0.000 | 0.951    | NA |
| osa-mir5493      | 0.000 | 0.951    | NA |
| osa-mir5504      | 0.000 | 0.951    | NA |
| osa-mir5505      | 0.000 | 1.903    | NA |
| osa-mir5510      | 0.000 | 0.951    | NA |
| osa-mir5810      | 0.000 | 0.951    | NA |
| osa-mir5813      | 0.000 | 0.951    | NA |
| osa-mir5815      | 0.000 | 0.951    | NA |
| osa-mir6254      | 0.000 | 0.951    | NA |
| osa-mir810b-1    | 0.000 | 5.708    | NA |

| P <sup>+</sup> H <sup>-</sup> vs P <sup>+</sup> H <sup>-</sup> |                               |                                 |           | P <sup>+</sup> H <sup>-</sup> vs P <sup>+</sup> H <sup>-</sup> |                               |                               |          | P <sup>+</sup> H <sup>-</sup> vs P <sup>+</sup> H <sup>-</sup> |                                |                                 |           |
|----------------------------------------------------------------|-------------------------------|---------------------------------|-----------|----------------------------------------------------------------|-------------------------------|-------------------------------|----------|----------------------------------------------------------------|--------------------------------|---------------------------------|-----------|
| id                                                             | baseMean                      | baseMea                         | log2 Fold | id                                                             | baseMean                      | baseMean                      | log2Fold | id                                                             | baseMean                       | baseMea                         | log2 Fold |
|                                                                | P <sup>+</sup> H <sup>-</sup> | n P <sup>+</sup> H <sup>-</sup> | Change    |                                                                | P <sup>+</sup> H <sup>-</sup> | P <sup>+</sup> H <sup>-</sup> | Change   |                                                                | _P <sup>+</sup> H <sup>-</sup> | n_P <sup>+</sup> H <sup>-</sup> | Change    |
| osa-mir159f                                                    | 1018.988                      | 5.715                           | -7.478    | osa-mir159f                                                    | 1038.528                      | 4.807                         | -7.755   | osa-mir3982-3p                                                 | 8                              | 1                               | -3.000    |
| osa-mir1863b                                                   | 3.674                         | 0.816                           | -2.170    | osa-mir159a-2                                                  | 17.475                        | 2.403                         | -2.862   | osa-mir166e-3p                                                 | 6                              | 1                               | -2.585    |
| osa-mir2121a                                                   | 3.674                         | 0.816                           | -2.170    | osa-mir5082                                                    | 23.716                        | 3.205                         | -2.888   | osa-mir5513                                                    | 15                             | 3                               | -2.322    |
| osa-mir2863c                                                   | 6.124                         | 0.816                           | -2.907    | osa-mir6254                                                    | 4.993                         | 0.801                         | -2.640   | osa-mir166i-5p                                                 | 3                              | 12                              | 2.000     |
| osa-mir396d                                                    | 281.691                       | 20.412                          | -3.787    | osa-mir1849                                                    | 9.986                         | 2.403                         | -2.055   | osa-mir2121a                                                   | 1                              | 4                               | 2.000     |
| osa-mir437                                                     | 3.674                         | 0.816                           | -2.170    | osa-mir5513                                                    | 11.234                        | 2.403                         | -2.225   | osa-mir812f                                                    | 1                              | 7                               | 2.807     |
| osa-mir5082                                                    | 23.270                        | 1.633                           | -3.833    | osa-mir396d                                                    | 287.093                       | 17.625                        | -4.026   | osa-mir1849                                                    | 11                             | 3                               | -1.874    |
| osa-mir5143a                                                   | 11.023                        | 1.633                           | -2.755    | osa-mir2055                                                    | 1.248                         | 9.614                         | 2.945    | osa-mir3980a-5p                                                | 21                             | 6                               | -1.807    |
| osa-mir6254                                                    | 4.899                         | 0.816                           | -2.585    | osa-mir530-3p                                                  | 1.248                         | 6.409                         | 2.360    | osa-mir1423-5p                                                 | 87                             | 26                              | -1.743    |
| osa-mir2055                                                    | 1.225                         | 16.330                          | 3.737     | osa-mir11339-3p                                                | 1.248                         | 0.801                         | -0.640   | osa-mir1320-3p                                                 | 3                              | 1                               | -1.585    |
| osa-mir3982-3p                                                 | 1.225                         | 6.532                           | 2.415     | osa-mir1432-3p                                                 | 1.248                         | 1.602                         | 0.360    | osa-mir435                                                     | 3                              | 1                               | -1.585    |
| osa-mir530-3p                                                  | 1.225                         | 5.715                           | 2.222     | osa-mir169f-2                                                  | 1.248                         | 4.807                         | 1.945    | osa-mir528-3p                                                  | 287                            | 103                             | -1.478    |
| osa-mir11340-3p                                                | 2.449                         | 1.633                           | -0.585    | osa-mir1850-1                                                  | 1.248                         | 0.801                         | -0.640   | osa-mir1432-5p                                                 | 555                            | 207                             | -1.423    |
| osa-mir1320-5p                                                 | 1.225                         | 4.082                           | 1.737     | osa-mir1856                                                    | 1.248                         | 1.602                         | 0.360    | osa-mir5144-5p                                                 | 78                             | 36                              | -1.115    |
| osa-mir1423-5p                                                 | 25.720                        | 71.035                          | 1.466     | osa-mir1863c                                                   | 1.248                         | 1.602                         | 0.360    | osa-mir1425-5p                                                 | 33978                          | 16370                           | -1.054    |
| osa-mir1425-3p                                                 | 26.944                        | 33.476                          | 0.313     | osa-mir2118e                                                   | 2.496                         | 4.807                         | 0.945    | osa-mir1432-3p                                                 | 4                              | 2                               | -1.000    |
| osa-mir1425-5p                                                 | 8944.312                      | #####                           | 1.633     | osa-mir2863a                                                   | 1.248                         | 3.205                         | 1.360    | osa-mir7694-5p                                                 | 2                              | 1                               | -1.000    |
| osa-mir1432-3p                                                 | 1.225                         | 3.266                           | 1.415     | osa-mir3982-3p                                                 | 1.248                         | 0.801                         | -0.640   | osa-mir820a                                                    | 81                             | 41                              | -0.982    |
| osa-mir1432-5p                                                 | 173.914                       | 453.156                         | 1.382     | osa-mir440                                                     | 6.241                         | 1.602                         | -1.962   | osa-mir812p                                                    | 41                             | 22                              | -0.898    |
| osa-mir156b-3p                                                 | 66.136                        | 22.862                          | -1.532    | osa-mir5144-3p                                                 | 1.248                         | 1.602                         | 0.360    | osa-mir2863b                                                   | 11                             | 6                               | -0.874    |
| osa-mir156f-3p                                                 | 218.005                       | 223.720                         | 0.037     | osa-mir5813                                                    | 1.248                         | 0.801                         | -0.640   | osa-mir444a-5p                                                 | 11                             | 6                               | -0.874    |
| osa-mir156j-3p                                                 | 24.495                        | 13.880                          | -0.819    | osa-mir166e-3p                                                 | 2.496                         | 0.801                         | -1.640   | osa-mir2873b                                                   | 7                              | 4                               | -0.807    |
| osa-mir162b                                                    | 42.866                        | 73.485                          | 0.778     | osa-mir166i-5p                                                 | 2.496                         | 9.614                         | 1.945    | osa-mir444f                                                    | 184                            | 110                             | -0.742    |
| osa-mir166e-3p                                                 | 2.449                         | 4.899                           | 1.000     | osa-mir166k-5p                                                 | 2.496                         | 4.006                         | 0.682    | osa-mir2055                                                    | 20                             | 12                              | -0.737    |
| osa-mir166i-5p                                                 | 2.449                         | 2.449                           | 0.000     | osa-mir1860-3p                                                 | 2.496                         | 4.006                         | 0.682    | osa-mir2876-3p                                                 | 5                              | 3                               | -0.737    |
| osa-mir166j-5p                                                 | 219.229                       | 201.675                         | -0.120    | osa-mir1860-5p                                                 | 2.496                         | 1.602                         | -0.640   | osa-mir535-3p                                                  | 90                             | 54                              | -0.737    |
| osa-mir166k-5p                                                 | 2.449                         | 4.082                           | 0.737     | osa-mir2275d                                                   | 2.496                         | 1.602                         | -0.640   | osa-mir2873a                                                   | 144                            | 89                              | -0.694    |
| osa-mir167e-3p                                                 | 35.518                        | 45.724                          | 0.364     | osa-mir2876-3p                                                 | 2.496                         | 2.403                         | -0.055   | osa-mir6251                                                    | 11                             | 7                               | -0.652    |
| osa-mir167h-3p                                                 | 214.330                       | 134.722                         | -0.670    | osa-mir2878-3p                                                 | 2.496                         | 2.403                         | -0.055   | osa-mir166j-5p                                                 | 247                            | 159                             | -0.635    |
| osa-mir169i-3p                                                 | 3.674                         | 2.449                           | -0.585    | osa-mir810b-1                                                  | 2.496                         | 4.807                         | 0.945    | osa-mir5160                                                    | 3                              | 2                               | -0.585    |
| osa-mir1846a-3p                                                | 9.798                         | 9.798                           | 0.000     | osa-mir812f                                                    | 2.496                         | 5.608                         | 1.168    | osa-mir2878-5p                                                 | 105                            | 75                              | -0.485    |
| osa-mir1846d-3p                                                | 1.225                         | 0.816                           | -0.585    | osa-mir812v                                                    | 2.496                         | 1.602                         | -0.640   | osa-mir408-5p                                                  | 42                             | 30                              | -0.485    |
| osa-mir1849                                                    | 9.798                         | 8.981                           | -0.126    | osa-mir169i-3p                                                 | 3.745                         | 7.210                         | 0.945    | osa-mir2871a-3p                                                | 61                             | 44                              | -0.471    |
| osa-mir1856                                                    | 1.225                         | 0.816                           | -0.585    | osa-mir1863b                                                   | 3.745                         | 2.403                         | -0.640   | osa-mir5814                                                    | 11                             | 8                               | -0.459    |
| osa-mir1860-3p                                                 | 2.449                         | 4.899                           | 1.000     | osa-mir2121a                                                   | 3.745                         | 3.205                         | -0.225   | osa-mir6249a                                                   | 26                             | 19                              | -0.453    |
| osa-mir1860-5p                                                 | 2.449                         | 0.816                           | -1.585    | osa-mir437                                                     | 3.745                         | 2.403                         | -0.640   | osa-mir162b                                                    | 90                             | 69                              | -0.383    |
| osa-mir1862a                                                   | 86.957                        | 80.017                          | -0.120    | osa-mir529b                                                    | 3.745                         | 3.205                         | -0.225   | osa-mir1862a                                                   | 98                             | 77                              | -0.348    |
| osa-mir1862d                                                   | 1408.457                      | 1046.749                        | -0.428    | osa-mir5802                                                    | 3.745                         | 4.006                         | 0.097    | osa-mir5794                                                    | 348                            | 282                             | -0.303    |
| osa-mir1862e                                                   | 36.742                        | 41.641                          | 0.181     | osa-mir812g                                                    | 3.745                         | 4.006                         | 0.097    | osa-mir2874                                                    | 11                             | 9                               | -0.290    |
| osa-mir1863a                                                   | 6.124                         | 5.715                           | -0.100    | osa-mir812n-3p                                                 | 4.993                         | 3.205                         | -0.640   | osa-mir1860-3p                                                 | 6                              | 5                               | -0.263    |
| osa-mir1863c                                                   | 1.225                         | 1.633                           | 0.415     | osa-mir1878                                                    | 11.234                        | 11.216                        | -0.002   | osa-mir5150-3p                                                 | 236                            | 199                             | -0.246    |
| osa-mir1868                                                    | 2.449                         | 2.449                           | 0.000     | osa-mir2874                                                    | 4.993                         | 7.210                         | 0.530    | osa-mir159f                                                    | 7                              | 6                               | -0.222    |
| osa-mir1870-3p                                                 | 9.798                         | 4.082                           | -1.263    | osa-mir6251                                                    | 4.993                         | 5.608                         | 0.168    | osa-mir812n-5p                                                 | 38                             | 33                              | -0.204    |
| osa-mir1870-5p                                                 | 6.124                         | 5.715                           | -0.100    | osa-mir1863a                                                   | 6.241                         | 6.409                         | 0.038    | osa-mir396d                                                    | 25                             | 22                              | -0.184    |
| osa-mir1871                                                    | 45.316                        | 51.439                          | 0.183     | osa-mir1870-5p                                                 | 6.241                         | 6.409                         | 0.038    | osa-mir1862e                                                   | 51                             | 50                              | -0.029    |
| osa-mir1876                                                    | 650.340                       | 568.282                         | -0.195    | osa-mir2873b                                                   | 6.241                         | 3.205                         | -0.962   | osa-mir2880                                                    | 151                            | 162                             | 0.101     |
| osa-mir1878                                                    | 11.023                        | 7.348                           | -0.585    | osa-mir2879                                                    | 6.241                         | 3.205                         | -0.962   | osa-mir1425-3p                                                 | 41                             | 44                              | 0.102     |
| osa-mir1883a                                                   | 17.146                        | 18.779                          | 0.131     | osa-mir5814                                                    | 7.489                         | 6.409                         | -0.225   | osa-mir167h-3p                                                 | 165                            | 181                             | 0.134     |
| osa-mir2275d                                                   | 2.449                         | 0.816                           | -1.585    | osa-mir1846a-3p                                                | 9.986                         | 9.614                         | -0.055   | osa-mir531a                                                    | 228                            | 252                             | 0.144     |
| osa-mir2863a                                                   | 1.225                         | 1.633                           | 0.415     | osa-mir1870-3p                                                 | 9.986                         | 8.011                         | -0.318   | osa-mir1871                                                    | 63                             | 70                              | 0.152     |
| osa-mir2863b                                                   | 9.798                         | 8.981                           | -0.126    | osa-mir2863b                                                   | 9.986                         | 4.807                         | -1.055   | osa-mir1883a                                                   | 23                             | 26                              | 0.177     |
| osa-mir2866                                                    | 2.449                         | 1.633                           | -0.585    | osa-mir5788                                                    | 9.986                         | 8.011                         | -0.318   | osa-mir1863a                                                   | 7                              | 8                               | 0.193     |
| osa-mir2869                                                    | 2.449                         | 1.633                           | -0.585    | osa-mir6249a                                                   | 9.986                         | 15.222                        | 0.608    | osa-mir1870-5p                                                 | 7                              | 8                               | 0.193     |
| osa-mir2871a-3p                                                | 20.821                        | 49.806                          | 1.258     | osa-mir444a-5p                                                 | 11.234                        | 4.807                         | -1.225   | osa-mir530-3p                                                  | 7                              | 8                               | 0.193     |
| osa-mir2873a                                                   | 82.058                        | 117.576                         | 0.519     | osa-mir5143a                                                   | 11.234                        | 4.006                         | -1.488   | osa-mir1876                                                    | 696                            | 816                             | 0.229     |
| osa-mir2873b                                                   | 6.124                         | 5.715                           | -0.100    | osa-mir3980a-5p                                                | 13.731                        | 4.807                         | -1.514   | osa-mir167e-3p                                                 | 56                             | 70                              | 0.322     |
| osa-mir2874                                                    | 4.899                         | 8.981                           | 0.874     | osa-mir2871a-3p                                                | 21.220                        | 35.250                        | 0.732    | osa-mir156f-3p                                                 | 274                            | 354                             | 0.370     |
| osa-mir2876-3p                                                 | 2.449                         | 4.082                           | 0.737     | osa-mir1883a                                                   | 17.475                        | 20.829                        | 0.253    | osa-mir5540                                                    | 6                              | 8                               | 0.415     |
| osa-mir2878-5p                                                 | 64.911                        | 85.732                          | 0.401     | osa-mir5508                                                    | 17.475                        | 12.017                        | -0.540   | osa-mir5150-5p                                                 | 36                             | 50                              | 0.474     |
| osa-mir2879                                                    | 6.124                         | 3.266                           | -0.907    | osa-mir408-5p                                                  | 18.723                        | 24.034                        | 0.360    | osa-mir1862d                                                   | 1282                           | 1837                            | 0.519     |
| osa-mir2880                                                    | 79.608                        | 123.291                         | 0.631     | osa-mir5144-5p                                                 | 19.972                        | 28.841                        | 0.530    | osa-mir1878                                                    | 9                              | 14                              | 0.637     |
| osa-mir3980a-5p                                                | 13.472                        | 17.146                          | 0.348     | osa-mir1423-5p                                                 | 26.213                        | 20.829                        | -0.332   | osa-mir812g                                                    | 3                              | 5                               | 0.737     |
| osa-mir408-5p                                                  | 18.371                        | 34.293                          | 0.900     | osa-mir812p                                                    | 23.716                        | 17.625                        | -0.428   | osa-mir156b-3p                                                 | 28                             | 55                              | 0.974     |
| osa-mir444a-5p                                                 | 11.023                        | 8.981                           | -0.295    | osa-mir156j-3p                                                 | 24.965                        | 36.852                        | 0.562    | osa-mir1856                                                    | 1                              | 2                               | 1.000     |
| osa-mir444f                                                    | 56.338                        | 150.235                         | 1.415     | osa-mir812n-5p                                                 | 24.965                        | 26.437                        | 0.083    | osa-mir1860-5p                                                 | 1                              | 2                               | 1.000     |
| osa-mir5144-5p                                                 | 19.596                        | 63.687                          | 1.700     | osa-mir820a                                                    | 24.965                        | 32.847                        | 0.396    | osa-mir1870-3p                                                 | 5                              | 10                              | 1.000     |
| osa-mir5150-3p                                                 | 115.126                       | 192.693                         | 0.743     | osa-mir1425-3p                                                 | 27.461                        | 35.250                        | 0.360    | osa-mir2275d                                                   | 1                              | 2                               | 1.000     |
| osa-mir5150-5p                                                 | 40.417                        | 29.394                          | -0.459    | osa-mir535-3p                                                  | 29.958                        | 43.261                        | 0.530    | osa-mir2863a                                                   | 2                              | 4                               | 1.000     |
| osa-mir528-3p                                                  | 80.833                        | 234.335                         | 1.536     | osa-mir167e-3p                                                 | 36.199                        | 56.079                        | 0.632    | osa-mir2870                                                    | 1                              | 2                               | 1.000     |
| osa-mir529b                                                    | 3.674                         | 3.266                           | -0.170    | osa-mir1862e                                                   | 37.447                        | 40.057                        | 0.097    | osa-mir5082                                                    | 2                              | 4                               | 1.000     |
| osa-mir531a                                                    | 85.732                        | 186.161                         | 1.119     | osa-mir5150-5p                                                 | 41.192                        | 40.057                        | -0.040   | osa-mir5788                                                    | 5                              | 10                              | 1.000     |
| osa-mir535-3p                                                  | 29.394                        | 73.485                          | 1.322     | osa-mir162b                                                    | 43.688                        | 55.278                        | 0.339    | osa-mir812n-3p                                                 | 2                              | 4                               | 1.000     |
| osa-mir5508                                                    | 17.146                        | 12.247                          | -0.485    | osa-mir1871                                                    | 46.185                        | 56.079                        | 0.280    | osa-mir5143a                                                   | 2                              | 5                               | 1.322     |
| osa-mir5512a                                                   | 1.225                         | 0.816                           | -0.585    | osa-mir444f                                                    | 57.419                        | 88.125                        | 0.618    | osa-mir5802                                                    | 2                              | 5                               | 1.322     |
| osa-mir5513                                                    | 11.023                        | 12.247                          | 0.152     | osa-mir2878-5p                                                 | 66.156                        | 60.085                        | -0.139   | osa-mir156j-3p                                                 | 17                             | 46                              | 1.436     |
| osa-mir5788                                                    | 9.798                         | 4.082                           | -1.263    | osa-mir156b-3p                                                 | 67.404                        | 44.062                        | -0.613   | osa-mir169i-3p                                                 | 3                              | 9                               | 1.585     |
| osa-mir5794                                                    | 170.240                       | 284.141                         | 0.739     | osa-mir2880                                                    | 81.135                        | 129.784                       | 0.678    | osa-mir1863b                                                   | 1                              | 3                               | 1.585     |
| osa-mir5801c-5p                                                | 1.225                         | 0.816                           | -0.585    | osa-mir444d-3                                                  | 82.383                        | 91.329                        | 0.149    | osa-mir1879                                                    | 1                              | 3                               | 1.585     |
| osa-mir5802                                                    | 3.674                         | 1.633                           | -1.170    | osa-mir528-3p                                                  | 82.383                        | 82.517                        | 0.002    | osa-mir437                                                     | 1                              | 3                               | 1.585     |
| osa-mir5814                                                    | 7.348                         | 8.981                           | 0.290     | osa-mir2873a                                                   | 83.631                        | 71.301                        | -0.230   | osa-mir11340-3p                                                | 2                              | 0                               | NA        |

|                 |         |          |        |                  |          |           |        |                  |      |      |    |
|-----------------|---------|----------|--------|------------------|----------|-----------|--------|------------------|------|------|----|
| osa-mir6249a    | 9.798   | 21.229   | 1.115  | osa-mir531a      | 87.376   | 201.886   | 1.208  | osa-mir11344-5p  | 2    | 0    | NA |
| osa-mir6251     | 4.899   | 8.981    | 0.874  | osa-mir1862a     | 88.624   | 61.687    | -0.523 | osa-mir1320-5p   | 5    | 0    | NA |
| osa-mir812f     | 2.449   | 0.816    | -1.585 | osa-mir5150-3p   | 117.334  | 159.426   | 0.442  | osa-mir159a      | 4    | 0    | NA |
| osa-mir812g     | 3.674   | 2.449    | -0.585 | osa-mir5794      | 173.504  | 225.920   | 0.381  | osa-mir164e      | 1    | 0    | NA |
| osa-mir812n-3p  | 4.899   | 1.633    | -1.585 | osa-mir1432-5p   | 177.249  | 165.835   | -0.096 | osa-mir169f      | 1    | 0    | NA |
| osa-mir812n-5p  | 24.495  | 31.027   | 0.341  | osa-mir167h-3p   | 218.440  | 145.005   | -0.591 | osa-mir171d-5p   | 2    | 0    | NA |
| osa-mir812p     | 23.270  | 33.476   | 0.525  | osa-mir156f-3p   | 222.185  | 283.602   | 0.352  | osa-mir171e-5p   | 2    | 0    | NA |
| osa-mir812v     | 2.449   | 1.633    | -0.585 | osa-mir166j-5p   | 223.433  | 127.380   | -0.811 | osa-mir171i-5p   | 1    | 0    | NA |
| osa-mir820a     | 24.495  | 66.136   | 1.433  | osa-mir1876      | 662.810  | 653.726   | -0.020 | osa-mir1846d-3p  | 1    | 0    | NA |
| osa-mir11339-3p | 1.000   | 0.000    | NA     | osa-mir444b-1    | 1117.166 | 1326.678  | 0.248  | osa-mir1850      | 1    | 0    | NA |
| osa-mir169f-2   | 1.000   | 0.000    | NA     | osa-mir1862d     | 1435.465 | 1471.684  | 0.036  | osa-mir1857-3p   | 3    | 0    | NA |
| osa-mir1850-1   | 1.000   | 0.000    | NA     | osa-mir1425-5p   | 9115.826 | 13114.568 | 0.525  | osa-mir1861e     | 1    | 0    | NA |
| osa-mir1874-3p  | 1.000   | 0.000    | NA     | osa-mir1320-5p   | 1.000    | 0.000     | NA     | osa-mir1868      | 3    | 0    | NA |
| osa-mir2118e    | 2.000   | 0.000    | NA     | osa-mir1846d-3p  | 1.000    | 0.000     | NA     | osa-mir2863c     | 1    | 0    | NA |
| osa-mir440      | 5.000   | 0.000    | NA     | osa-mir1874-3p   | 1.000    | 0.000     | NA     | osa-mir2866      | 2    | 0    | NA |
| osa-mir5144-3p  | 1.000   | 0.000    | NA     | osa-mir2863c     | 5.000    | 0.000     | NA     | osa-mir2869      | 2    | 0    | NA |
| osa-mir5813     | 1.000   | 0.000    | NA     | osa-mir5512a     | 1.000    | 0.000     | NA     | osa-mir397b      | 1    | 0    | NA |
| osa-mir159a-2   | 14.000  | 0.000    | NA     | osa-mir5801c-5p  | 1.000    | 0.000     | NA     | osa-mir3981-3p   | 1    | 0    | NA |
| osa-mir2878-3p  | 2.000   | 0.000    | NA     | osa-mir11340-3p  | 2.000    | 0.000     | NA     | osa-mir444b      | 2291 | 0    | NA |
| osa-mir810b-1   | 2.000   | 0.000    | NA     | osa-mir1868      | 2.000    | 0.000     | NA     | osa-mir444d      | 87   | 0    | NA |
| osa-mir444d-3   | 66.000  | 0.000    | NA     | osa-mir2866      | 2.000    | 0.000     | NA     | osa-mir5147      | 1    | 0    | NA |
| osa-mir444b-1   | 895.000 | 0.000    | NA     | osa-mir2869      | 2.000    | 0.000     | NA     | osa-mir5152-3p   | 1    | 0    | NA |
| osa-mir11344-5p | 0.000   | 2.000    | NA     | osa-mir1320-3p   | 0.000    | 1.000     | NA     | osa-mir5512a     | 1    | 0    | NA |
| osa-mir1320-3p  | 0.000   | 3.000    | NA     | osa-mir1437a     | 0.000    | 1.000     | NA     | osa-mir5801c-5p  | 1    | 0    | NA |
| osa-mir159a     | 0.000   | 4.000    | NA     | osa-mir166c-5p   | 0.000    | 1.000     | NA     | osa-mir5816      | 1    | 0    | NA |
| osa-mir164e     | 0.000   | 1.000    | NA     | osa-mir166i-3p   | 0.000    | 1.000     | NA     | osa-mir6245b-5p  | 1    | 0    | NA |
| osa-mir169f     | 0.000   | 1.000    | NA     | osa-mir169i-5p.2 | 0.000    | 1.000     | NA     | osa-mir810a      | 1    | 0    | NA |
| osa-mir171d-5p  | 0.000   | 2.000    | NA     | osa-mir1846d-5p  | 0.000    | 2.000     | NA     | osa-mir810b      | 3    | 0    | NA |
| osa-mir171e-5p  | 0.000   | 2.000    | NA     | osa-mir1879      | 0.000    | 3.000     | NA     | osa-mir11339-3p  | 0    | 1    | NA |
| osa-mir171i-5p  | 0.000   | 1.000    | NA     | osa-mir1880      | 0.000    | 3.000     | NA     | osa-mir1437a     | 0    | 1    | NA |
| osa-mir1850     | 0.000   | 1.000    | NA     | osa-mir2864-1    | 0.000    | 1.000     | NA     | osa-mir159a-2    | 0    | 3    | NA |
| osa-mir1857-3p  | 0.000   | 3.000    | NA     | osa-mir2864-2    | 0.000    | 1.000     | NA     | osa-mir166c-5p   | 0    | 1    | NA |
| osa-mir1861e    | 0.000   | 1.000    | NA     | osa-mir2870      | 0.000    | 2.000     | NA     | osa-mir166i-3p   | 0    | 1    | NA |
| osa-mir1879     | 0.000   | 1.000    | NA     | osa-mir2871b-5p  | 0.000    | 1.000     | NA     | osa-mir169f-2    | 0    | 6    | NA |
| osa-mir2870     | 0.000   | 1.000    | NA     | osa-mir2872      | 0.000    | 1.000     | NA     | osa-mir169i-5p.2 | 0    | 1    | NA |
| osa-mir397b     | 0.000   | 1.000    | NA     | osa-mir2876-5p   | 0.000    | 1.000     | NA     | osa-mir1846d-5p  | 0    | 2    | NA |
| osa-mir3981-3p  | 0.000   | 1.000    | NA     | osa-mir396f-3p   | 0.000    | 1.000     | NA     | osa-mir1850-1    | 0    | 1    | NA |
| osa-mir435      | 0.000   | 3.000    | NA     | osa-mir3979-5p   | 0.000    | 1.000     | NA     | osa-mir1880      | 0    | 3    | NA |
| osa-mir444b     | 0.000   | 2291.000 | NA     | osa-mir399k      | 0.000    | 1.000     | NA     | osa-mir2118e     | 0    | 6    | NA |
| osa-mir444d     | 0.000   | 87.000   | NA     | osa-mir435       | 0.000    | 1.000     | NA     | osa-mir2864-1    | 0    | 1    | NA |
| osa-mir5147     | 0.000   | 1.000    | NA     | osa-mir5083      | 0.000    | 2.000     | NA     | osa-mir2864-2    | 0    | 1    | NA |
| osa-mir5152-3p  | 0.000   | 1.000    | NA     | osa-mir5145      | 0.000    | 2.000     | NA     | osa-mir2871b-5p  | 0    | 1    | NA |
| osa-mir5160     | 0.000   | 3.000    | NA     | osa-mir5157a-3p  | 0.000    | 1.000     | NA     | osa-mir2872      | 0    | 1    | NA |
| osa-mir5339     | 0.000   | 1.000    | NA     | osa-mir5160      | 0.000    | 2.000     | NA     | osa-mir2876-5p   | 0    | 1    | NA |
| osa-mir5540     | 0.000   | 6.000    | NA     | osa-mir5161      | 0.000    | 1.000     | NA     | osa-mir2878-3p   | 0    | 3    | NA |
| osa-mir5816     | 0.000   | 1.000    | NA     | osa-mir5339      | 0.000    | 1.000     | NA     | osa-mir396f-3p   | 0    | 1    | NA |
| osa-mir5825     | 0.000   | 1.000    | NA     | osa-mir5493      | 0.000    | 1.000     | NA     | osa-mir3979-5p   | 0    | 1    | NA |
| osa-mir6245b-5p | 0.000   | 1.000    | NA     | osa-mir5504      | 0.000    | 1.000     | NA     | osa-mir399k      | 0    | 1    | NA |
| osa-mir7694-5p  | 0.000   | 2.000    | NA     | osa-mir5505      | 0.000    | 2.000     | NA     | osa-mir440       | 0    | 2    | NA |
| osa-mir810a     | 0.000   | 1.000    | NA     | osa-mir5510      | 0.000    | 1.000     | NA     | osa-mir444b-1    | 0    | 1656 | NA |
| osa-mir810b     | 0.000   | 3.000    | NA     | osa-mir5540      | 0.000    | 8.000     | NA     | osa-mir444d-3    | 0    | 114  | NA |
|                 |         |          |        | osa-mir5810      | 0.000    | 1.000     | NA     | osa-mir5083      | 0    | 2    | NA |
|                 |         |          |        | osa-mir5815      | 0.000    | 1.000     | NA     | osa-mir5144-3p   | 0    | 2    | NA |
|                 |         |          |        | osa-mir5825      | 0.000    | 1.000     | NA     | osa-mir5145      | 0    | 2    | NA |
|                 |         |          |        | osa-mir7694-5p   | 0.000    | 1.000     | NA     | osa-mir5157a-3p  | 0    | 1    | NA |
|                 |         |          |        |                  |          |           |        | osa-mir5161      | 0    | 1    | NA |
|                 |         |          |        |                  |          |           |        | osa-mir5493      | 0    | 1    | NA |
|                 |         |          |        |                  |          |           |        | osa-mir5504      | 0    | 1    | NA |
|                 |         |          |        |                  |          |           |        | osa-mir5505      | 0    | 2    | NA |
|                 |         |          |        |                  |          |           |        | osa-mir5510      | 0    | 1    | NA |
|                 |         |          |        |                  |          |           |        | osa-mir5810      | 0    | 1    | NA |
|                 |         |          |        |                  |          |           |        | osa-mir5813      | 0    | 1    | NA |
|                 |         |          |        |                  |          |           |        | osa-mir5815      | 0    | 1    | NA |
|                 |         |          |        |                  |          |           |        | osa-mir810b-1    | 0    | 6    | NA |
